# Supplementary material
Source: PubMed Central journal article supplement (PMC9012890)

# THE LANCET

## Supplementary appendix

This appendix formed part of the original submission and has been peer reviewed. We post it as supplied by the authors.

Supplement to: COVID-19 Forecasting Team. Variation in the COVID-19 infection–fatality ratio by age, time, and geography during the pre-vaccine era: a systematic analysis. *Lancet* 2022; published online Feb 24. [https://doi.org/10.1016/S0140-6736\(21\)02867-1](https://doi.org/10.1016/S0140-6736(21)02867-1).

# Philippines

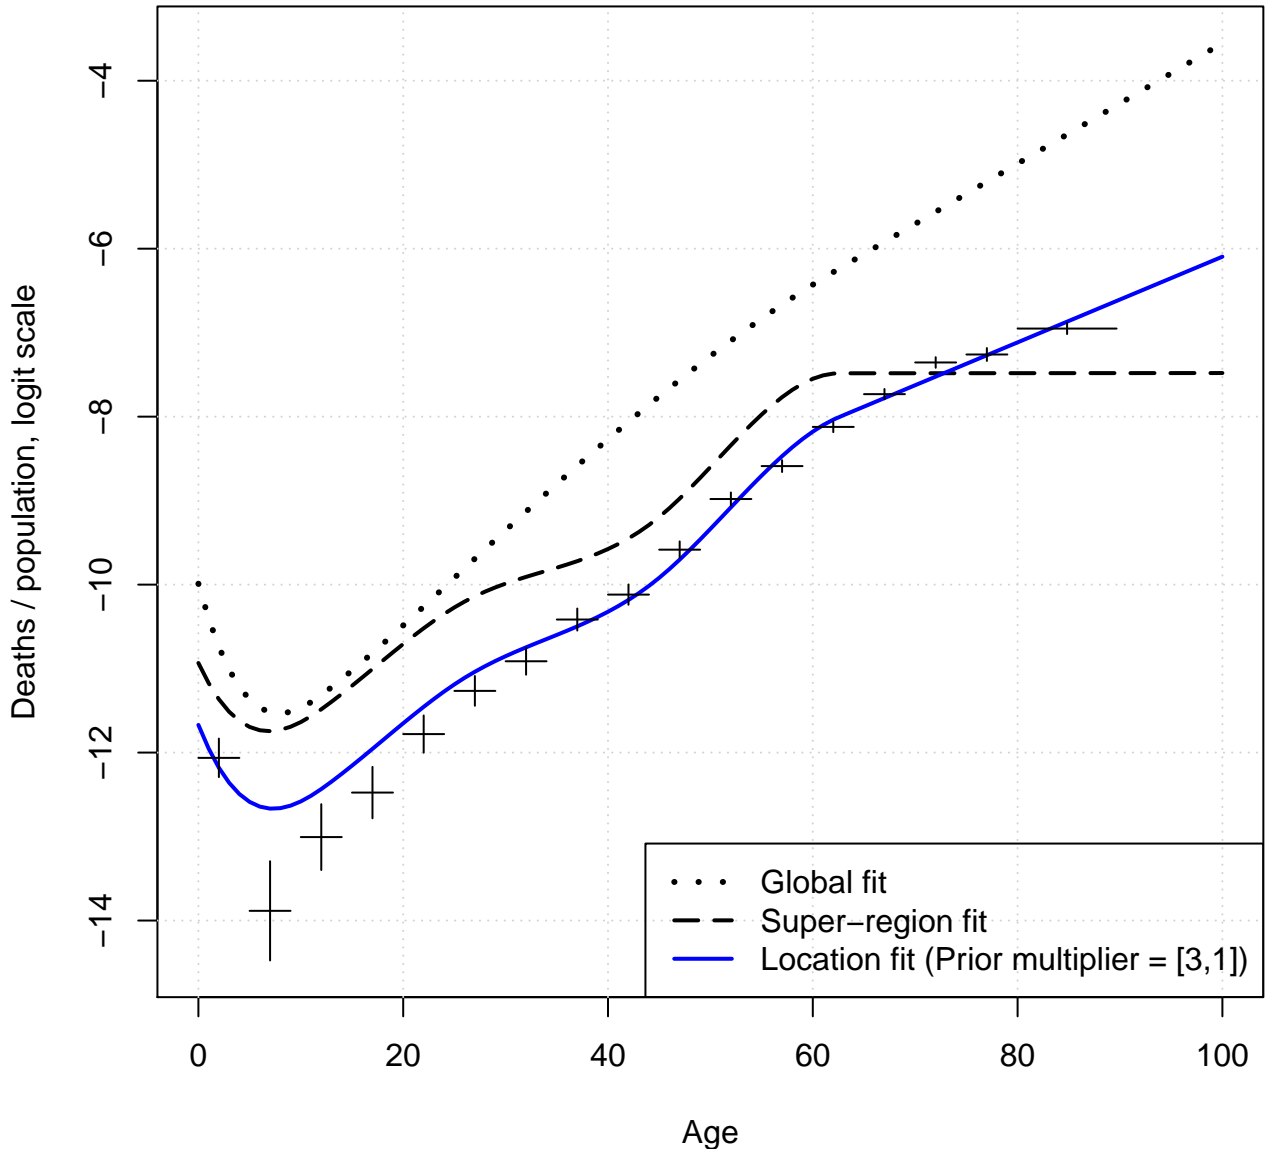

# Romania

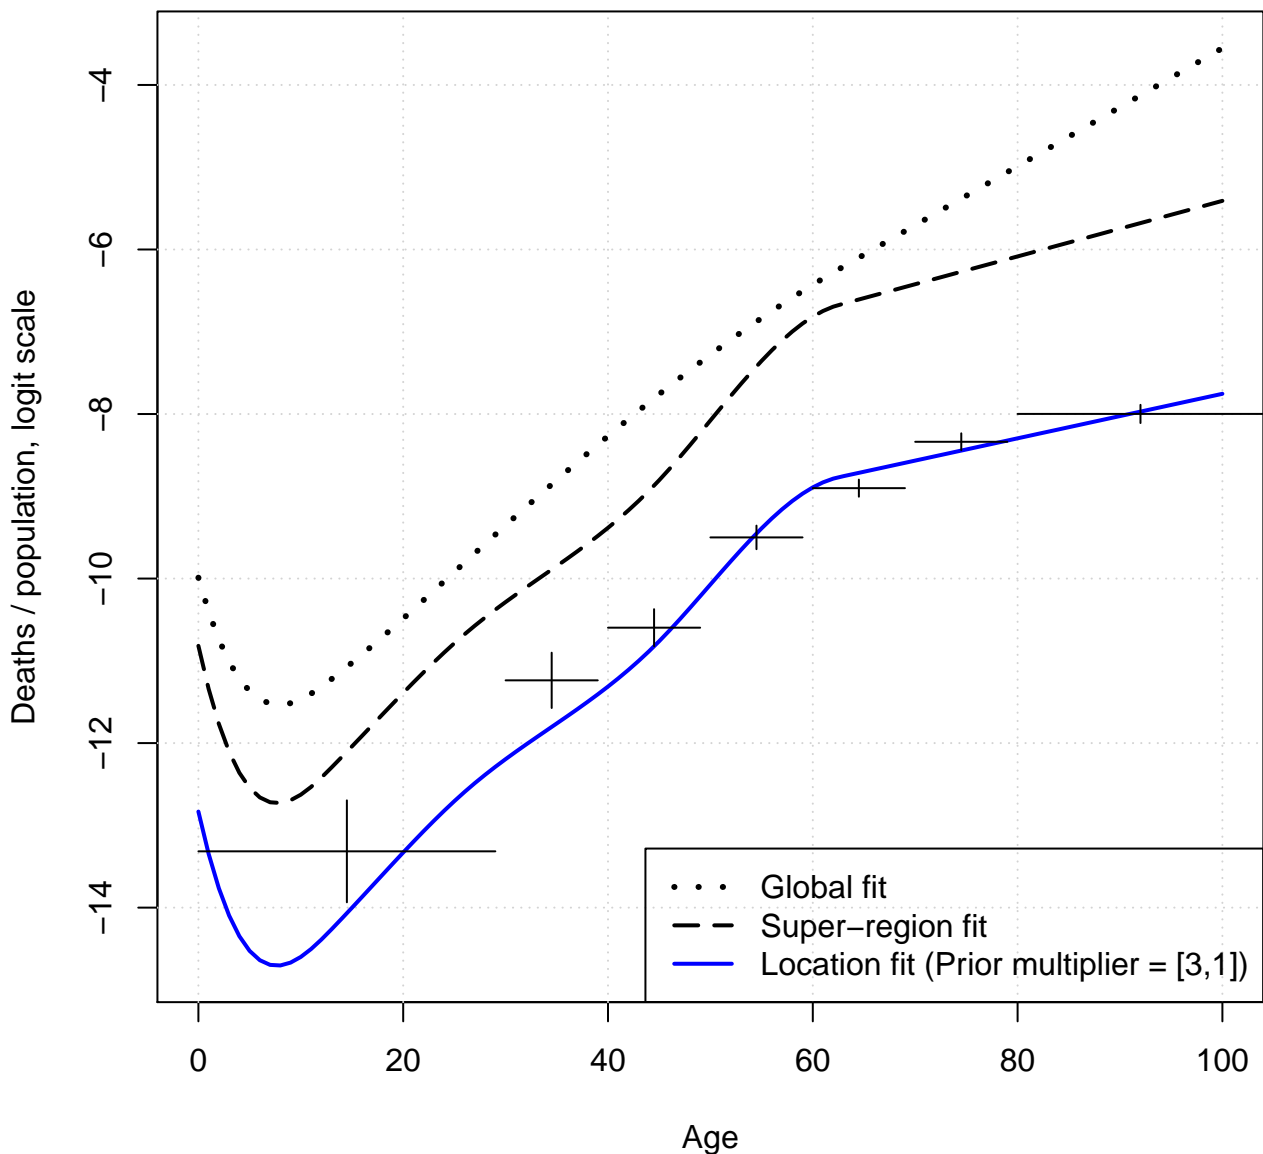

# Republic of Moldova

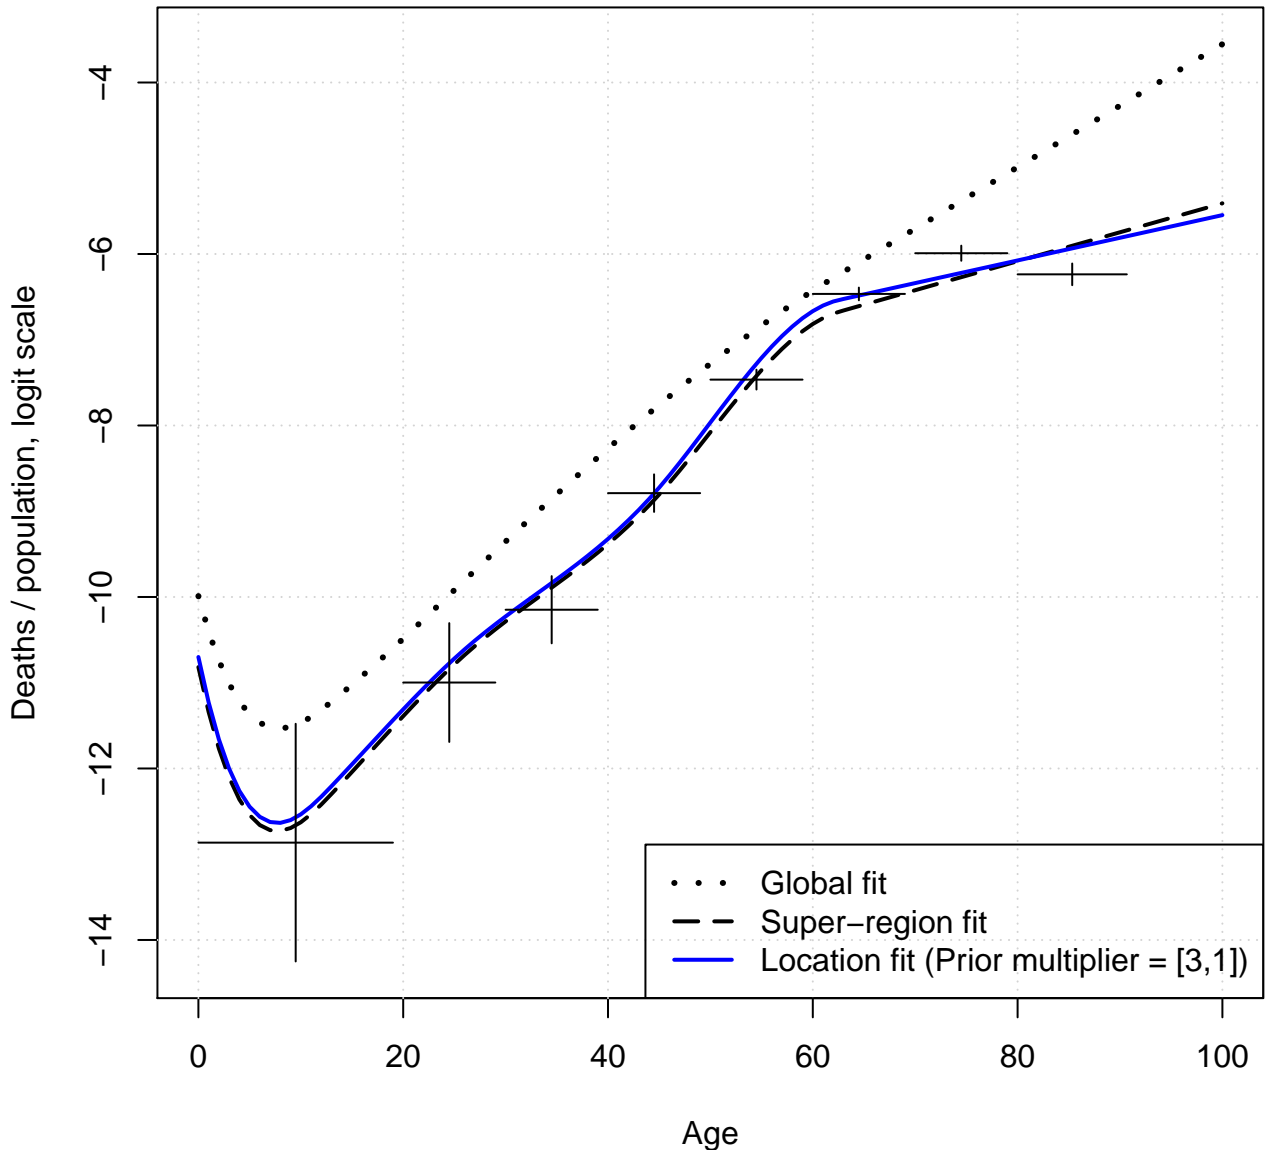

# Ukraine

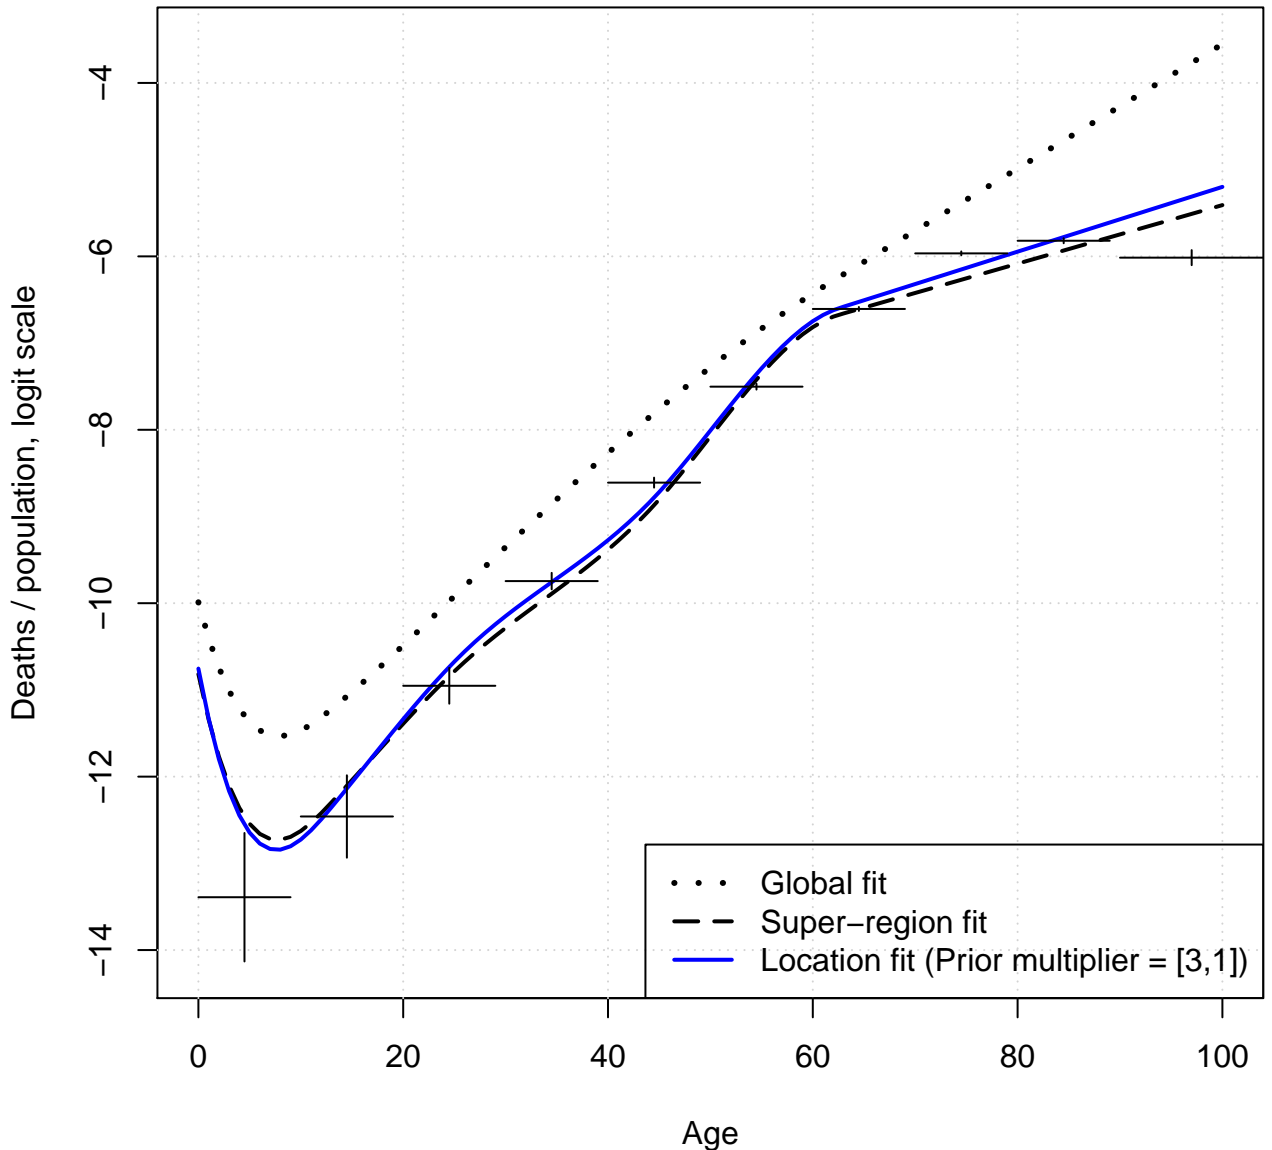

Figure S3. Age patterns of COVID-19 mortality for select countries and territories in the high-income super-region

## Japan

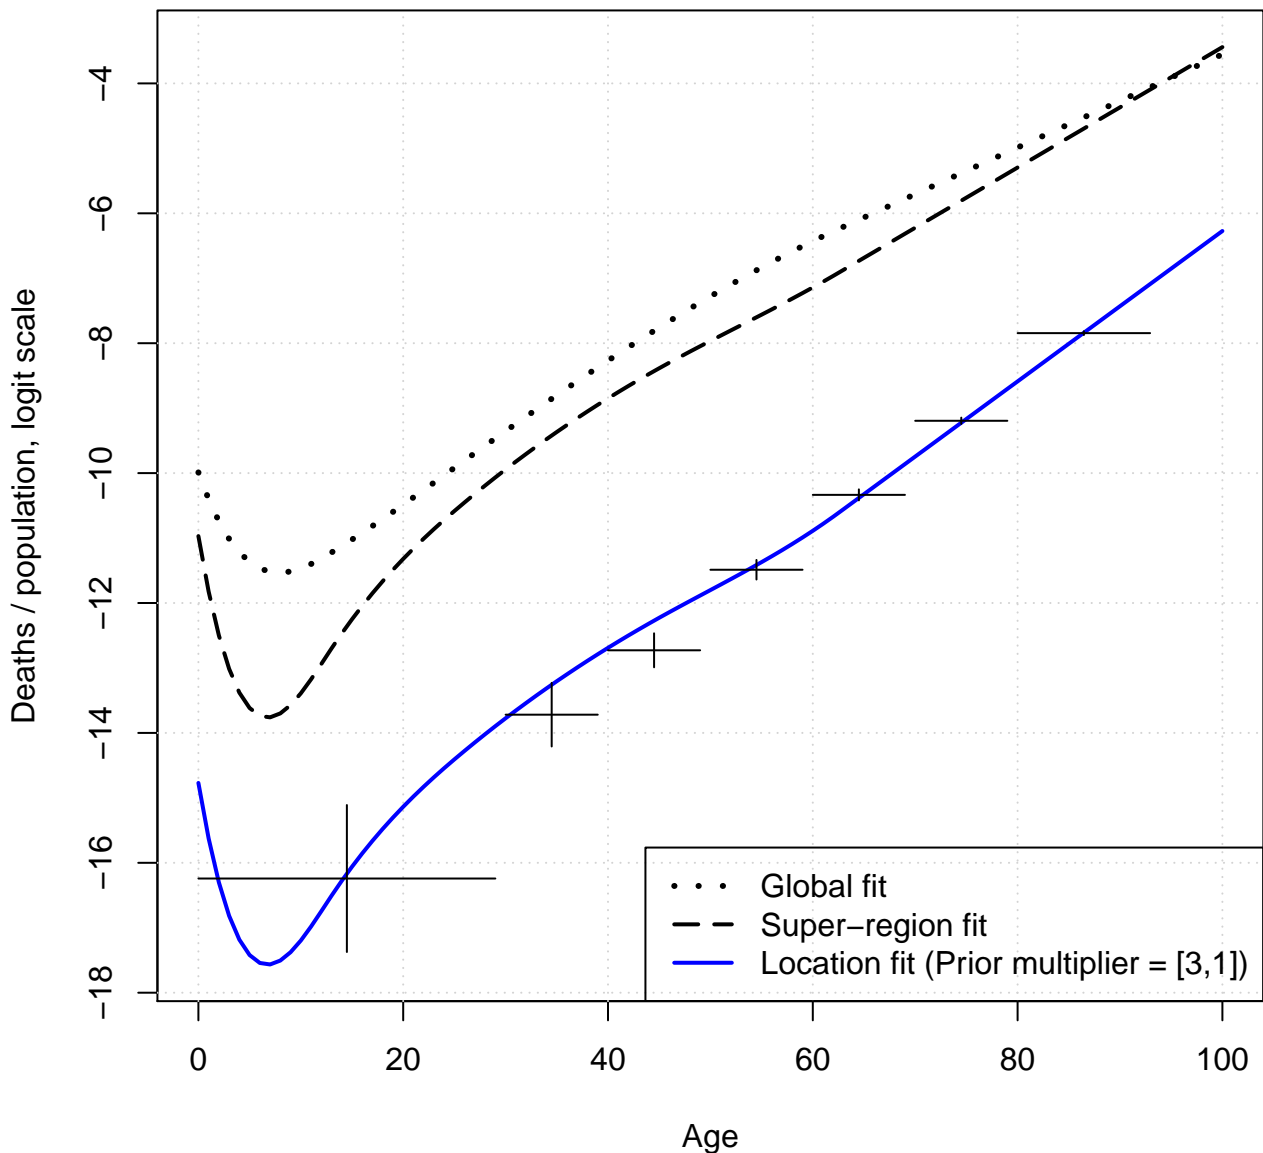

# Republic of Korea

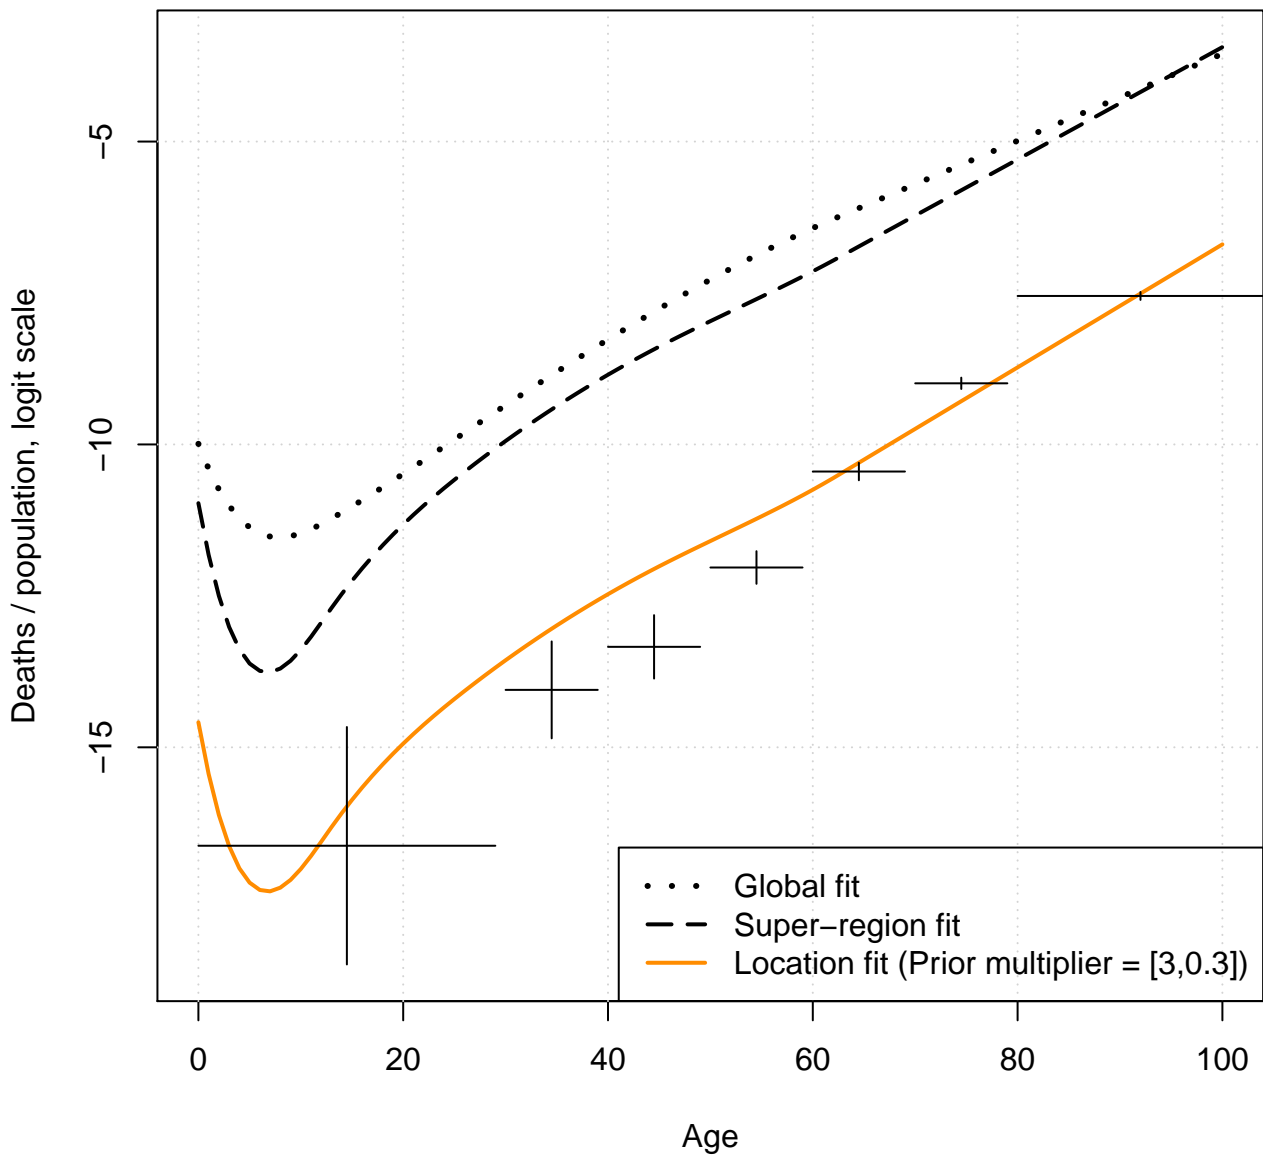

# Singapore

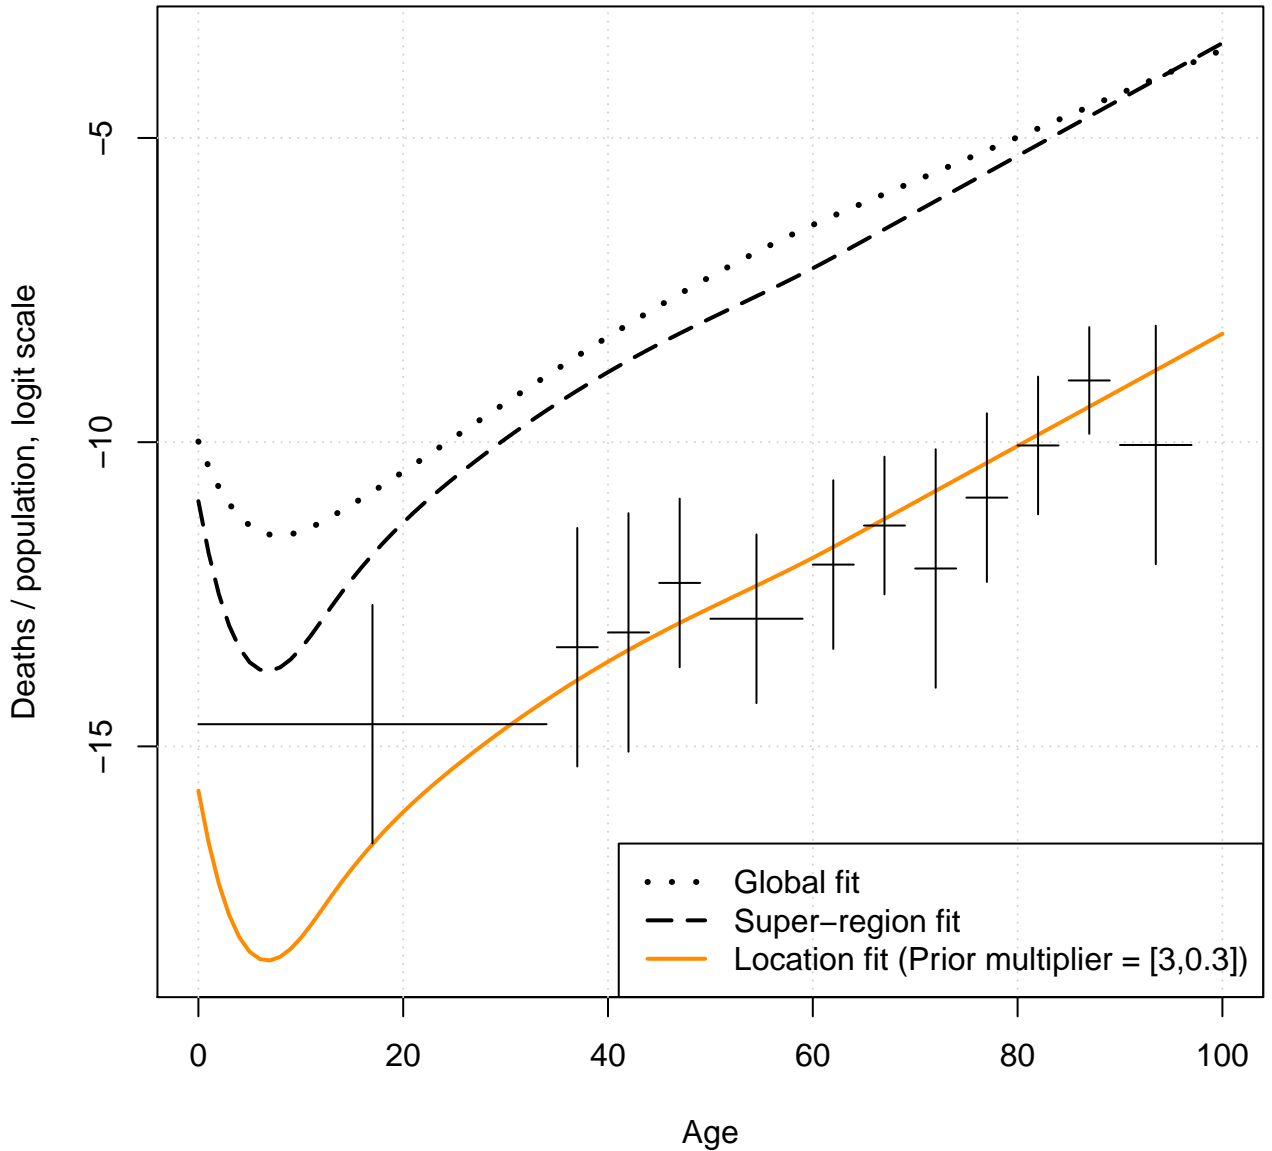



# Australia

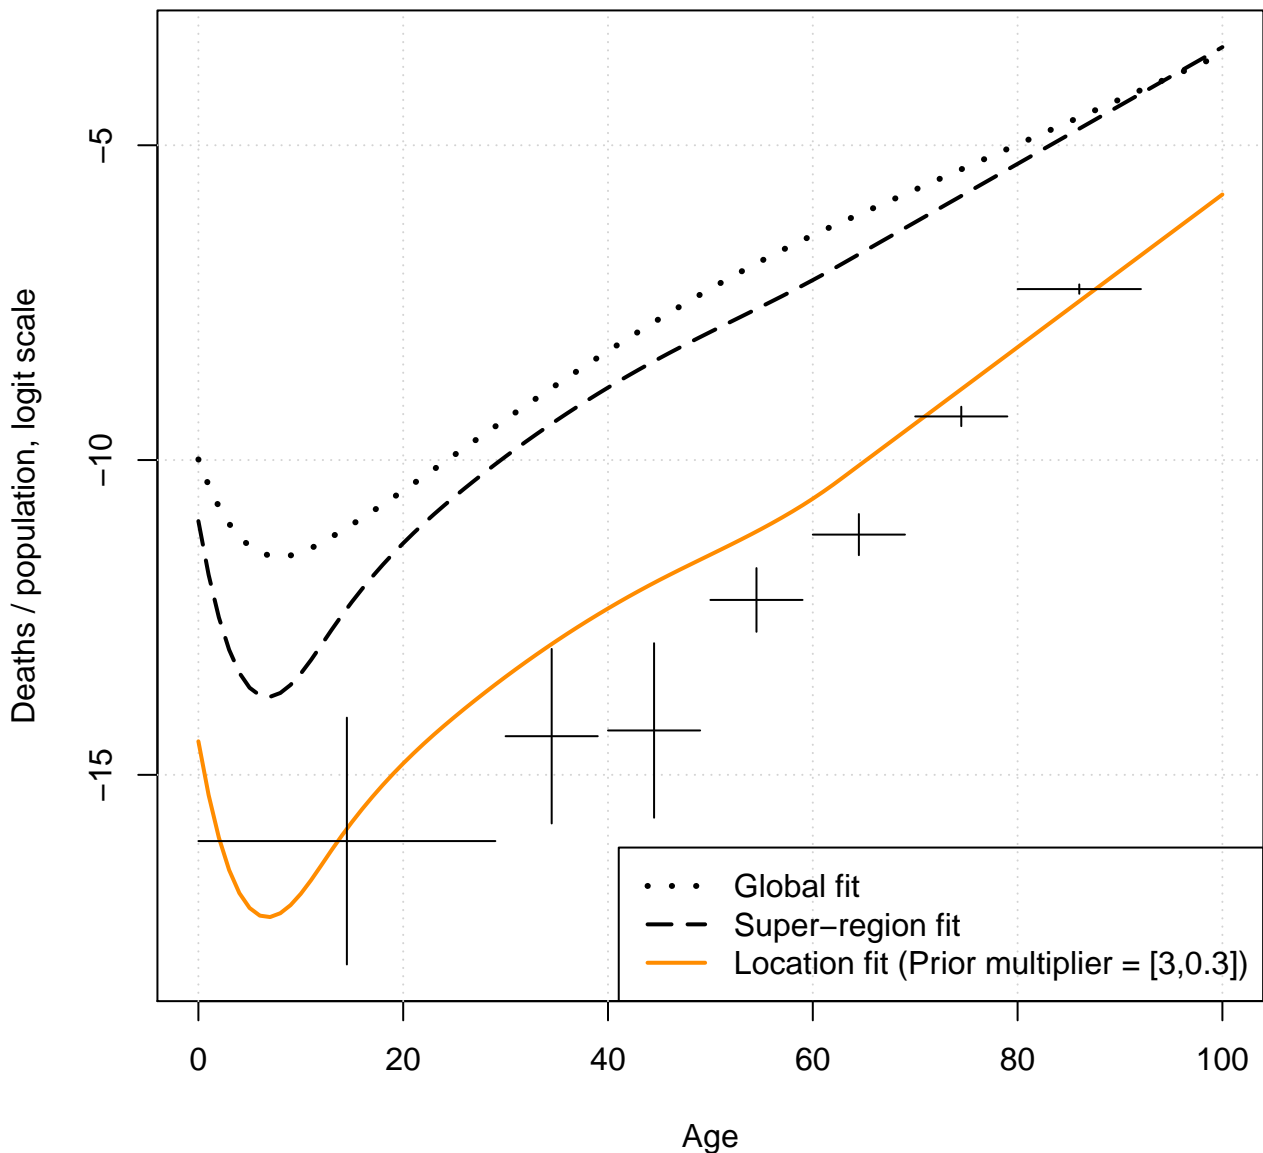

# New Zealand

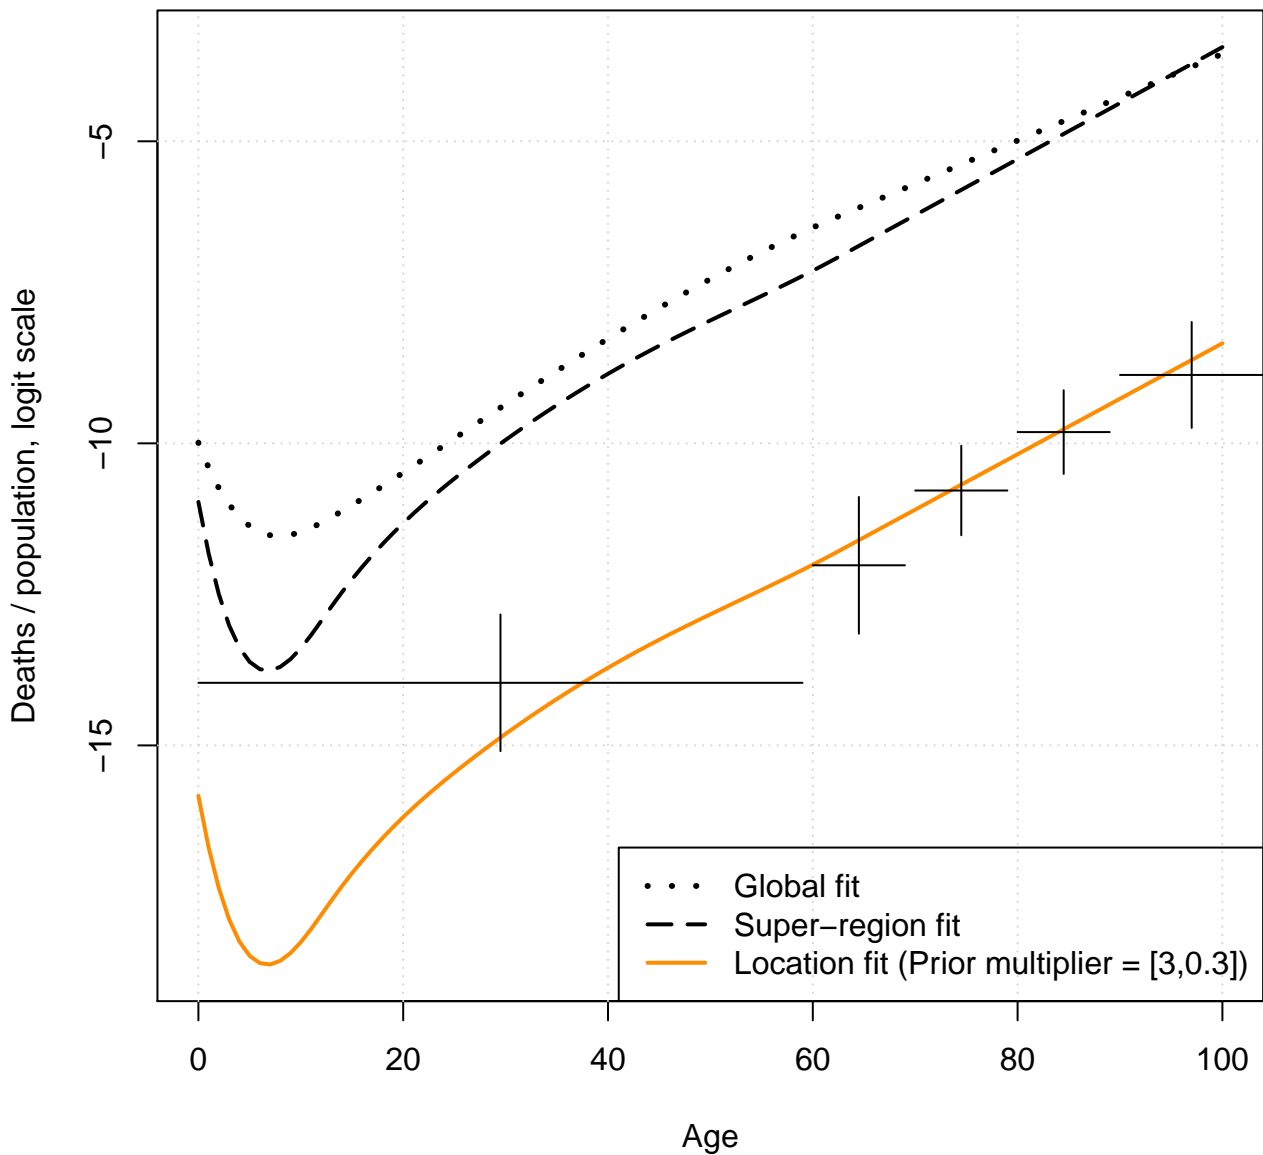

# Austria

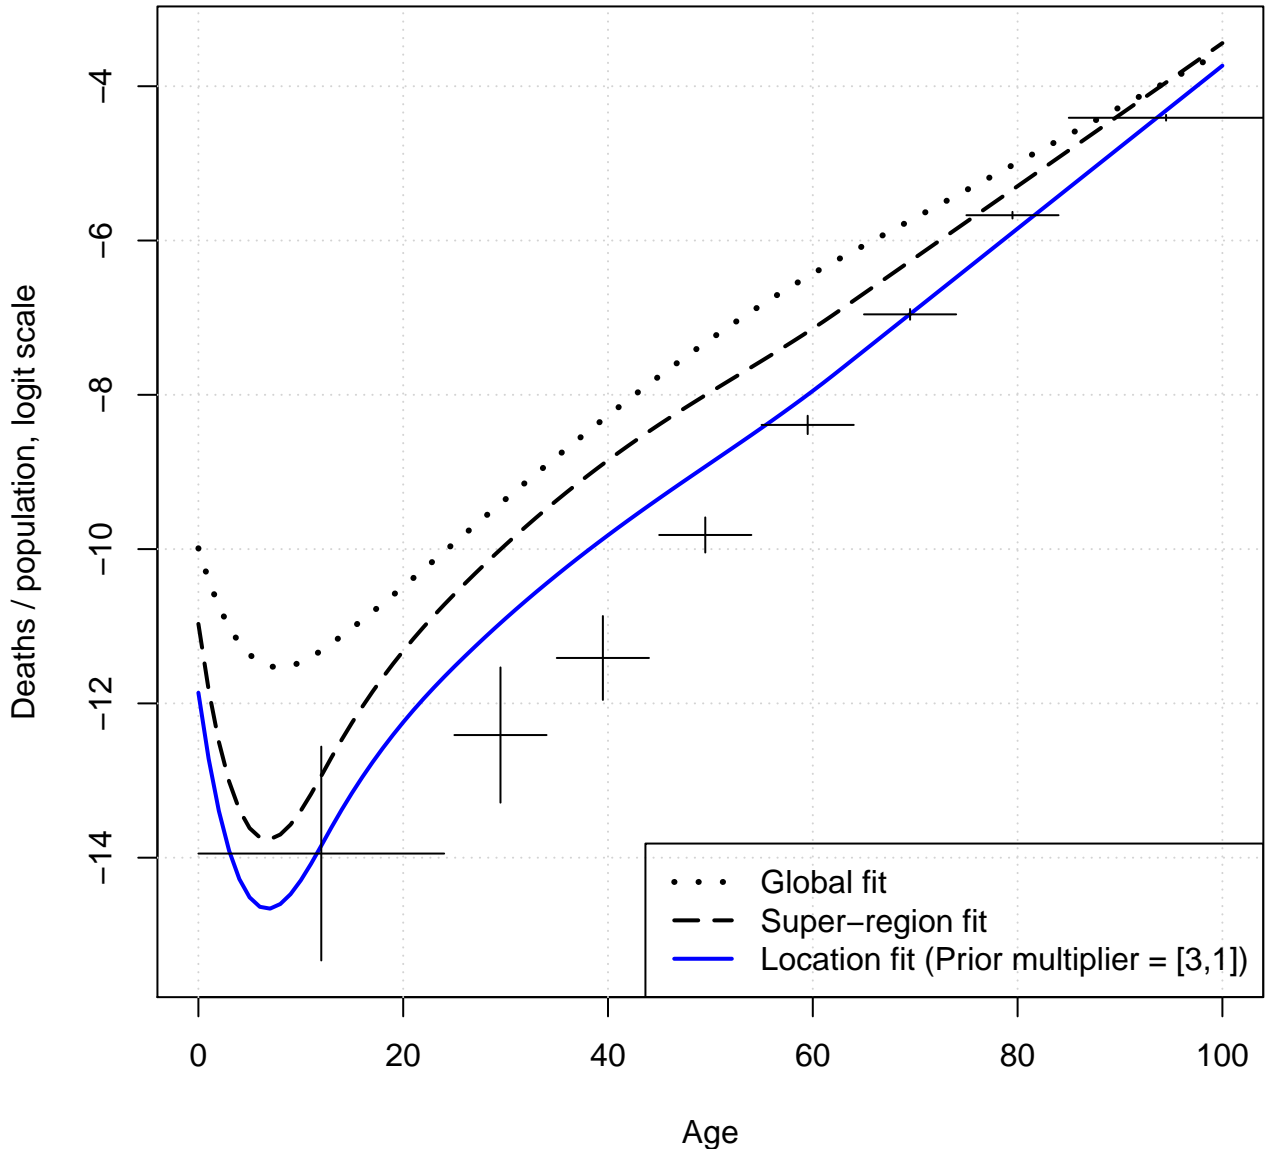

# Belgium

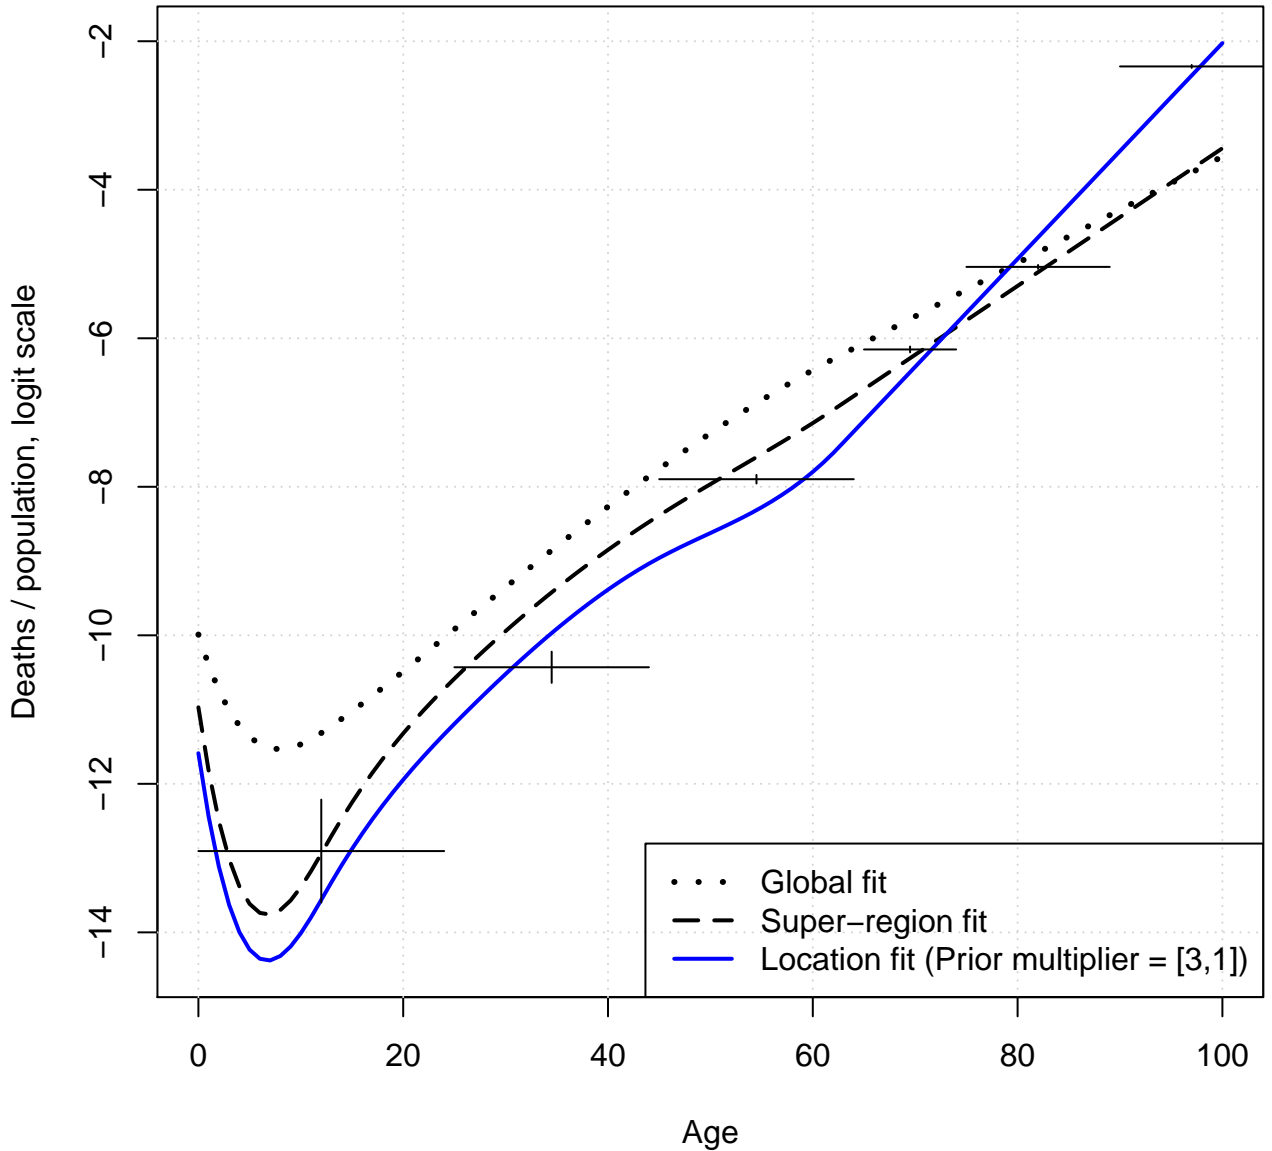

# Denmark

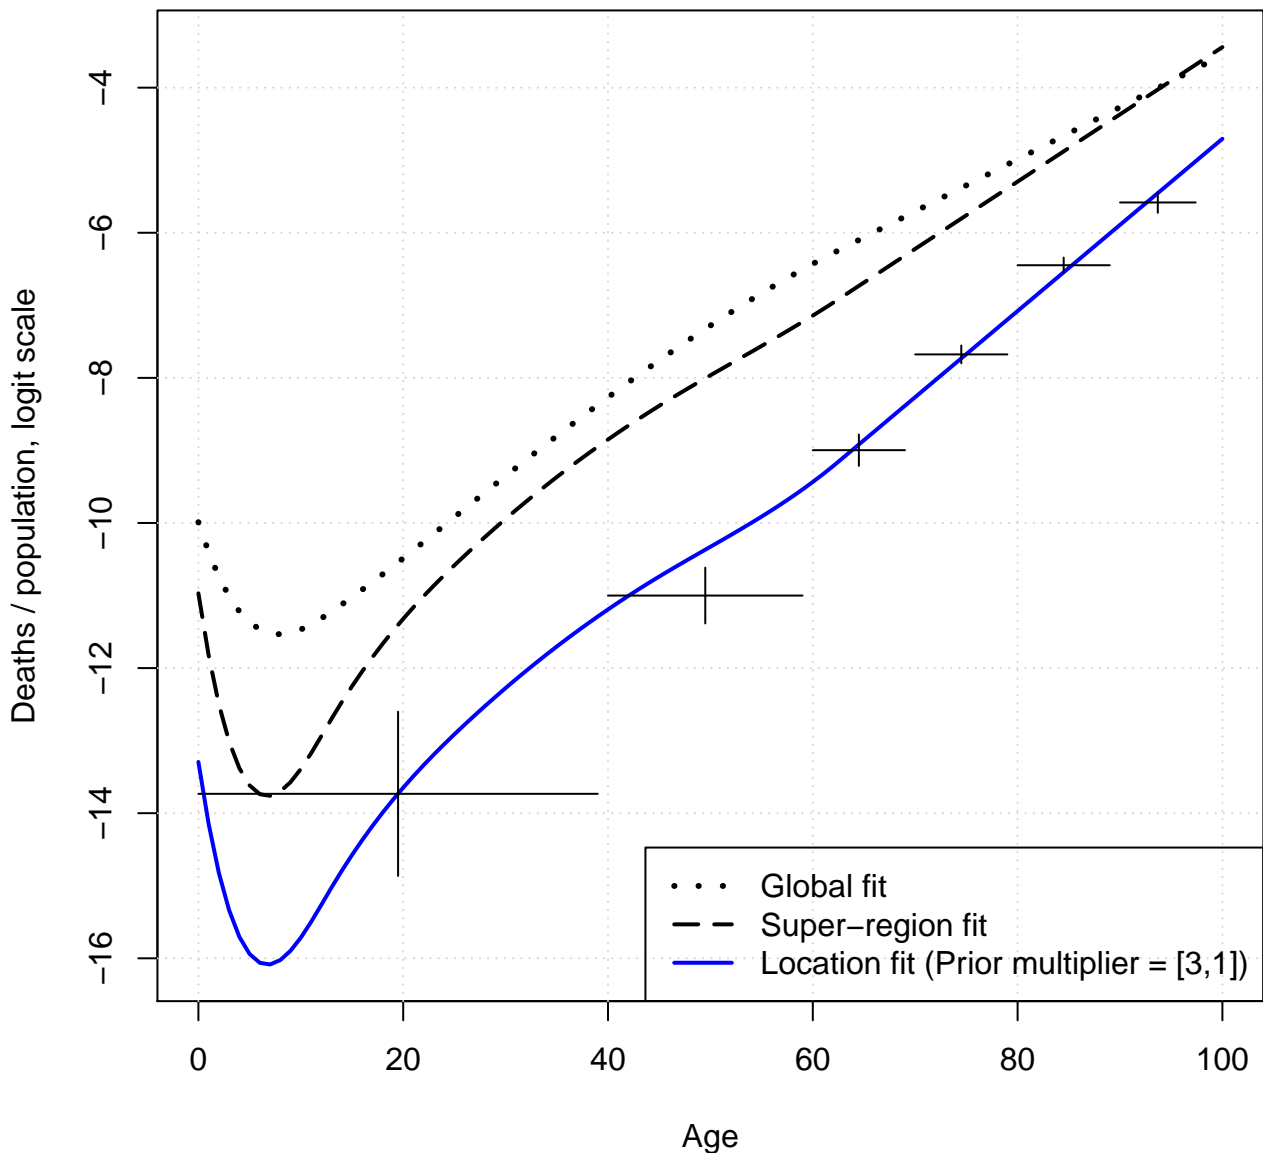

# Finland

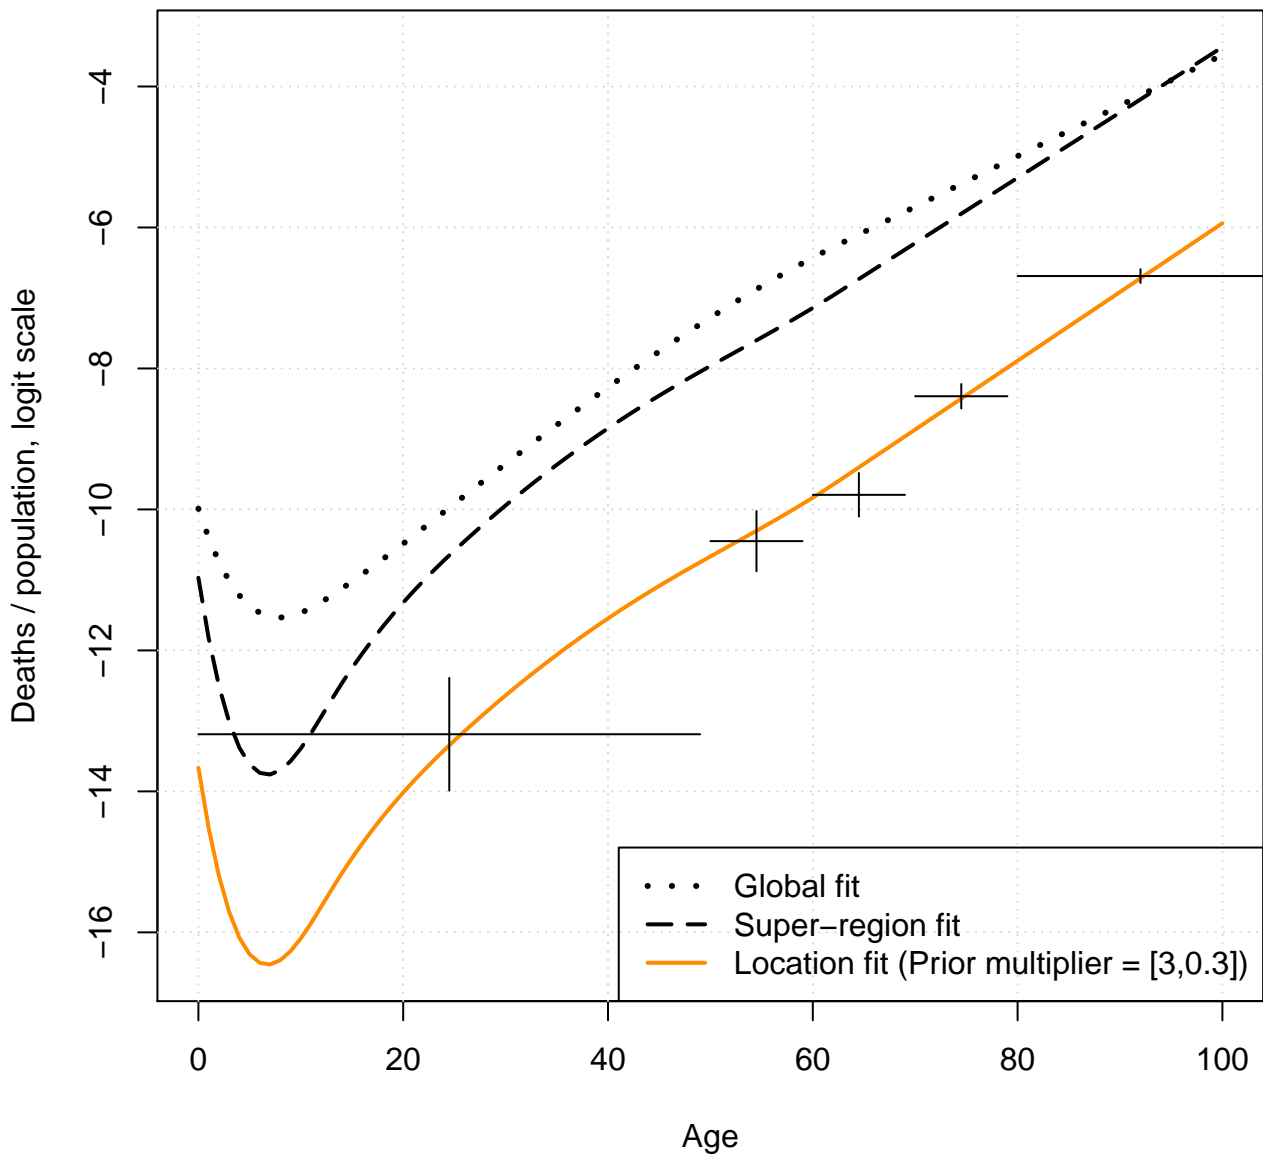

# France

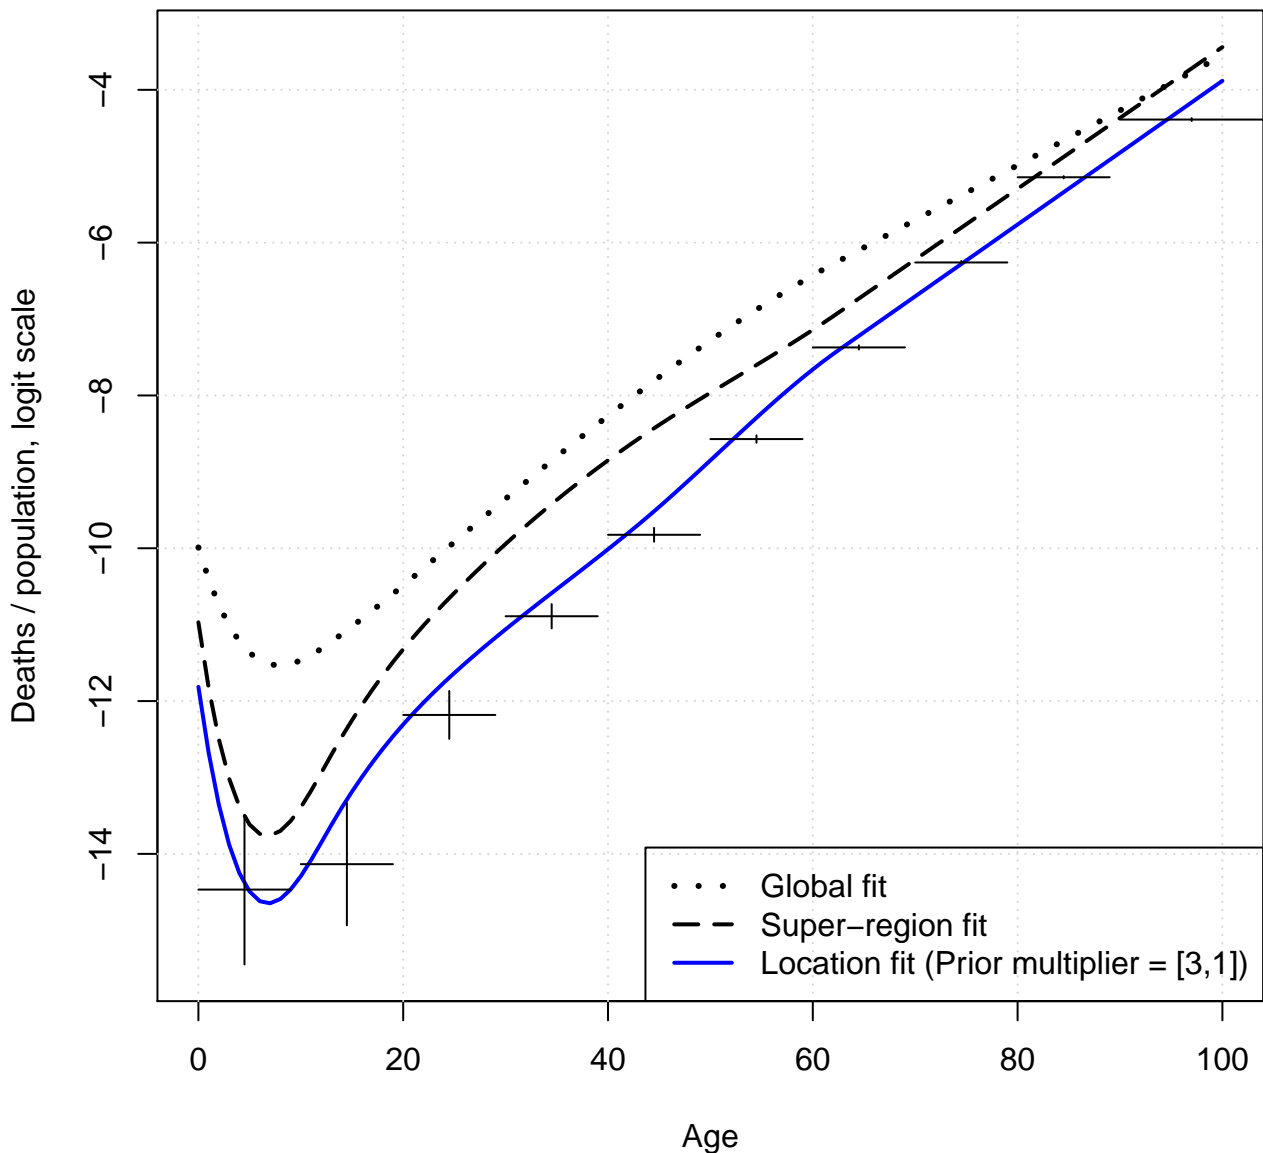

# Germany

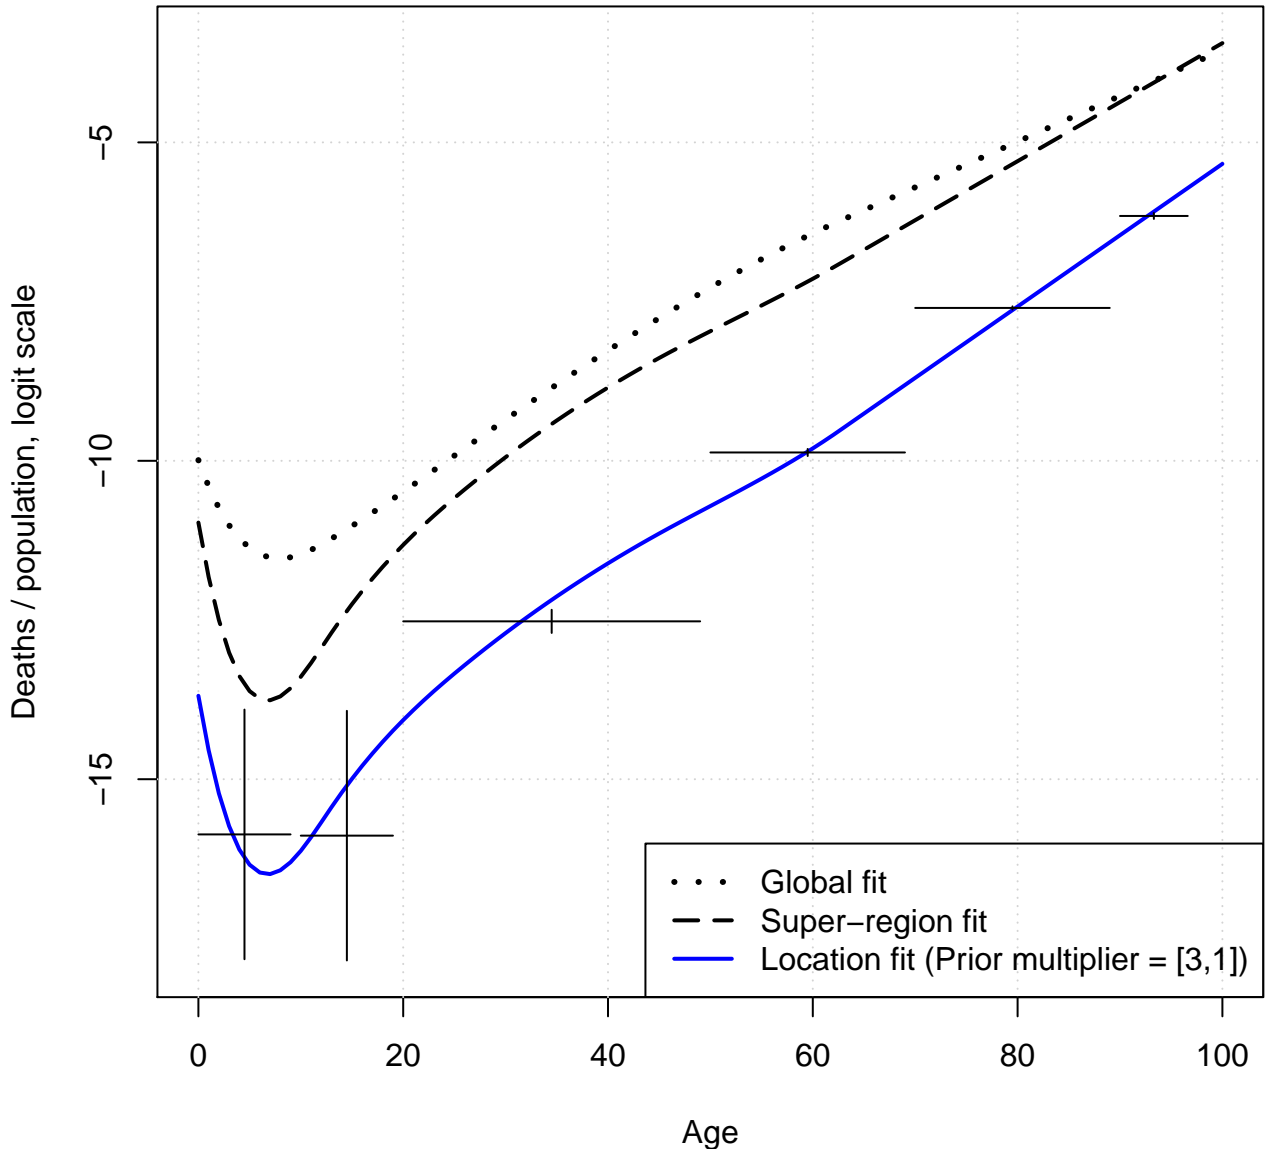



# Greece

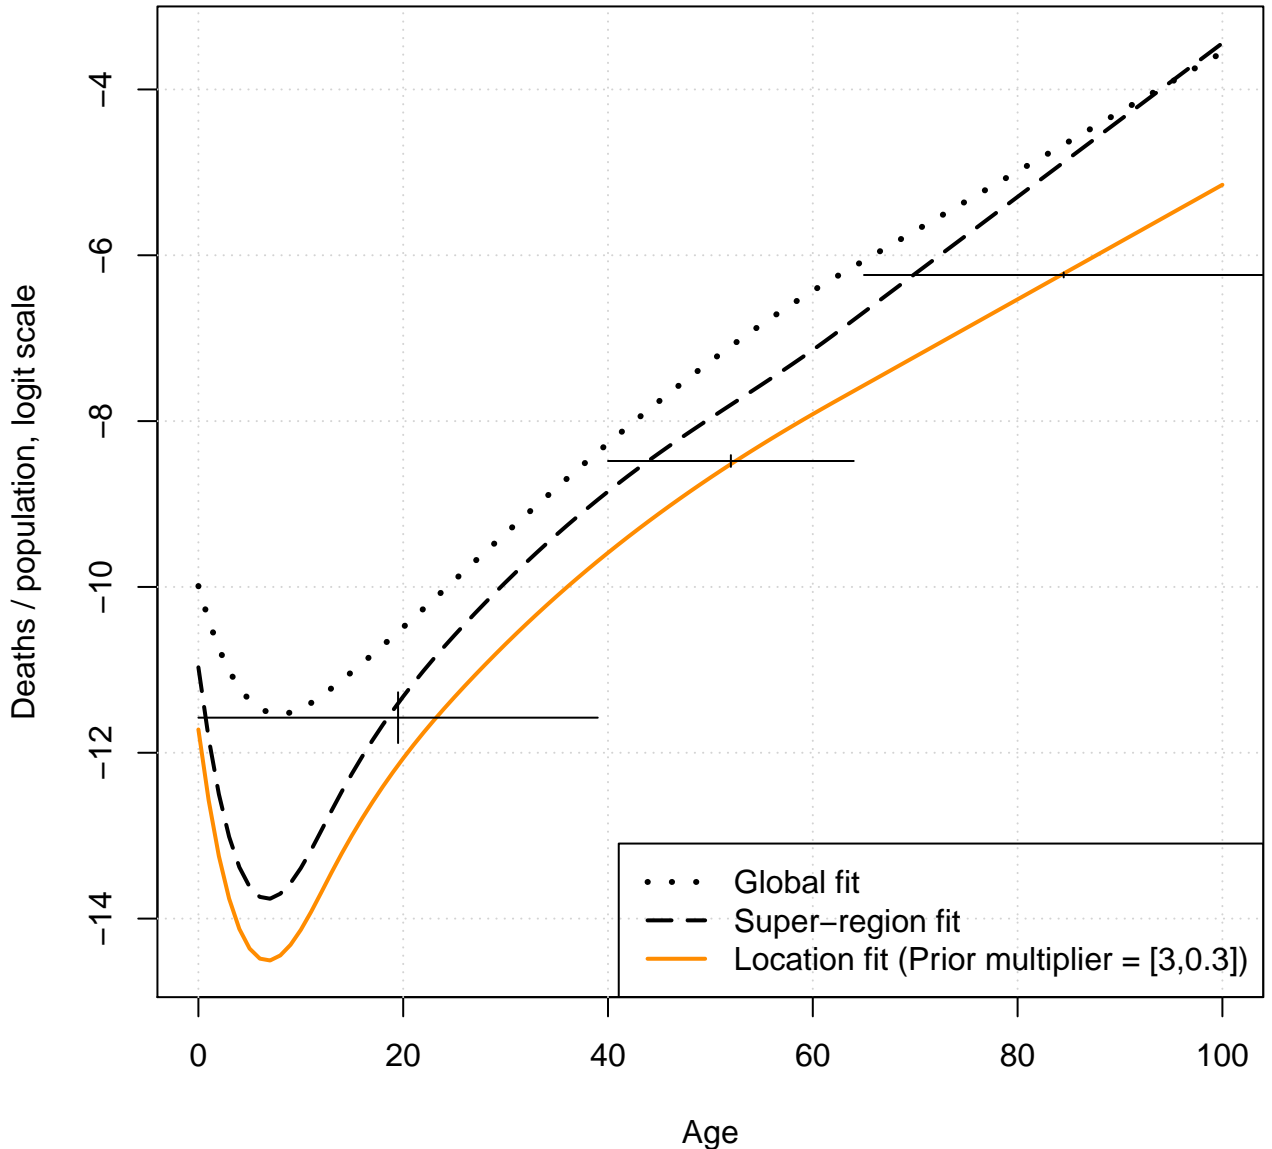

# Iceland

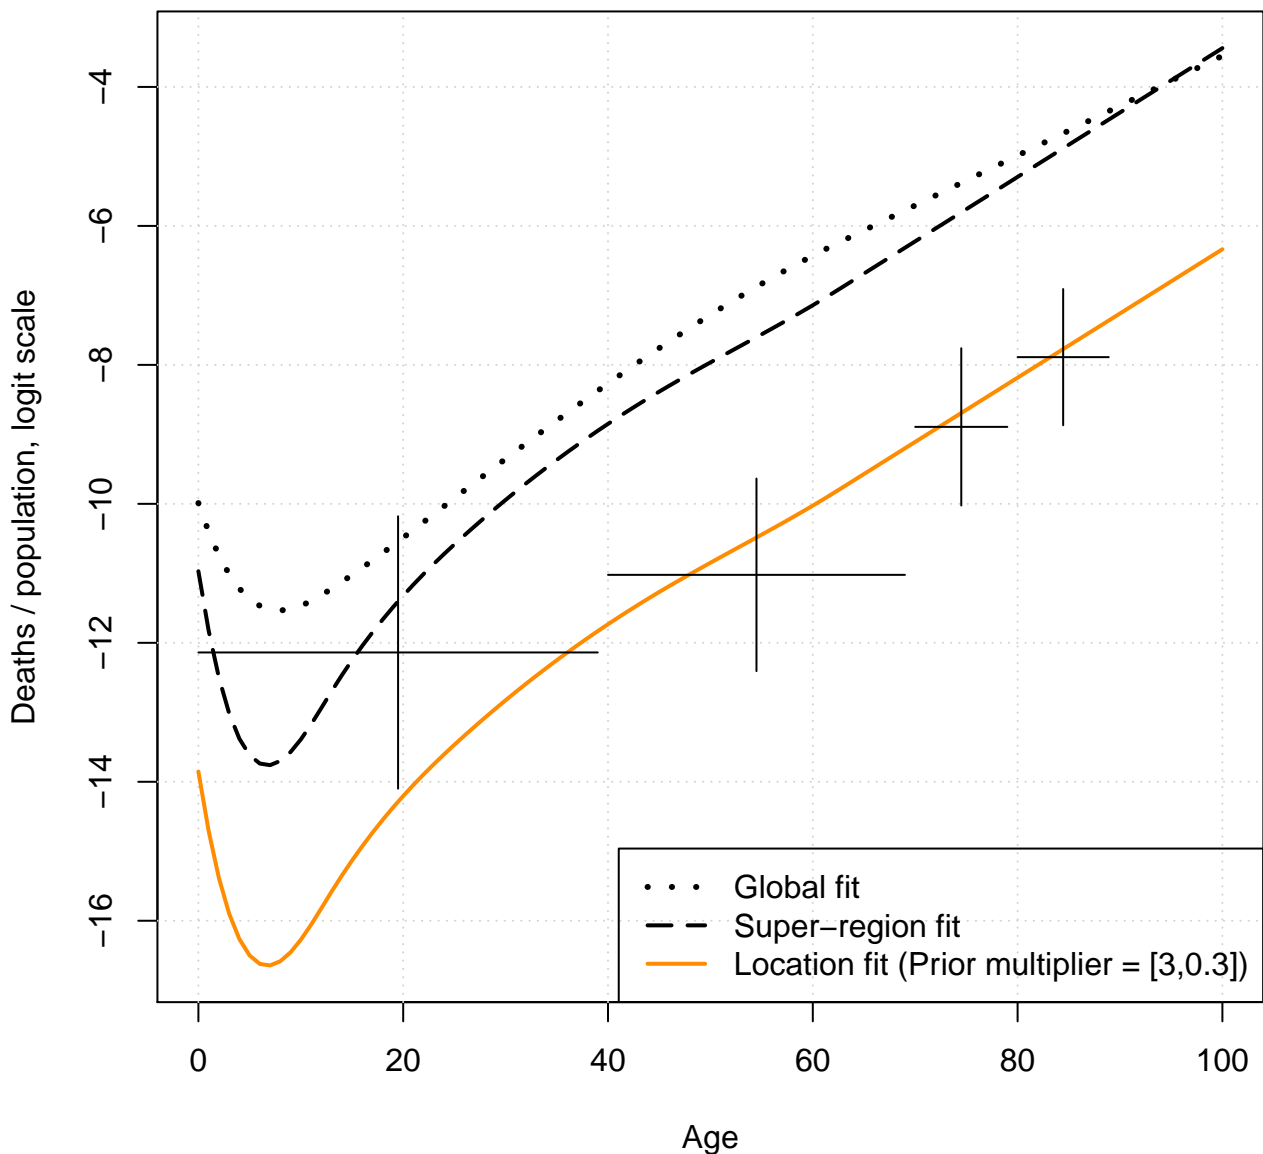

# Israel

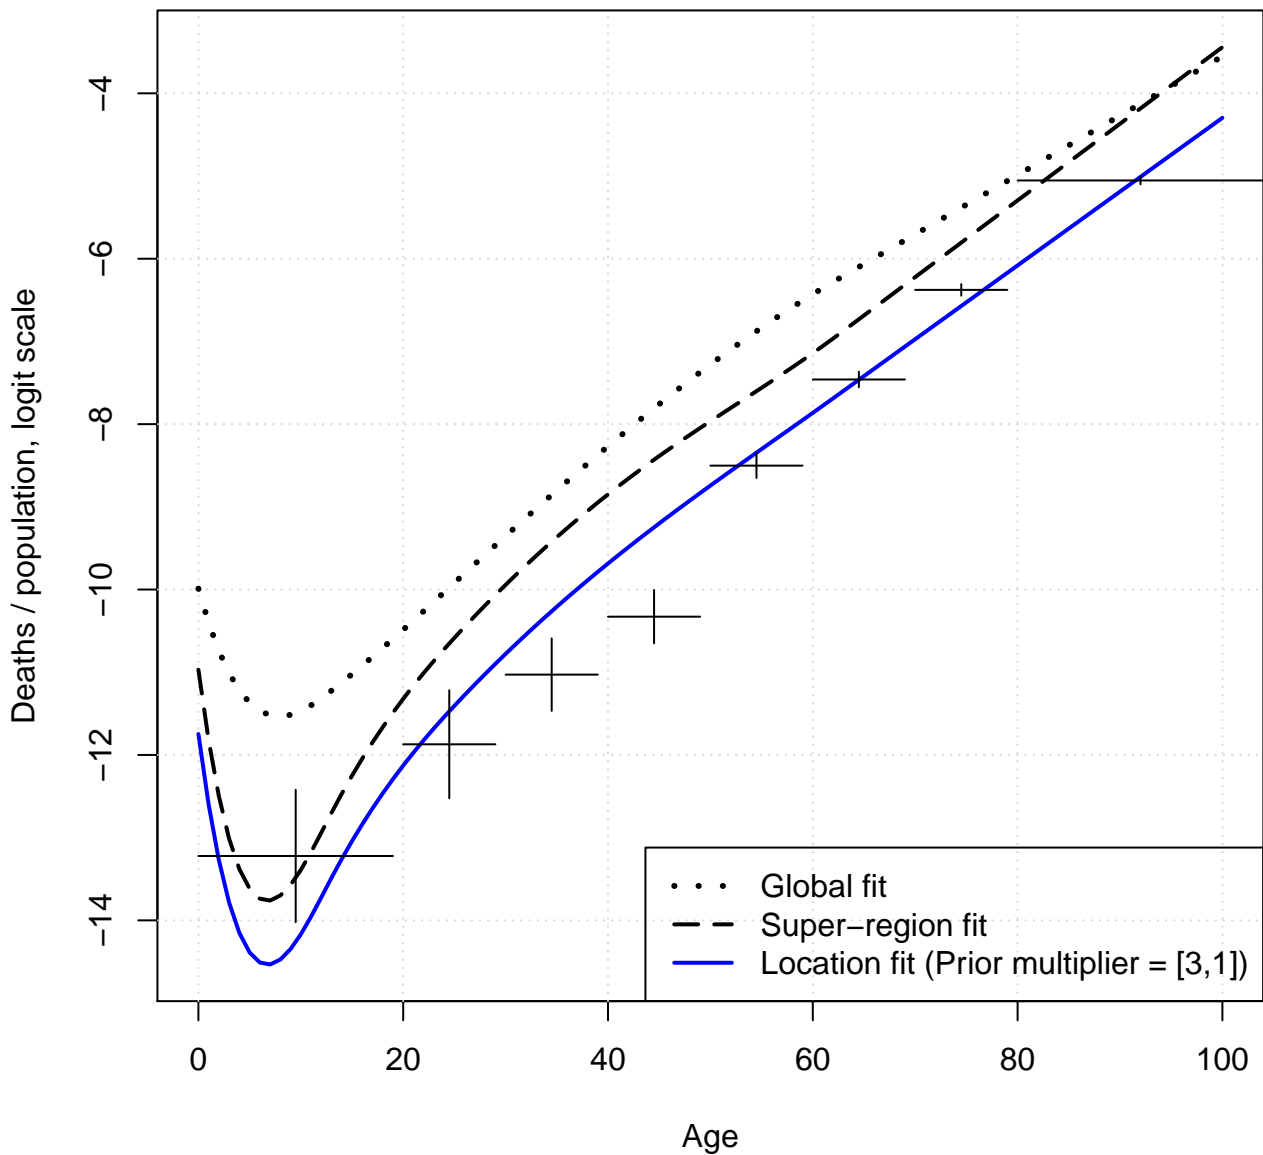

# Italy

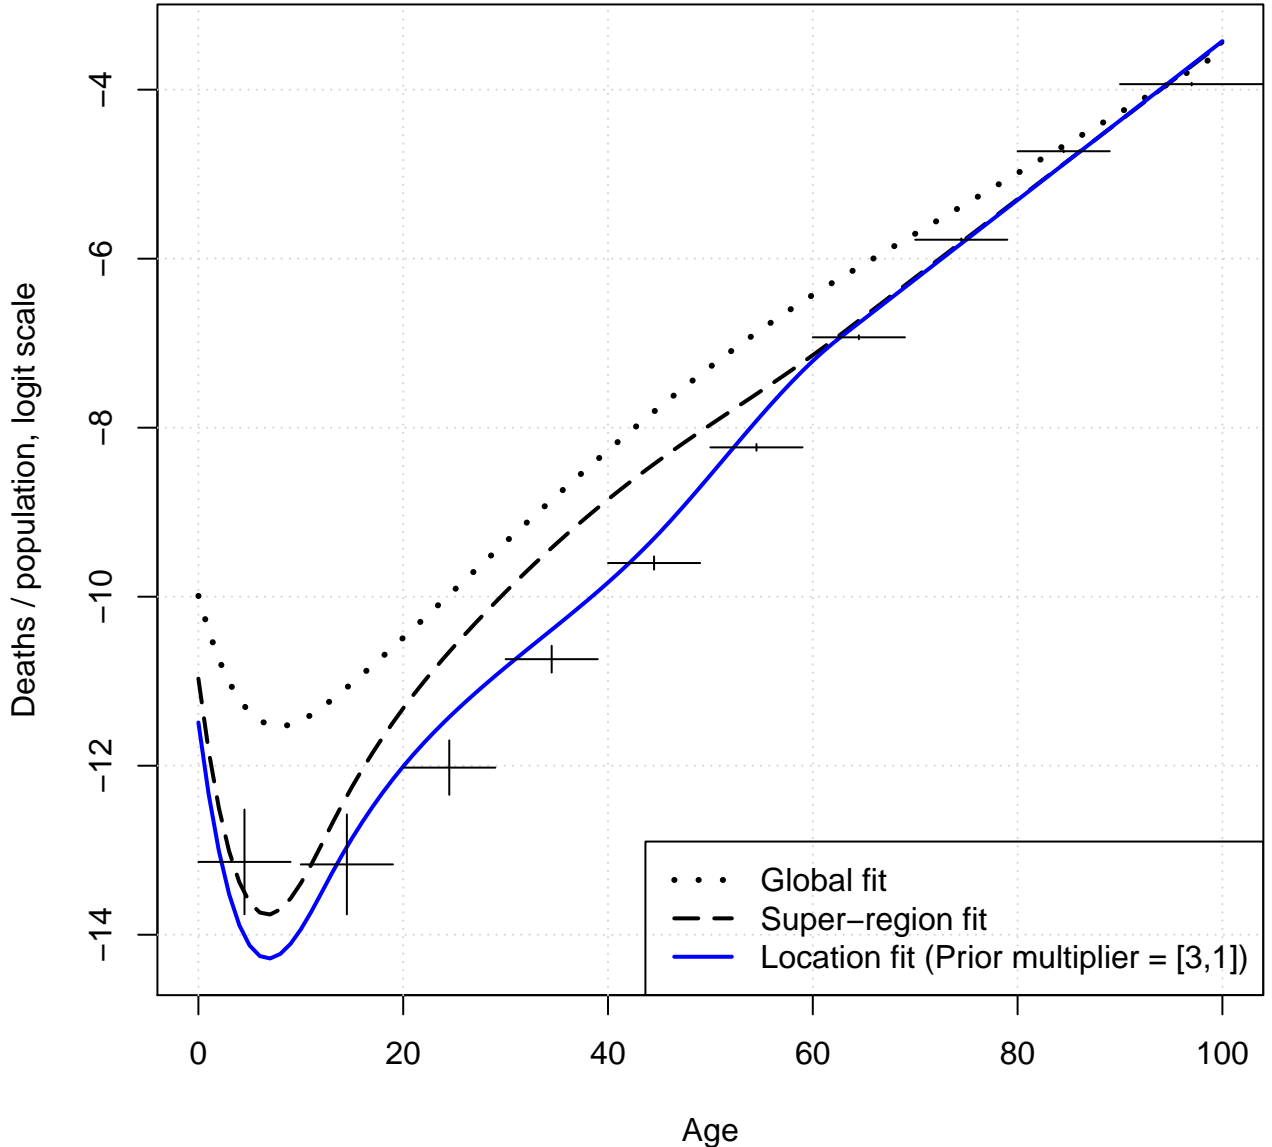

# Netherlands

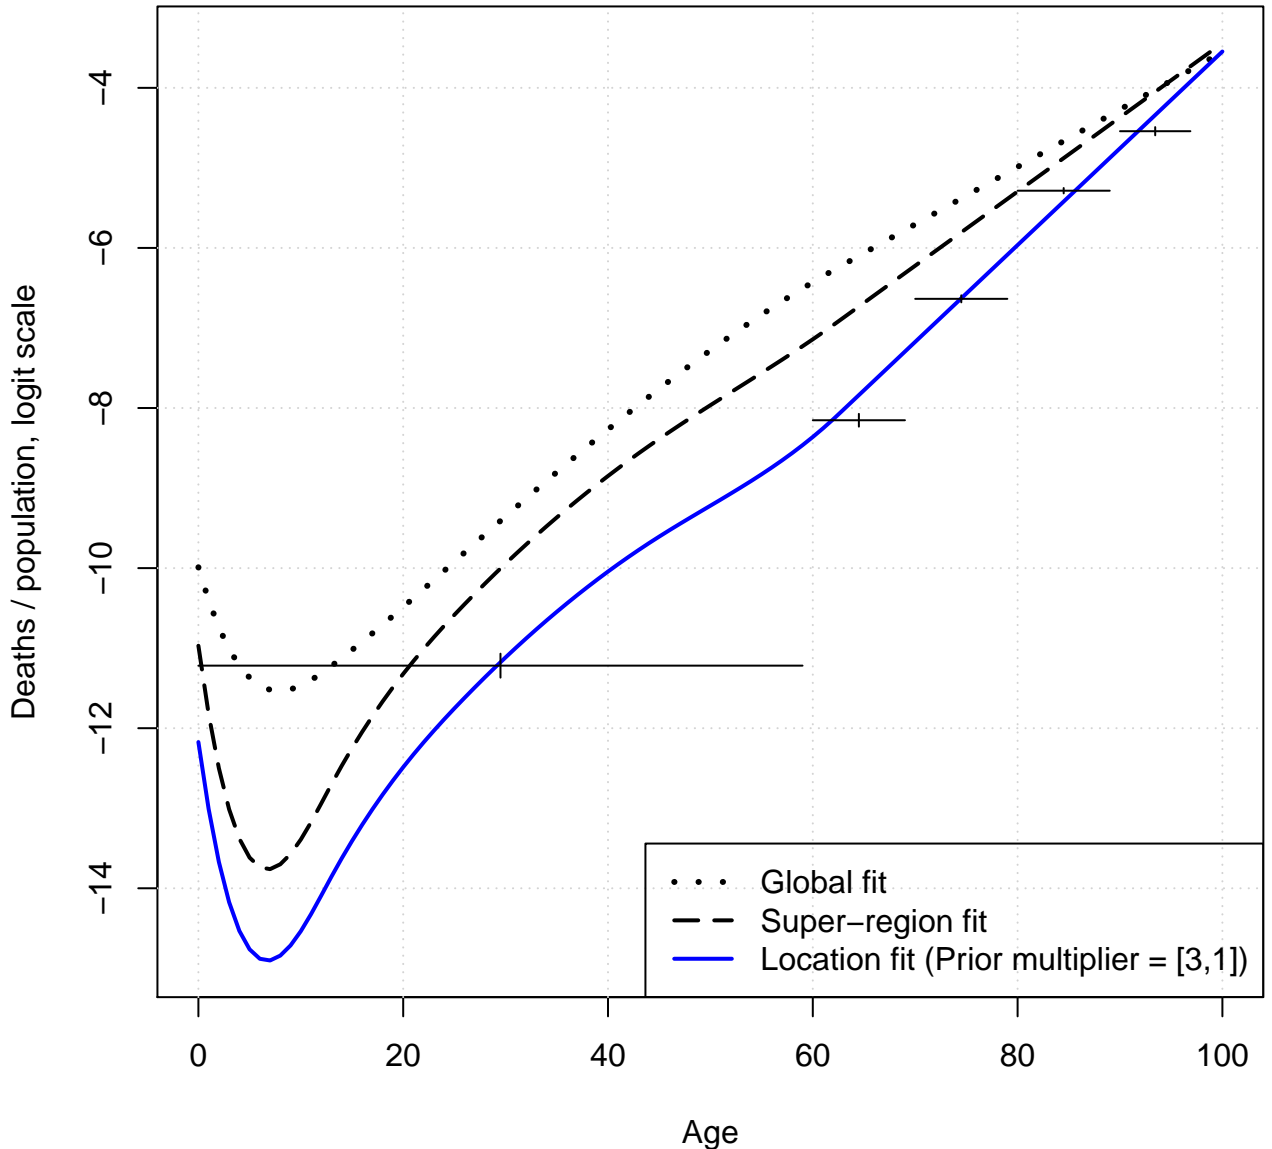

# Norway

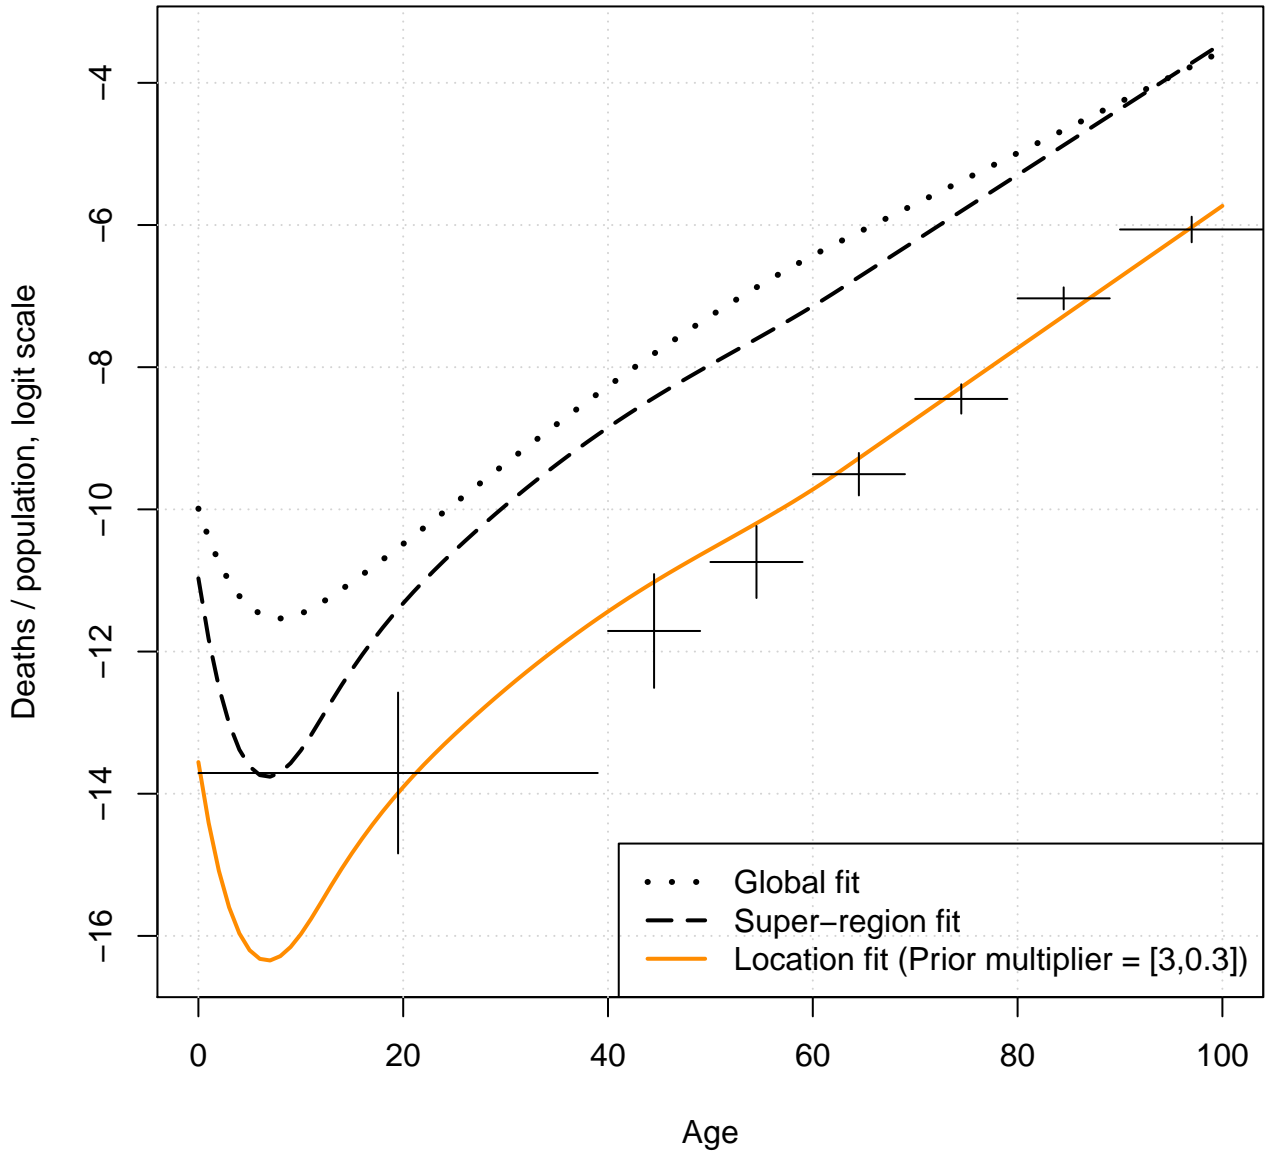

# Portugal

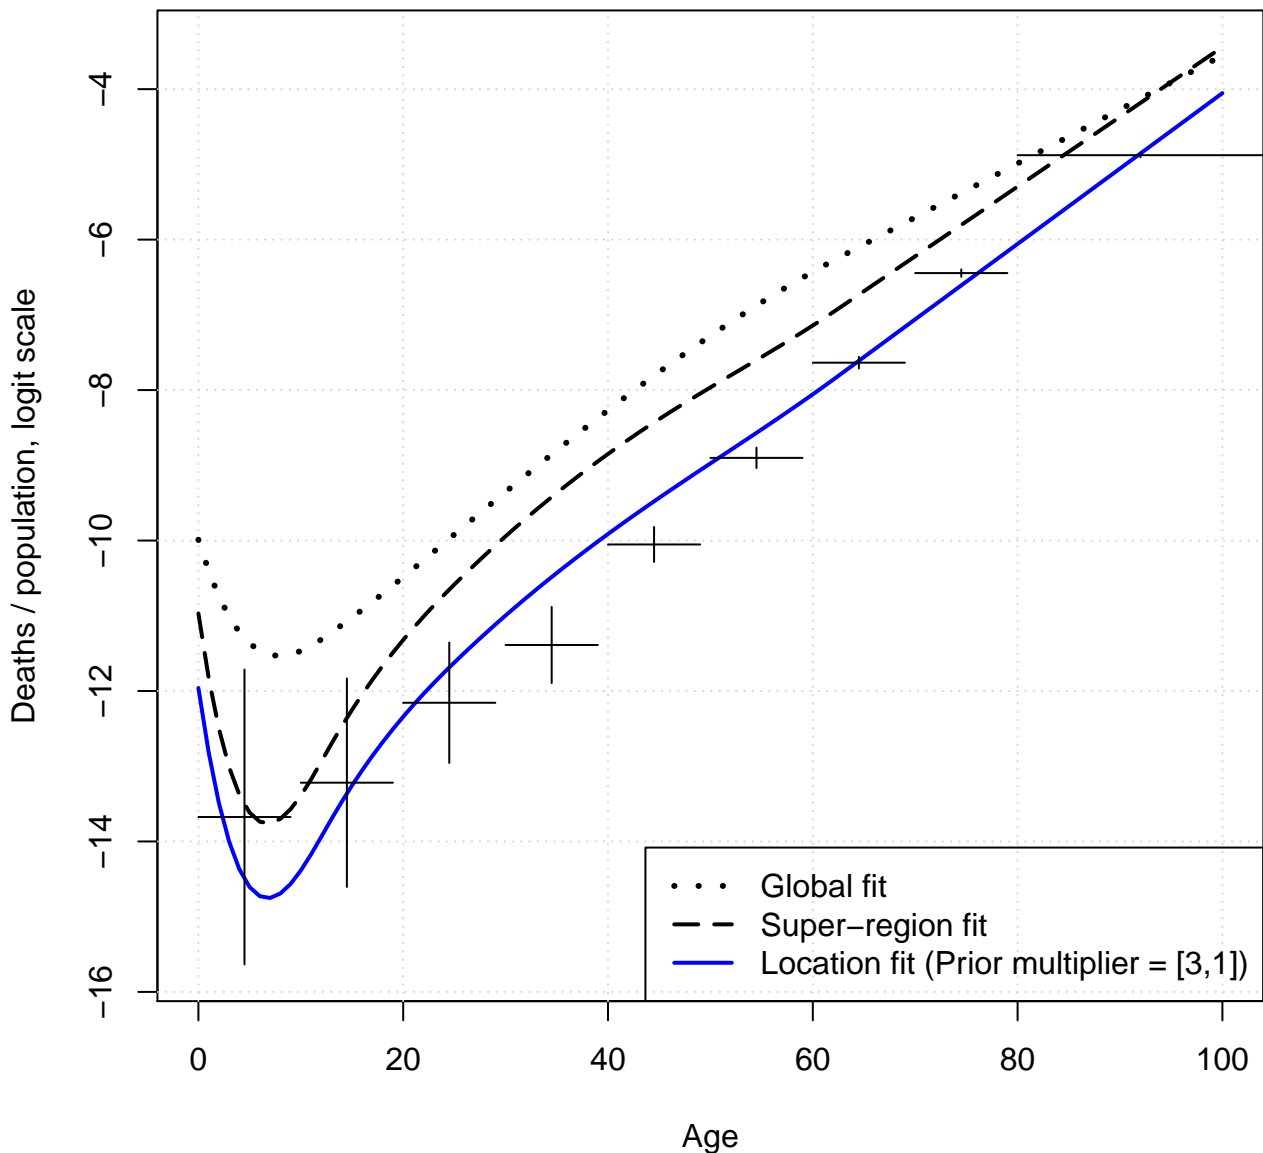

# Spain

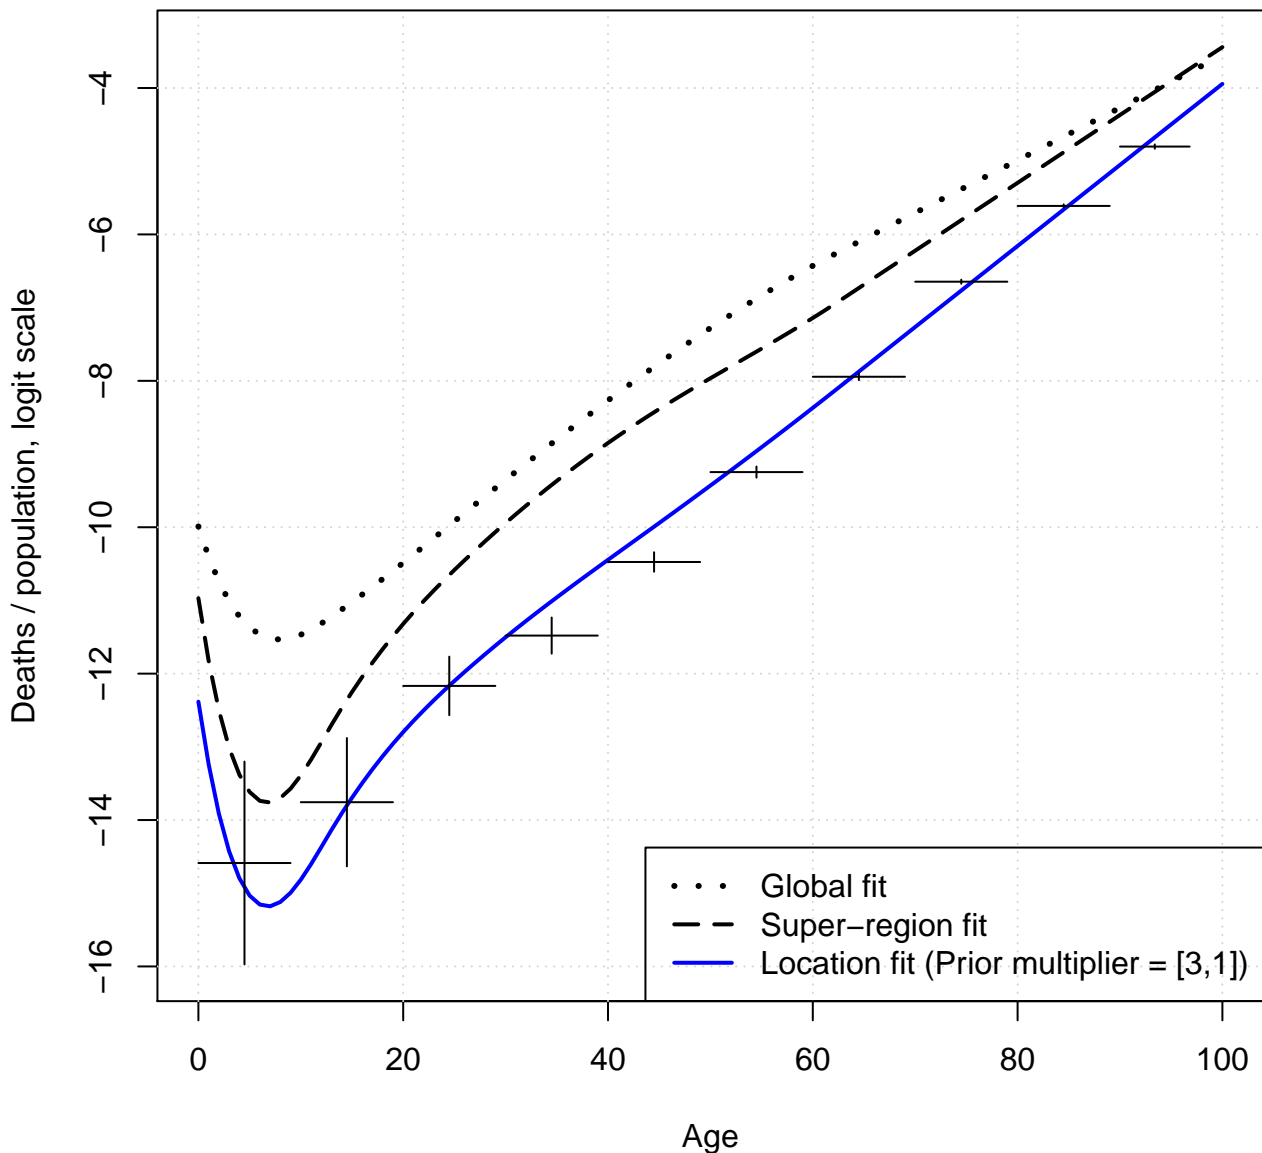



# Sweden

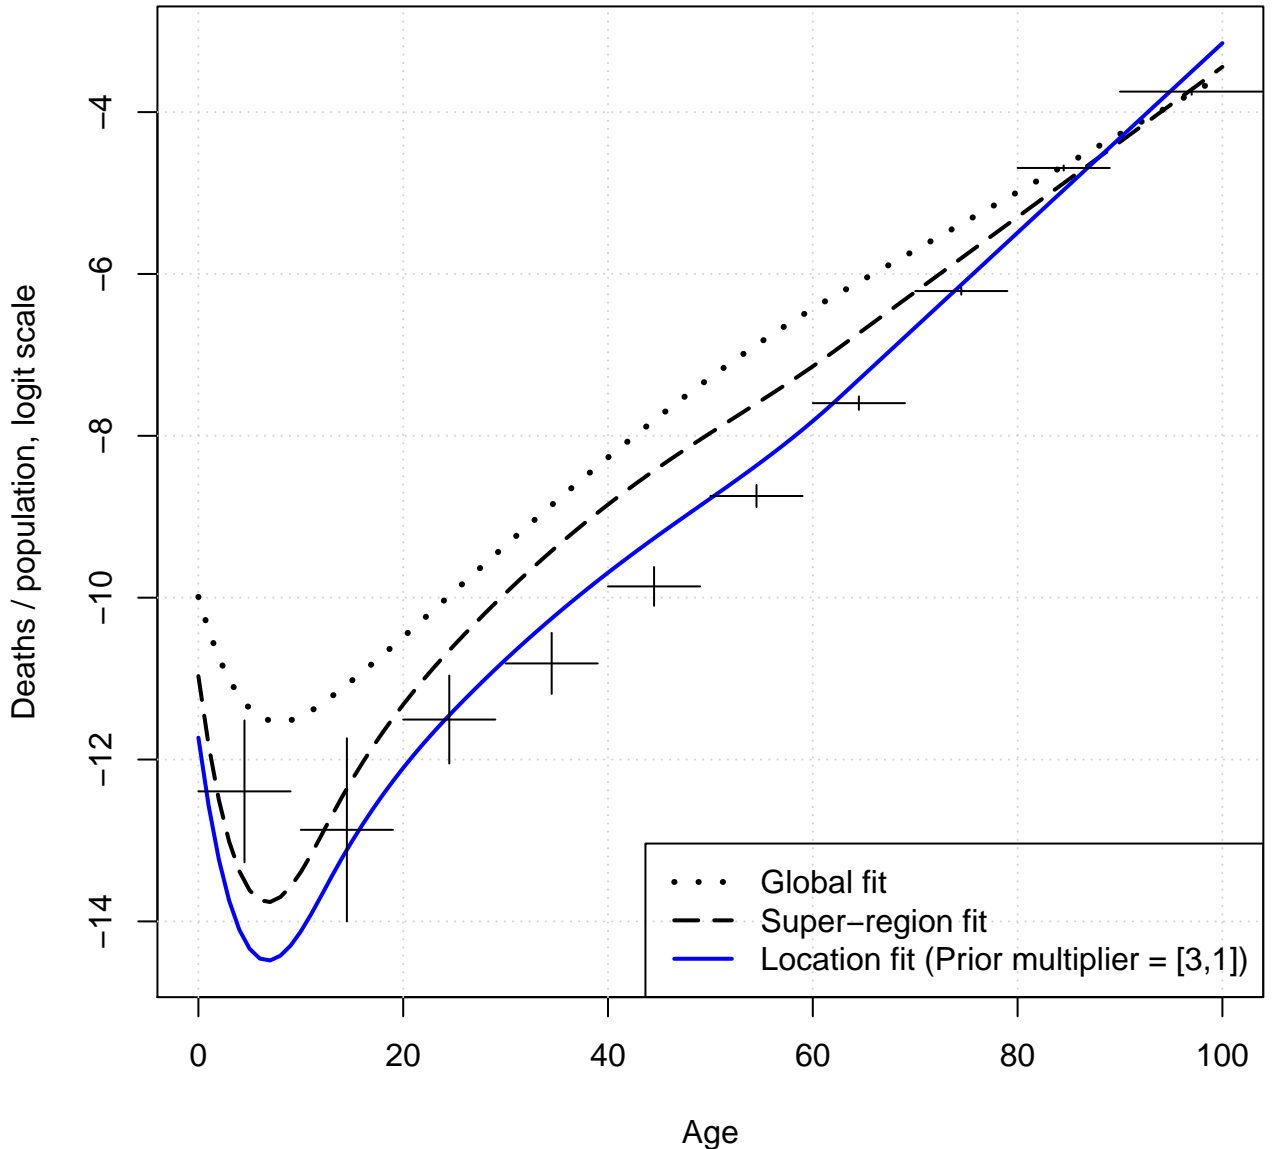

# Switzerland

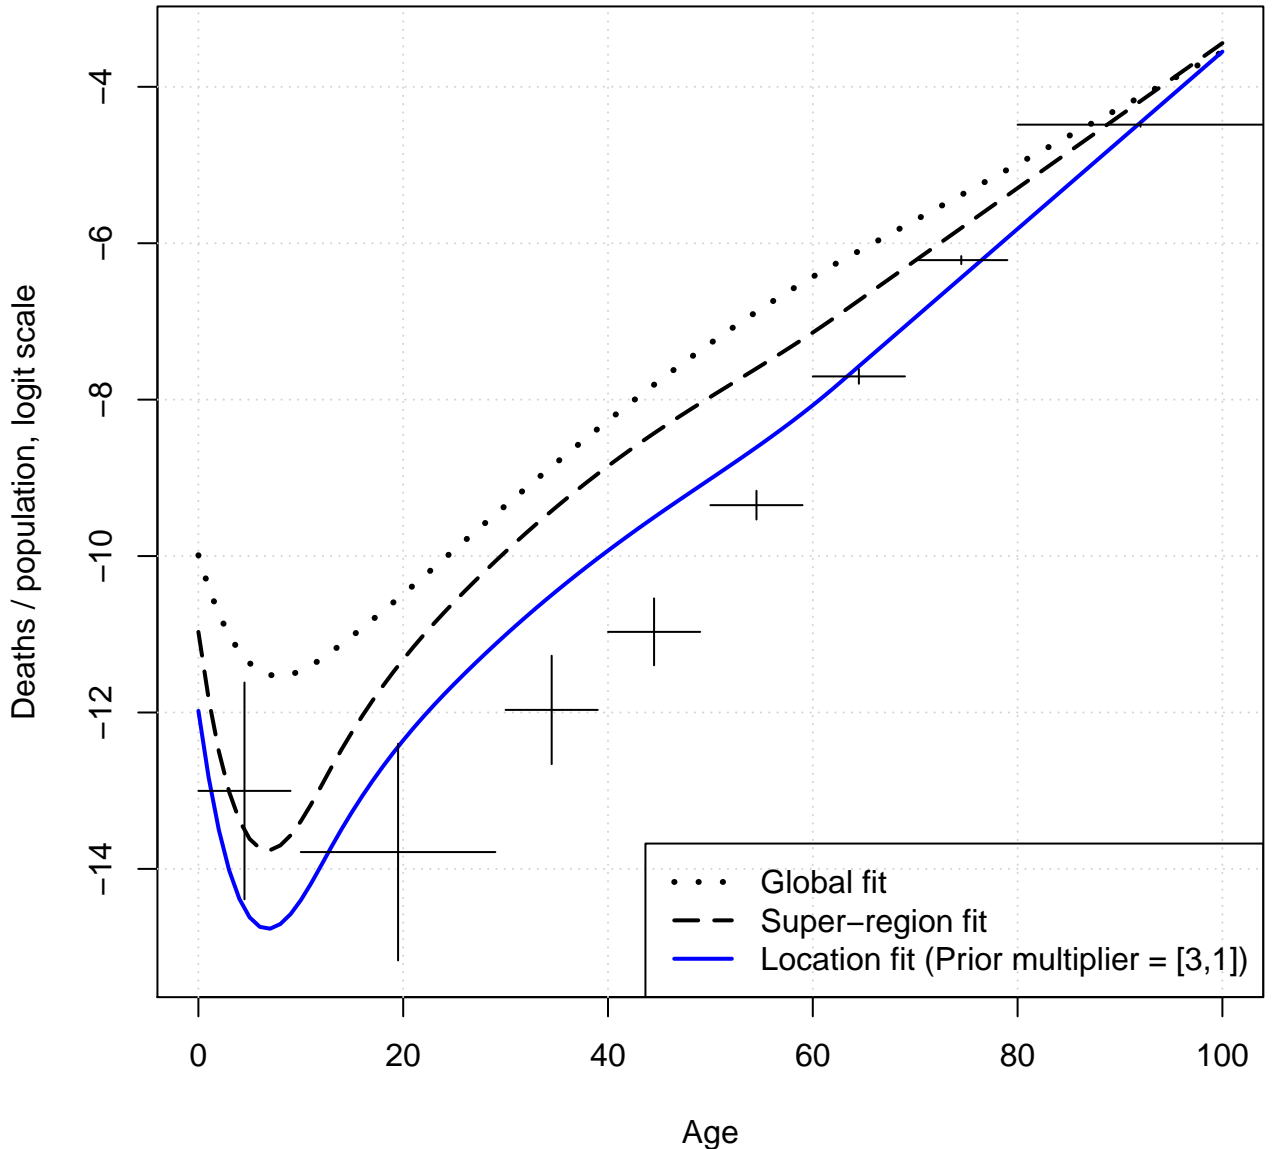

# United Kingdom

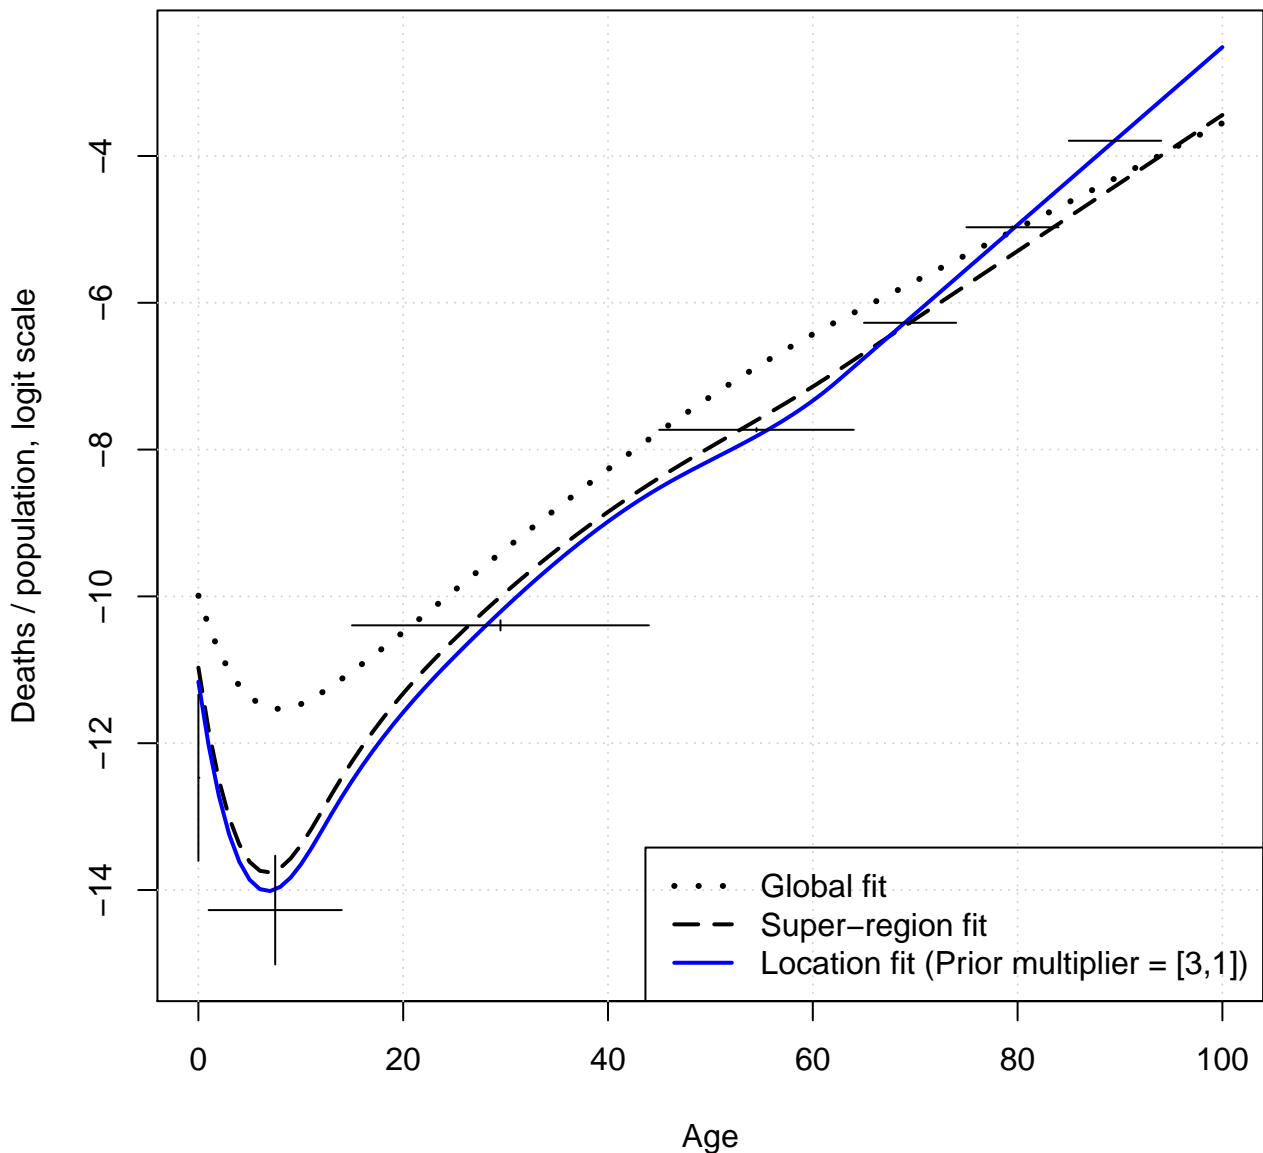

# Argentina

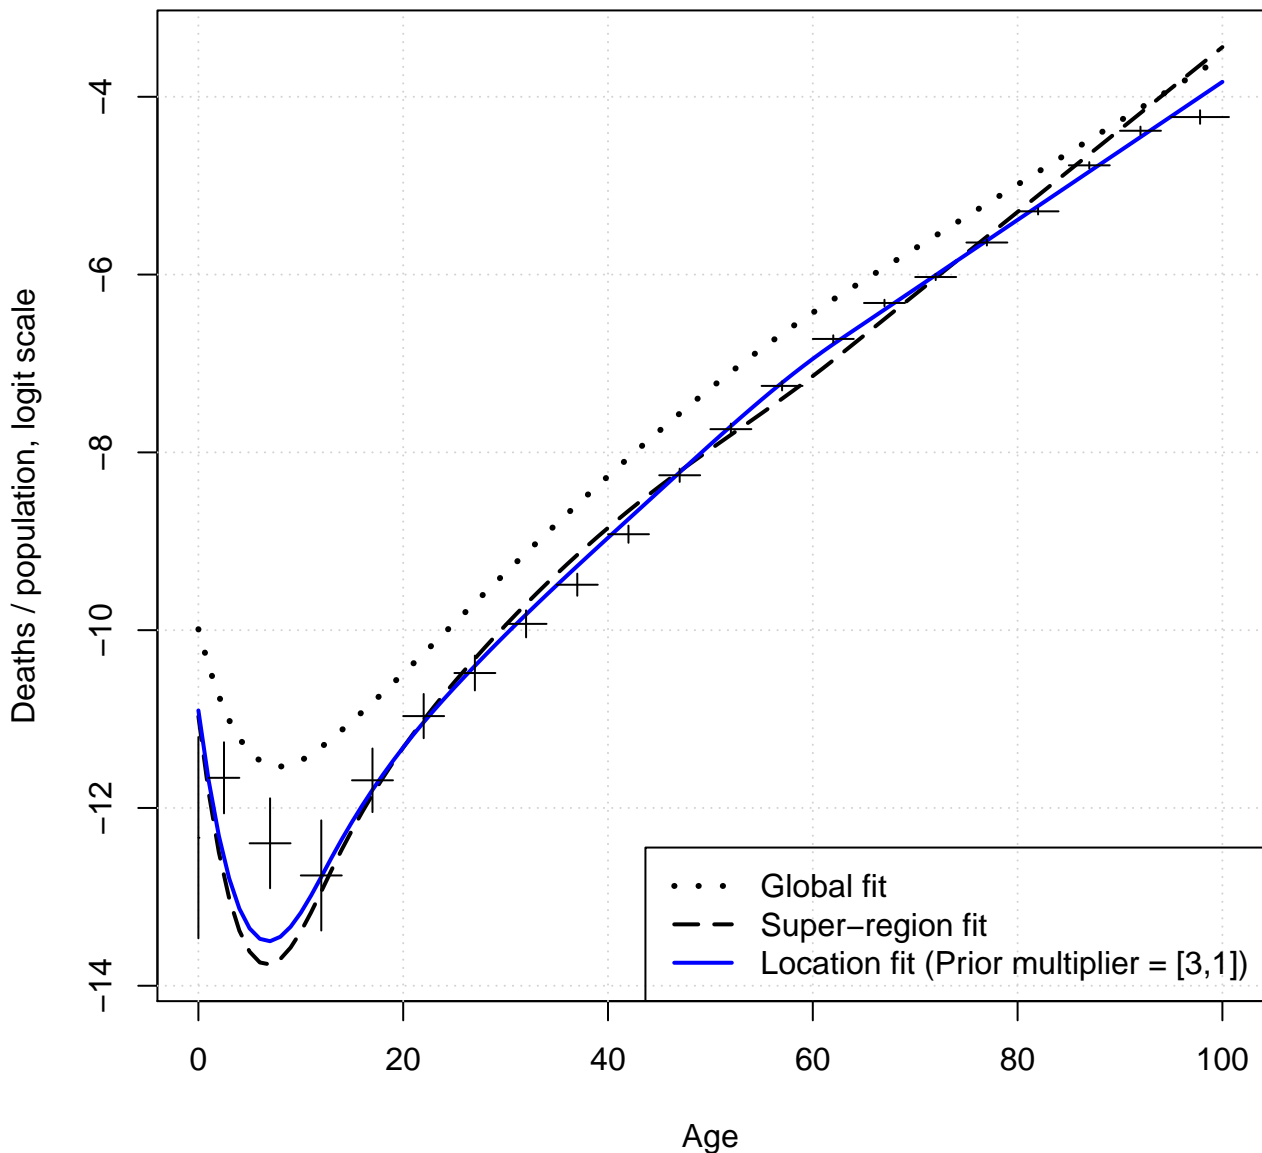

# Chile

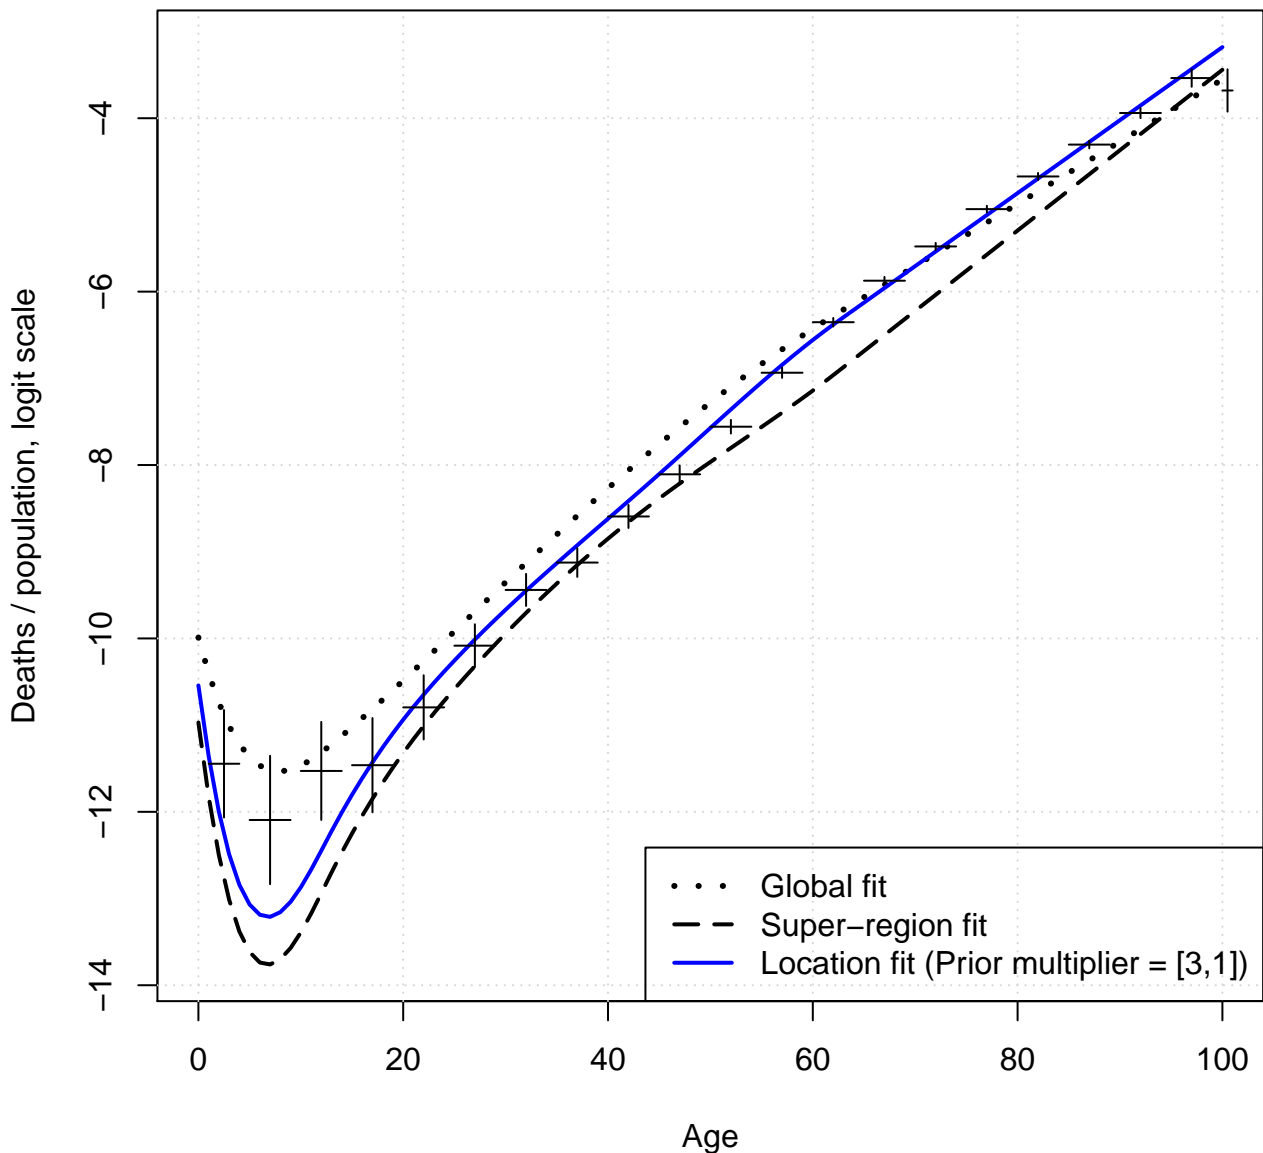

# Uruguay

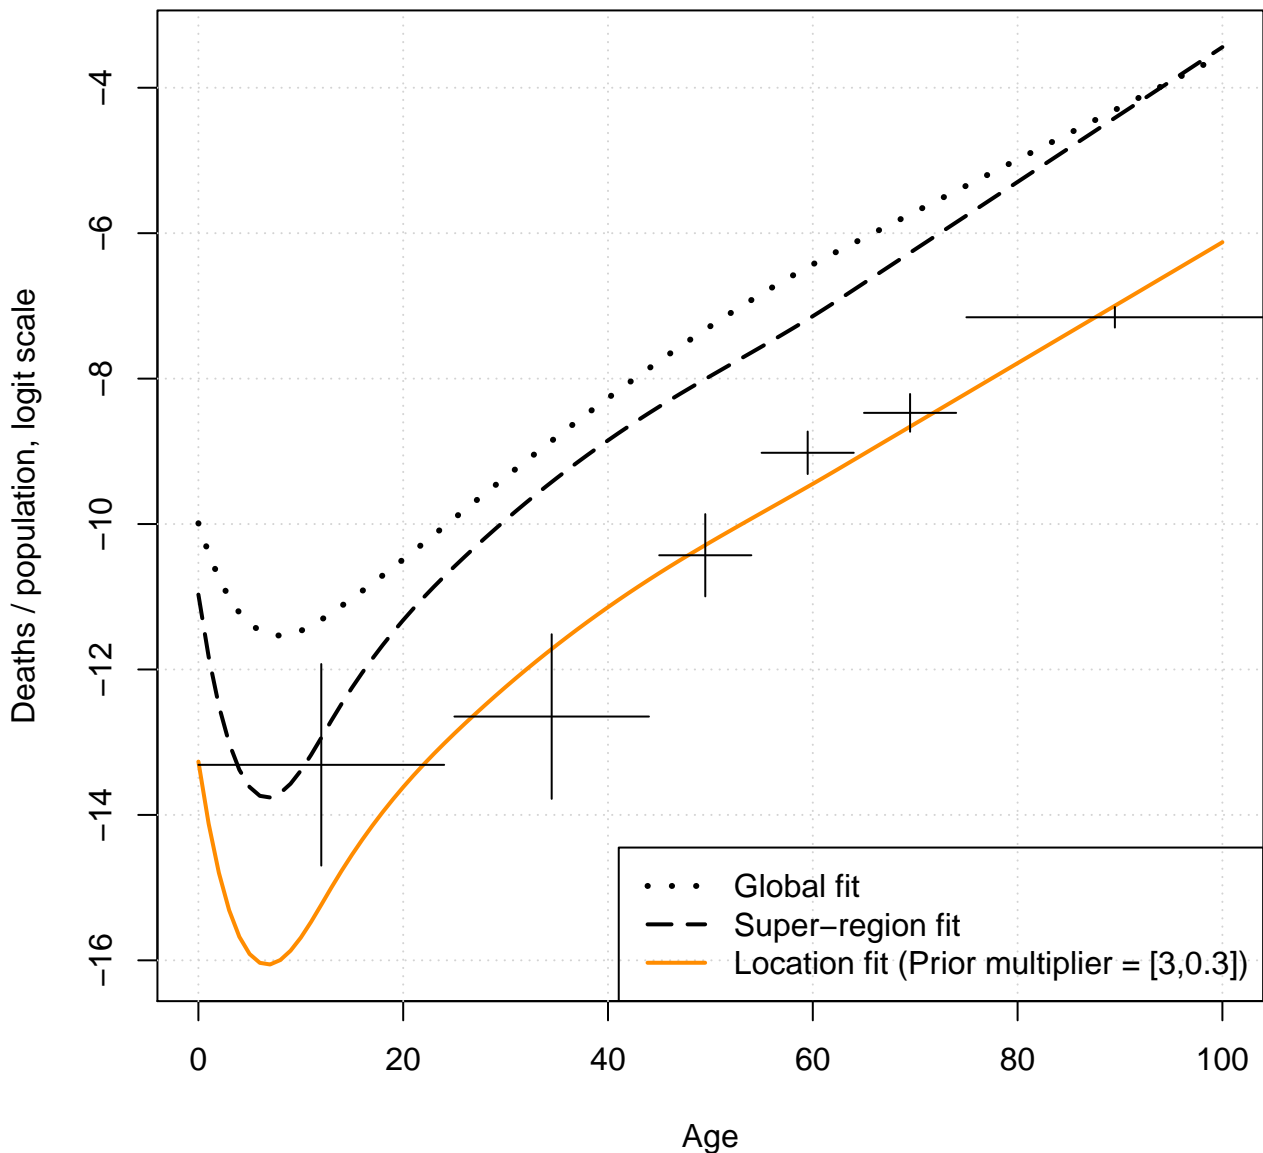

# Canada

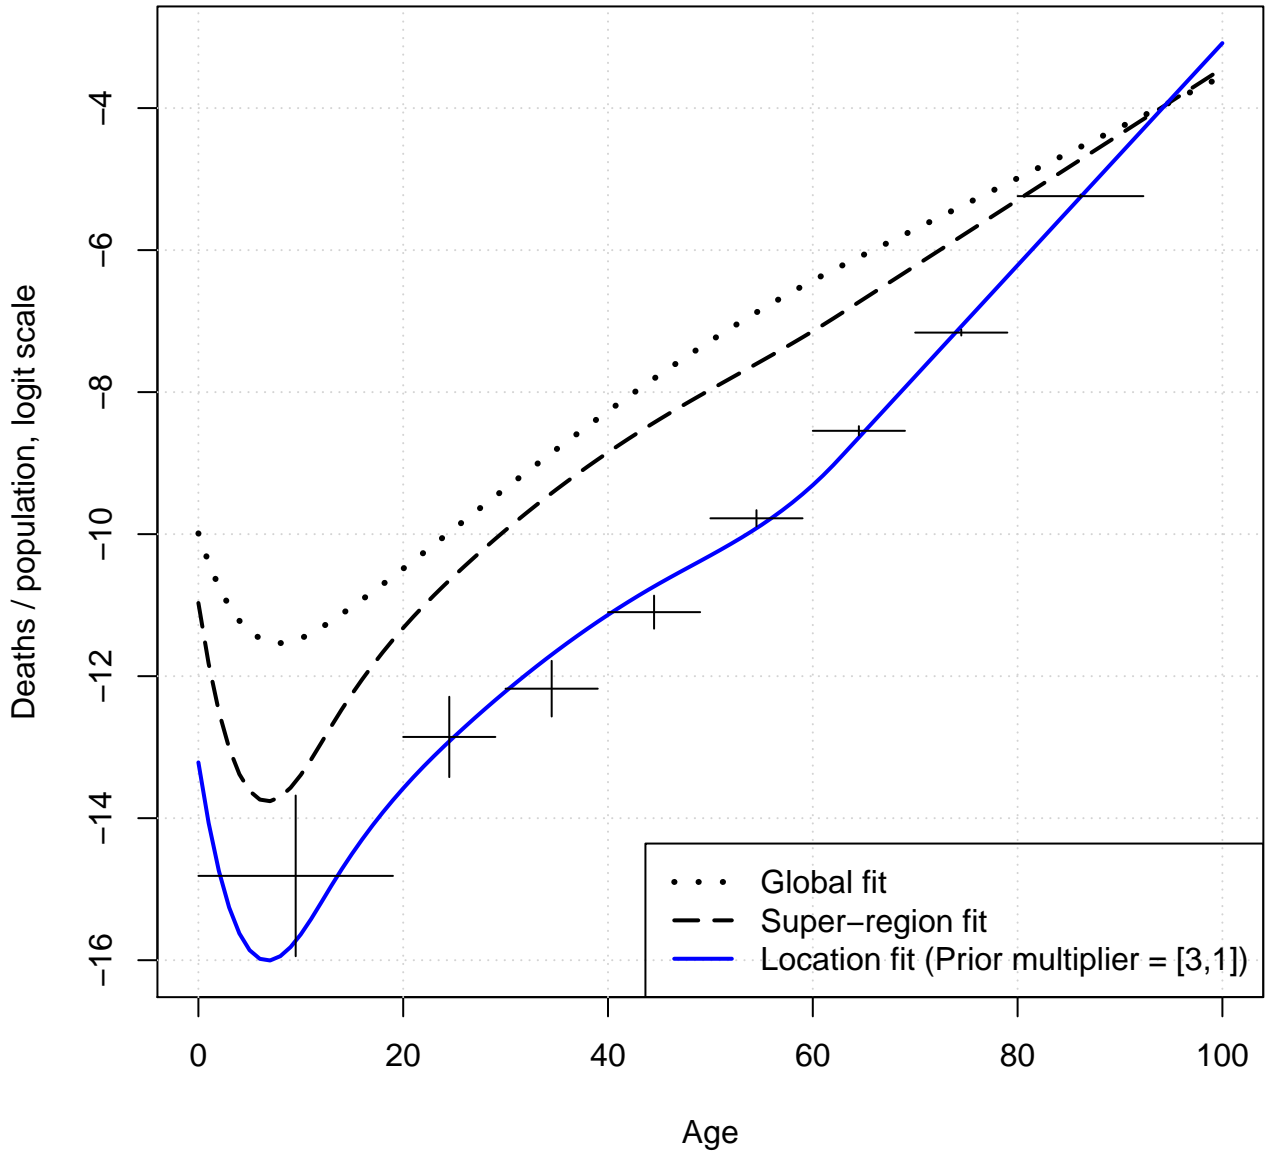

# United States

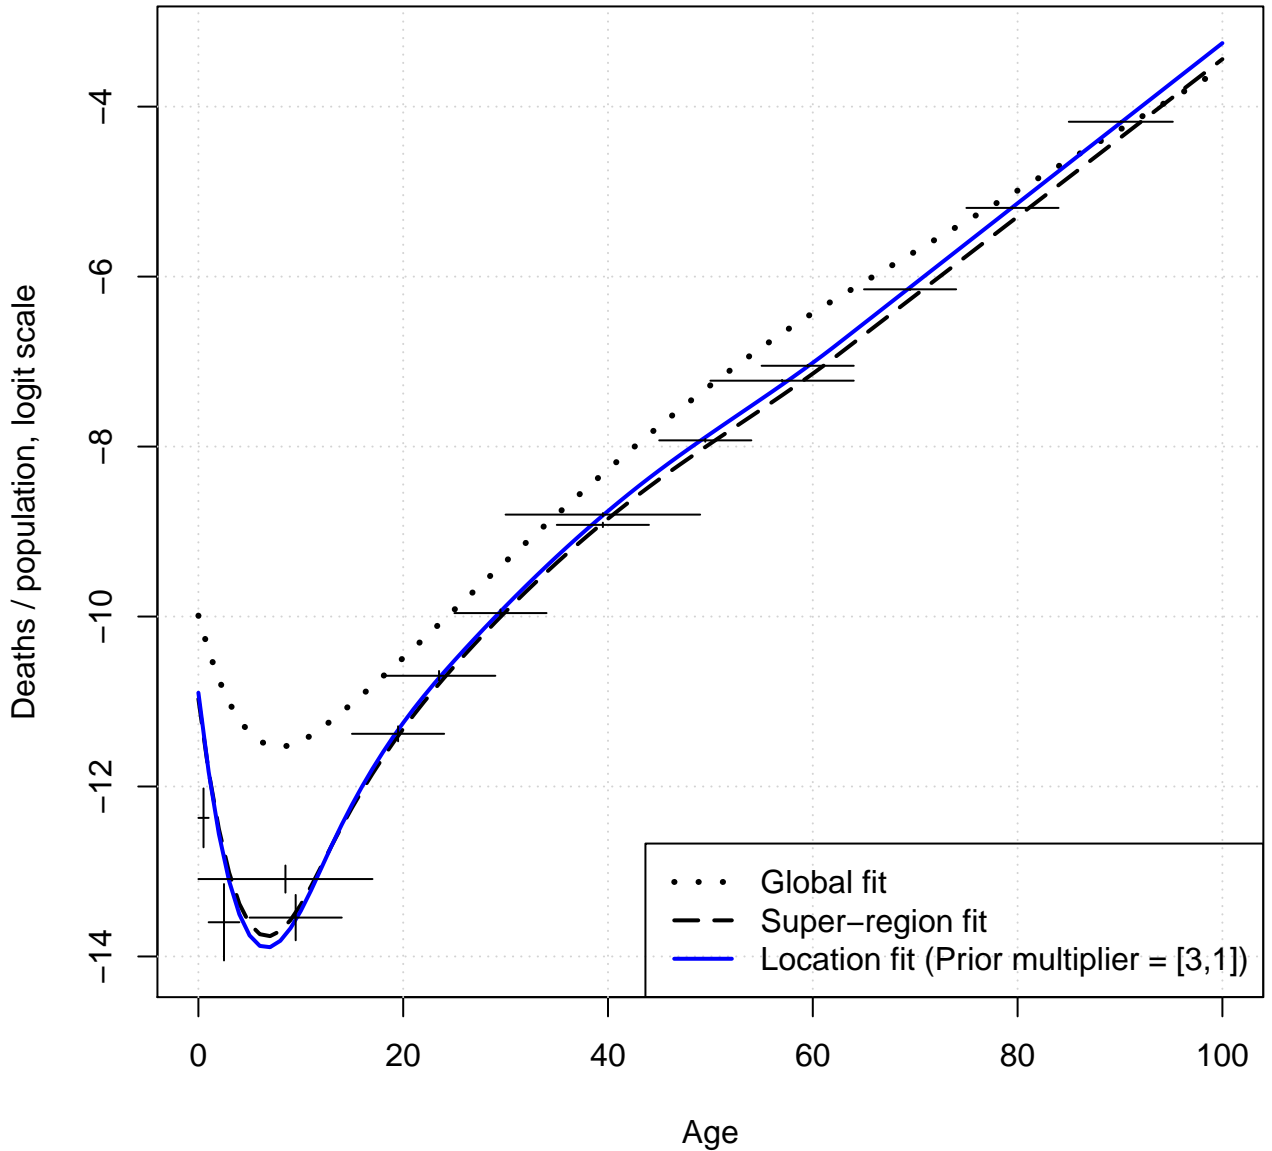



Figure S4. Age patterns of COVID-19 mortality for select countries and territories in Latin America and the Caribbean

## Haiti

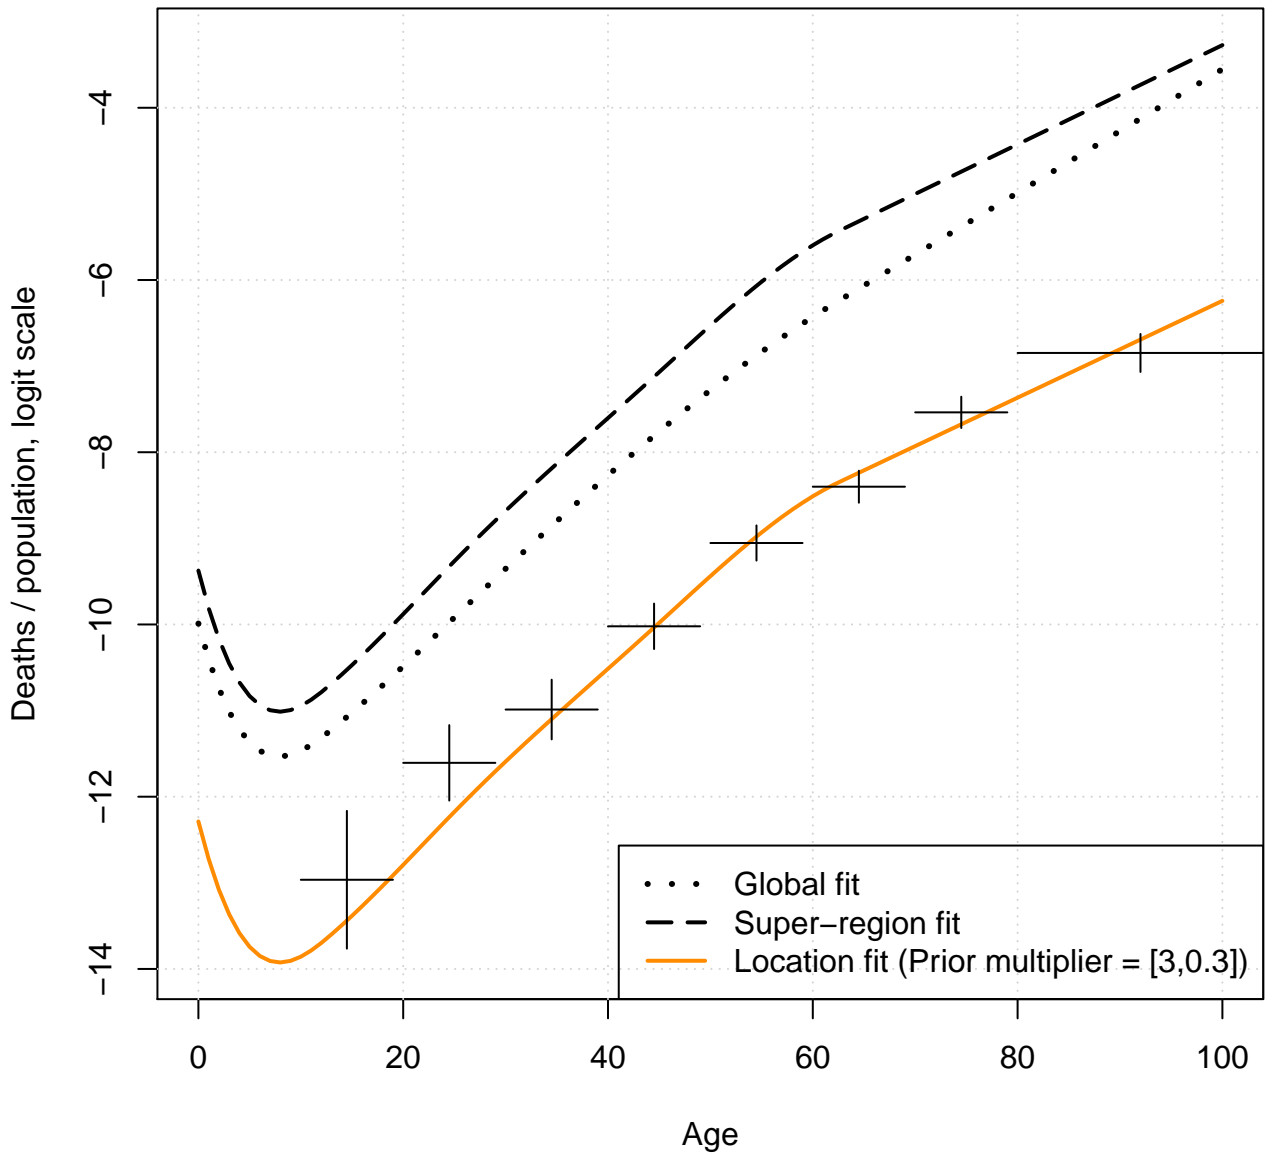

# Jamaica

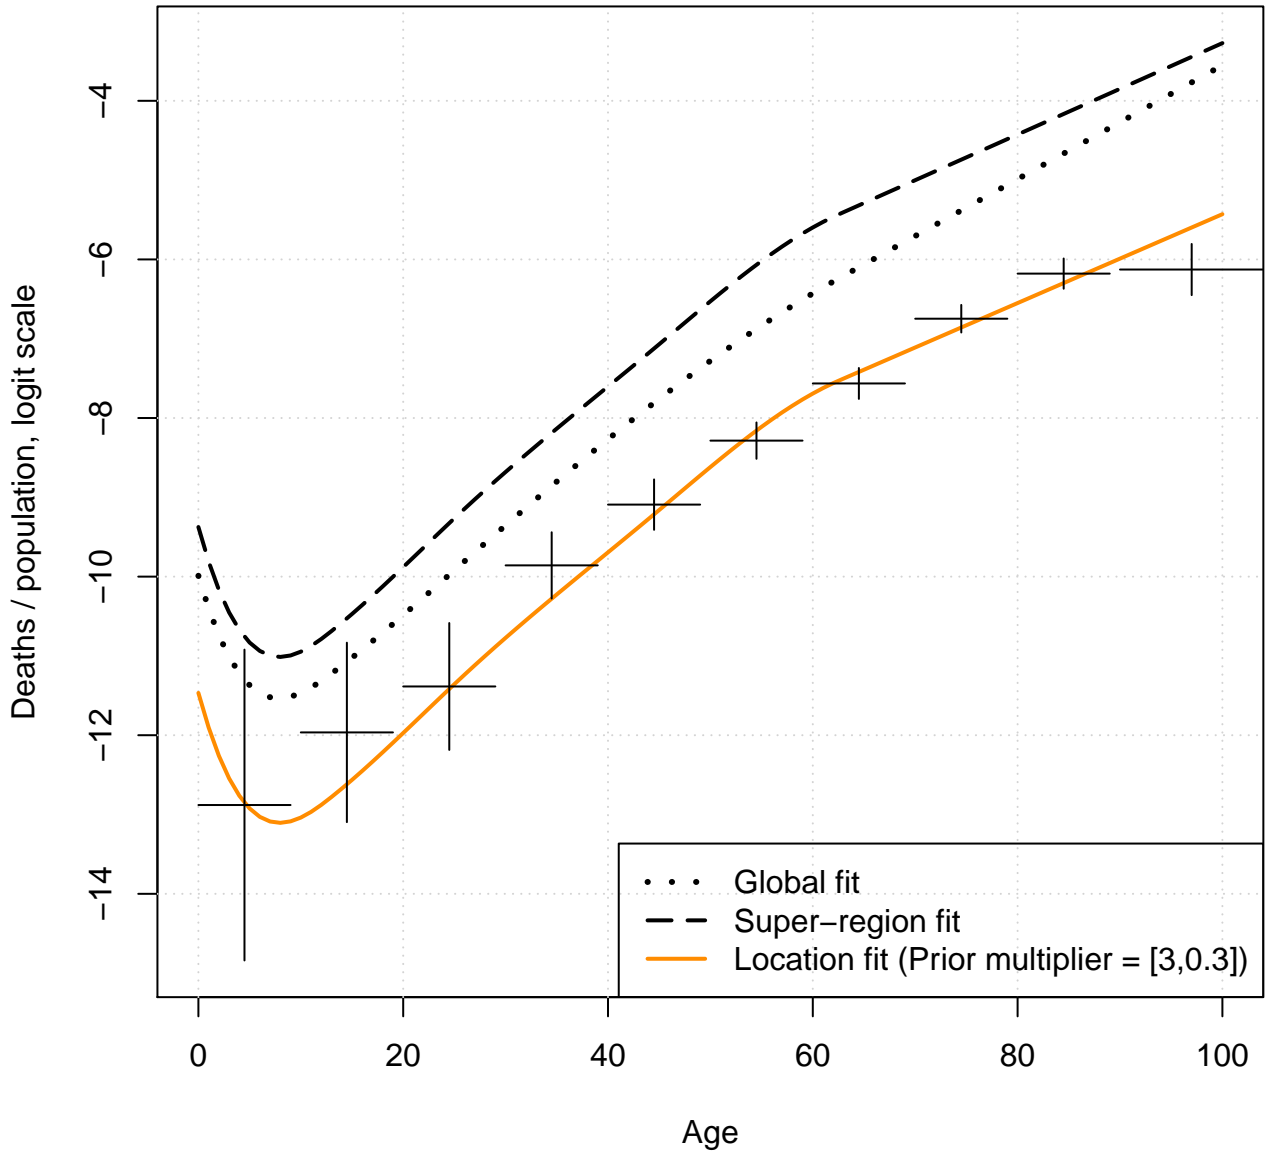

# Suriname

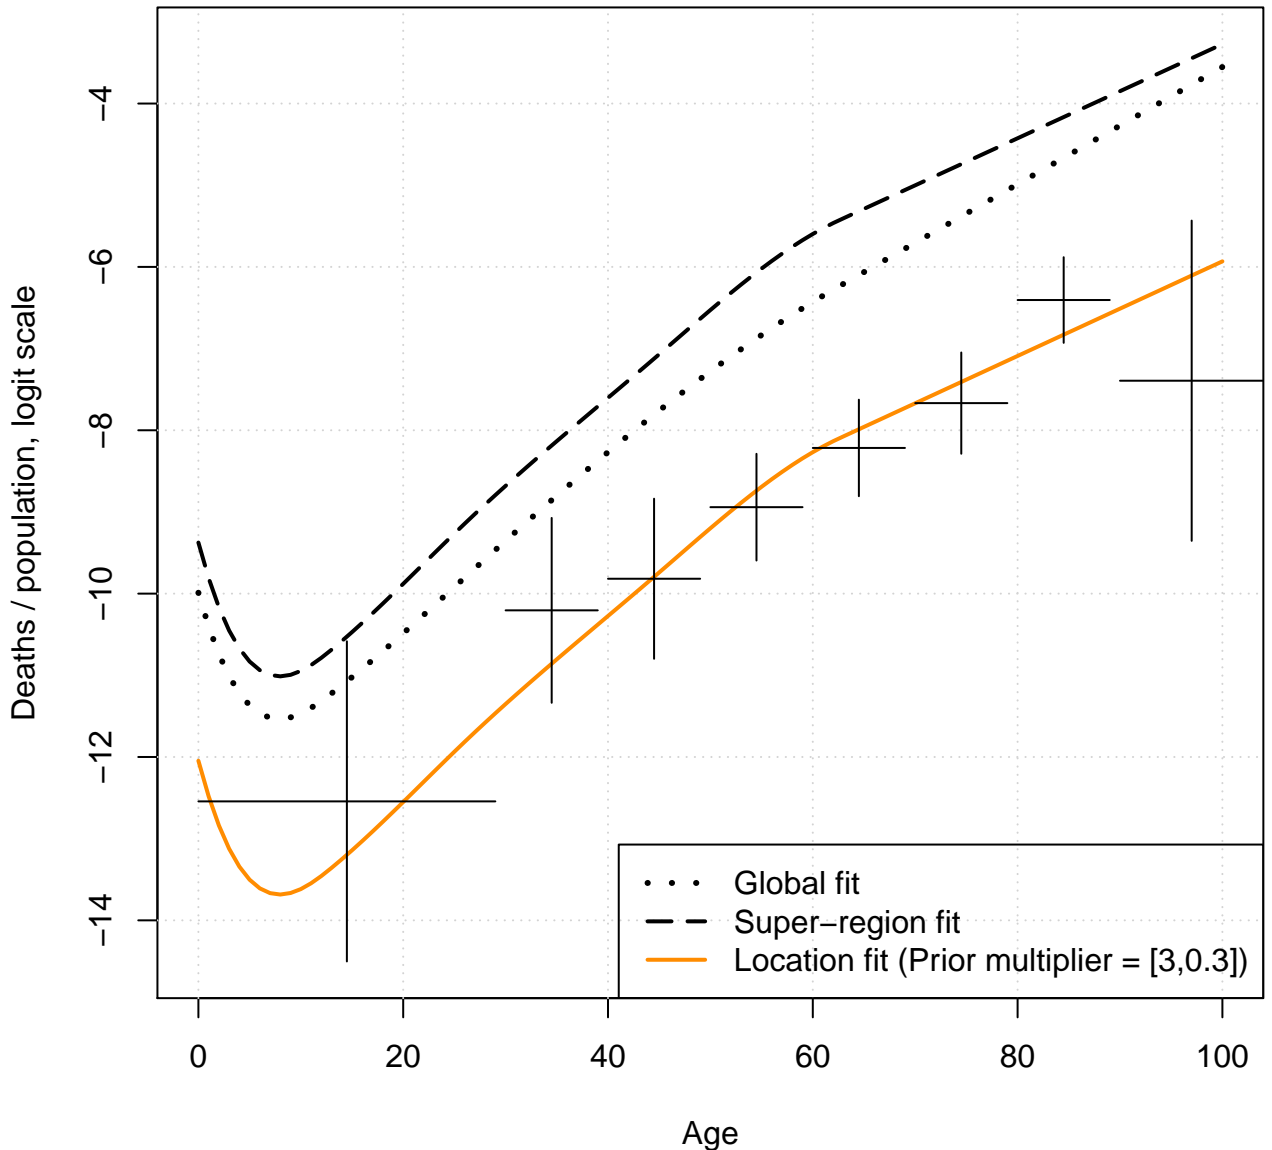

# Ecuador

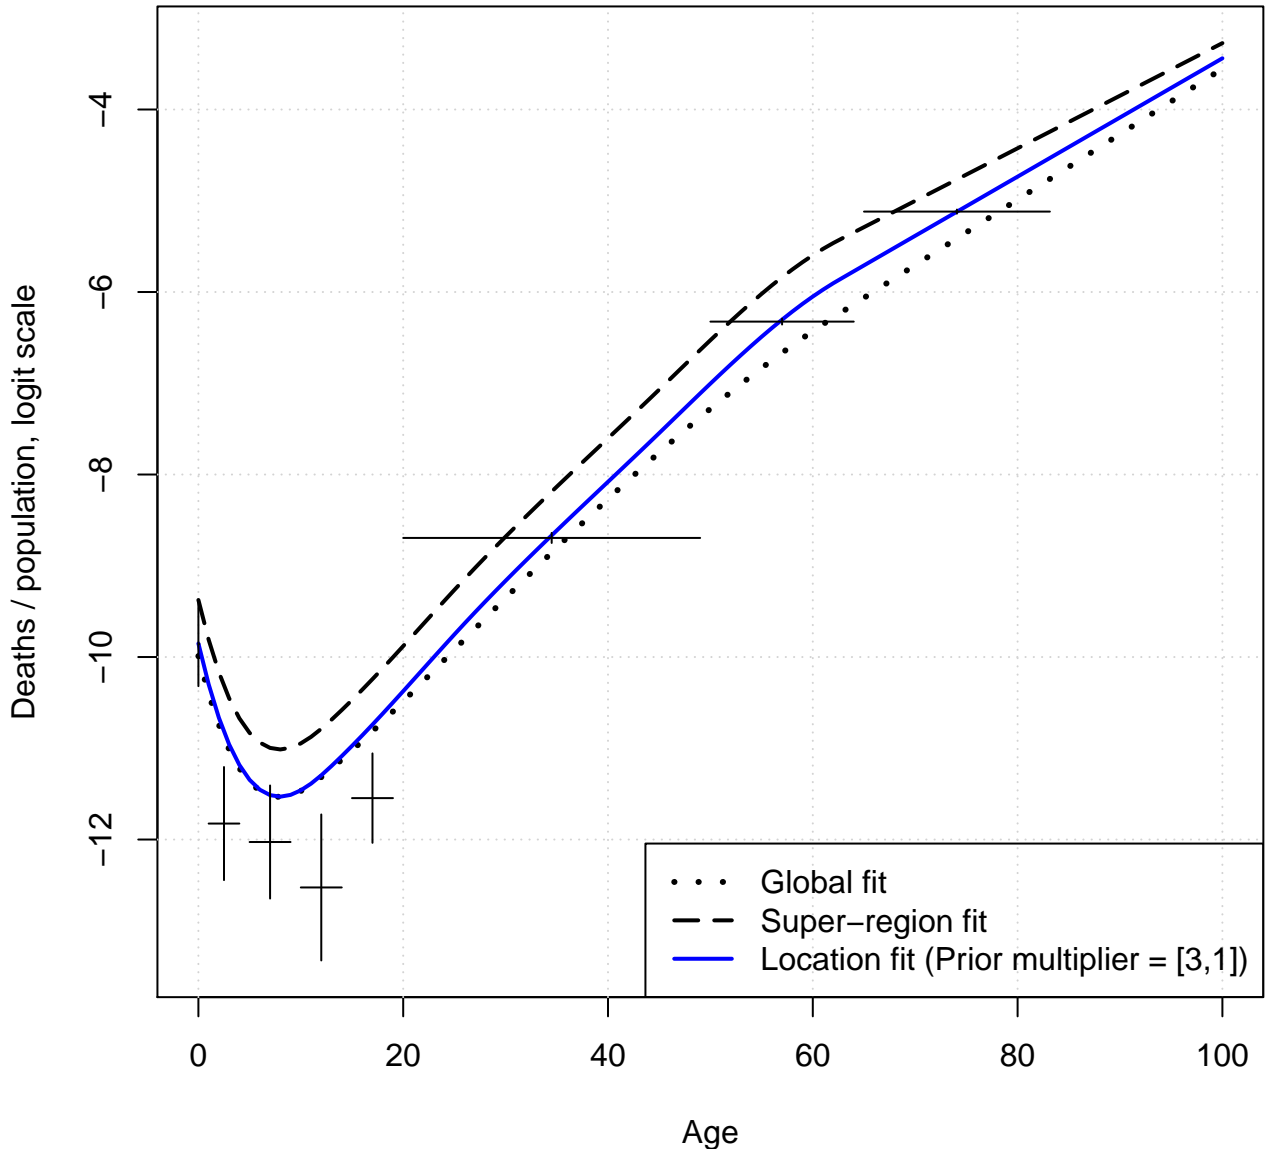

# Peru

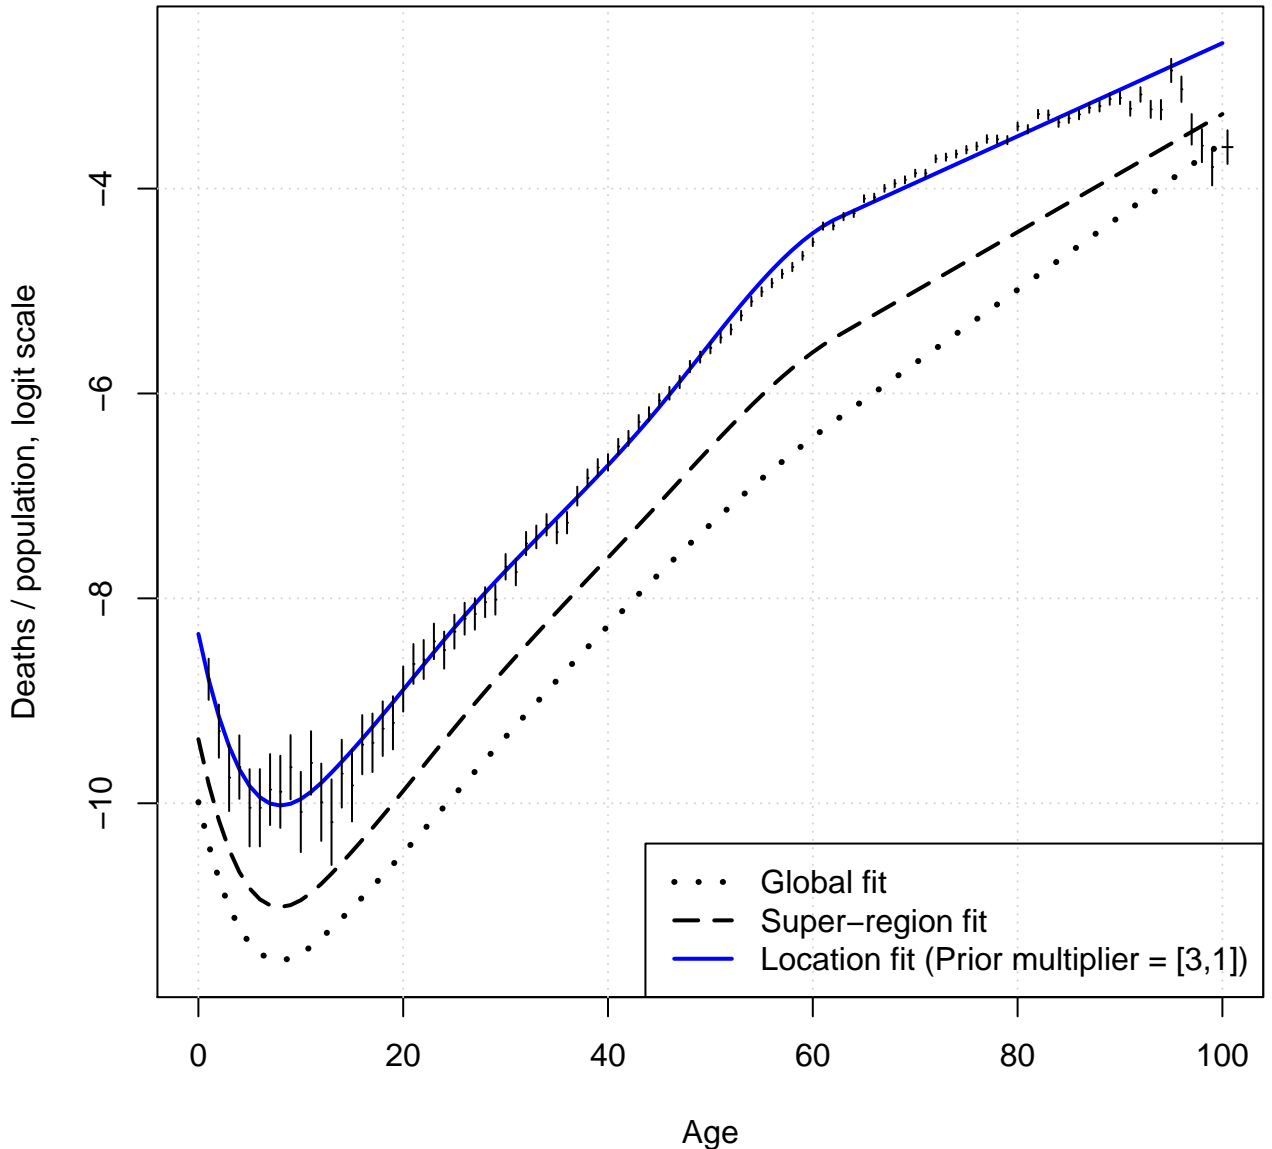

# Colombia

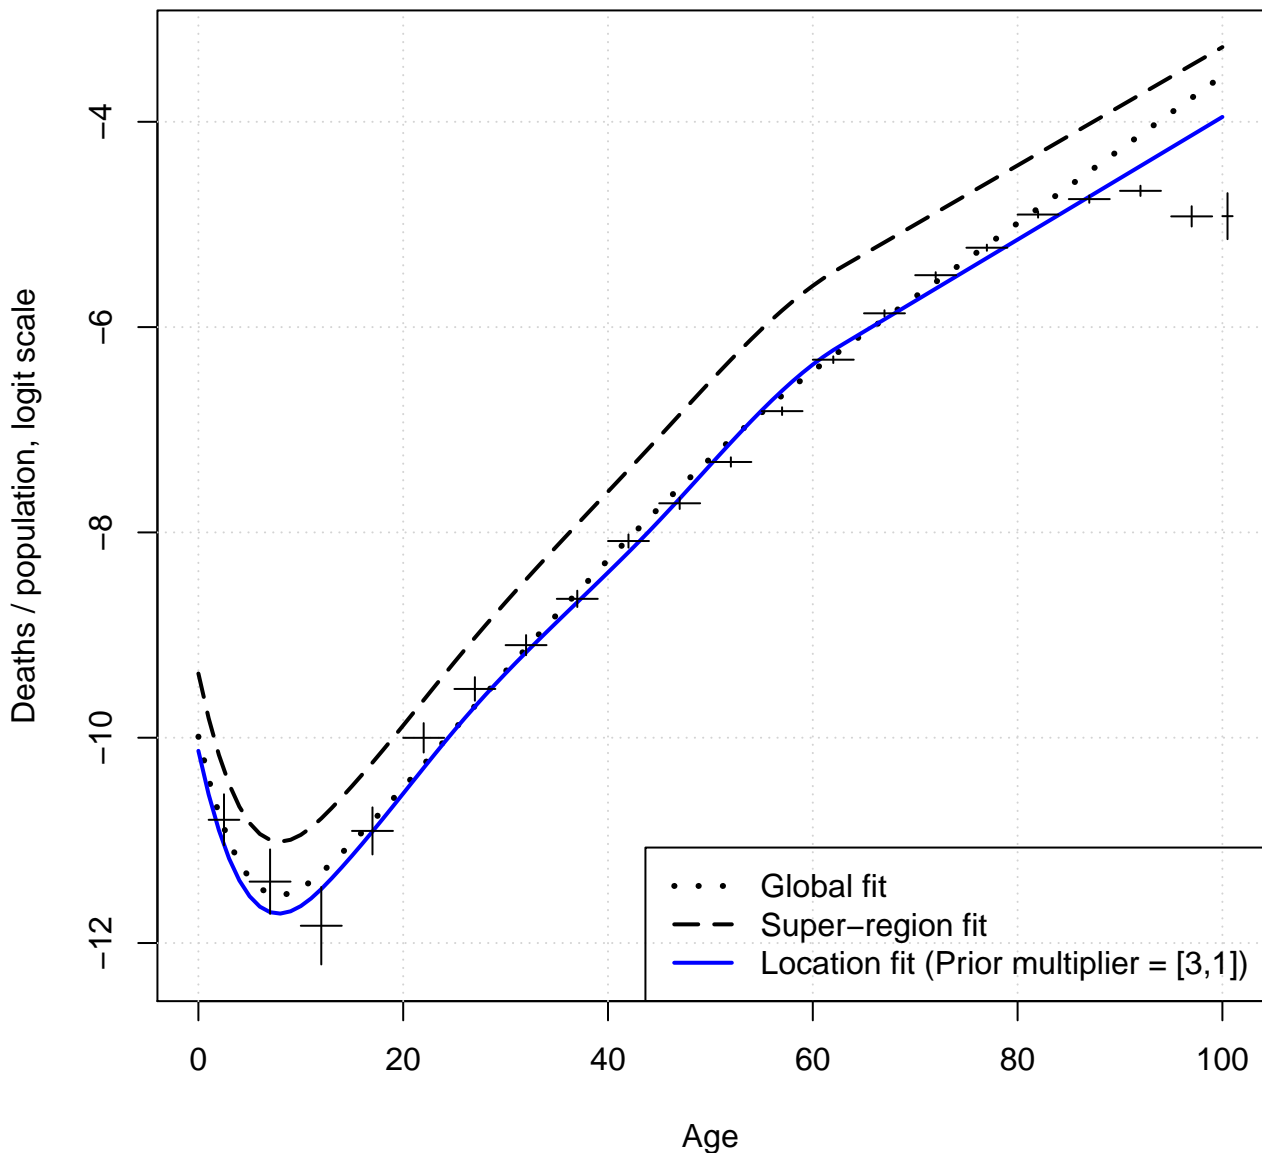

# Costa Rica

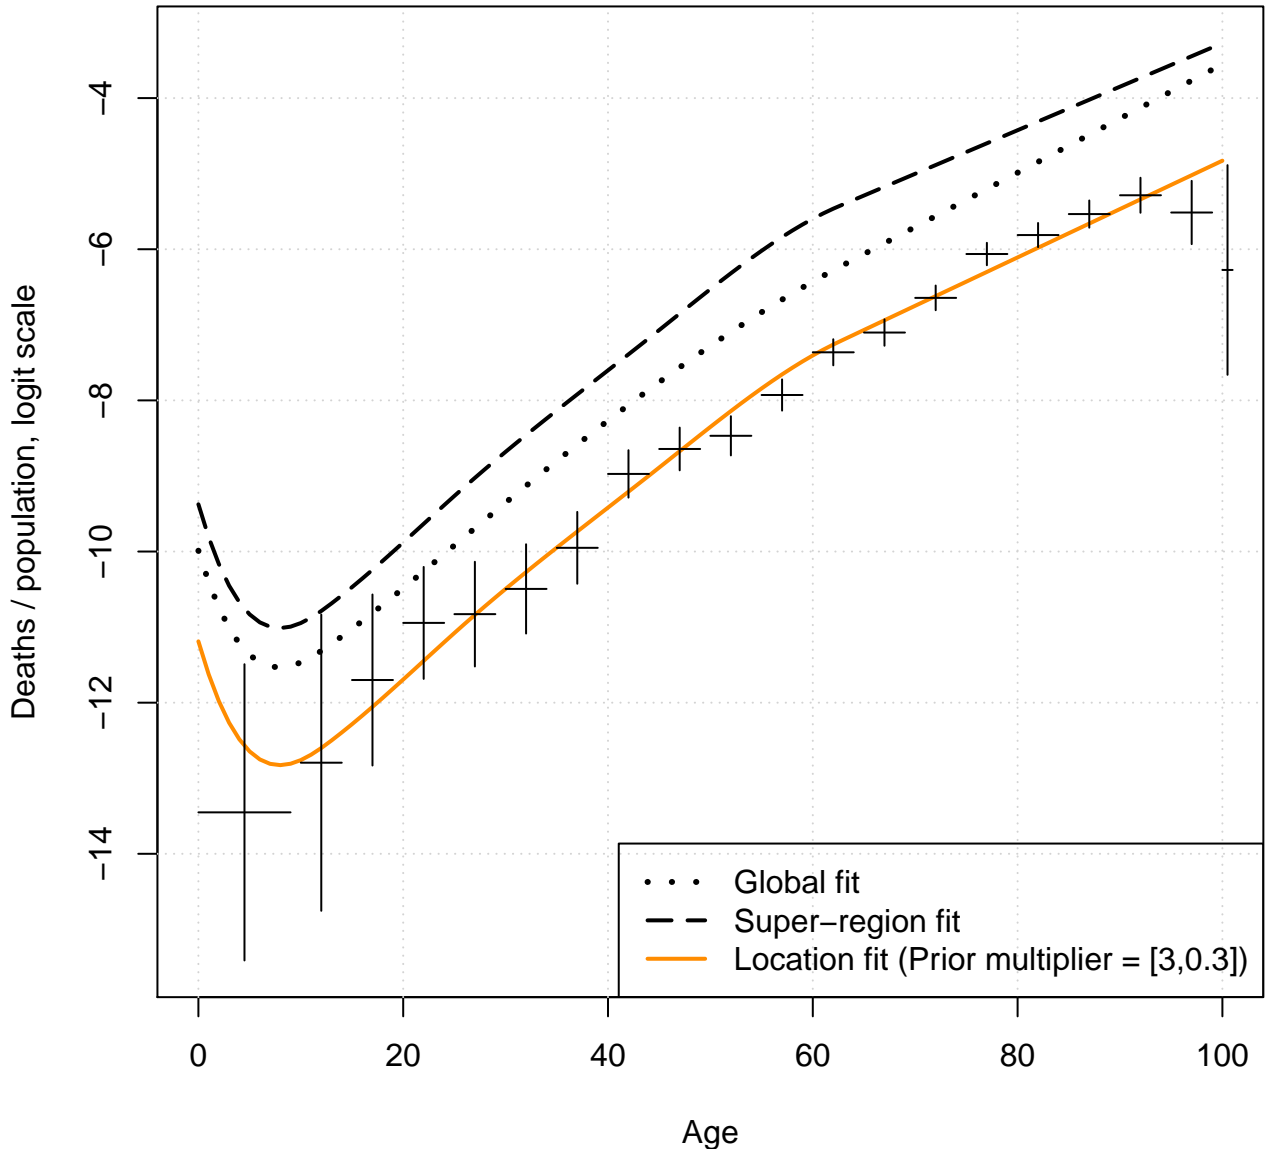

# Guatemala

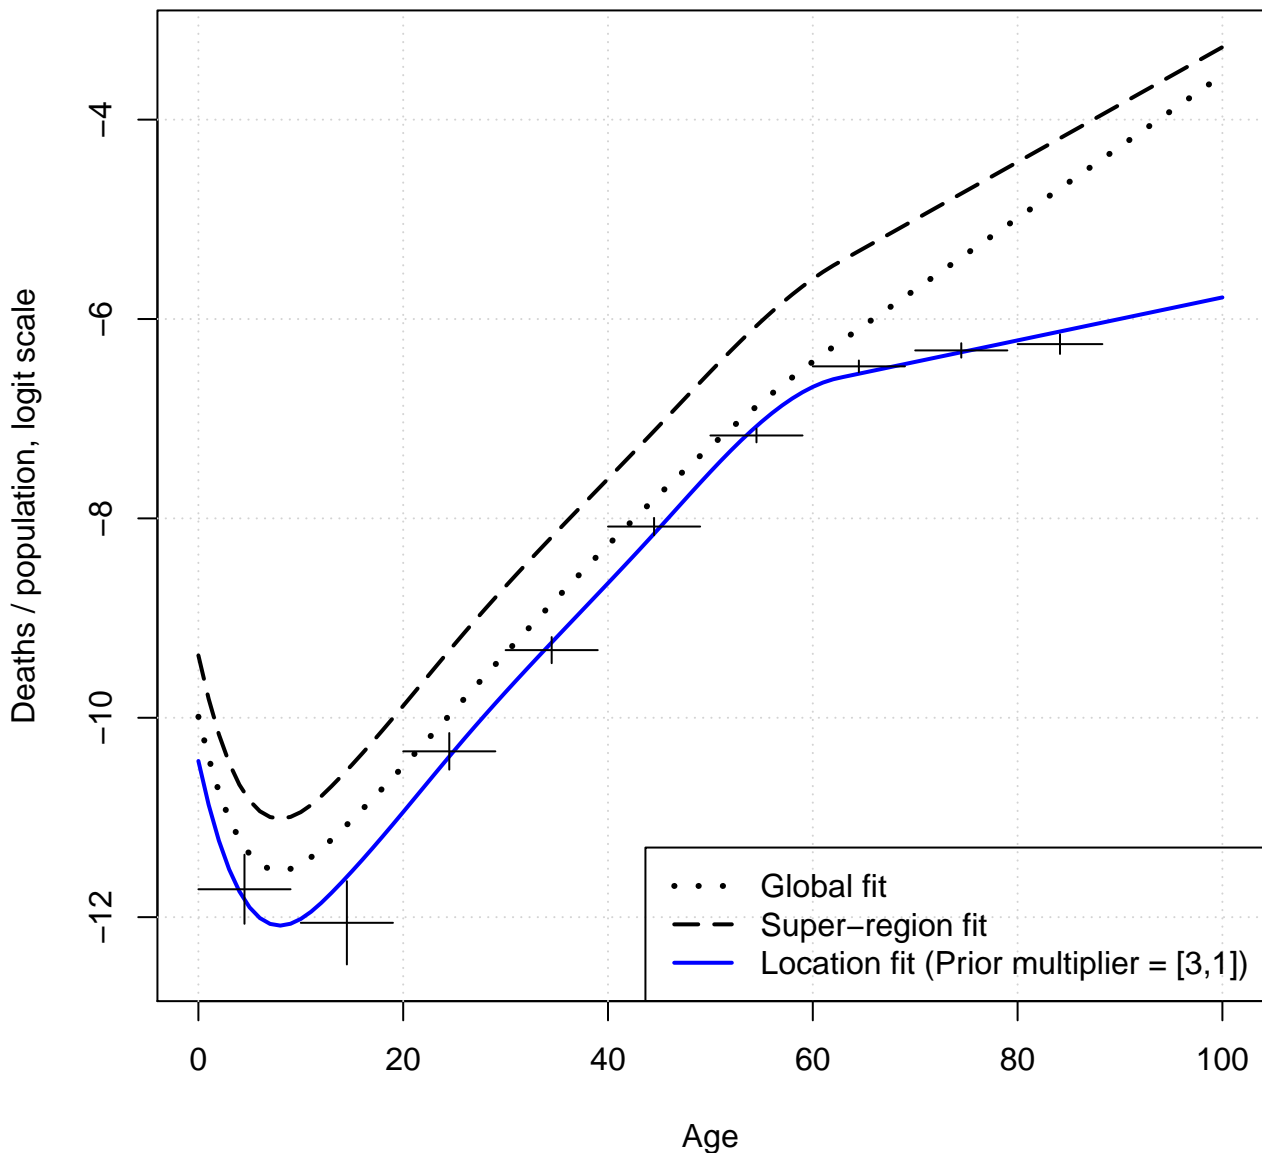



# Mexico

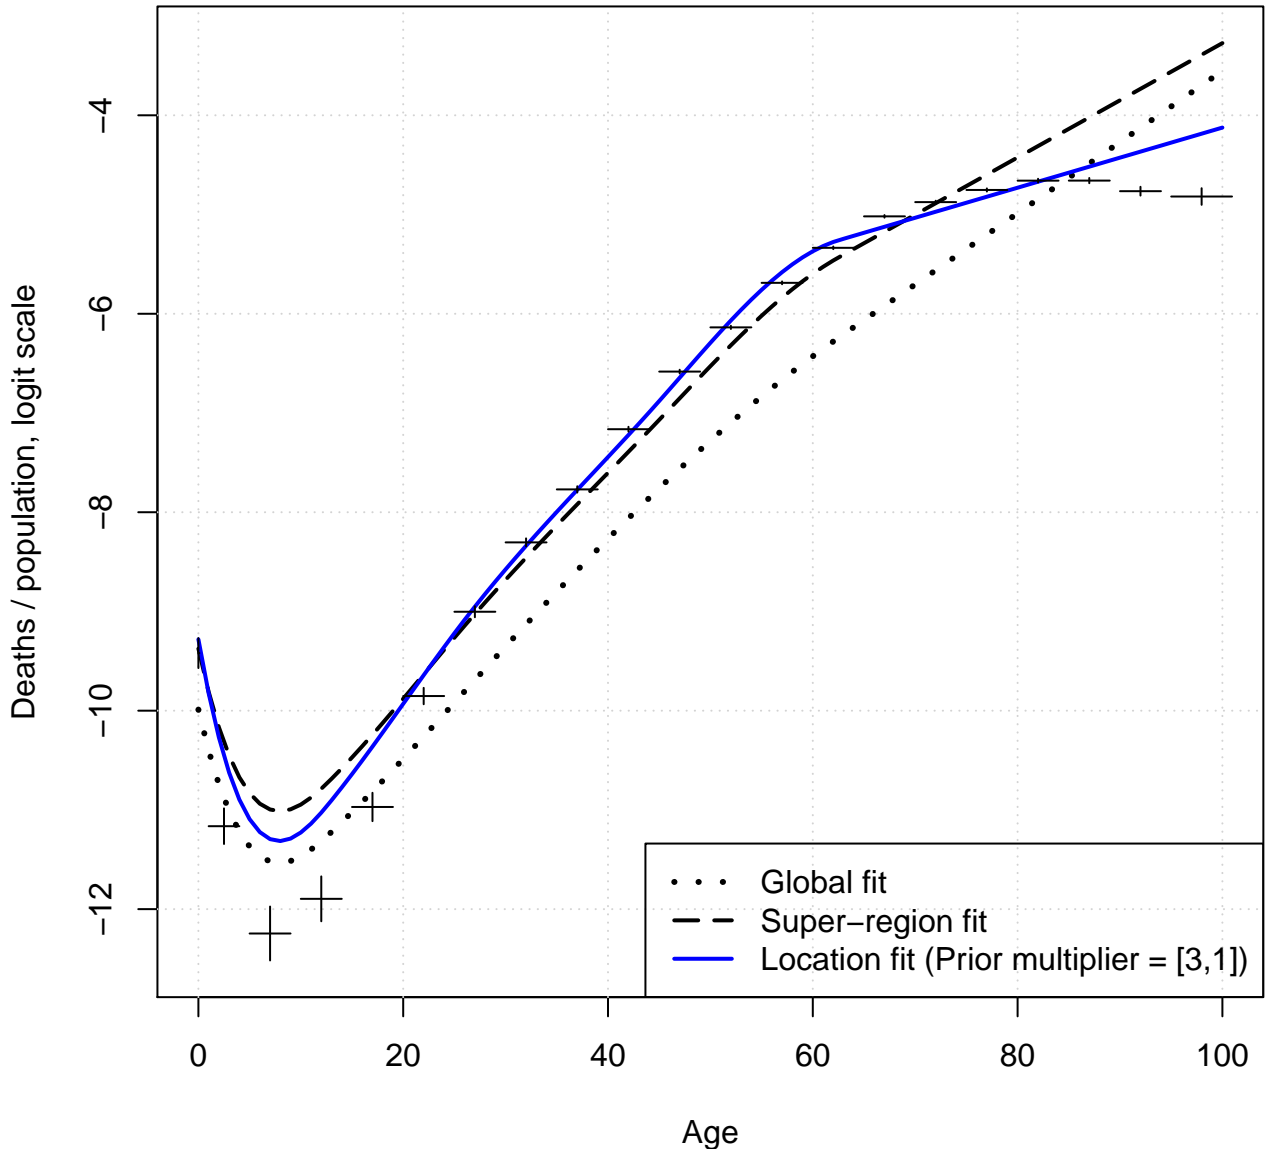

# Nicaragua

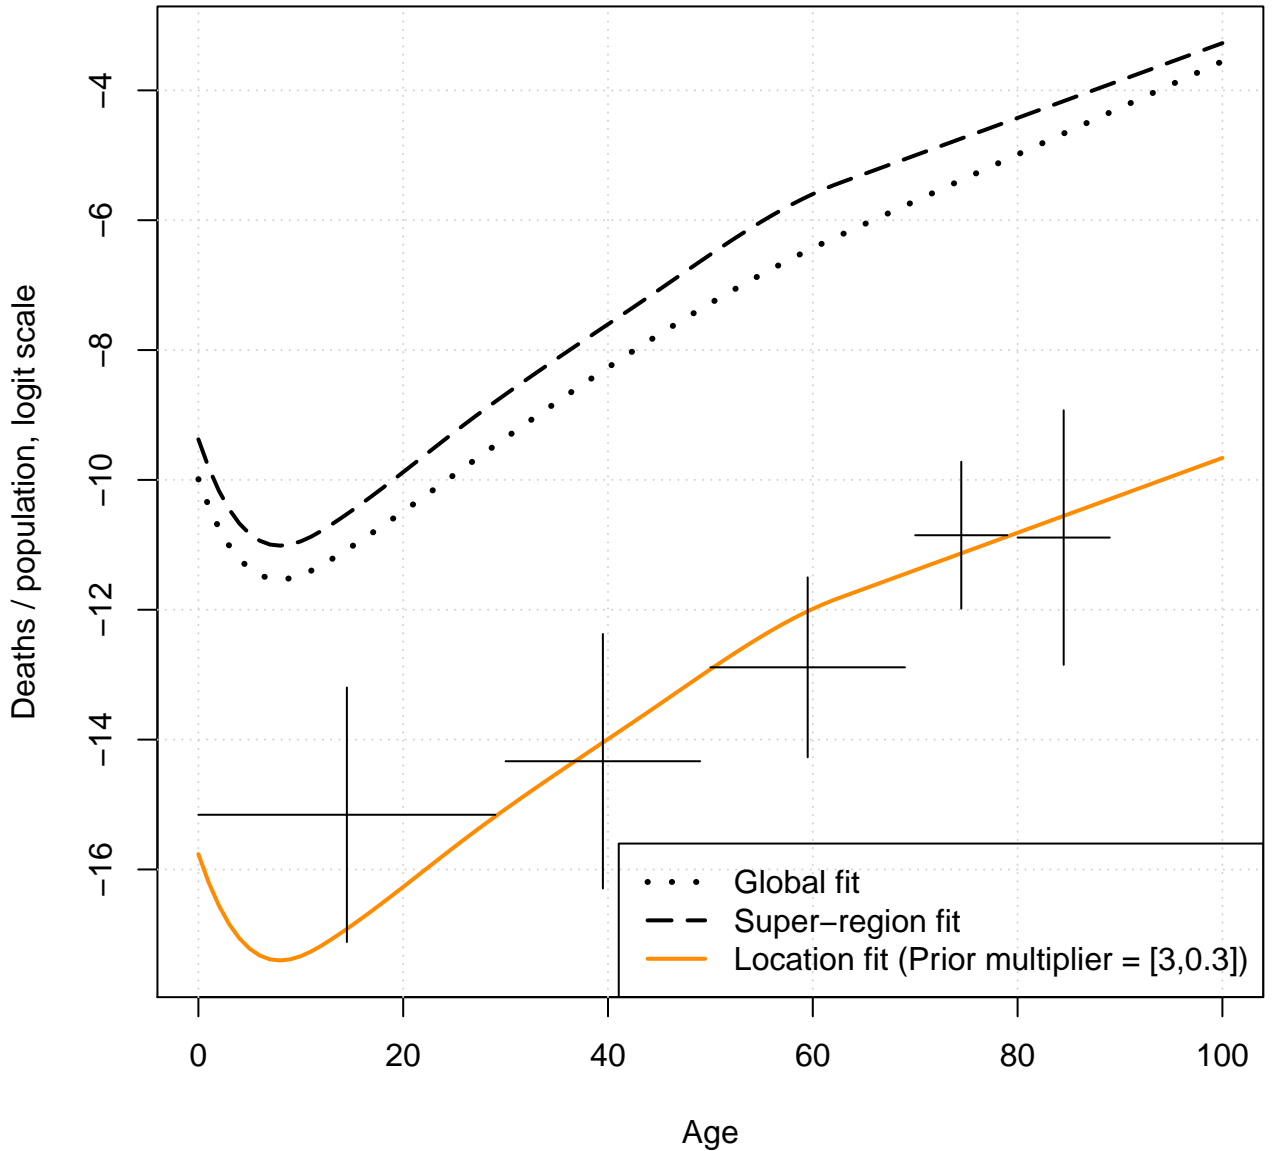

# Brazil

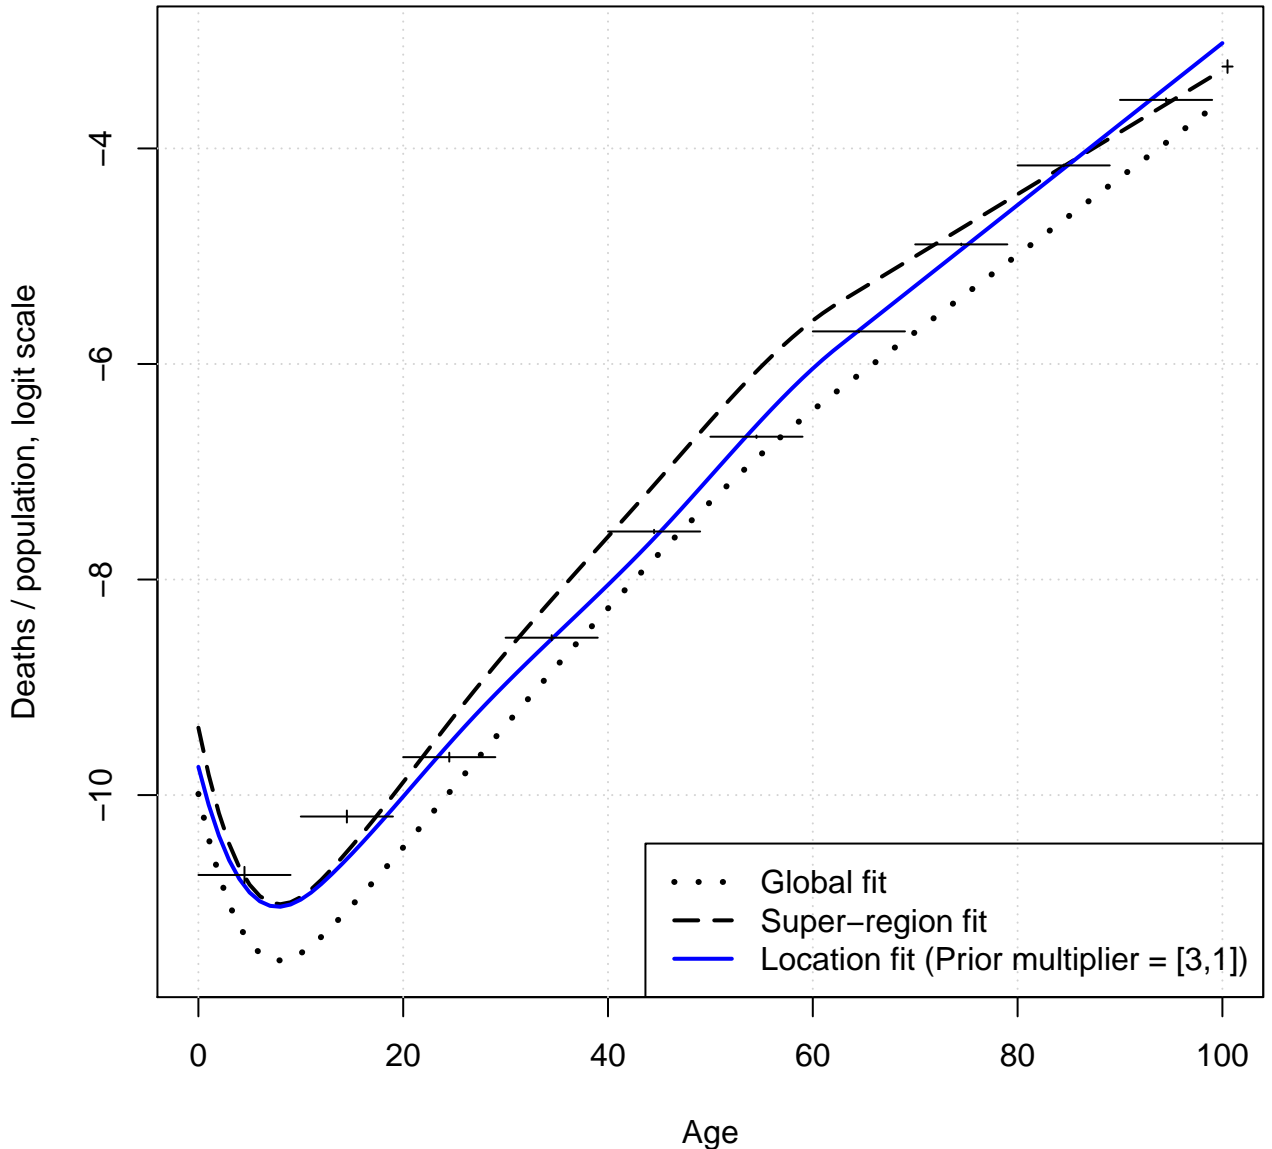

Figure S5. Age patterns of COVID-19 mortality for select countries and territories in north Africa and the Middle East

# Algeria

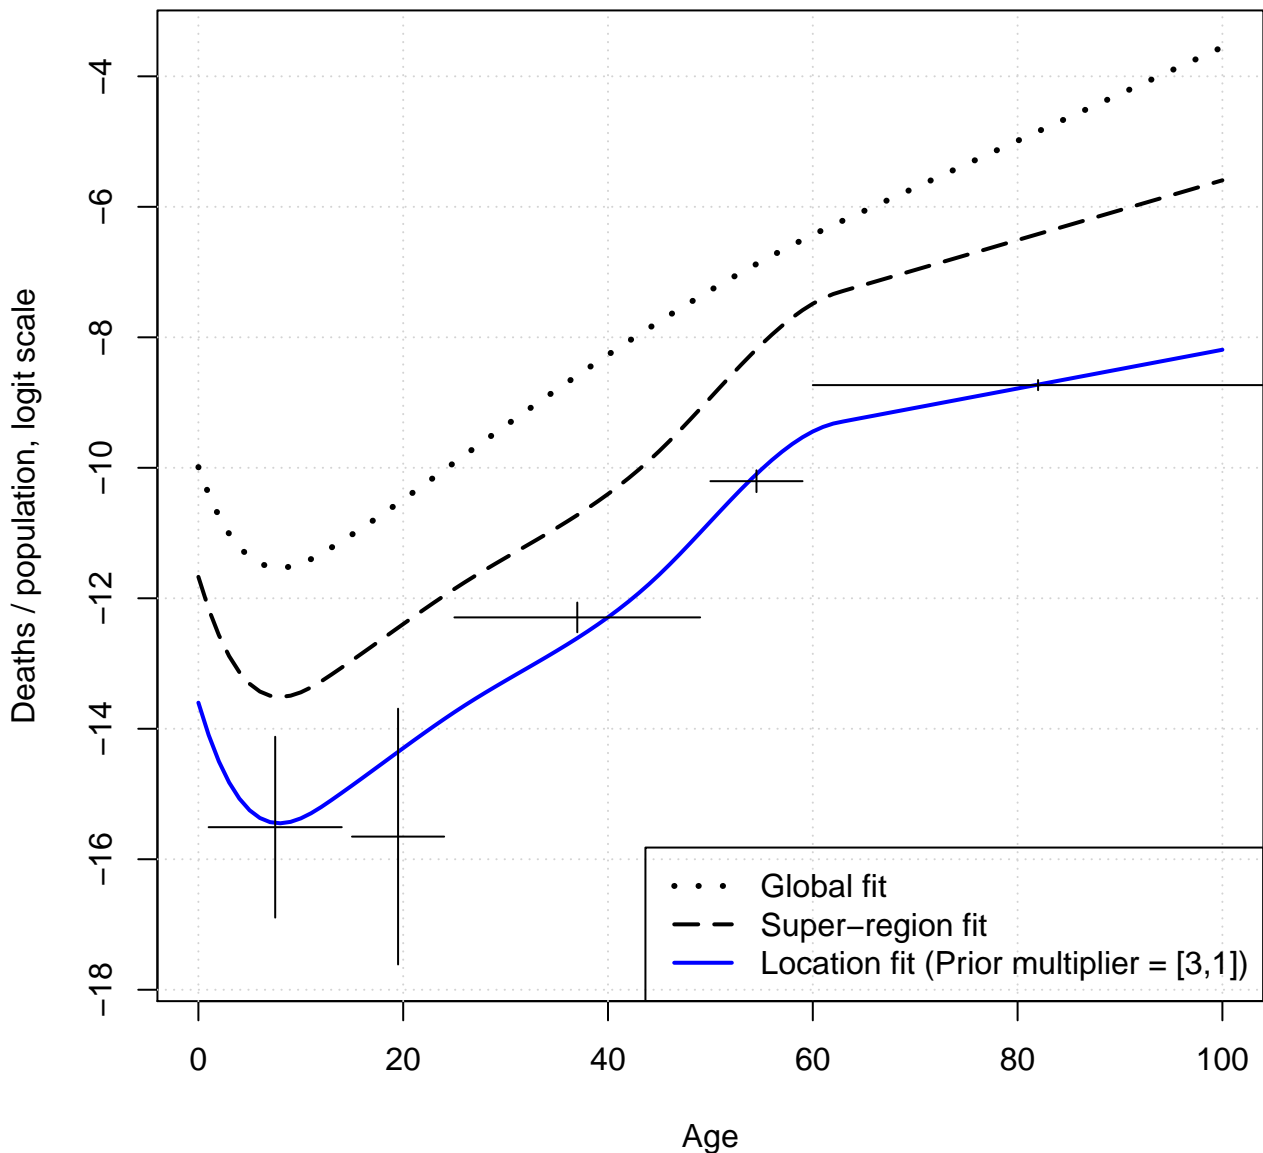

# Jordan

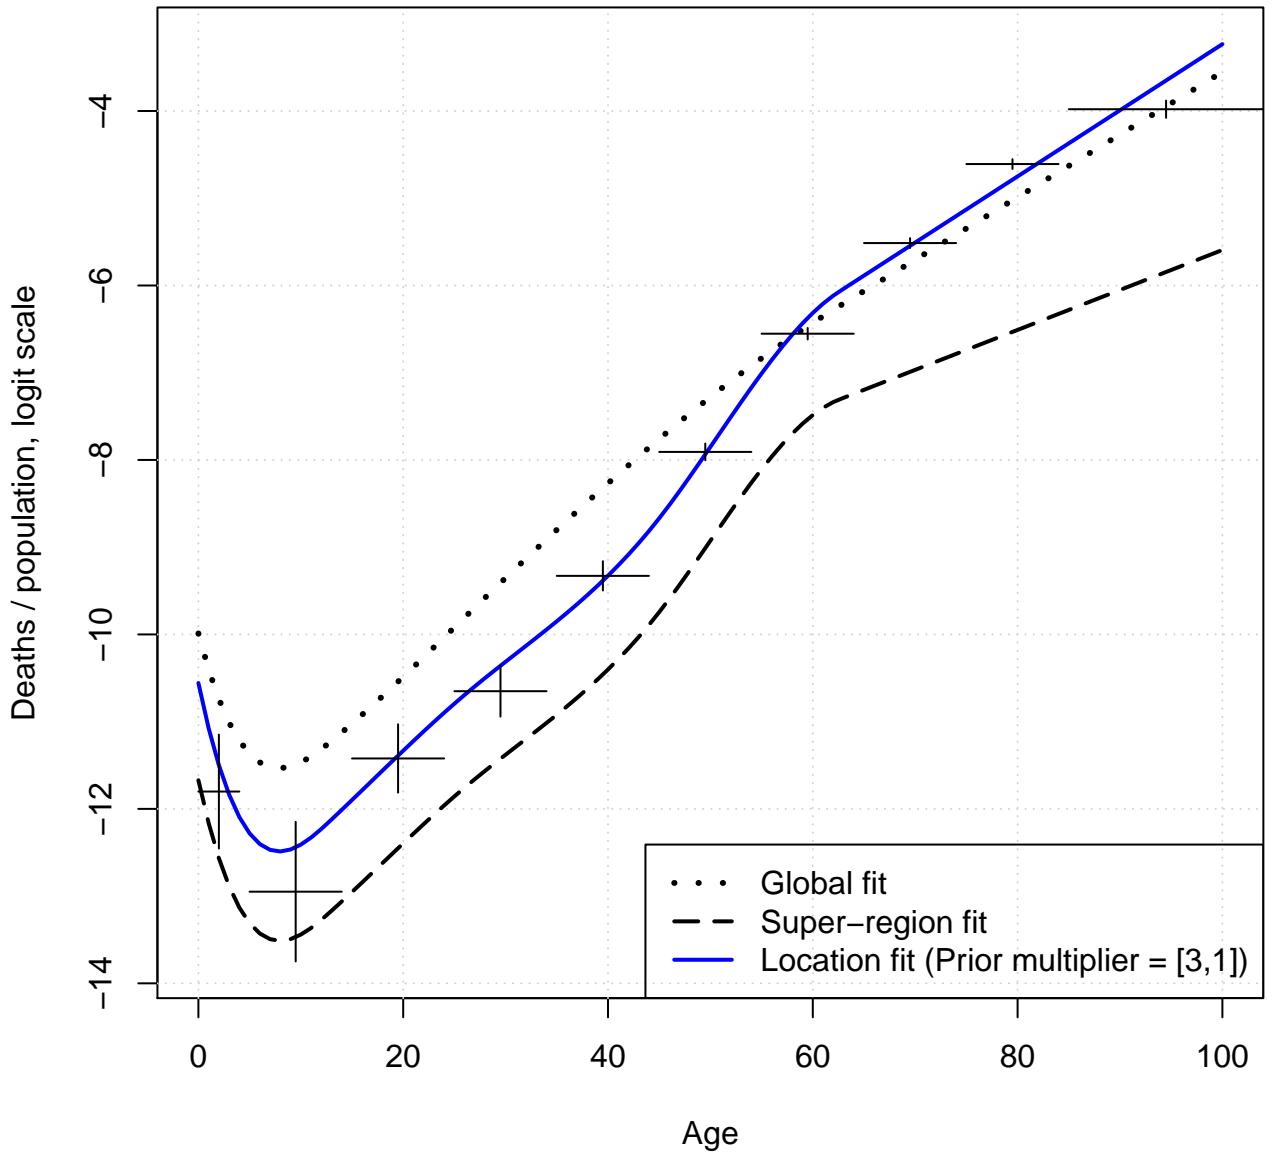

# Lebanon

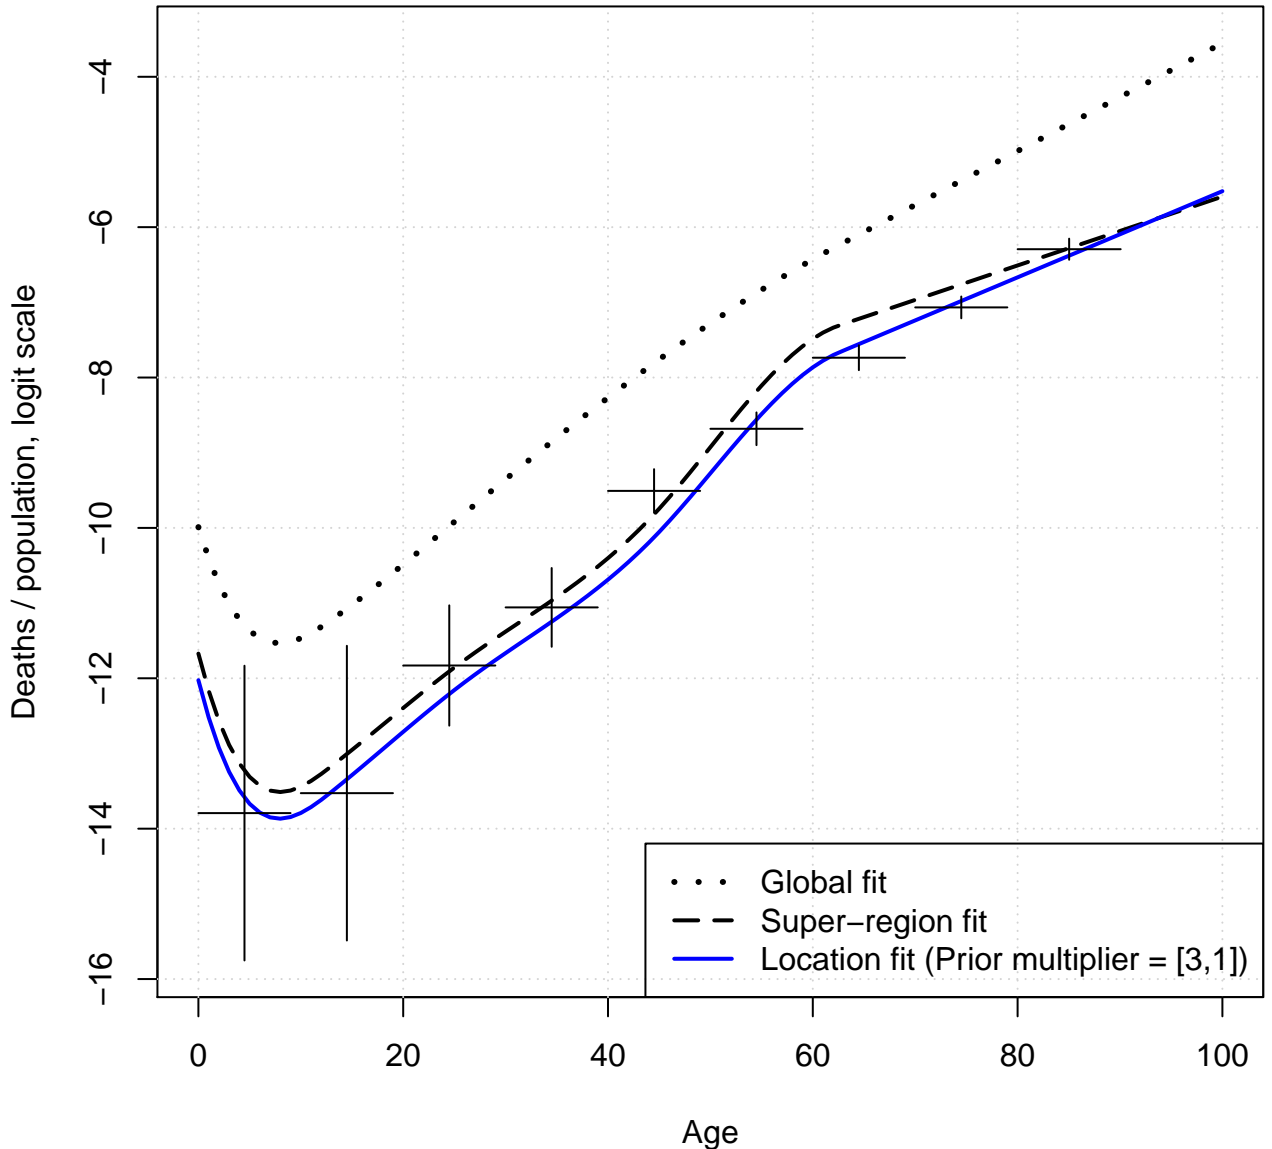

# Turkey

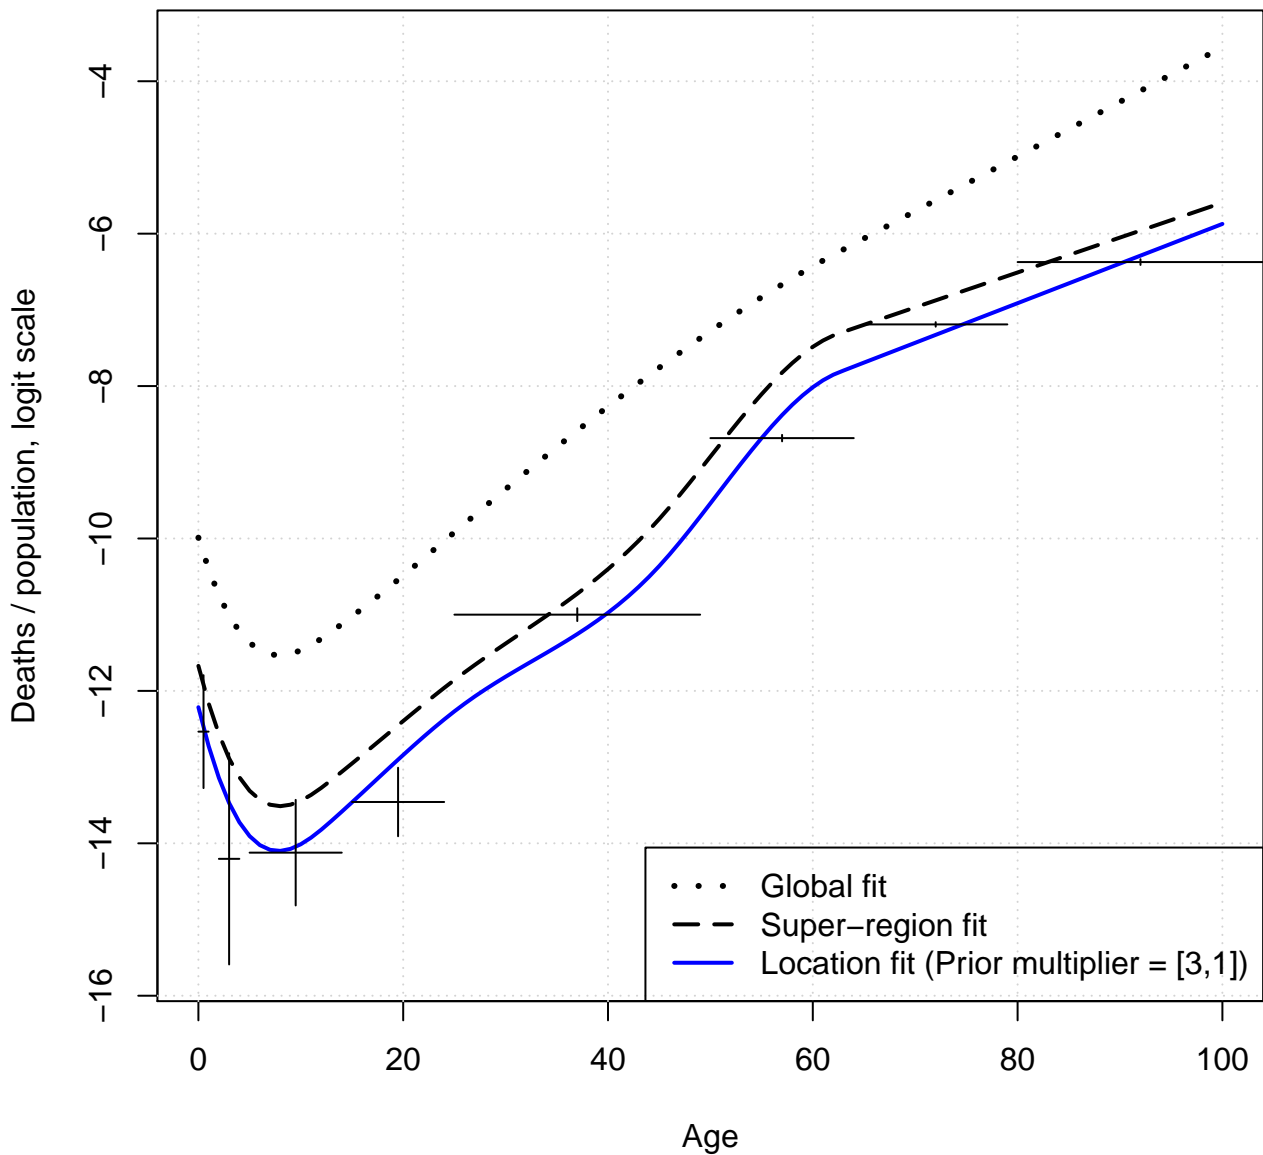

# Afghanistan

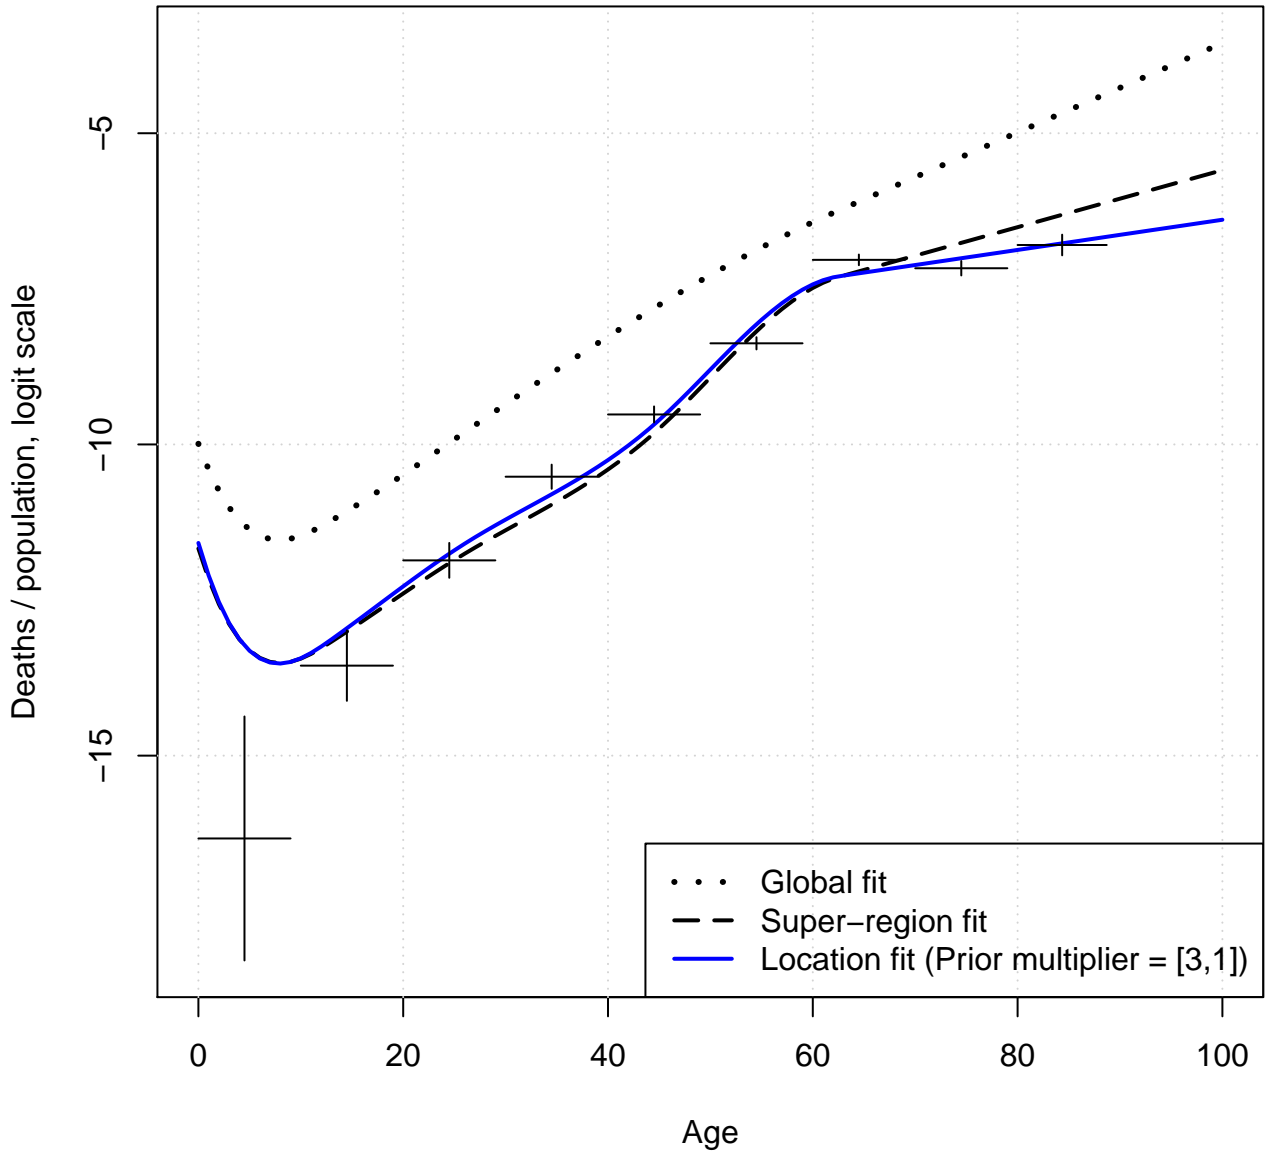



Figure S6. Age patterns of COVID-19 mortality for select countries and territories in south Asia

## Bangladesh

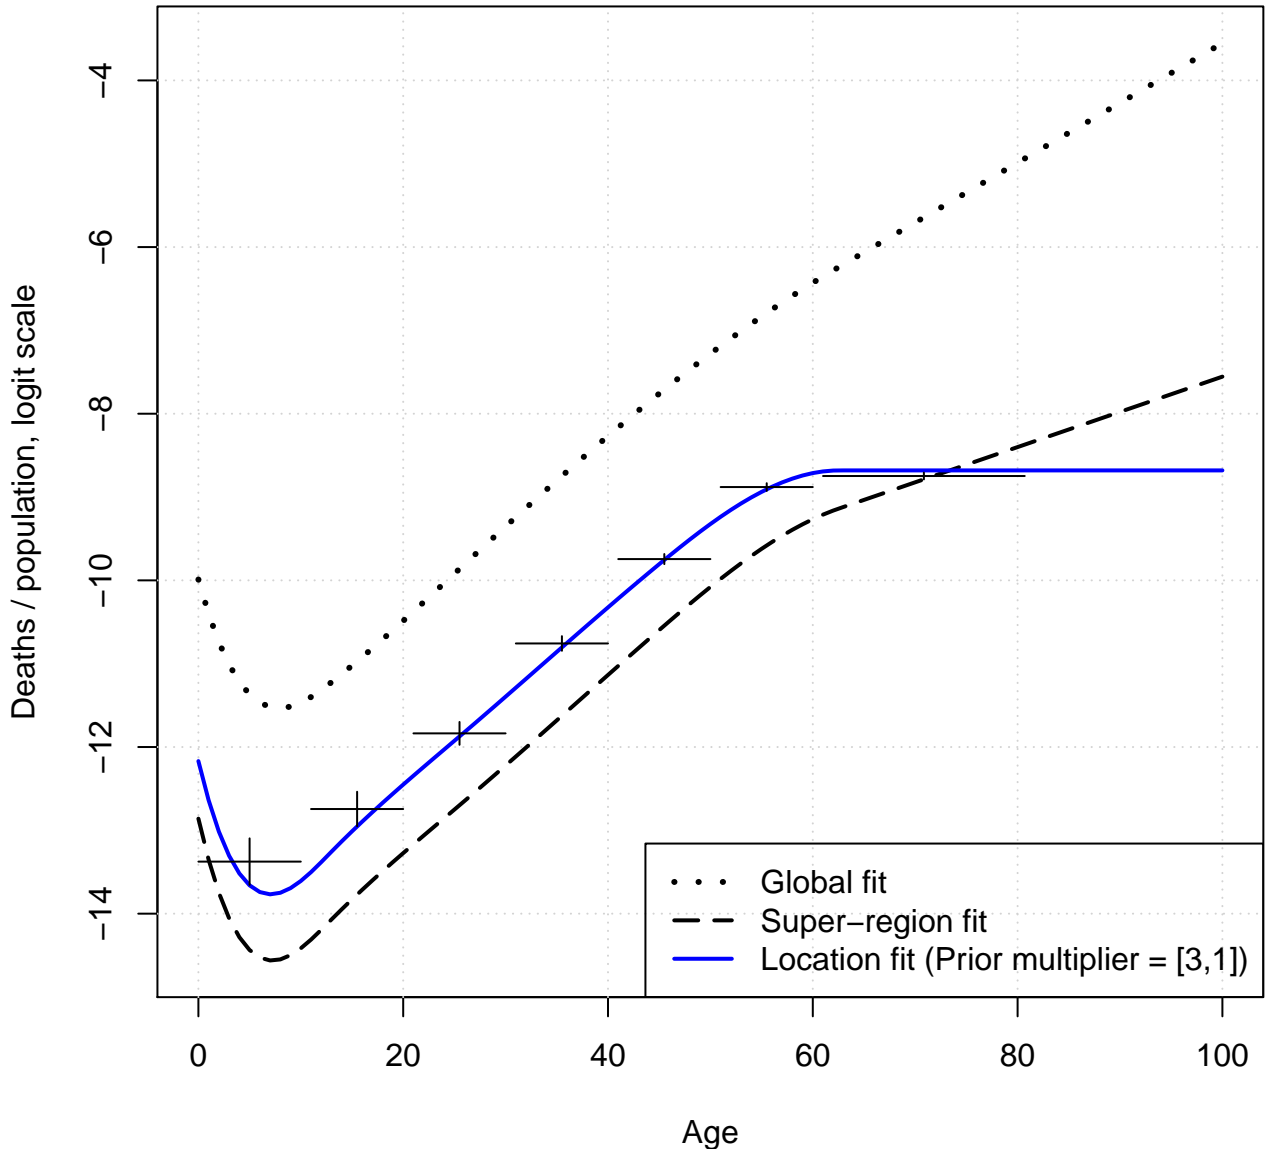

# India

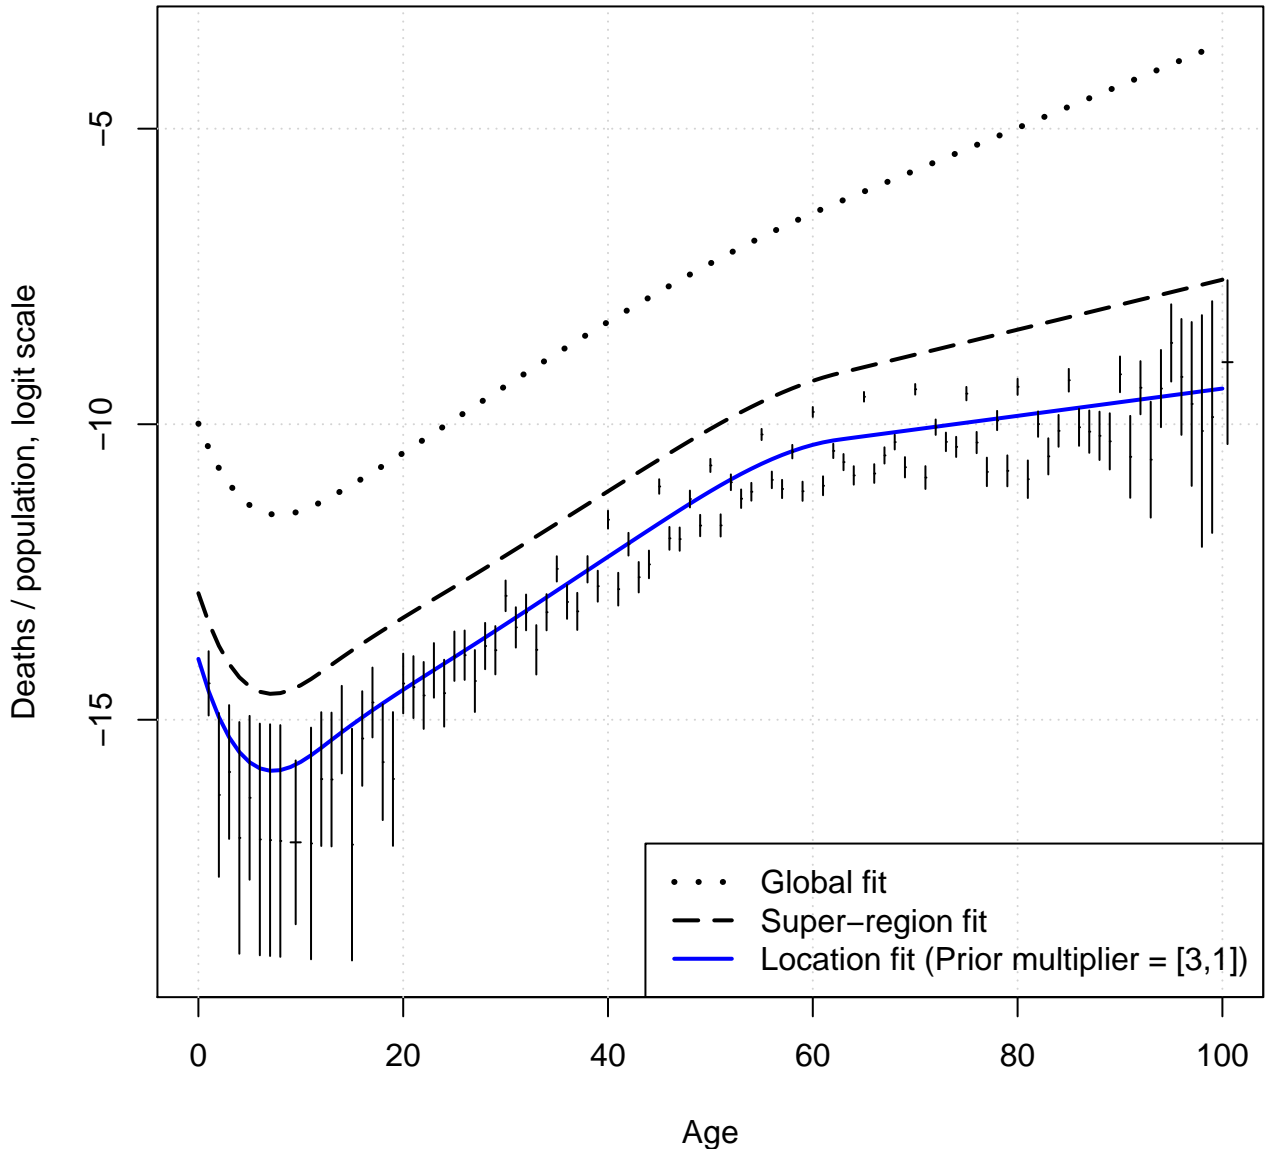

# Pakistan

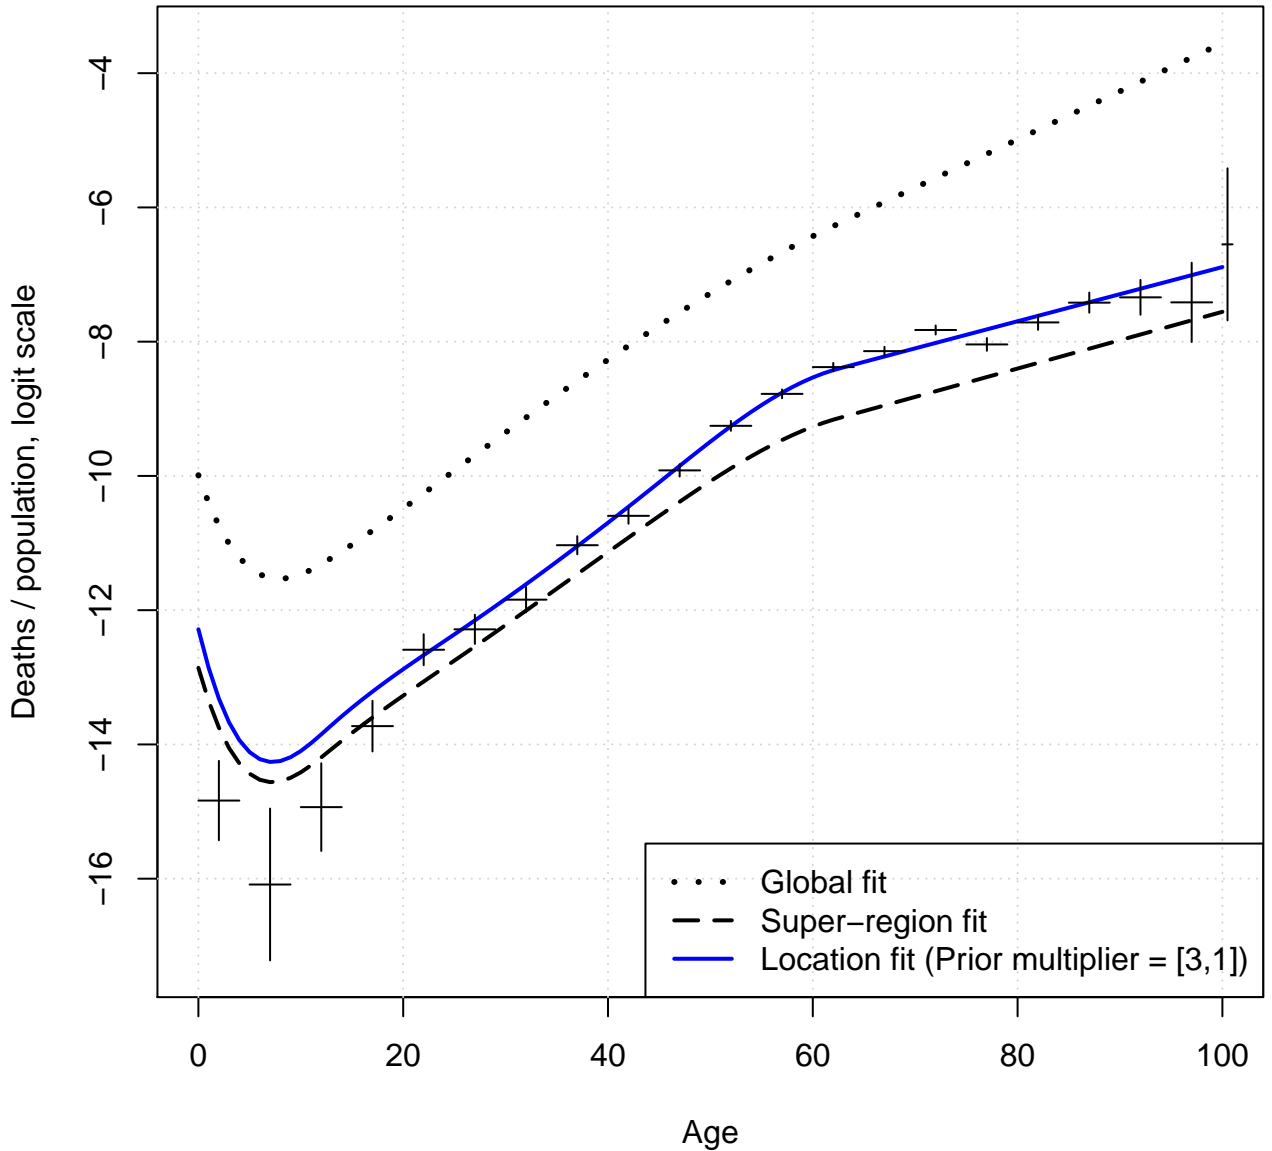

Figure S7. Age patterns of COVID-19 mortality for select countries and territories in sub-Saharan Africa

# Congo

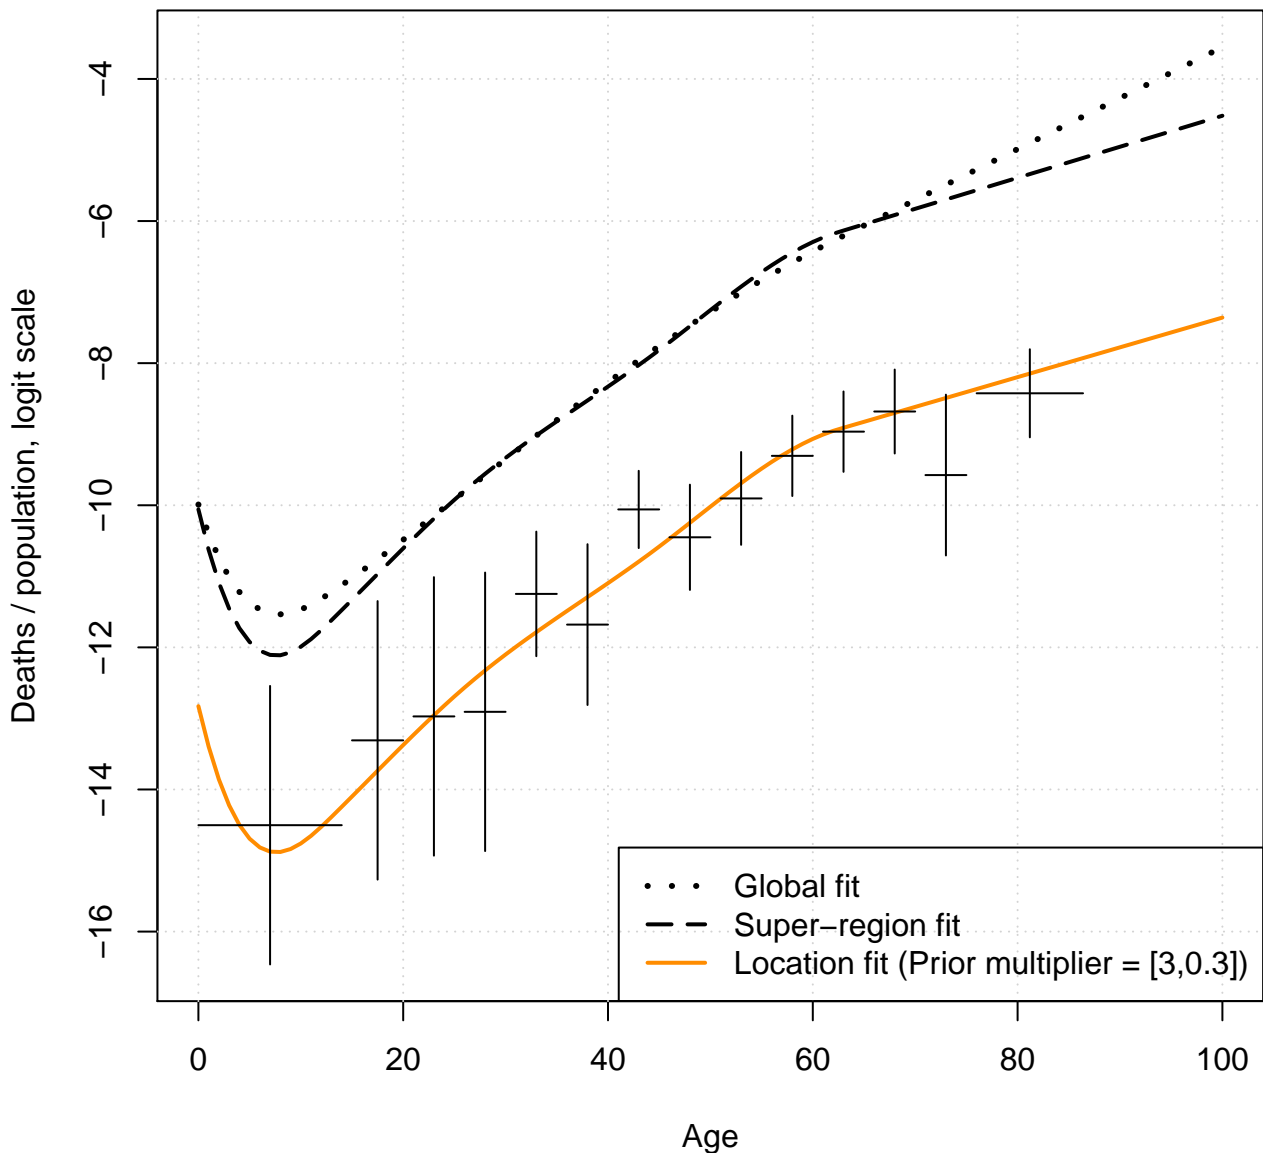

# Kenya

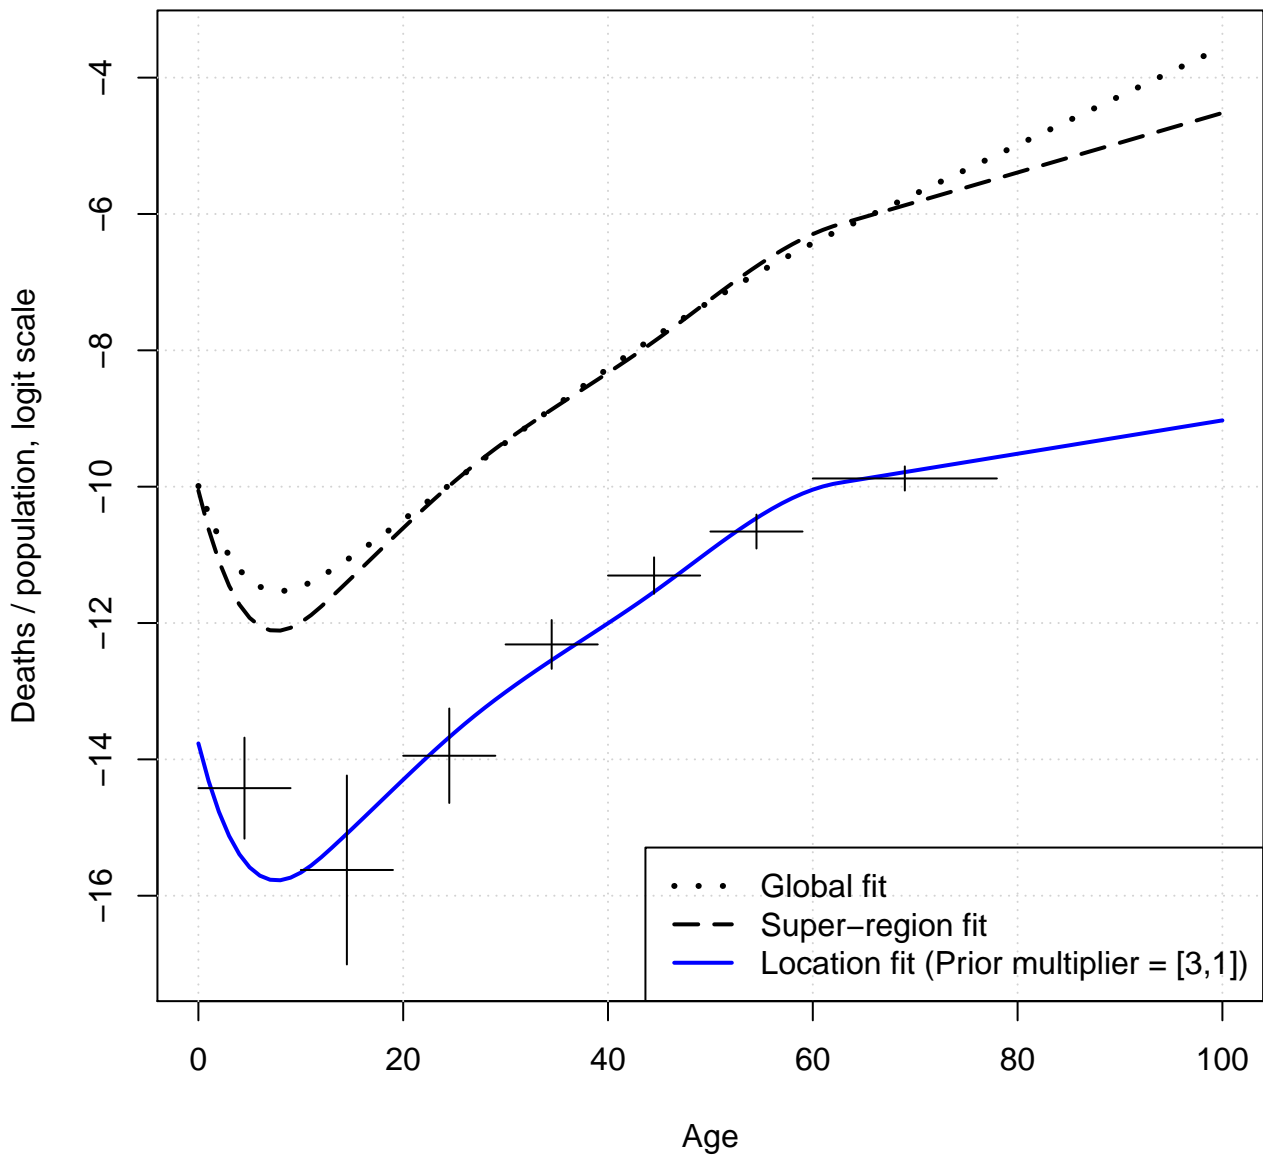

# Rwanda

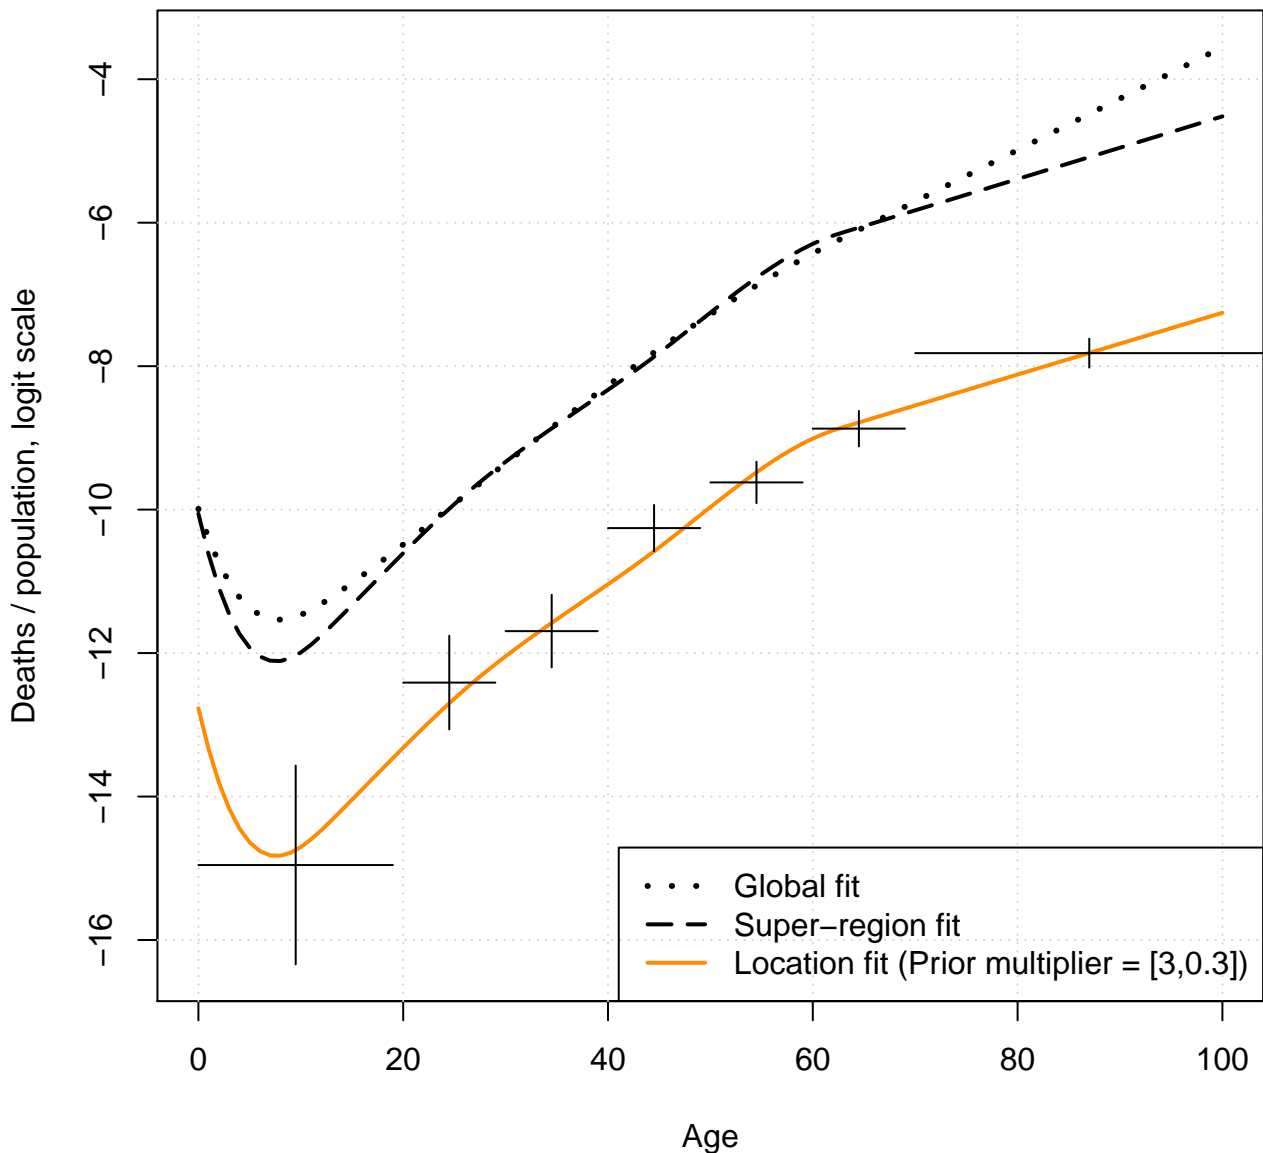

# Somalia

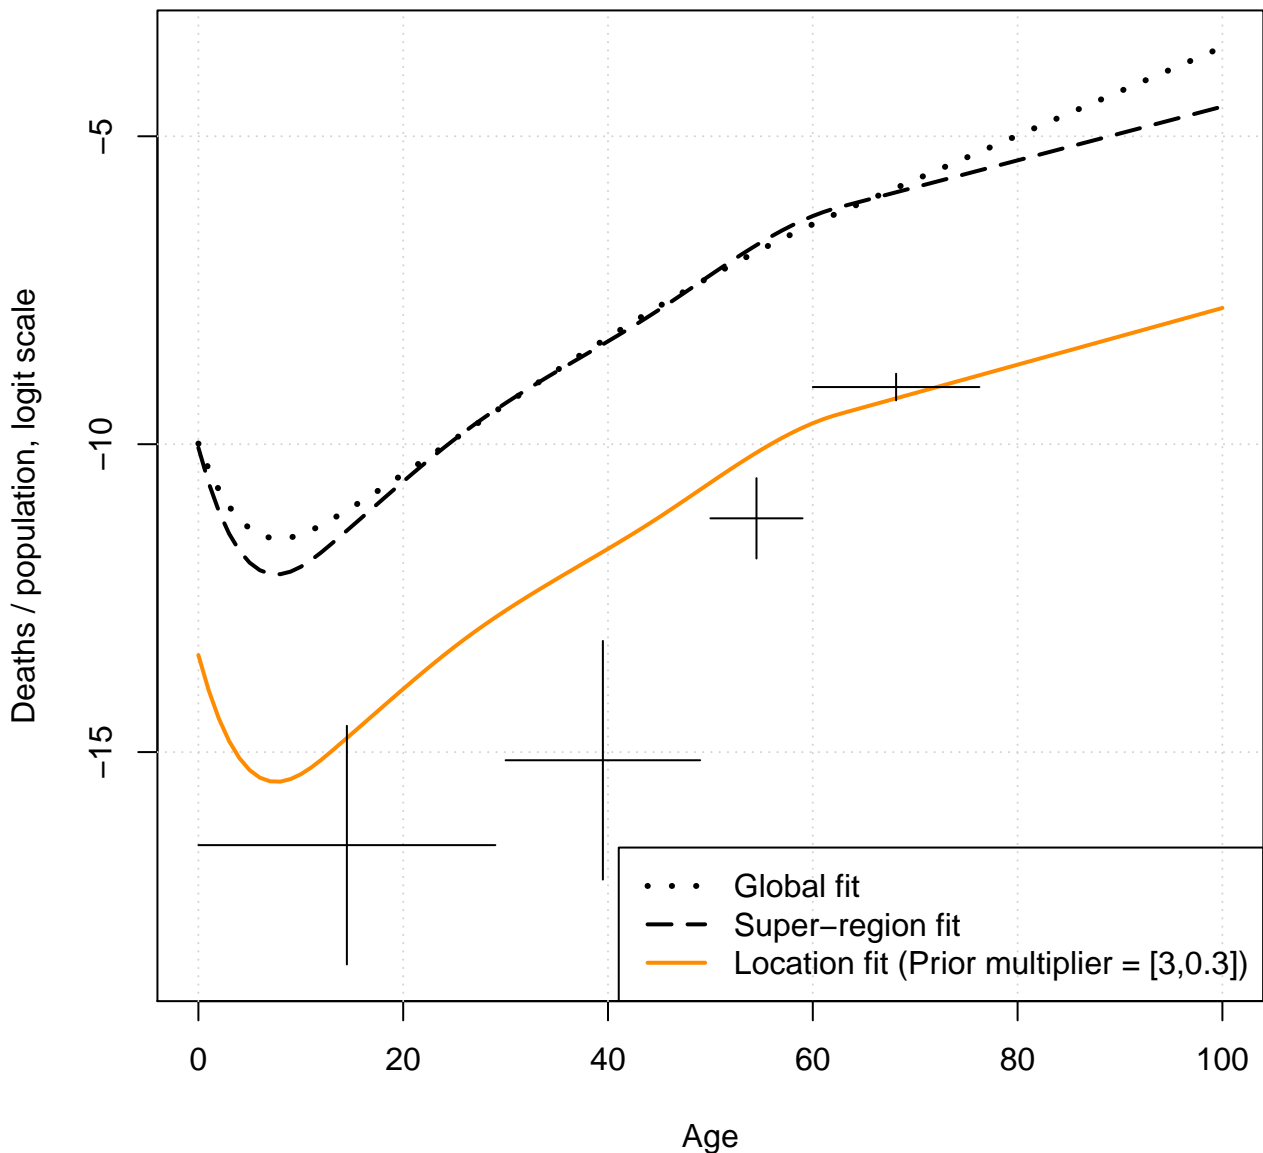

# Botswana

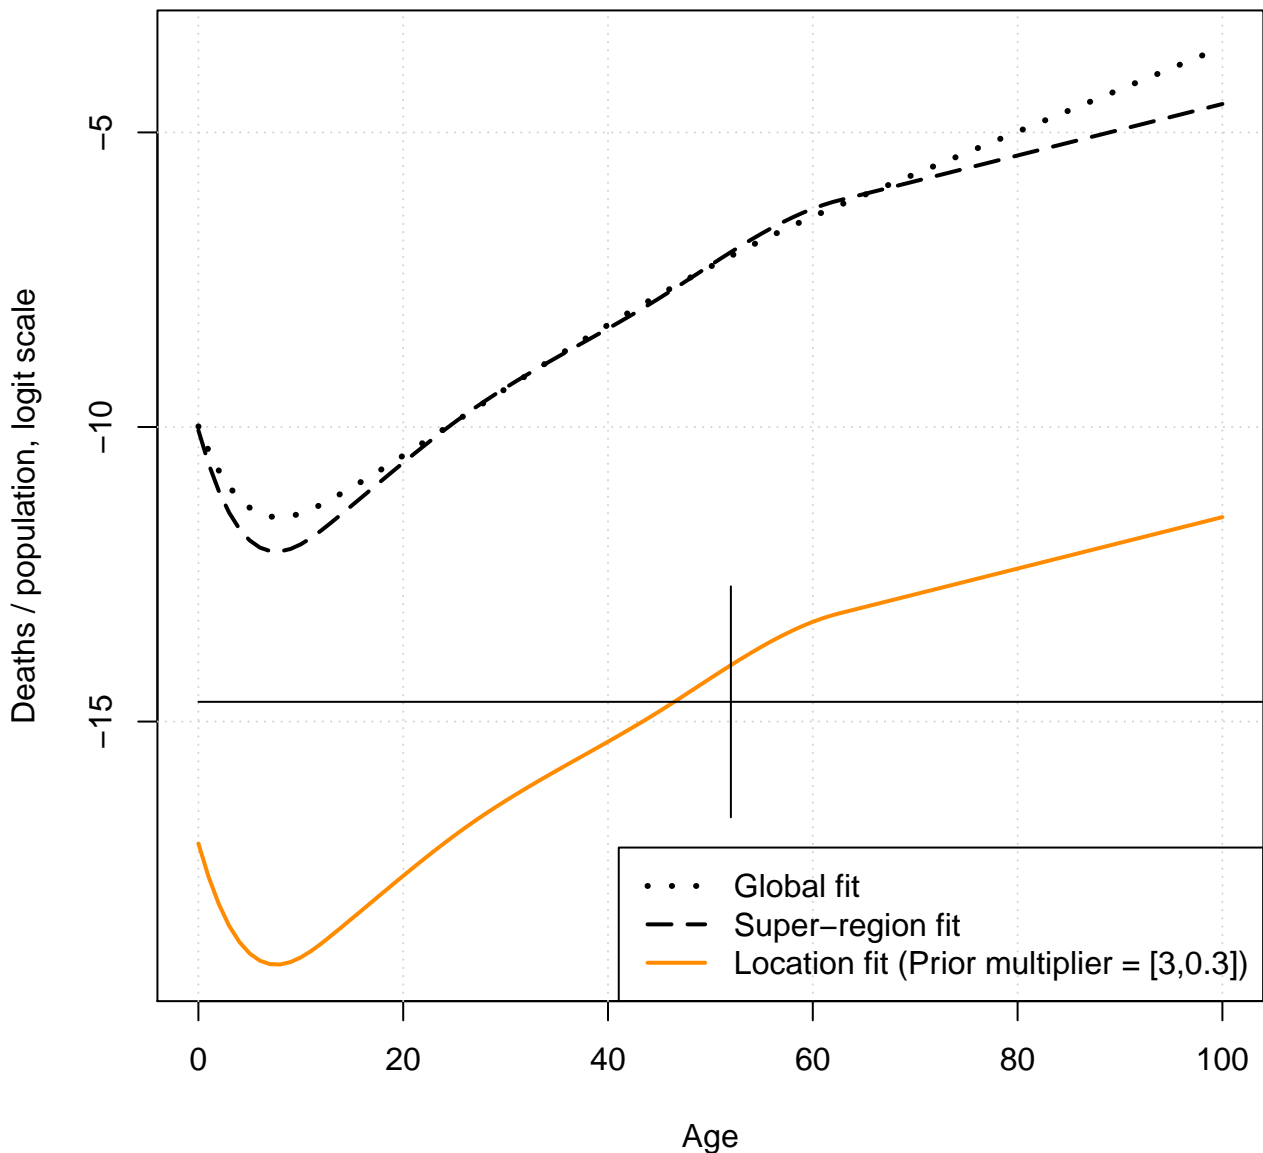

- • • Global fit
- - - Super-region fit
- Location fit (Prior multiplier = [3,0.3])



# South Africa

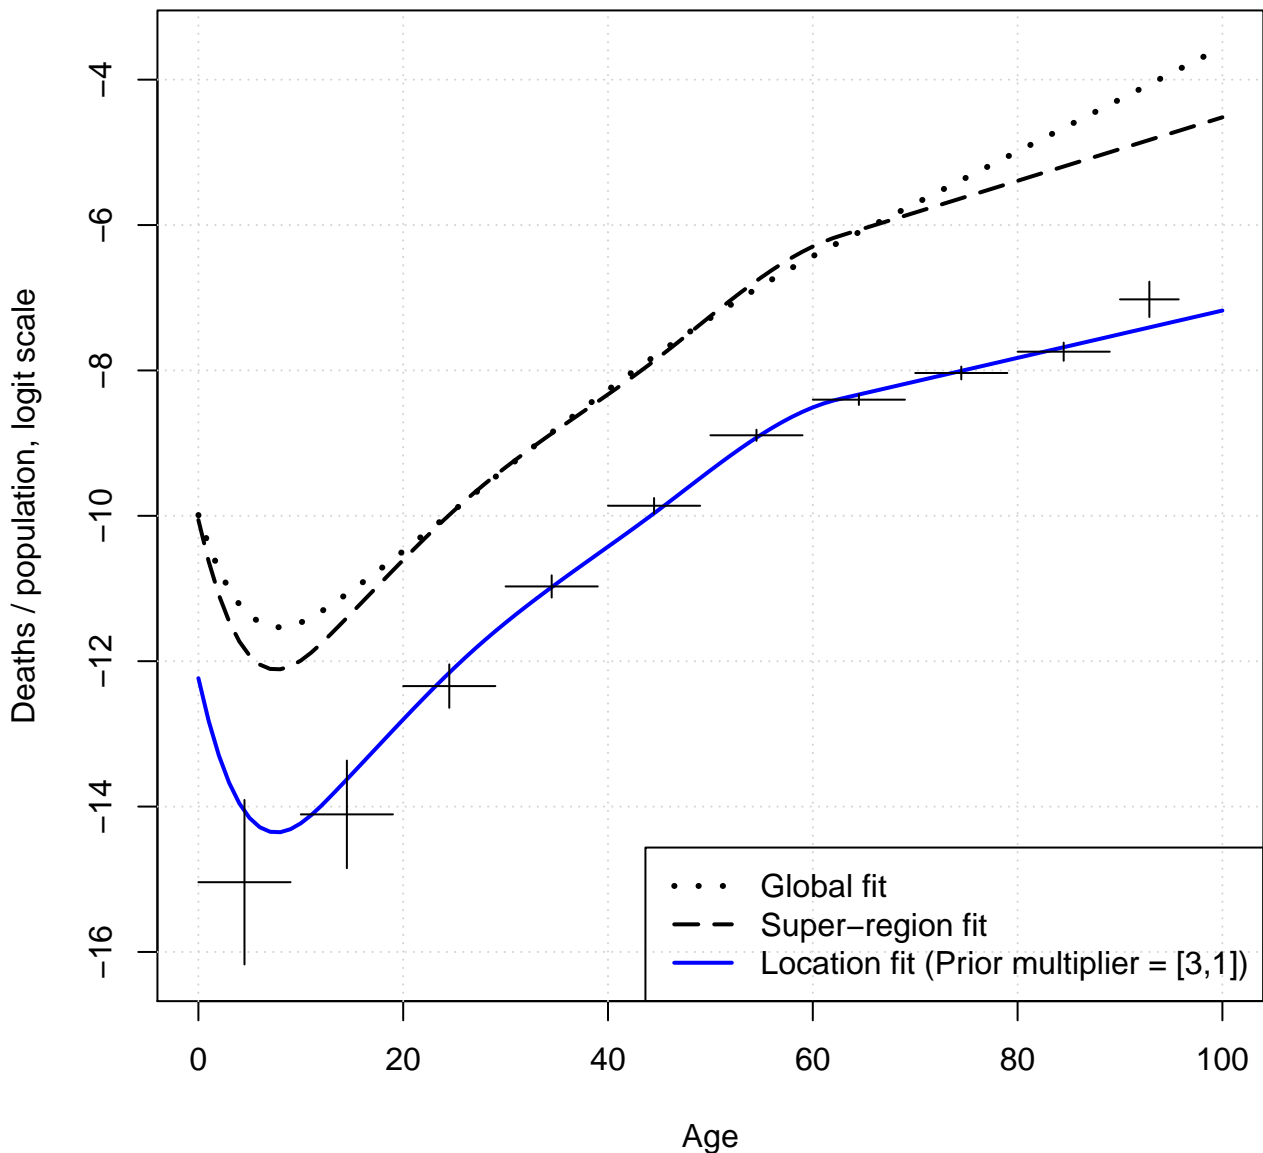

# Eswatini

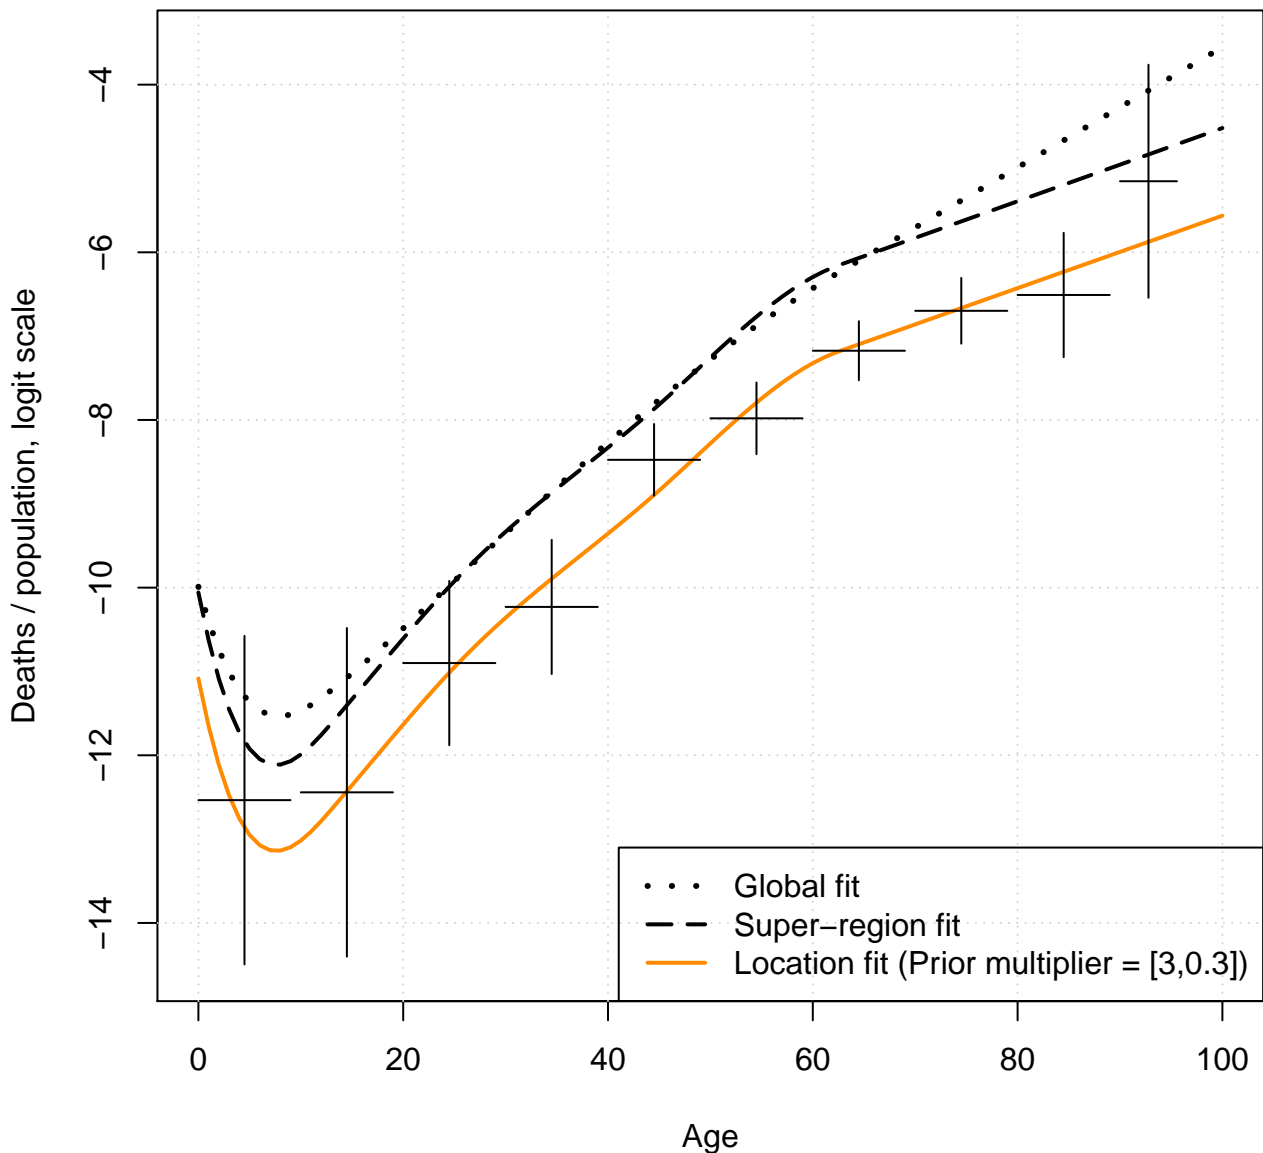

# Burkina Faso

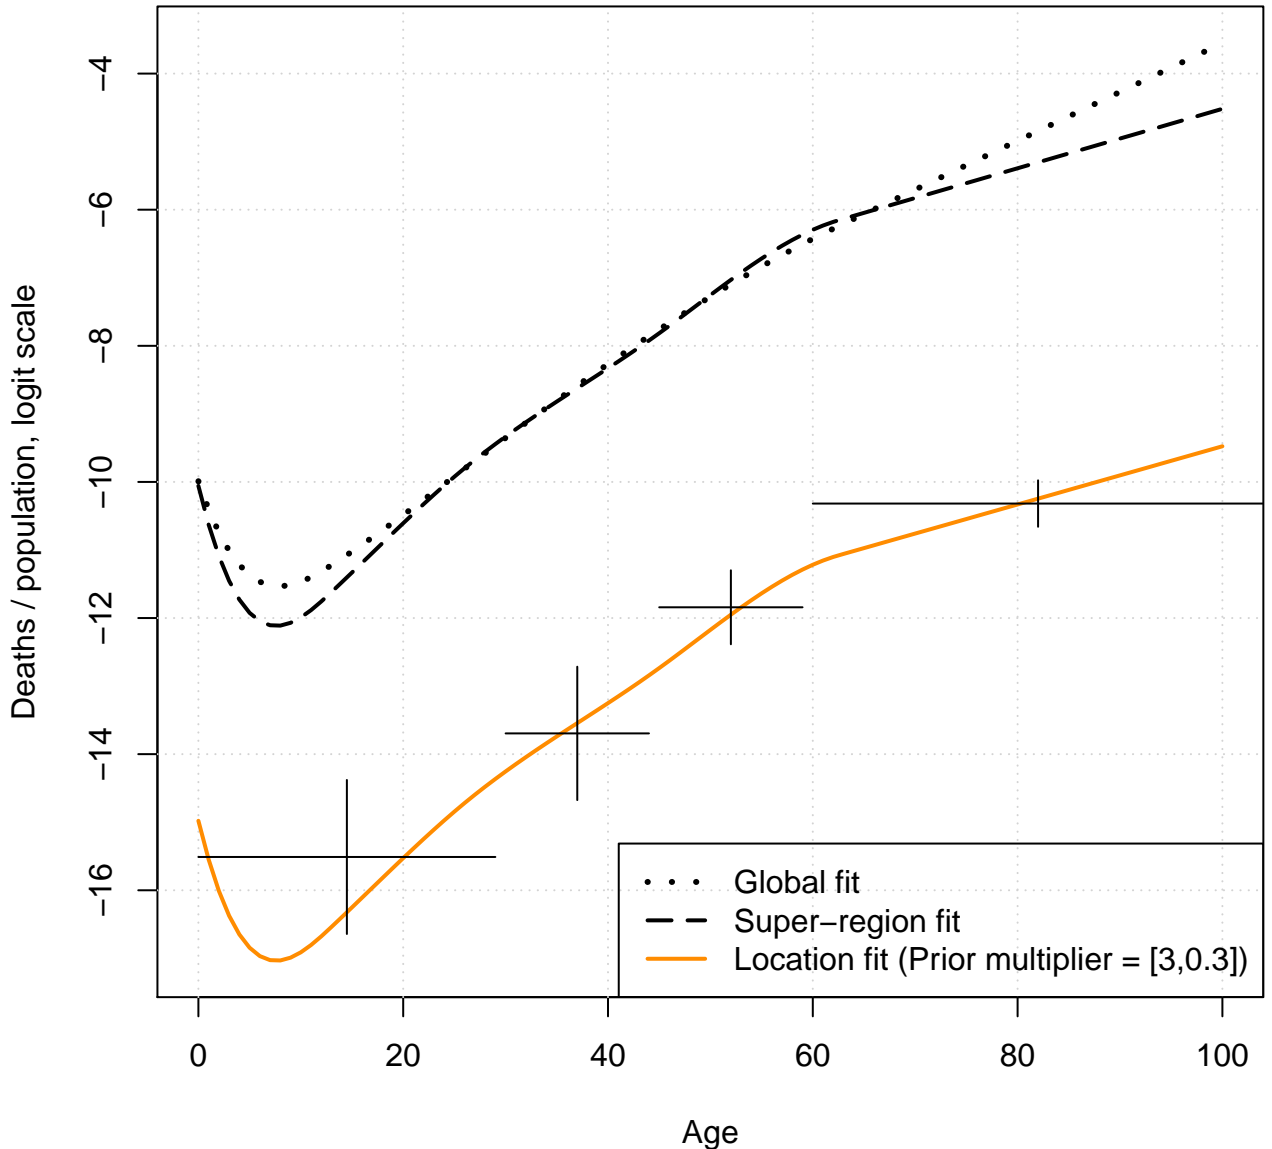

# Cameroon

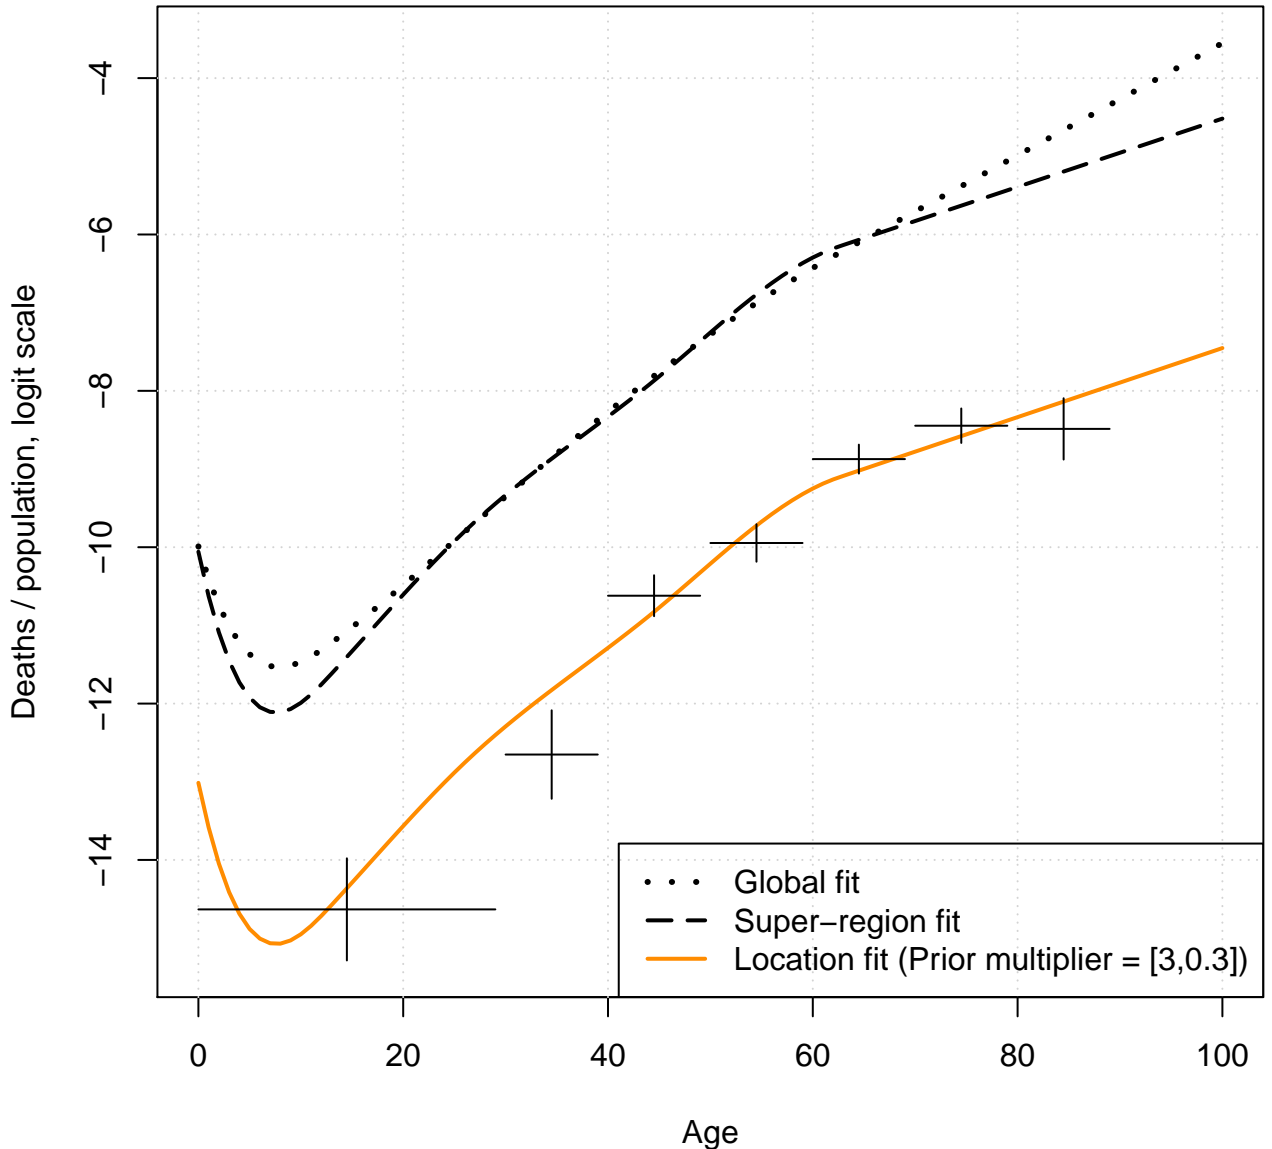

# Sierra Leone

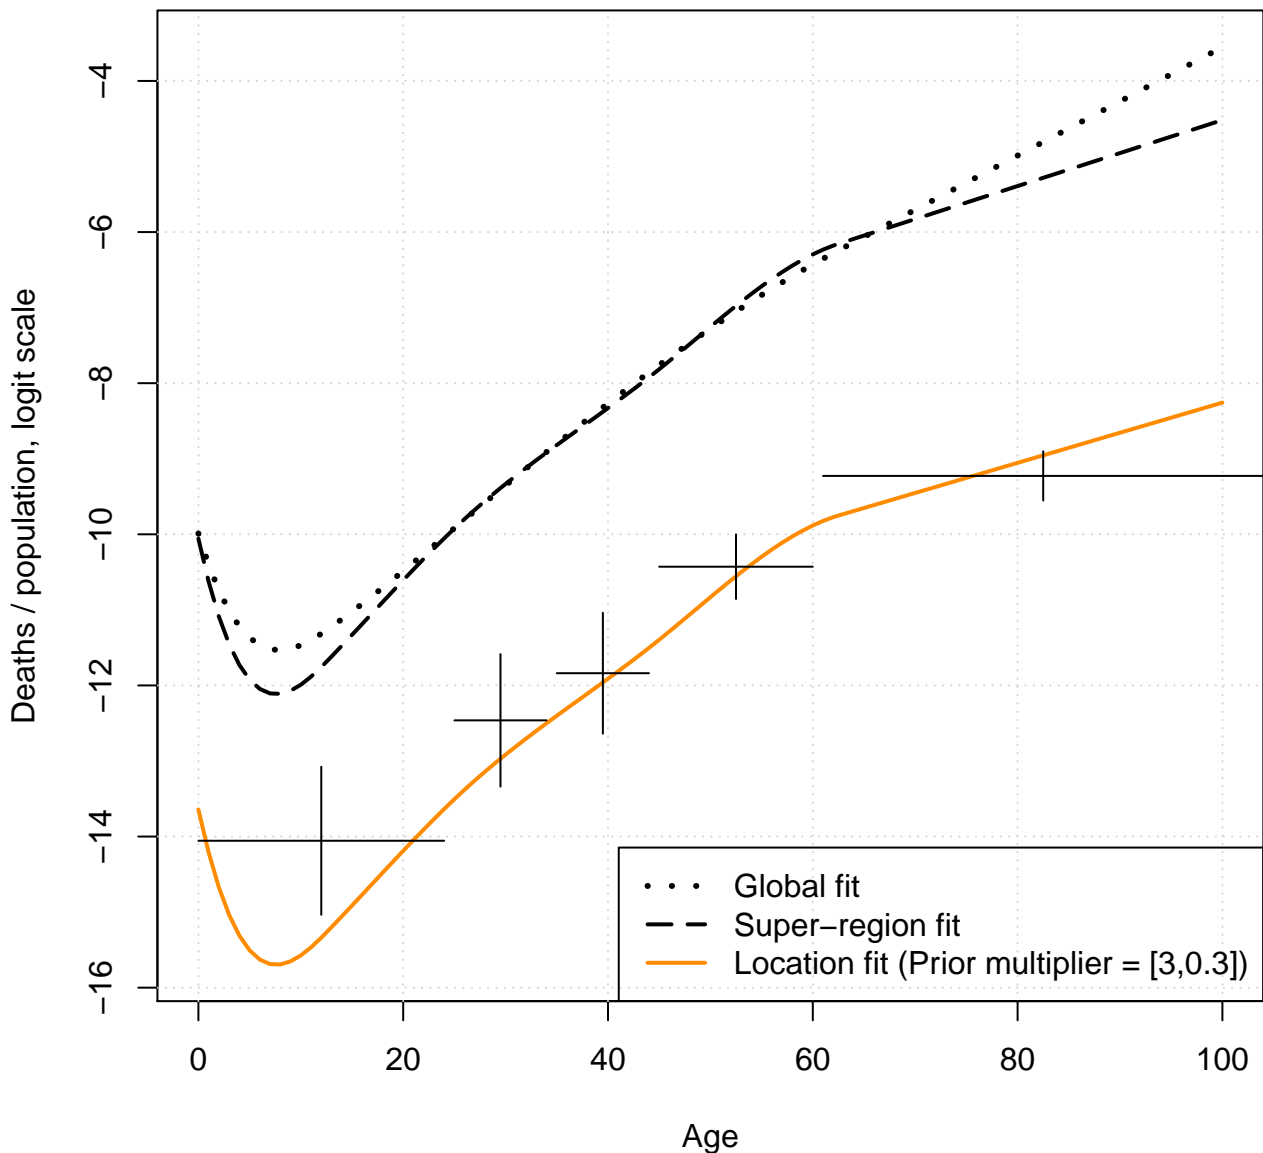

# Togo

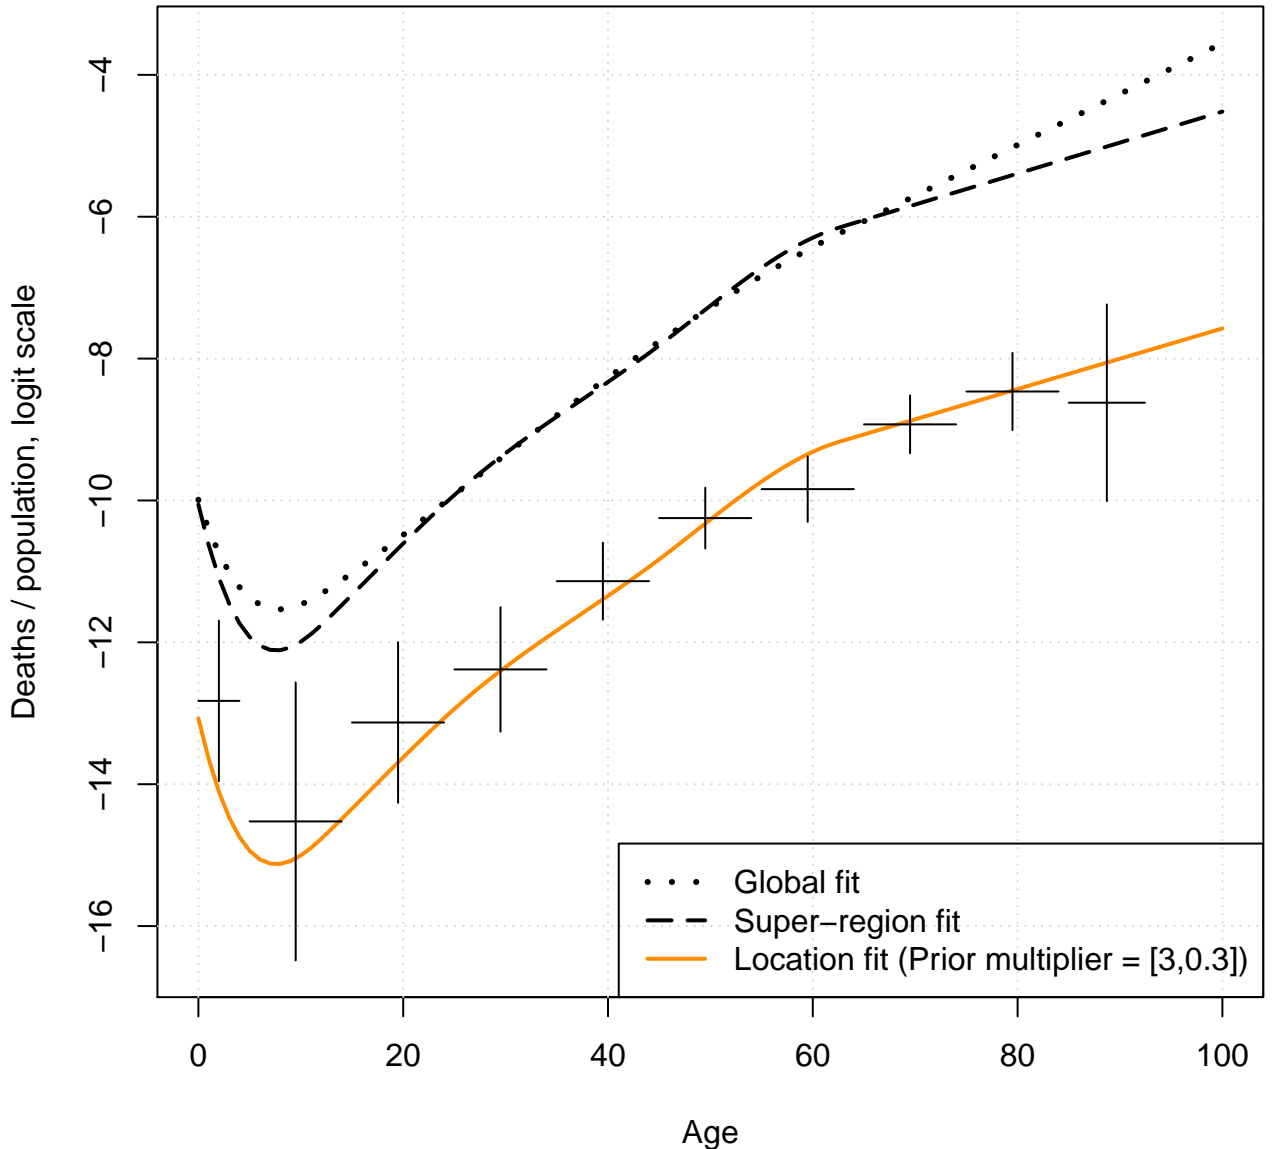

Figure S8. Age patterns of COVID-19 mortality for select subnational locations

# Northern Ireland

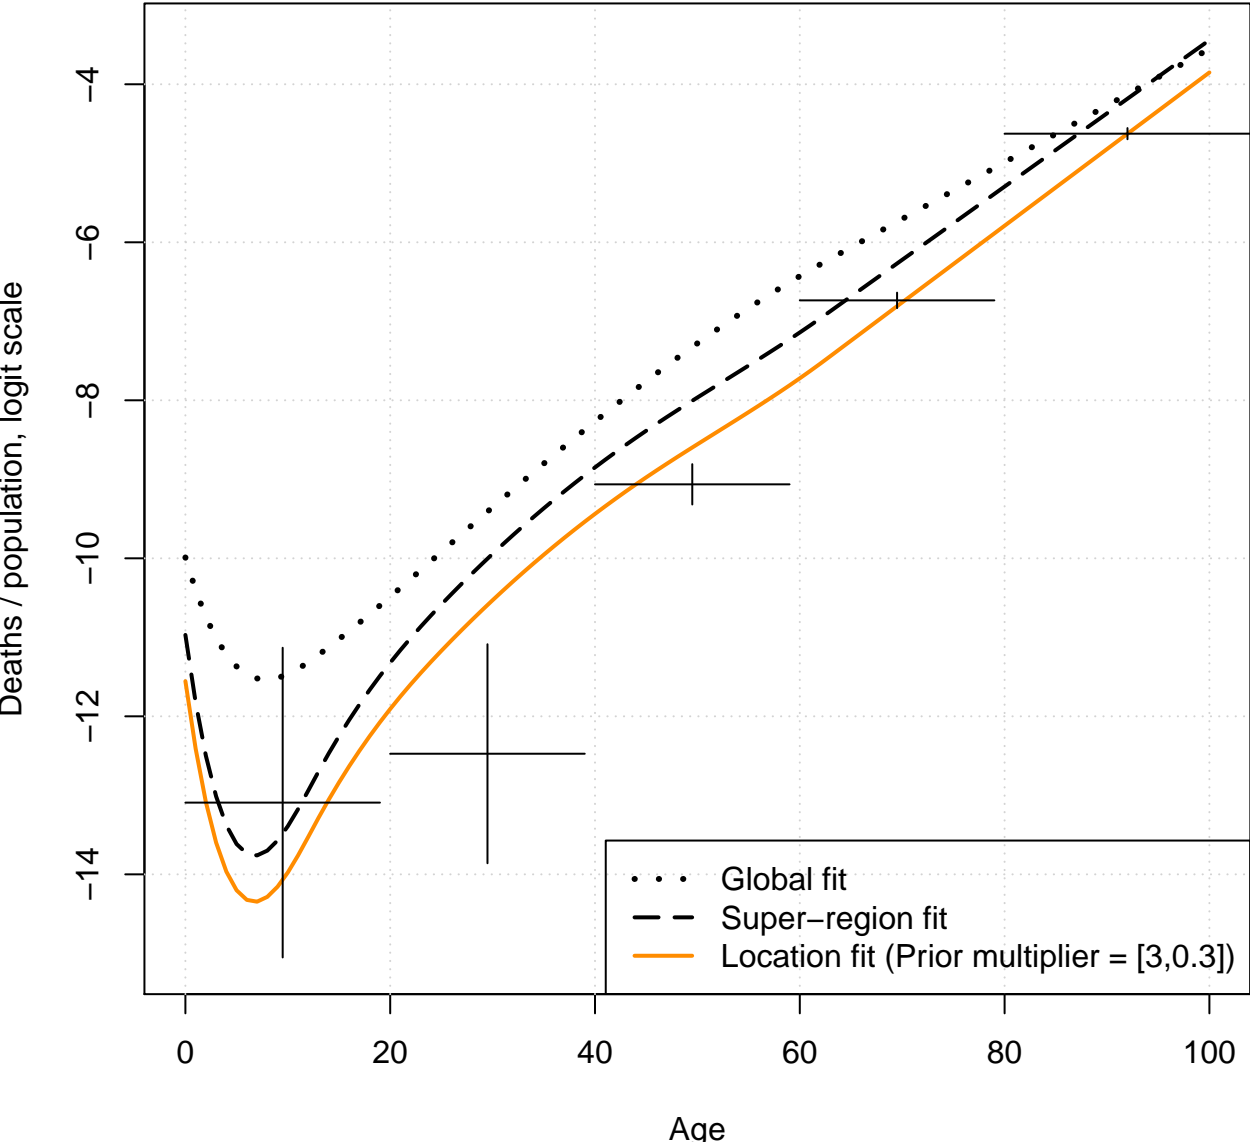

# Scotland

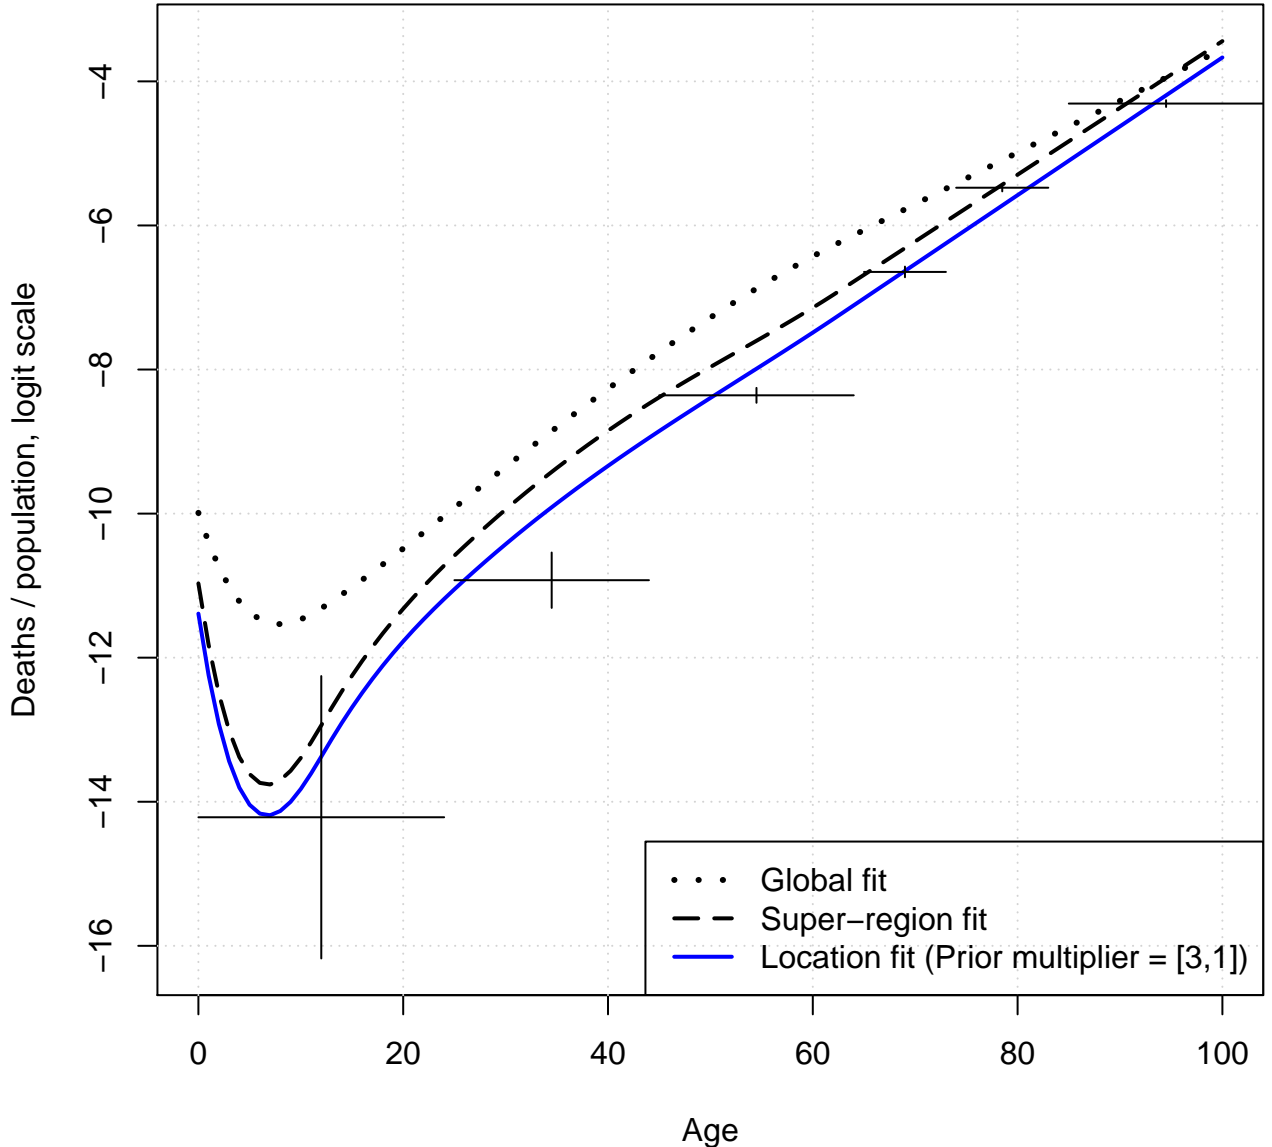



## Gauteng

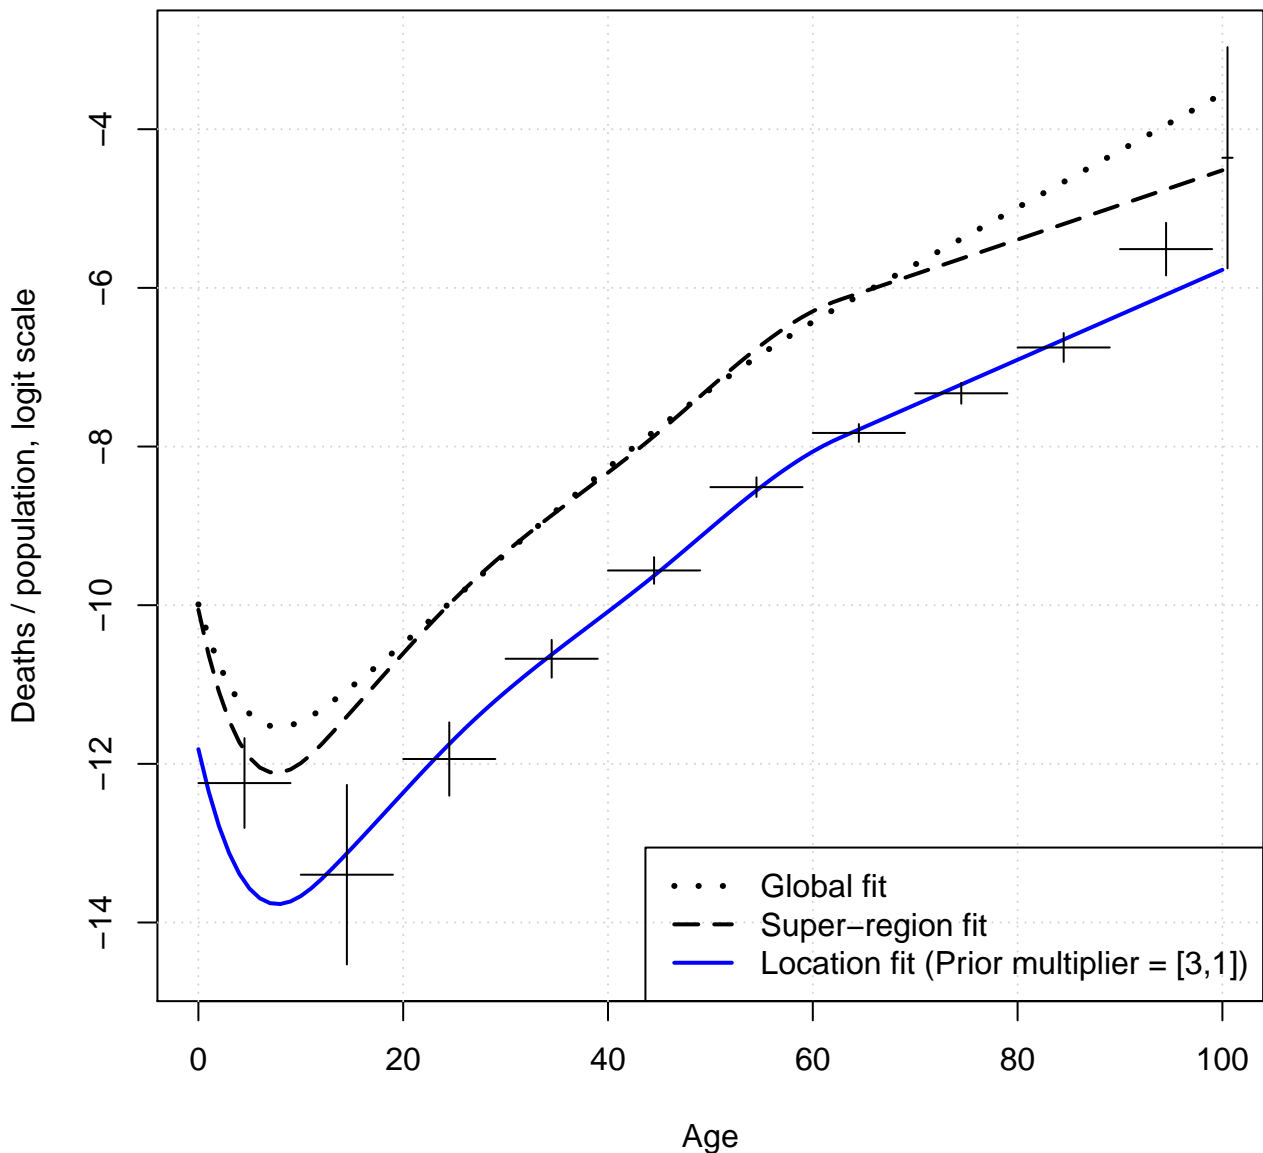

# Western Cape

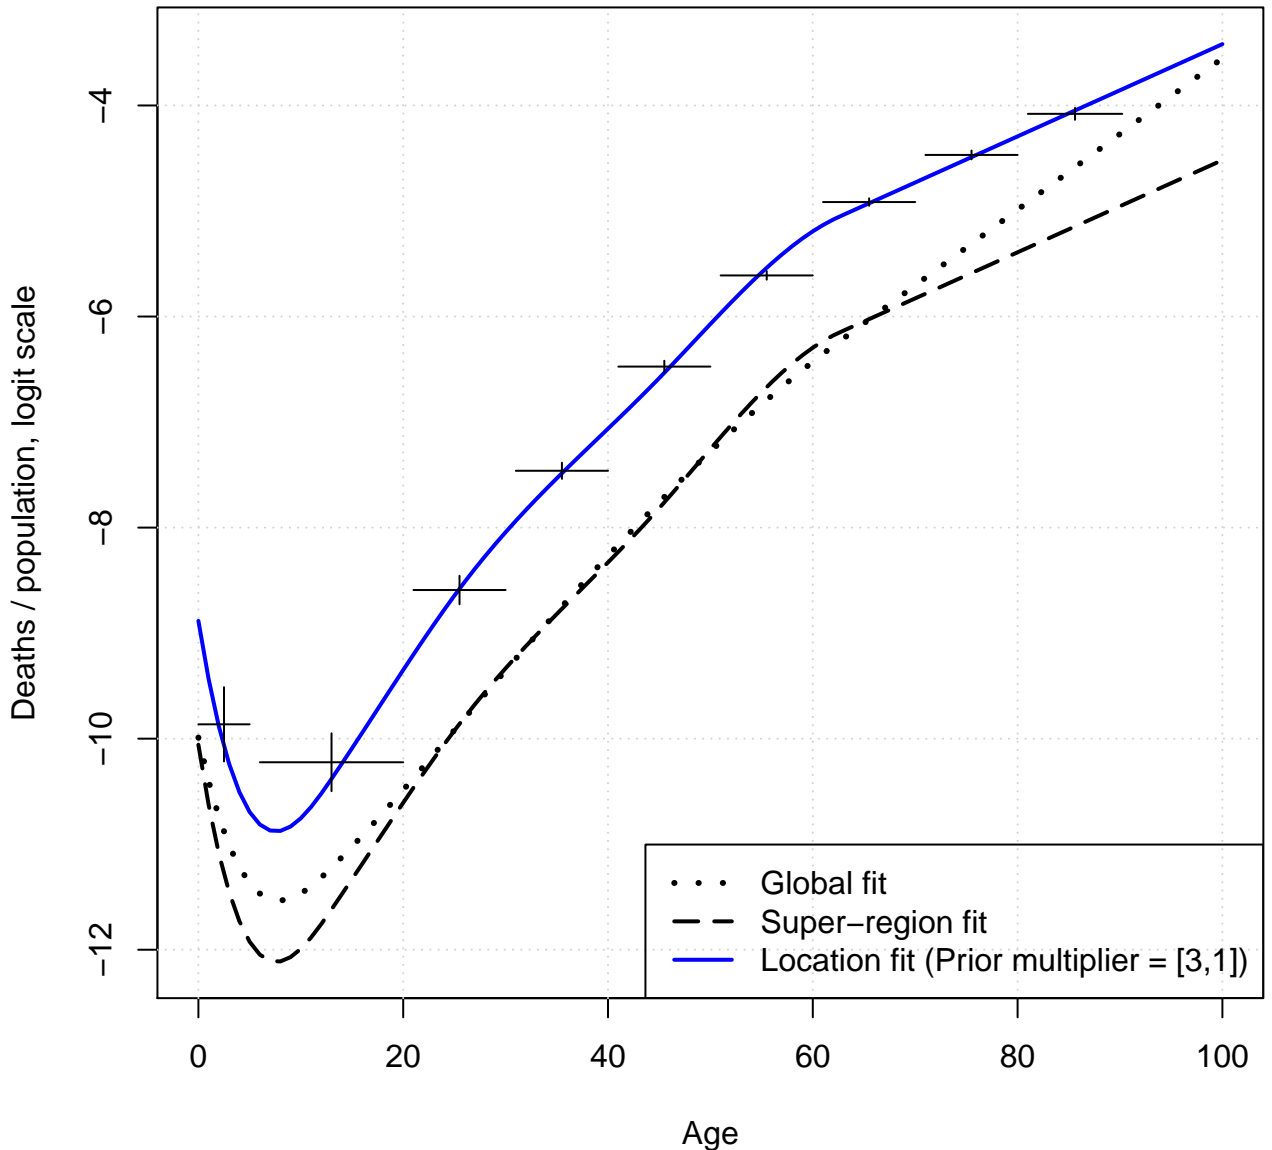

## Alabama

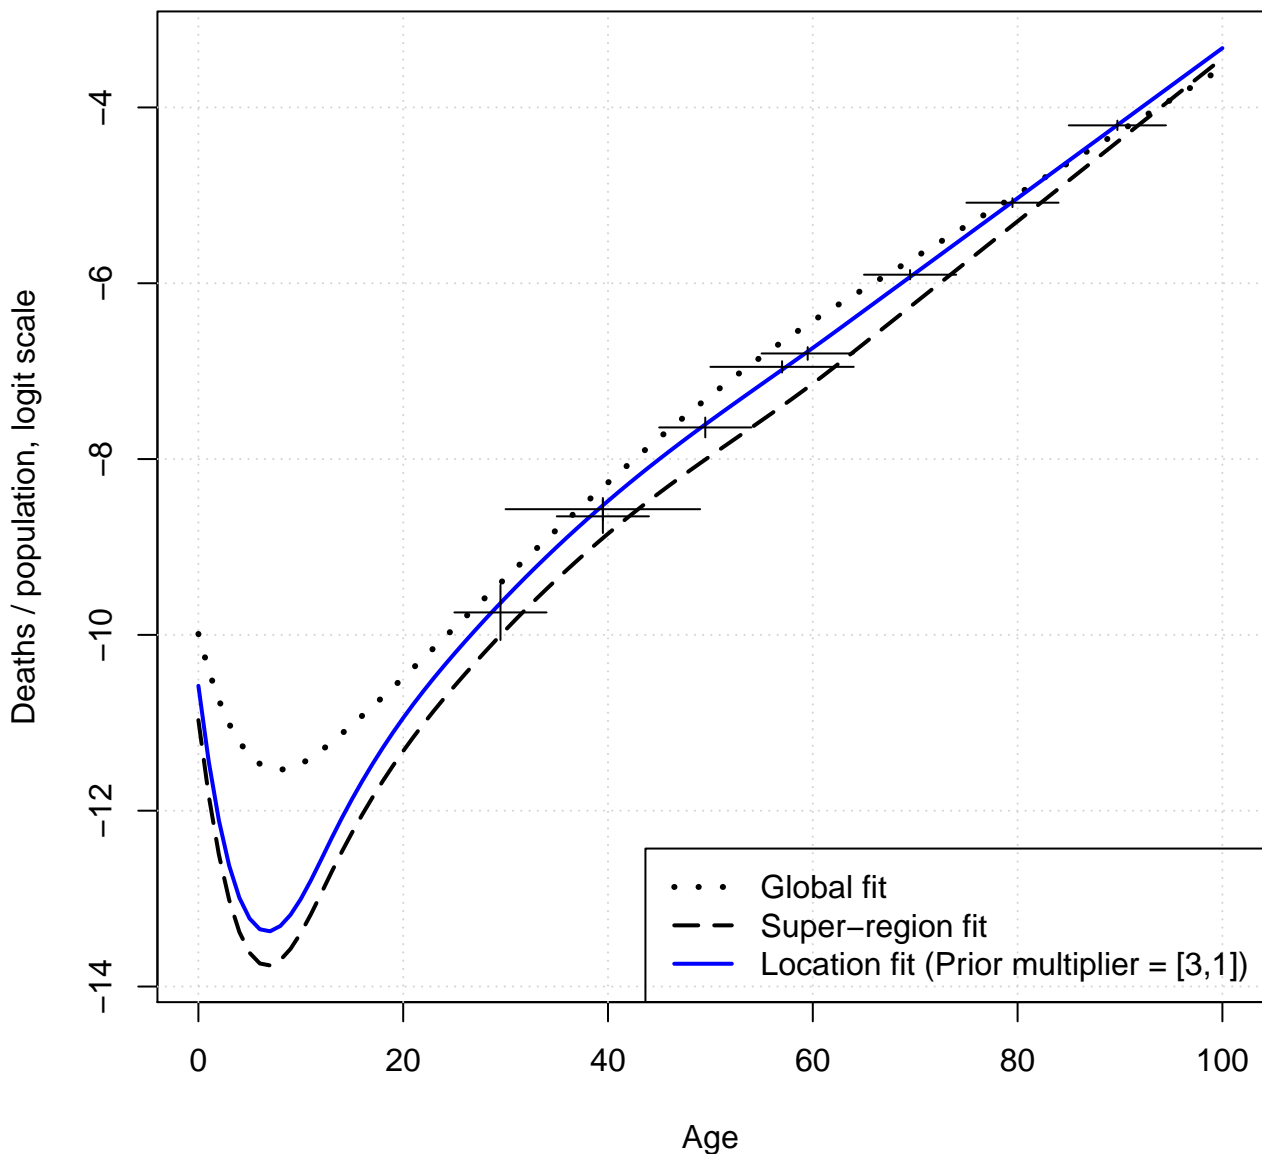

# Alaska

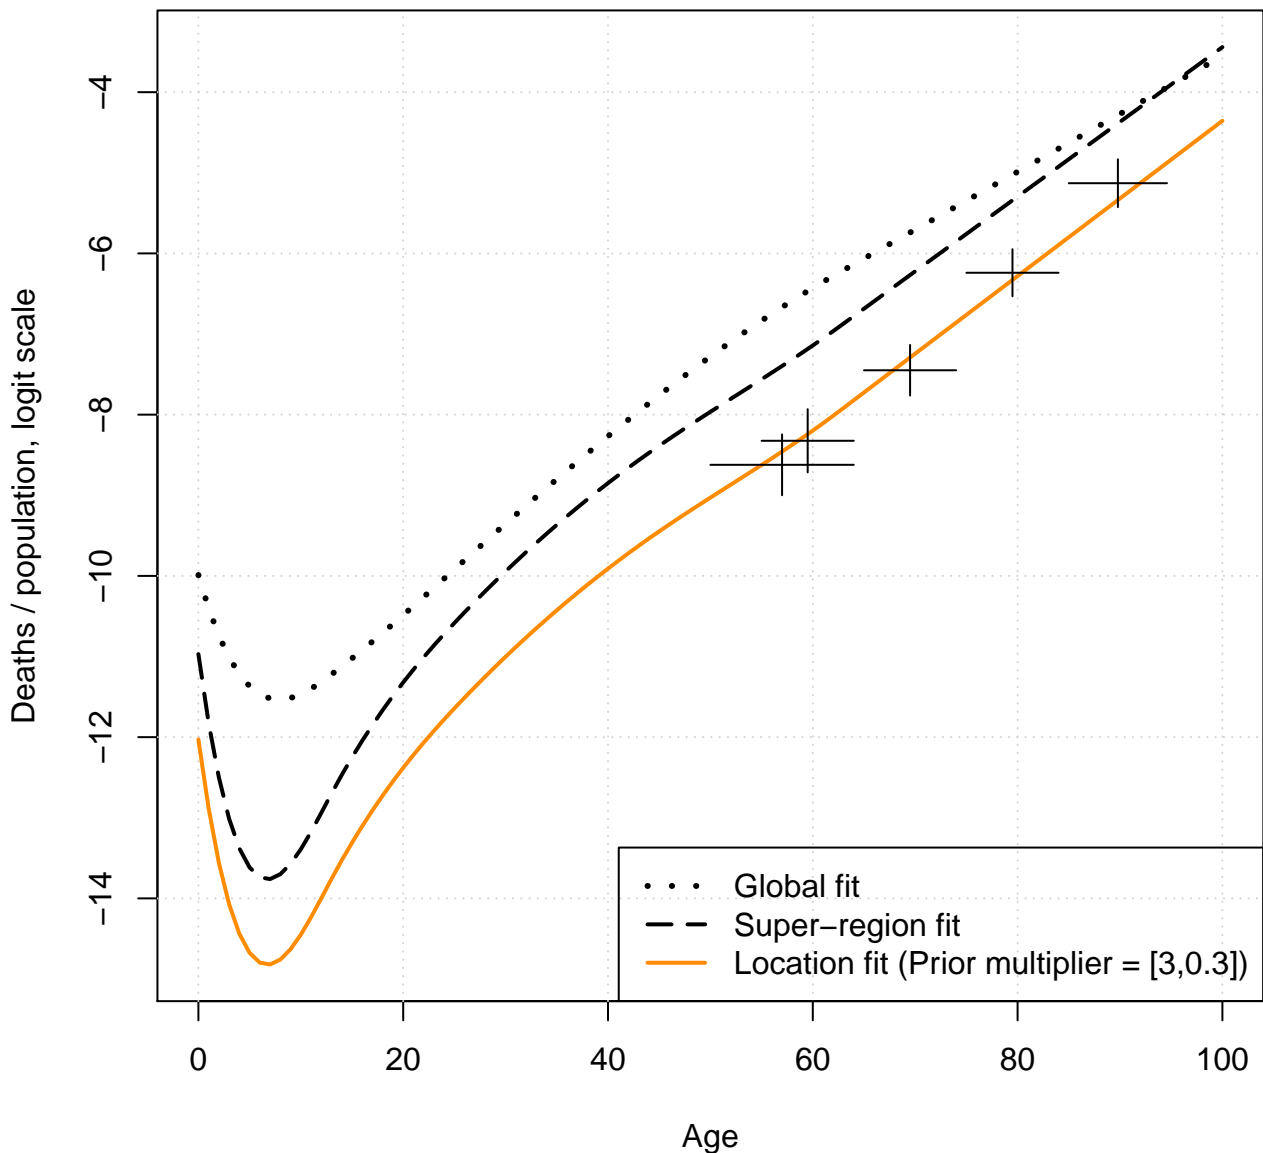

# Arizona

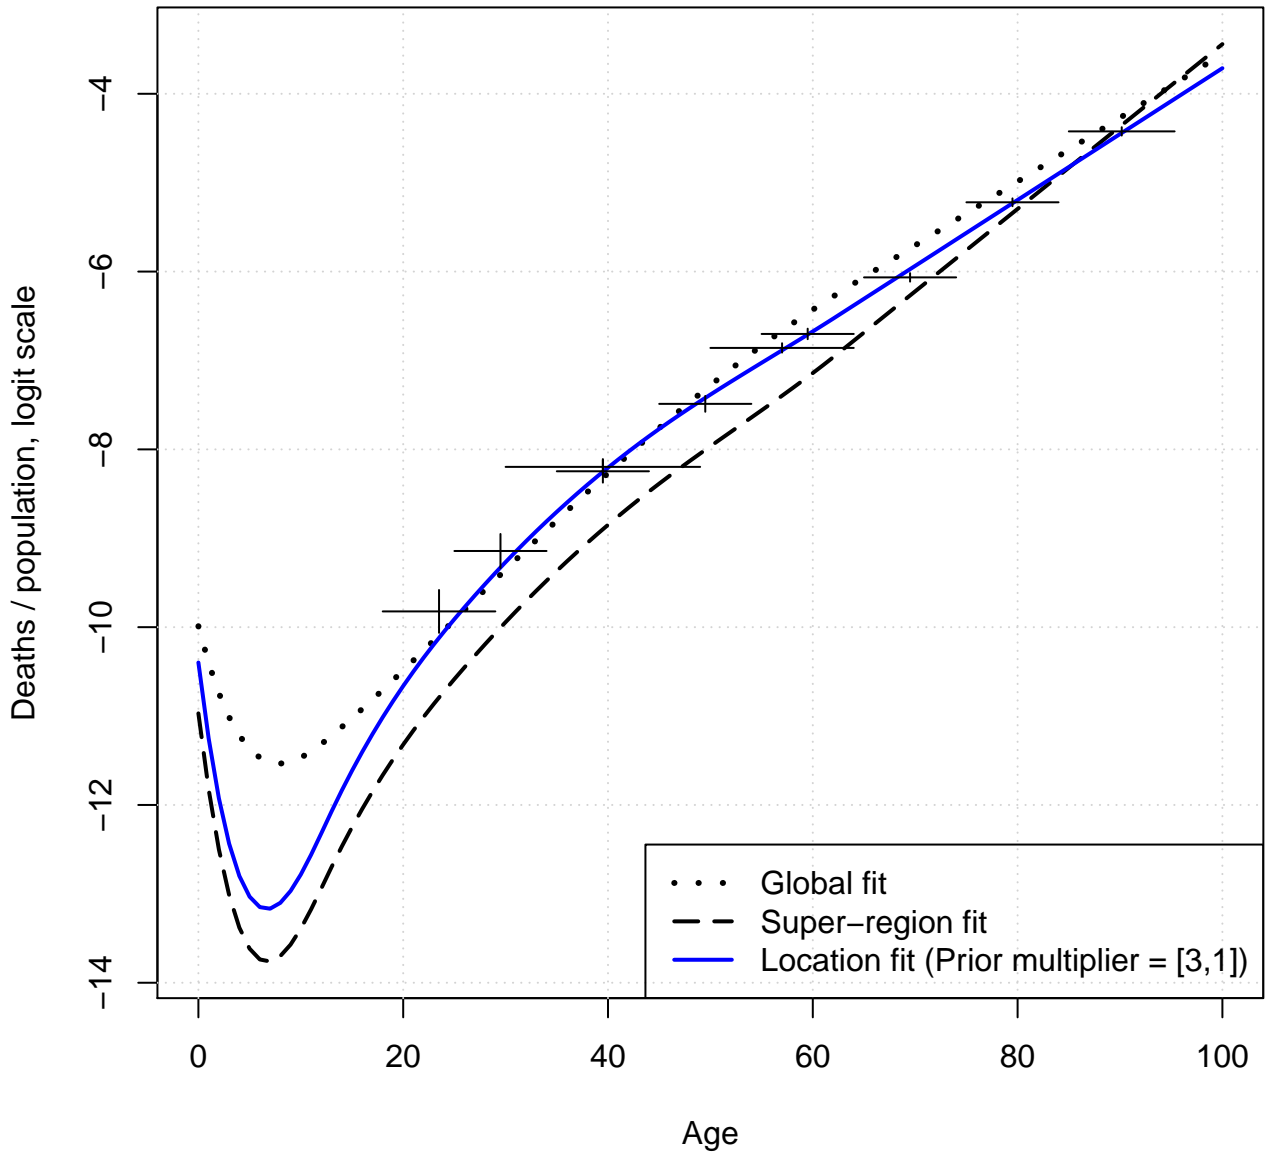

# Arkansas

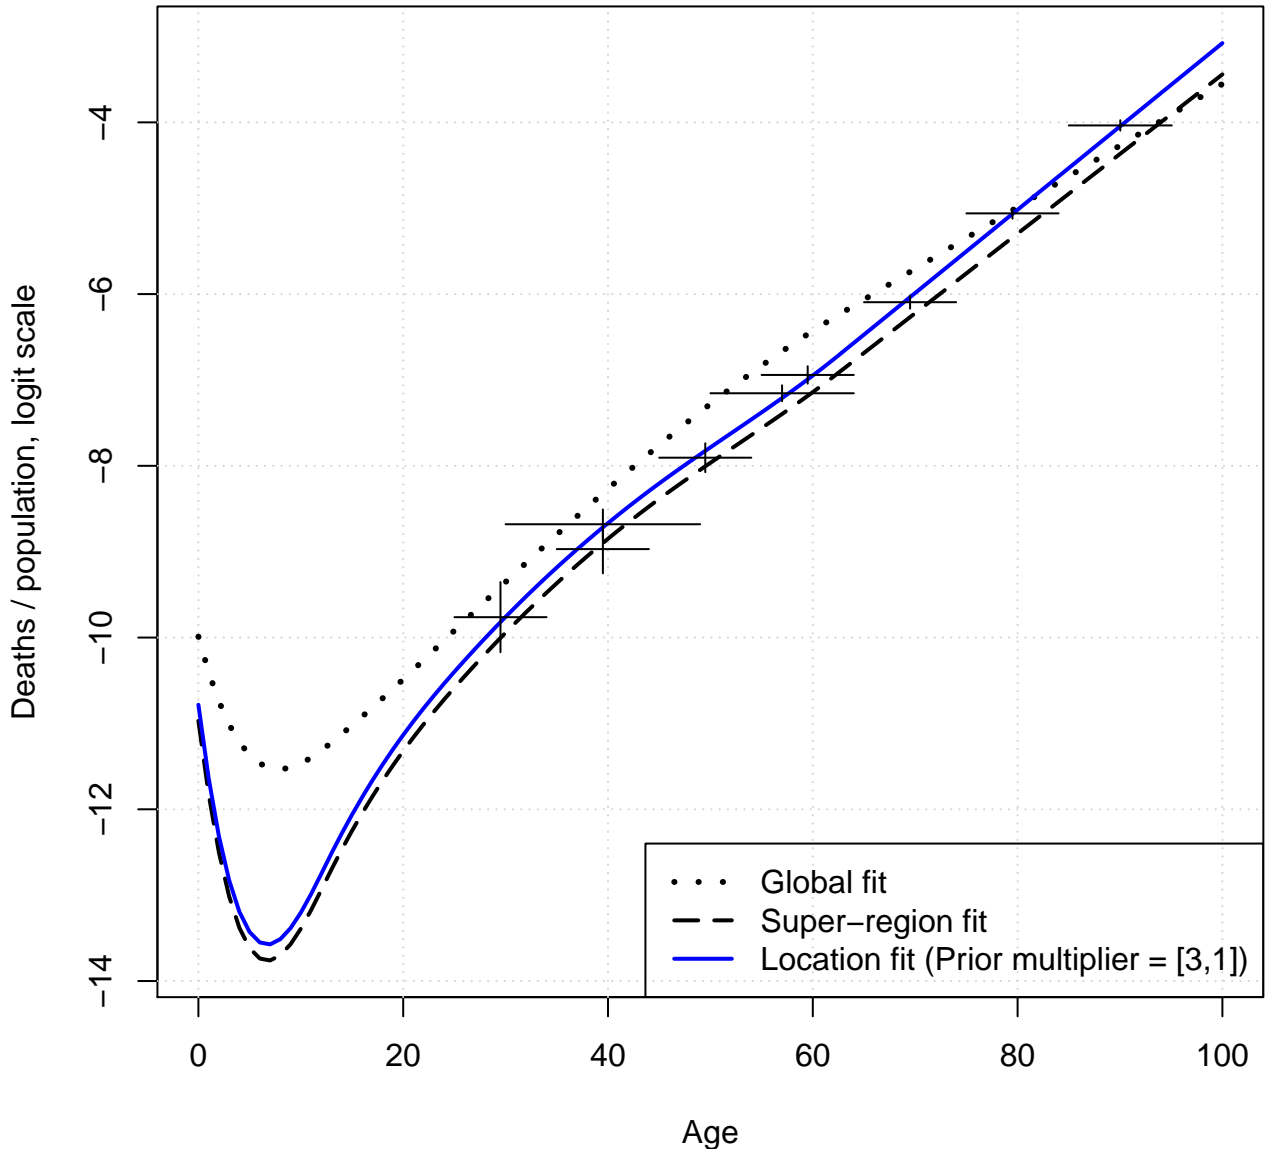

# California

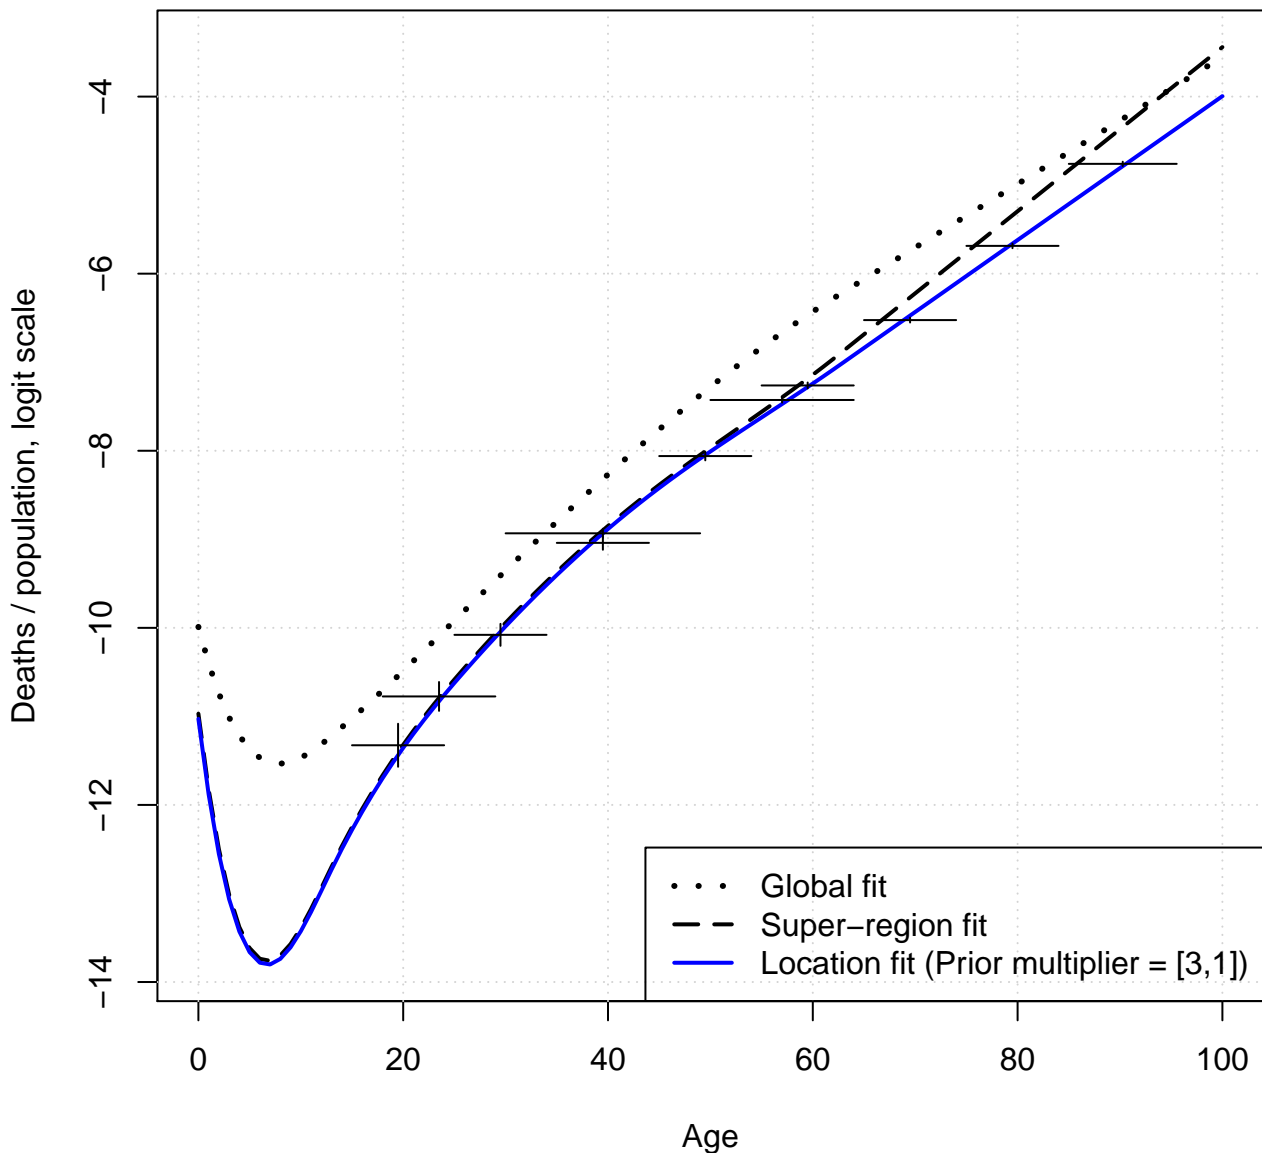

# Colorado

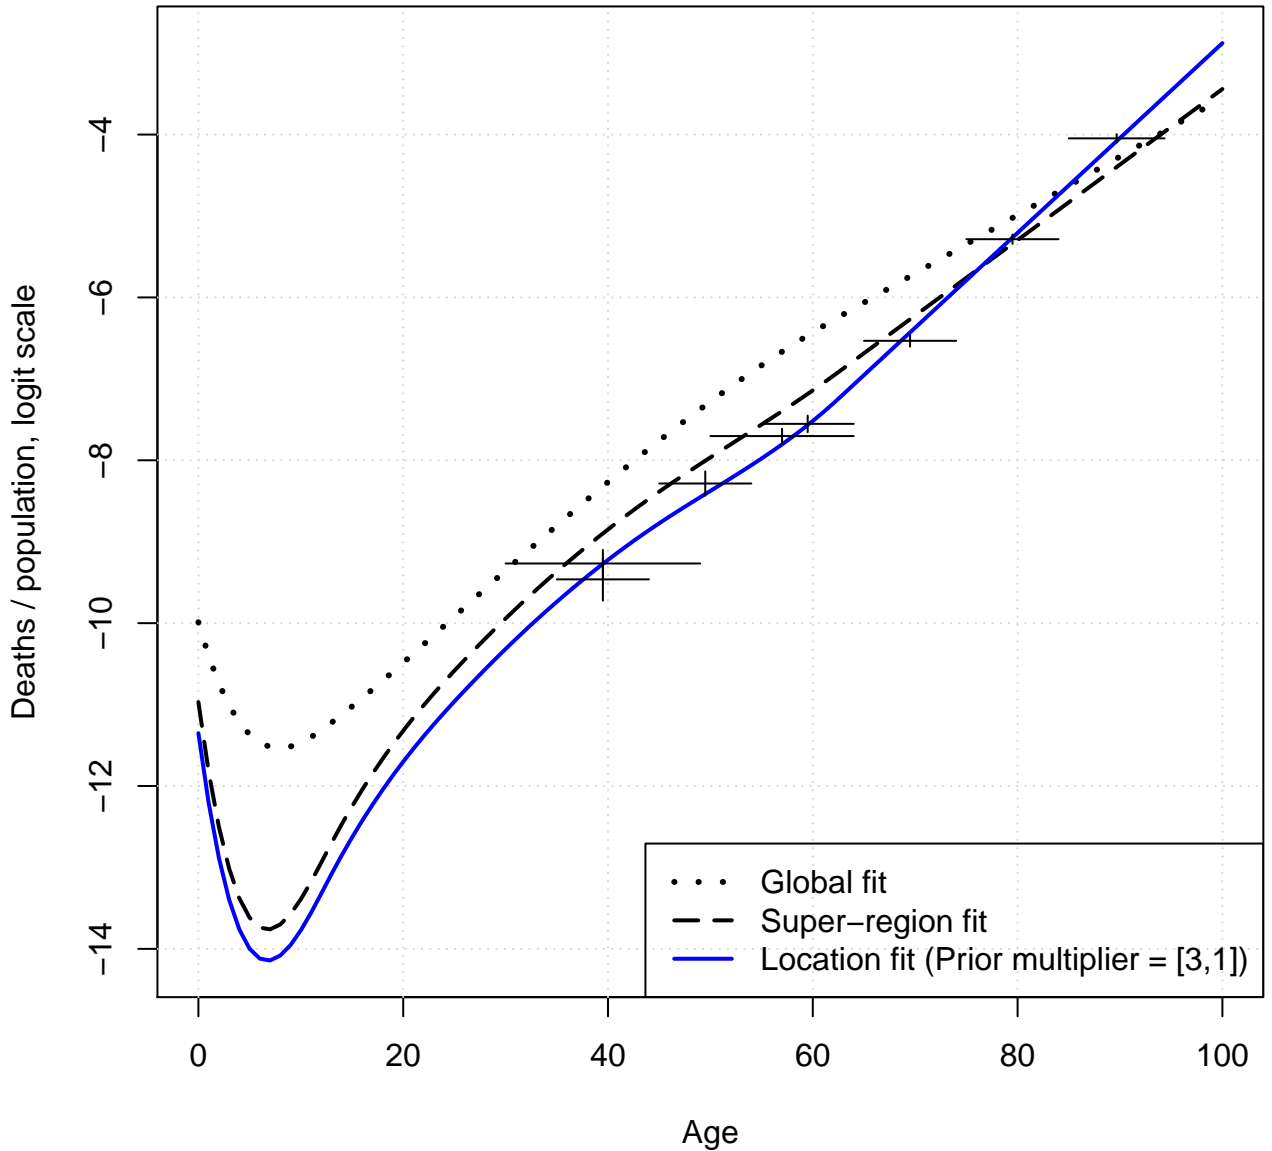



# Connecticut

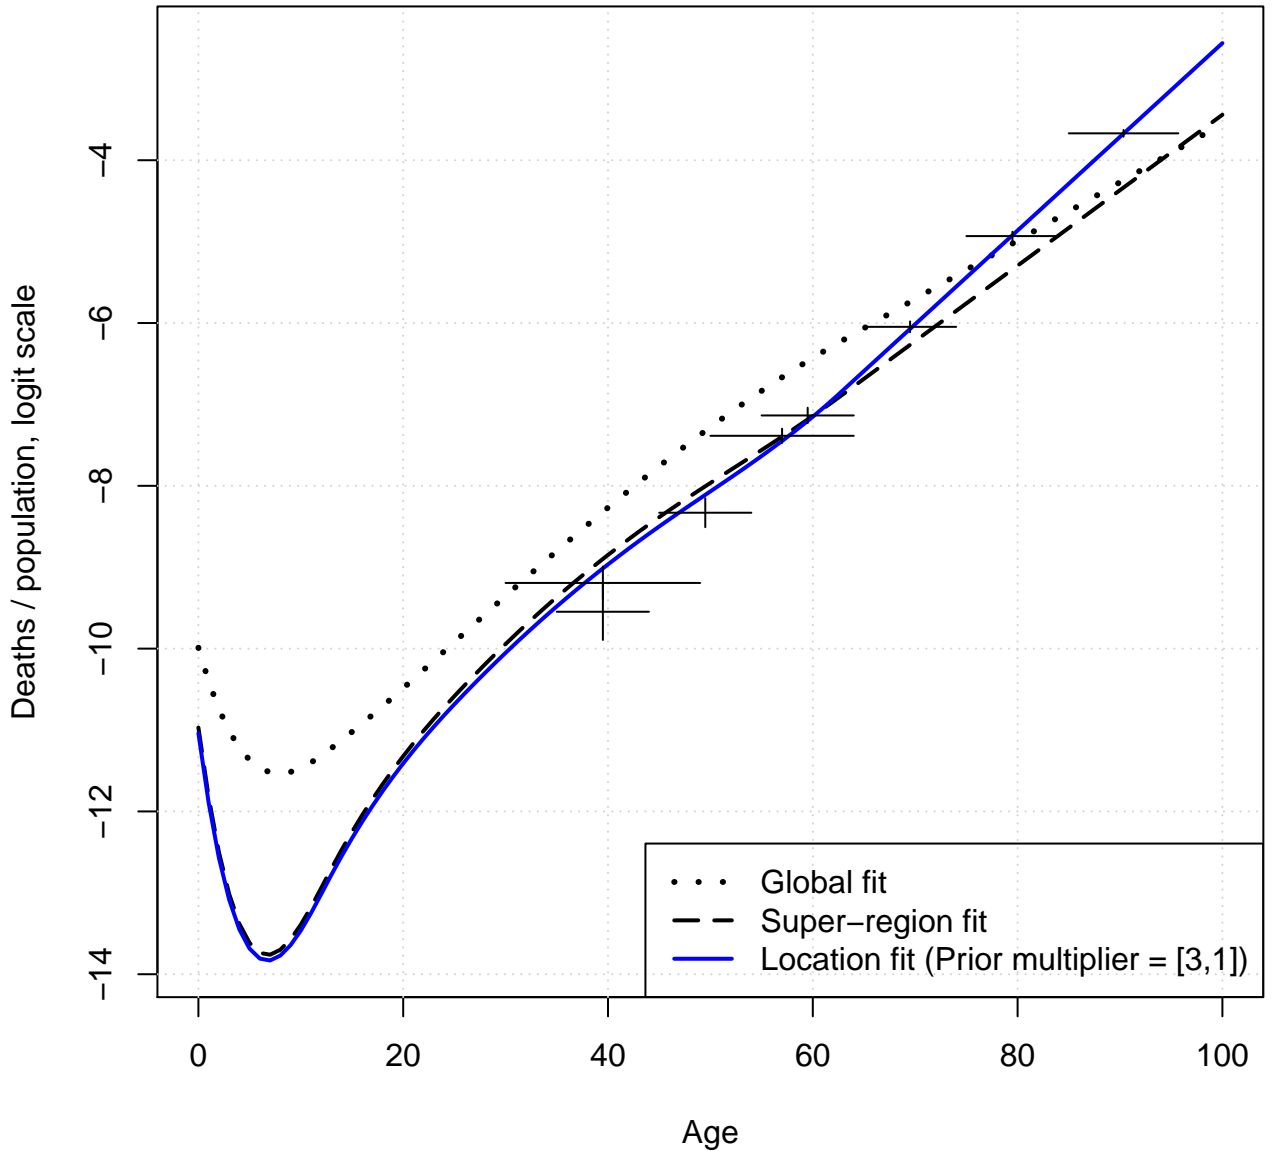

# Delaware

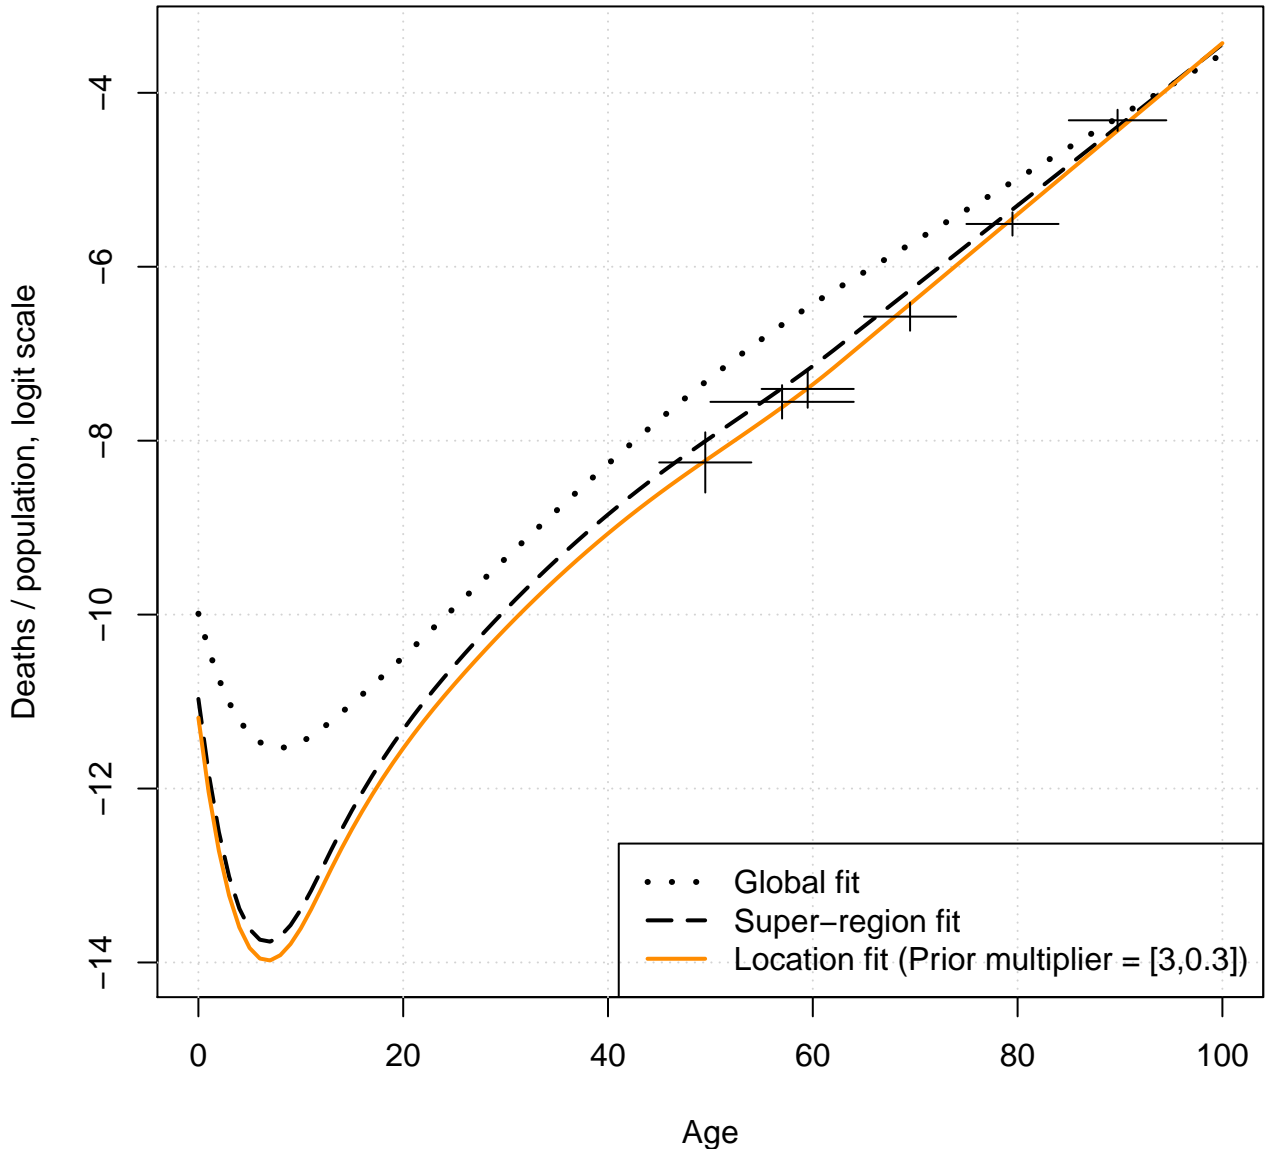

# District of Columbia

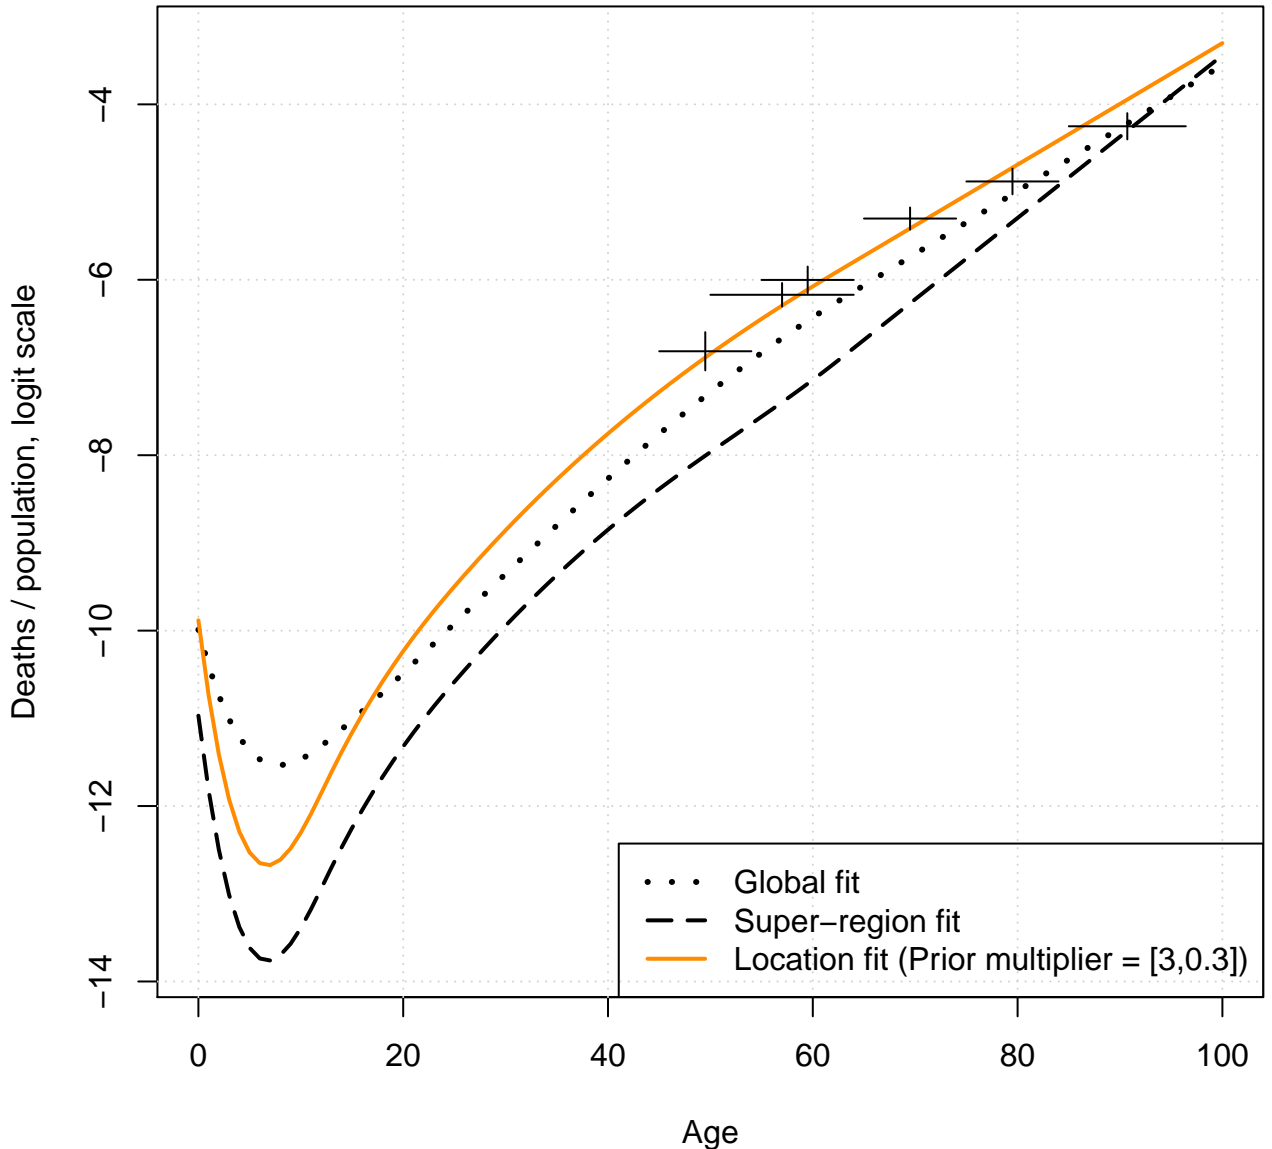

# Florida

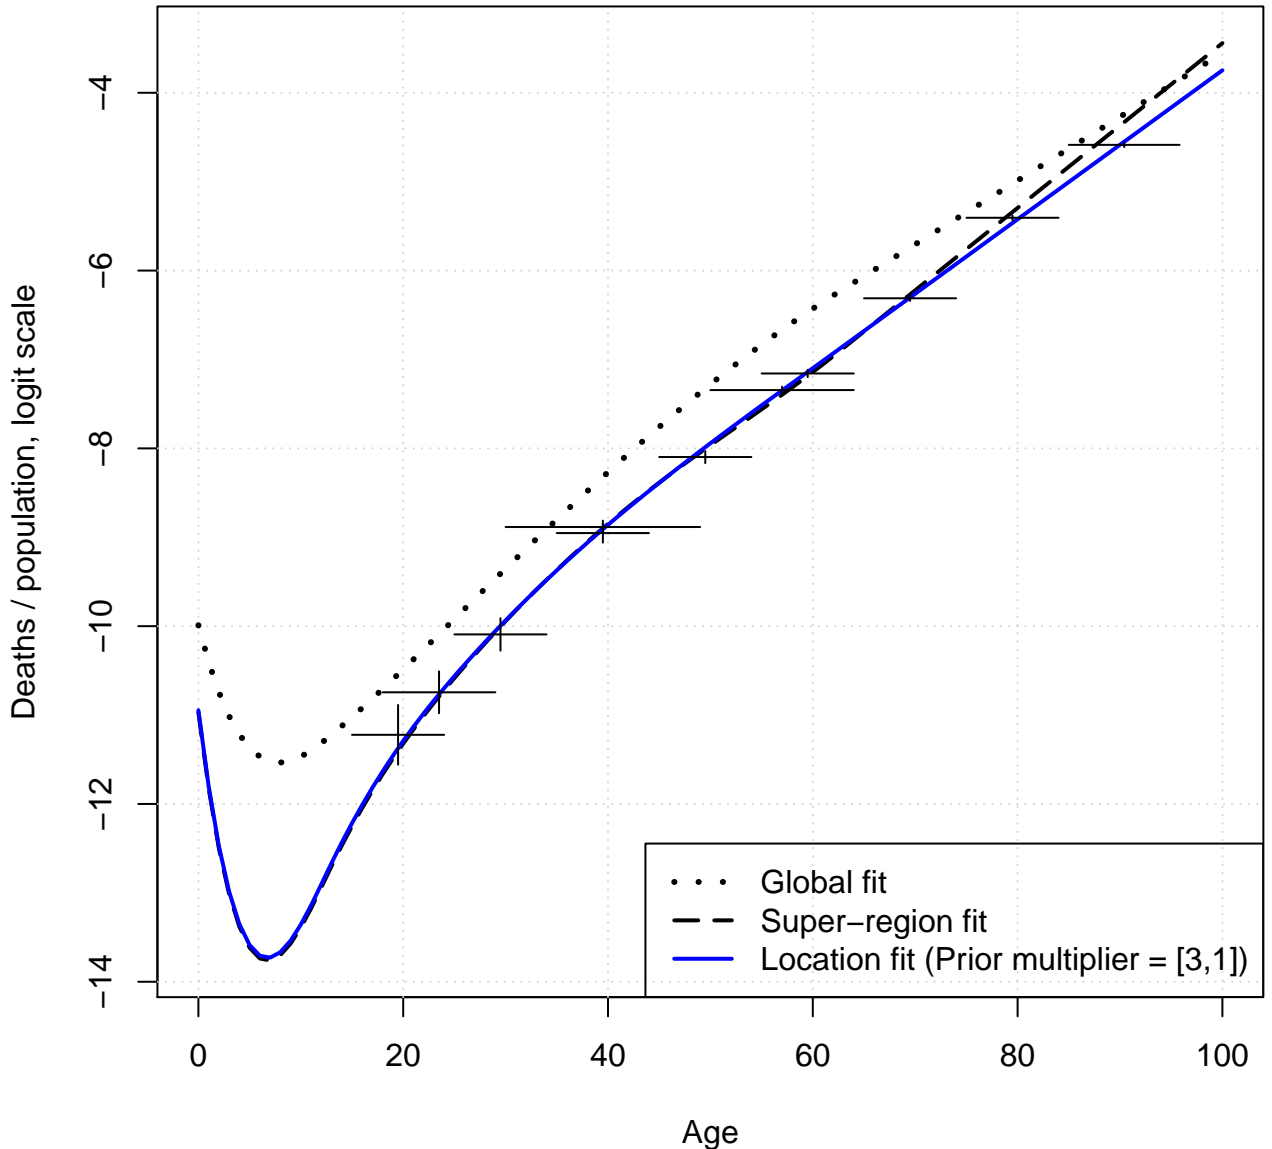

# Georgia

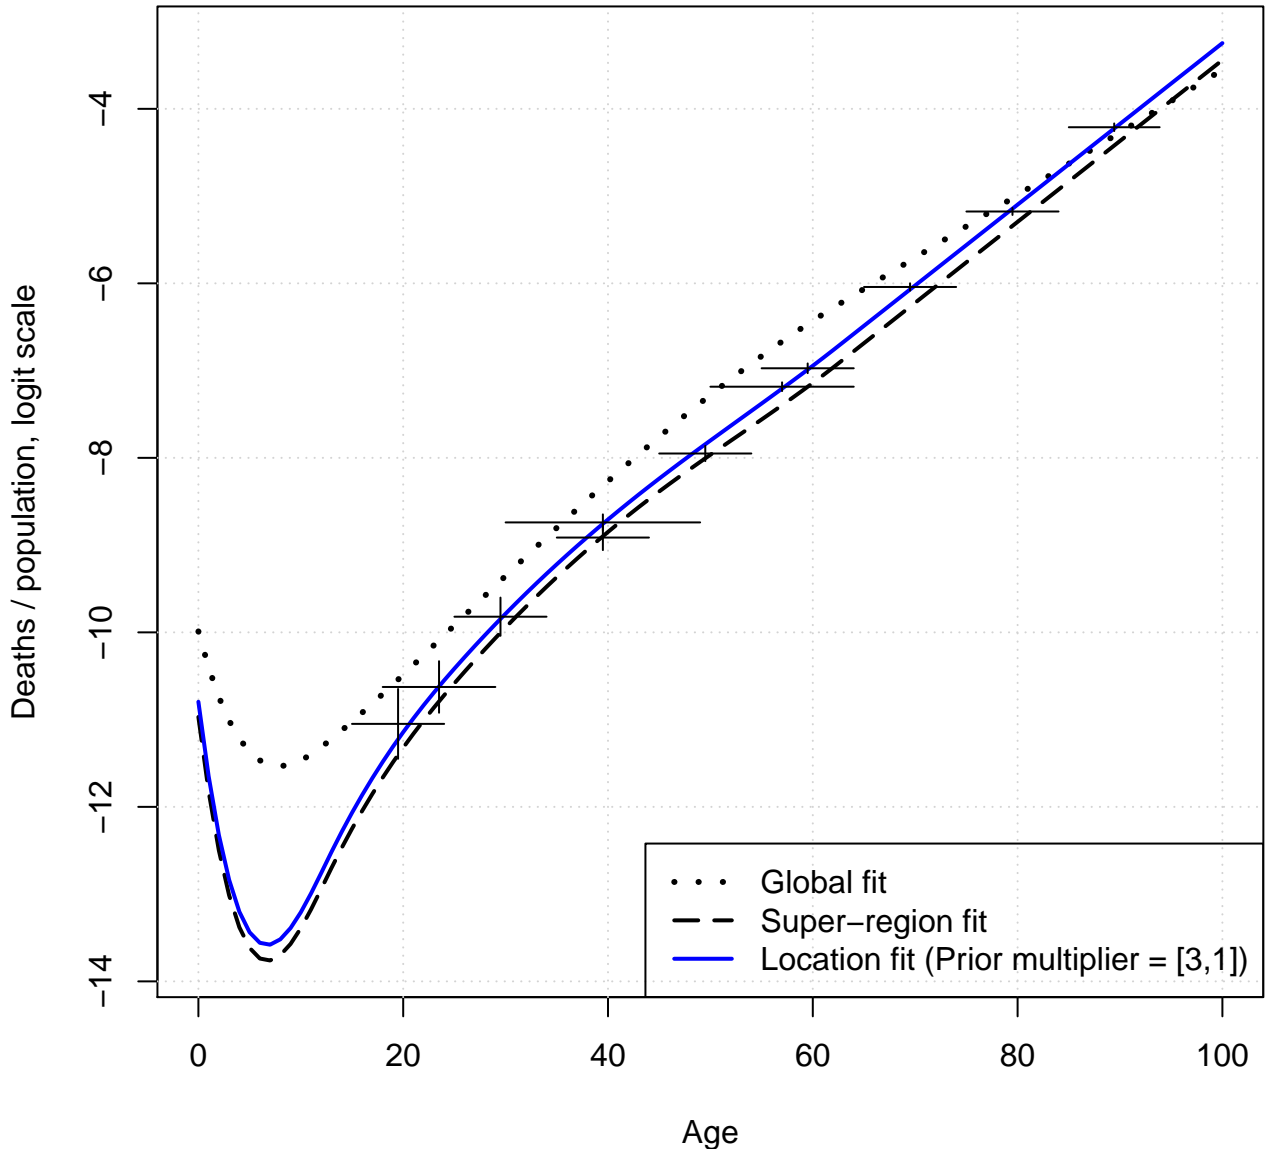

# Hawaii

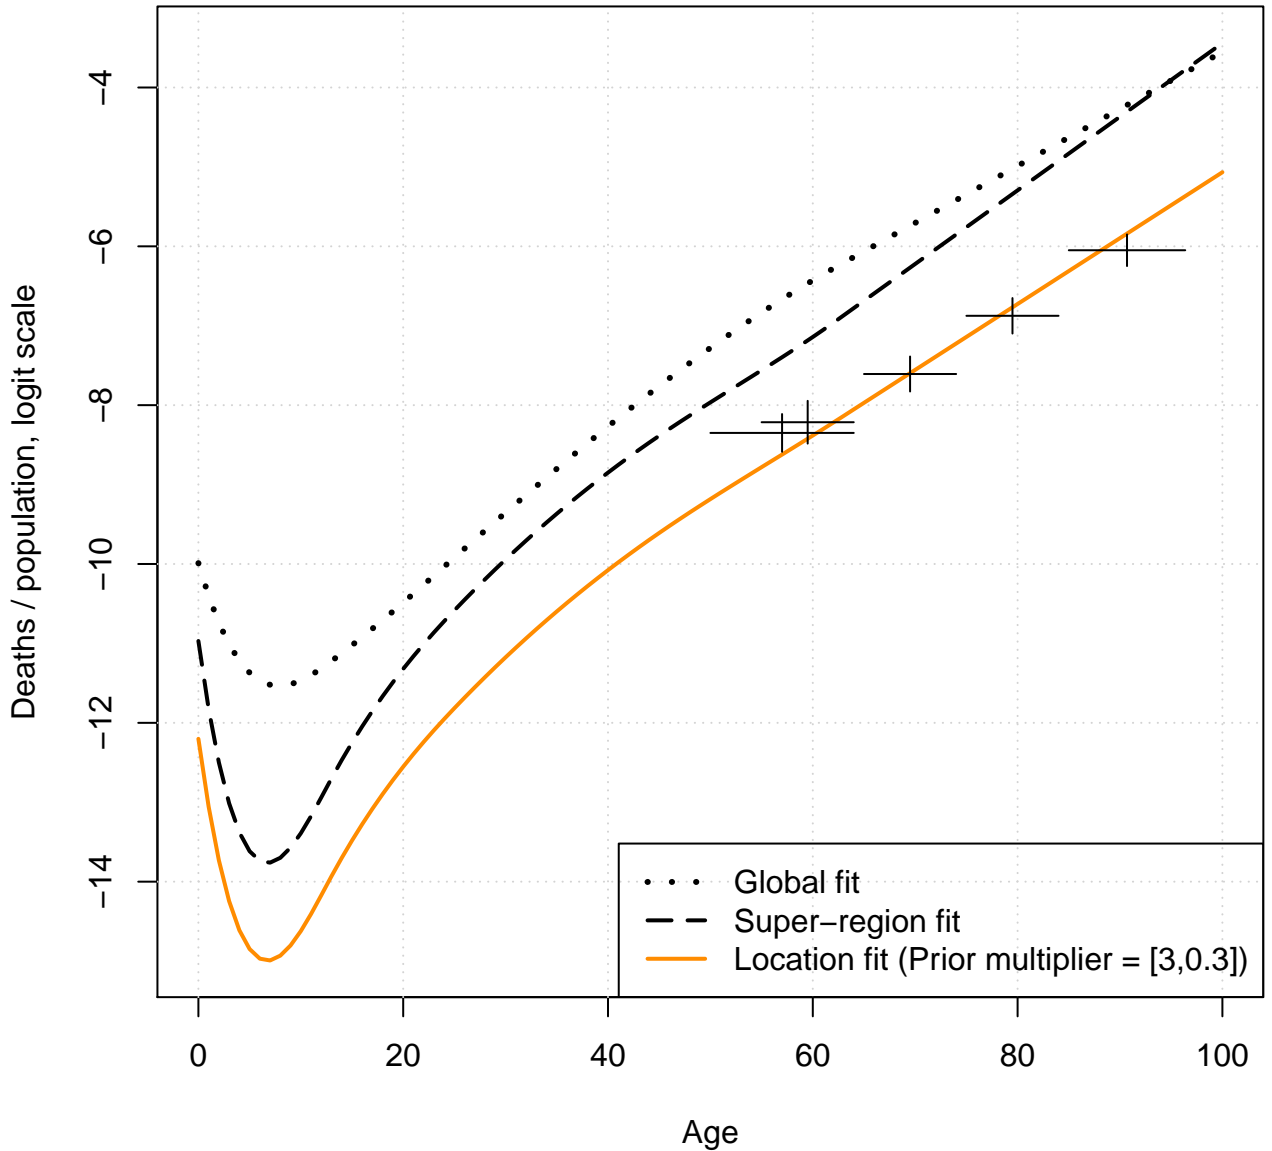

# Idaho

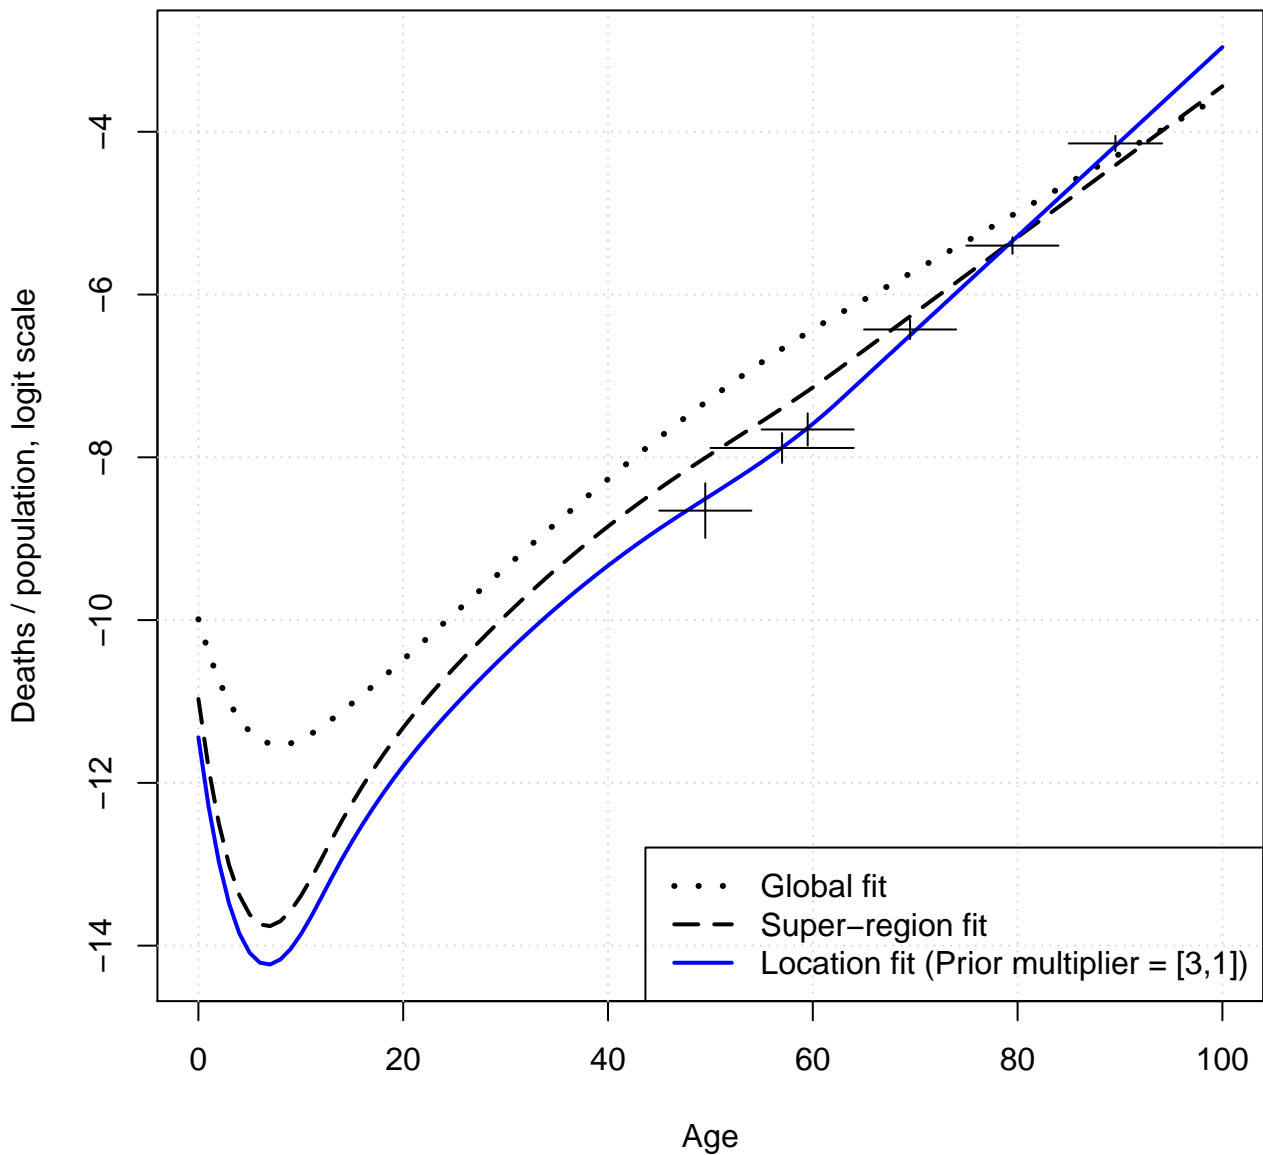

# Illinois

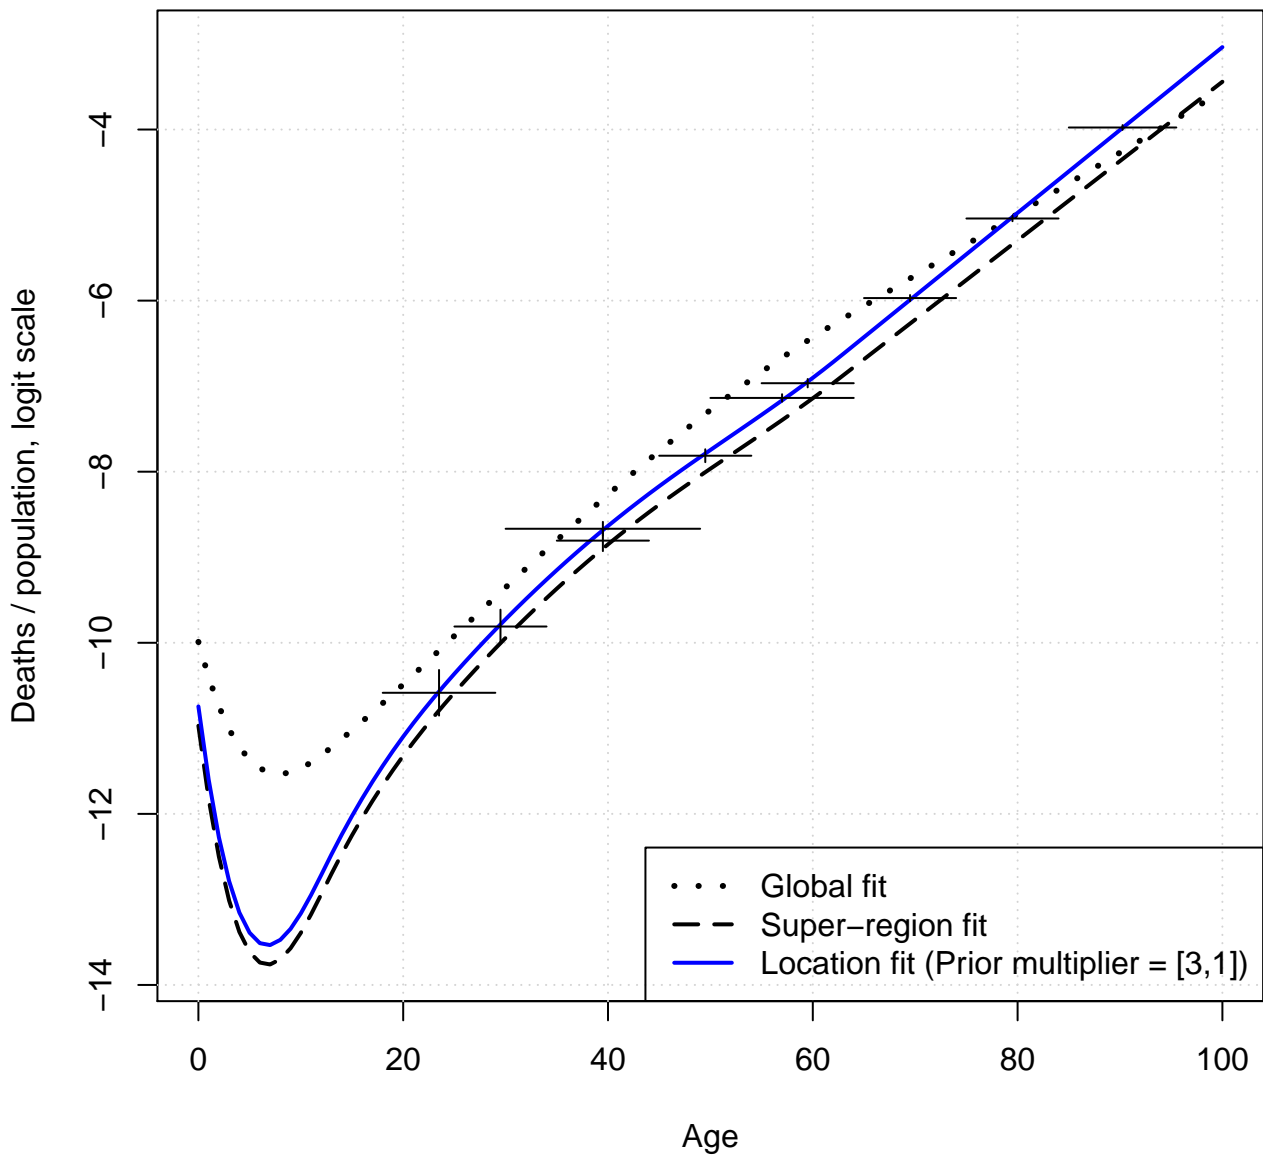



# Indiana

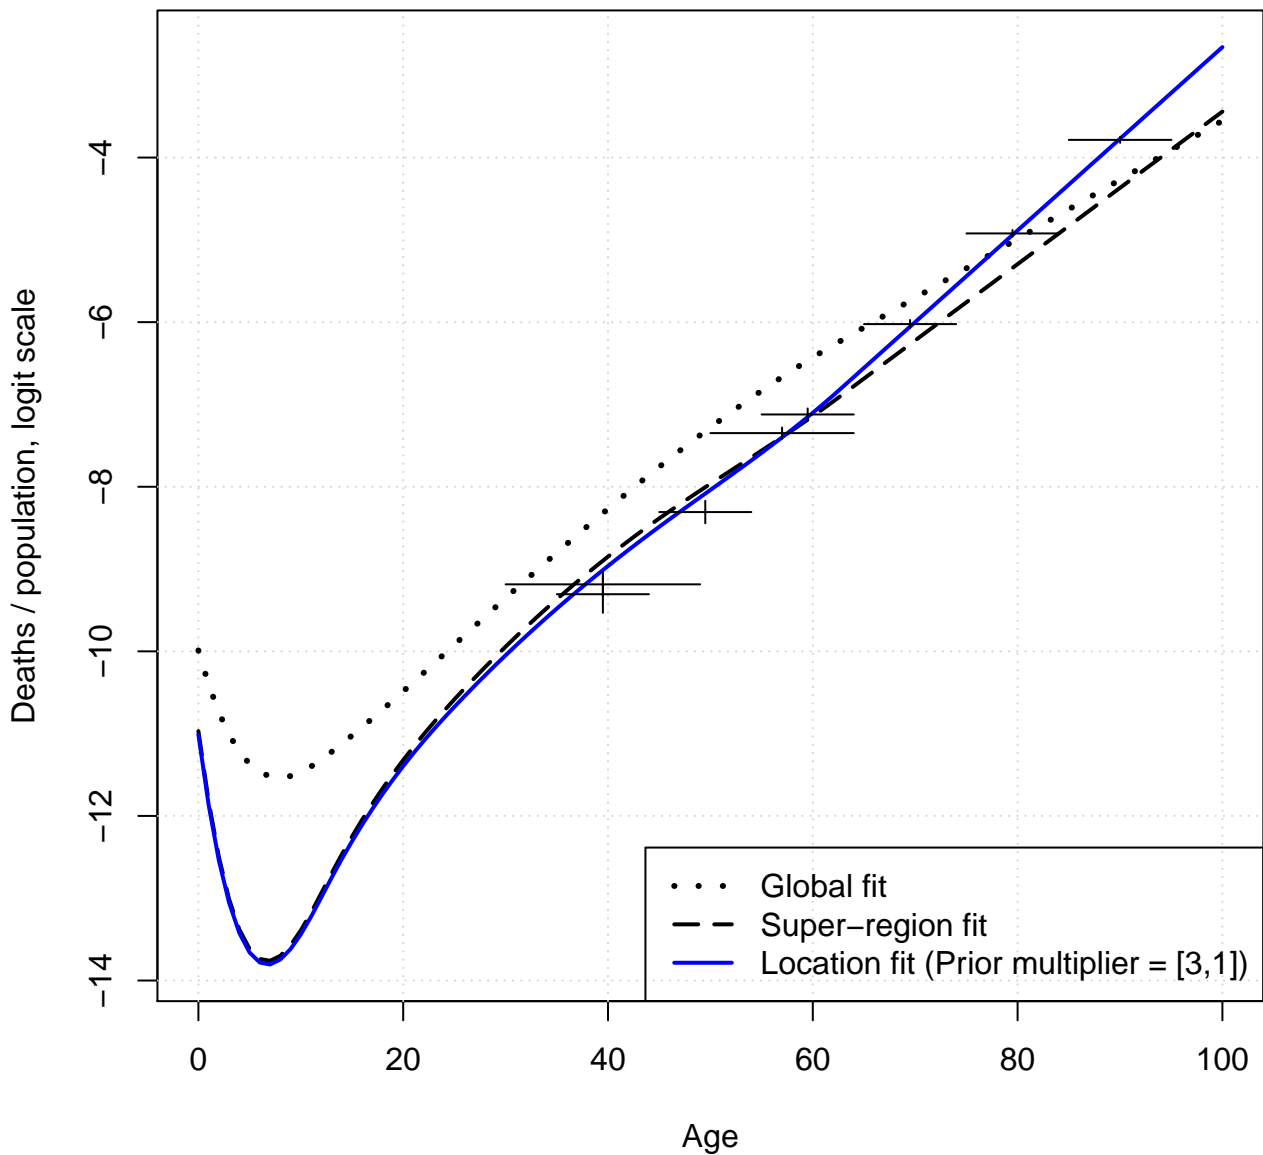

# Iowa

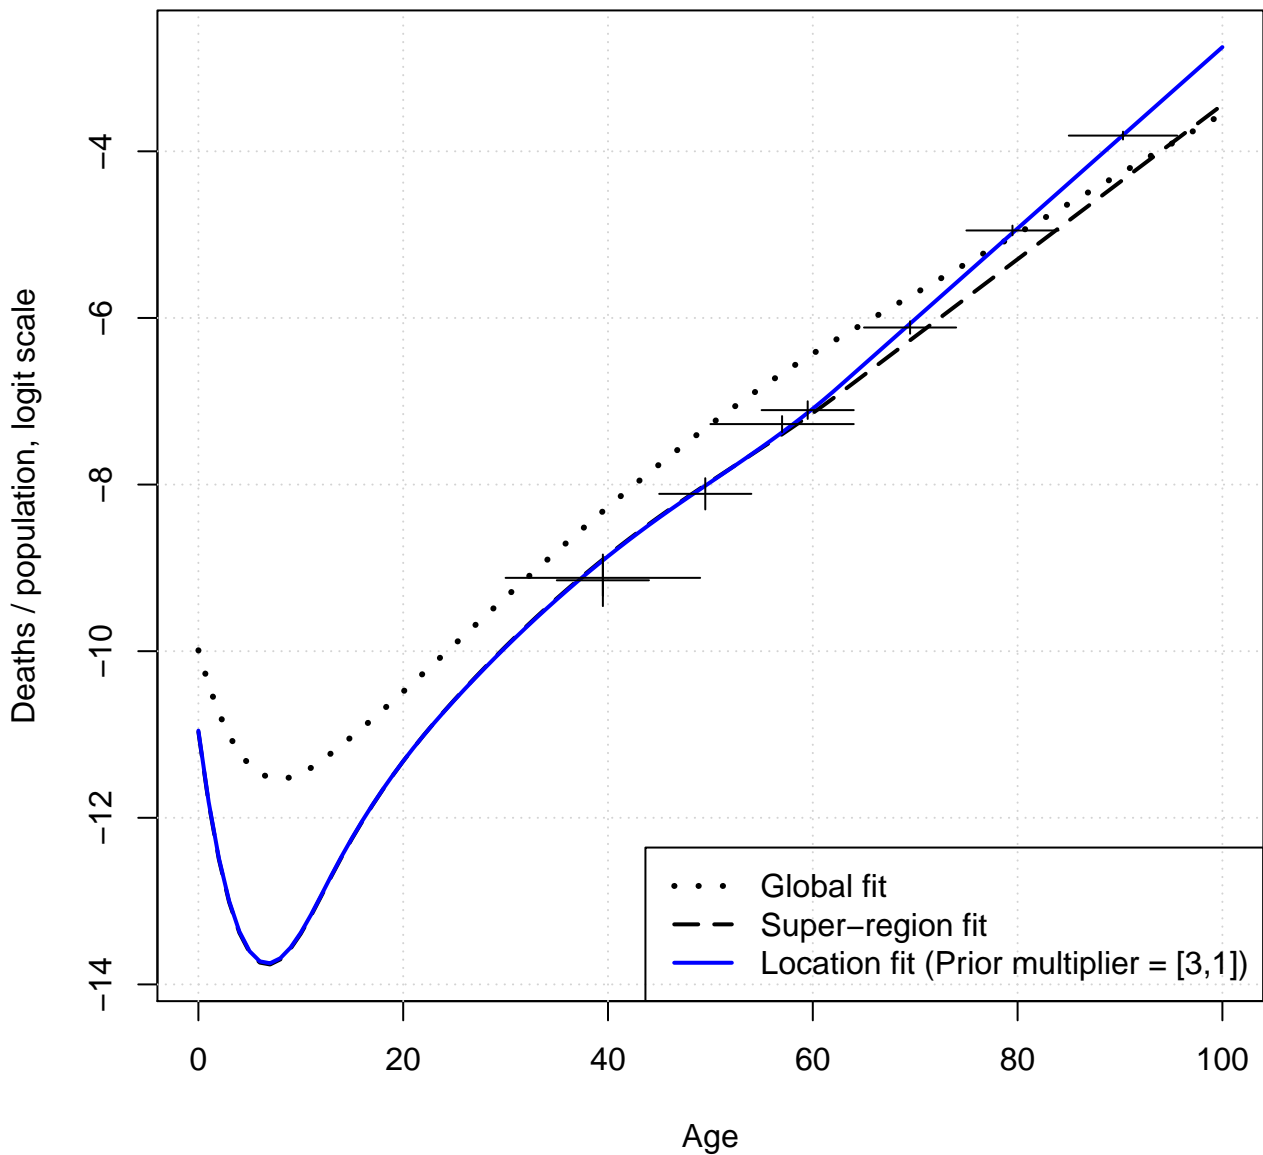

# Kansas

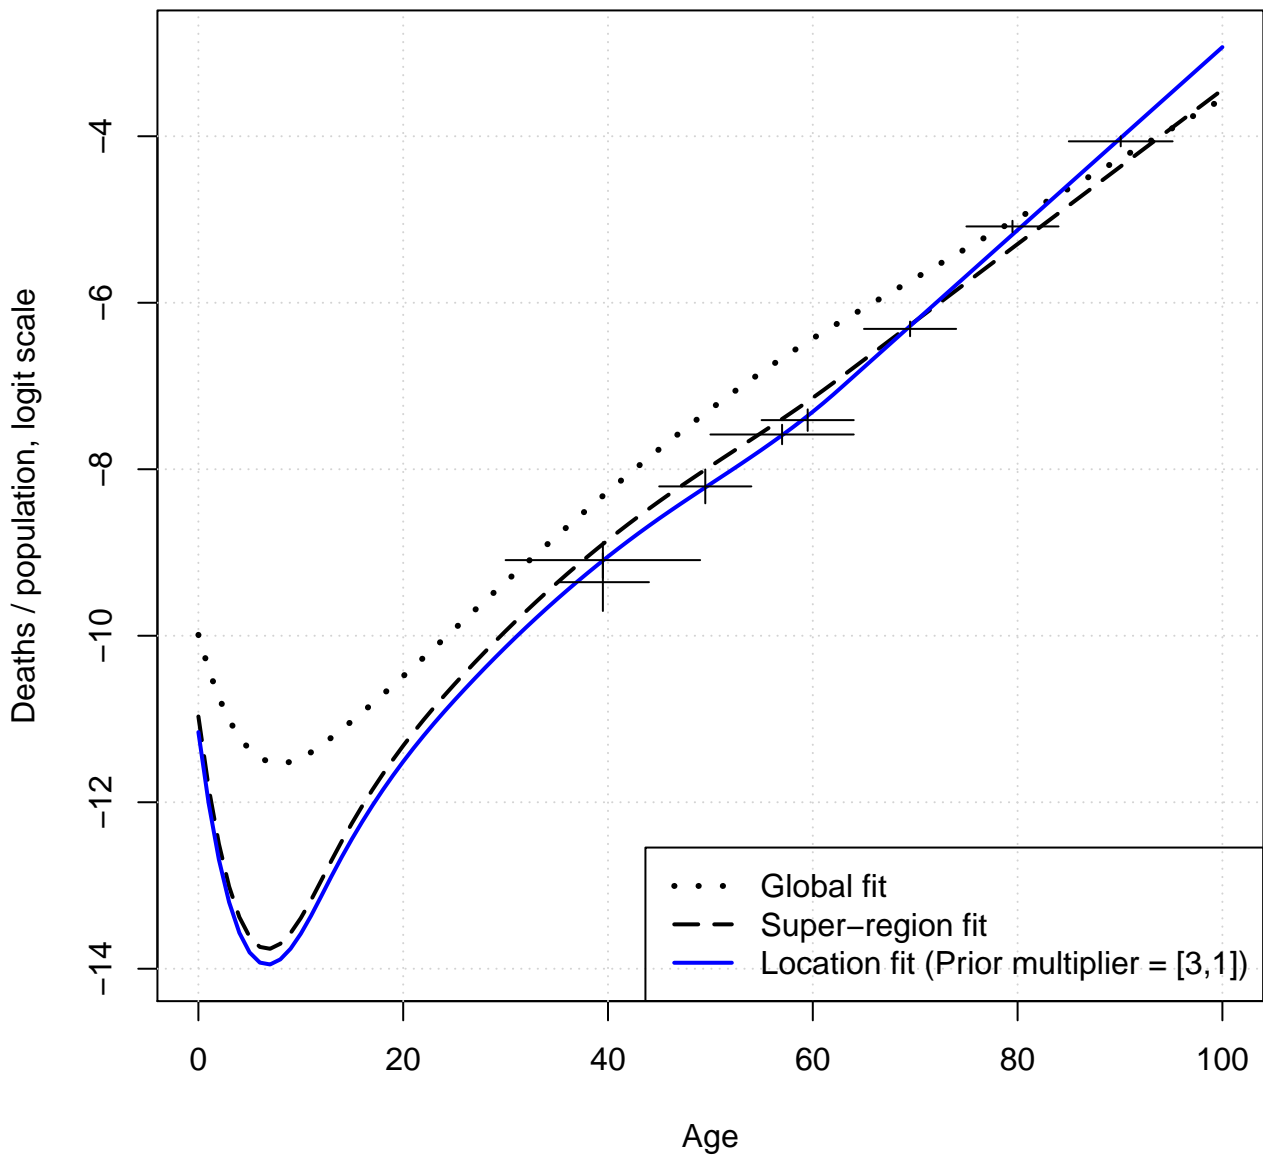

# Kentucky

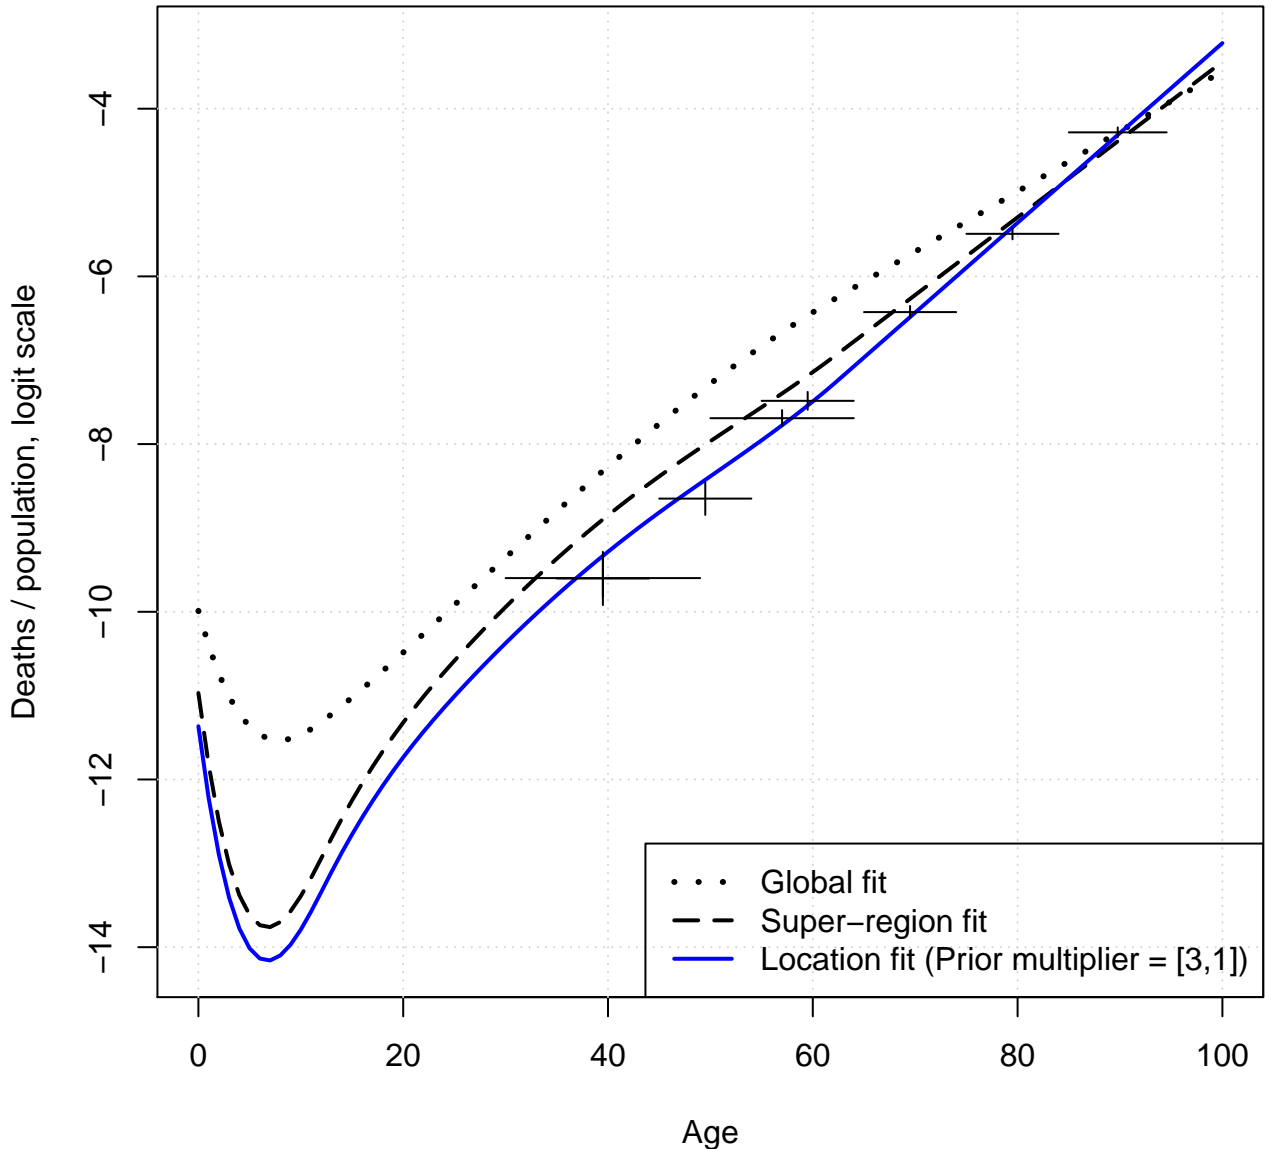

# Louisiana

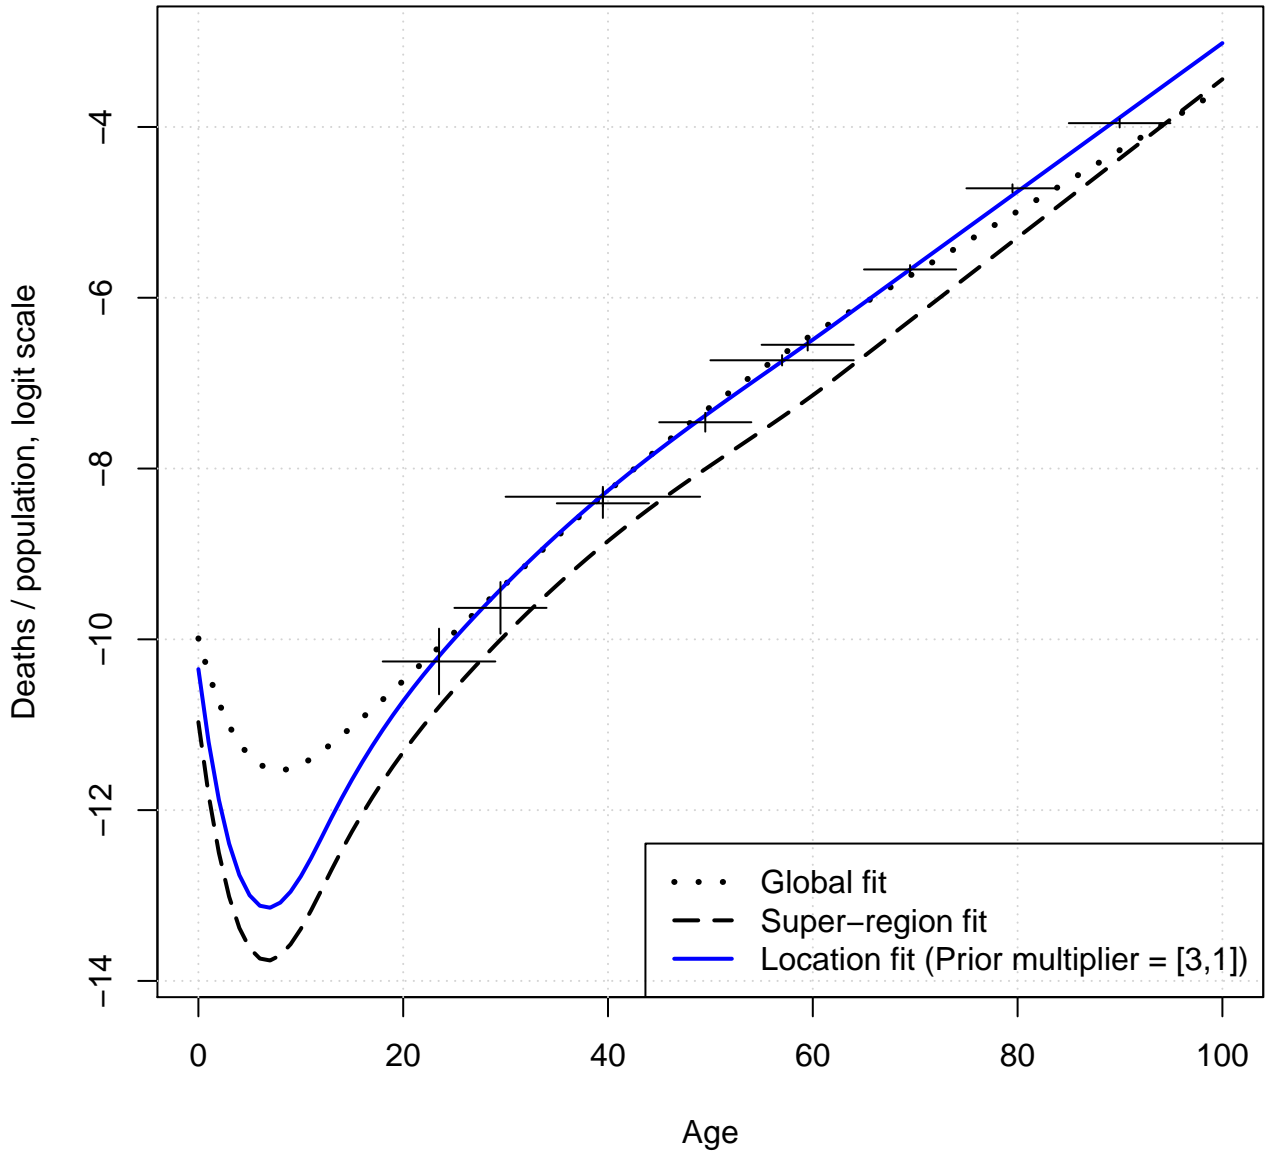

# Maine

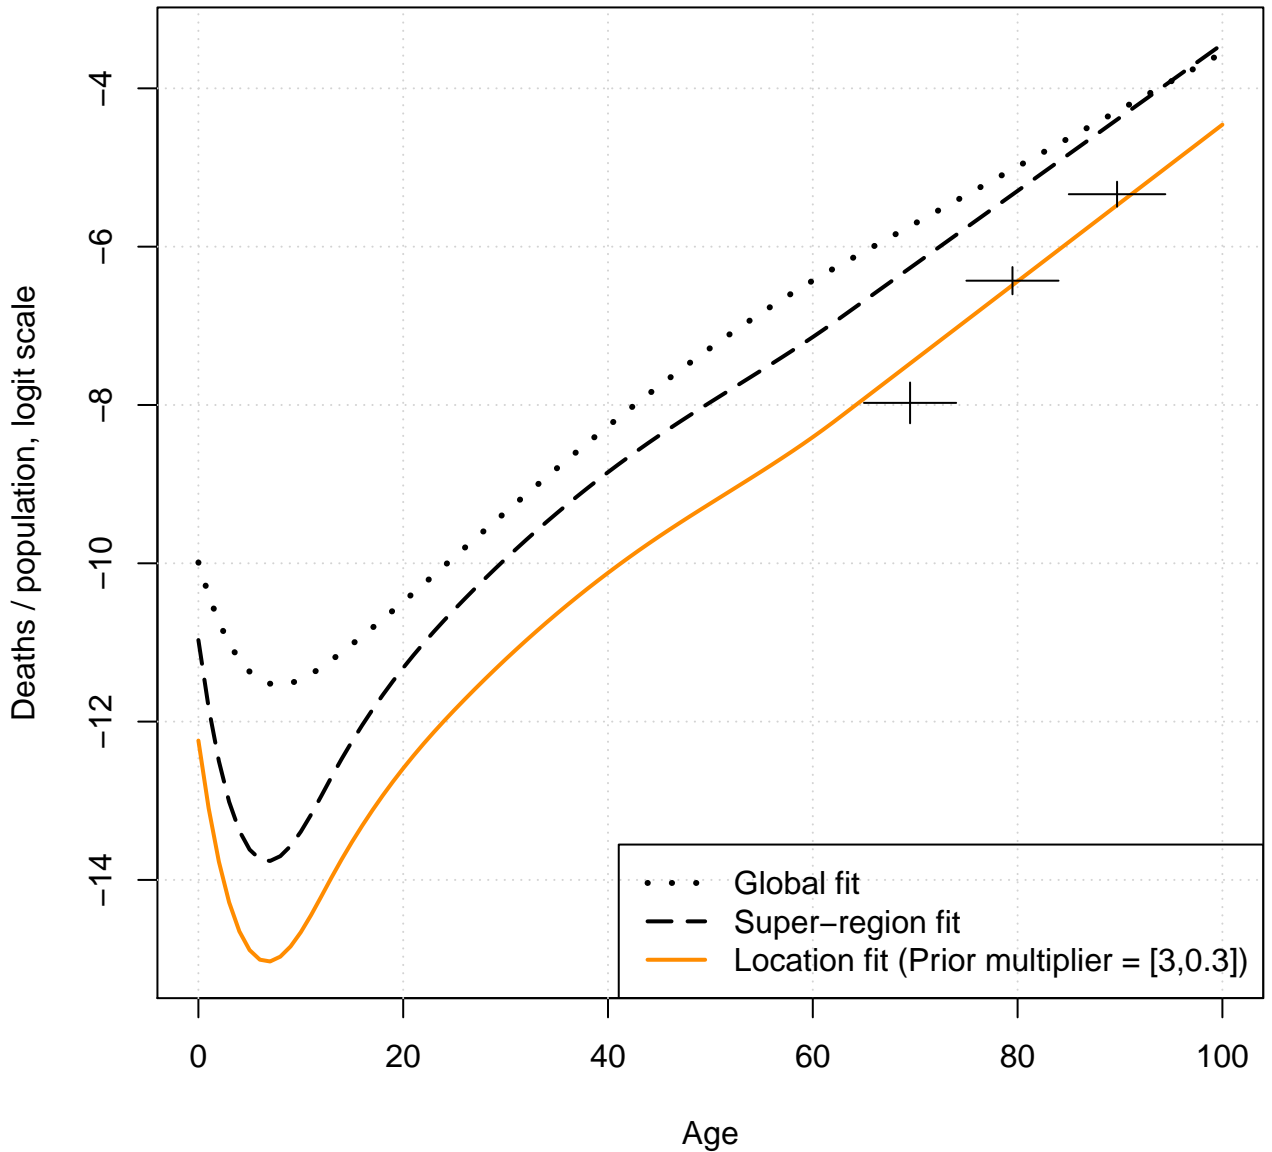

# Maryland

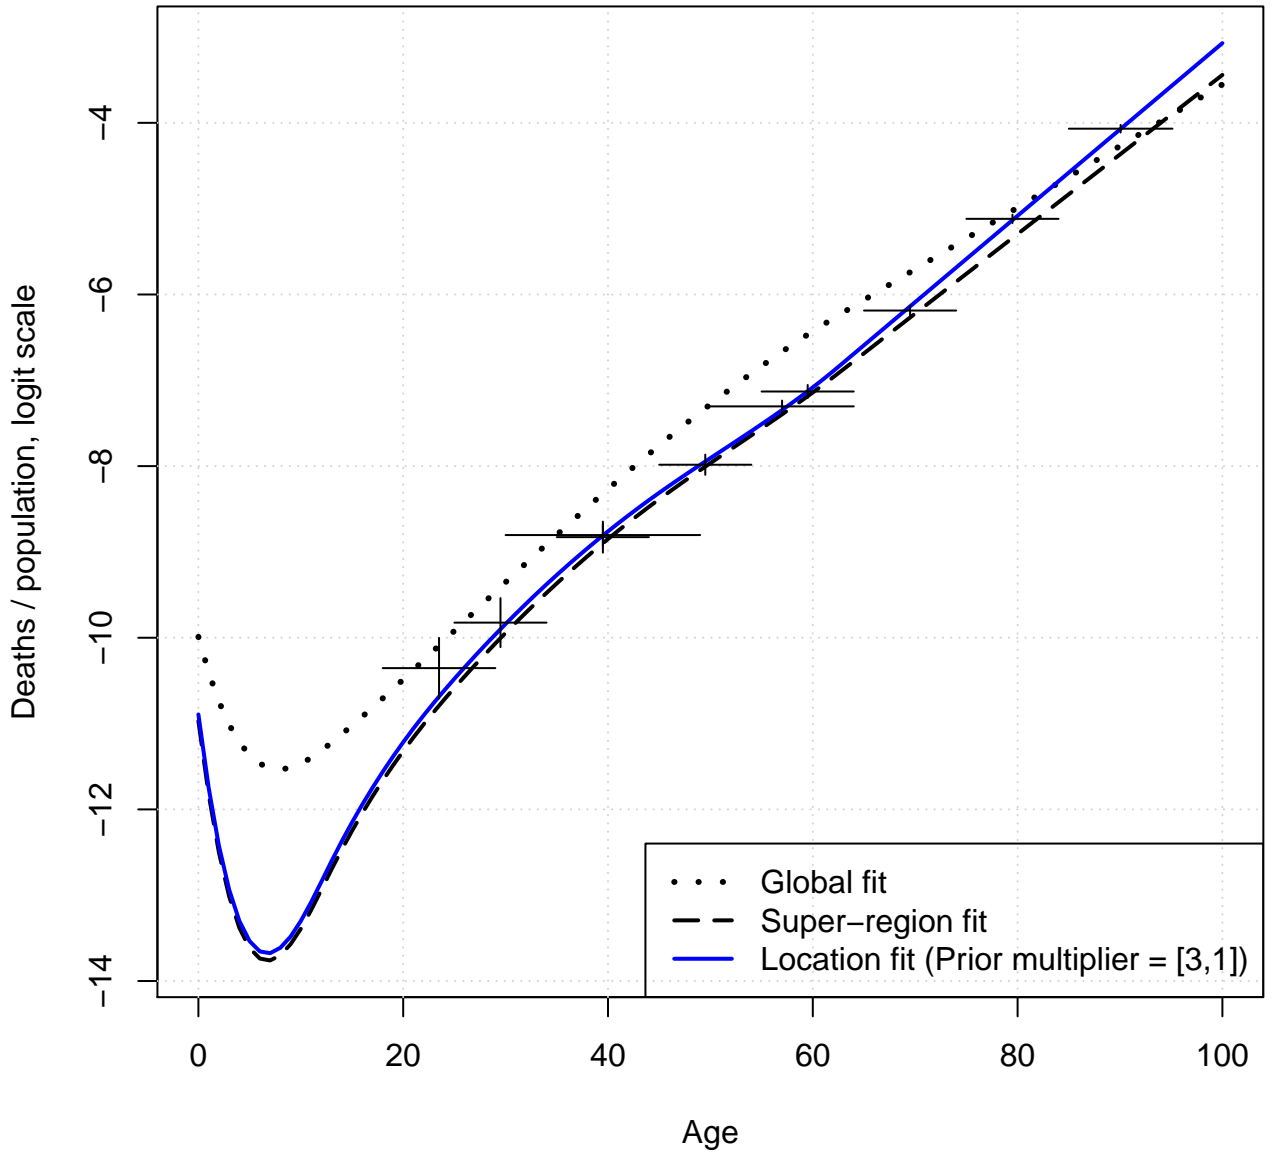

# Massachusetts

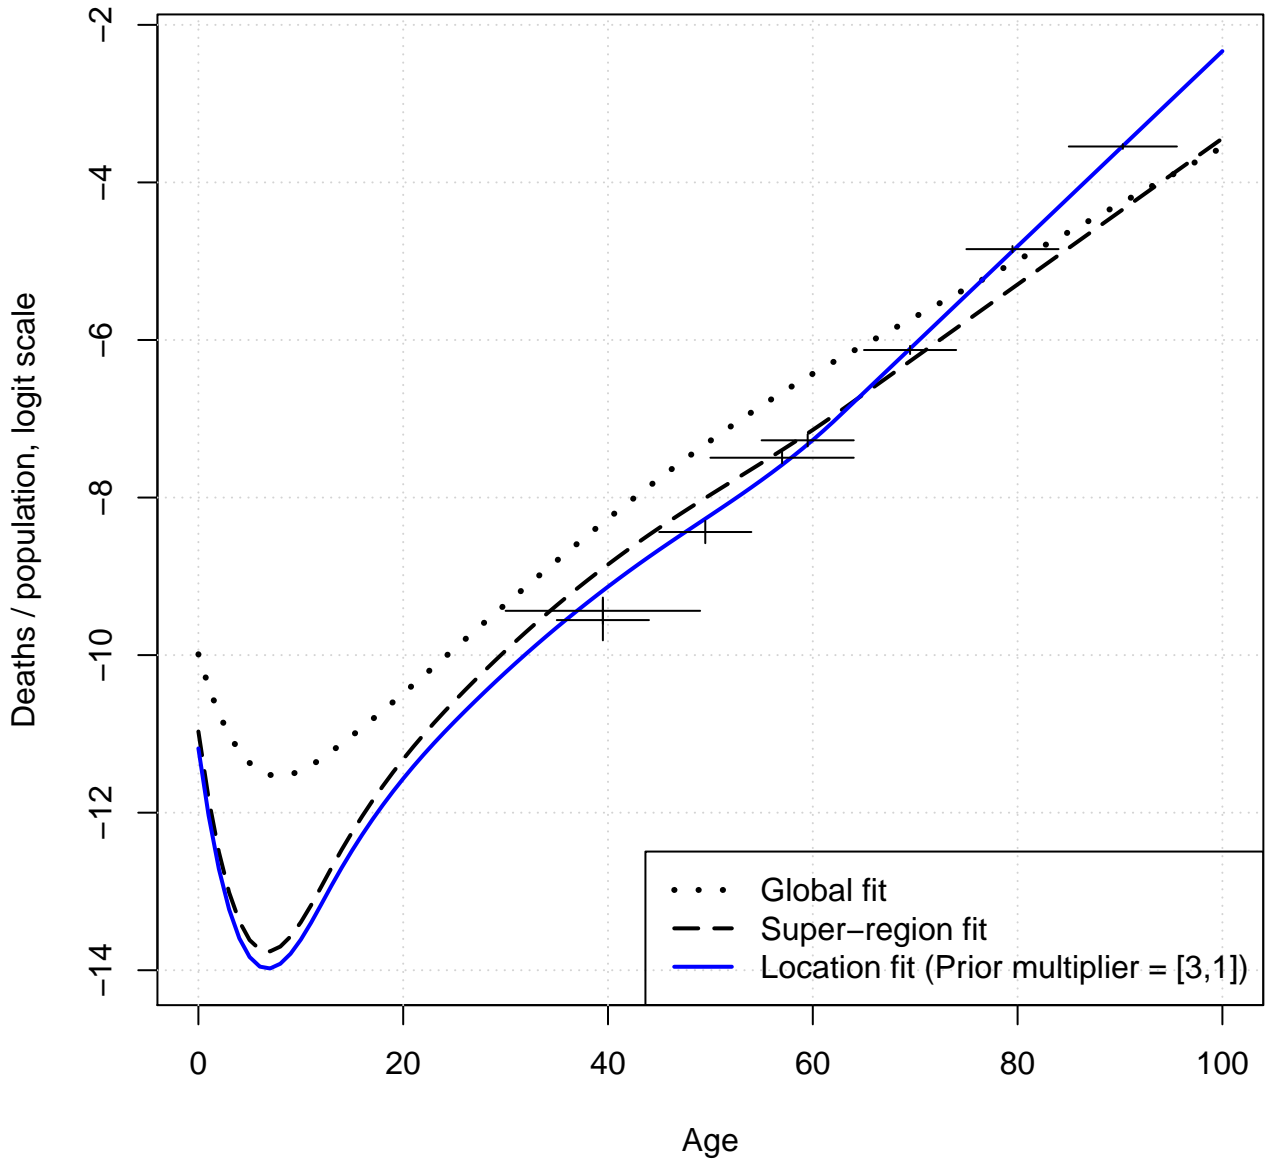



# Michigan

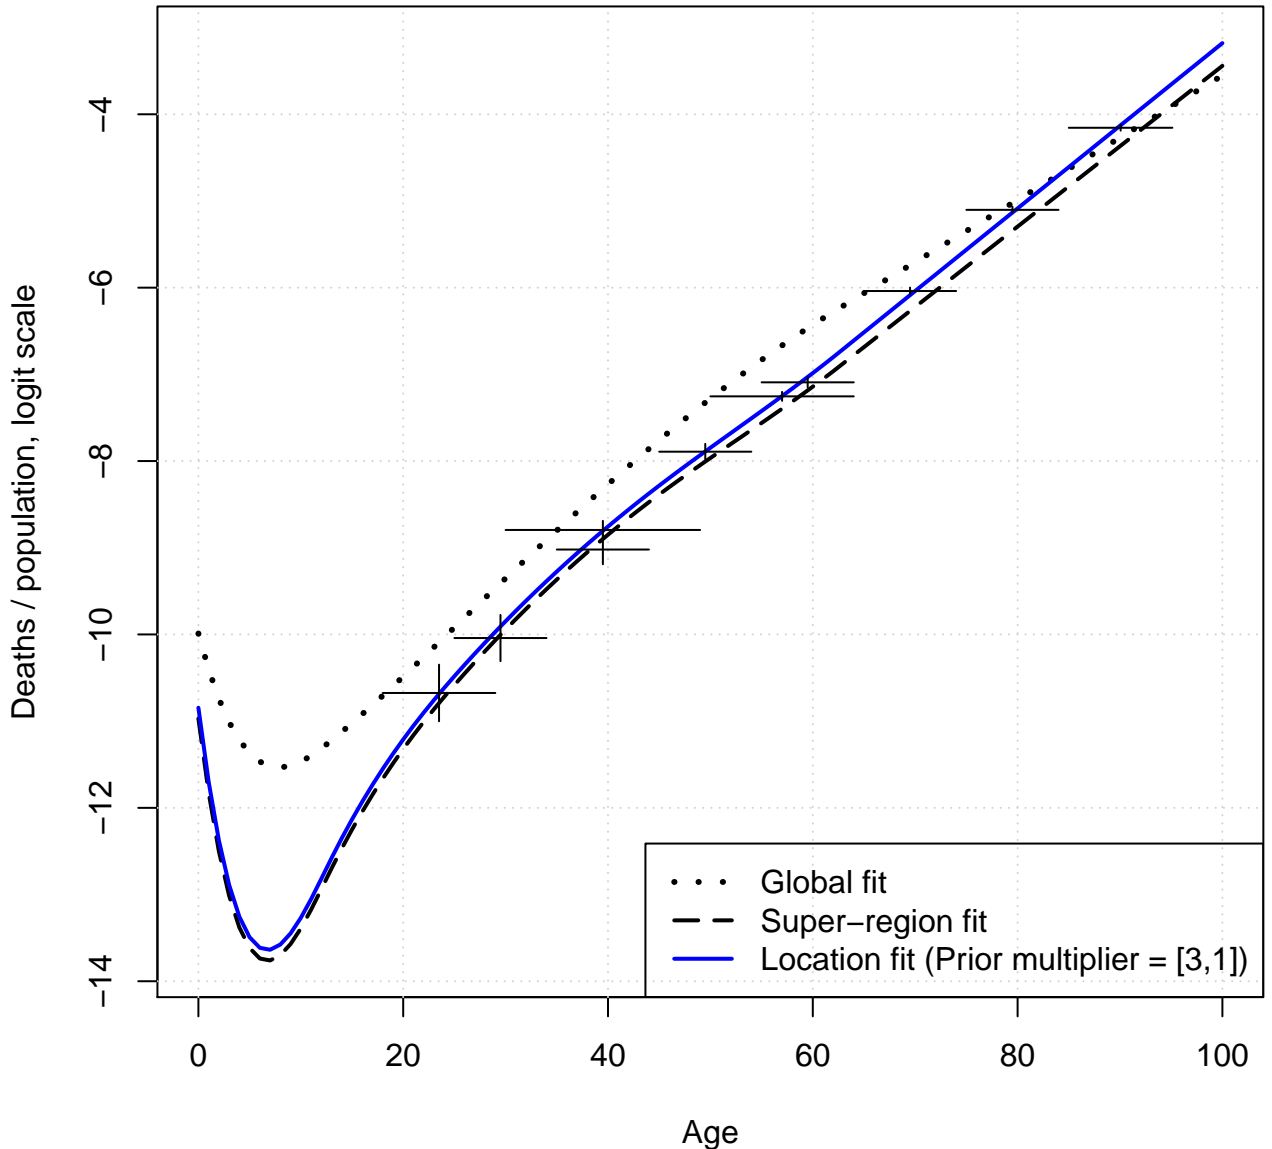

# Minnesota

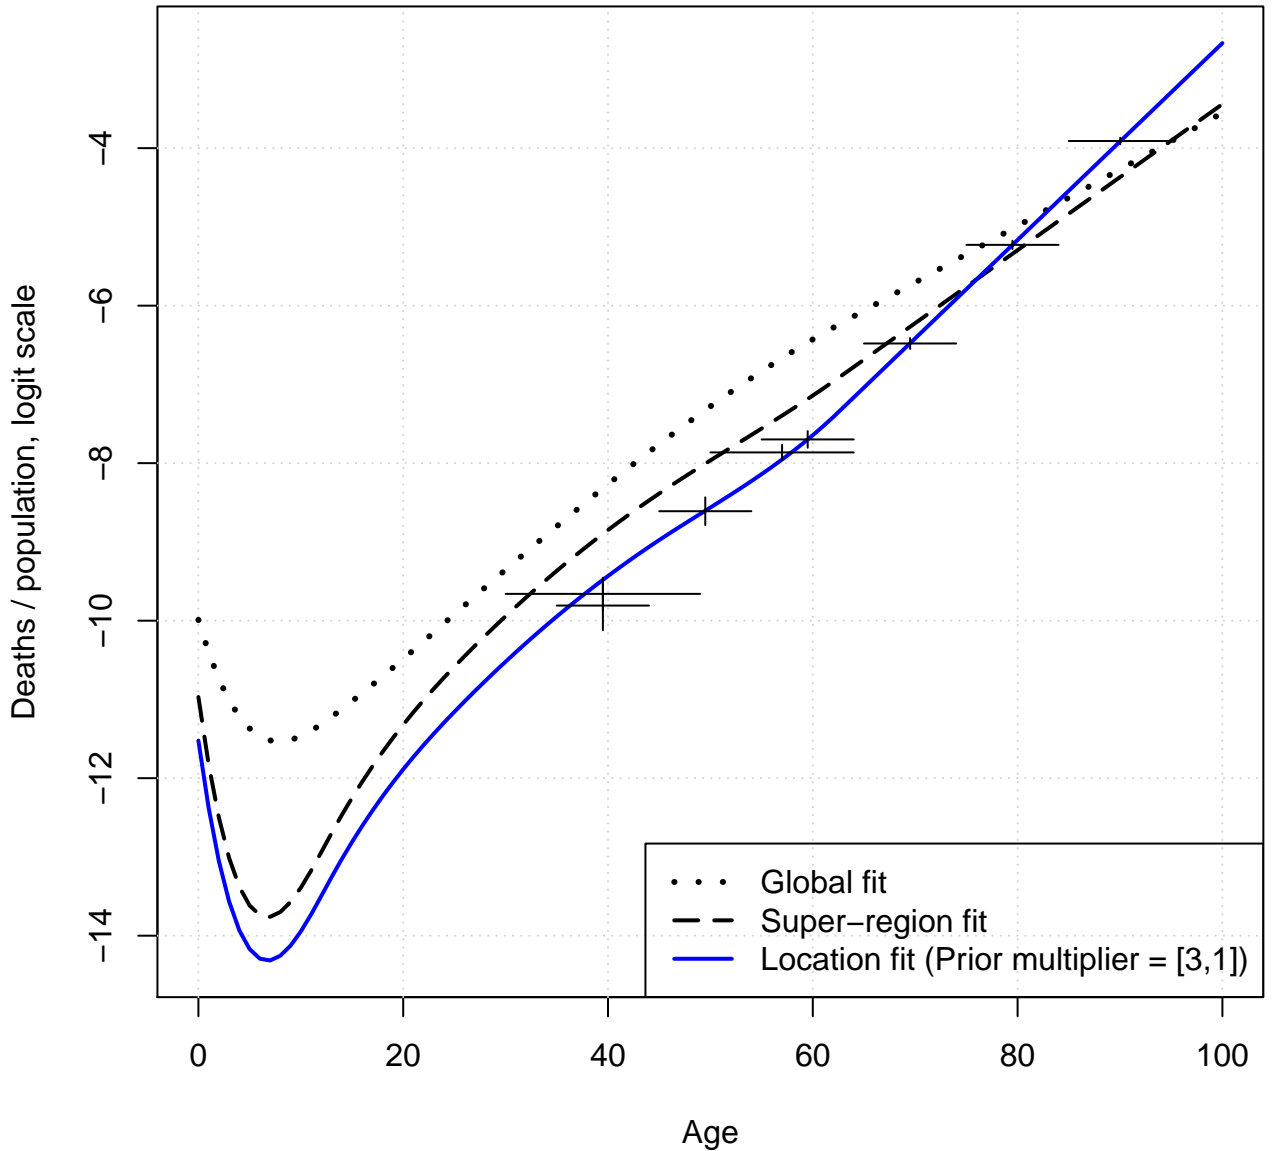

# Mississippi

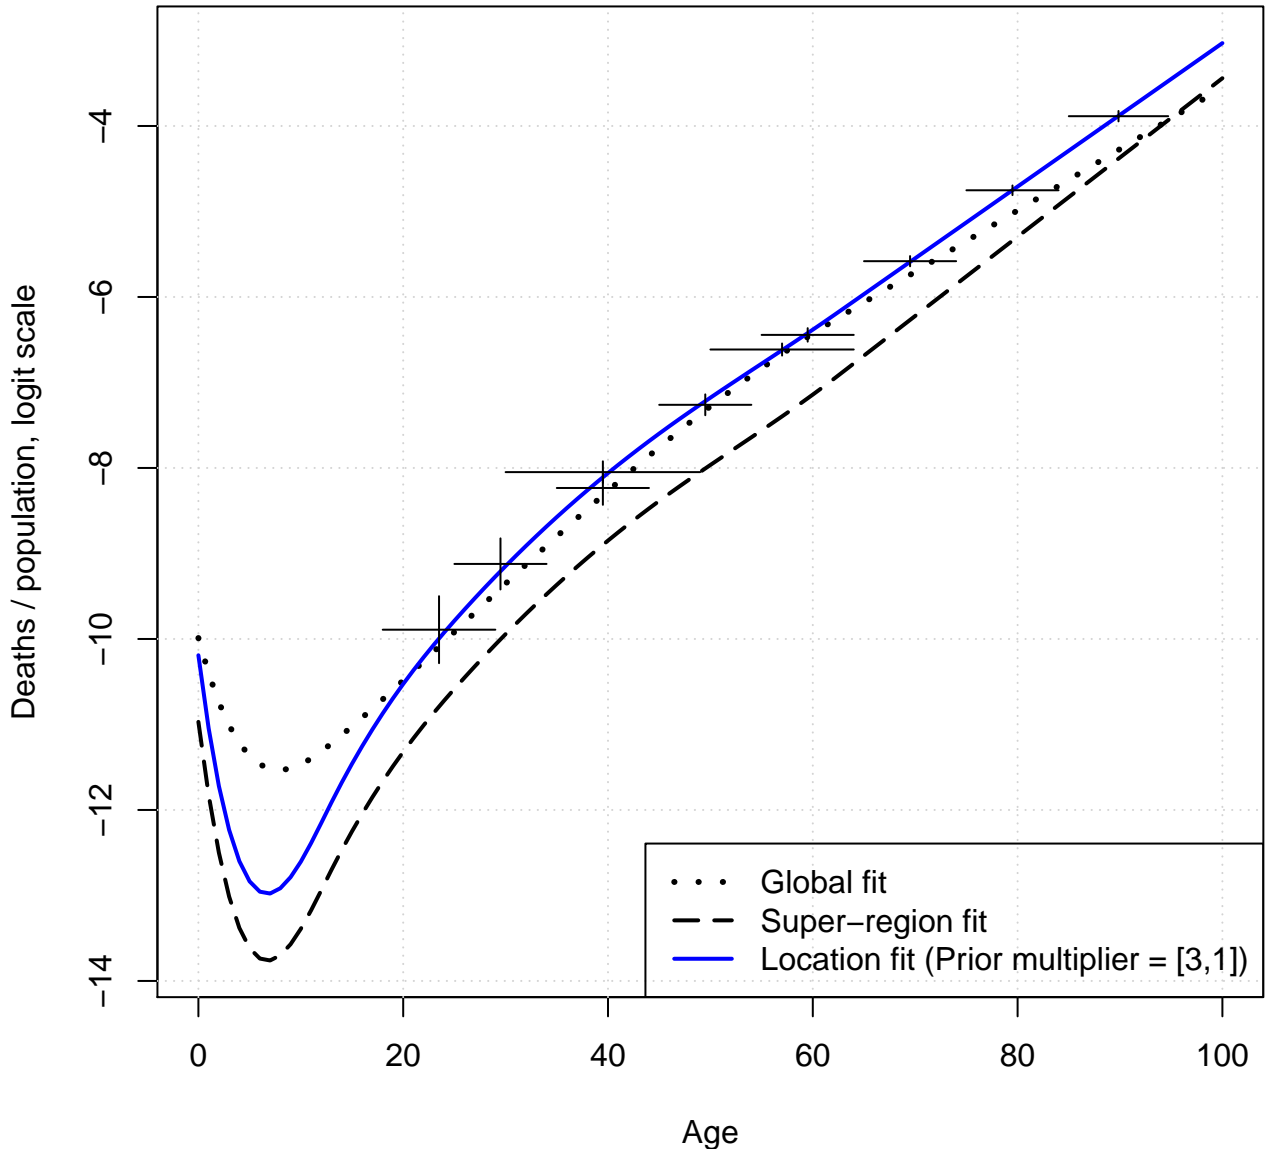

# Missouri

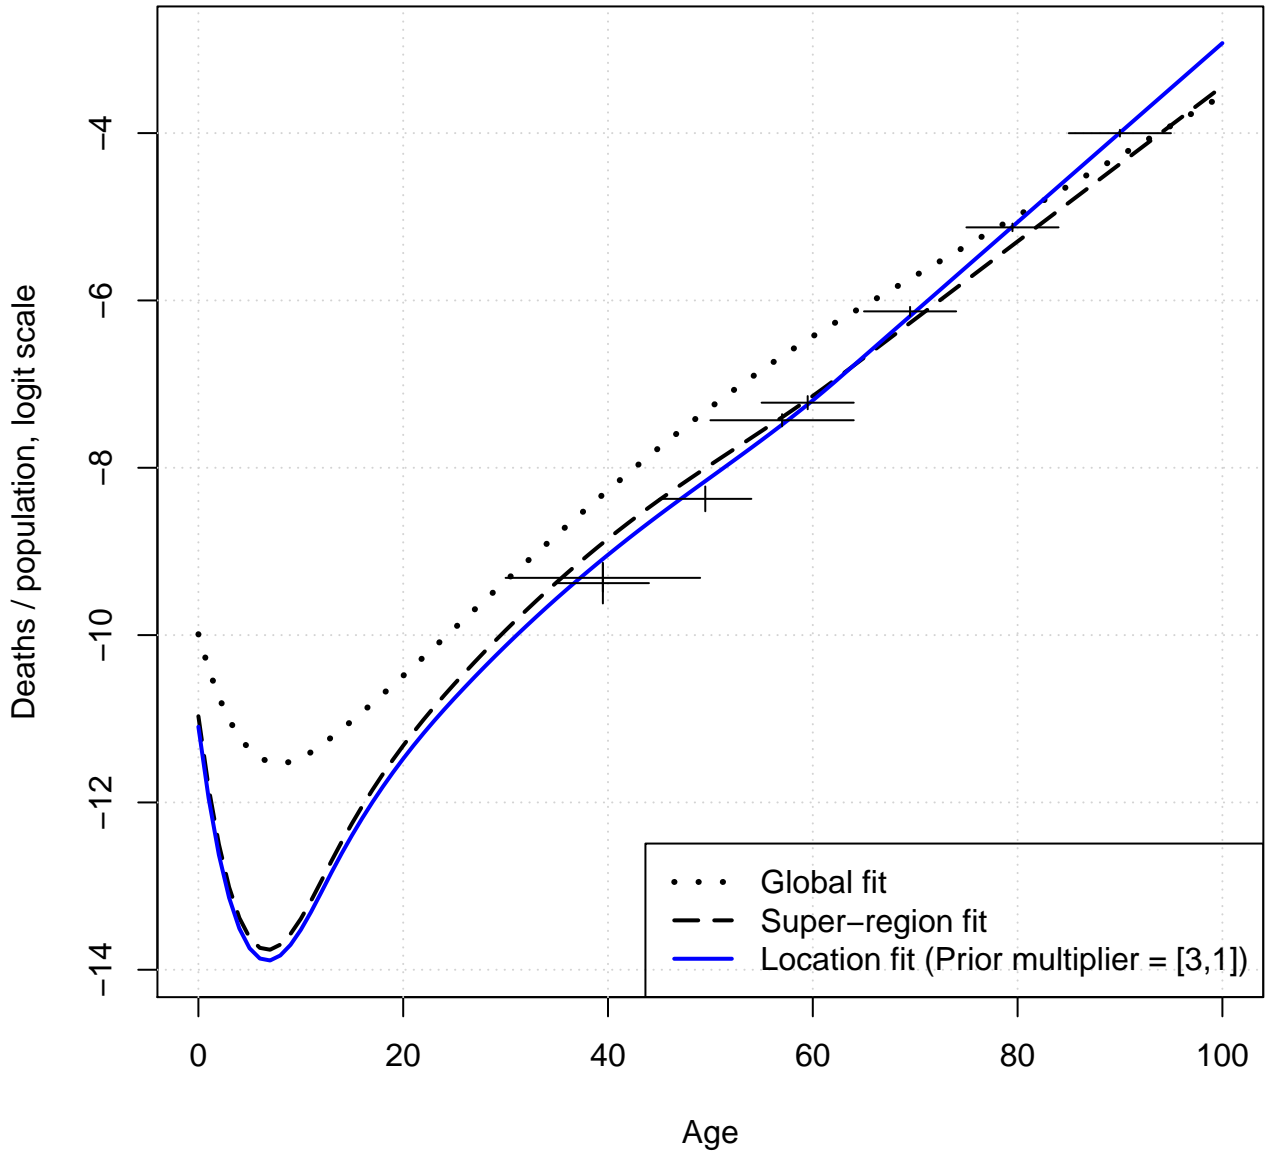

# Montana

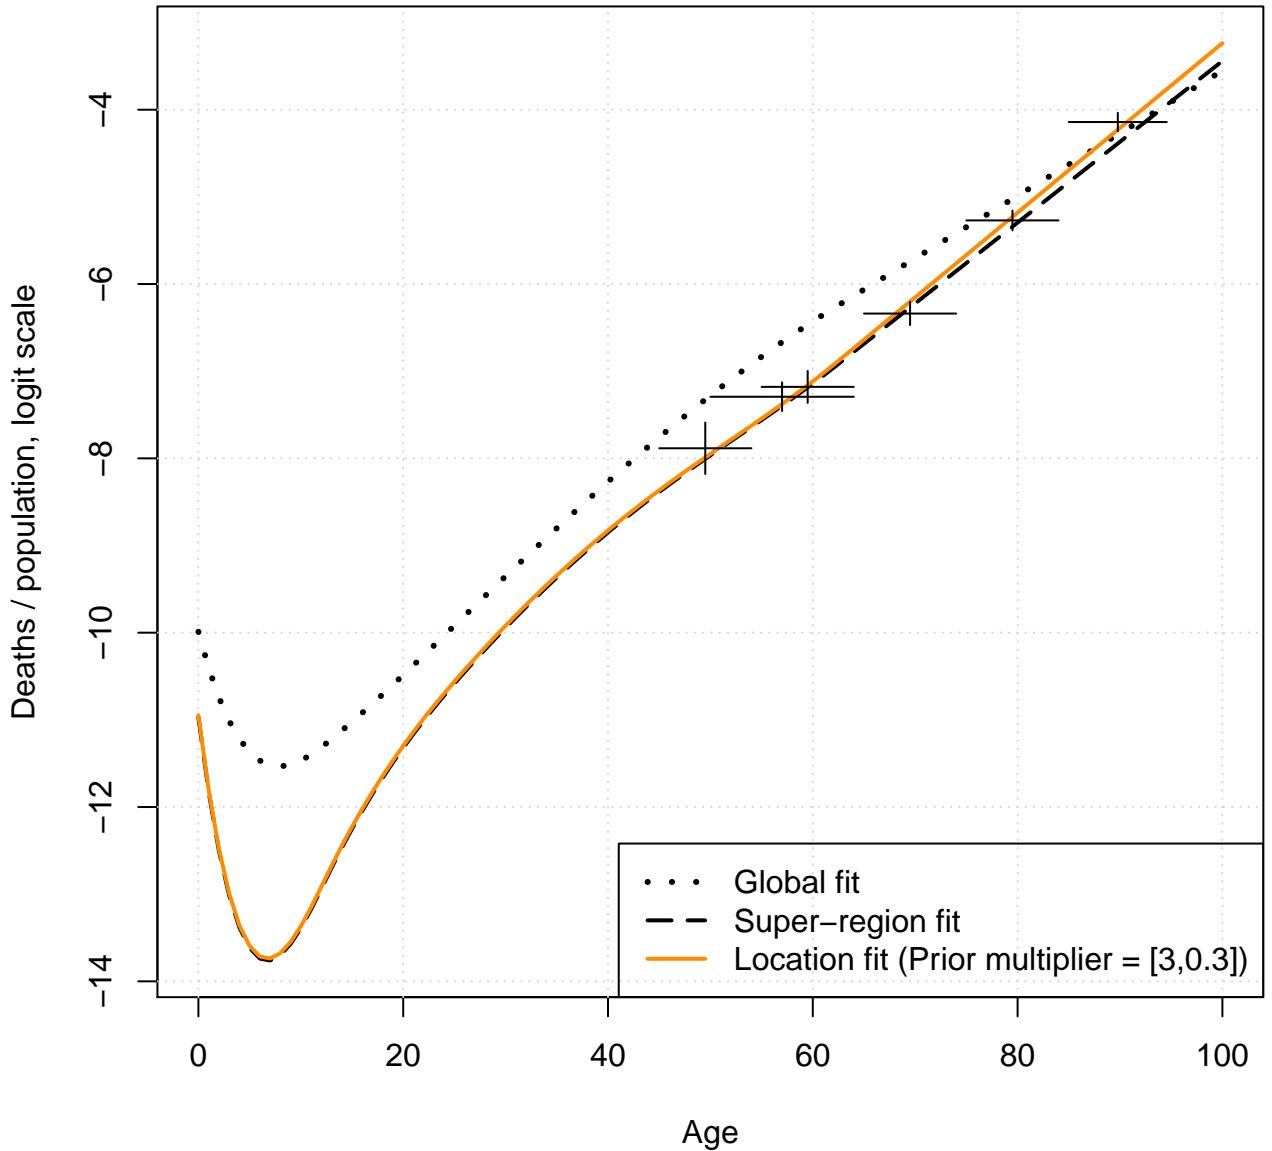

# Nebraska

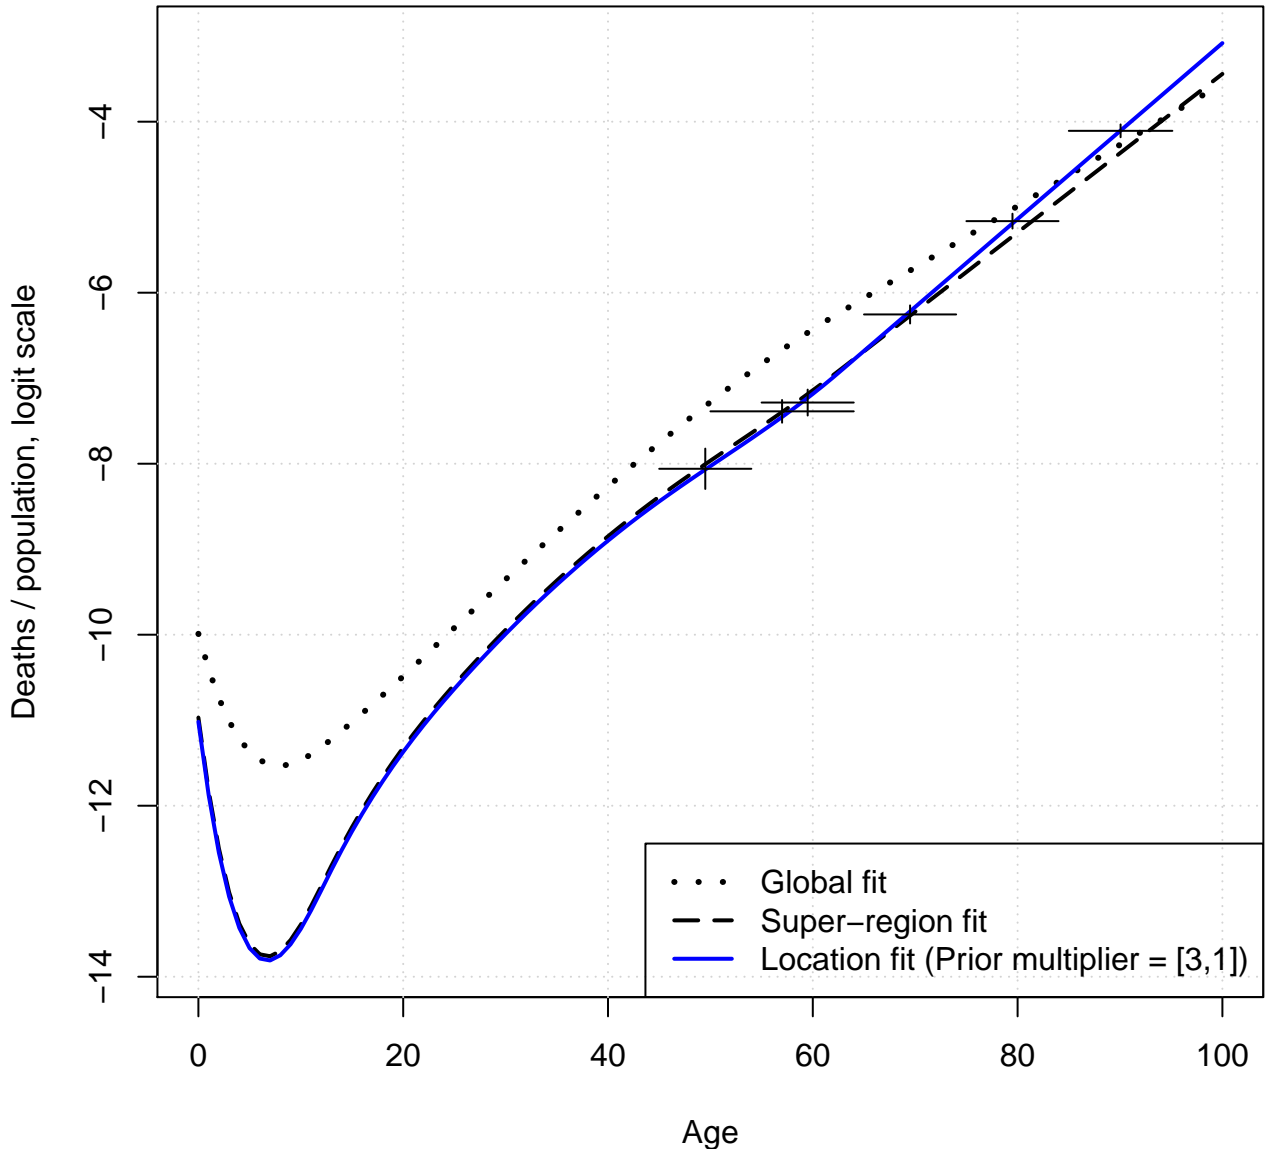

# Nevada

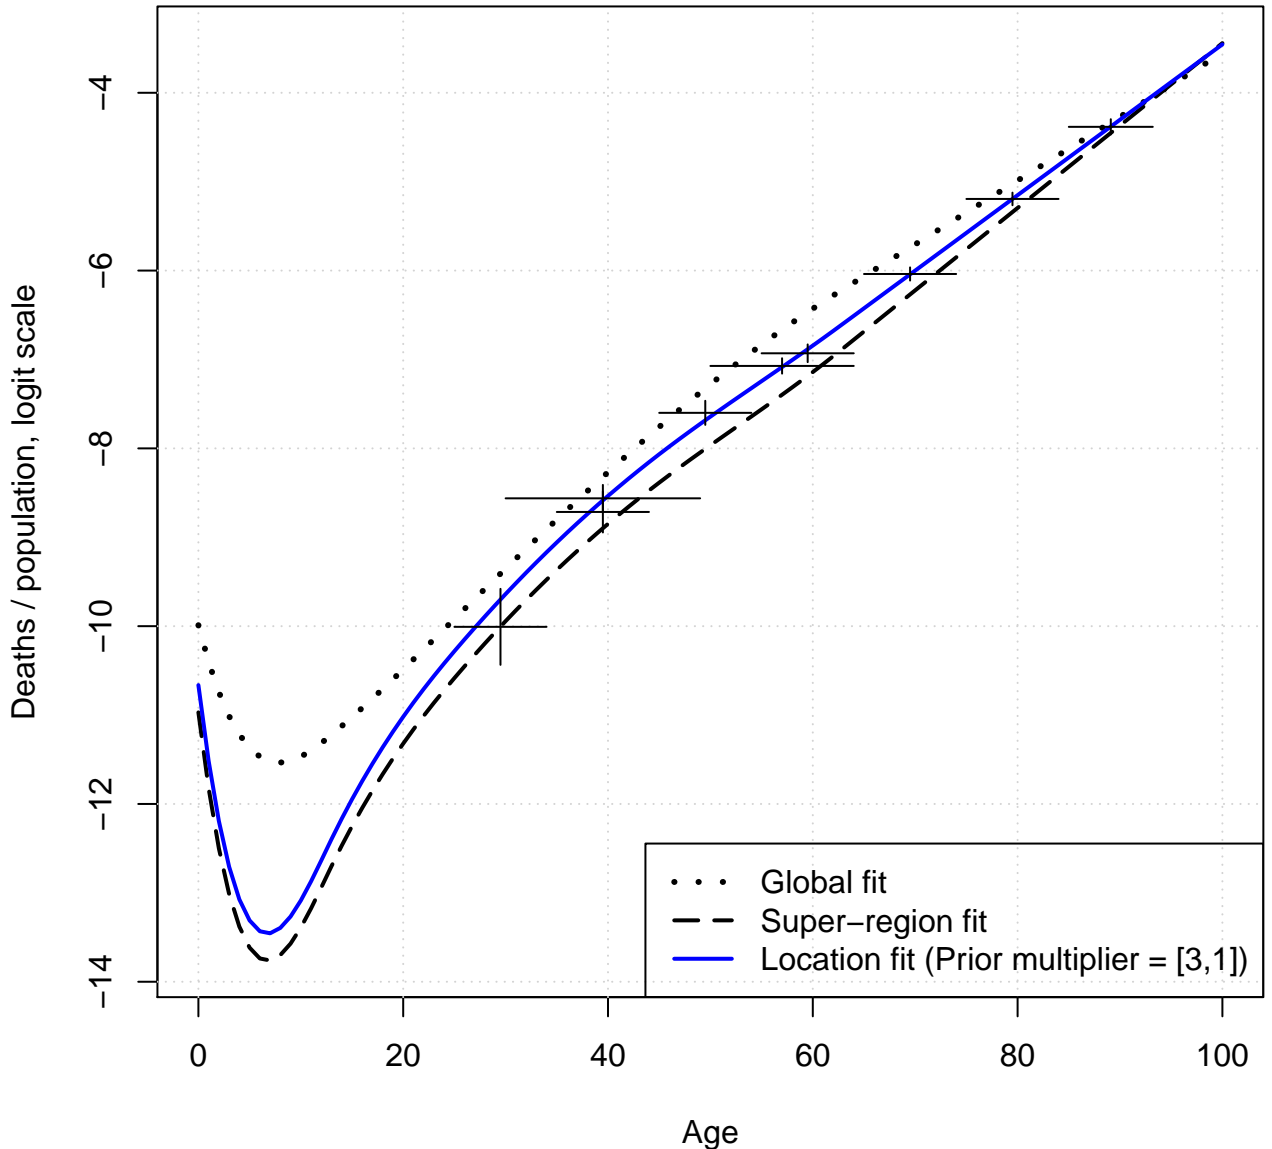

# New Hampshire

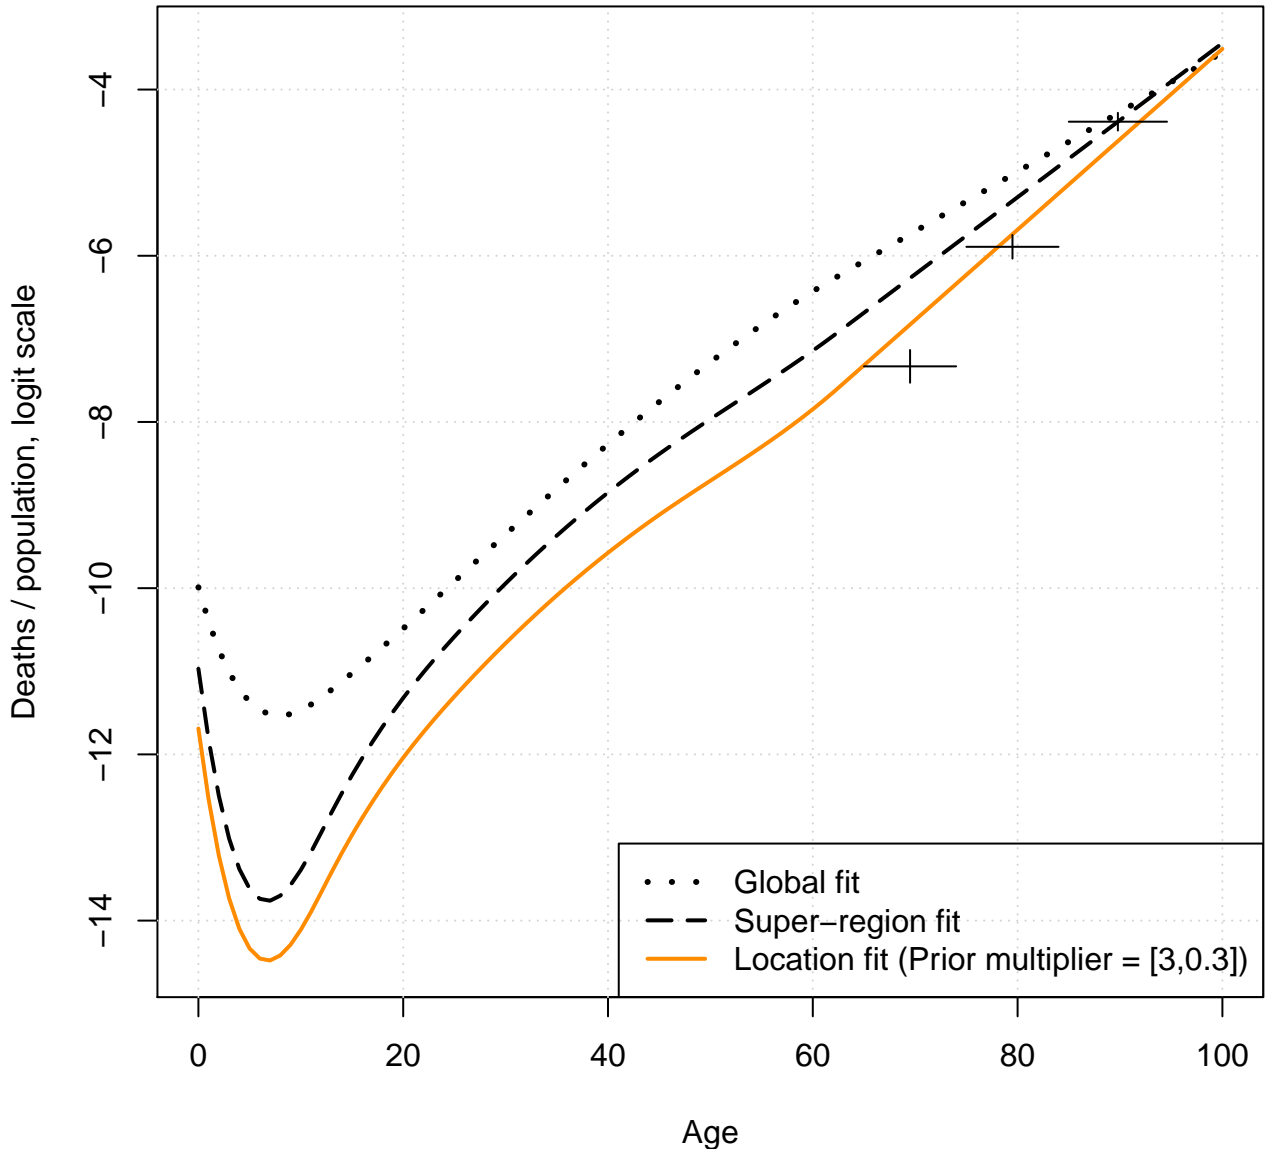



# New Jersey

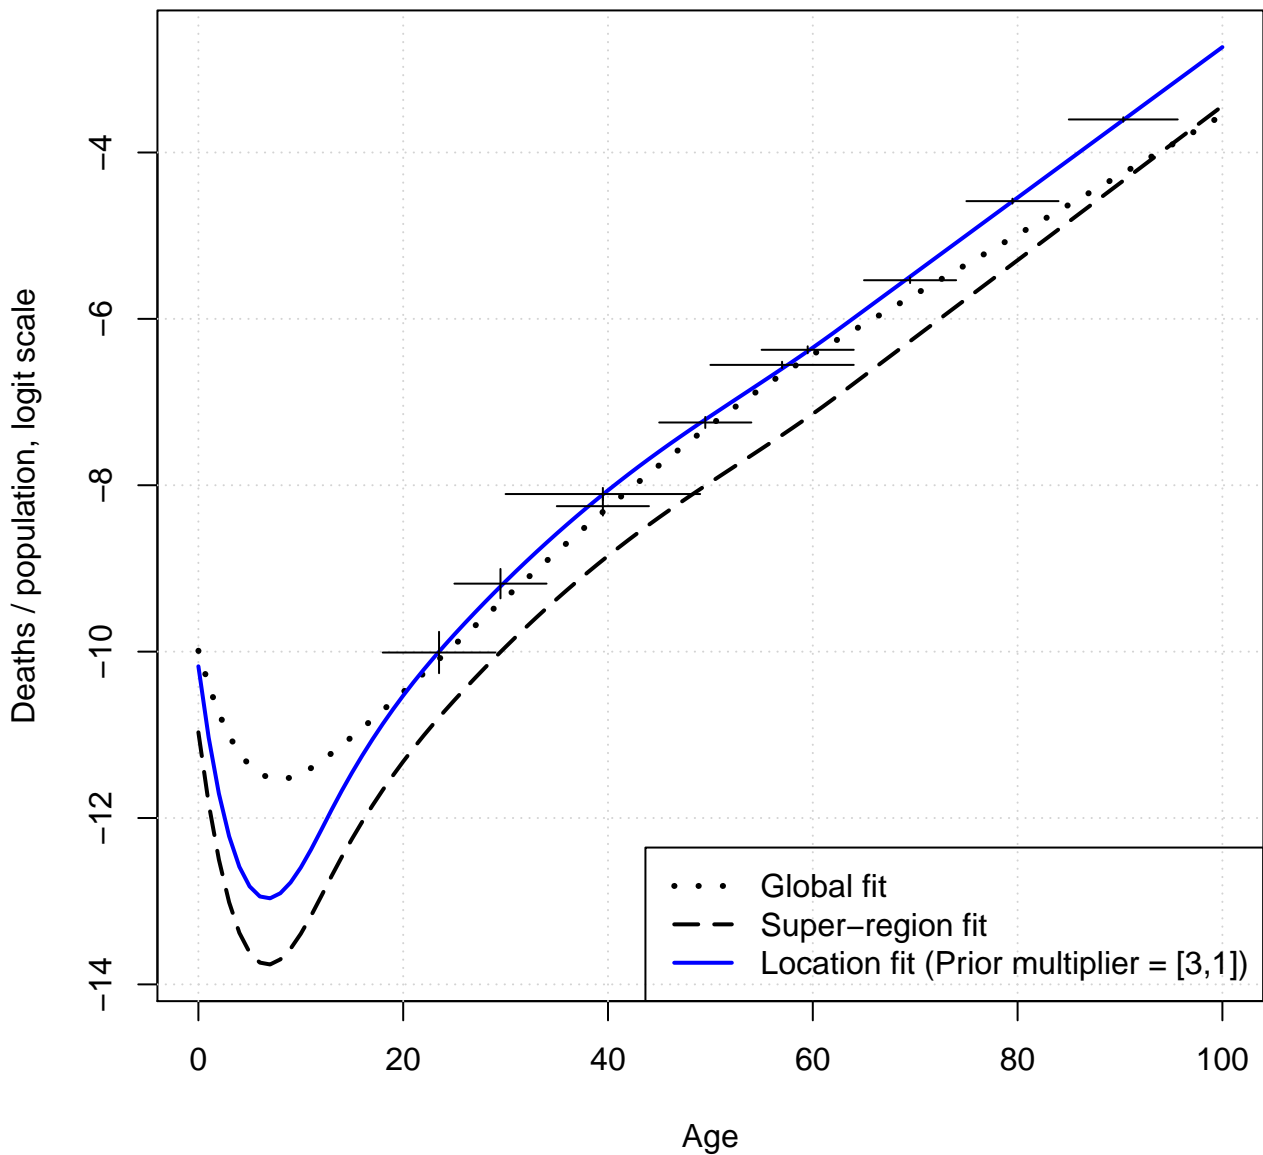

# New Mexico

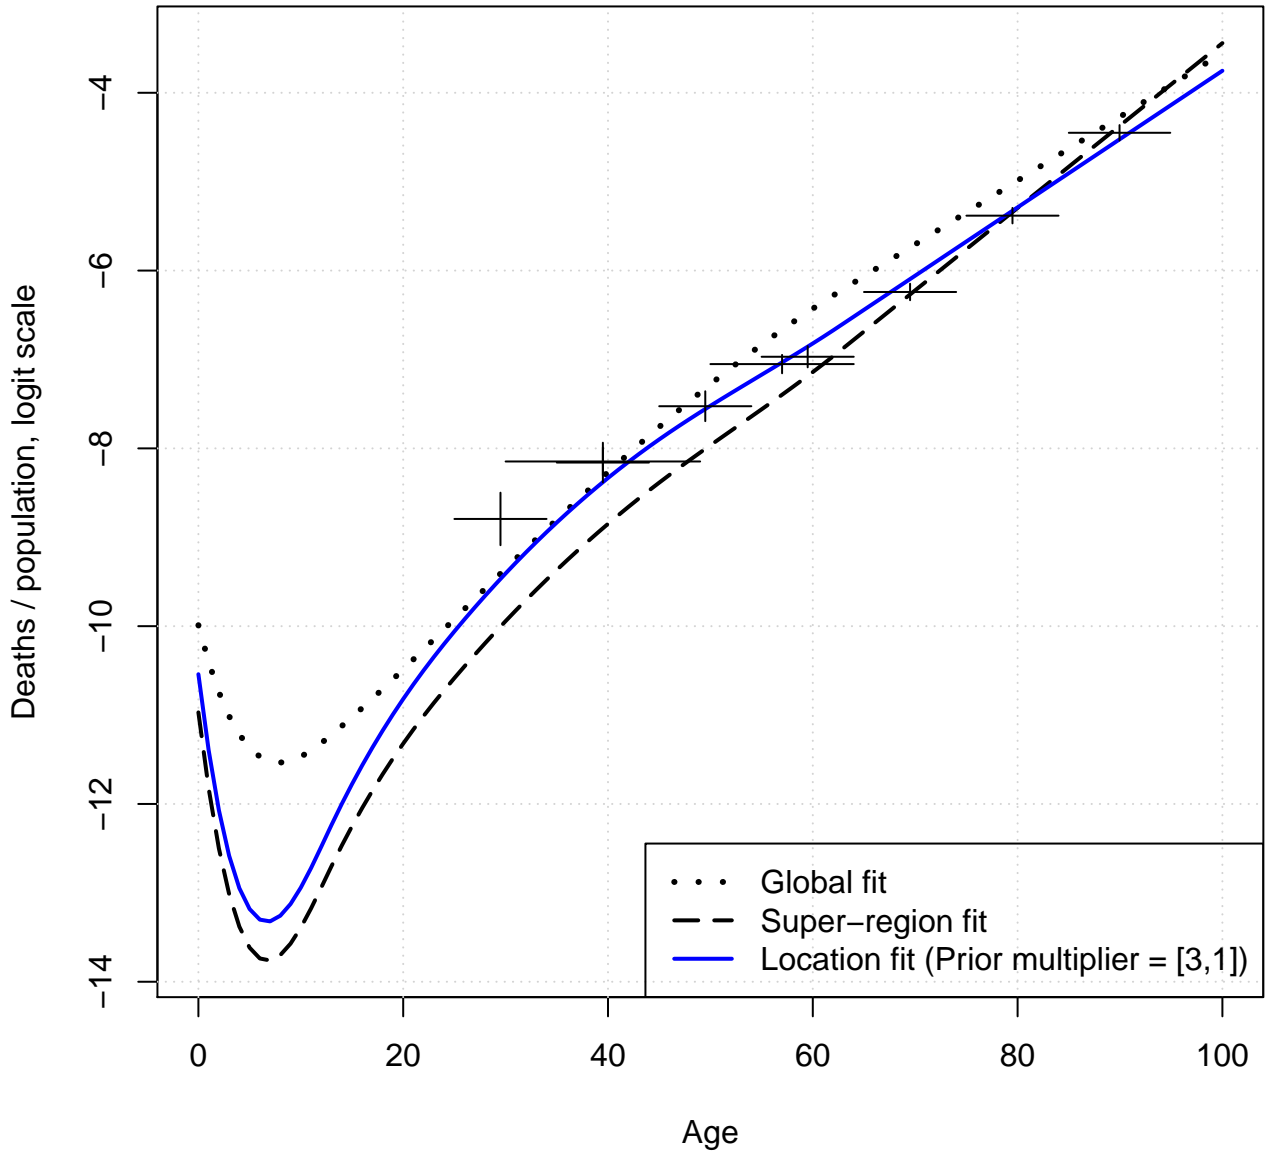

# New York

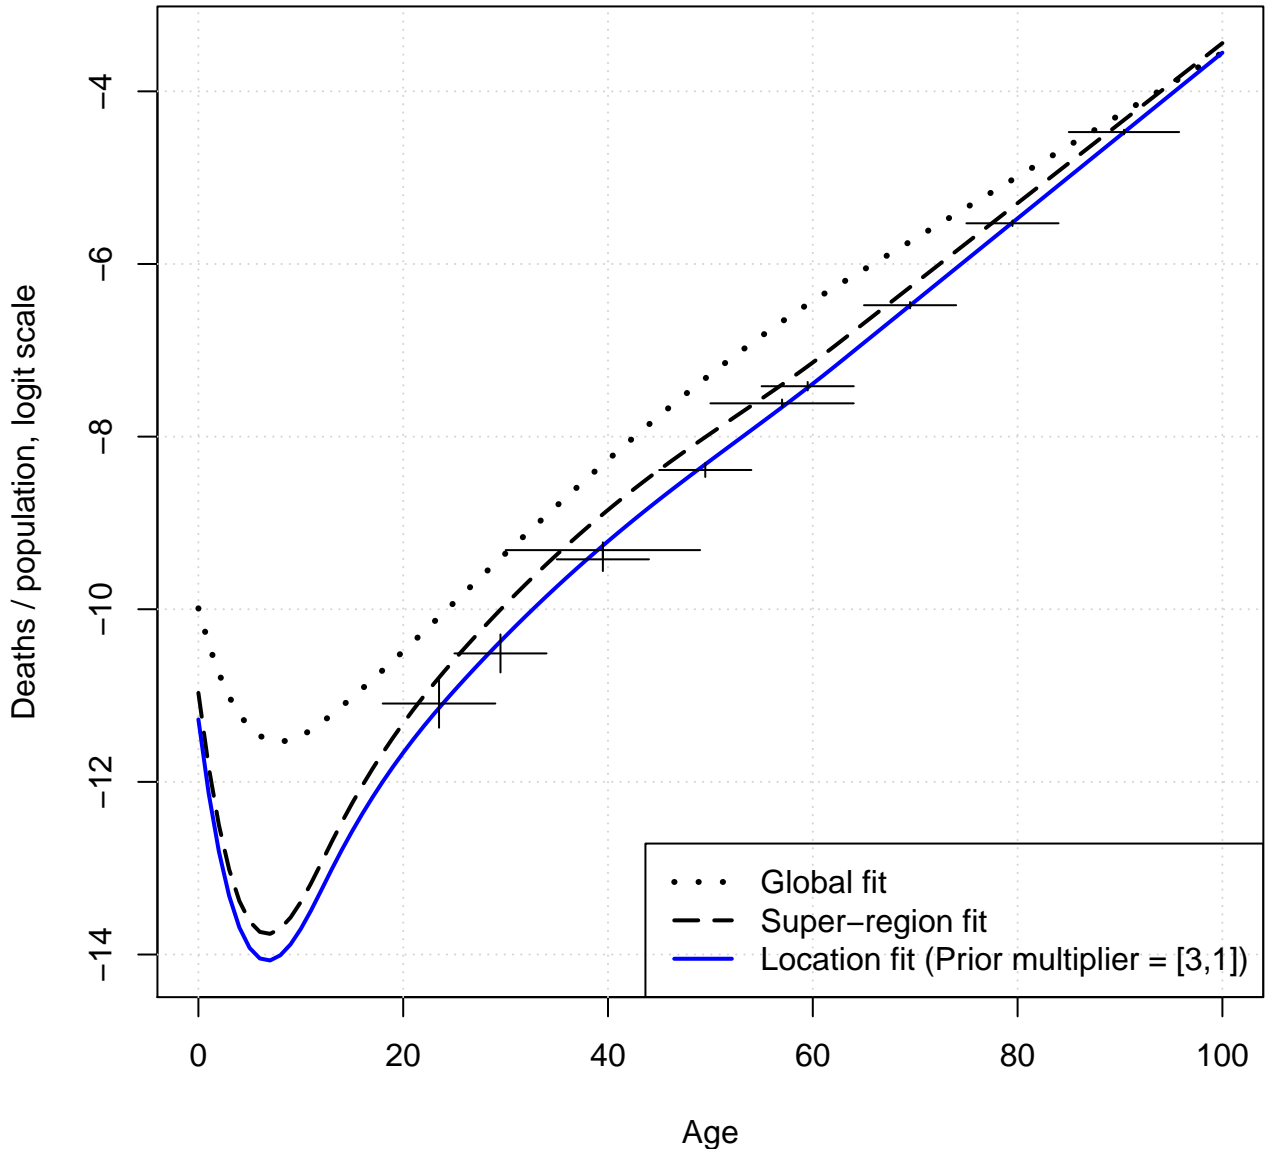

# North Carolina

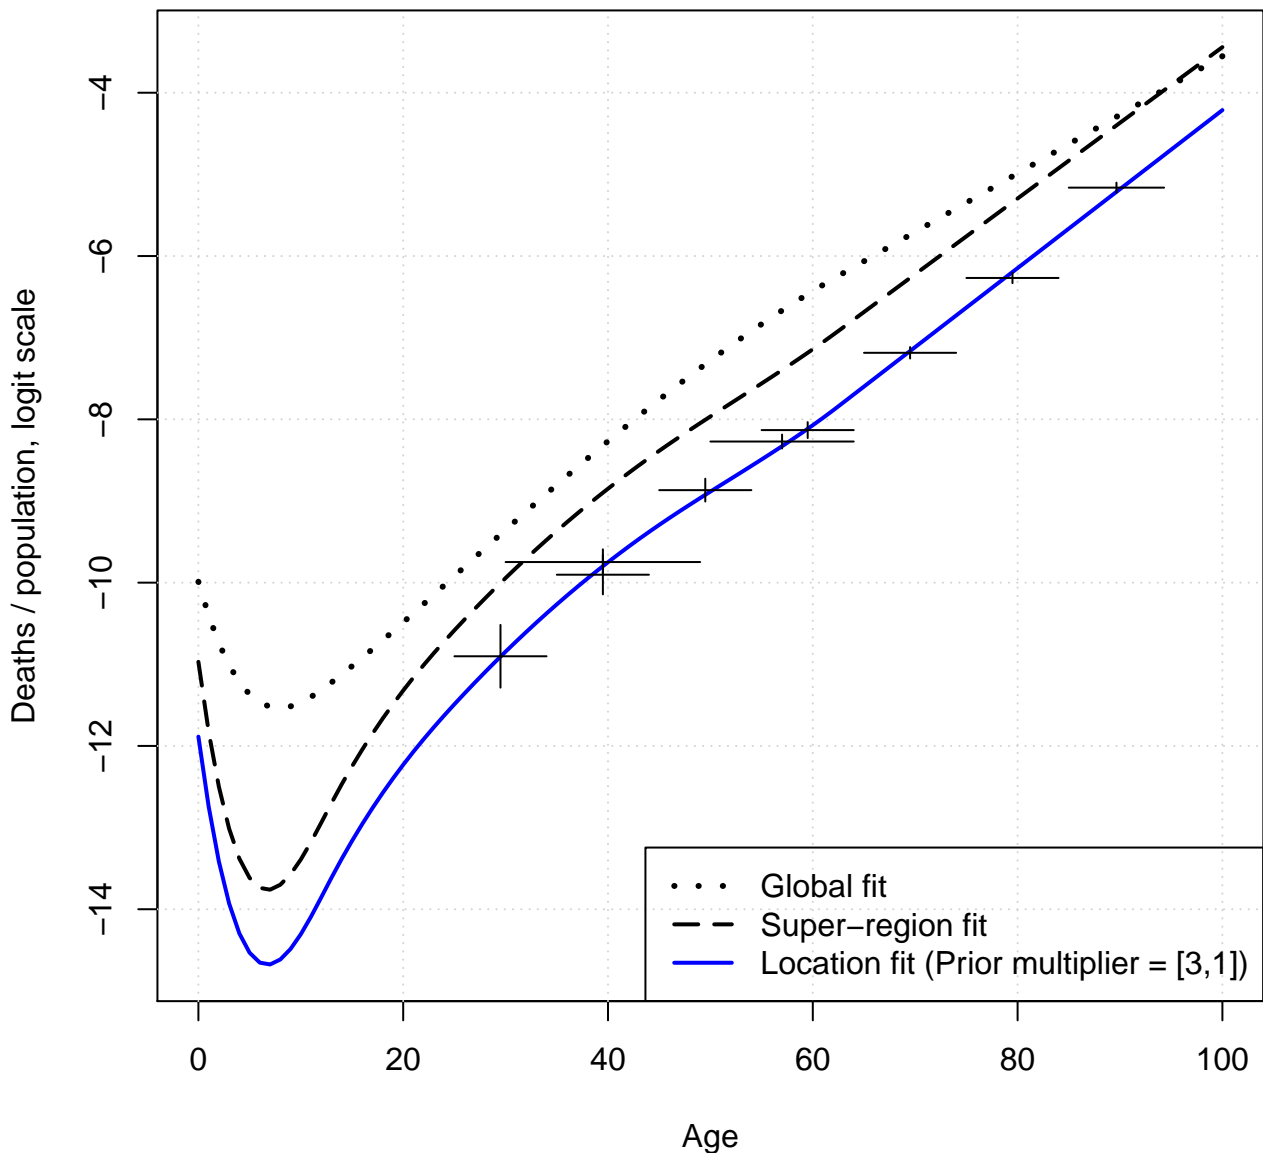

# North Dakota

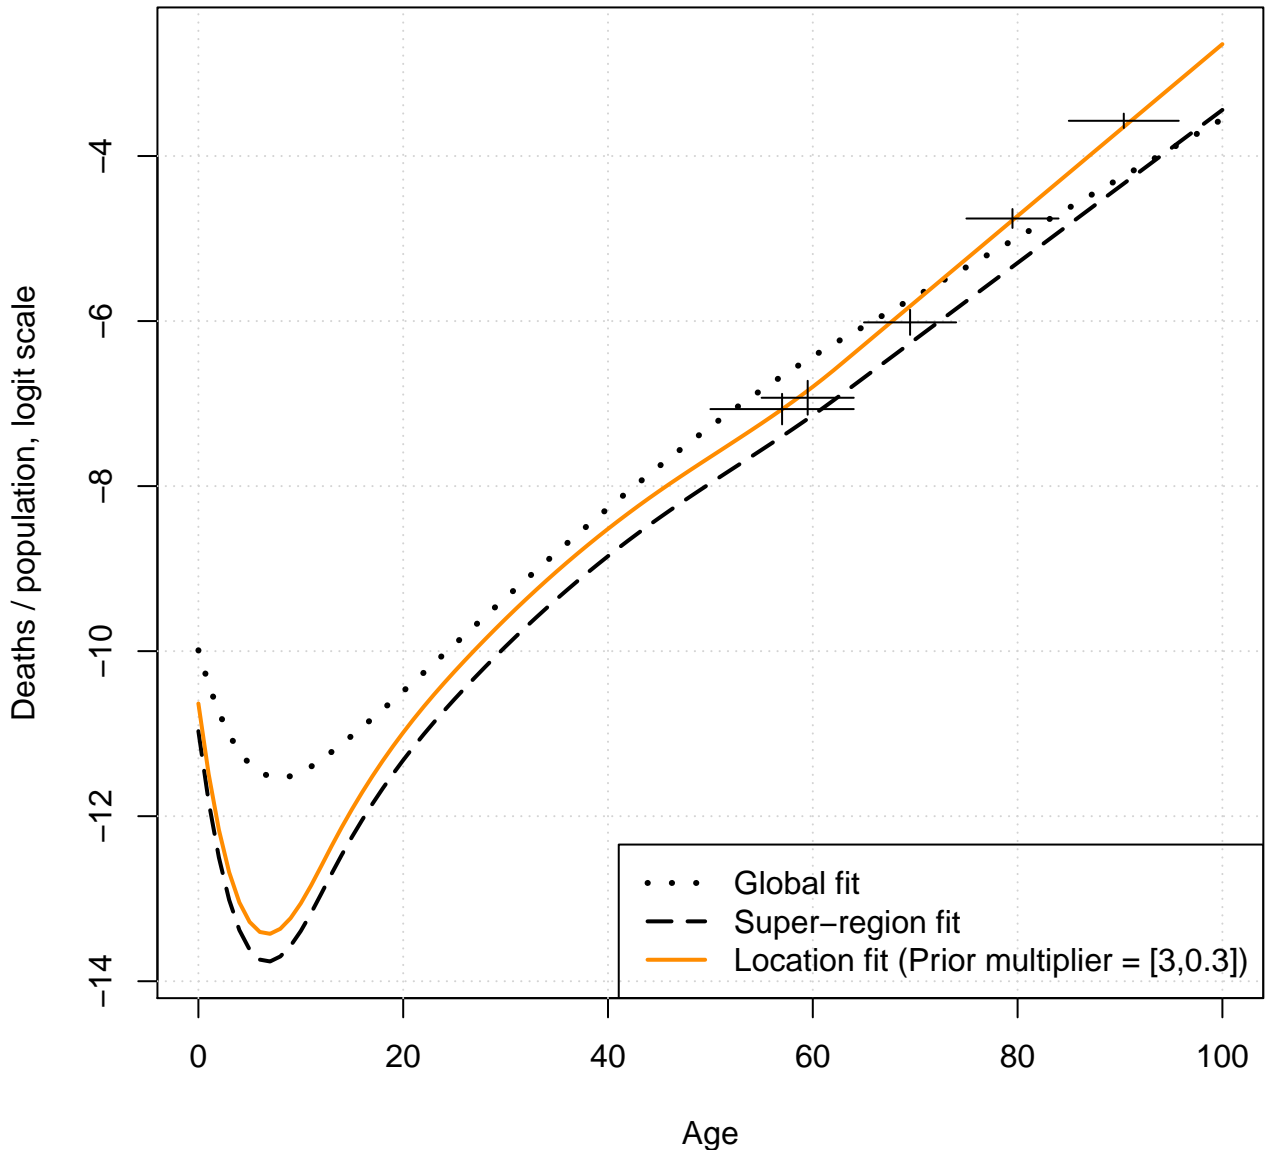

# Ohio

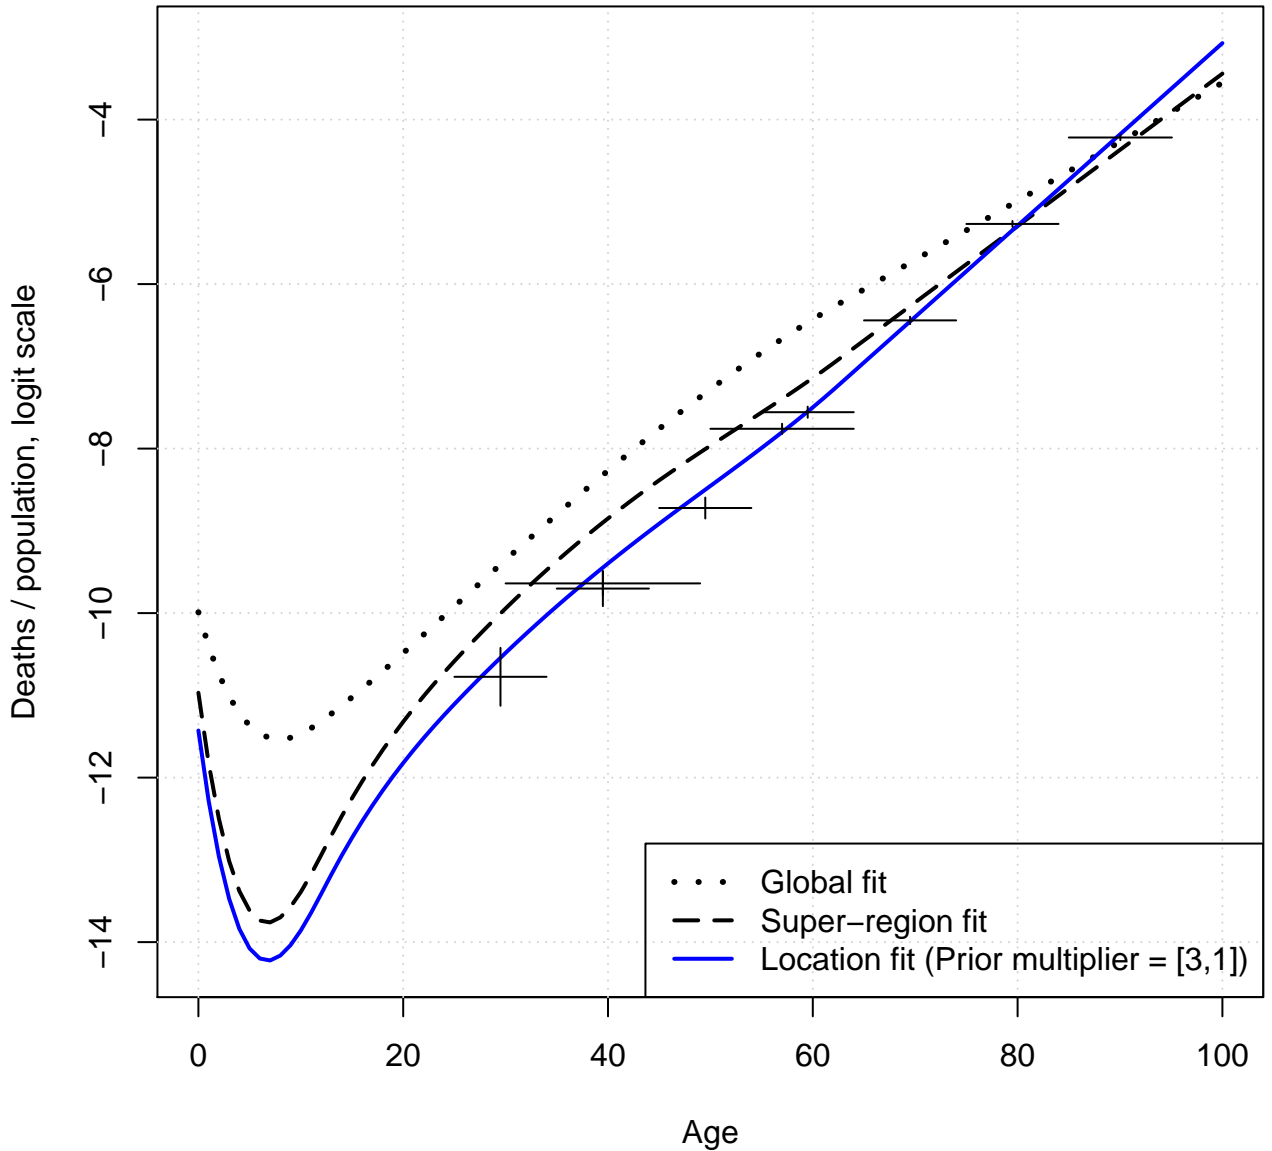

# Oklahoma

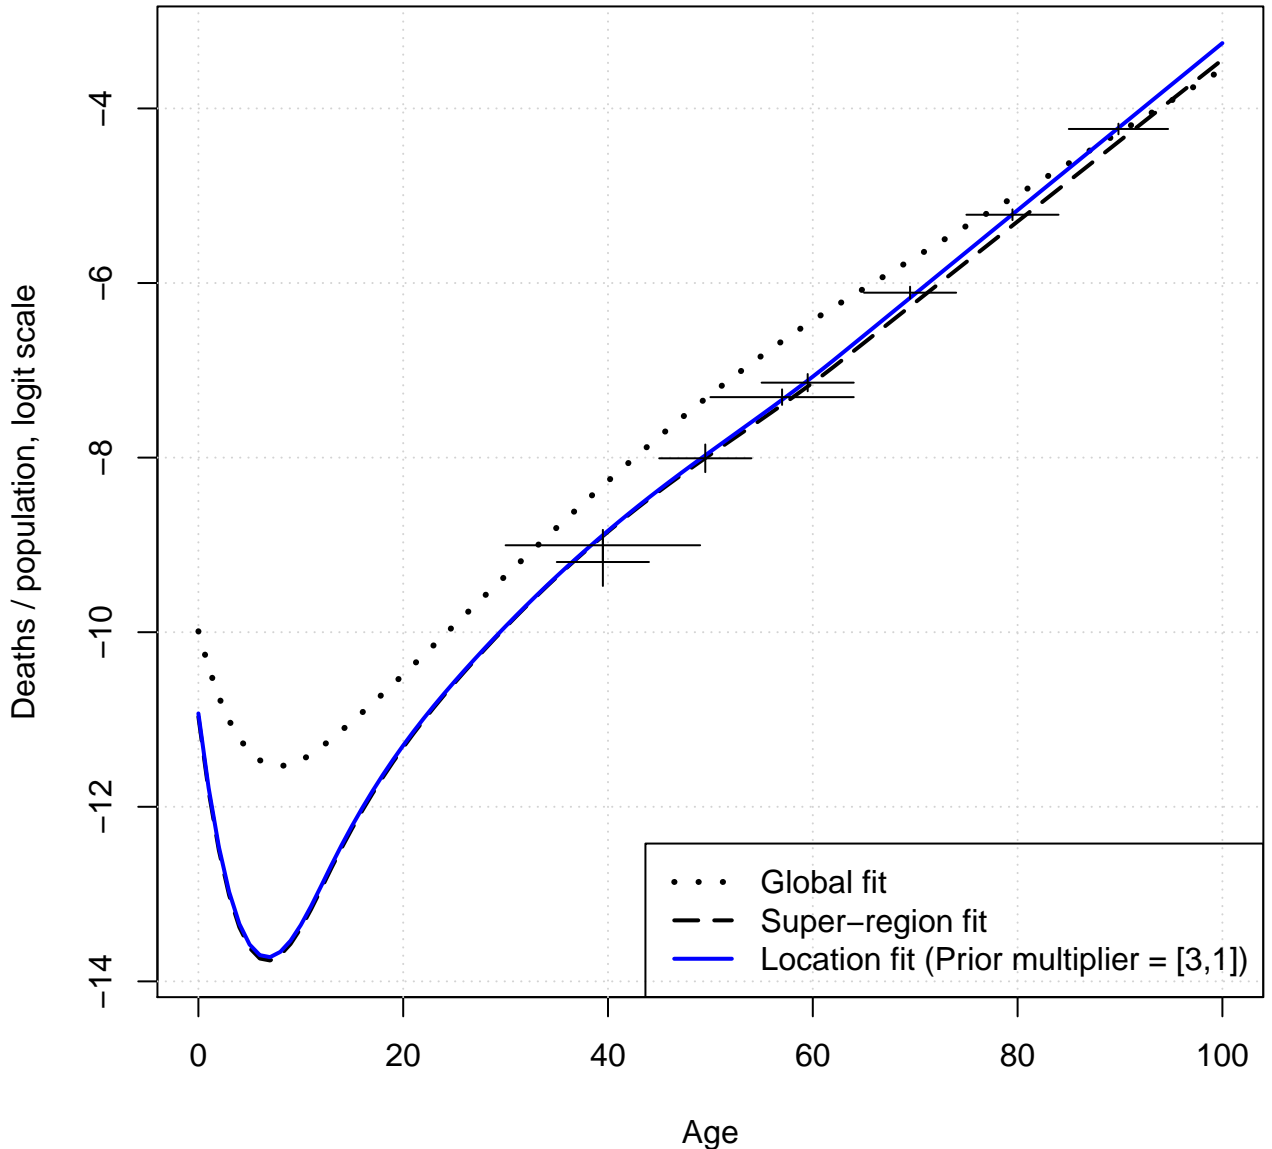

# Oregon

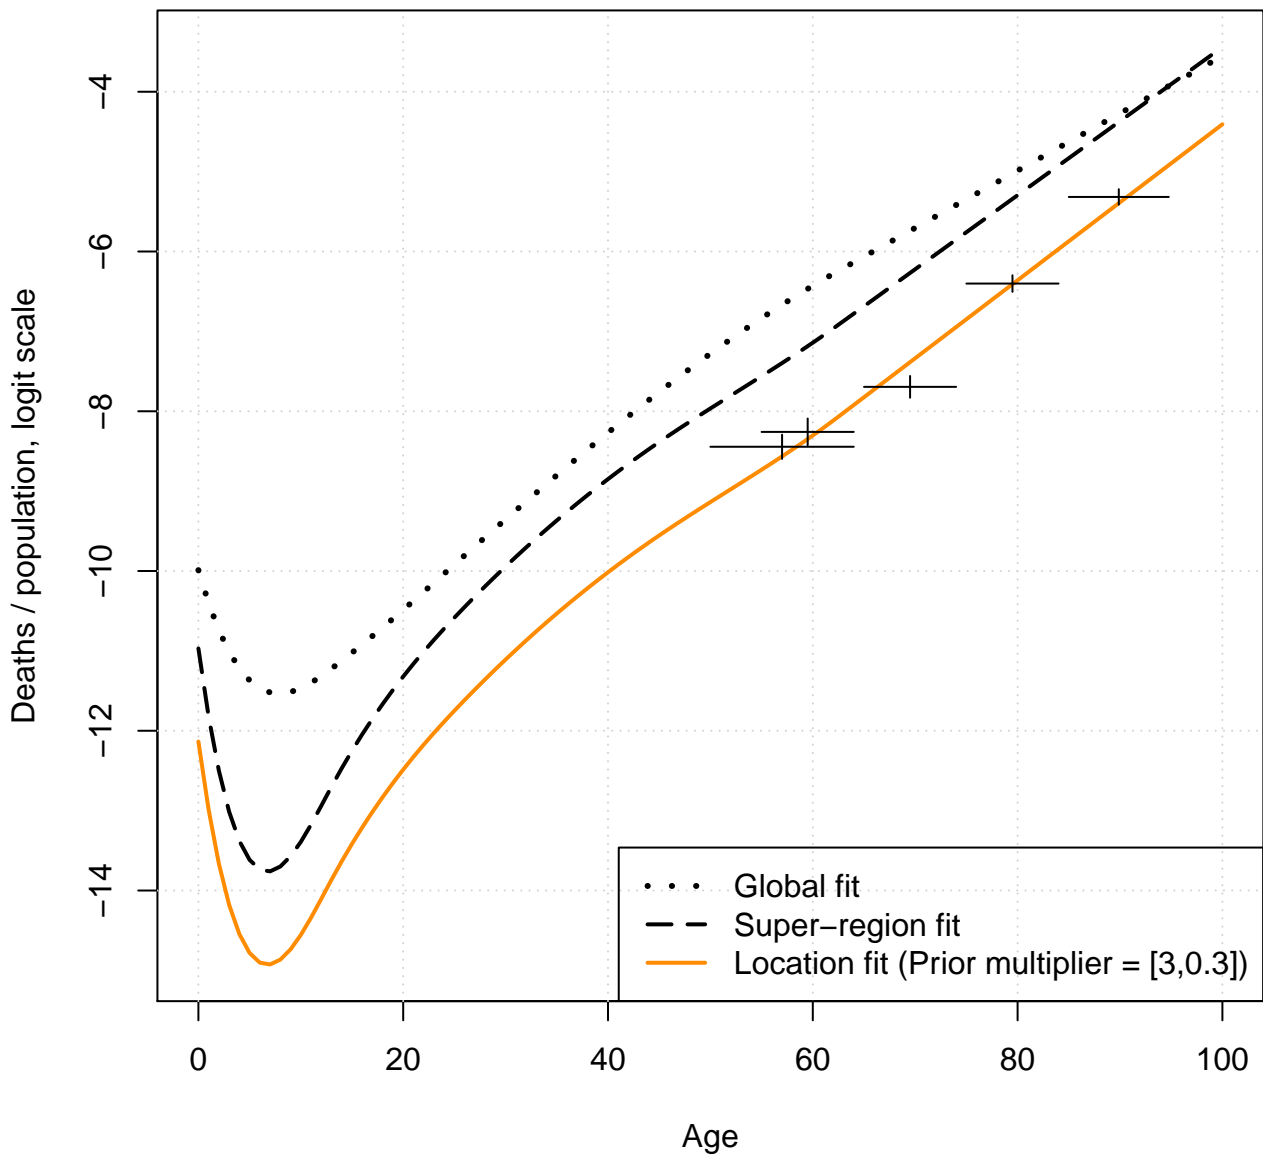



# Pennsylvania

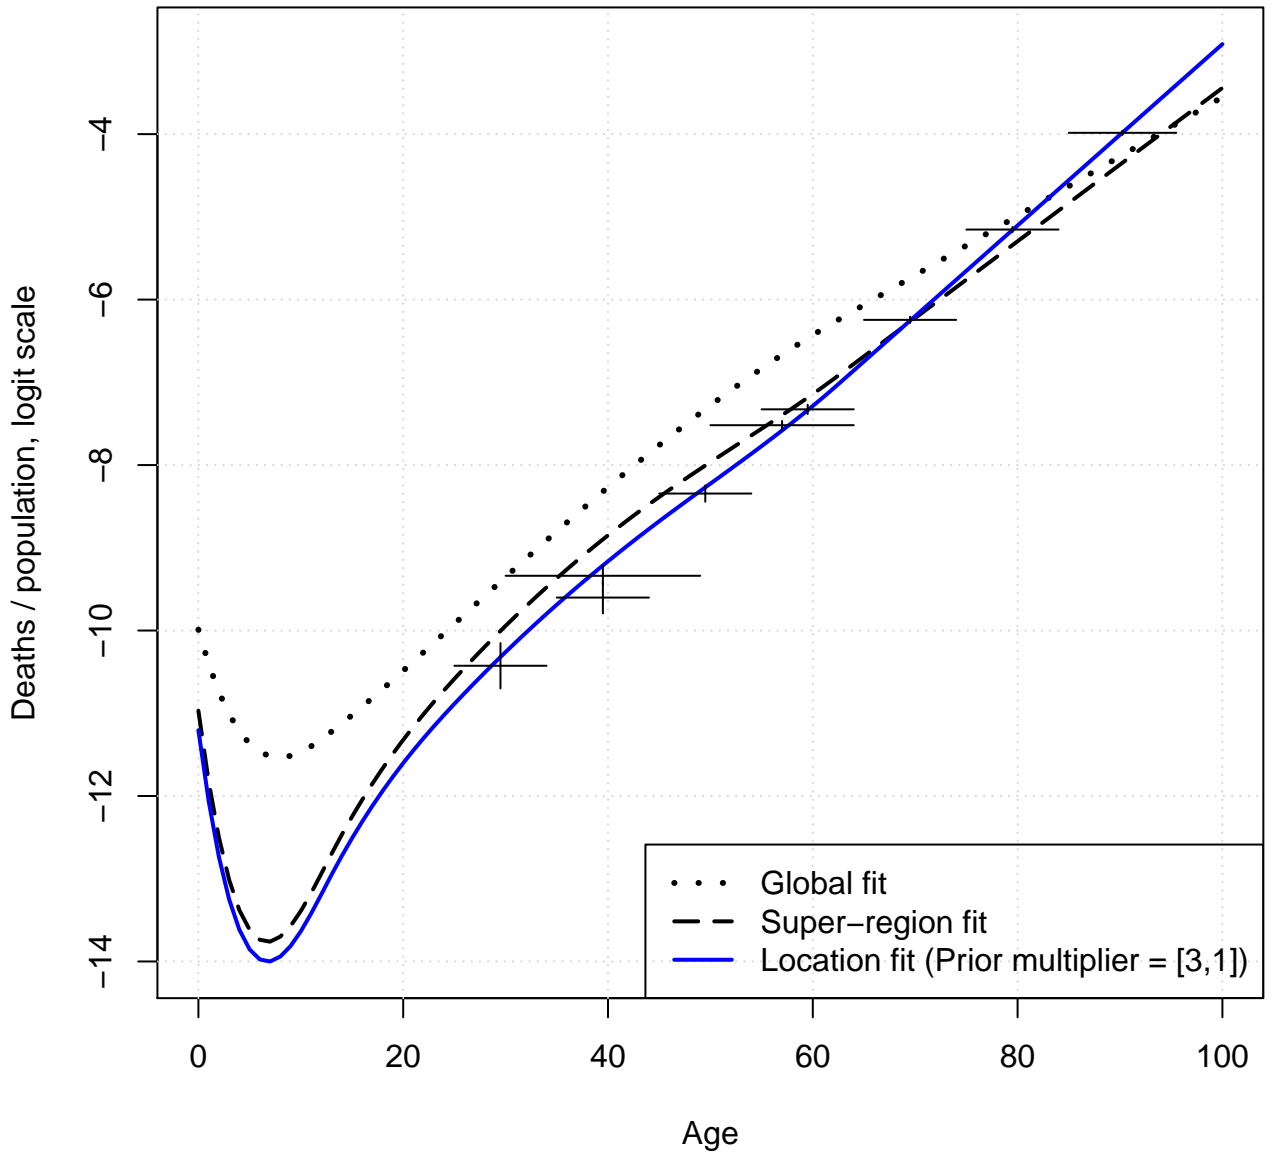

# Rhode Island

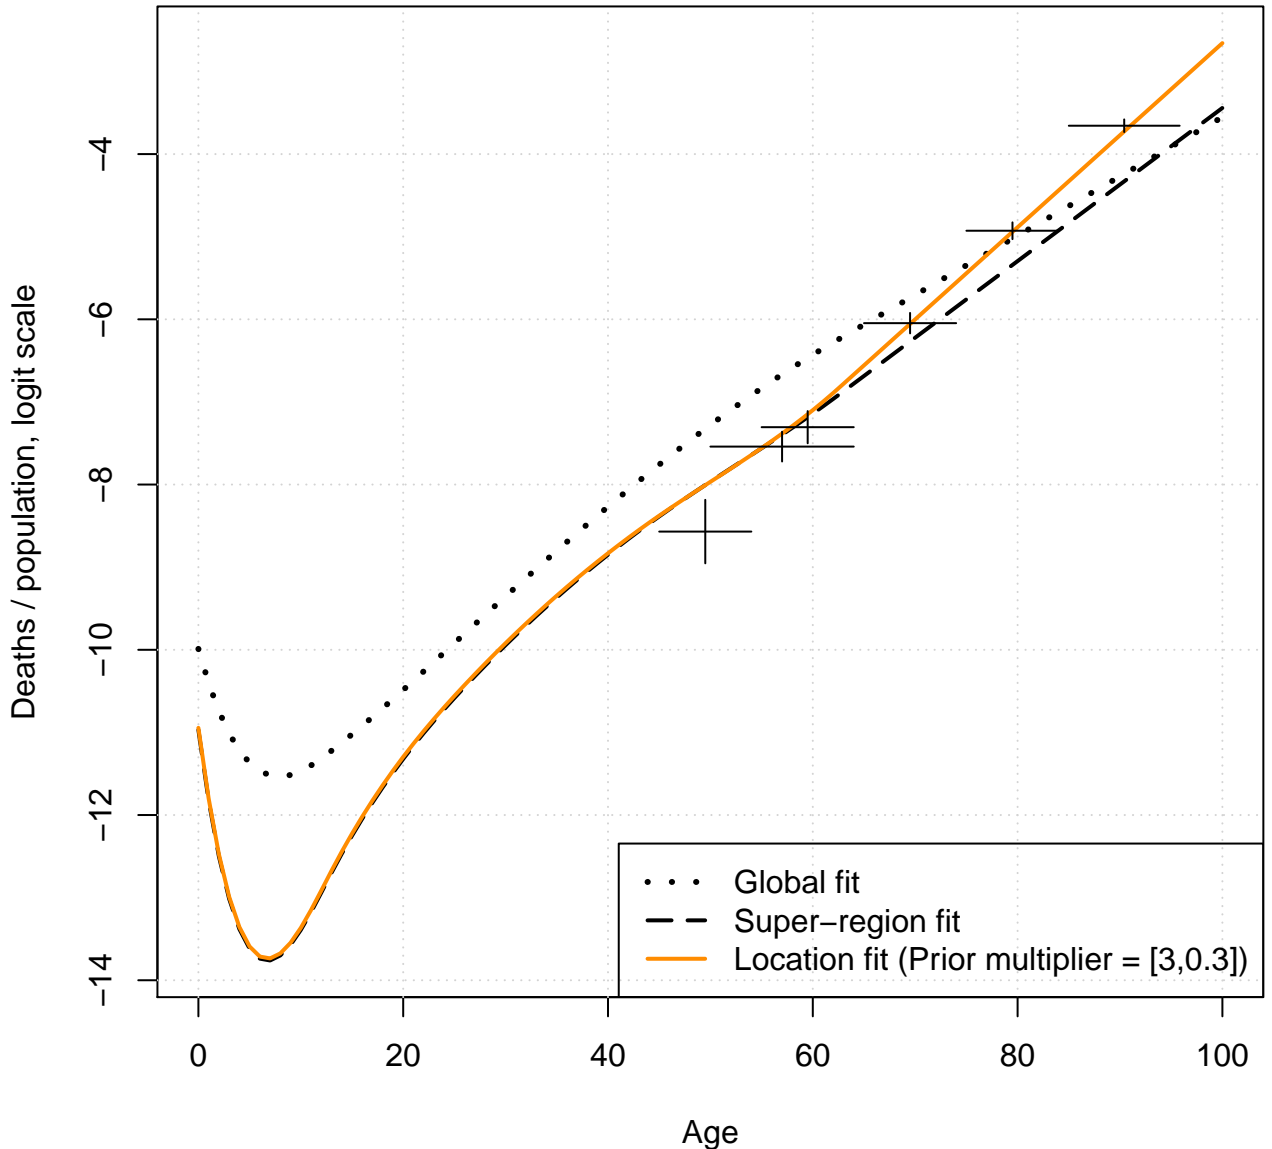

# South Carolina

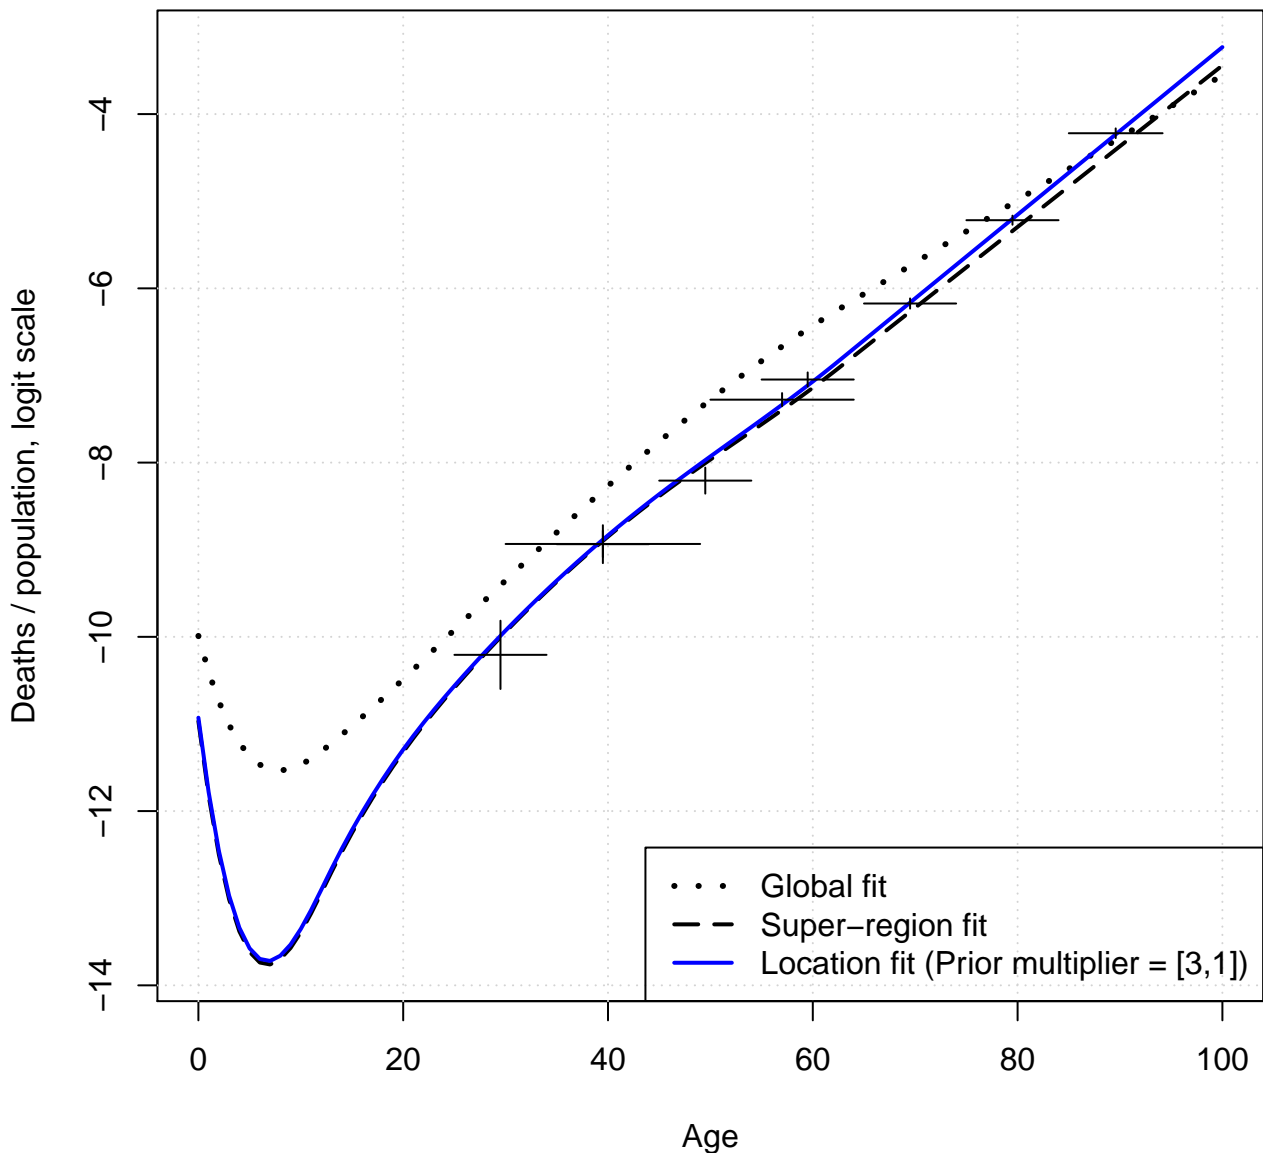

# South Dakota

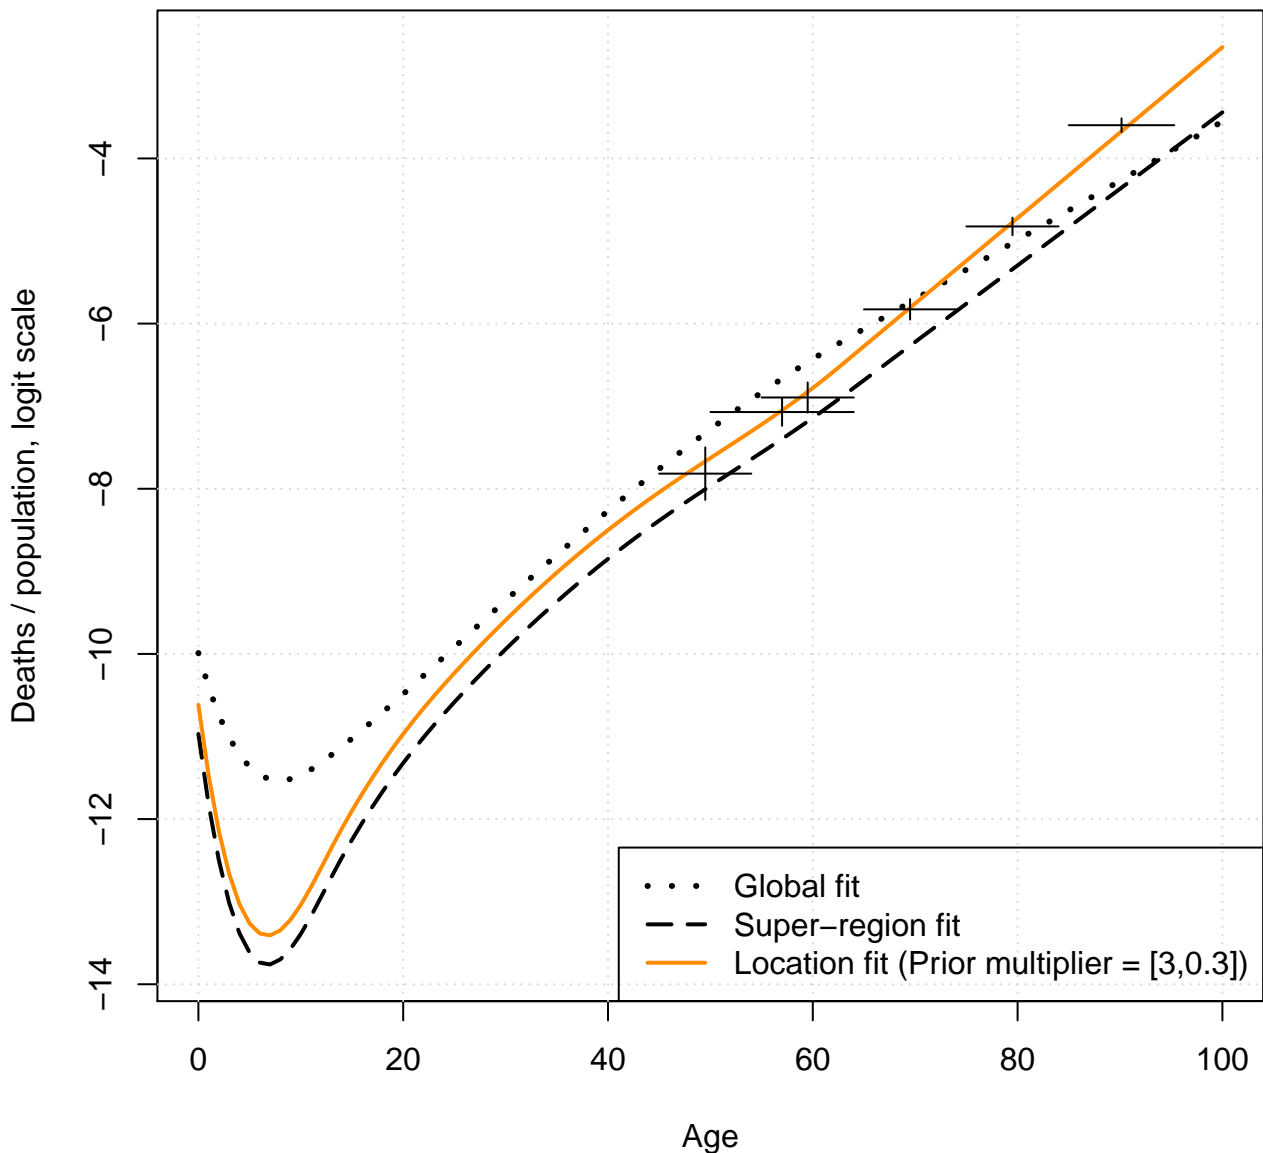

# Tennessee

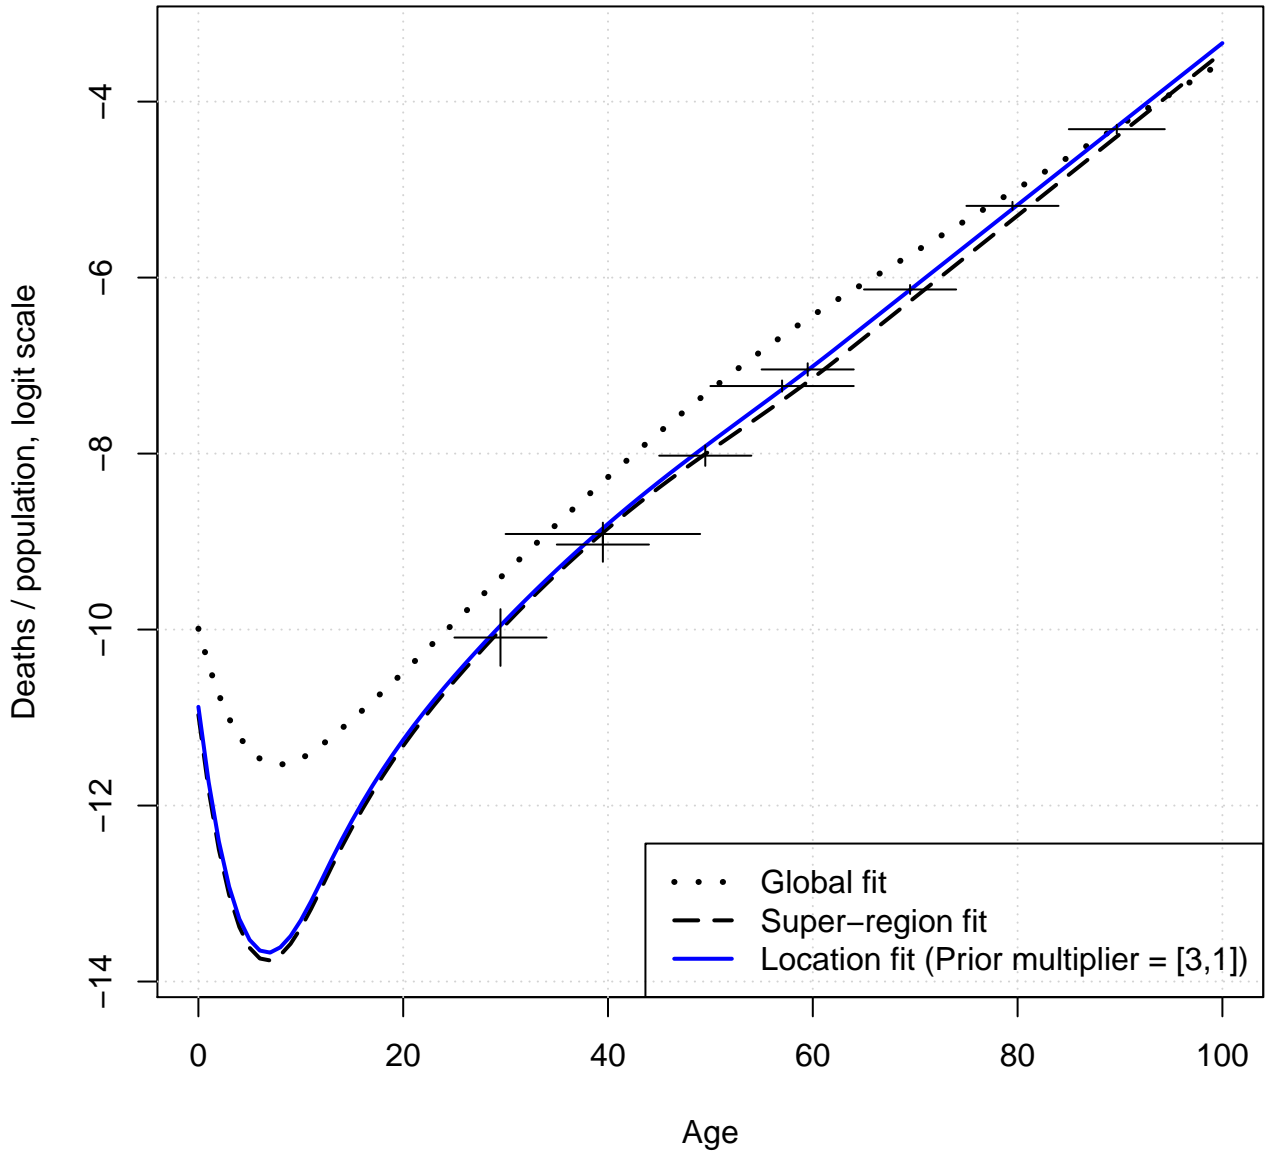

# Texas

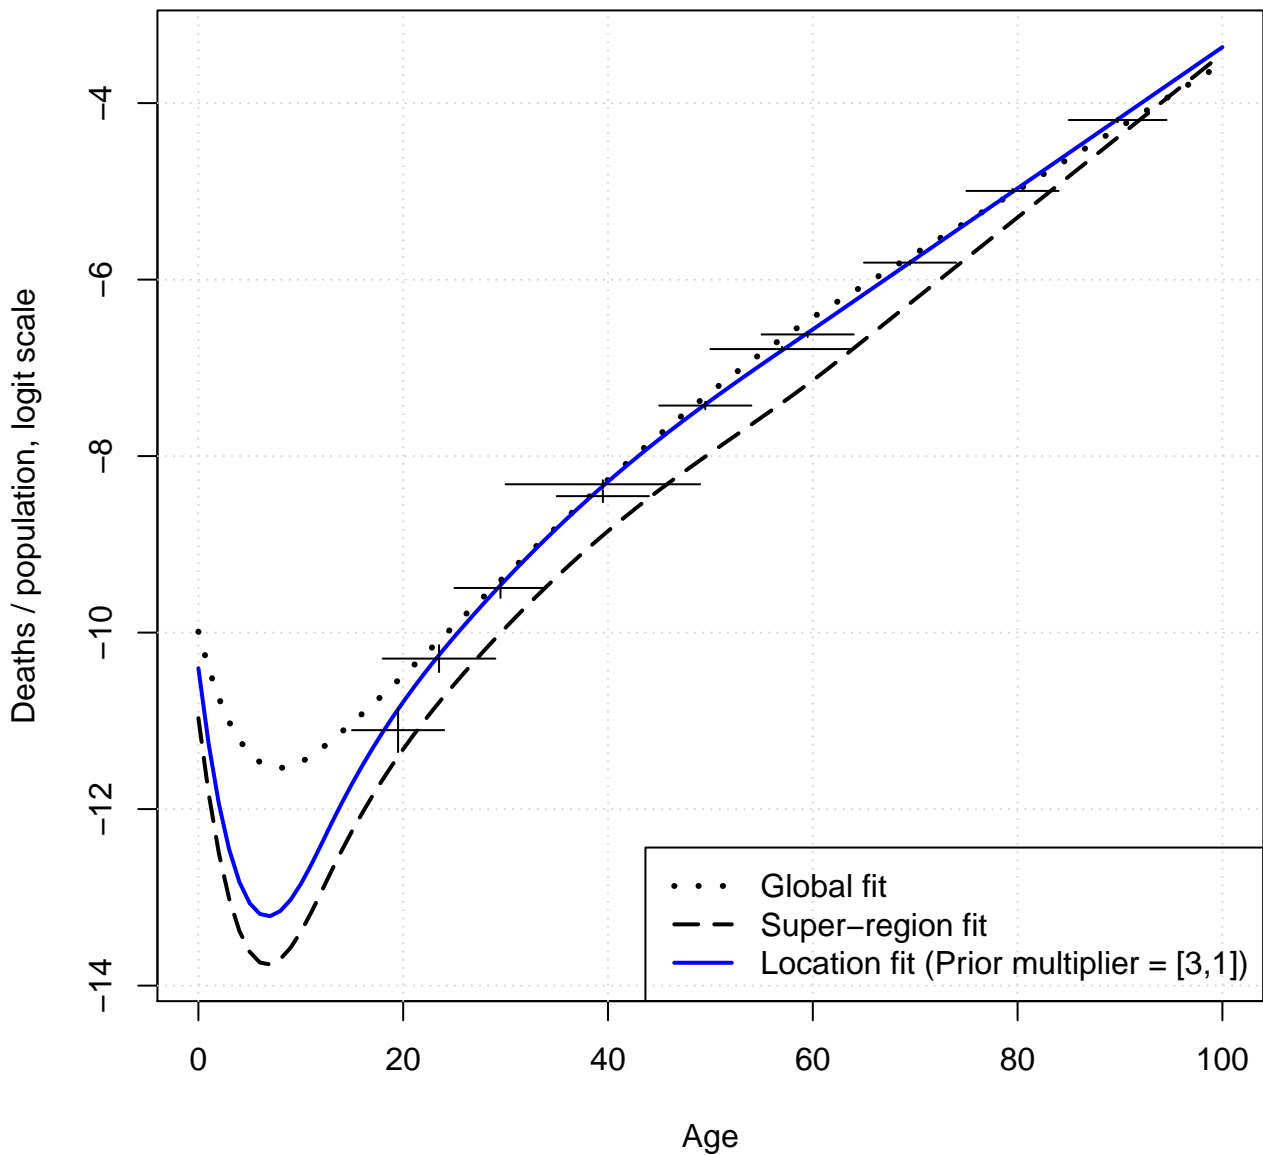

# Utah

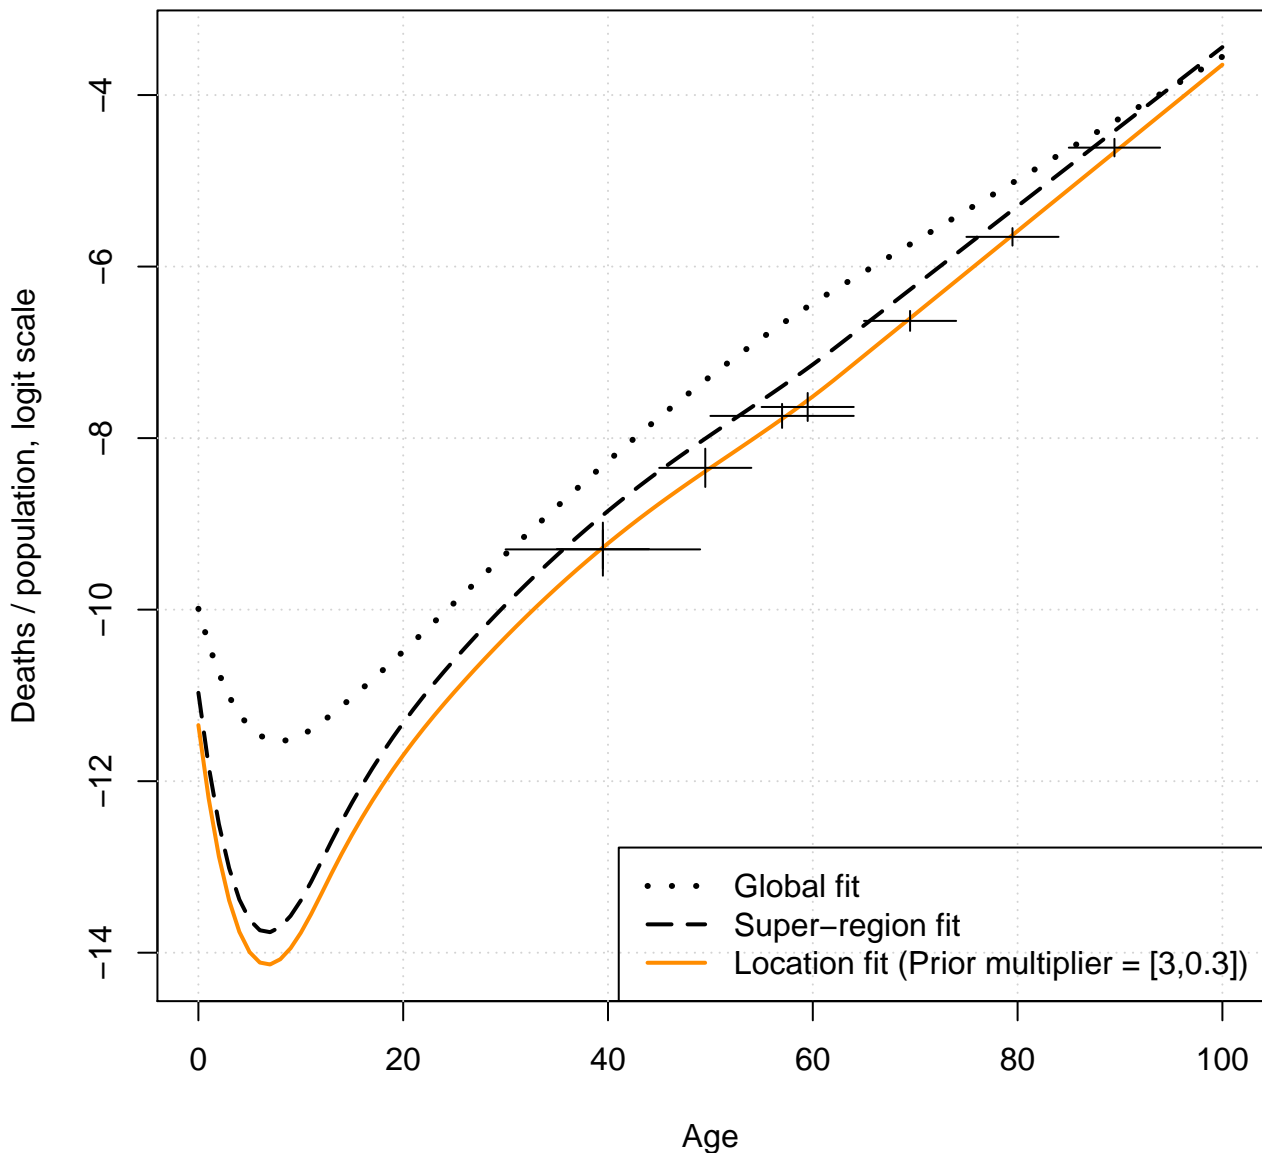

# Vermont

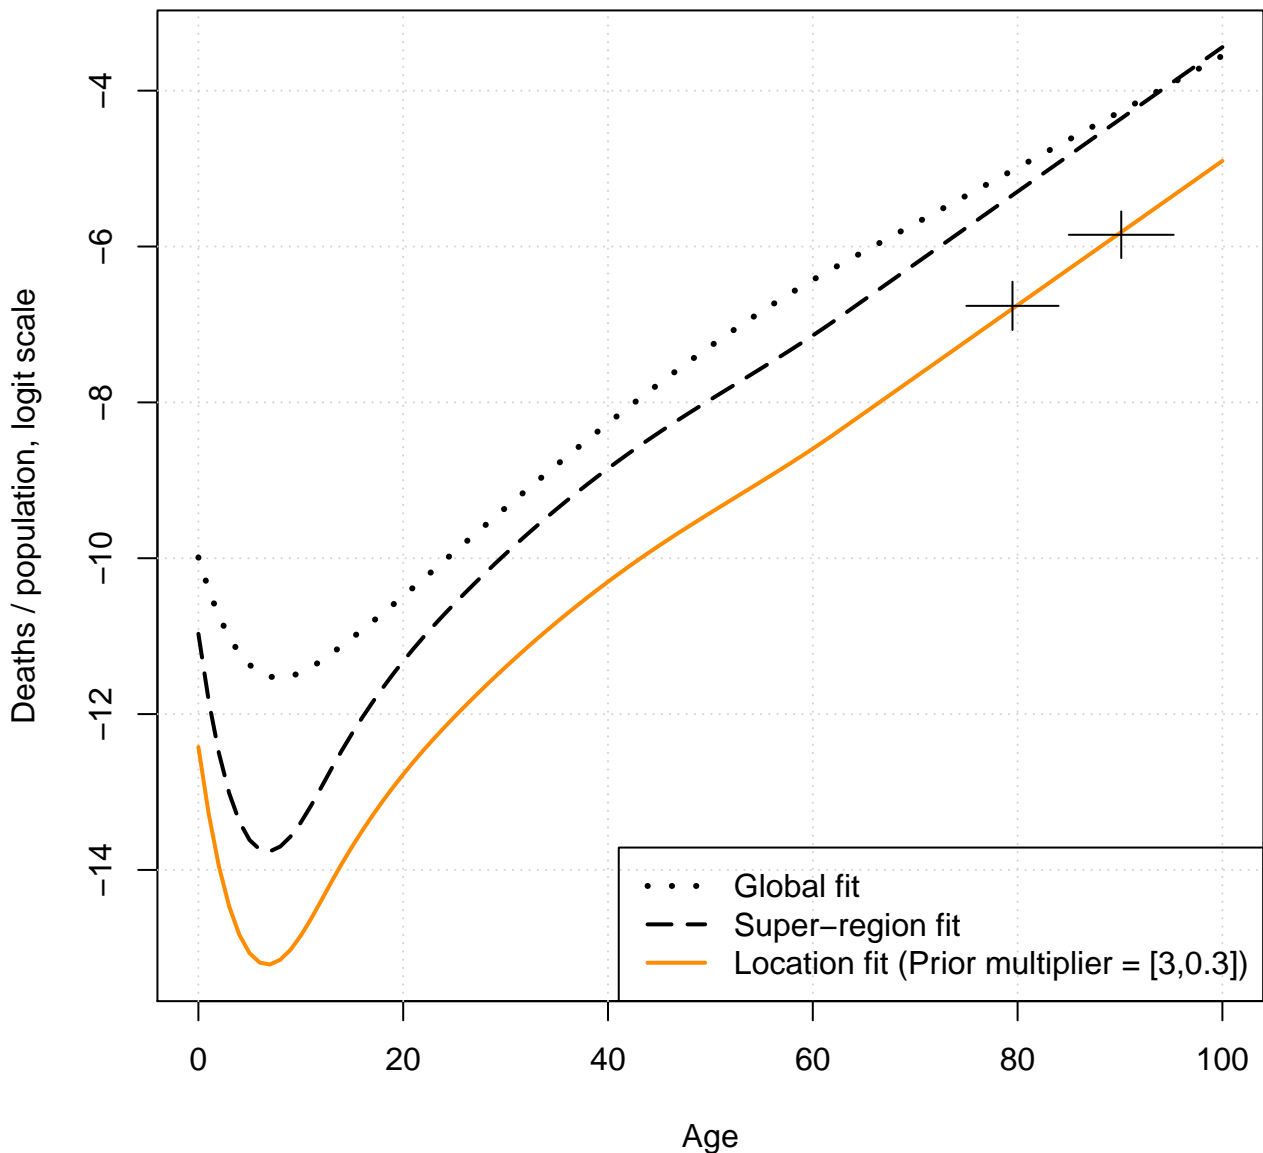



# Virginia

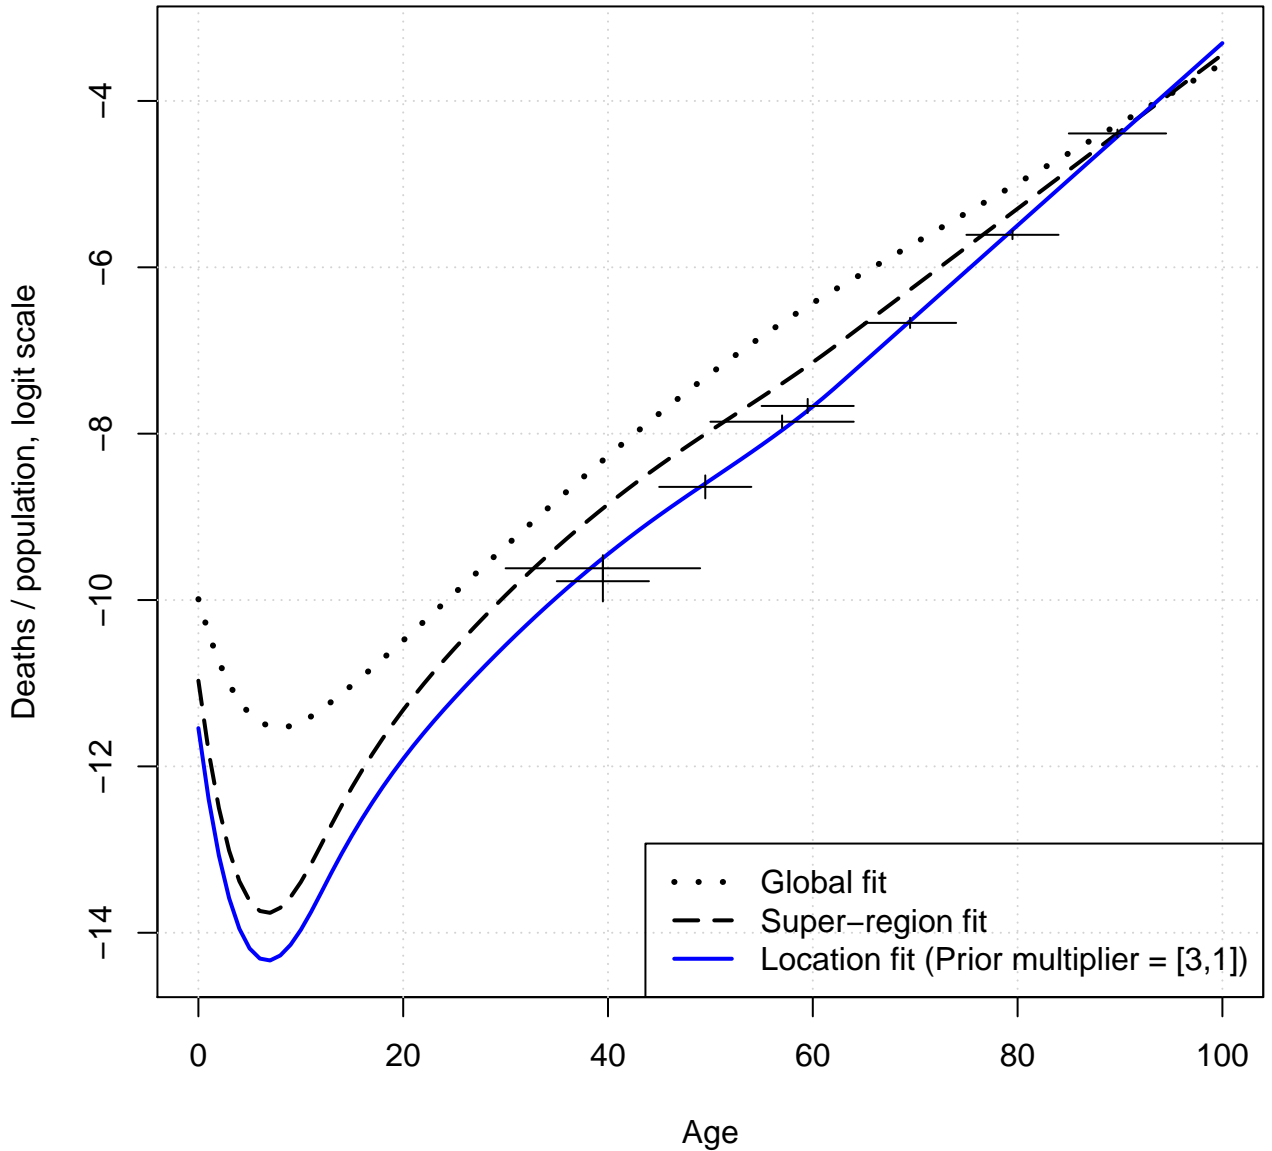

# Washington

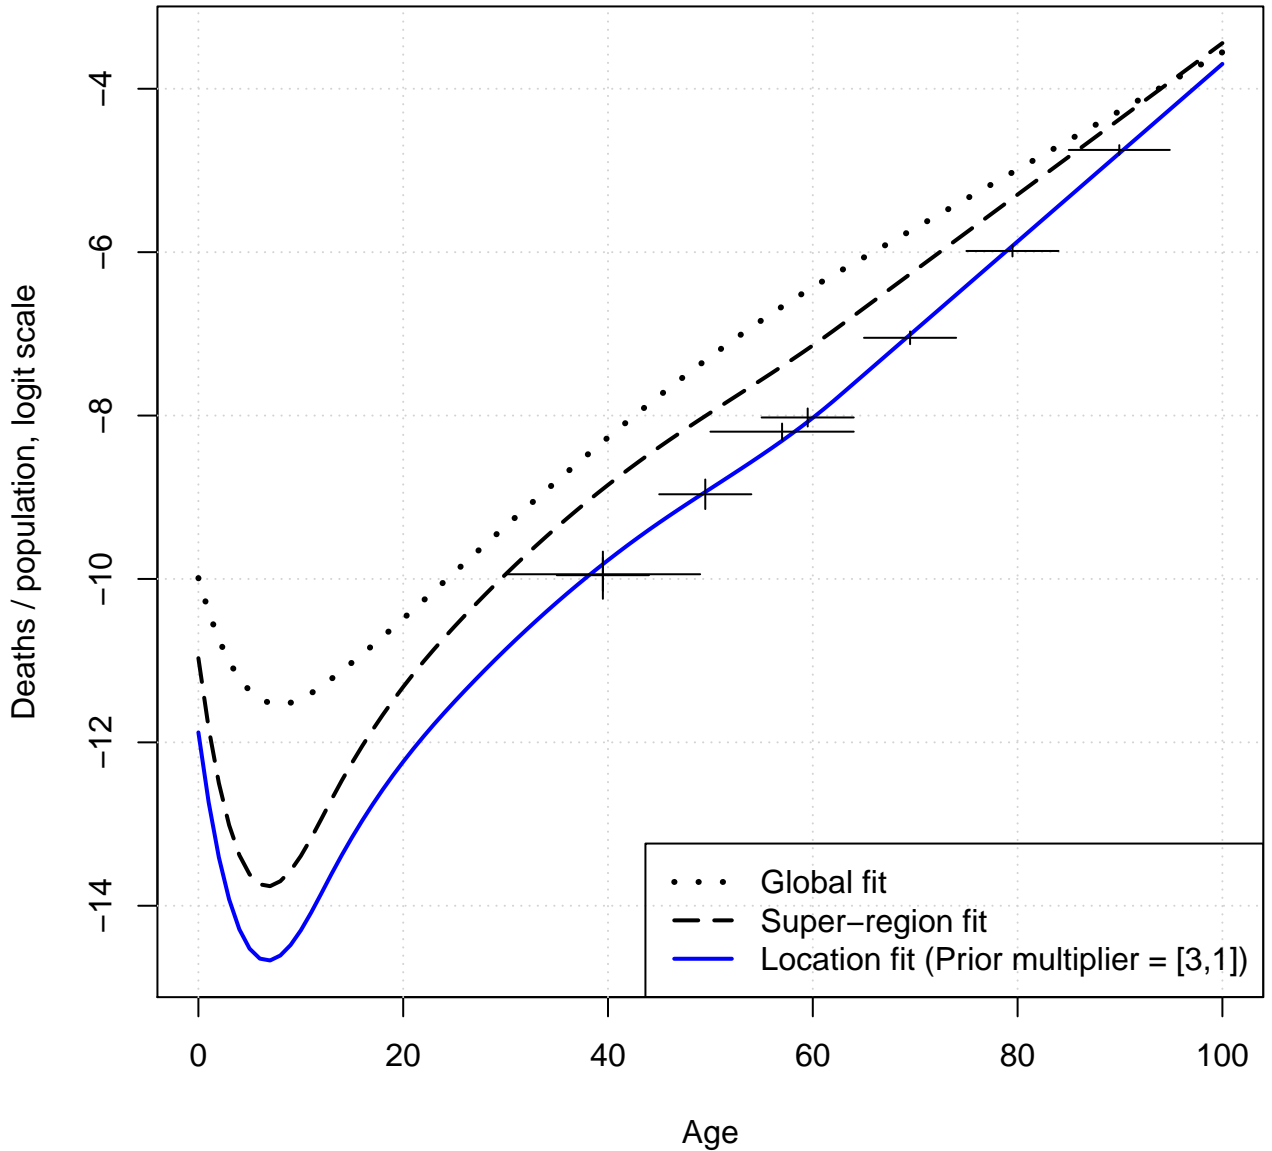

# West Virginia

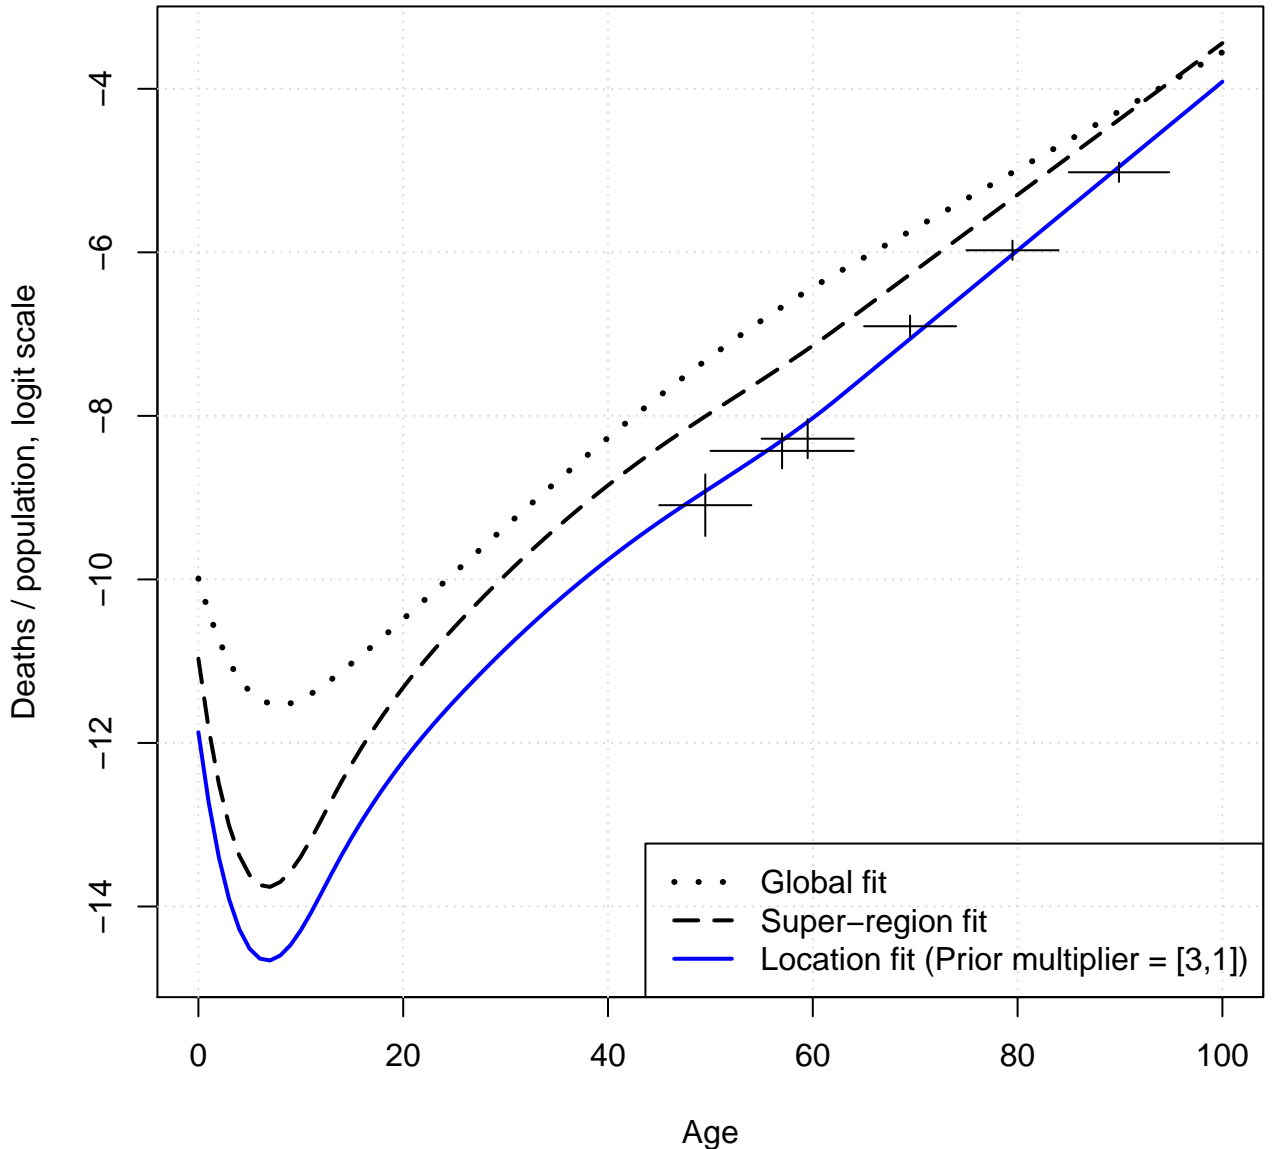

# Wisconsin

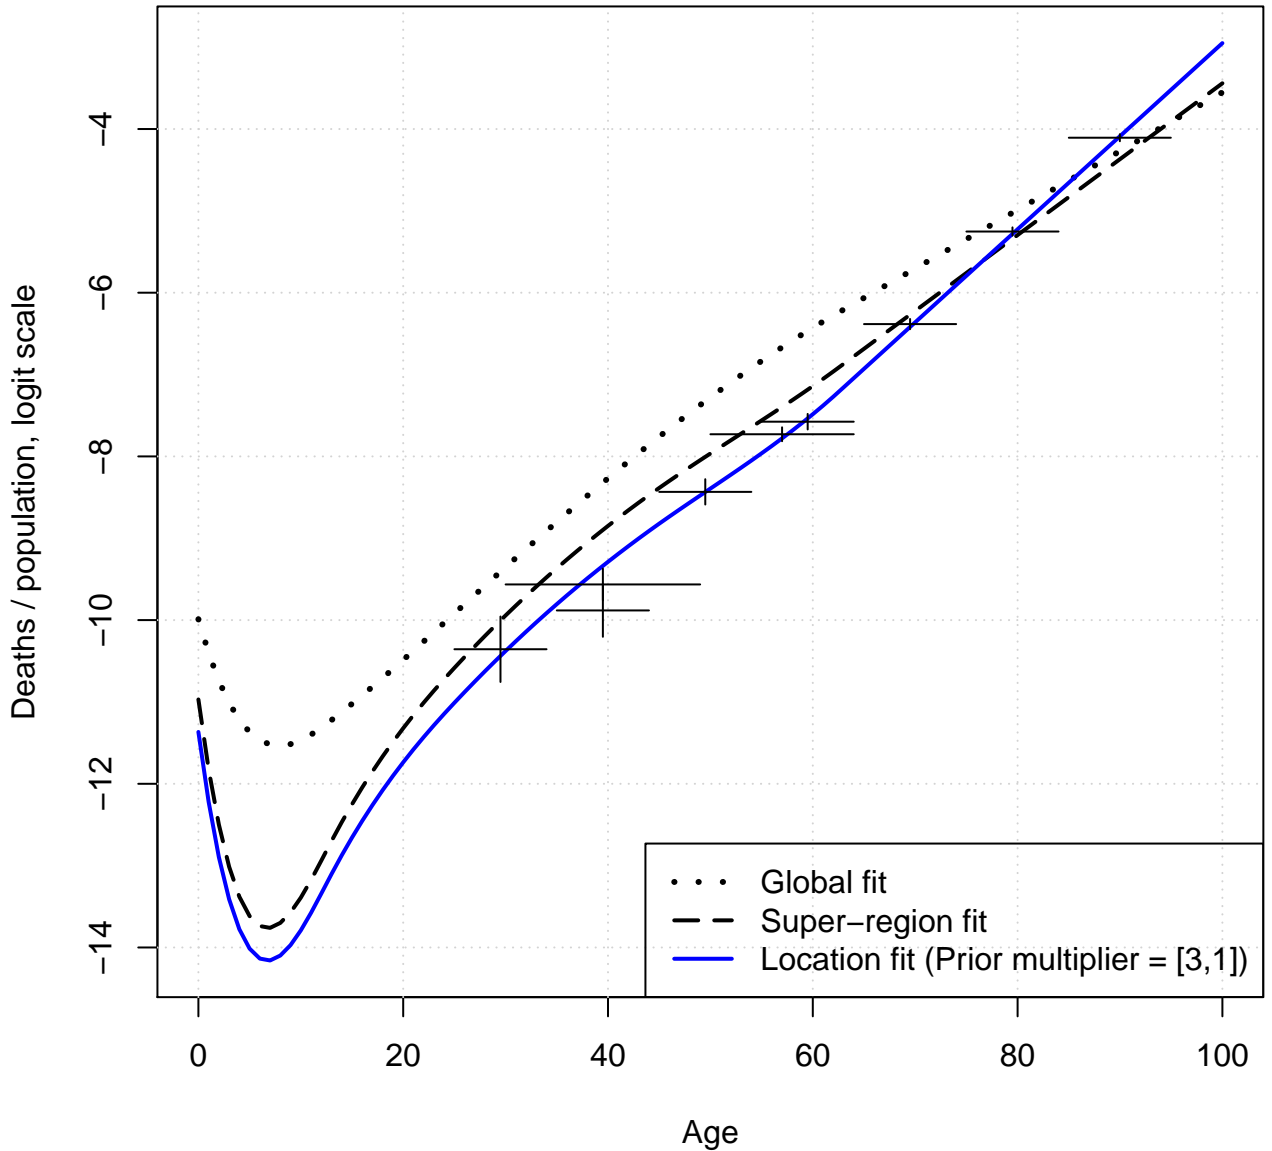

# Wyoming

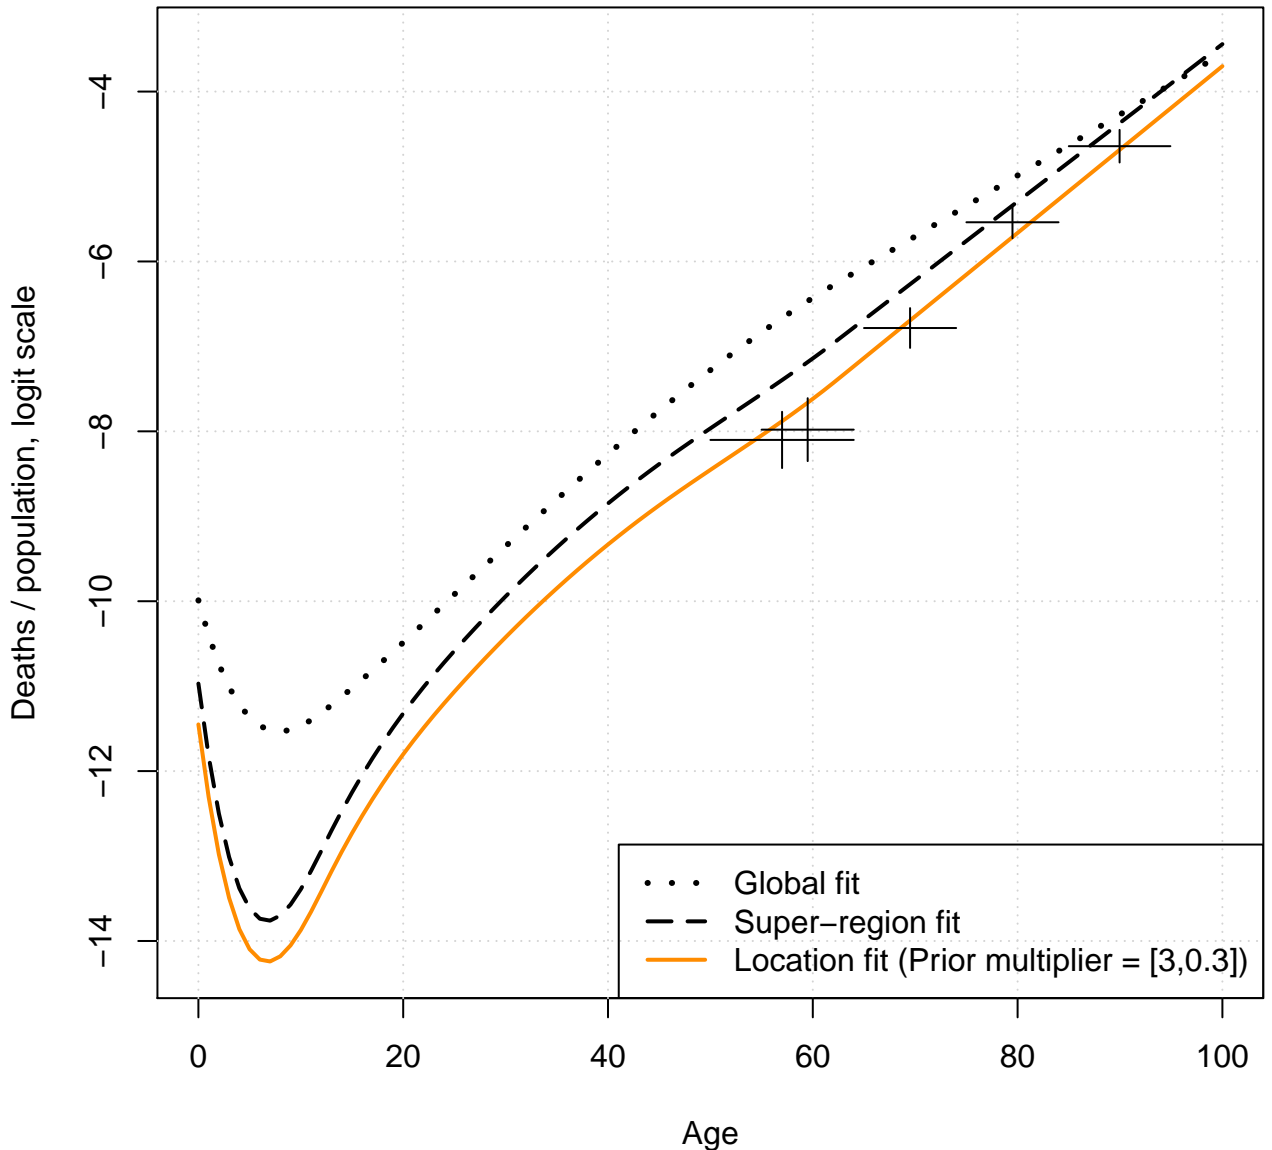

## Aguascalientes

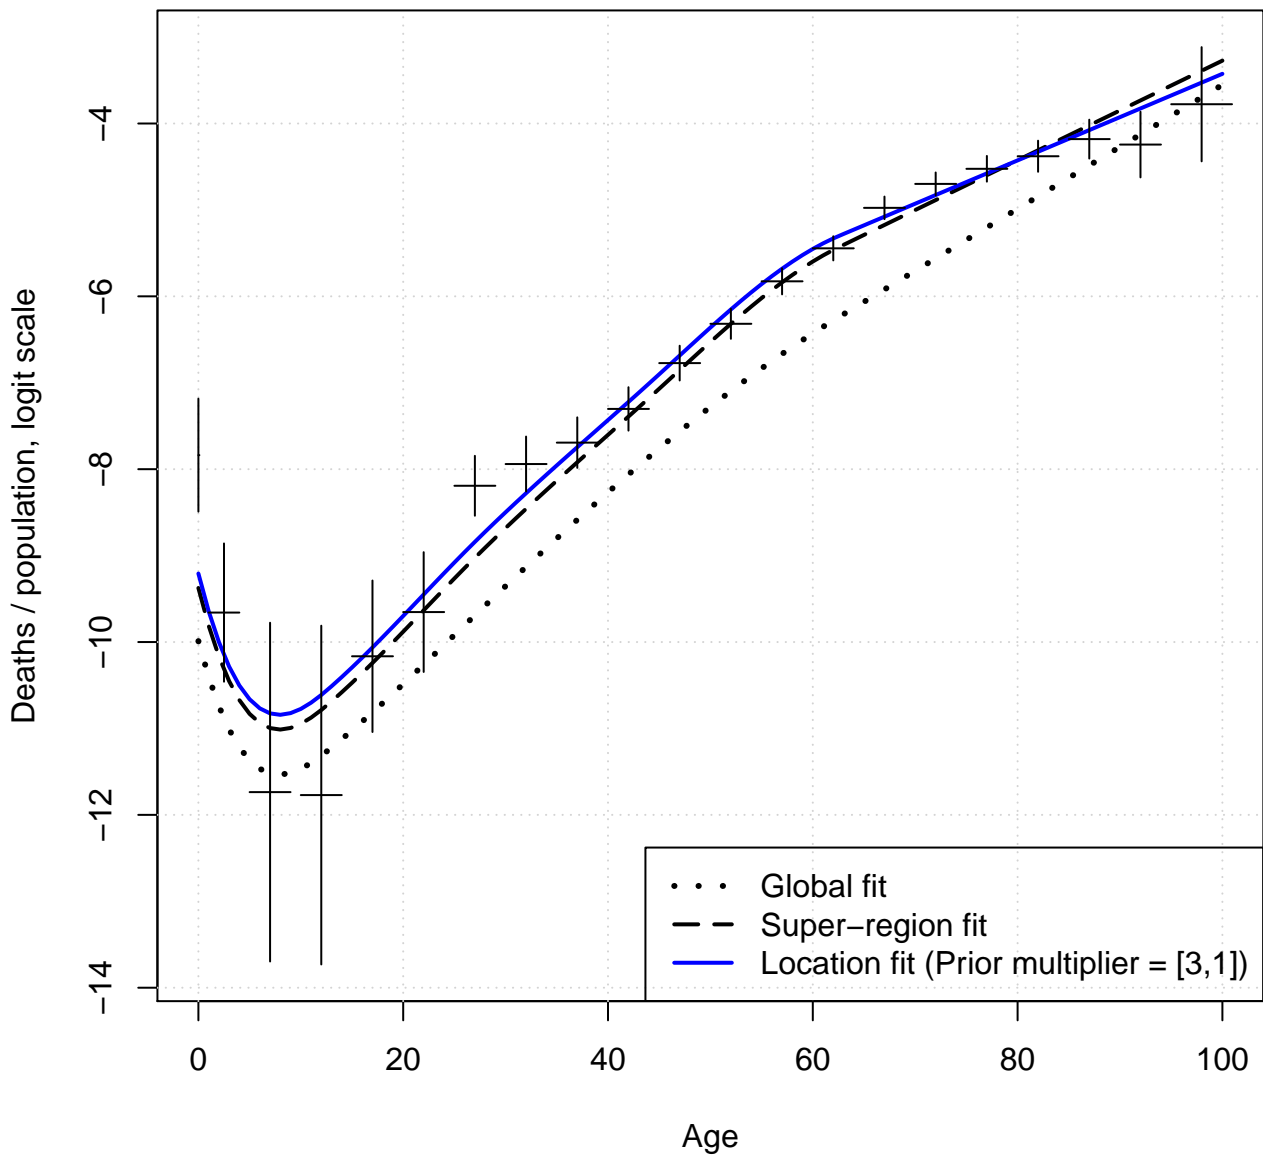

# Baja California

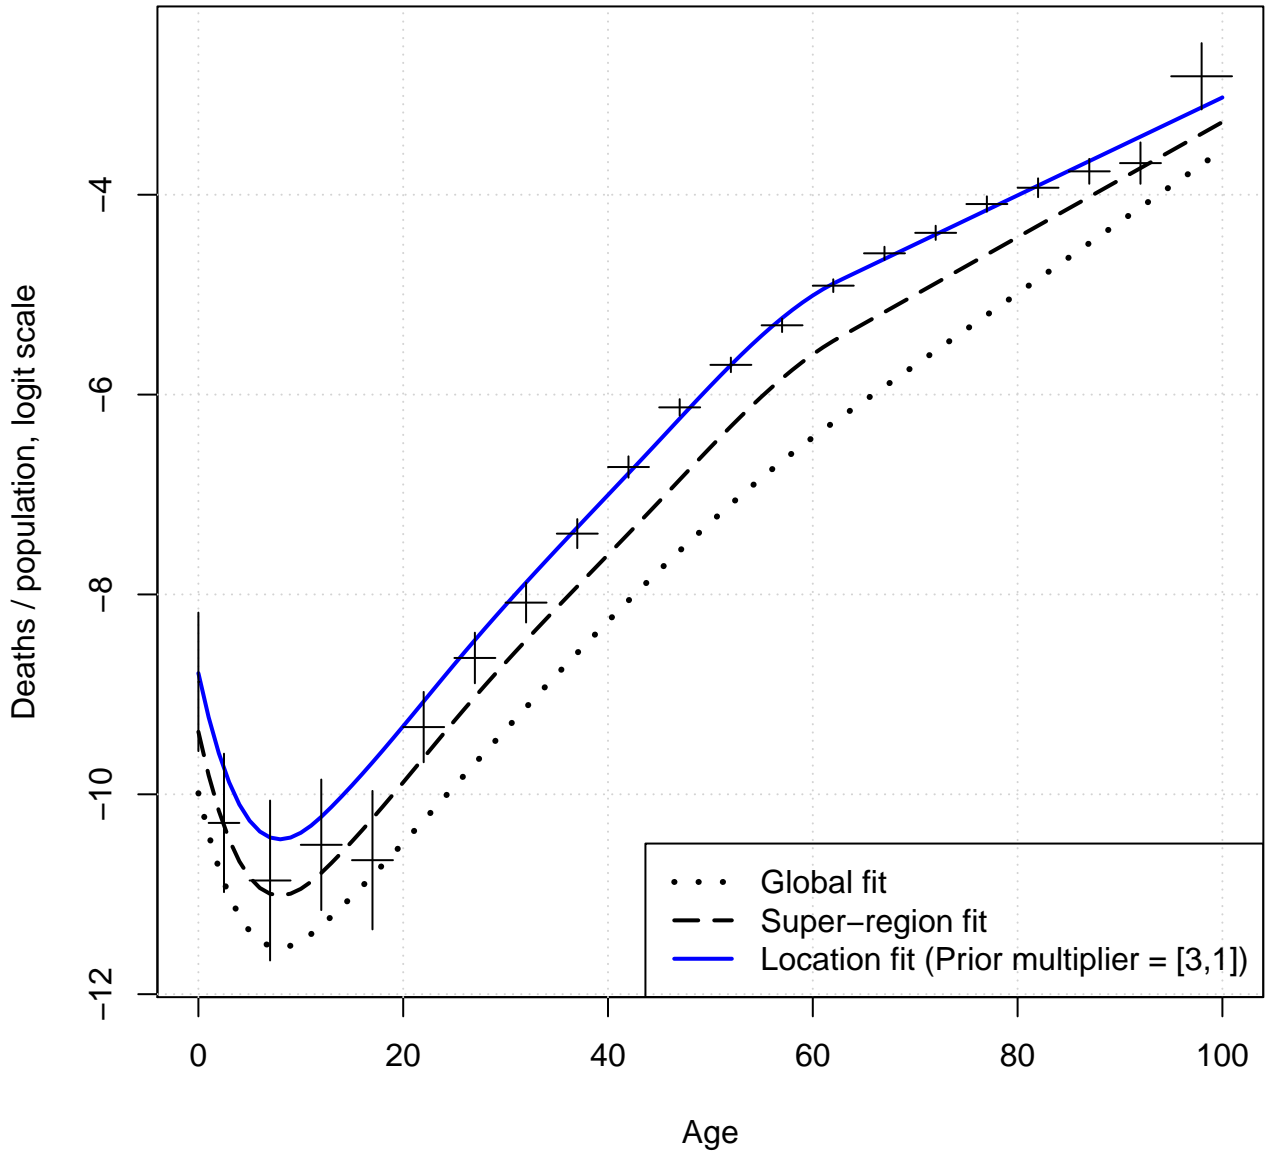

# Baja California Sur

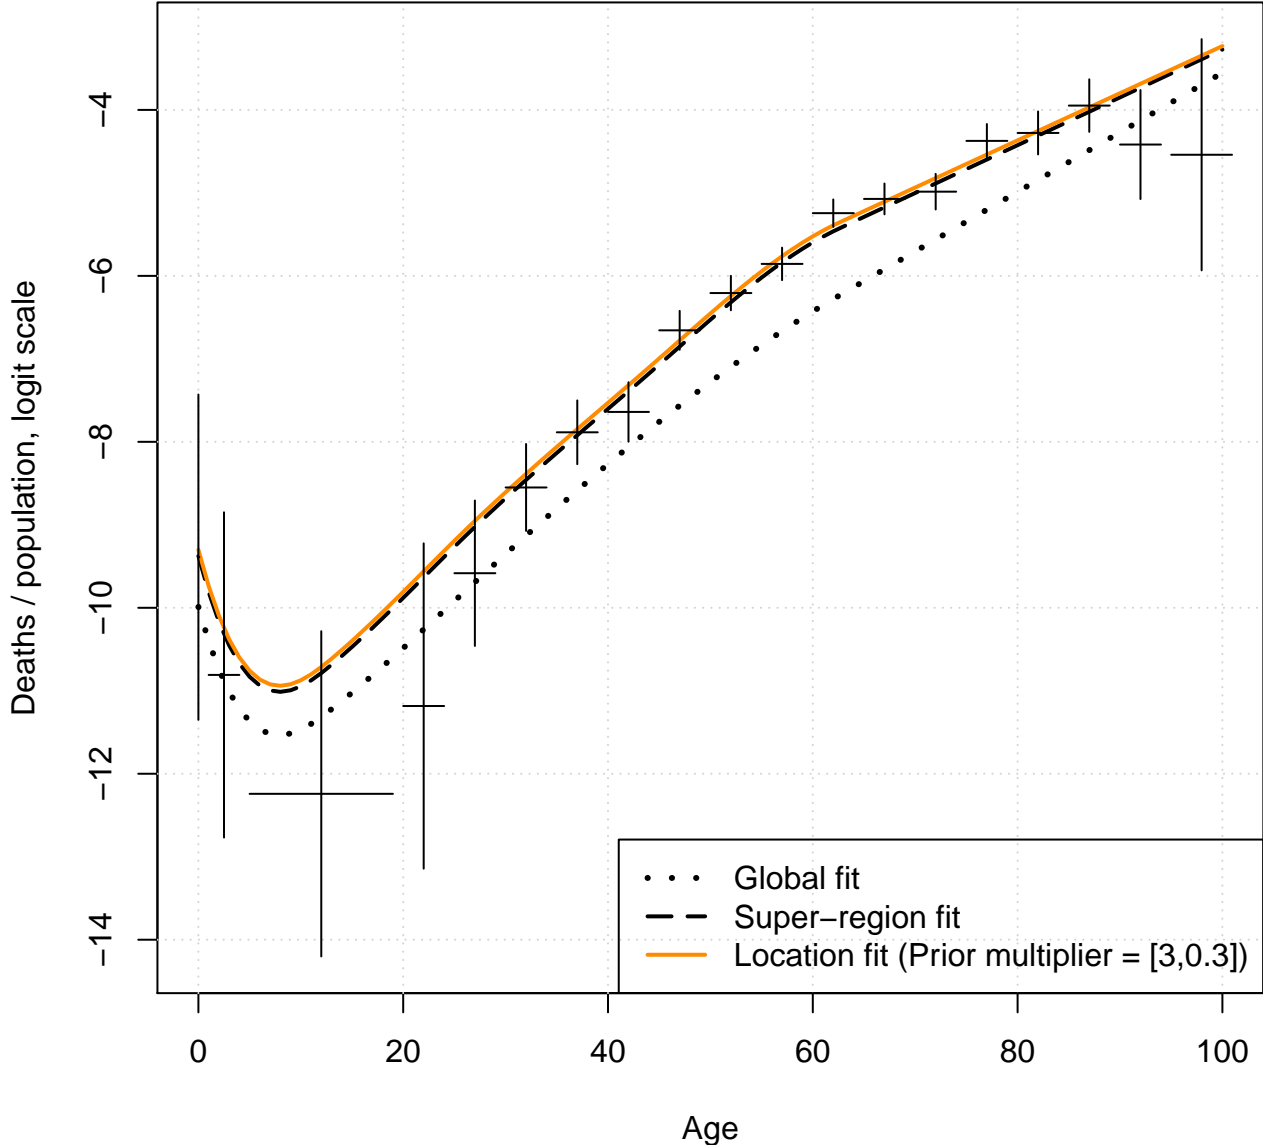



# Campeche

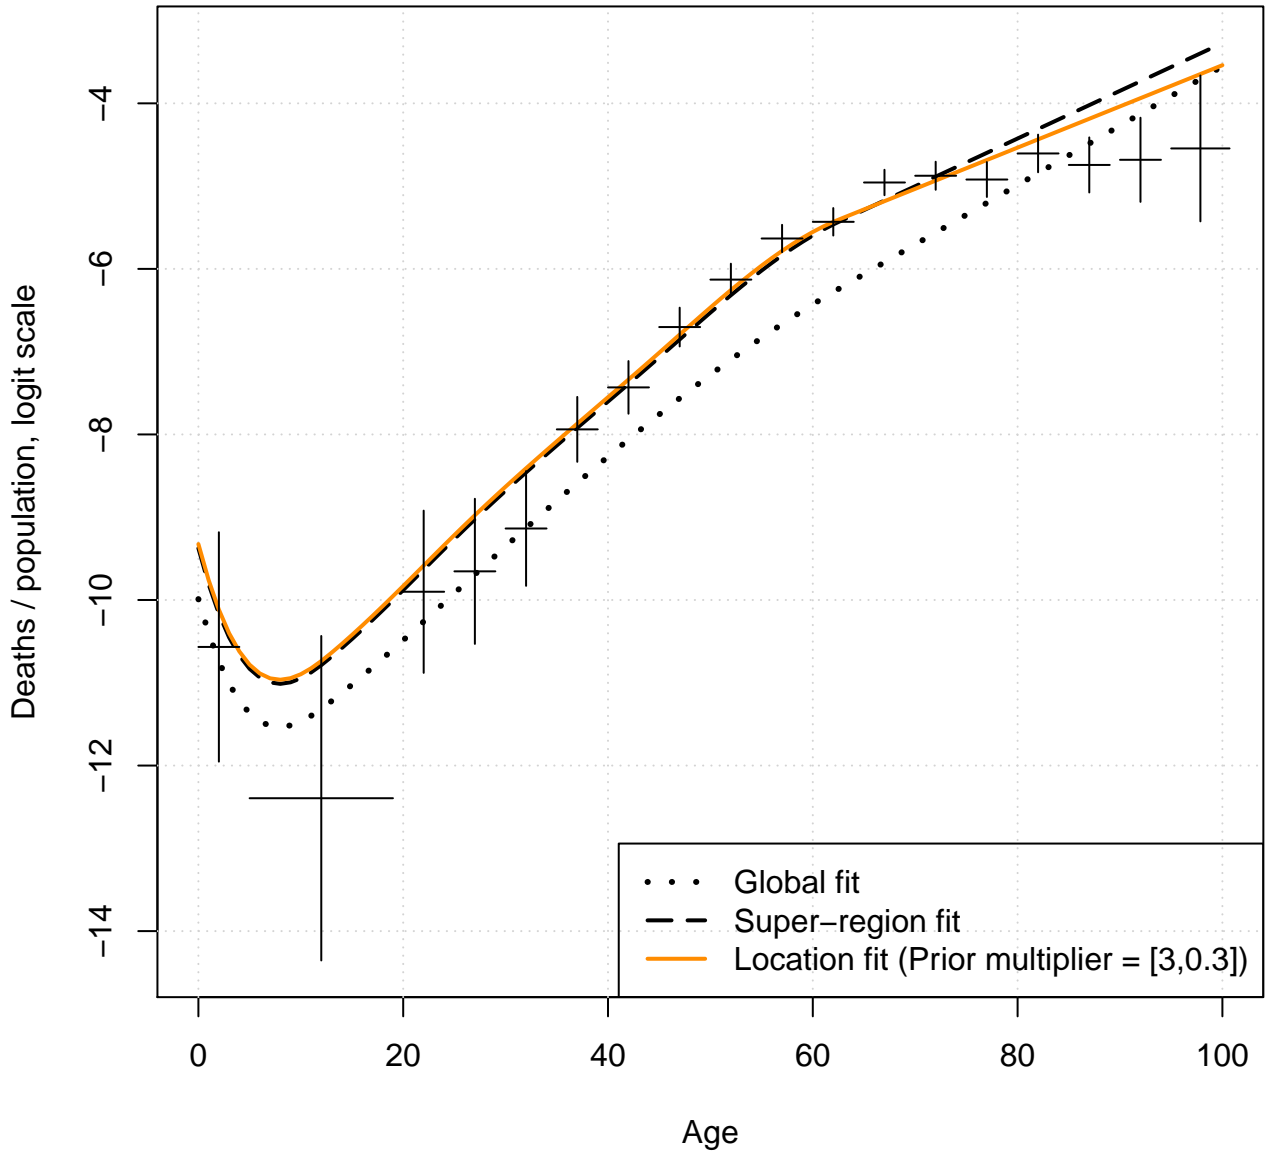

# Coahuila

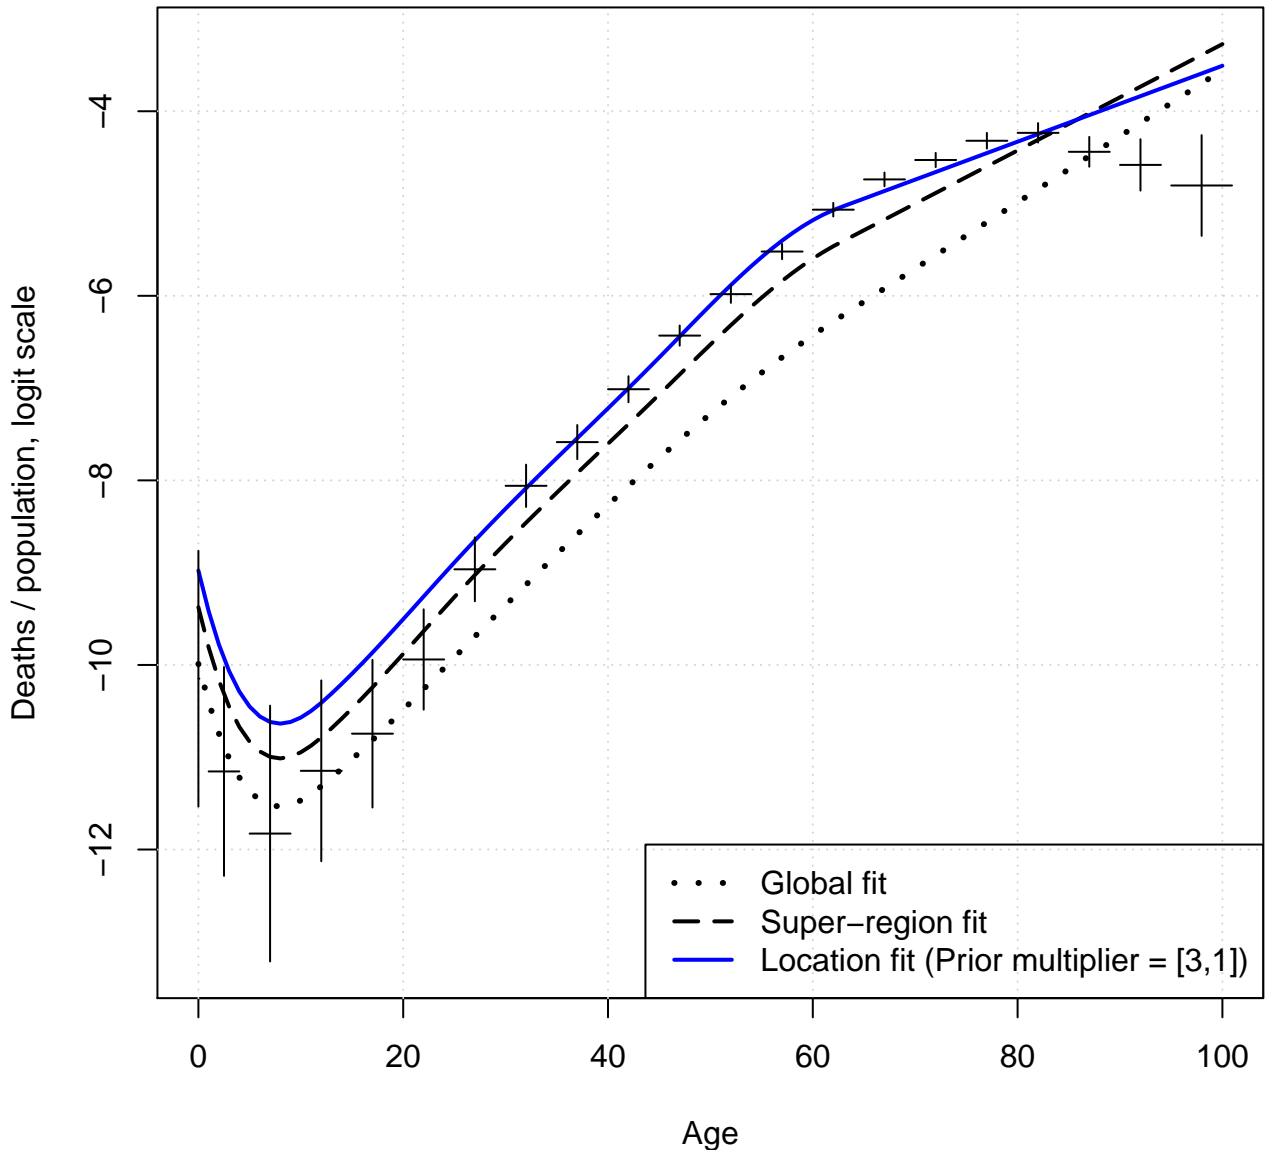

# Colima

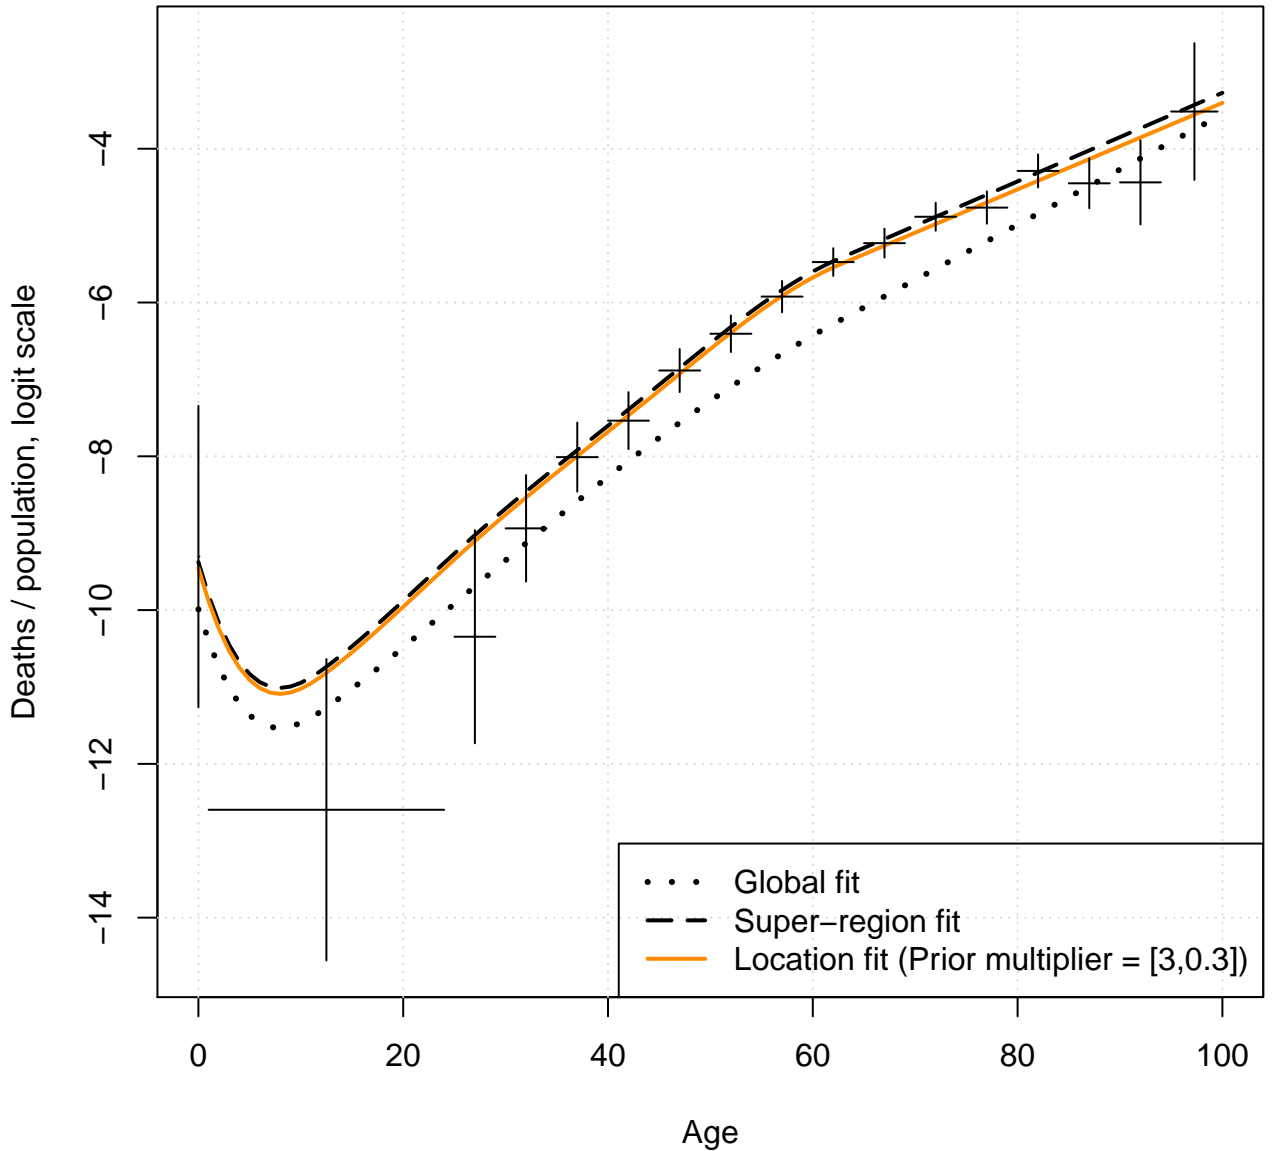

# Chiapas

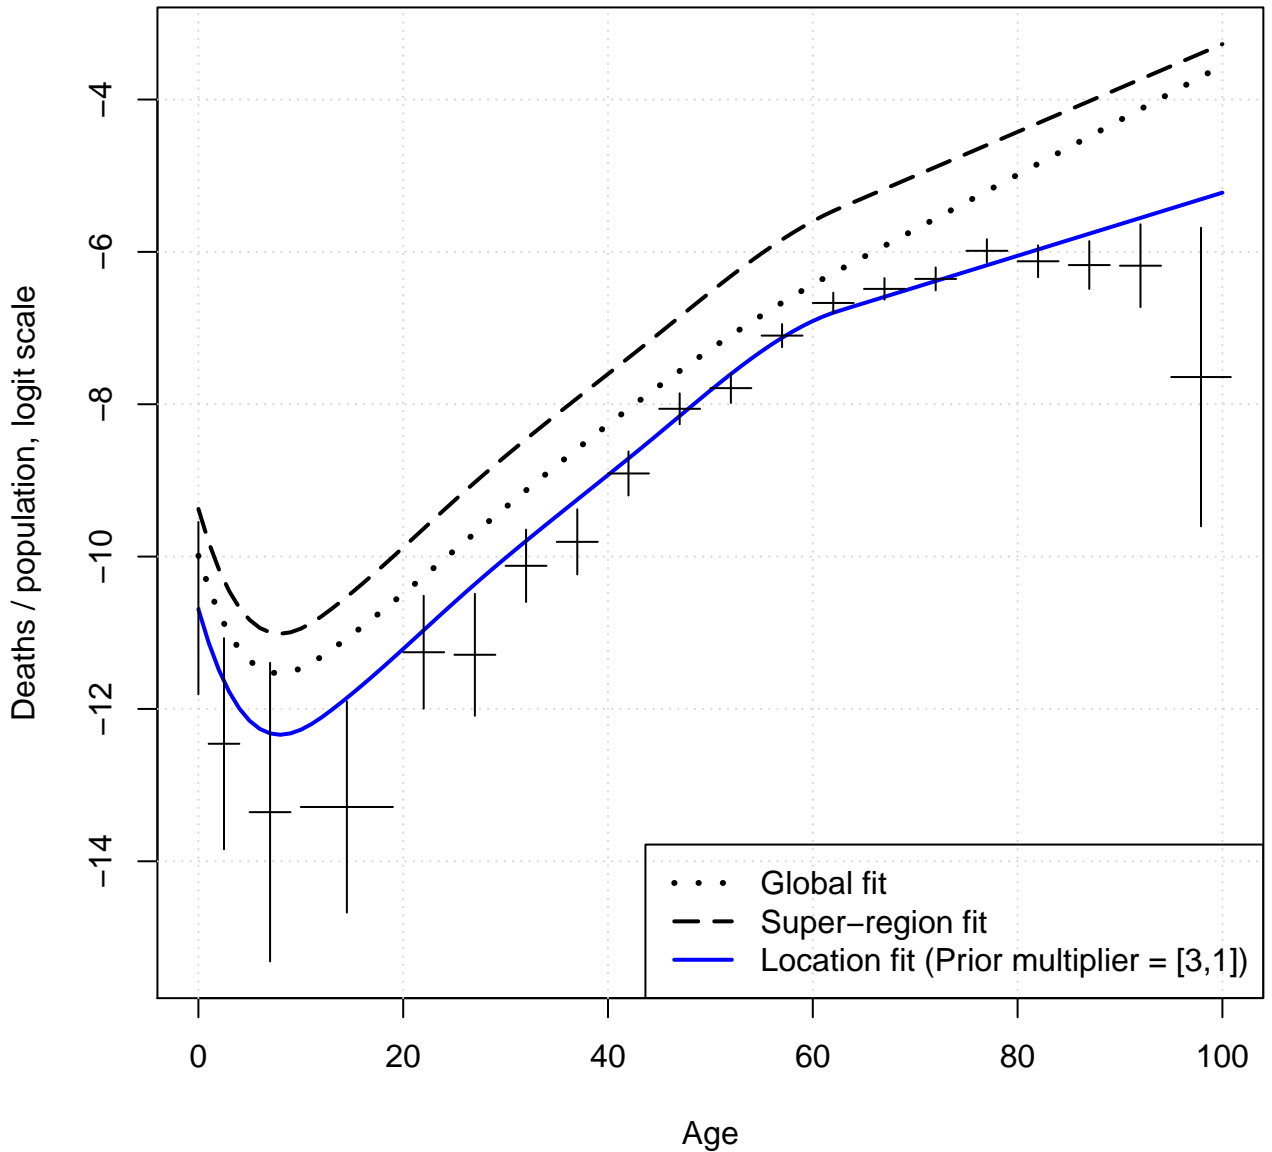

# Chihuahua

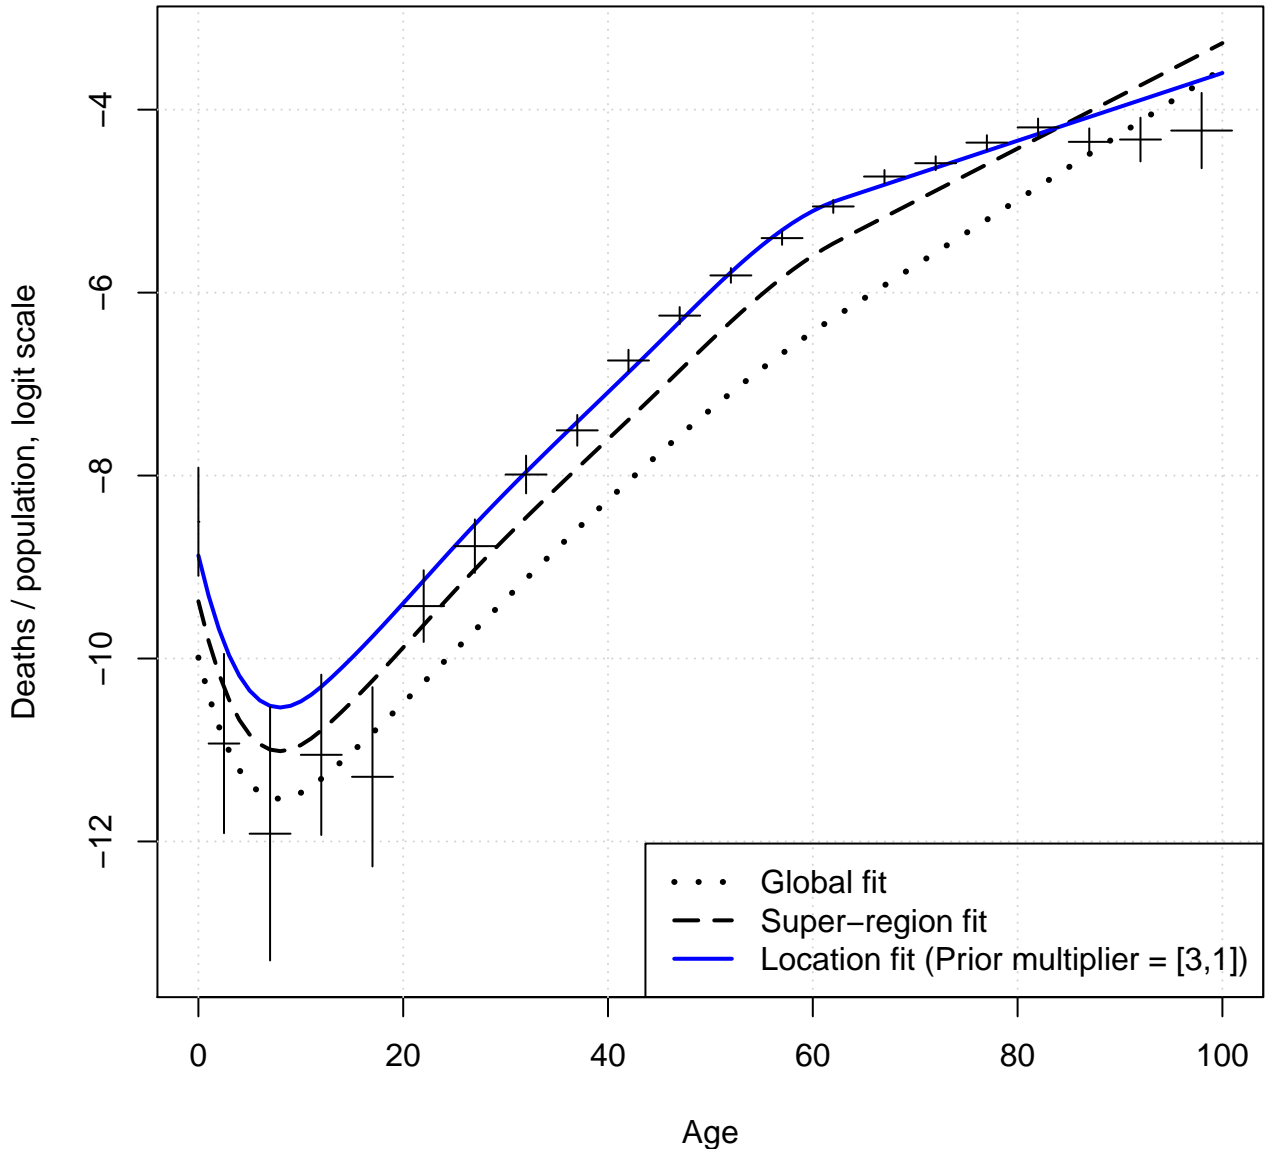

# Mexico City

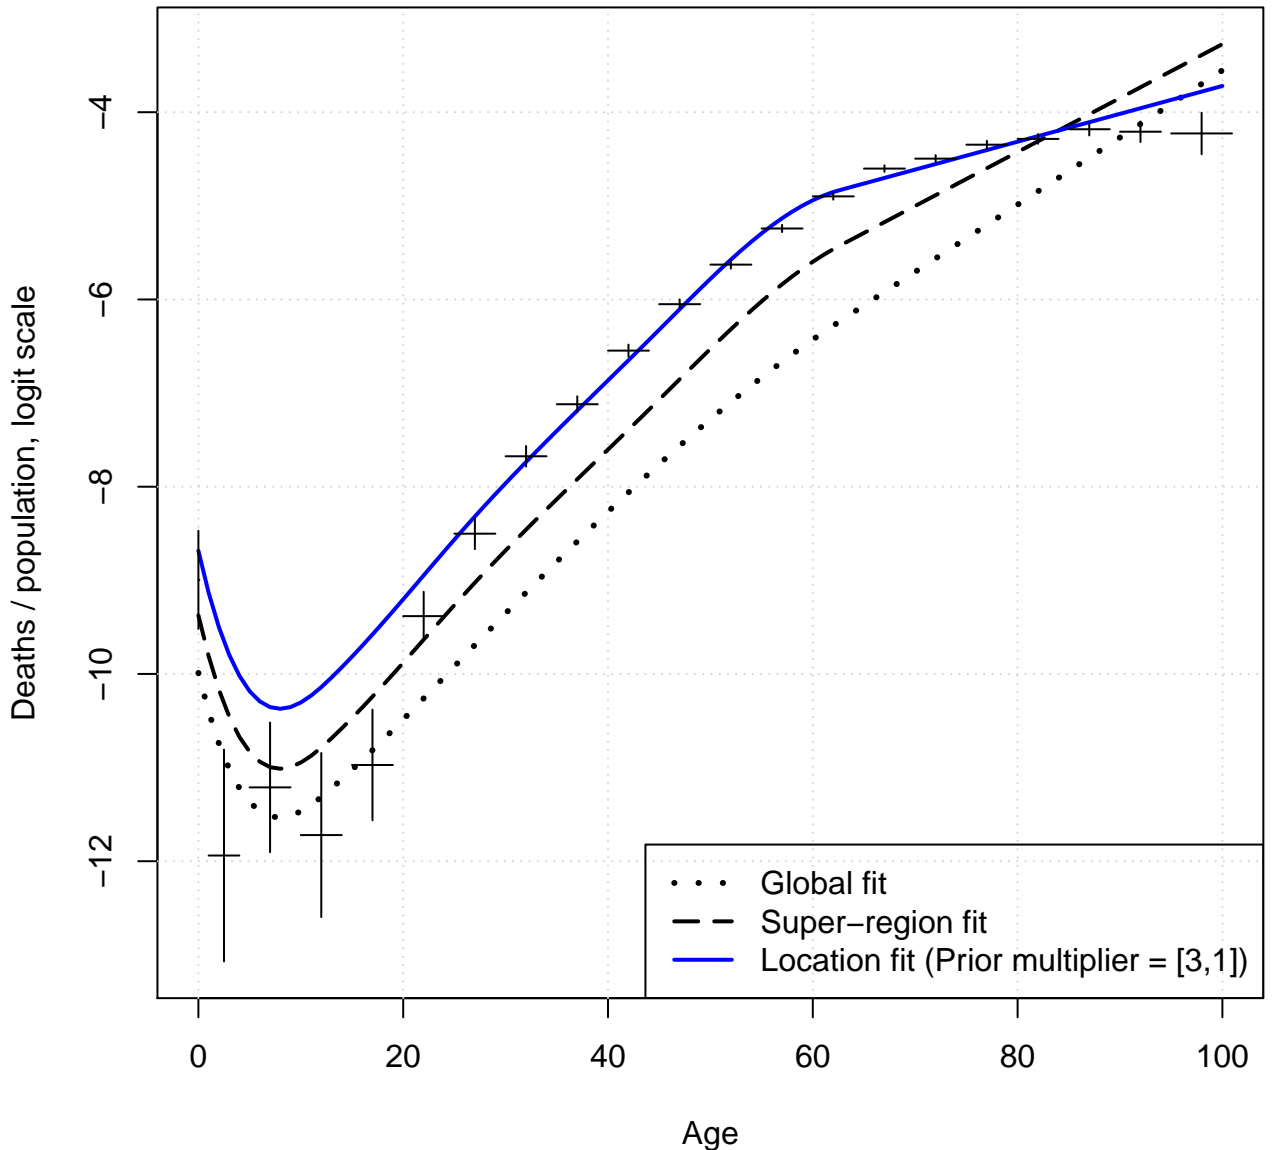

# Durango

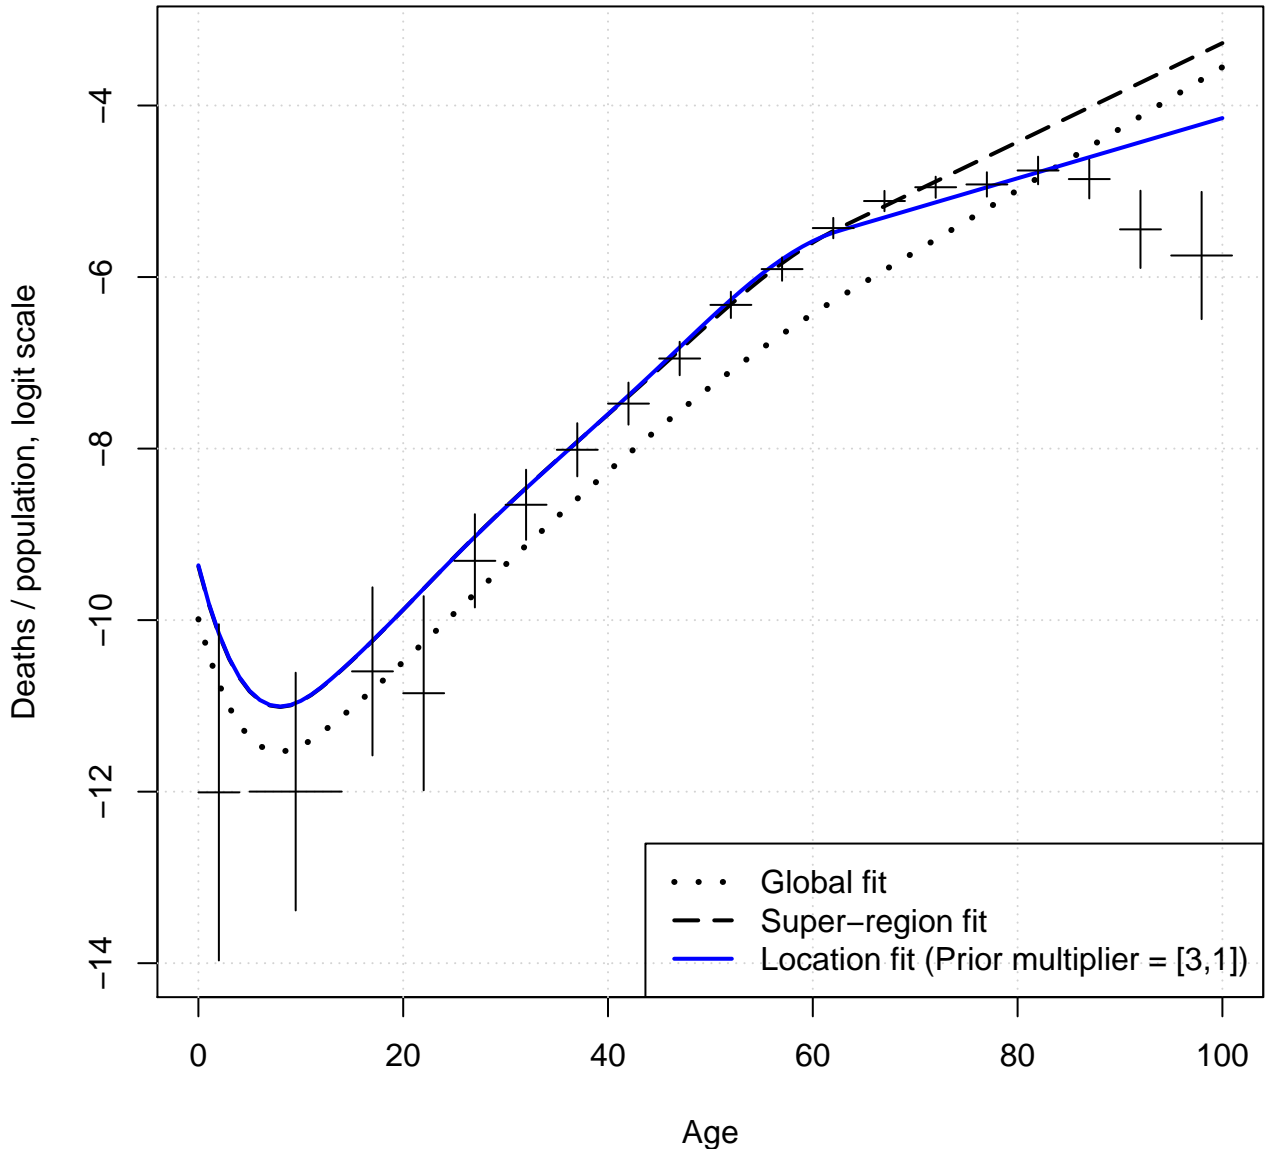

# Guanajuato

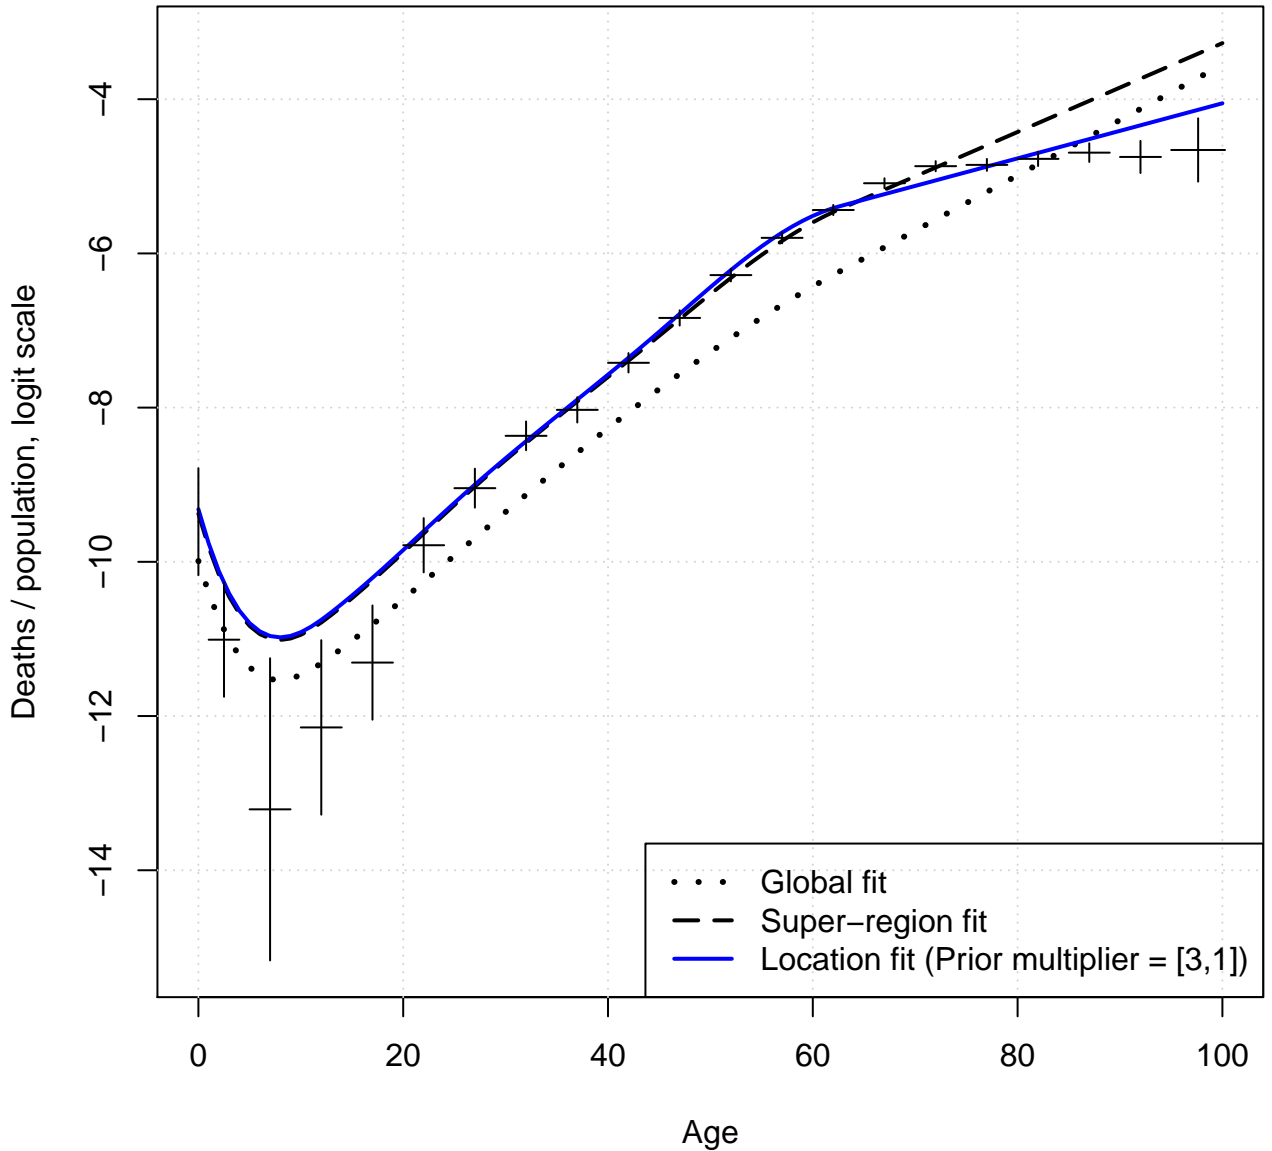



# Guerrero

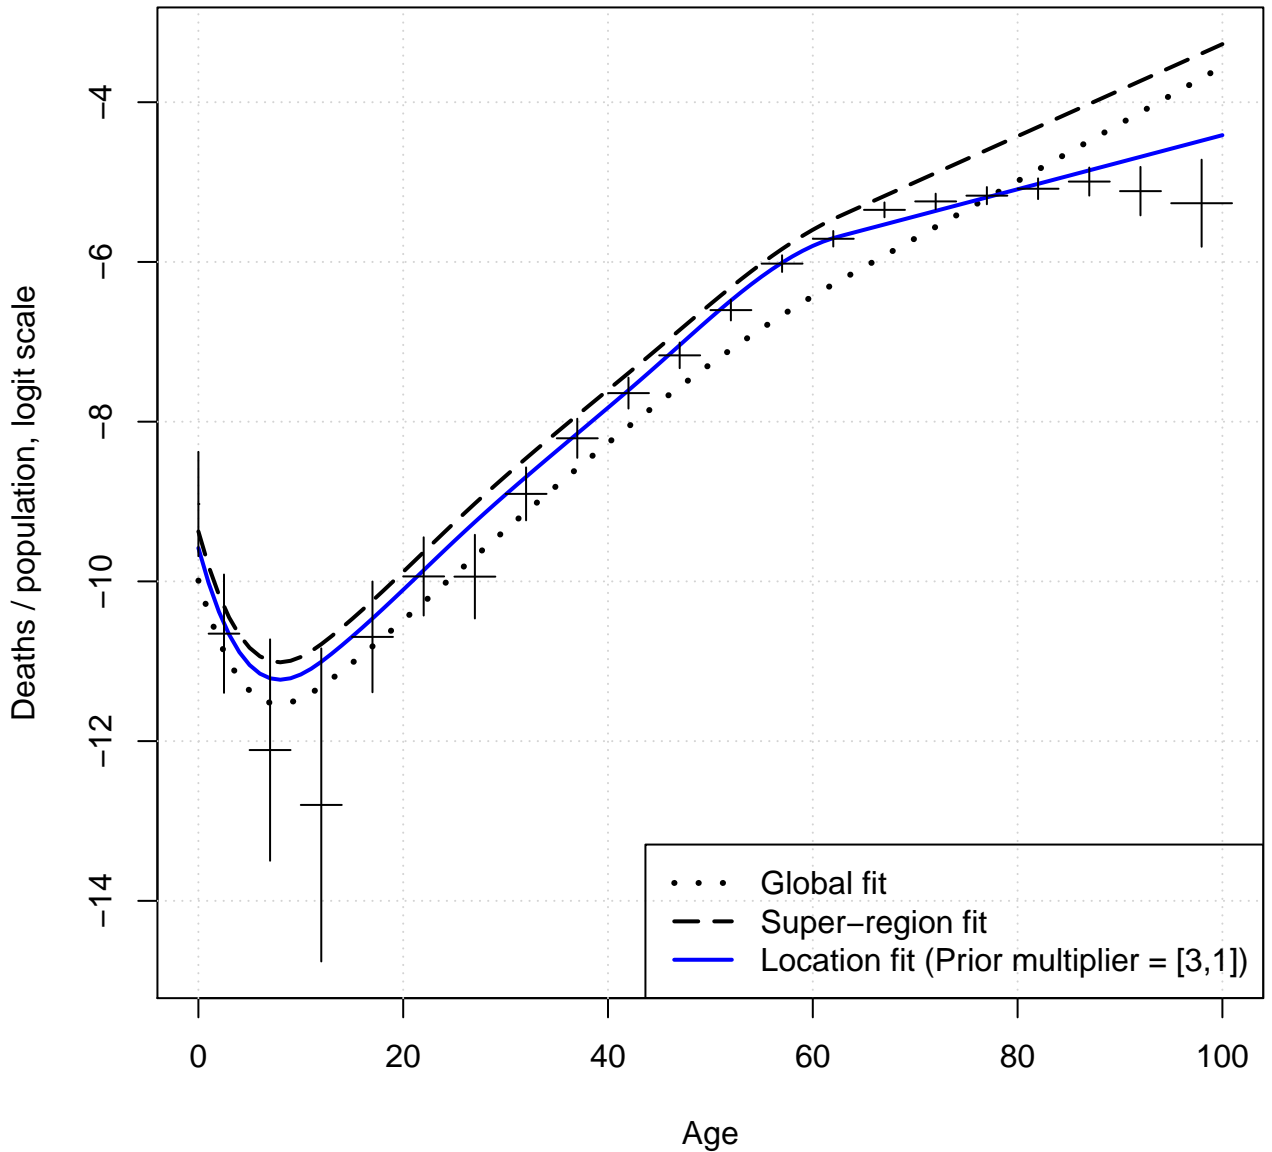

# Hidalgo

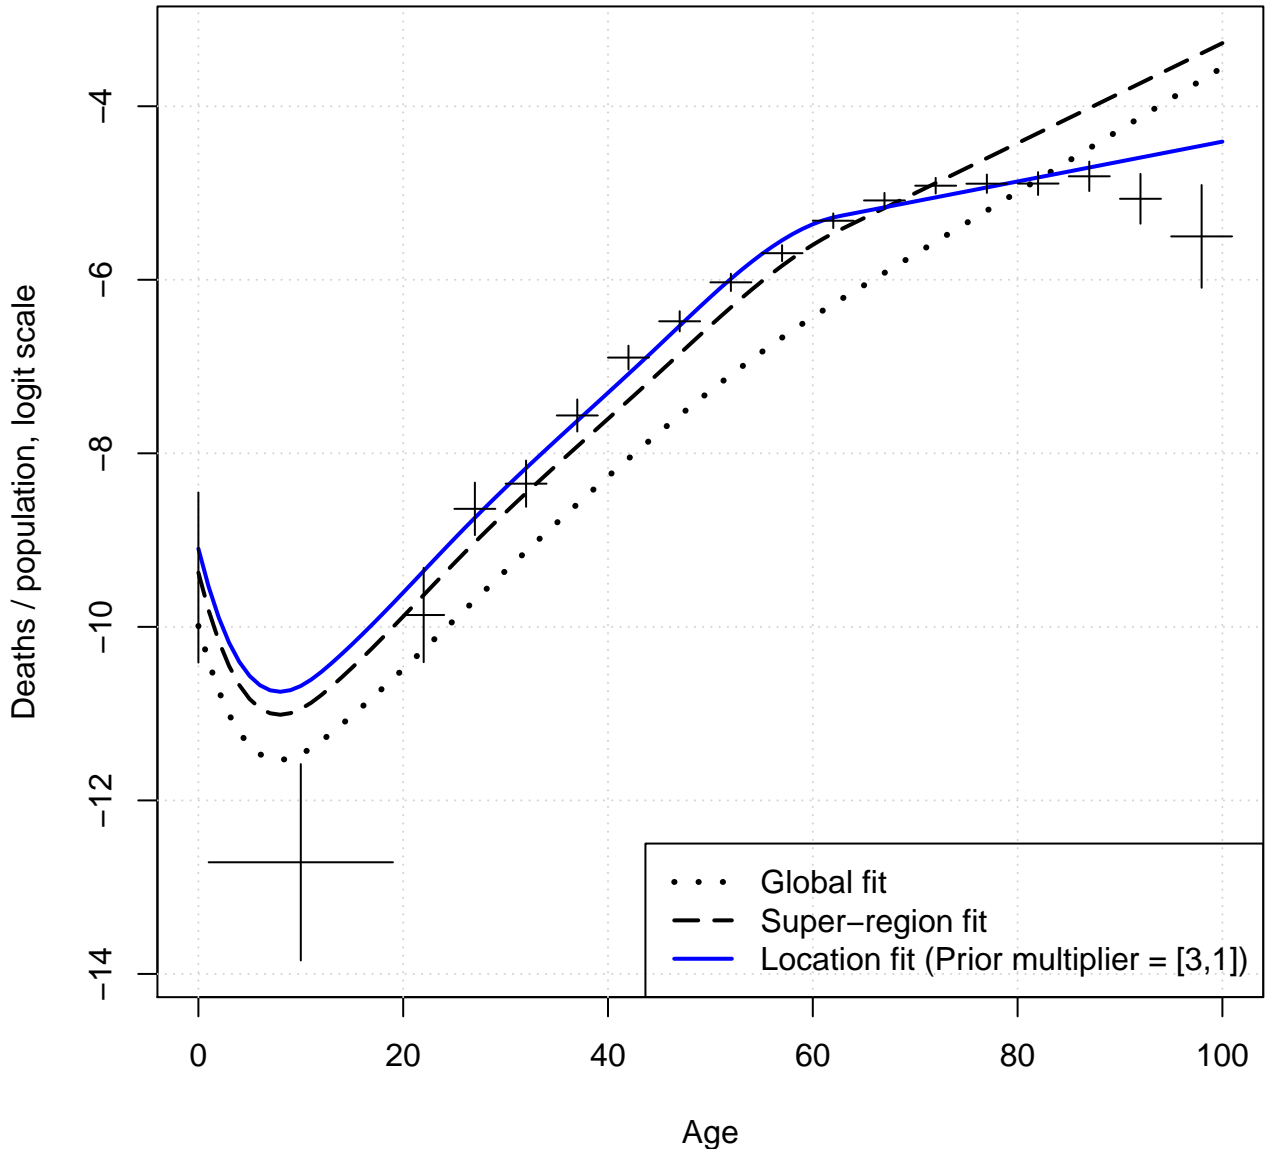

# Jalisco

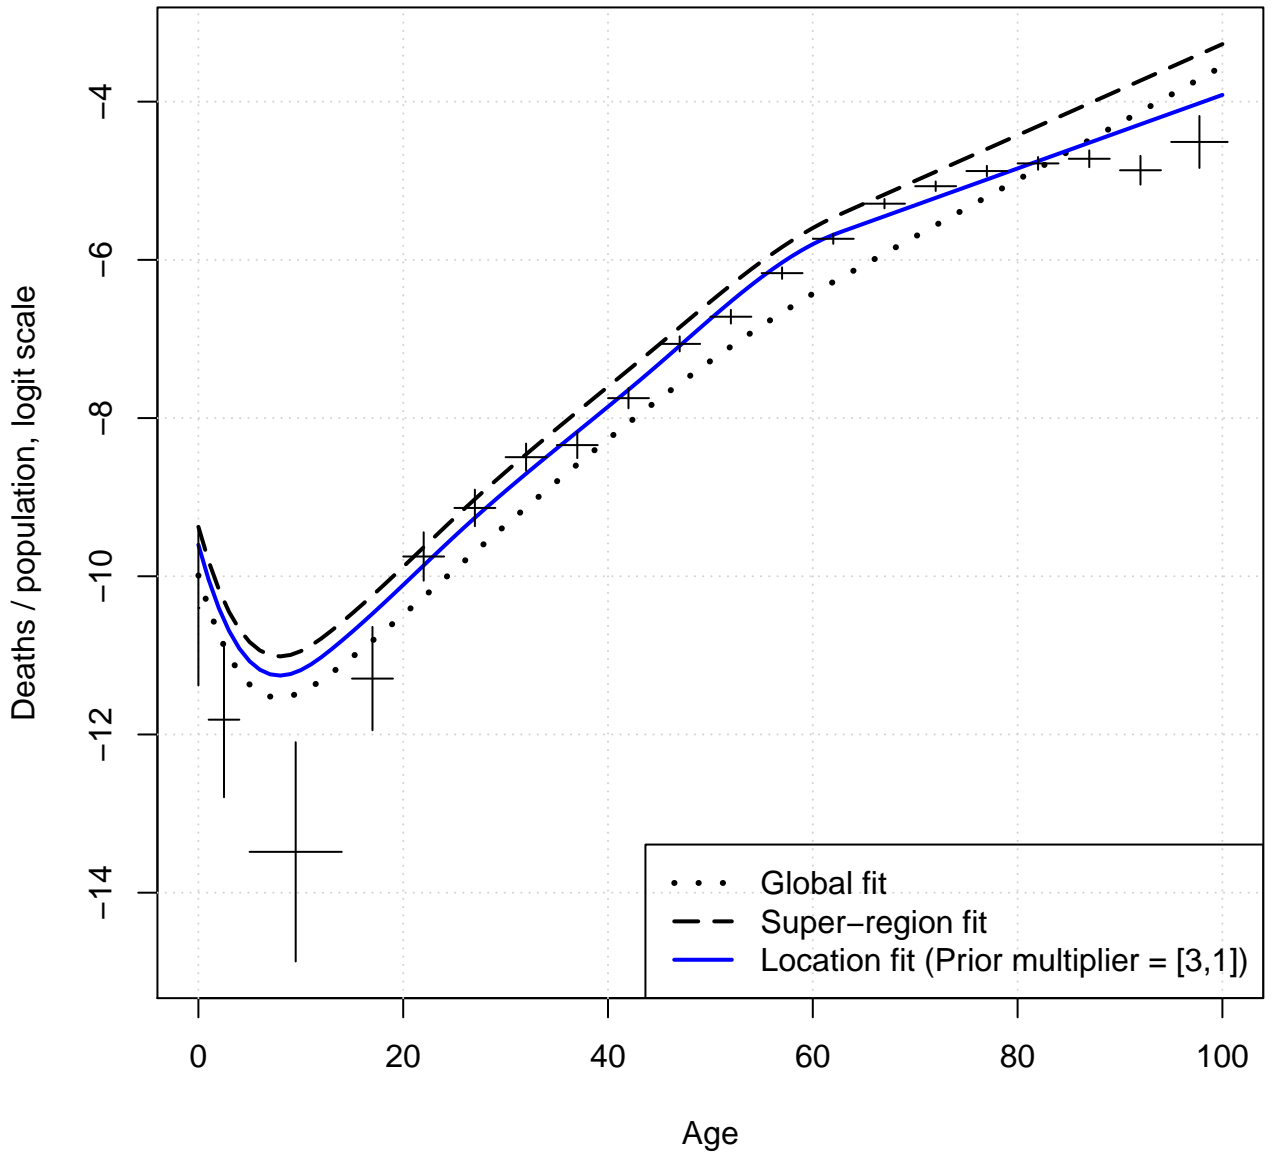

# México

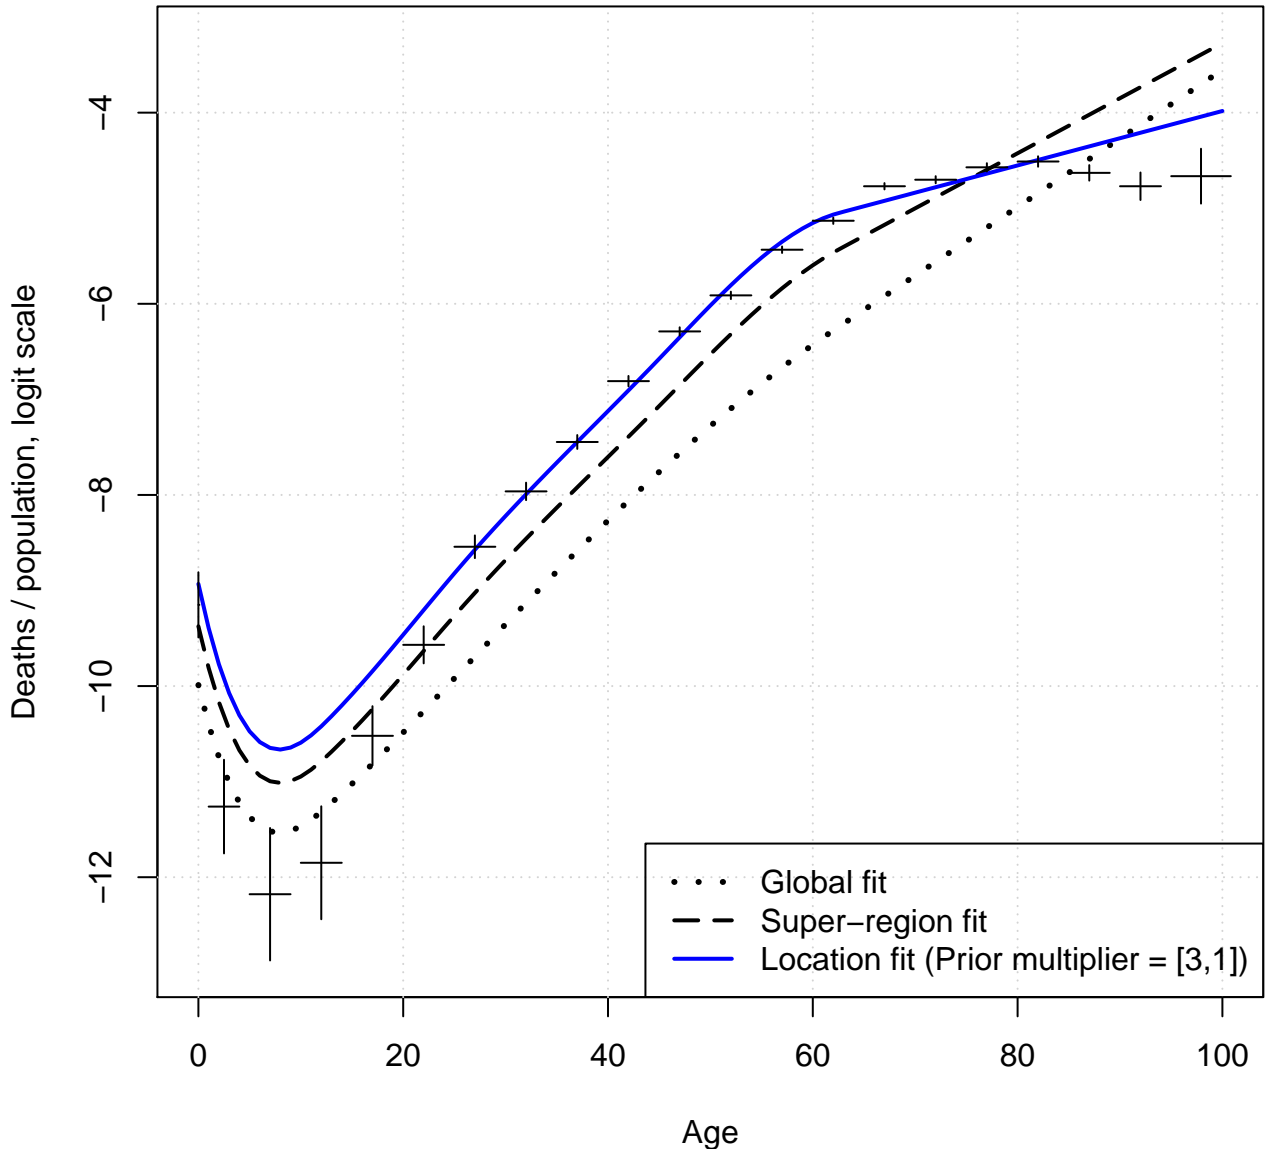

# Michoacán de Ocampo

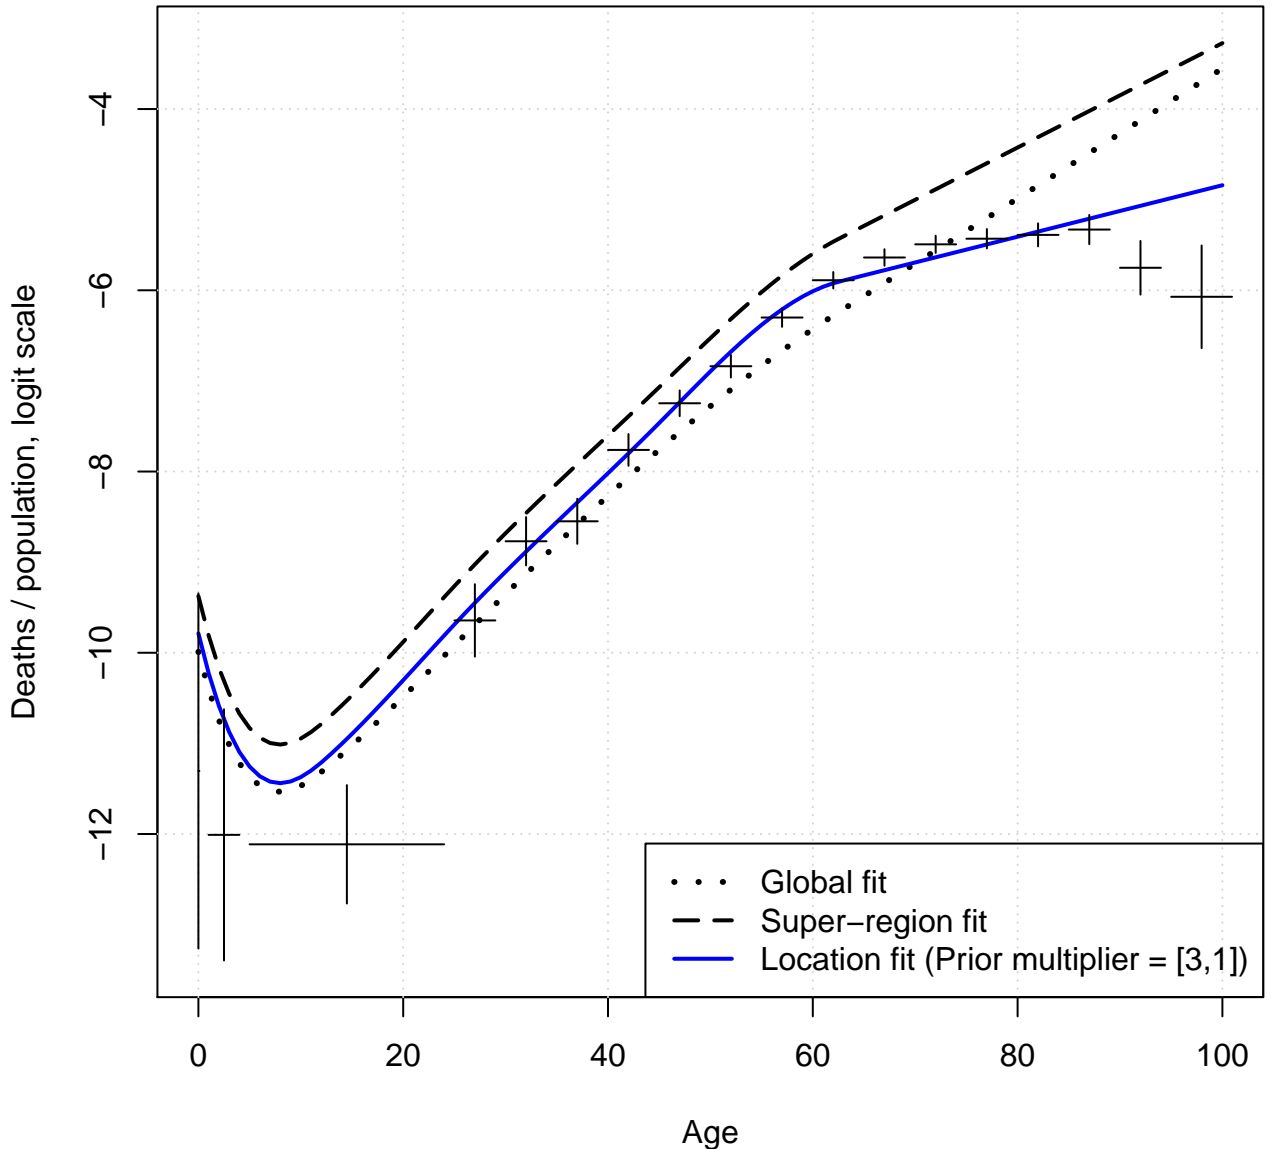

# Morelos

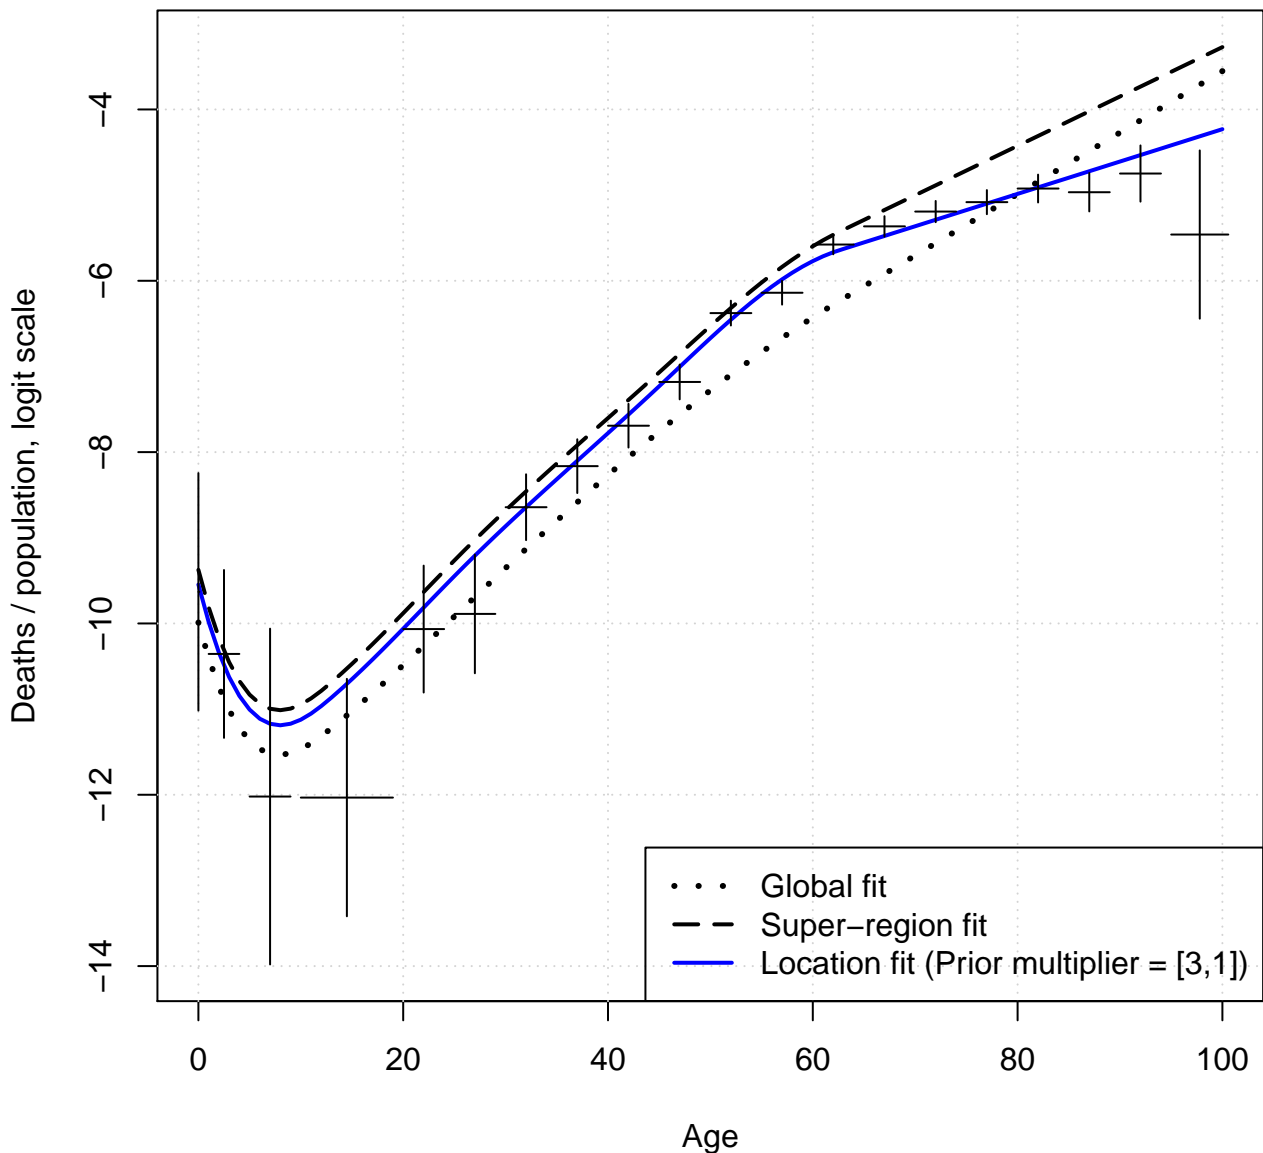

# Nayarit

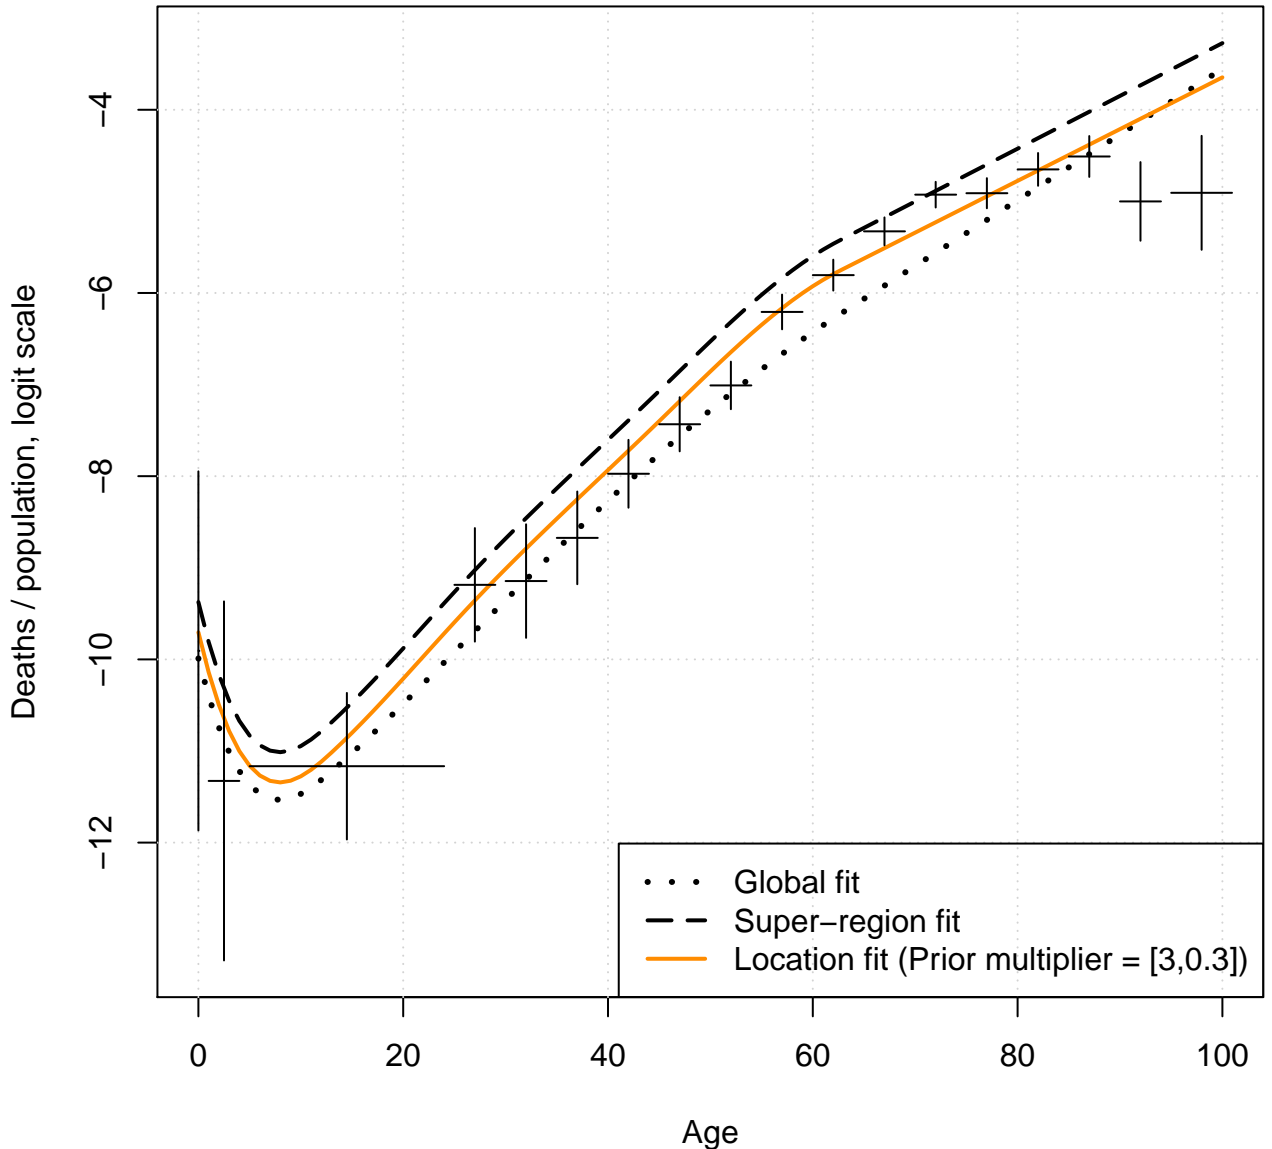

# Nuevo León

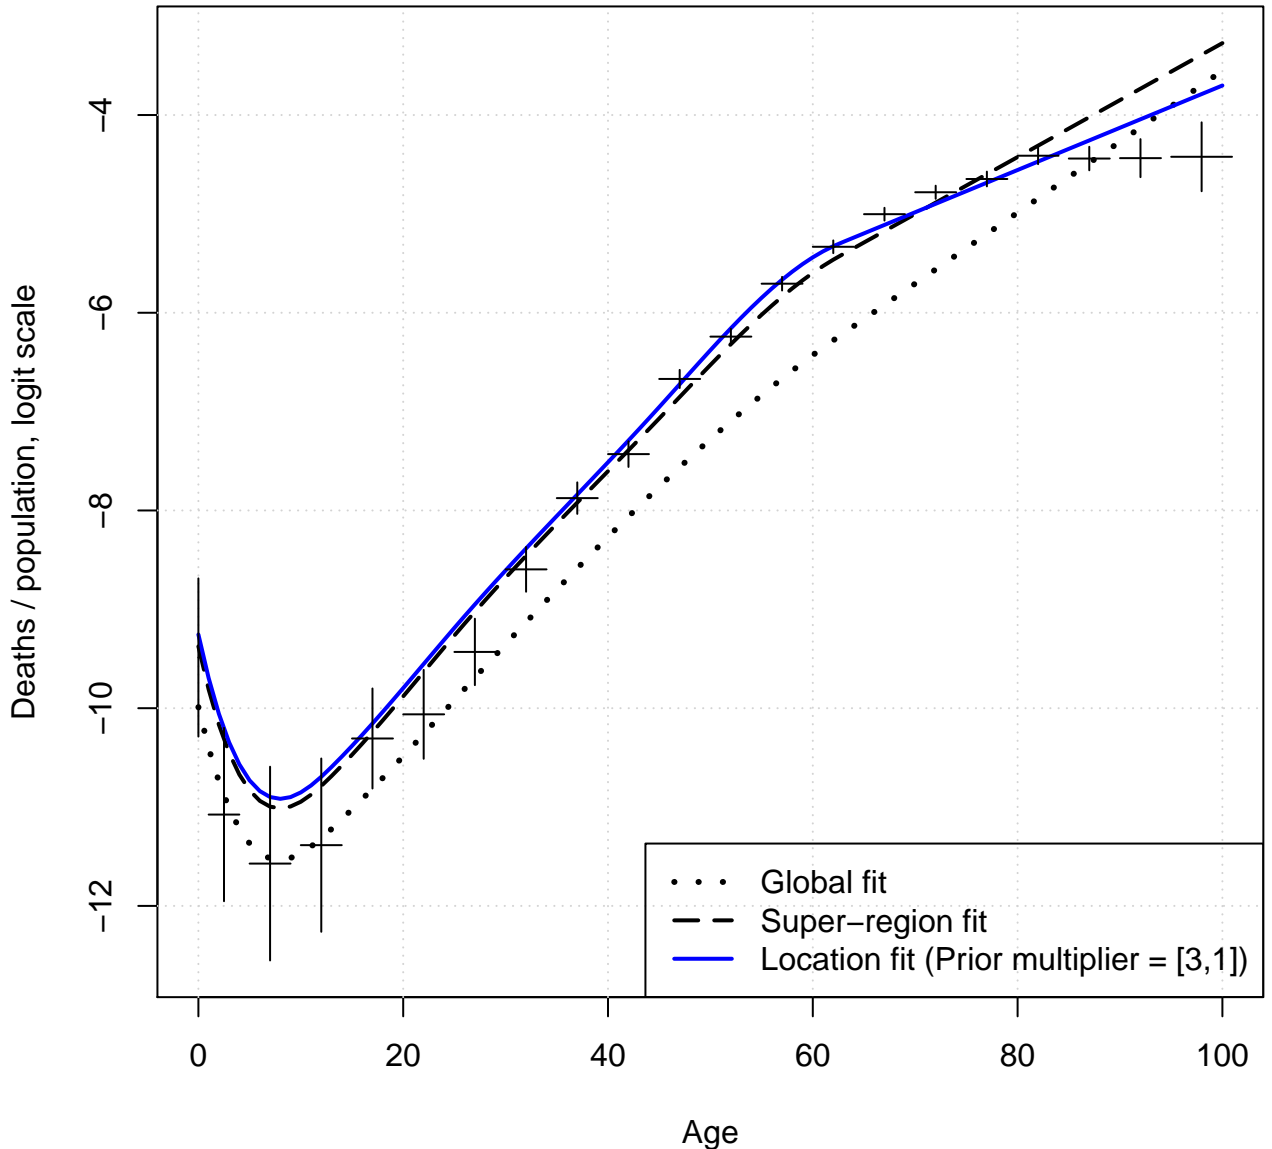



# Oaxaca

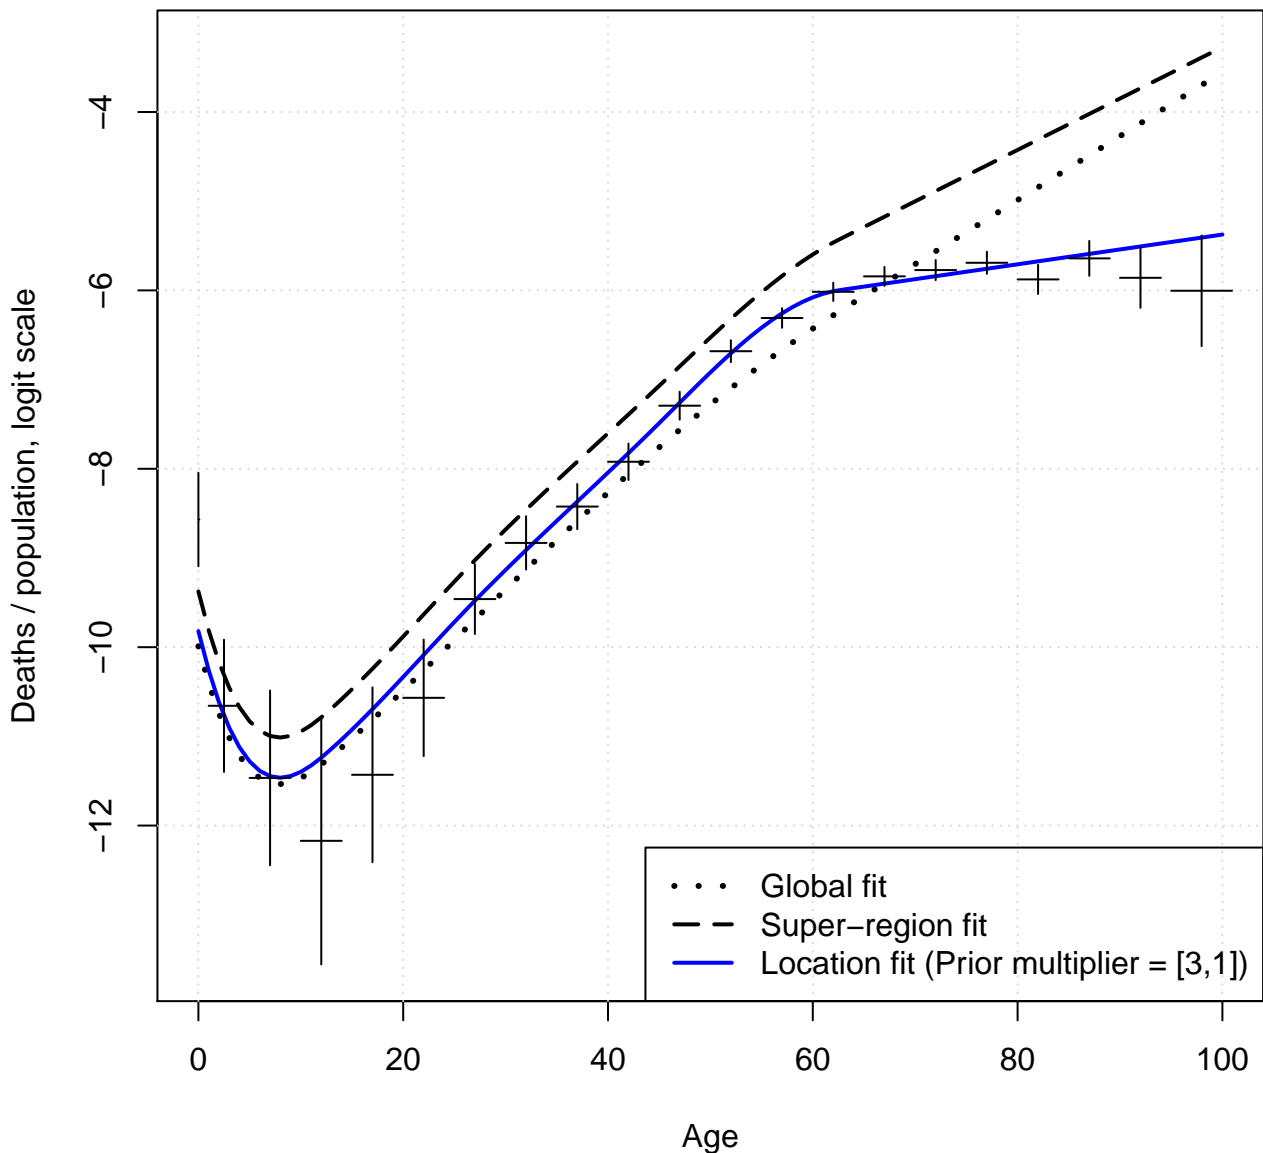

# Puebla

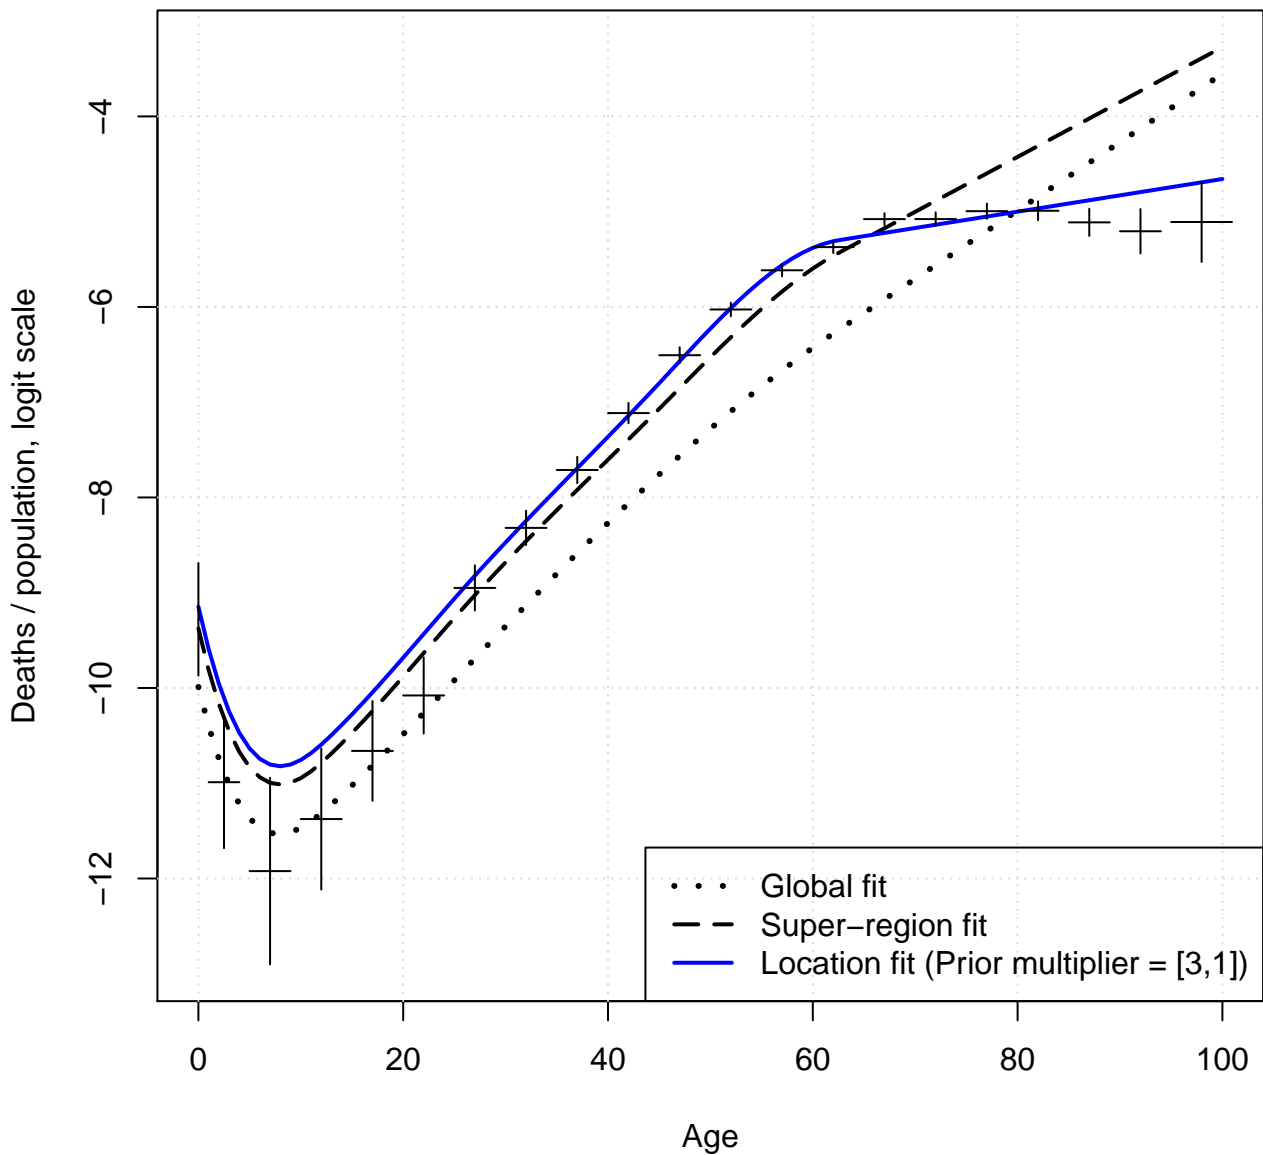

# Querétaro

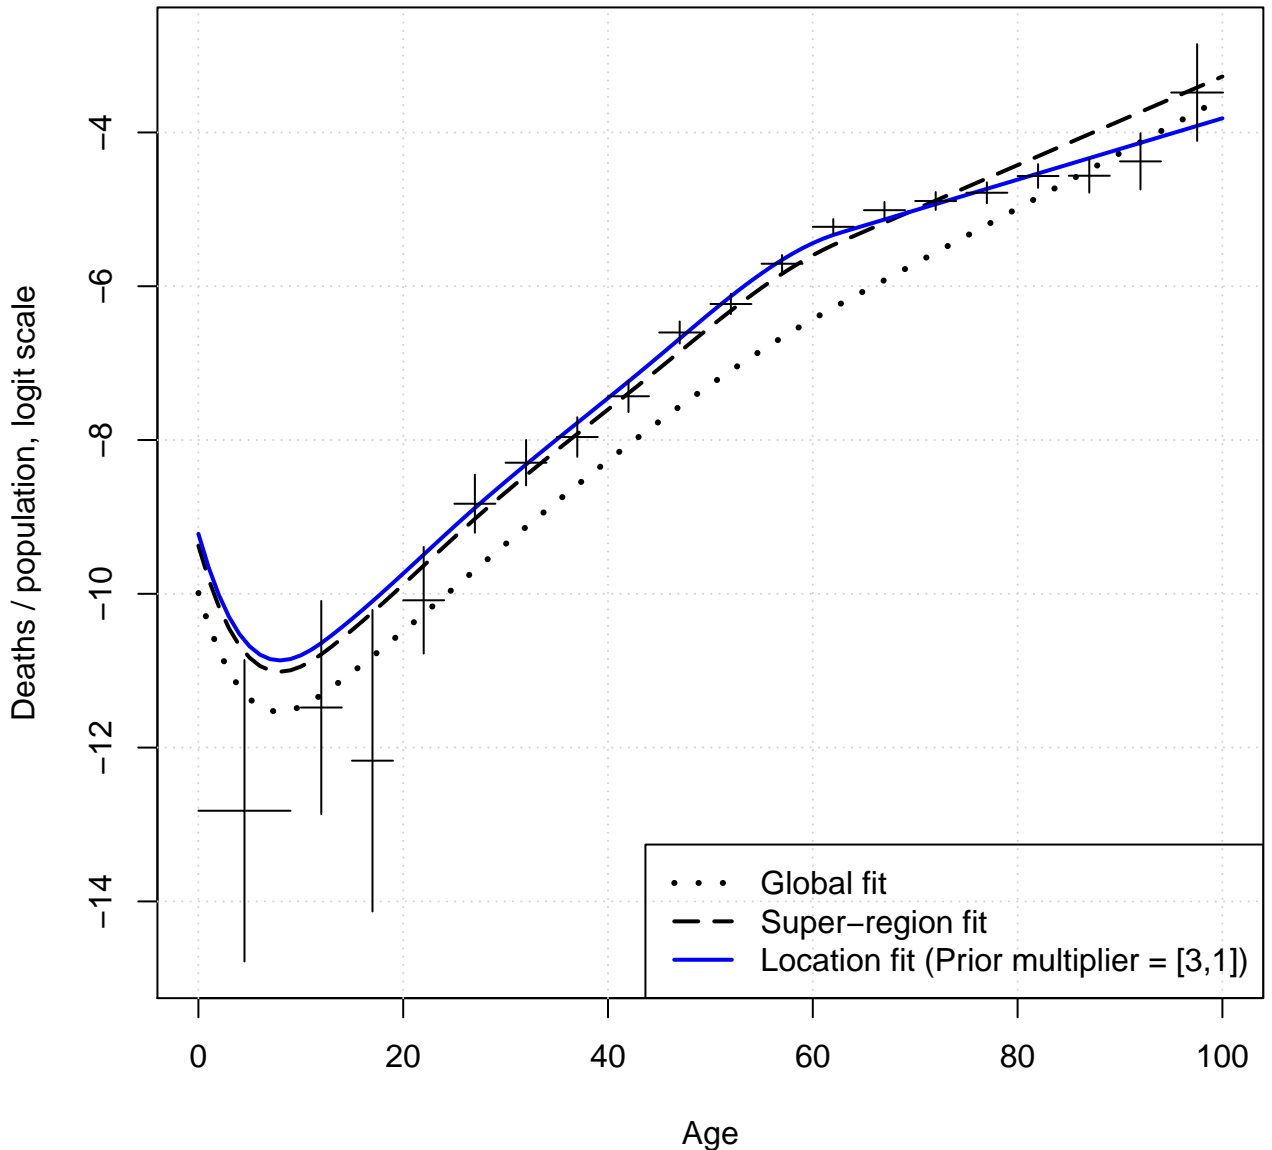

# Quintana Roo

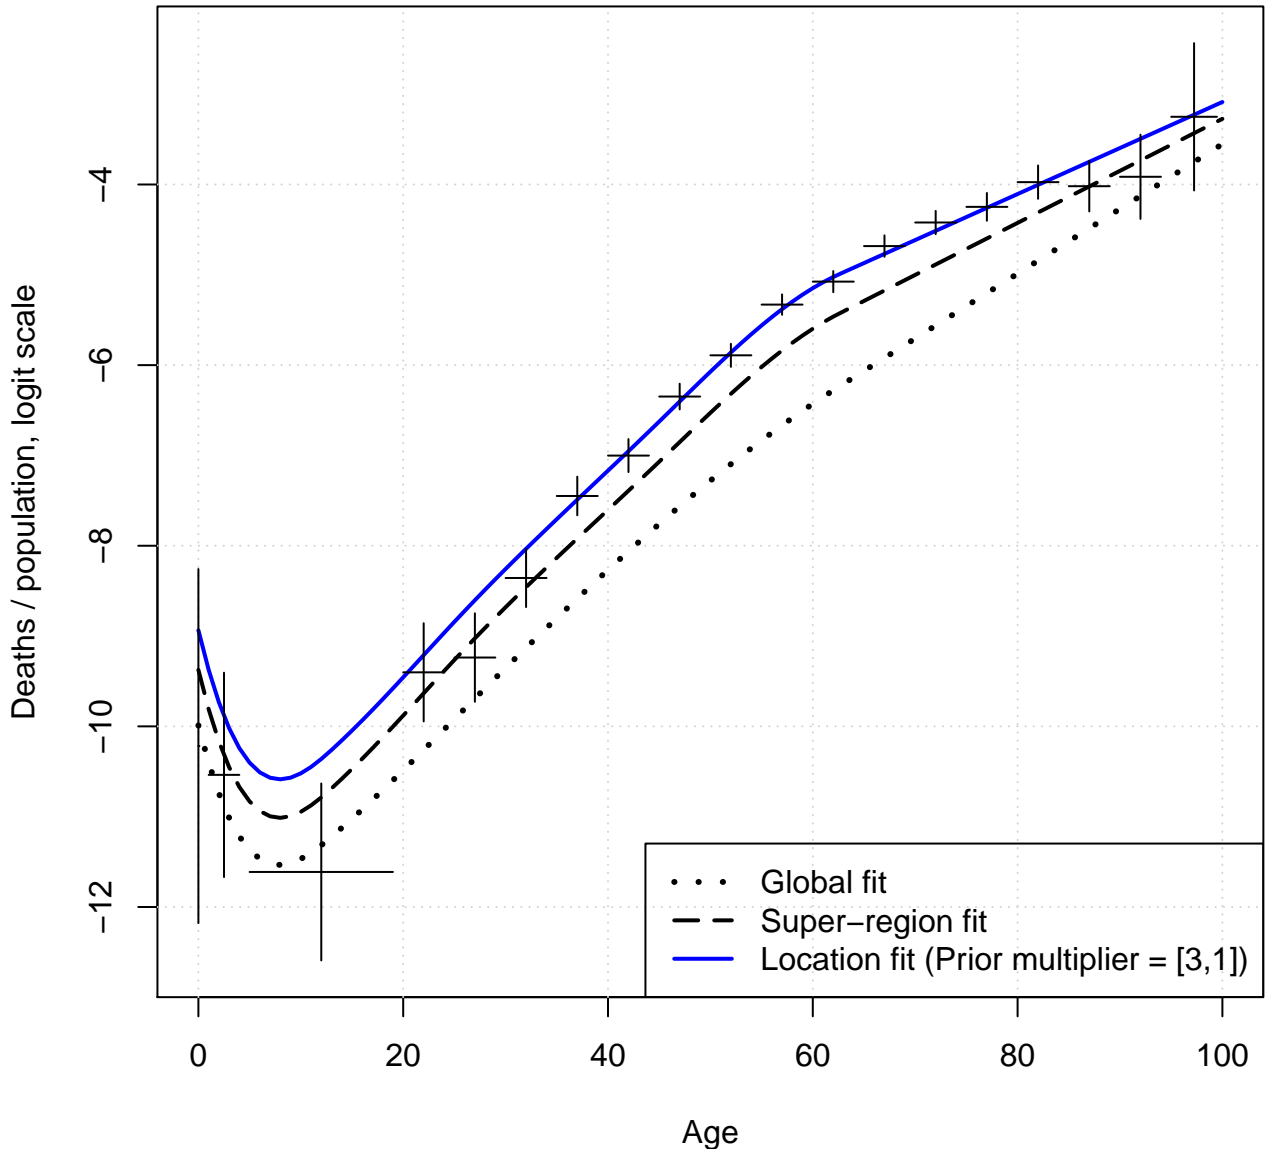

# San Luis Potosí

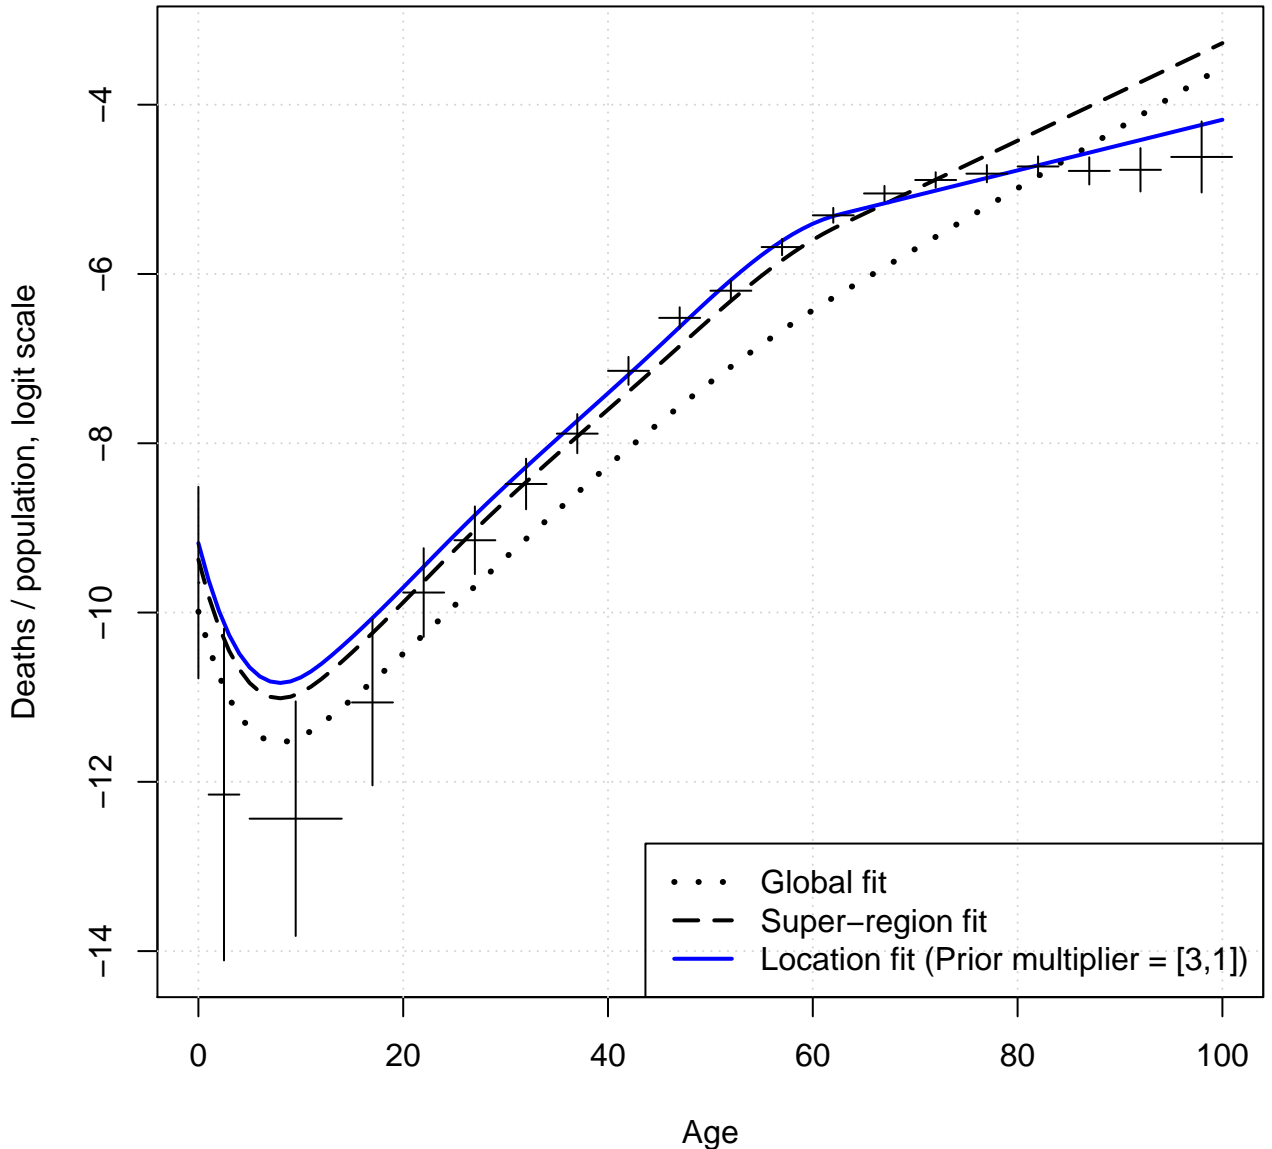

# Sinaloa

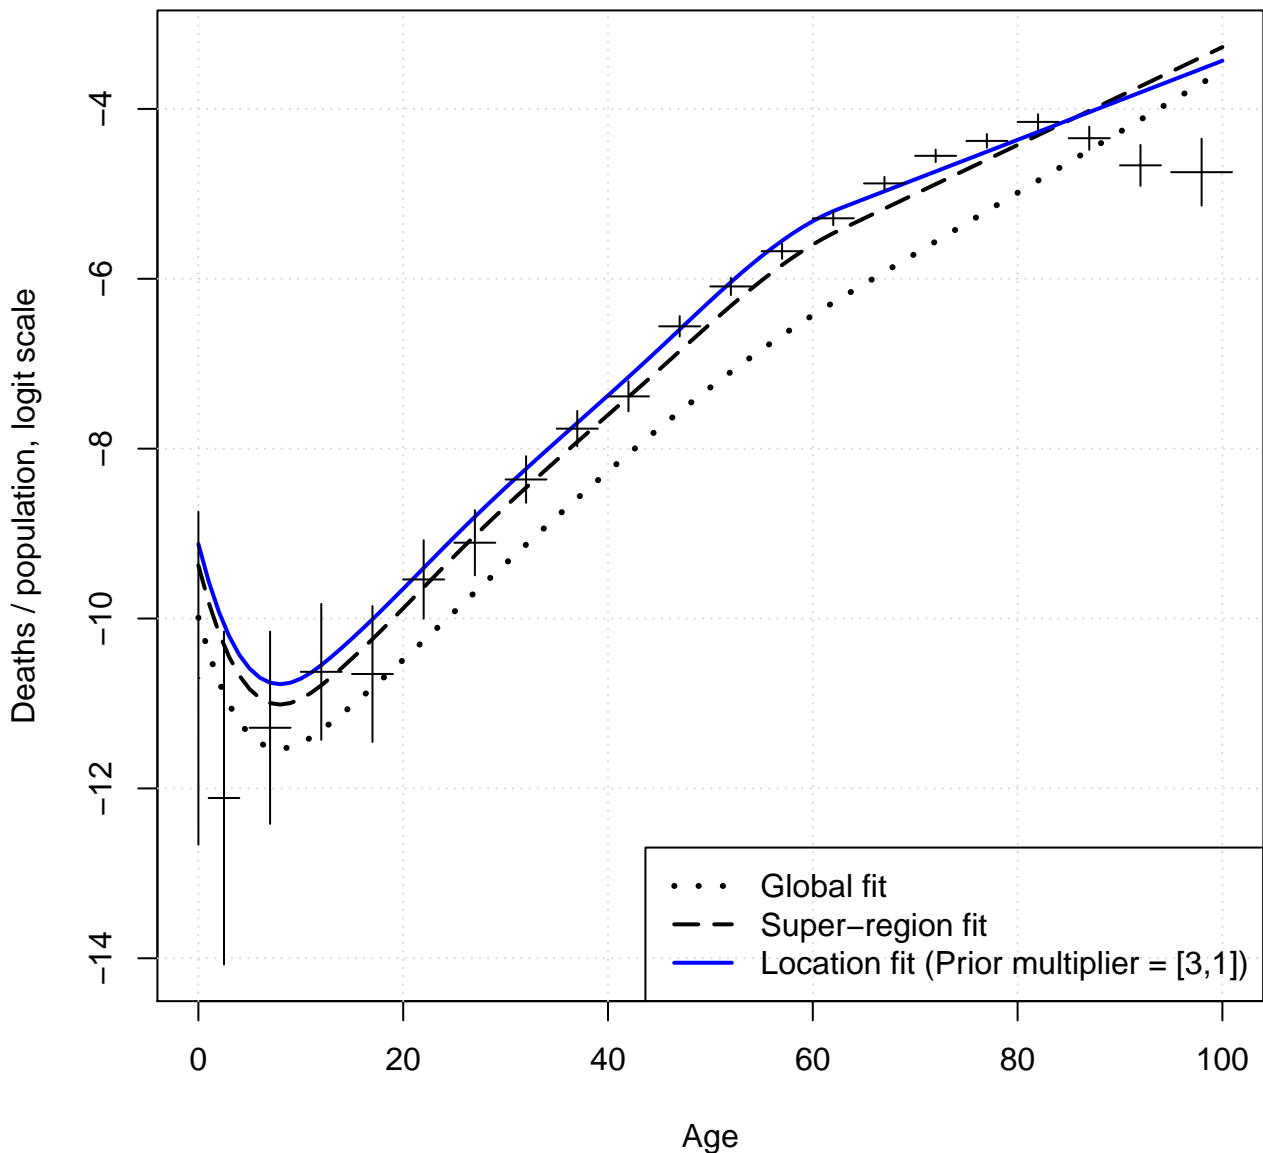

# Sonora

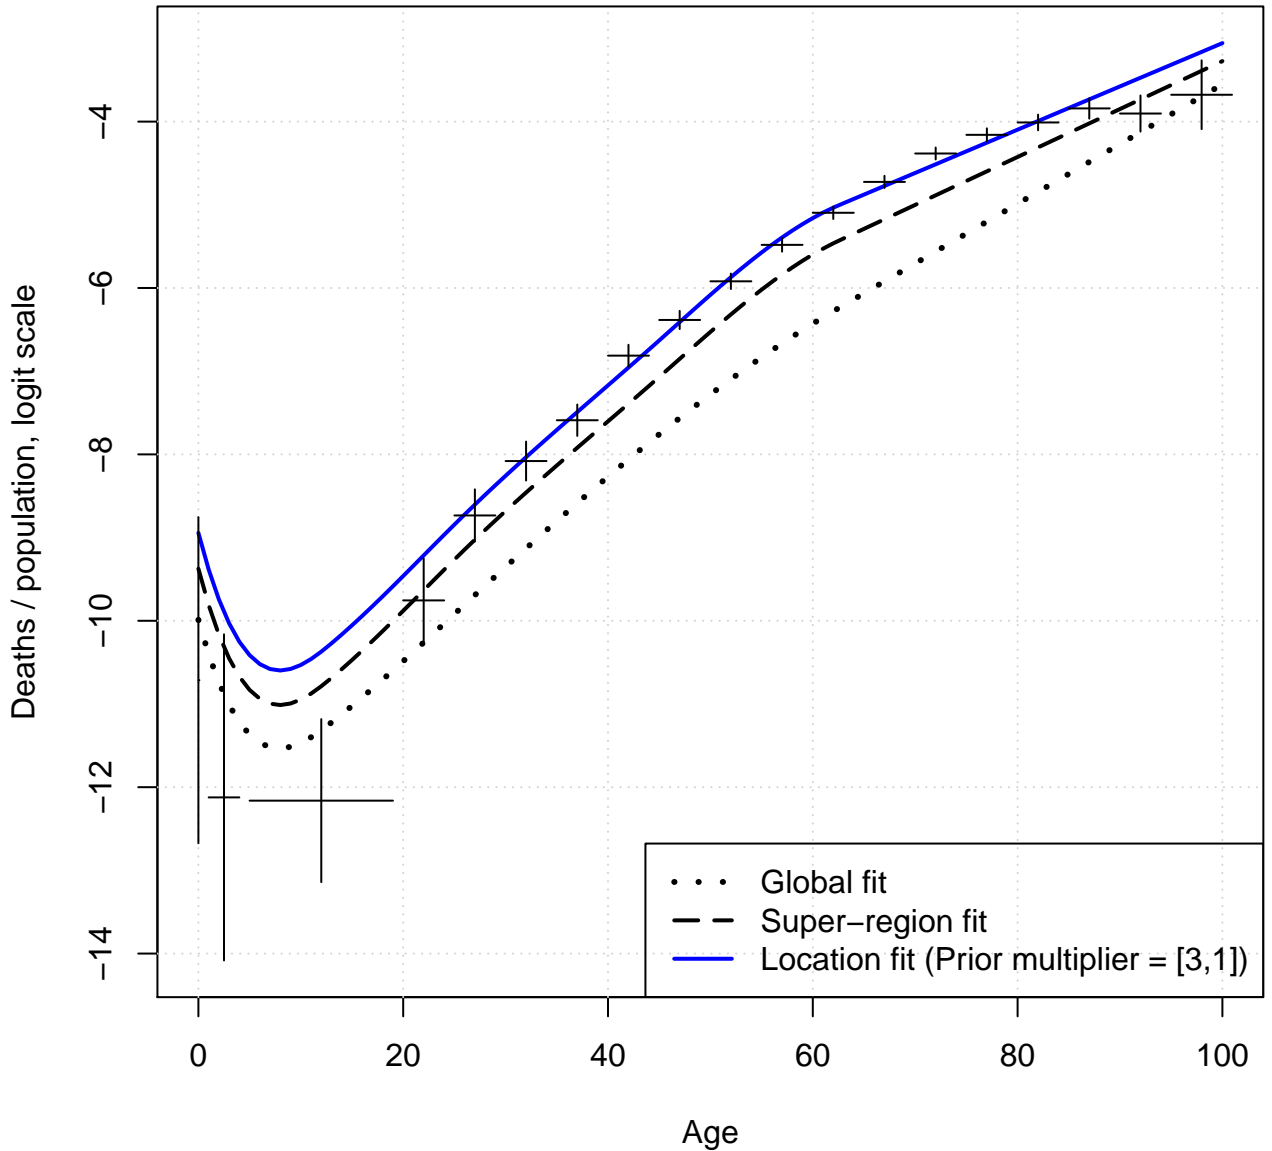

# Tabasco

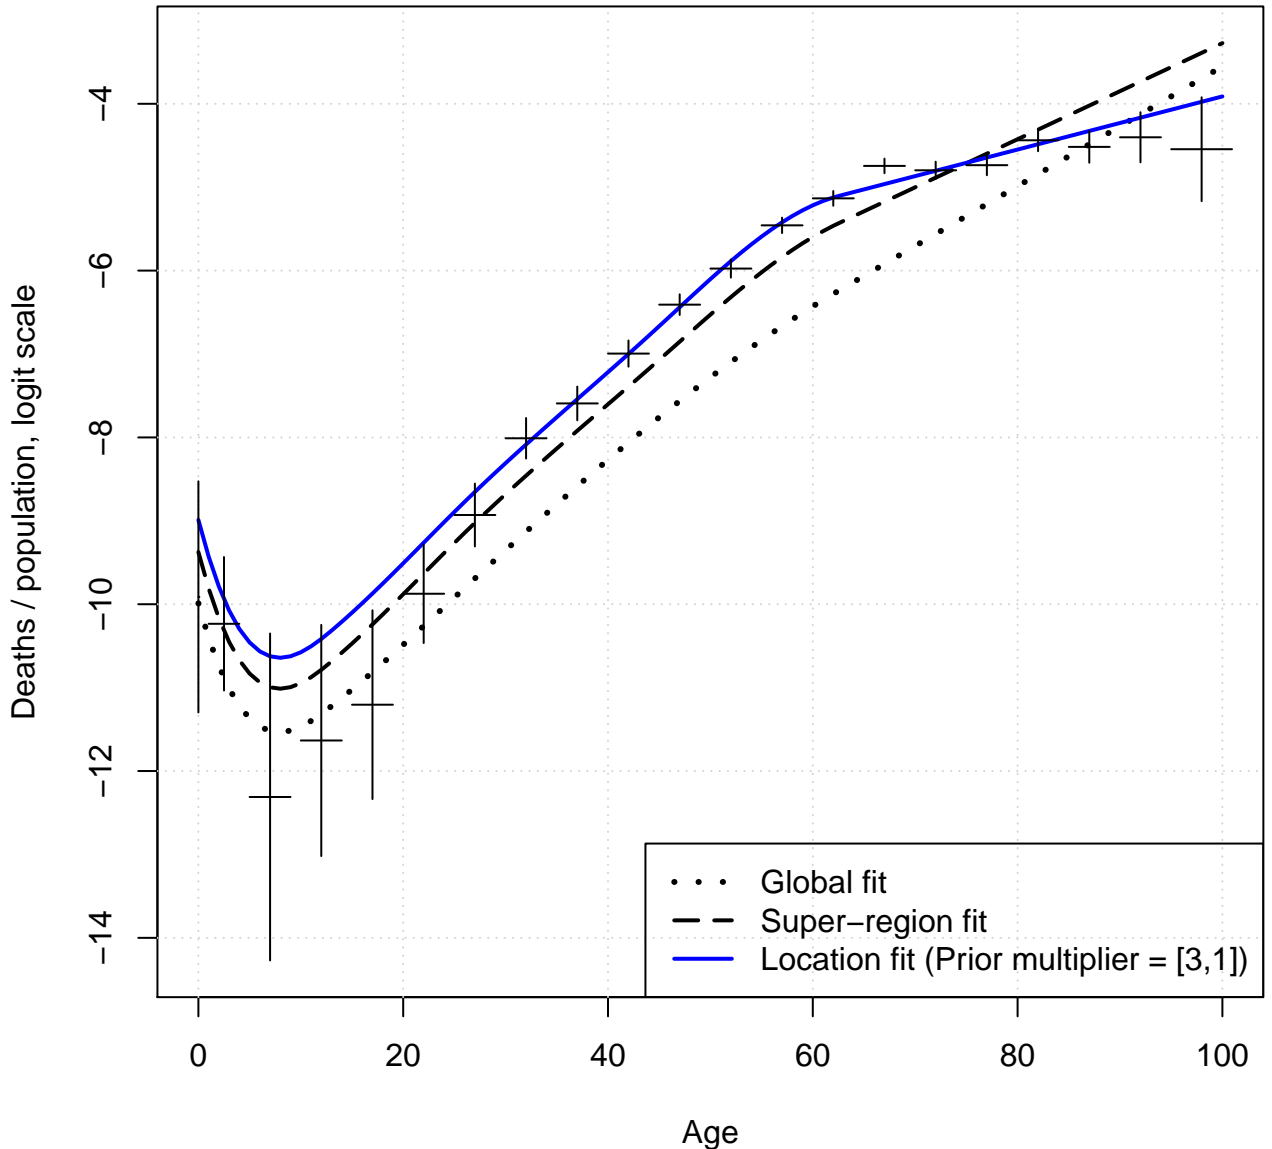



# Tamaulipas

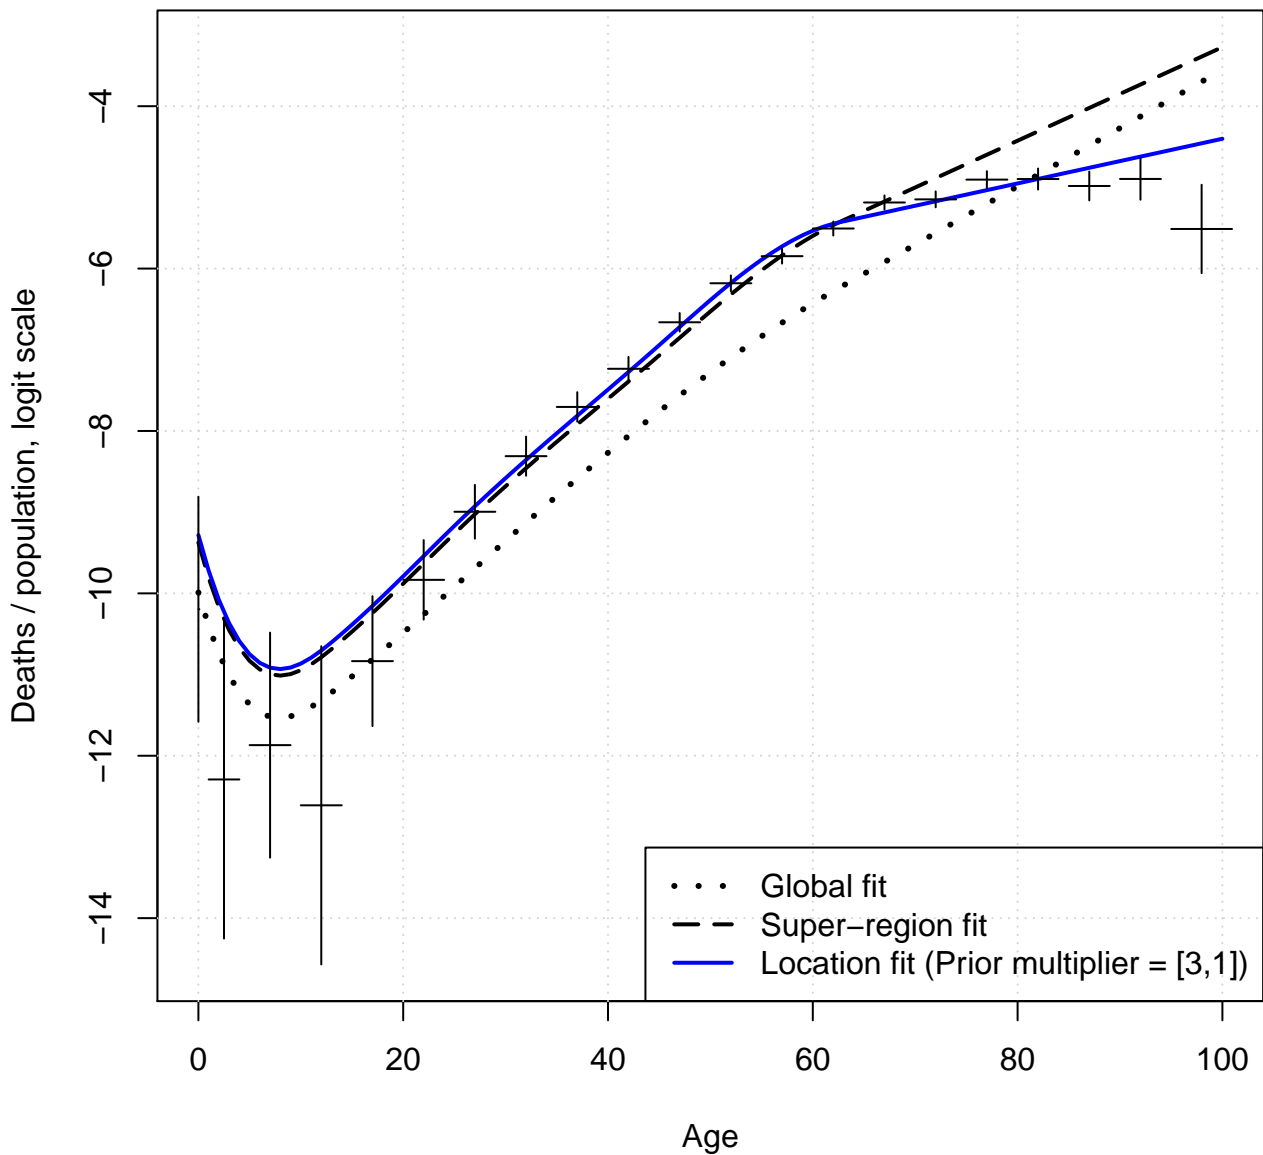

# Tlaxcala

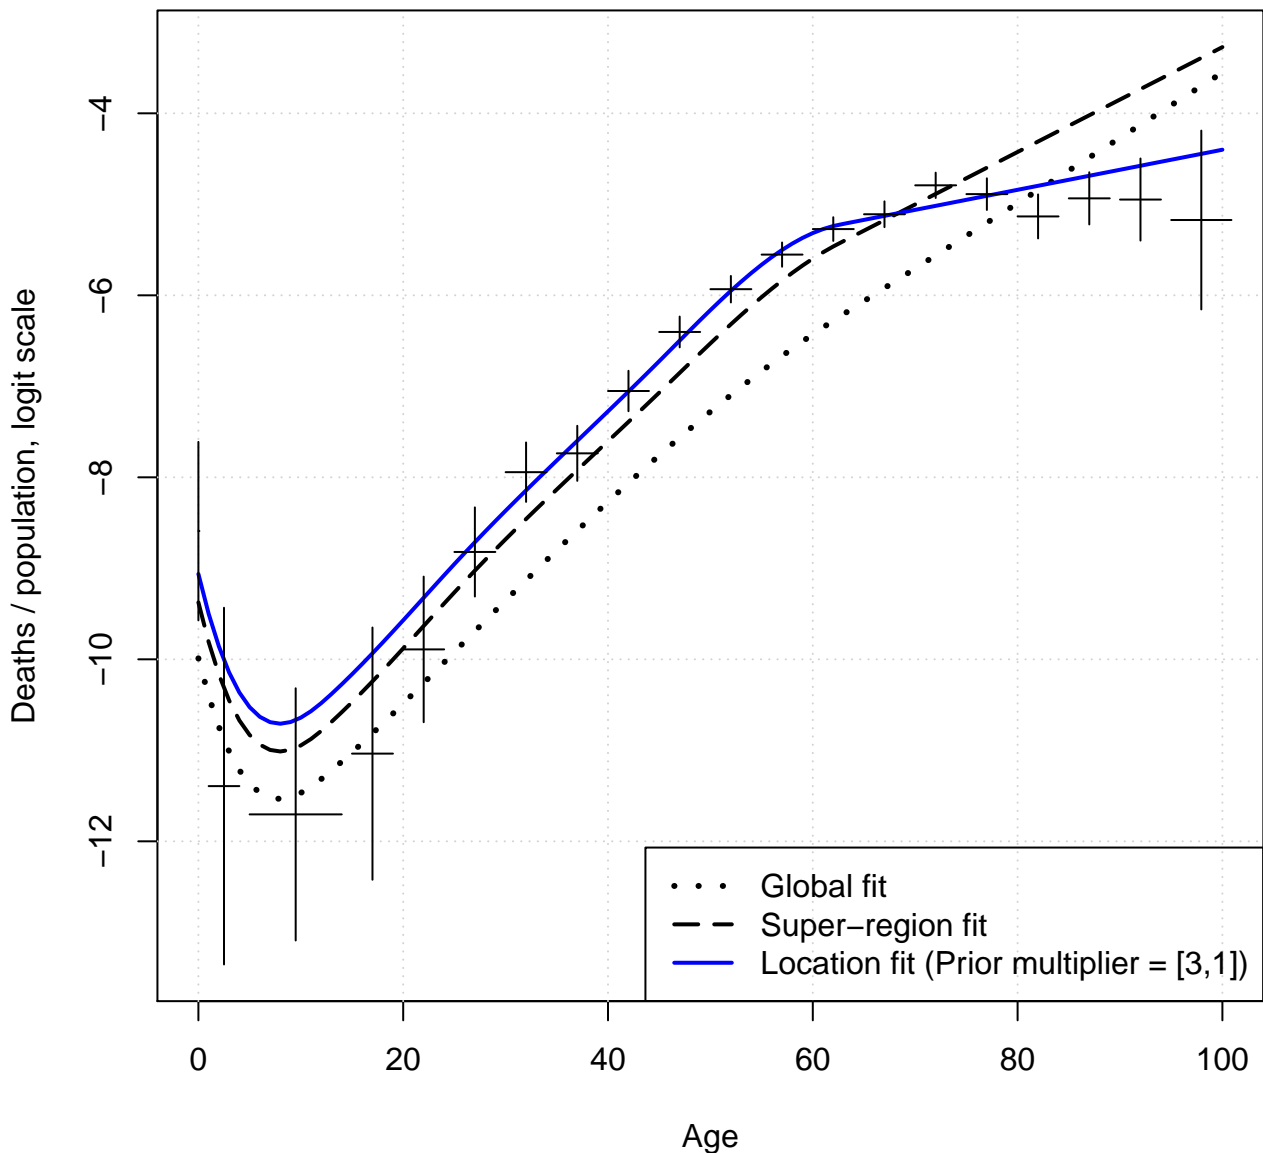

# Veracruz de Ignacio de la Llave

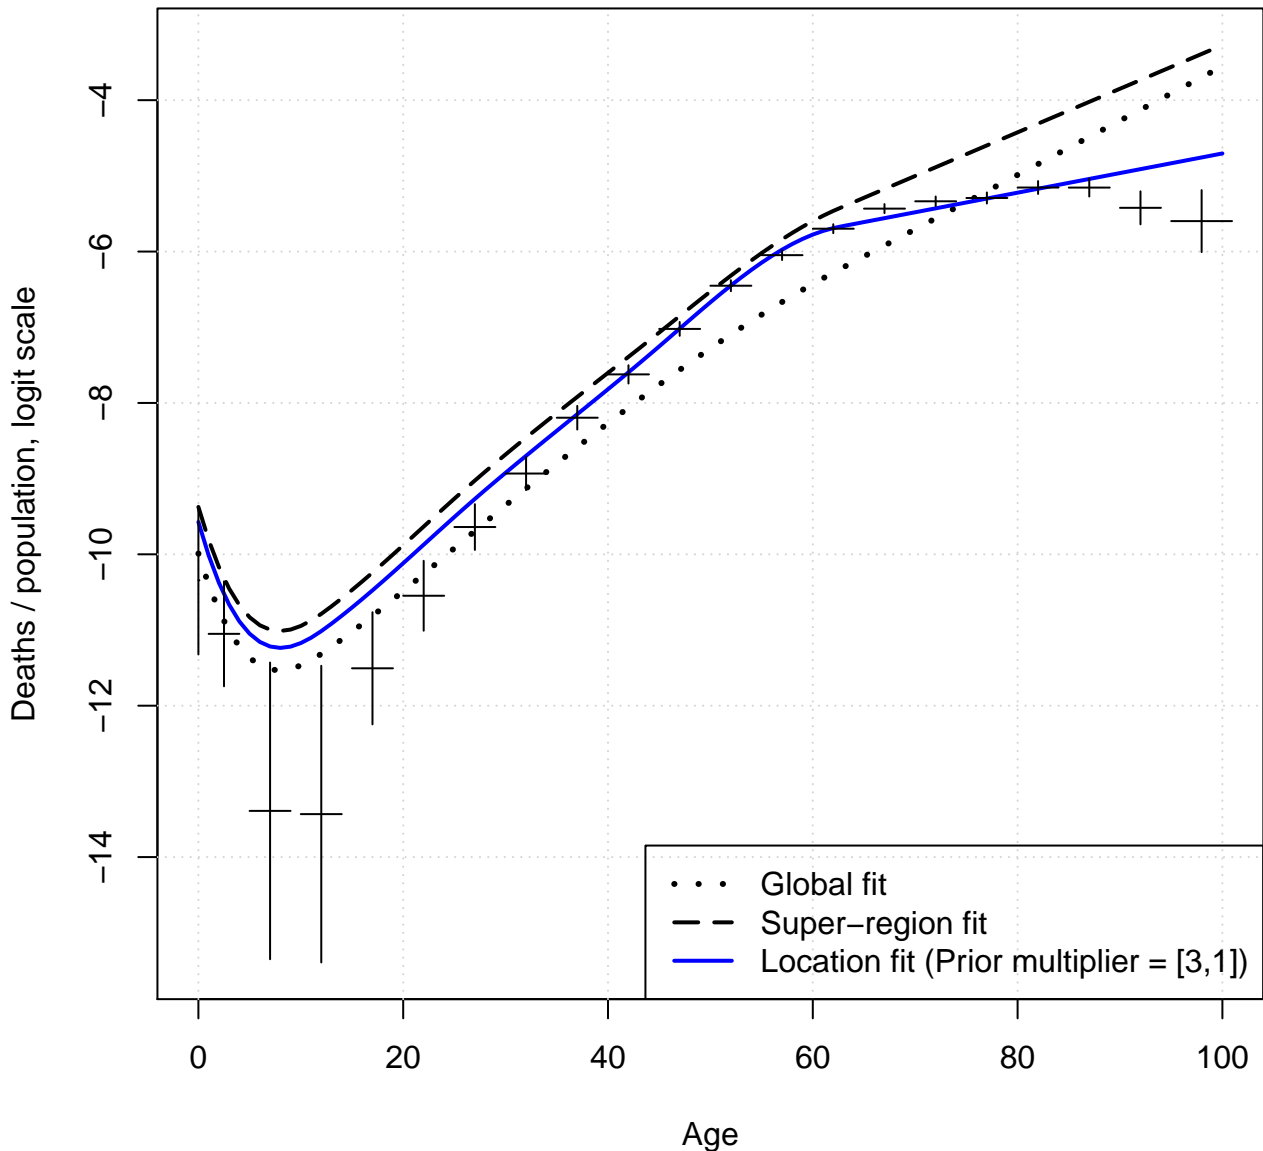

# Yucatán

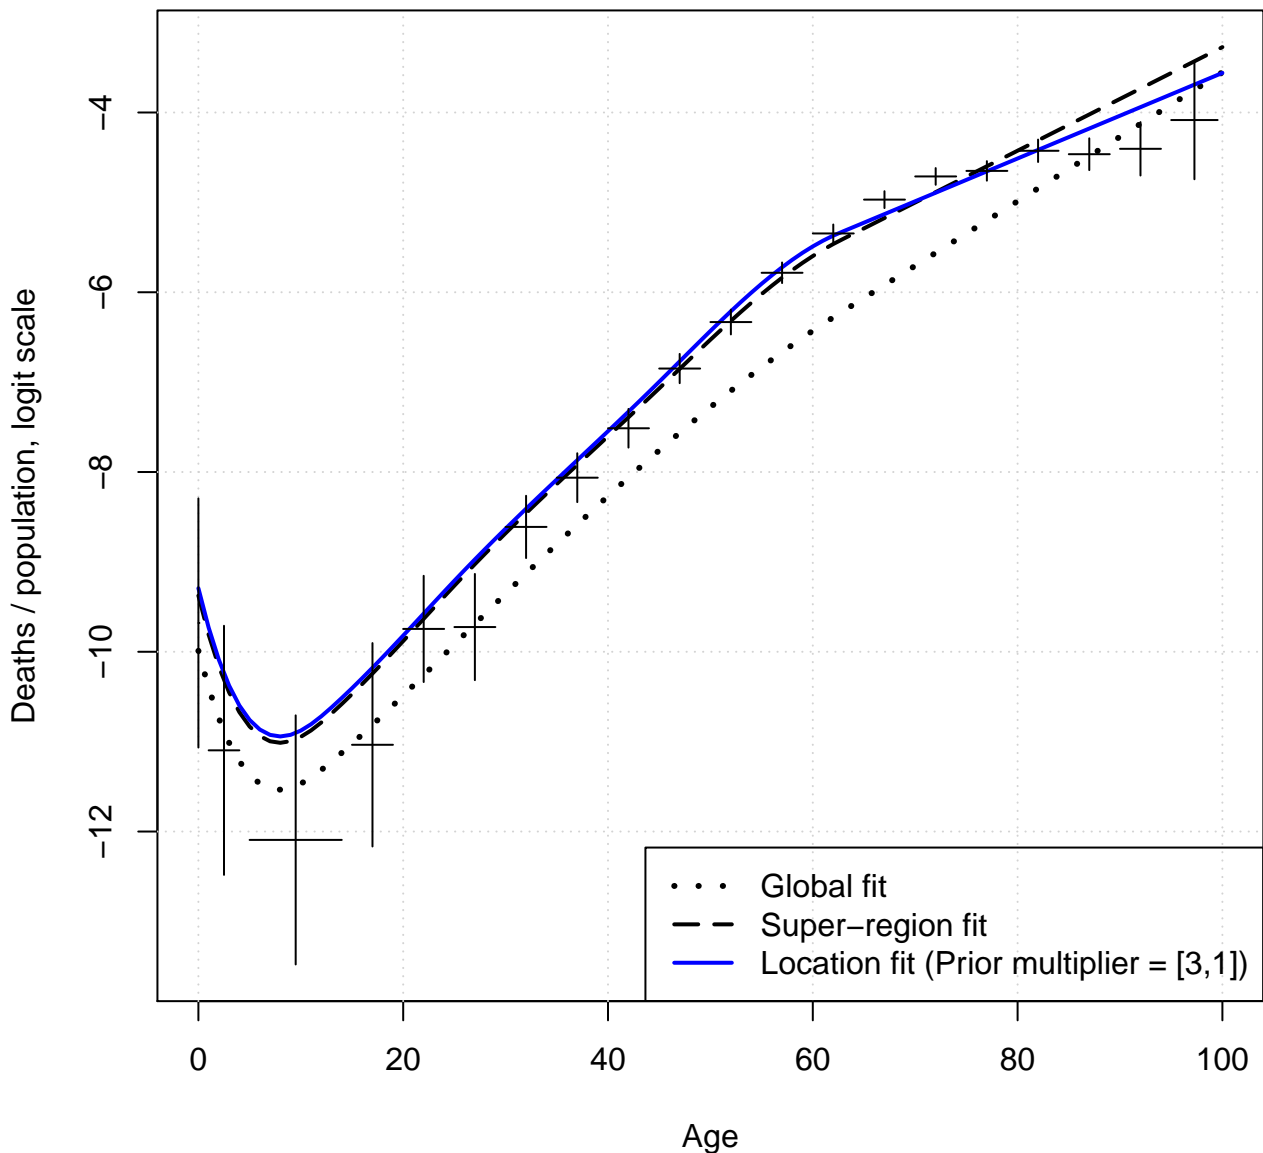

# Zacatecas

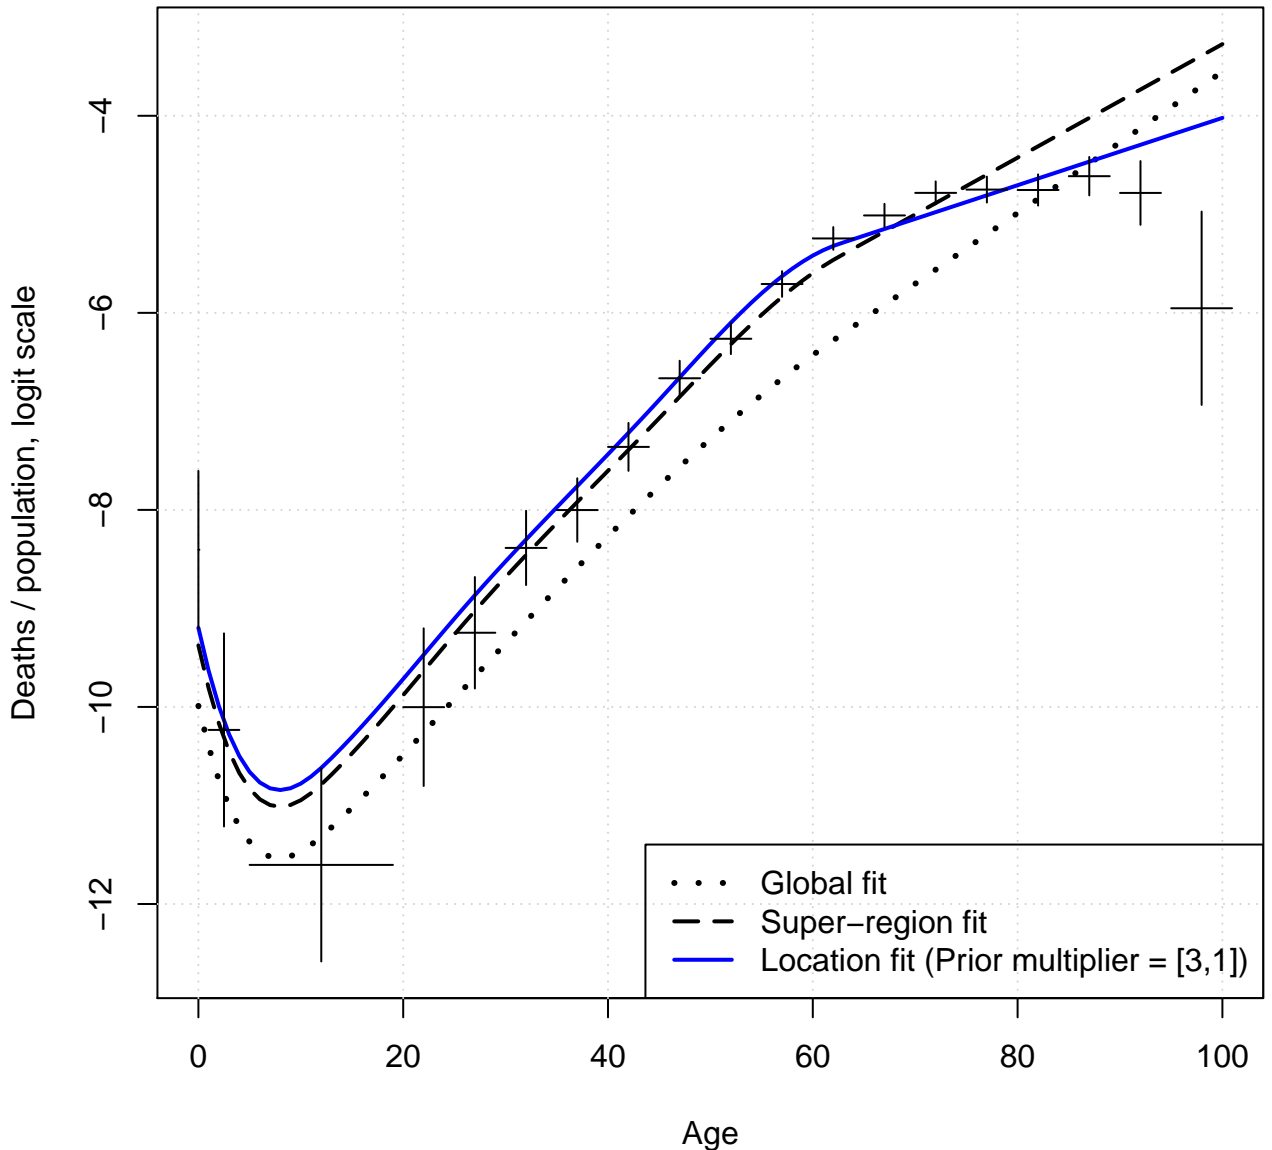

## Aceh

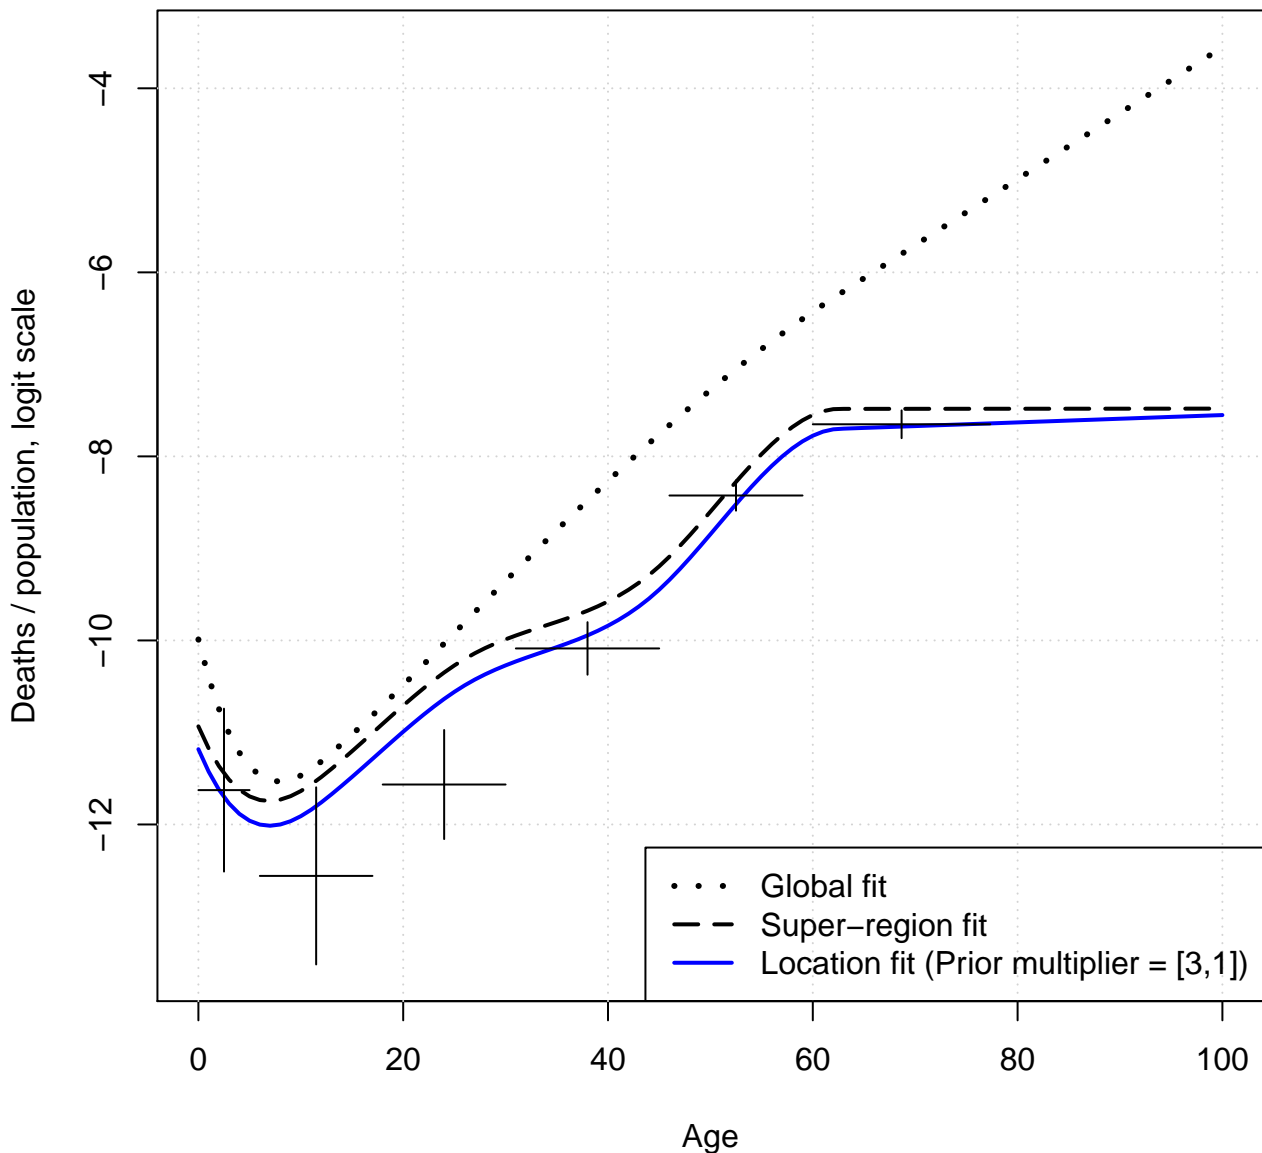

# North Sumatra

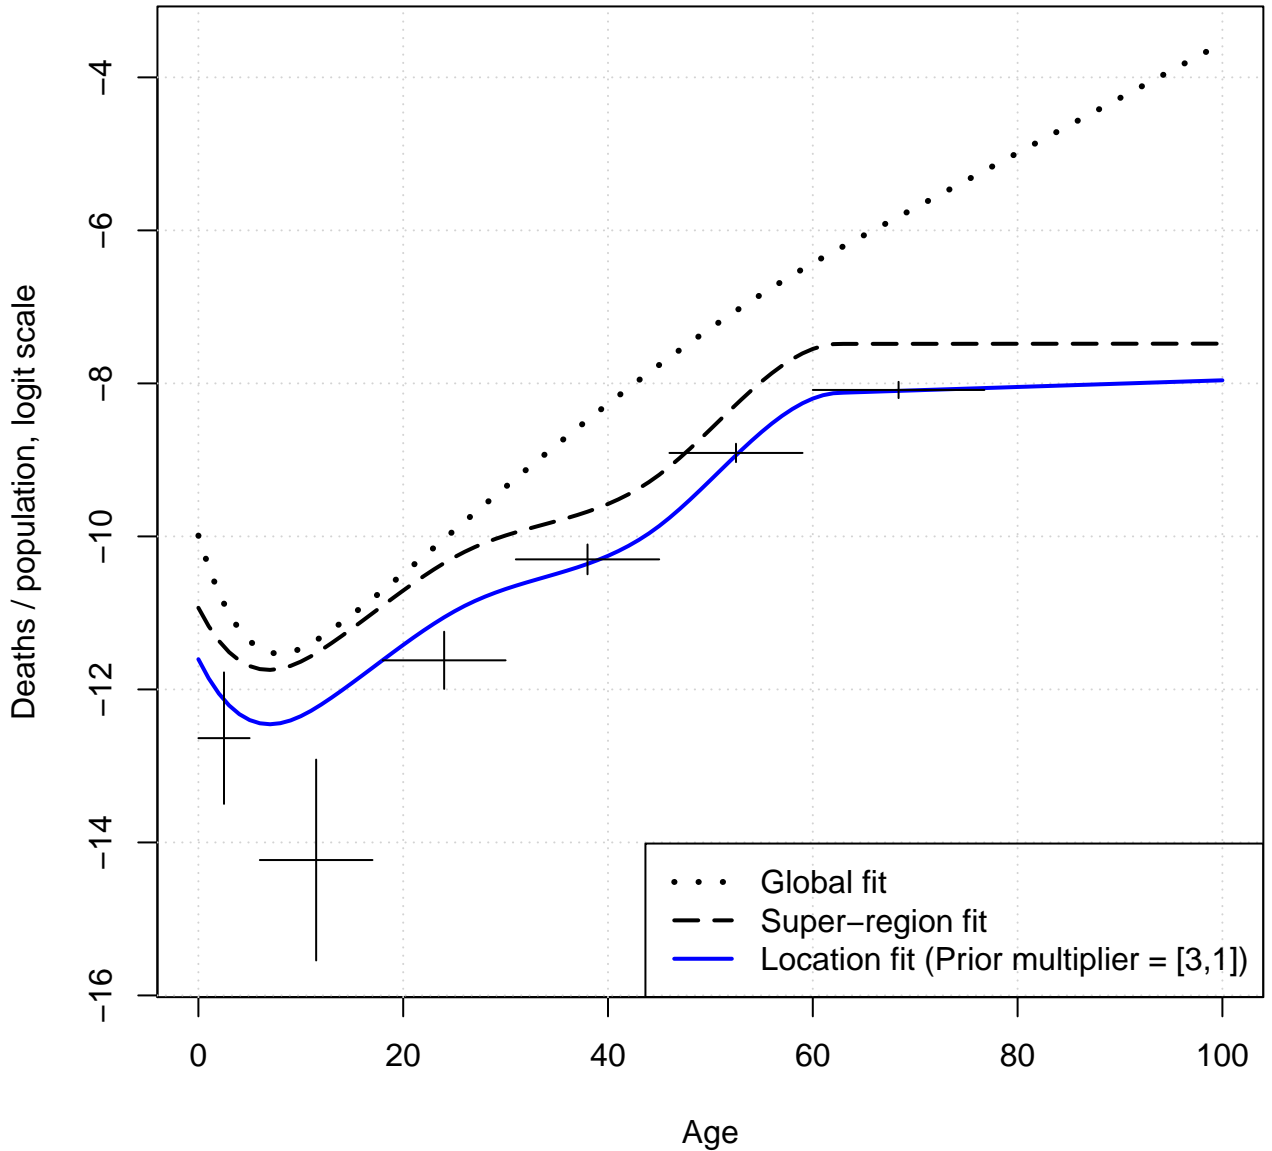

# West Sumatra

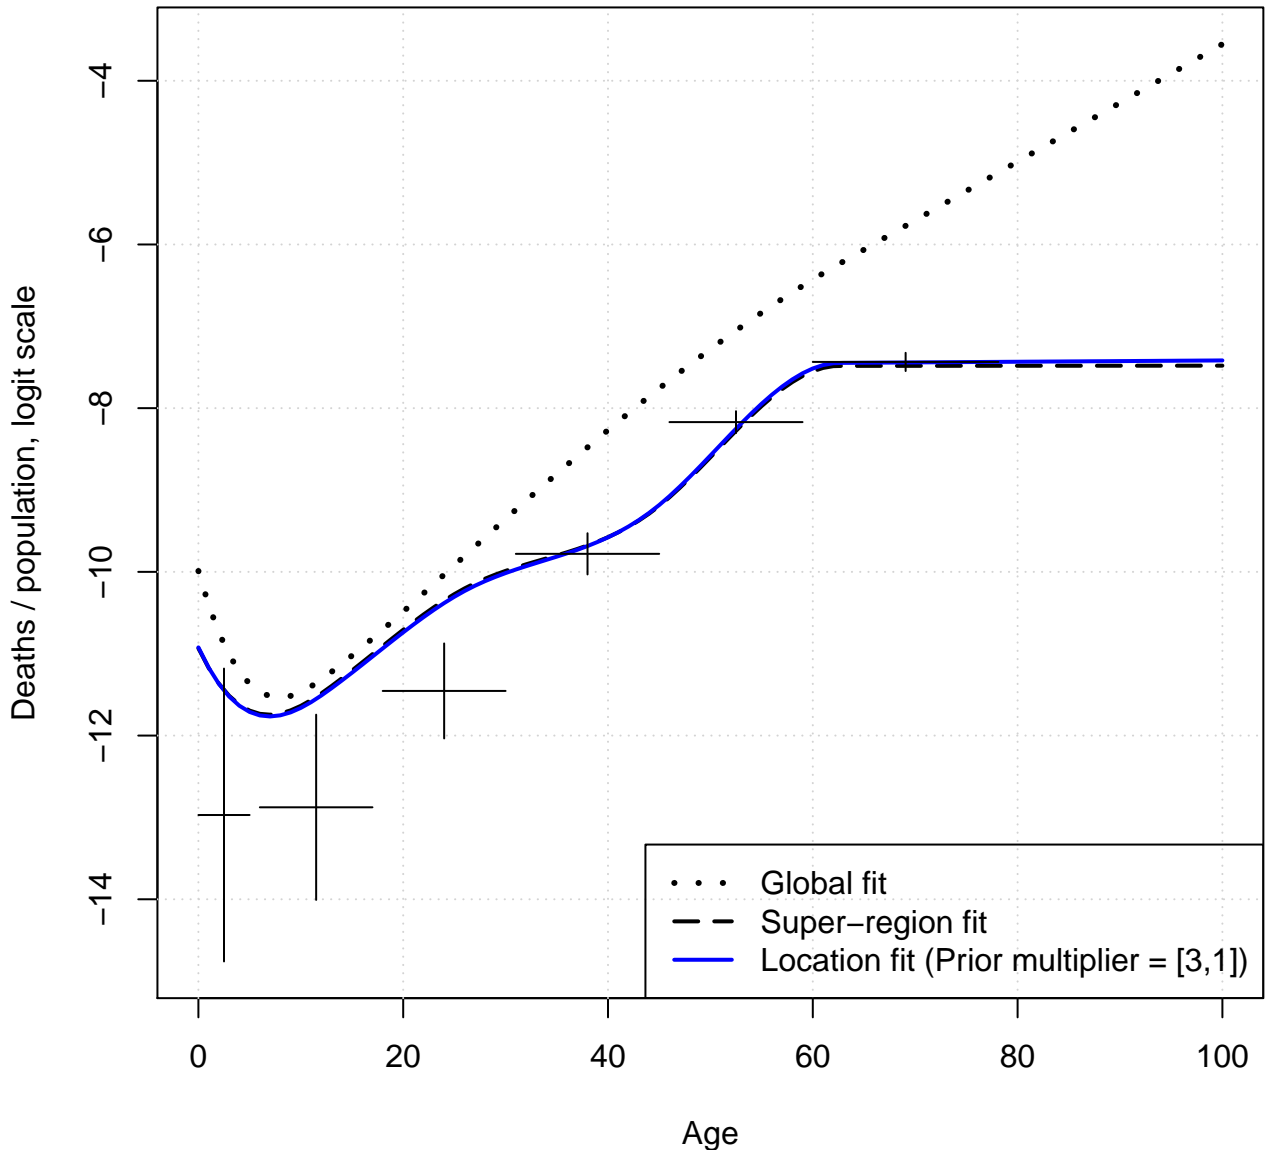



# Riau

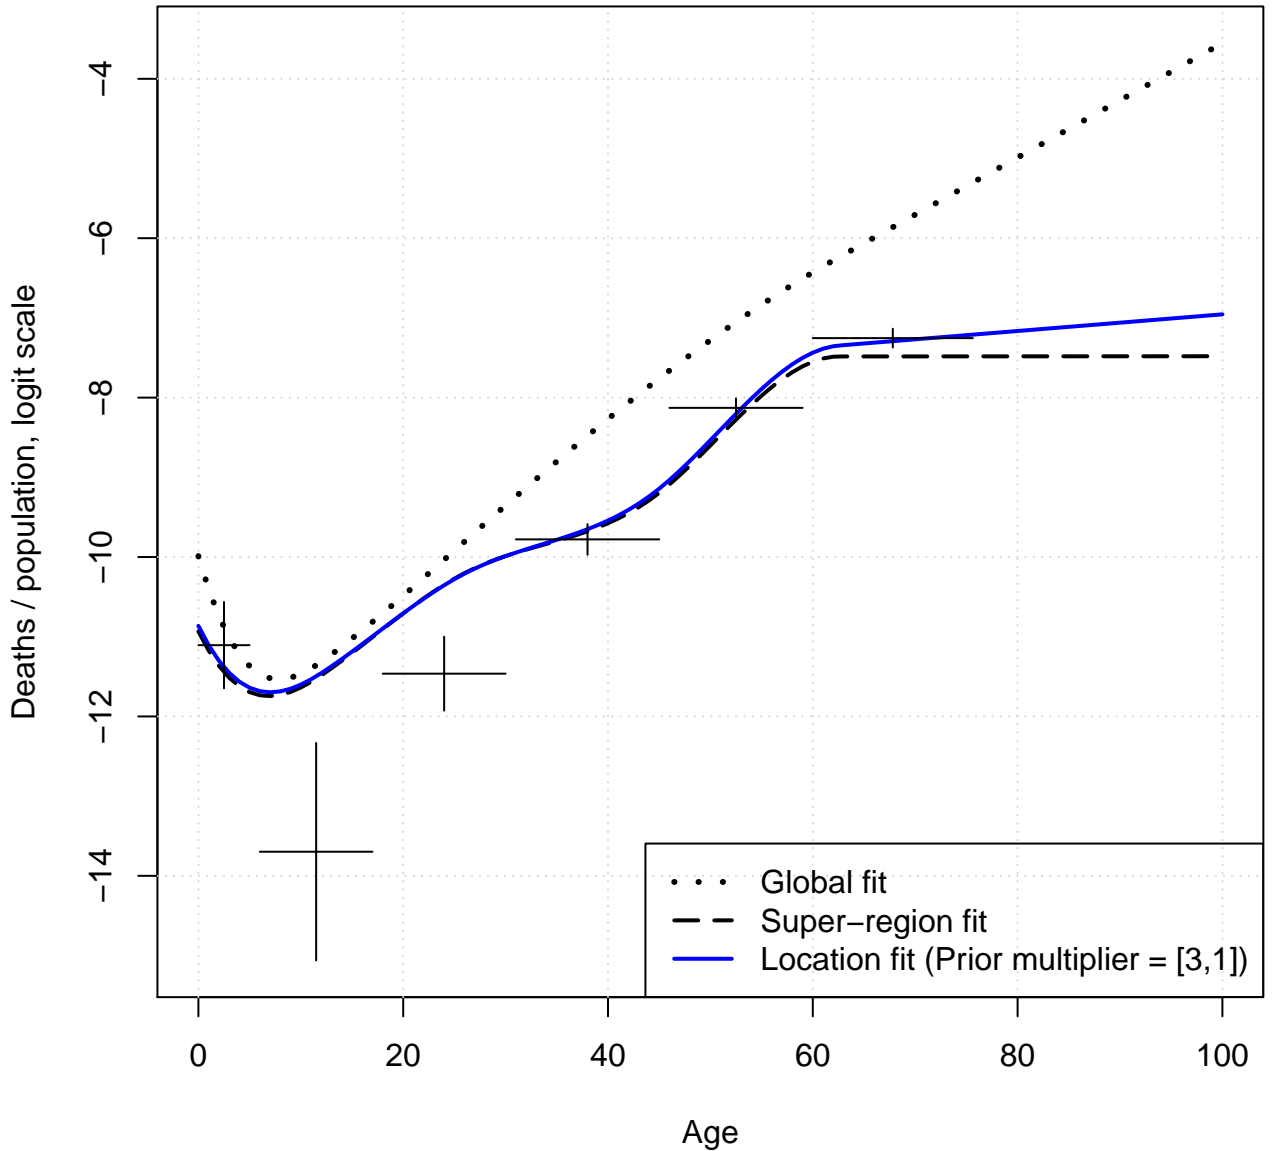

# South Sumatra

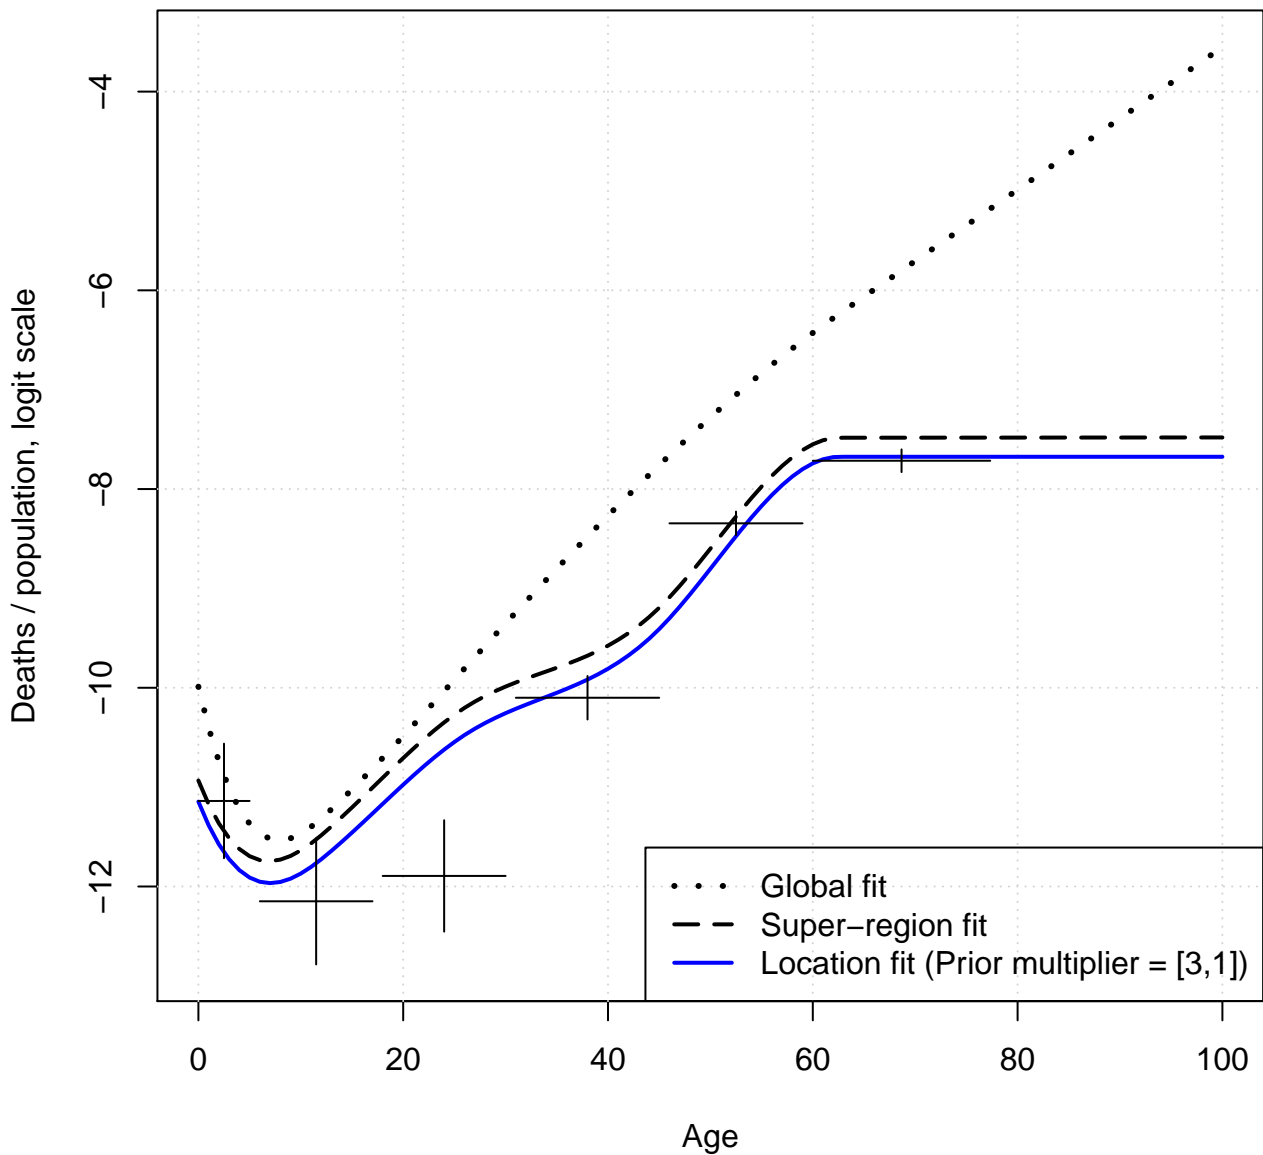

# Bengkulu

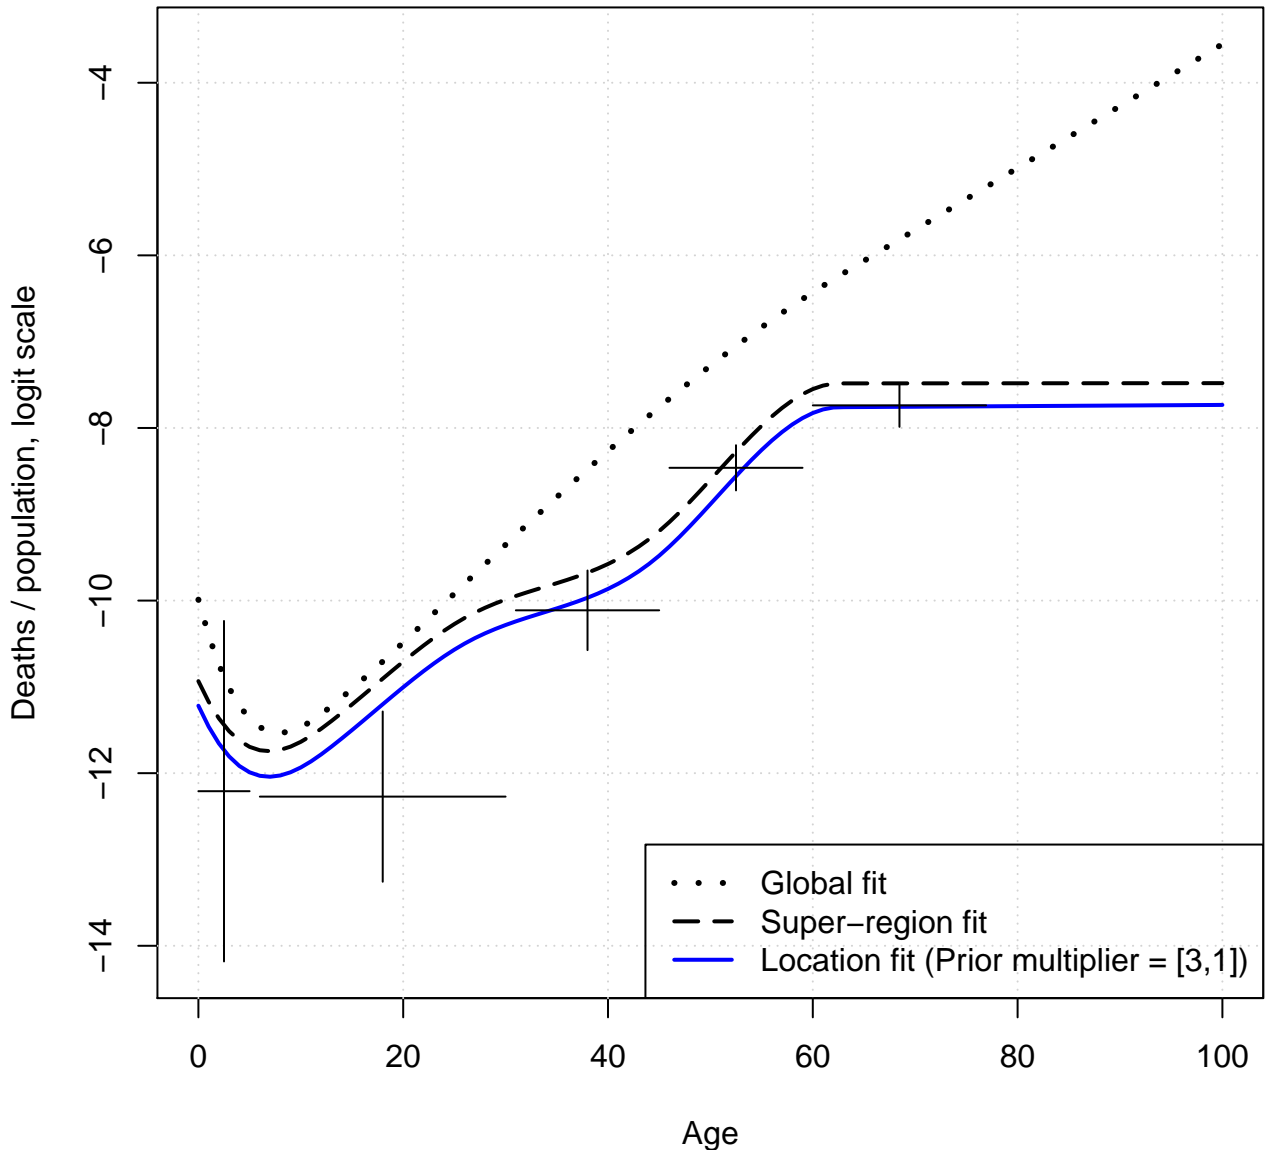

# Lampung

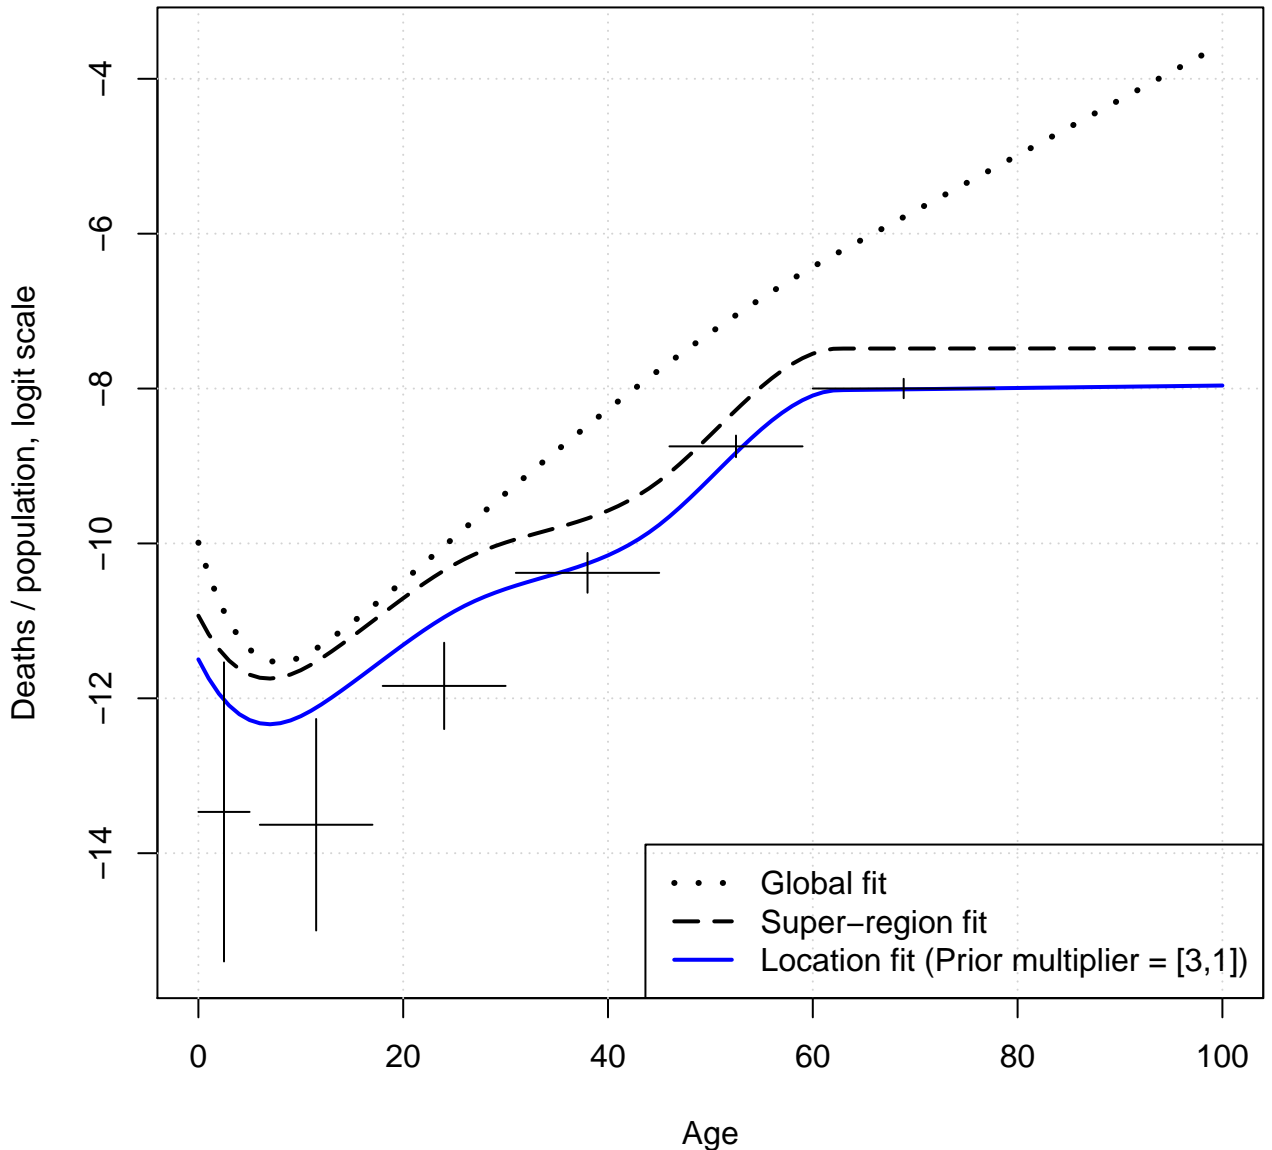

# Riau Islands

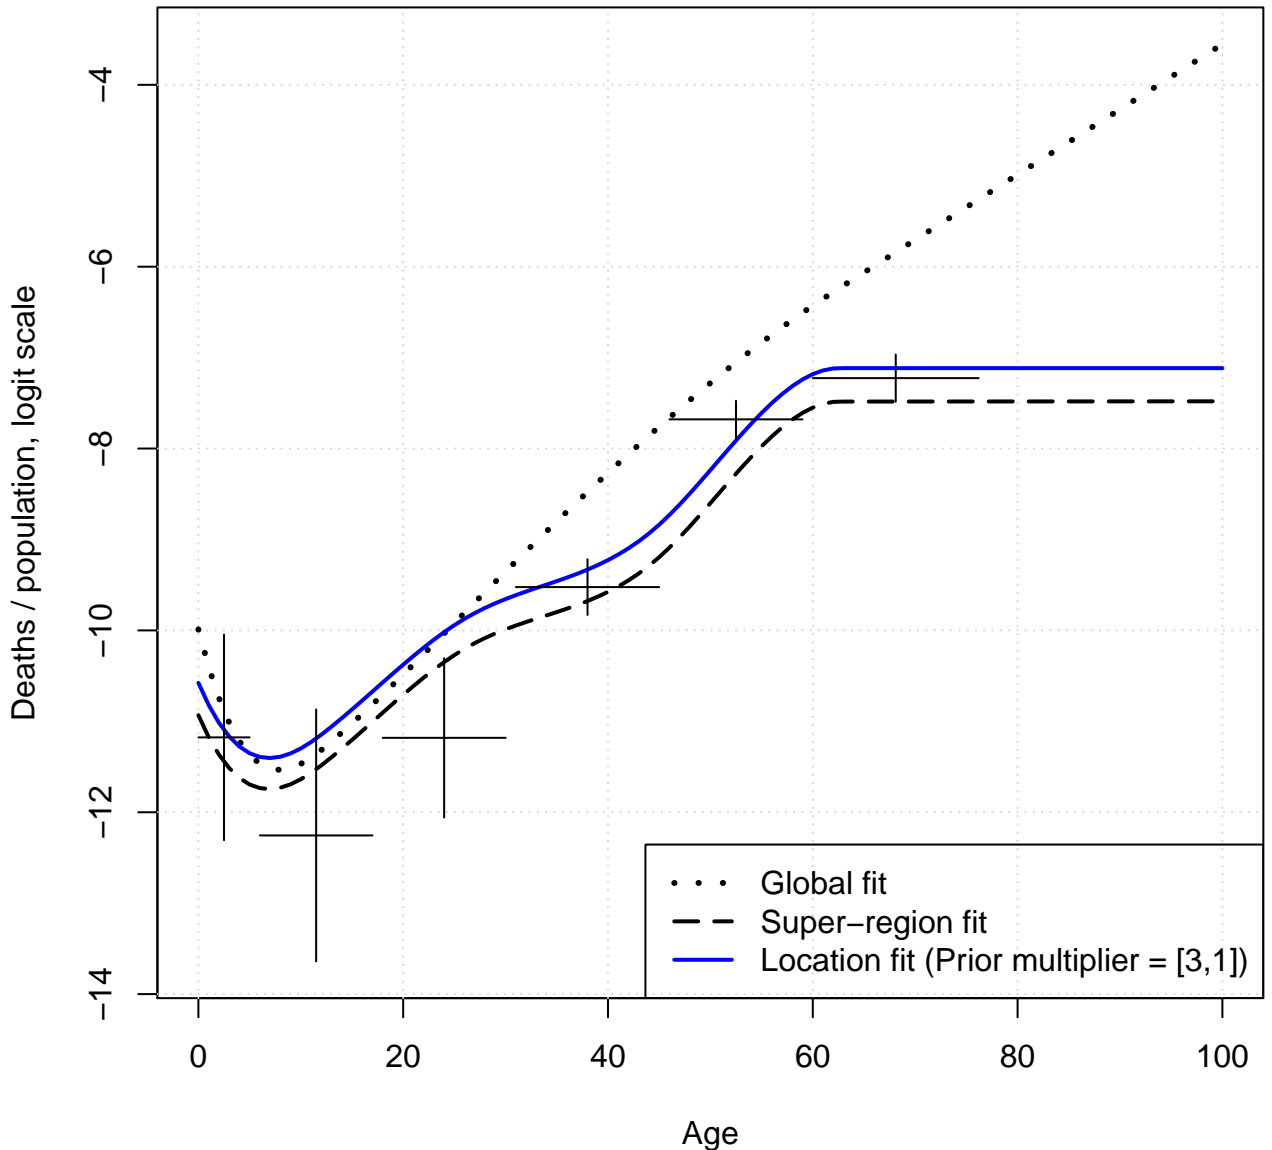

# Jakarta

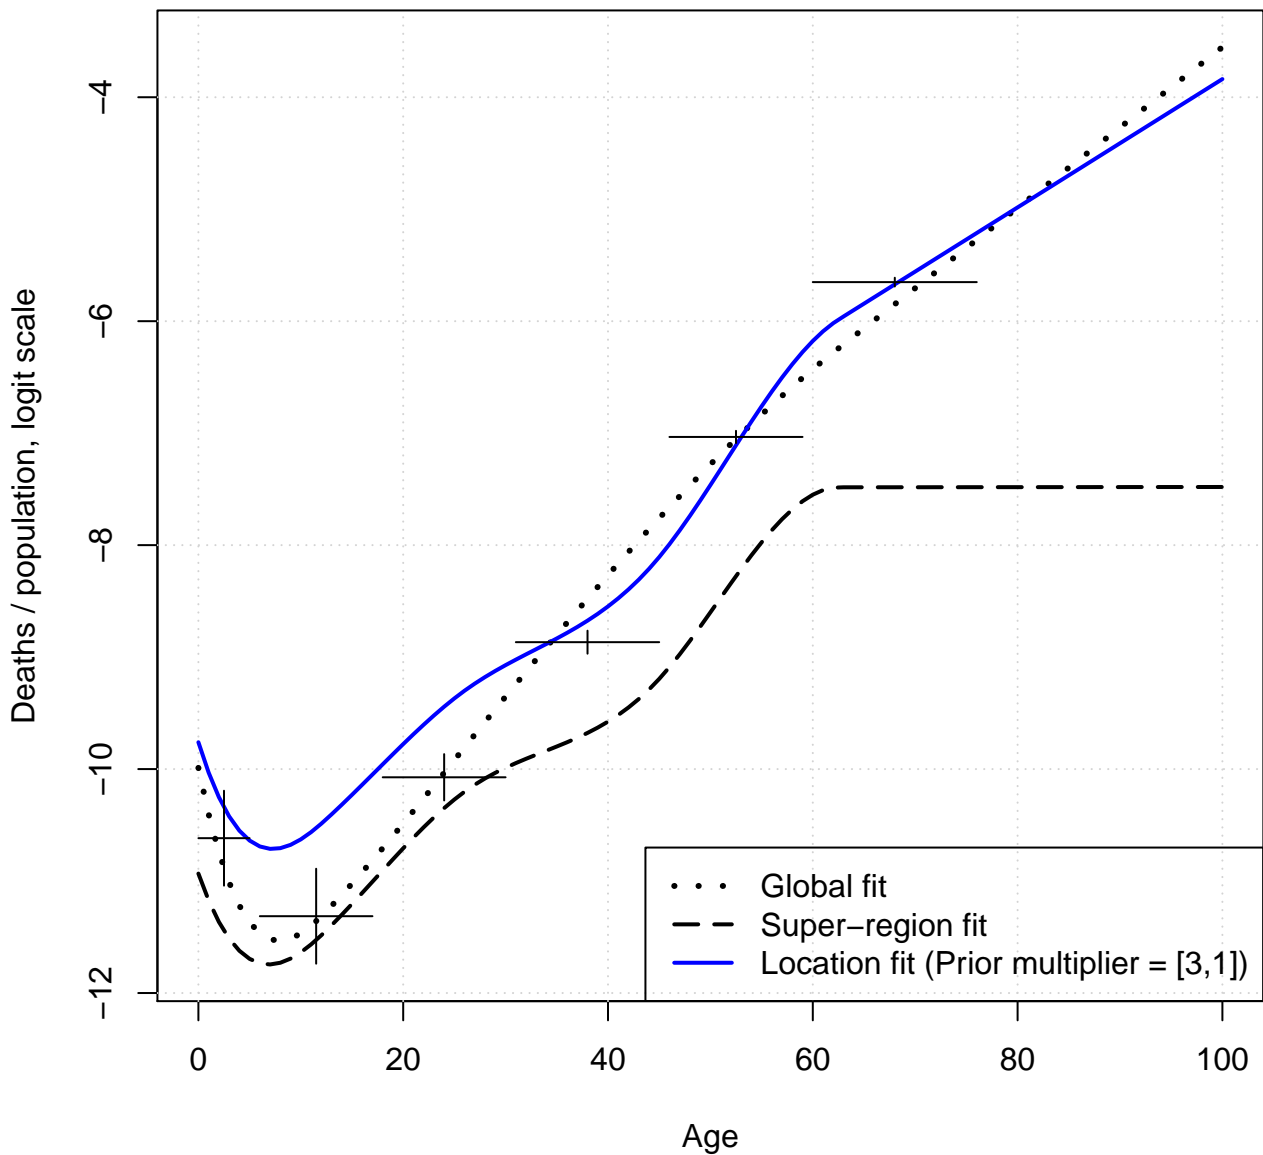

# West Java

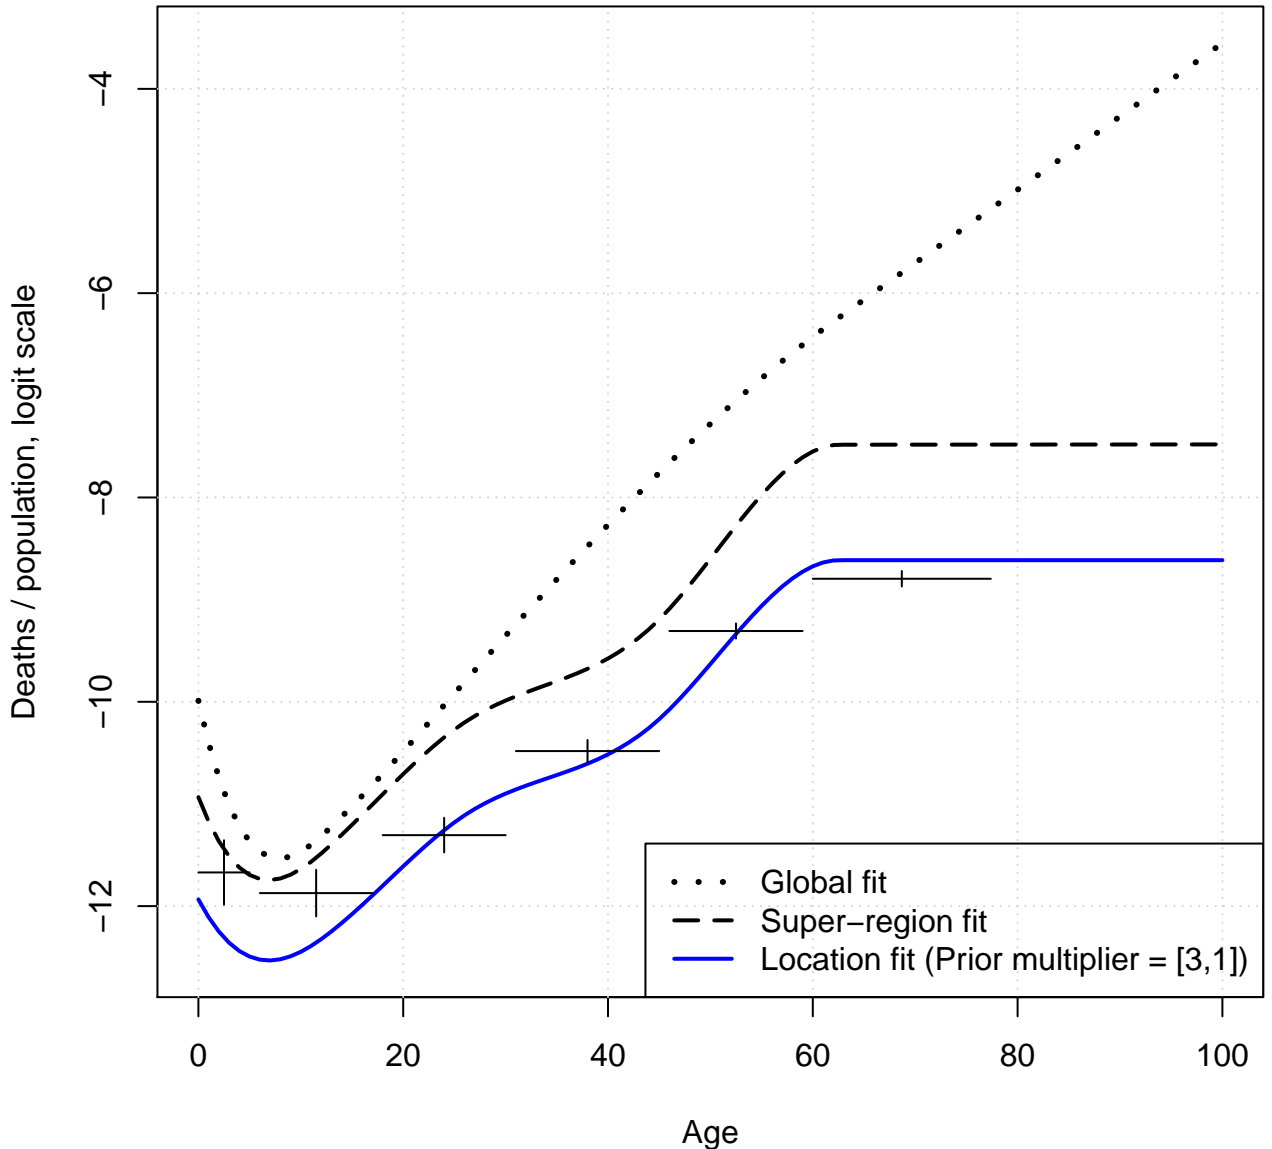

# Central Java

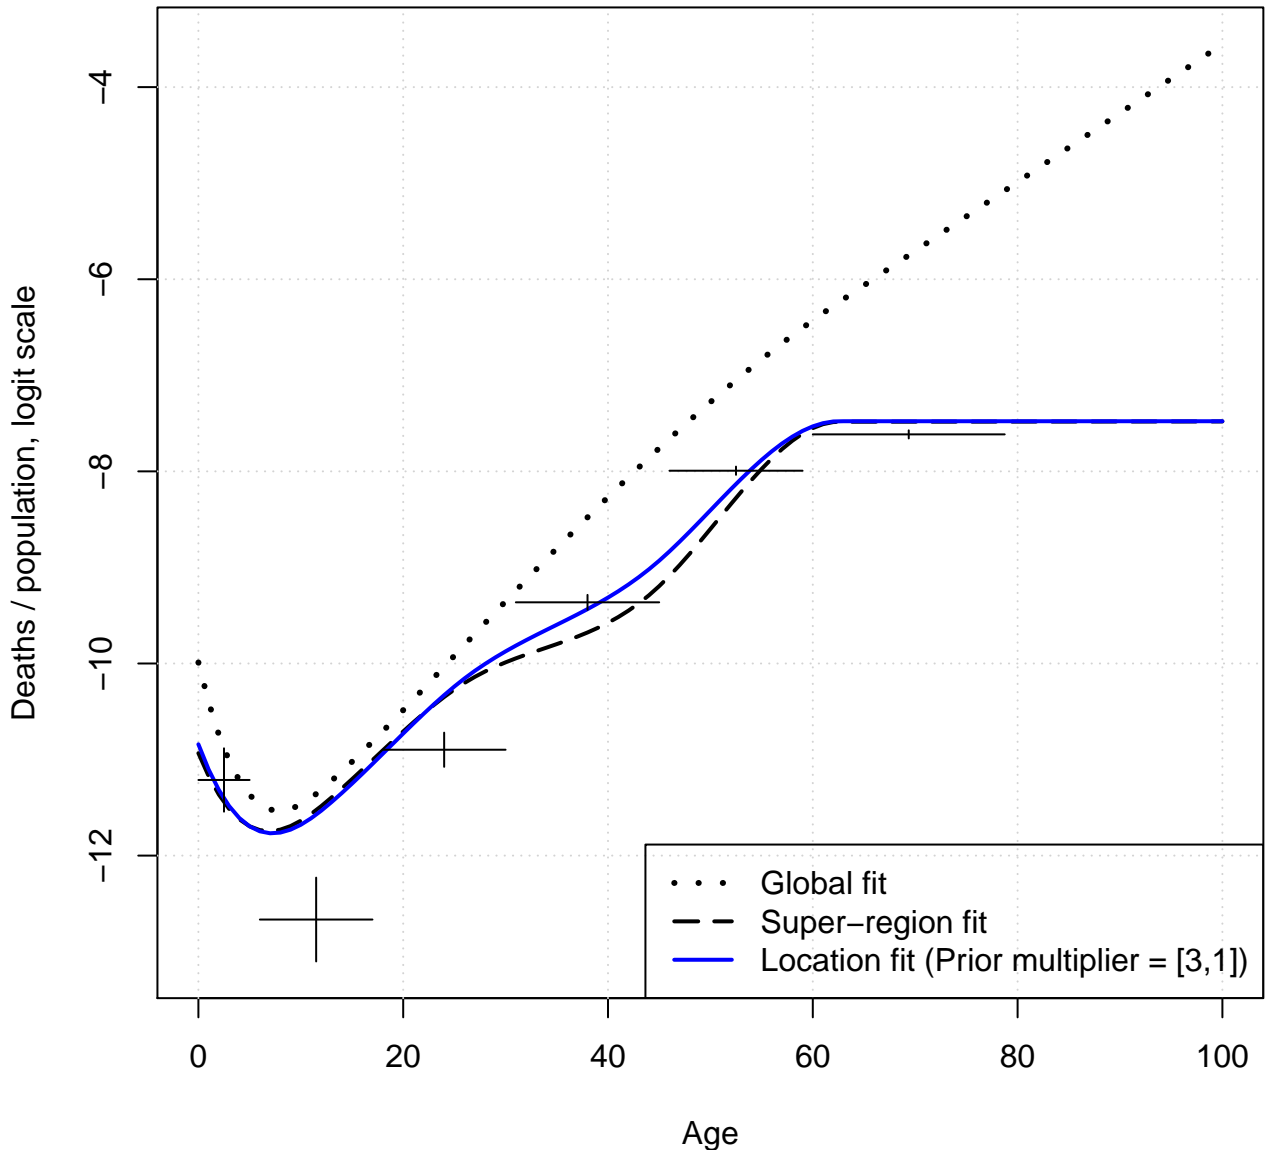



# Yogyakarta

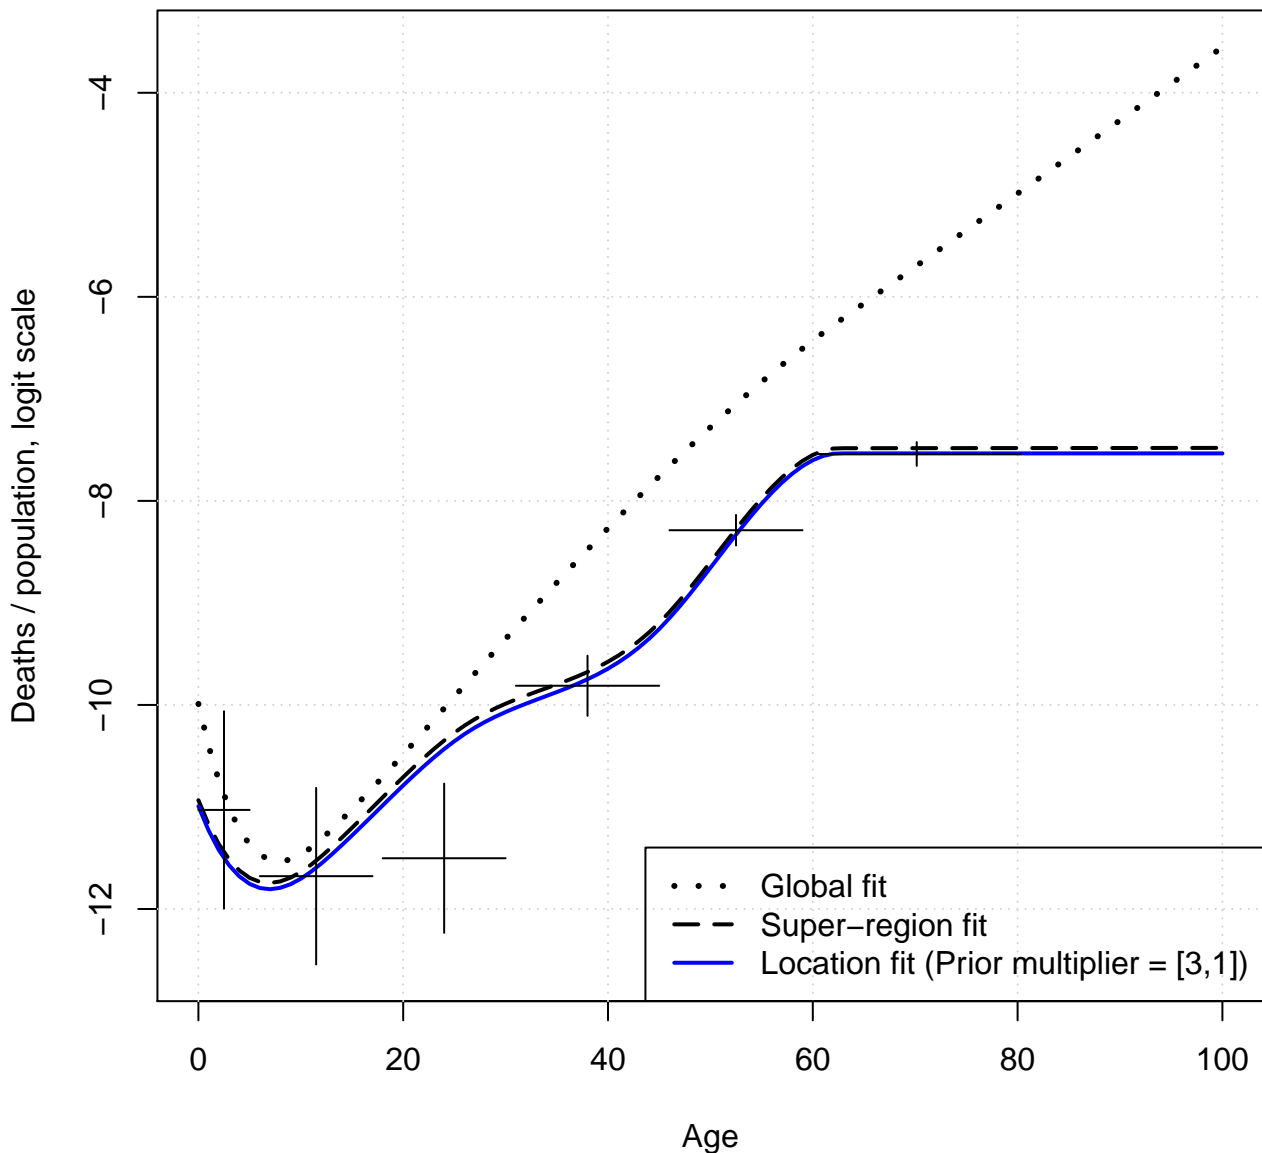

# East Java

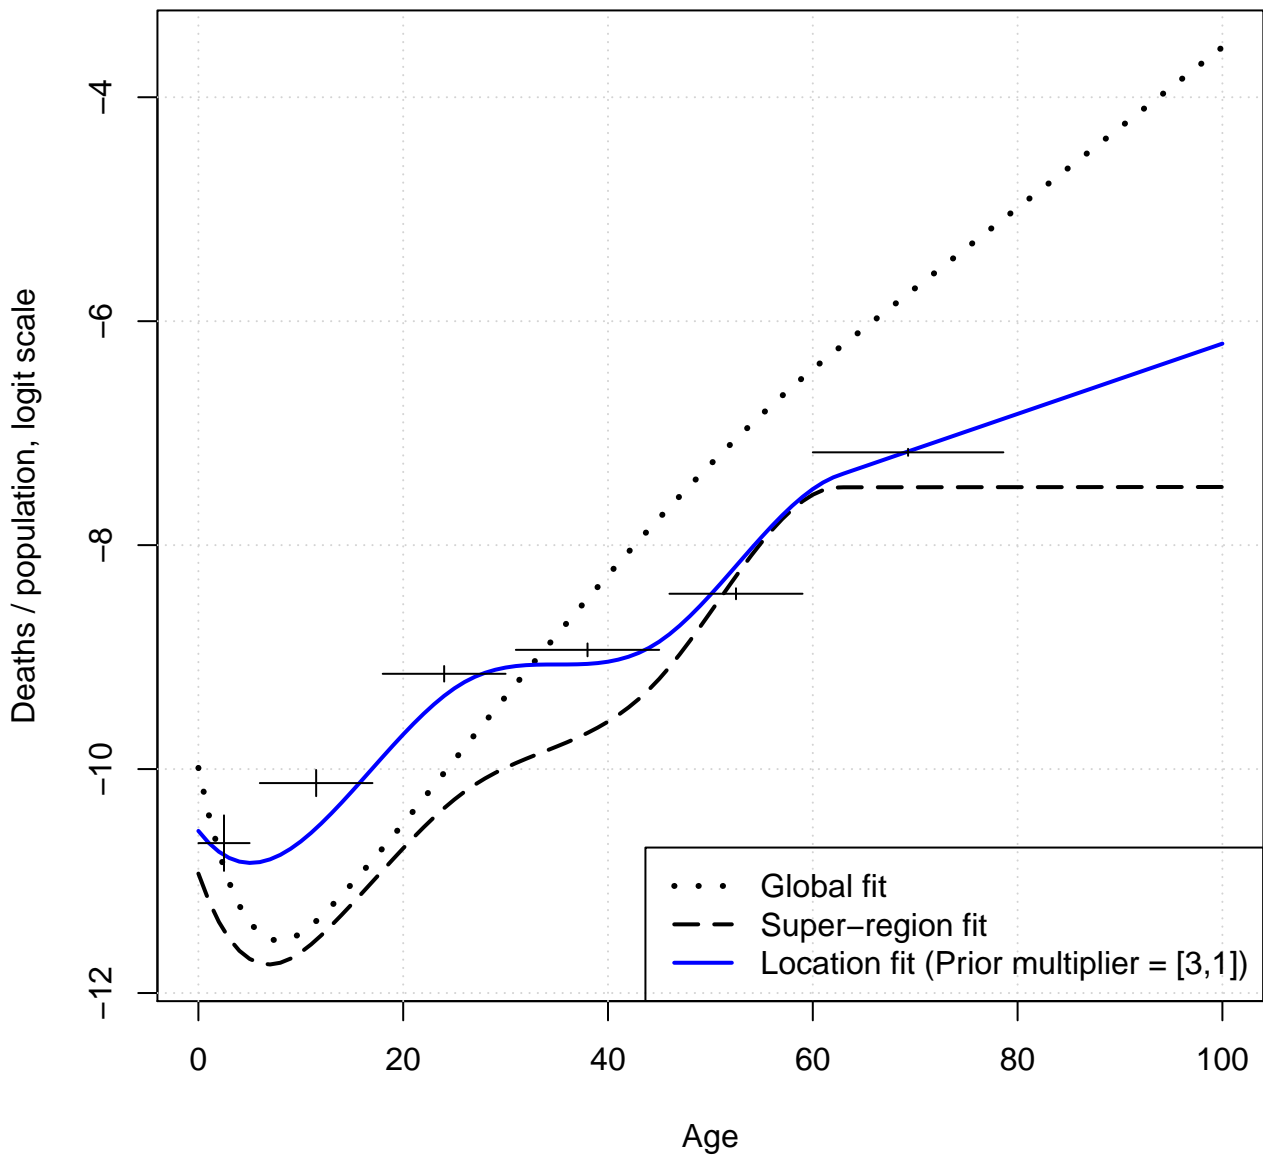

# Banten

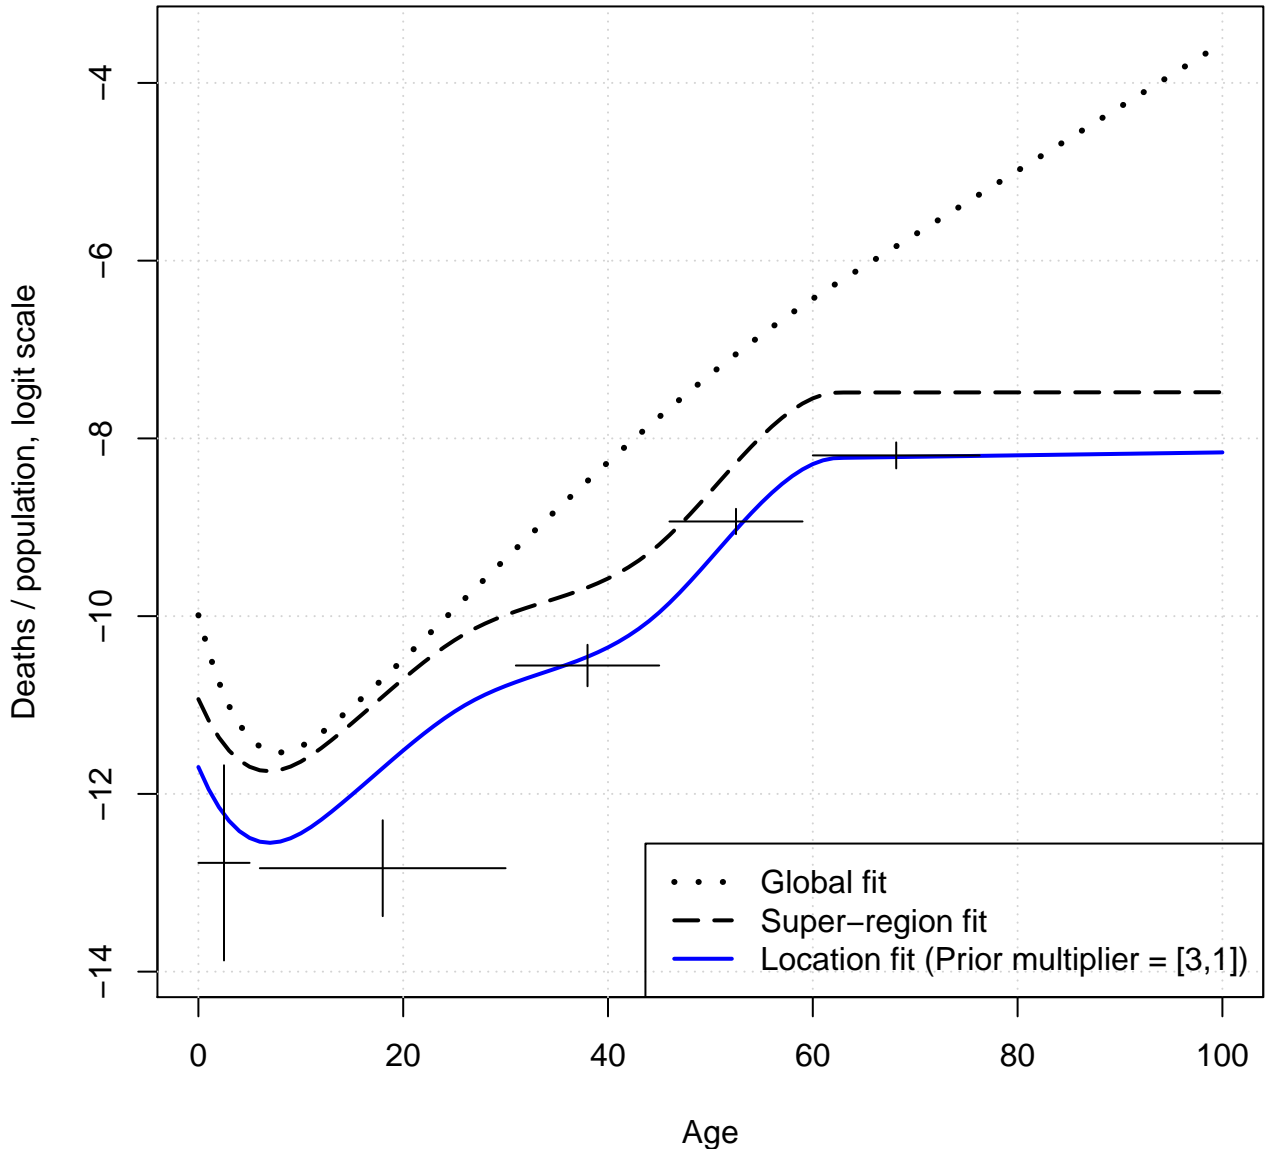

# Bali

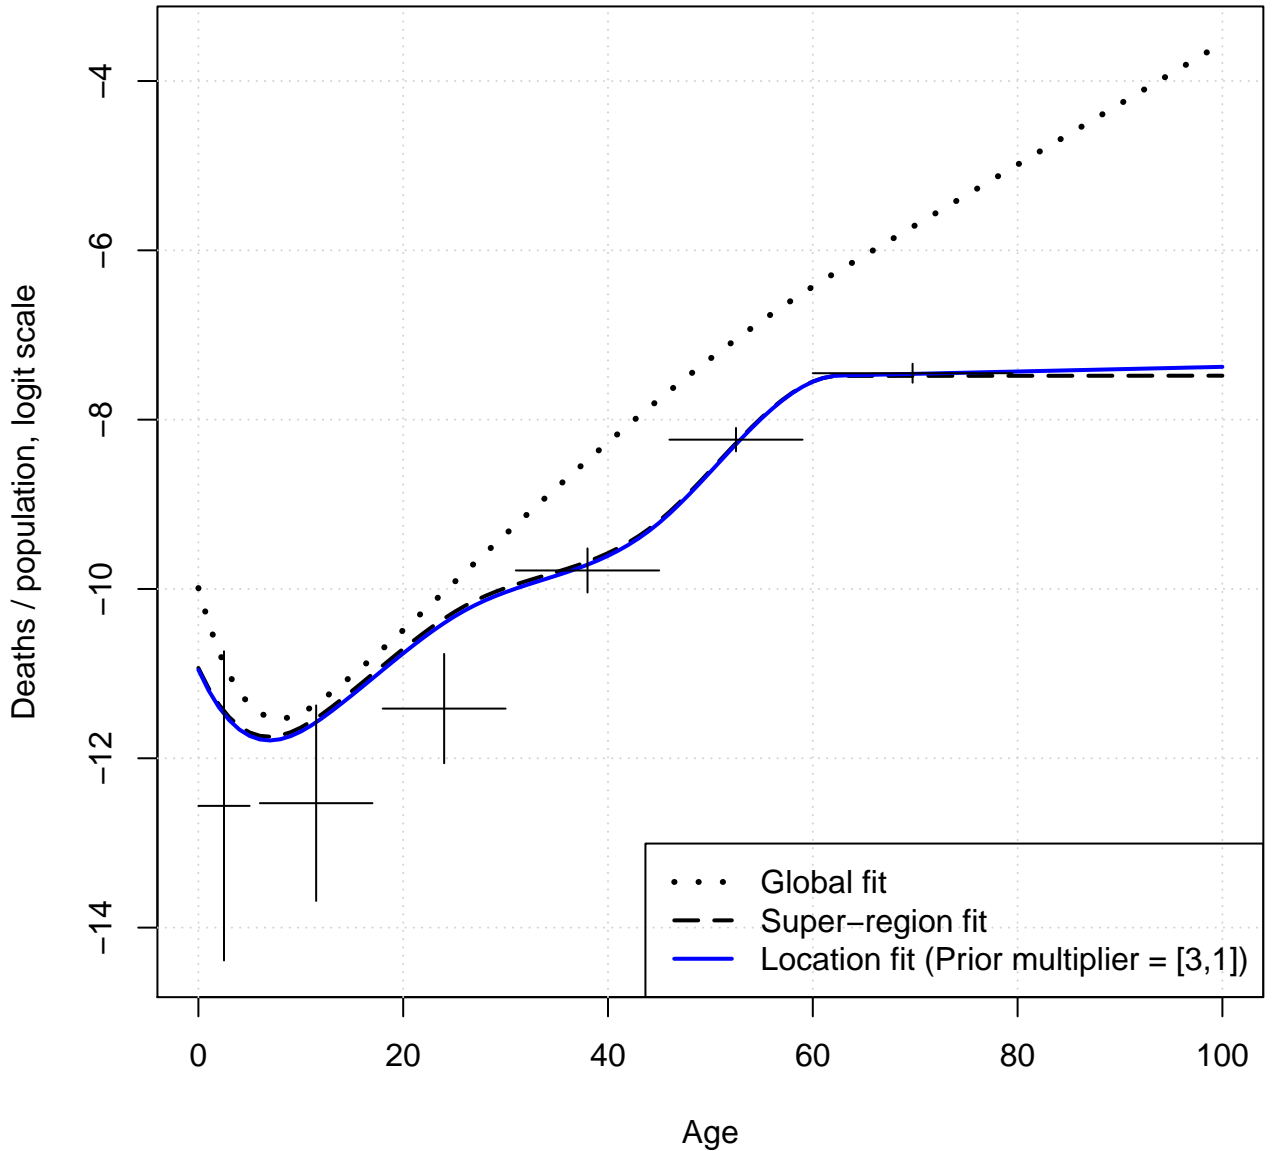

# West Nusa Tenggara

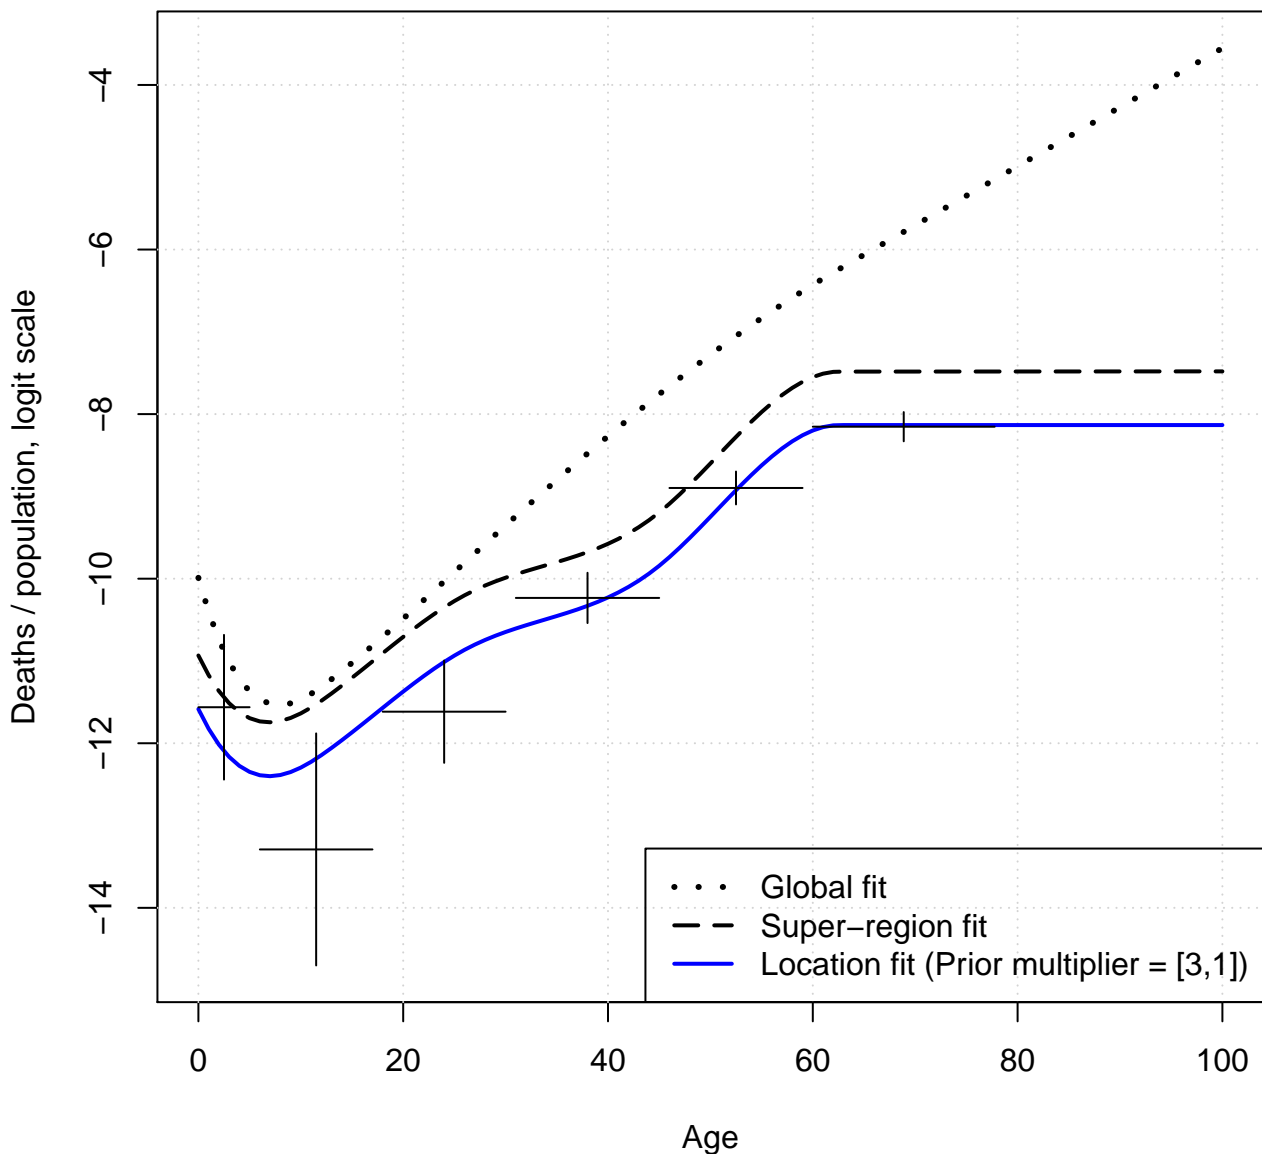

# Central Kalimantan

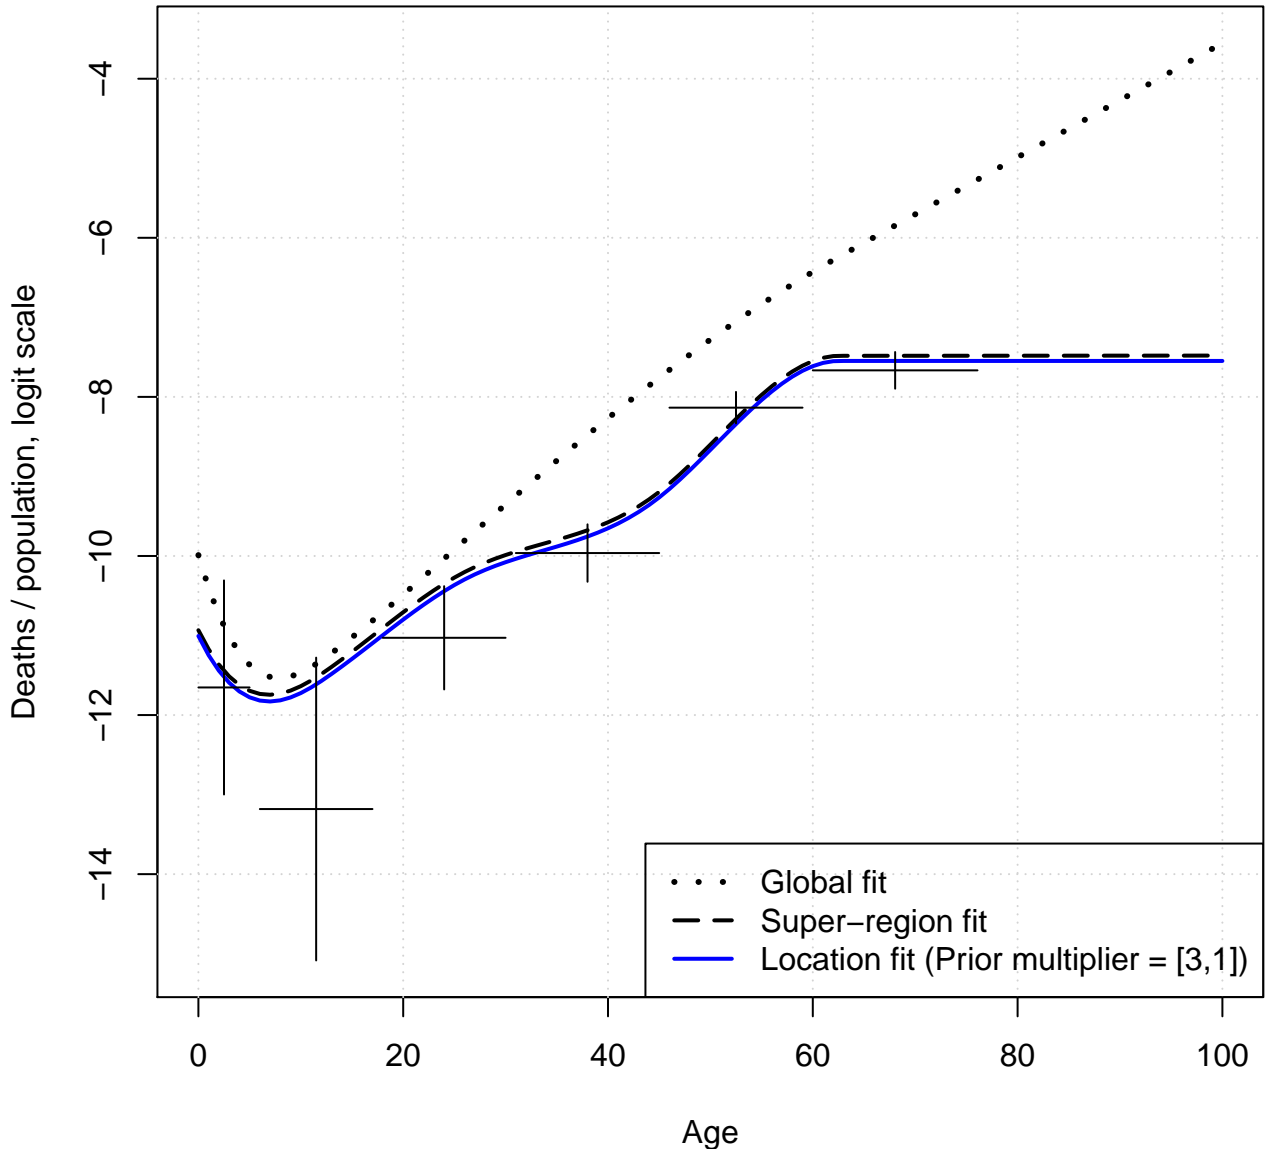

# South Kalimantan

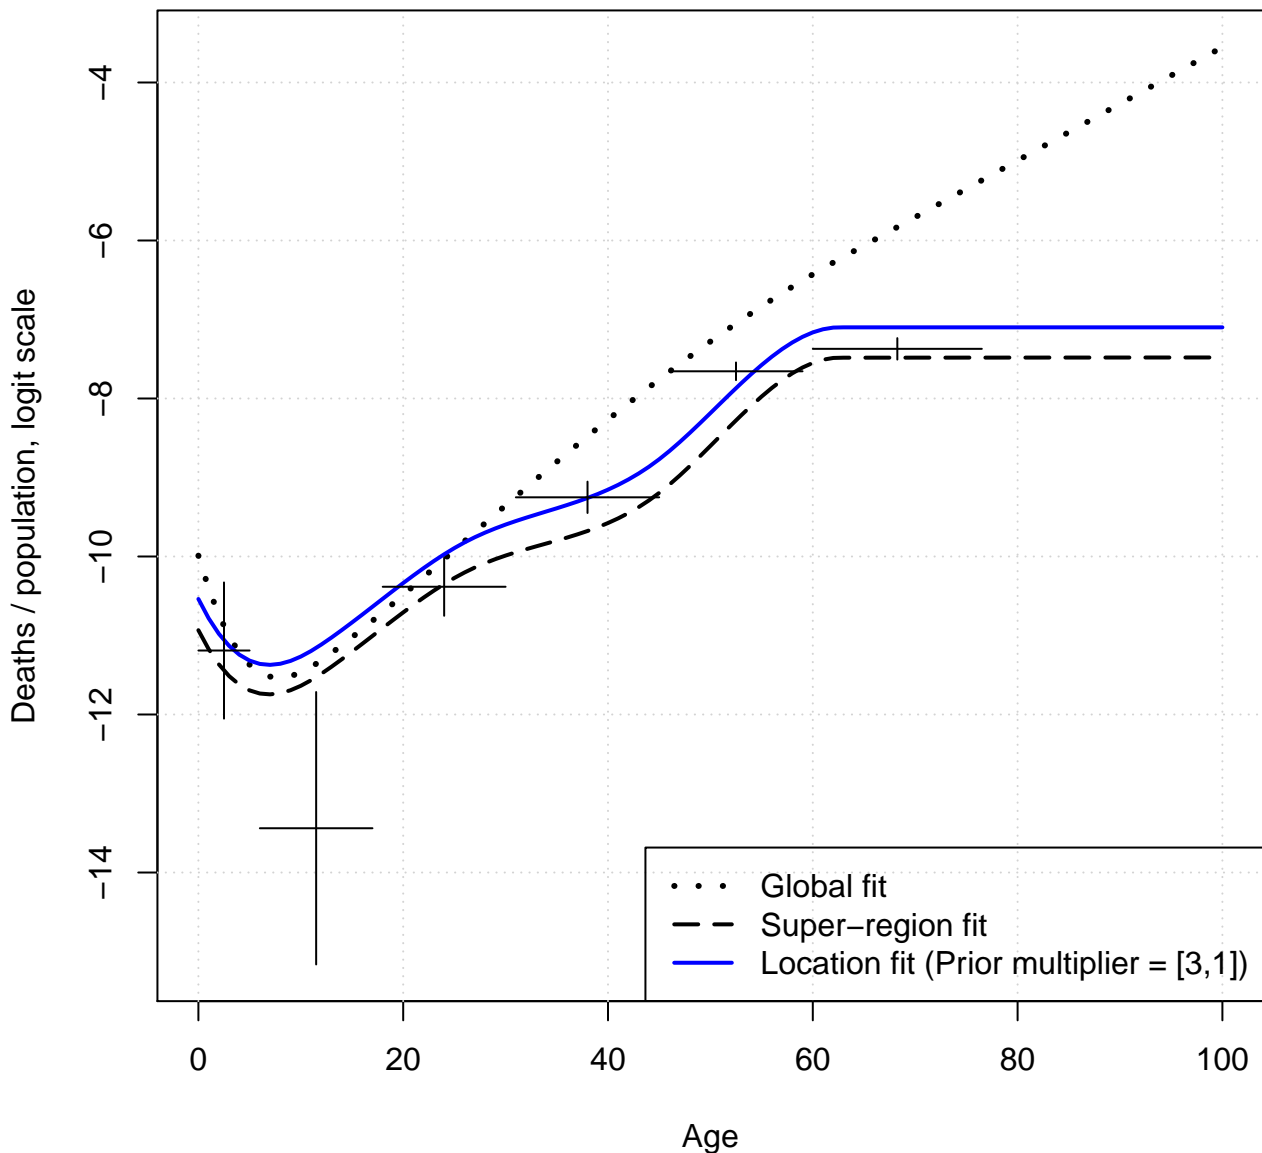

# East Kalimantan

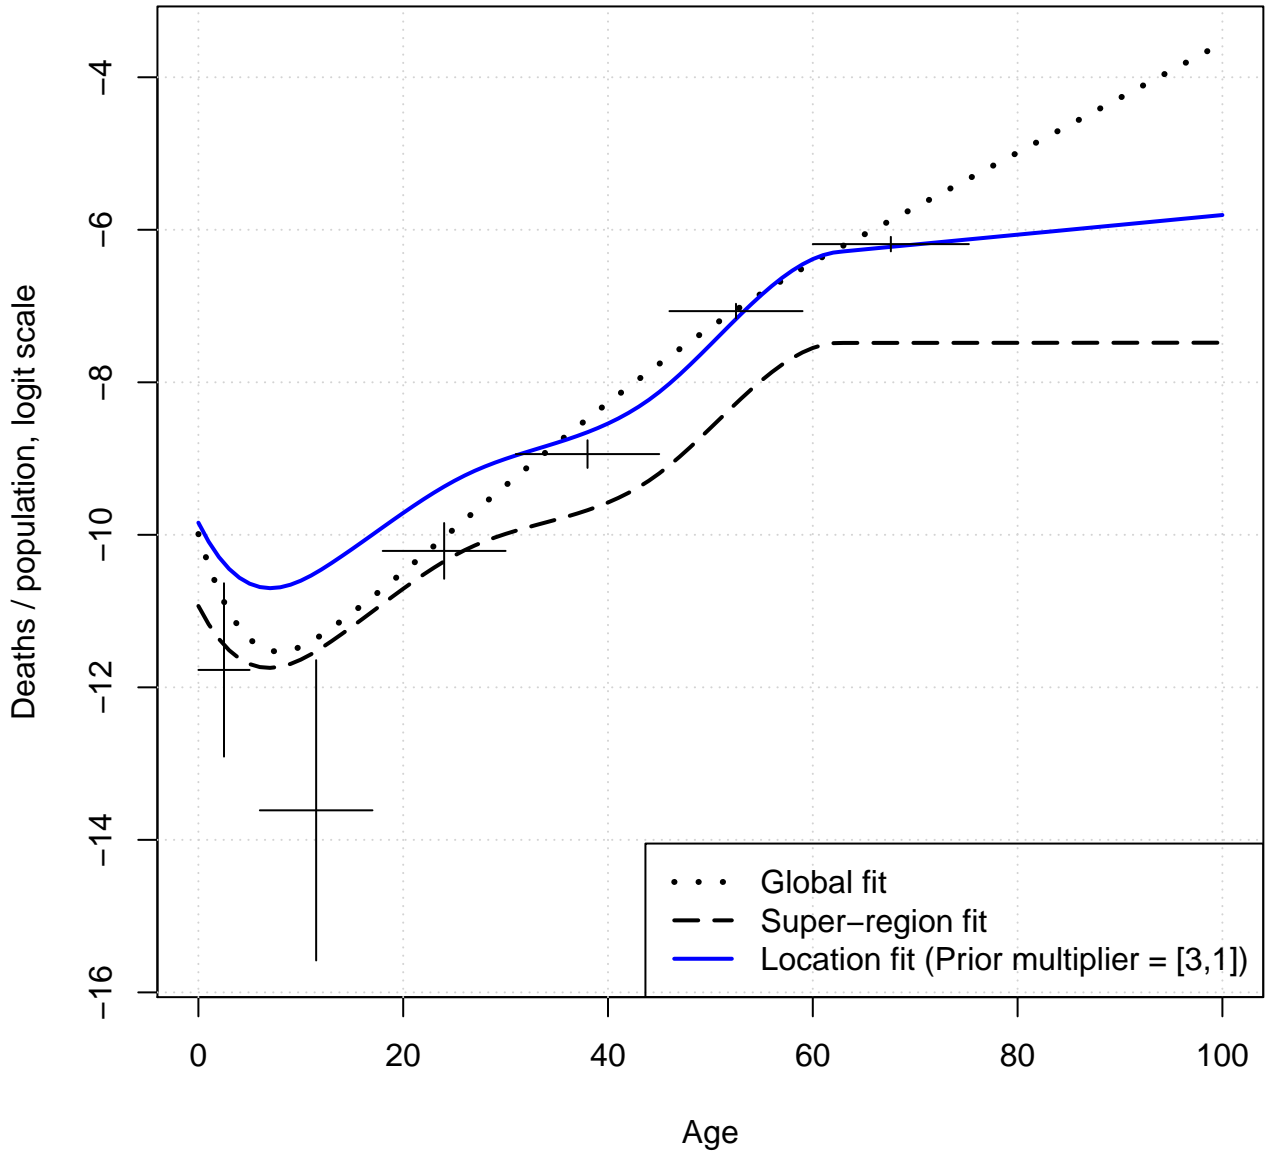



# North Sulawesi

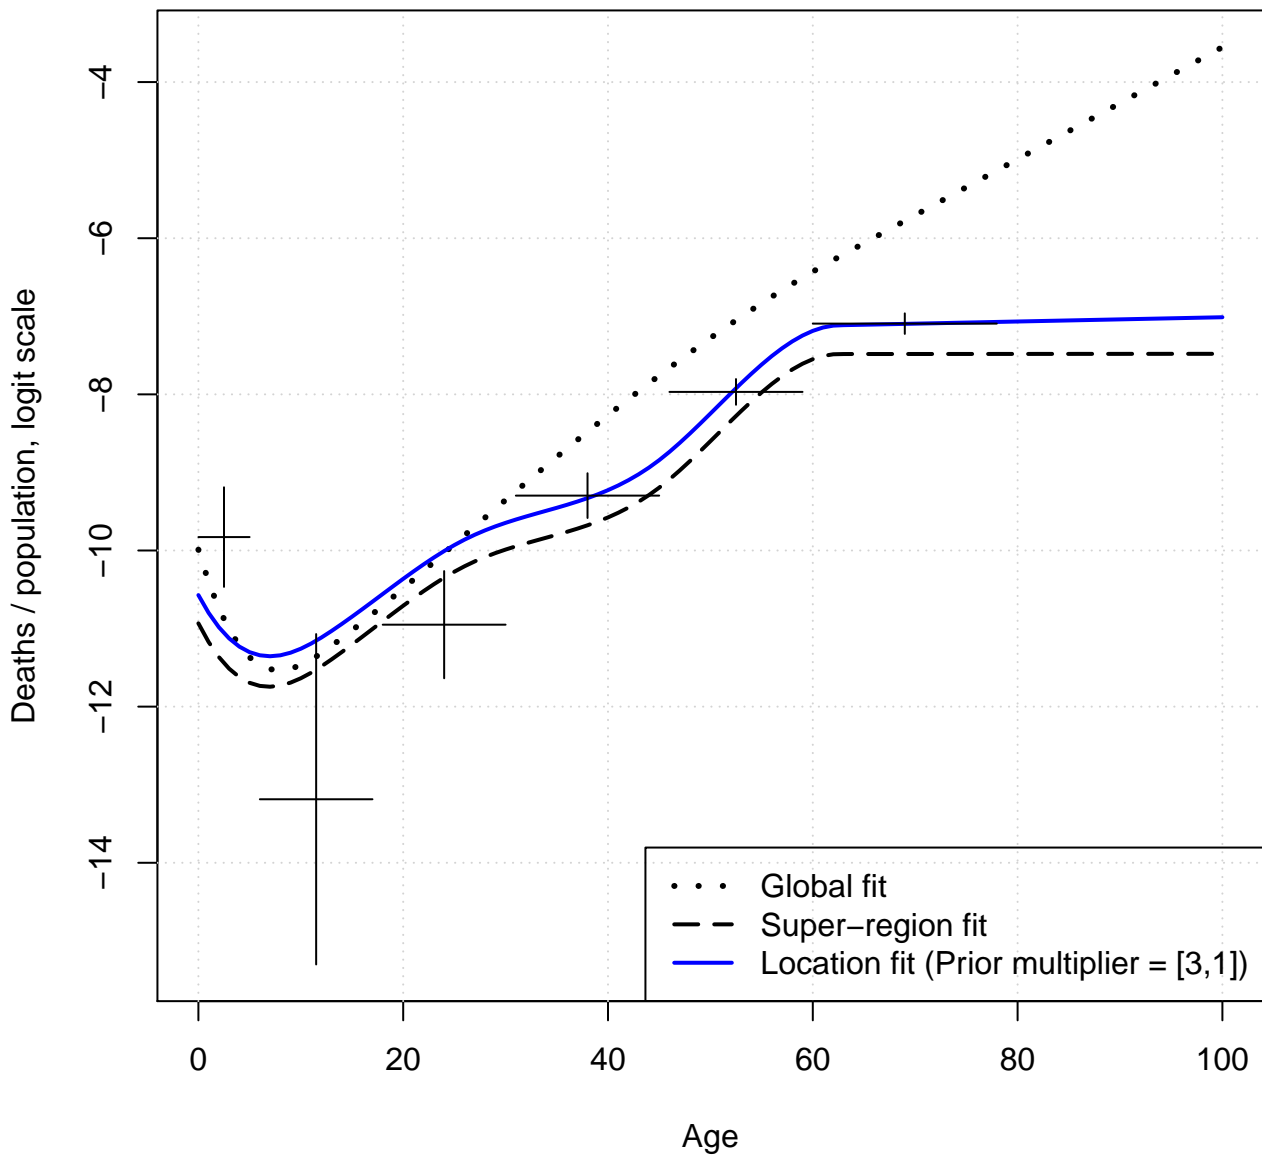

# South Sulawesi

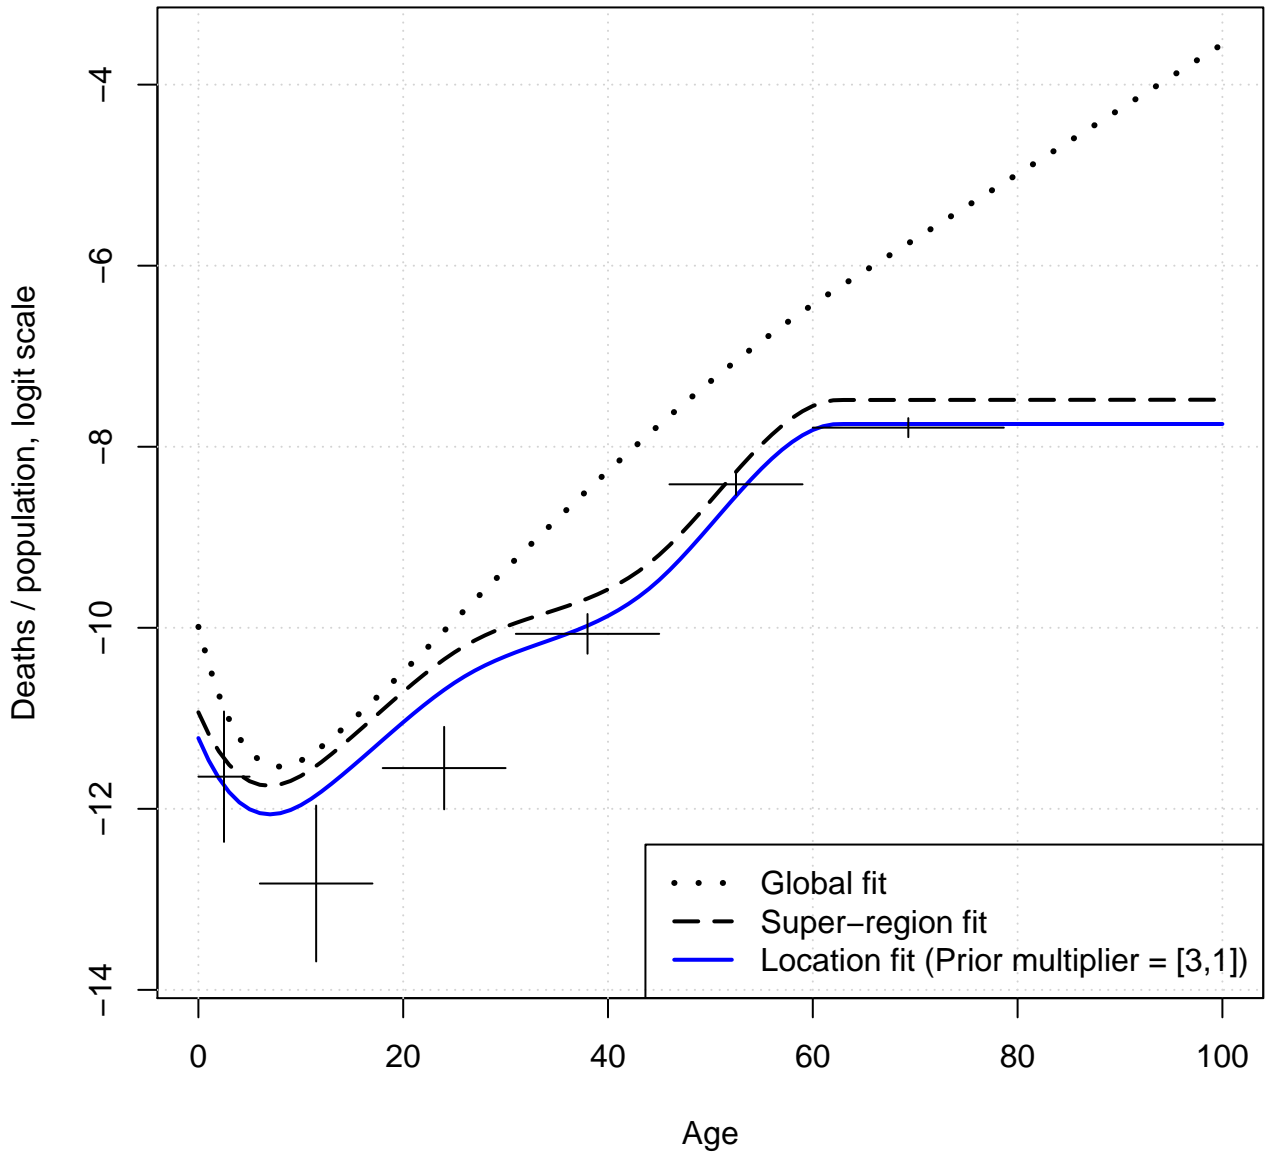

# Southeast Sulawesi

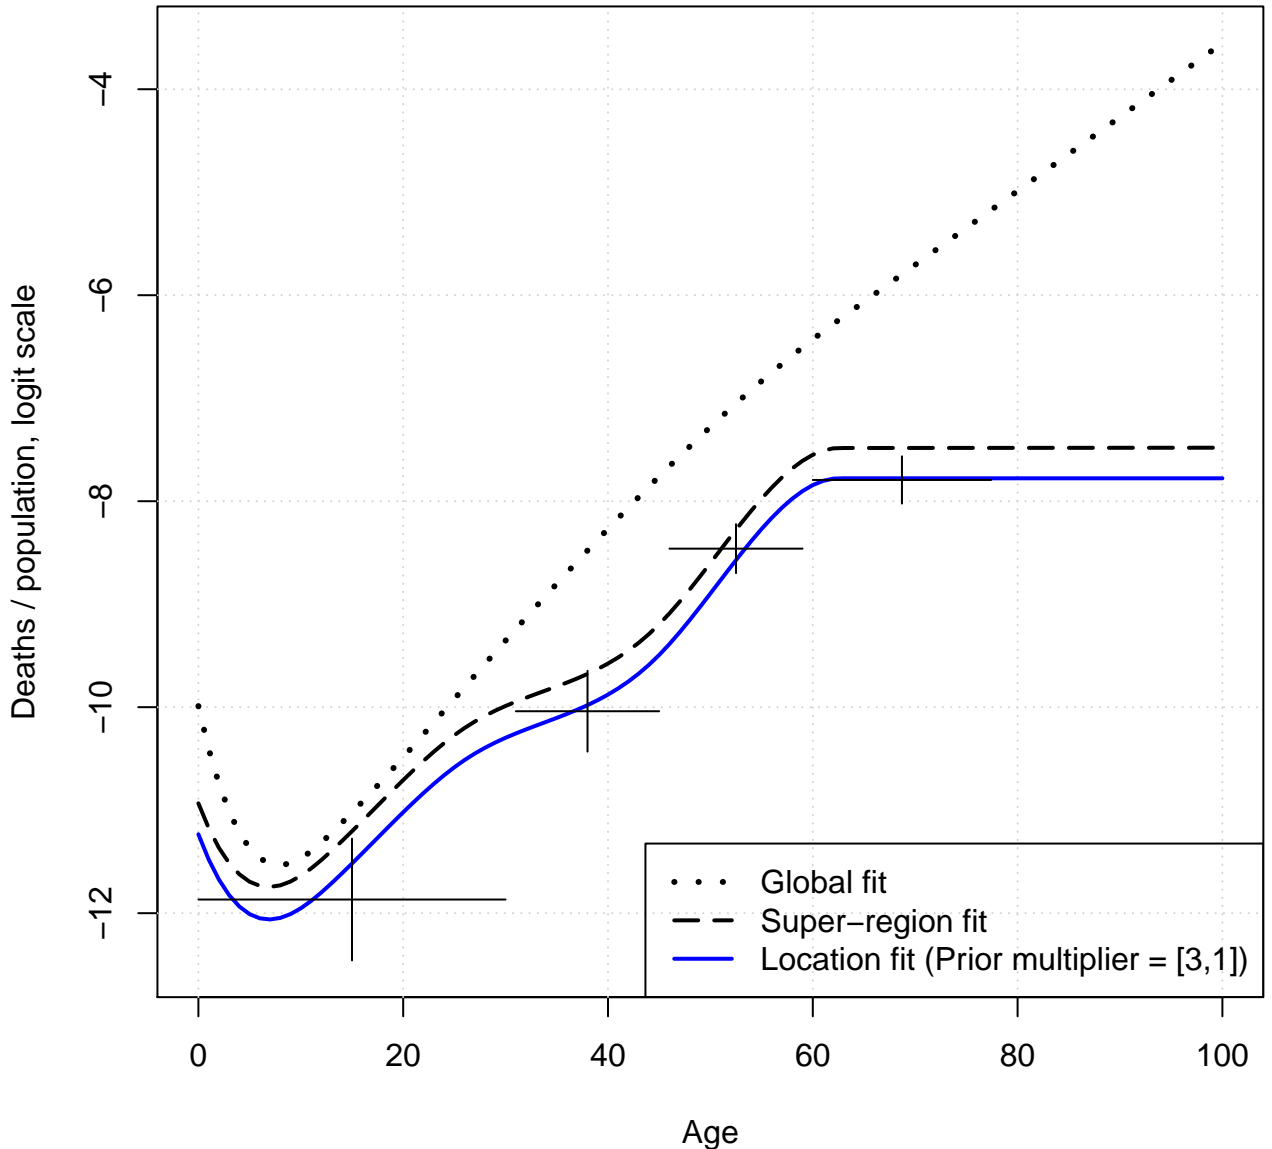

# Gorontalo

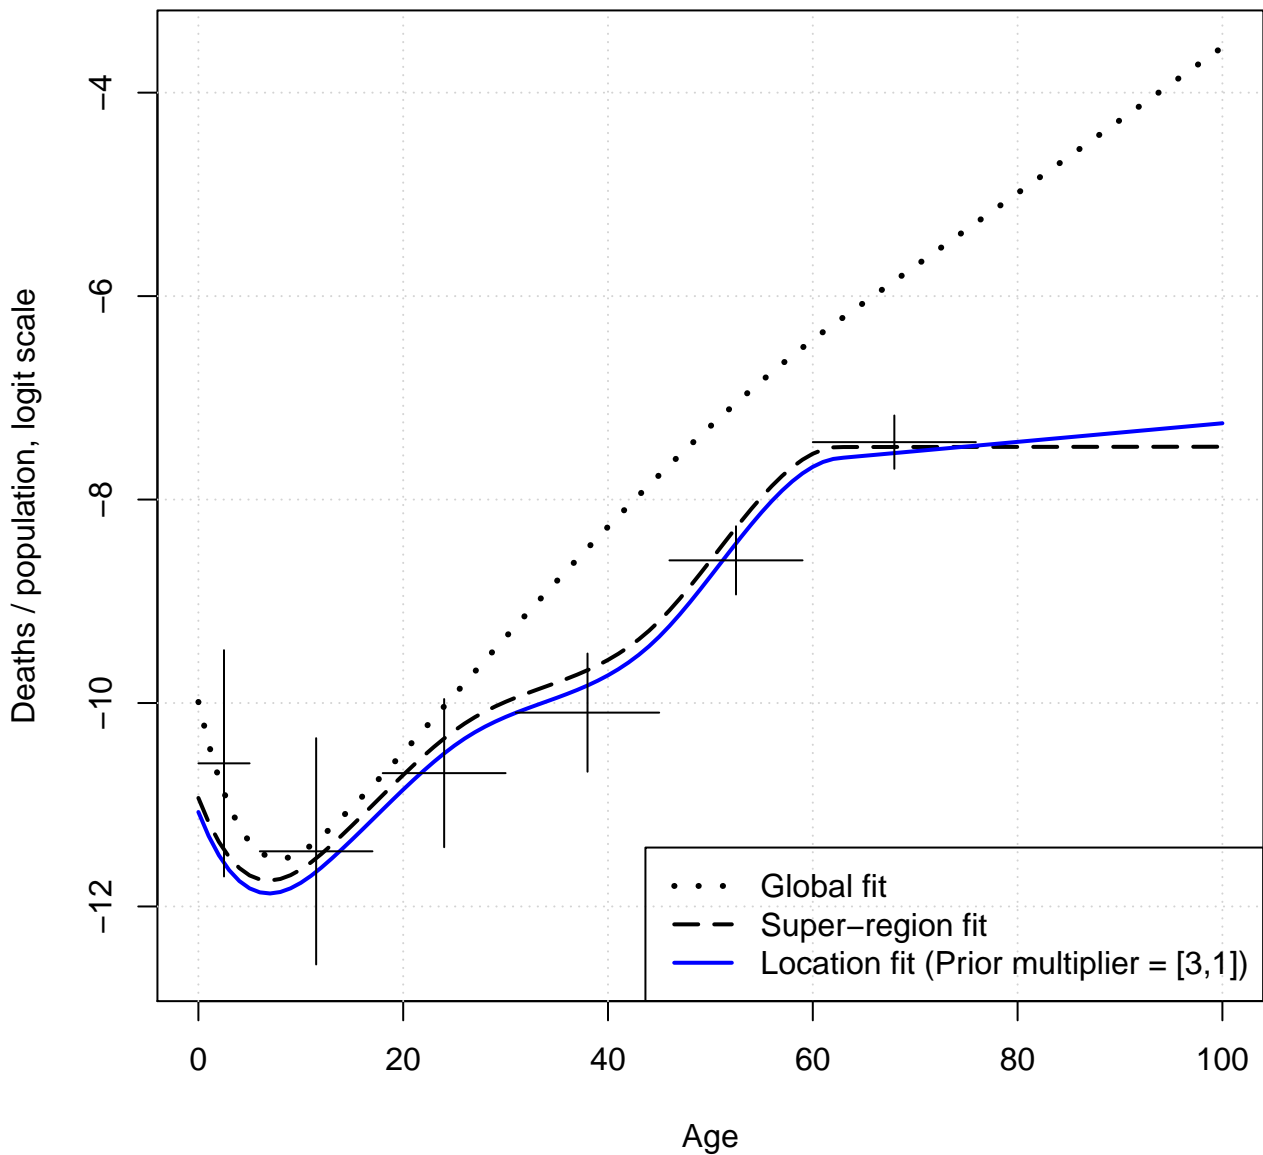

# Maluku

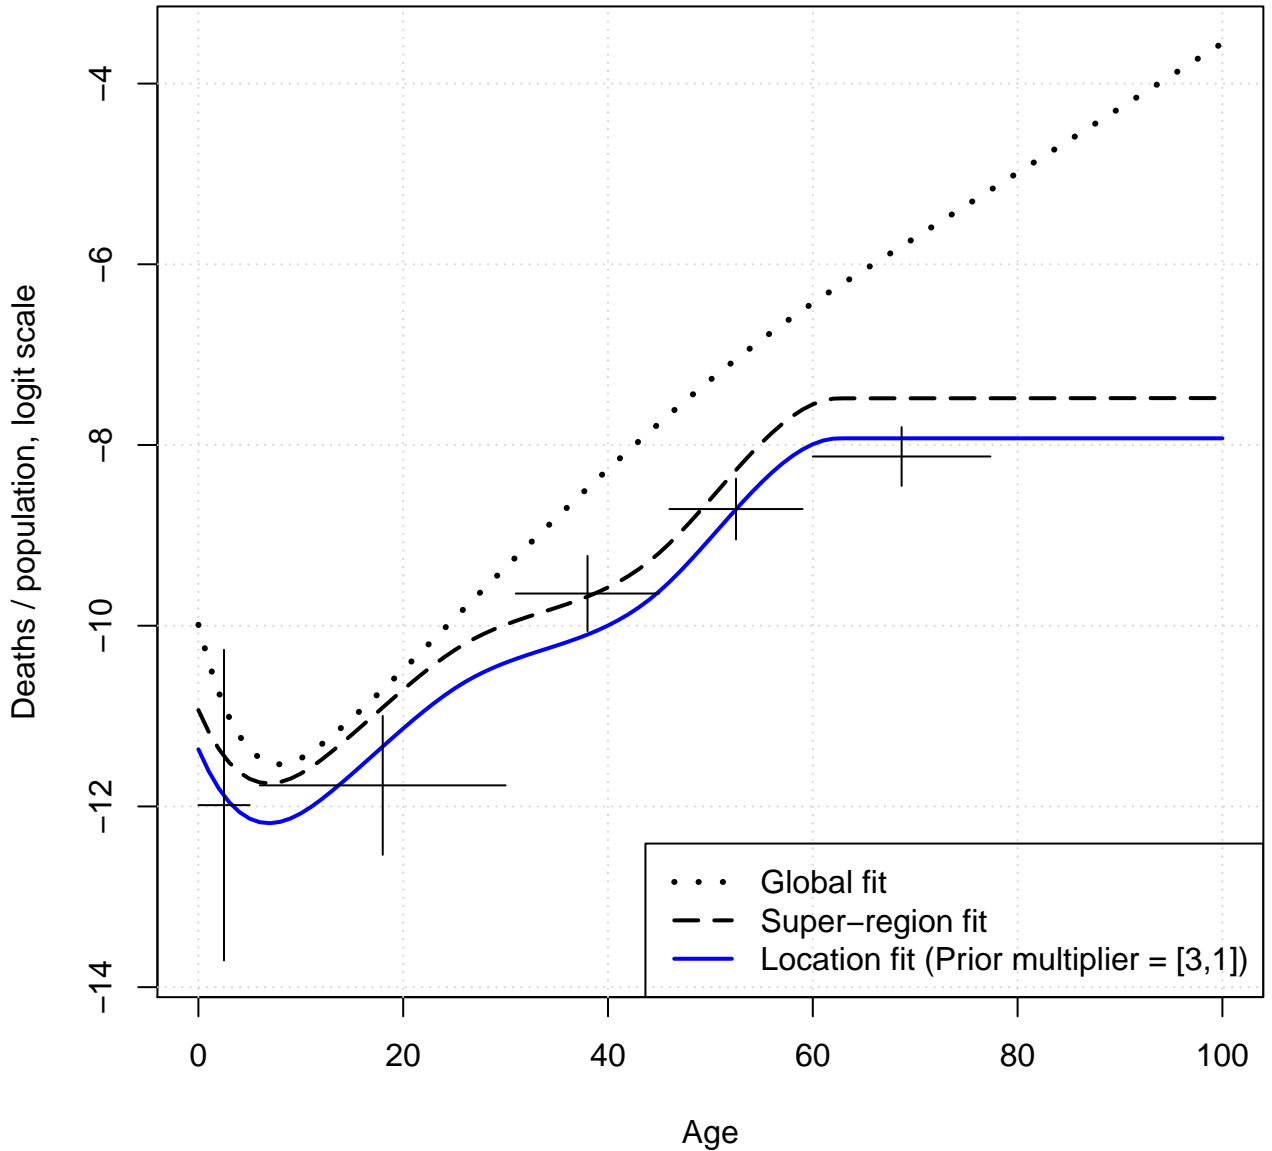

# North Maluku

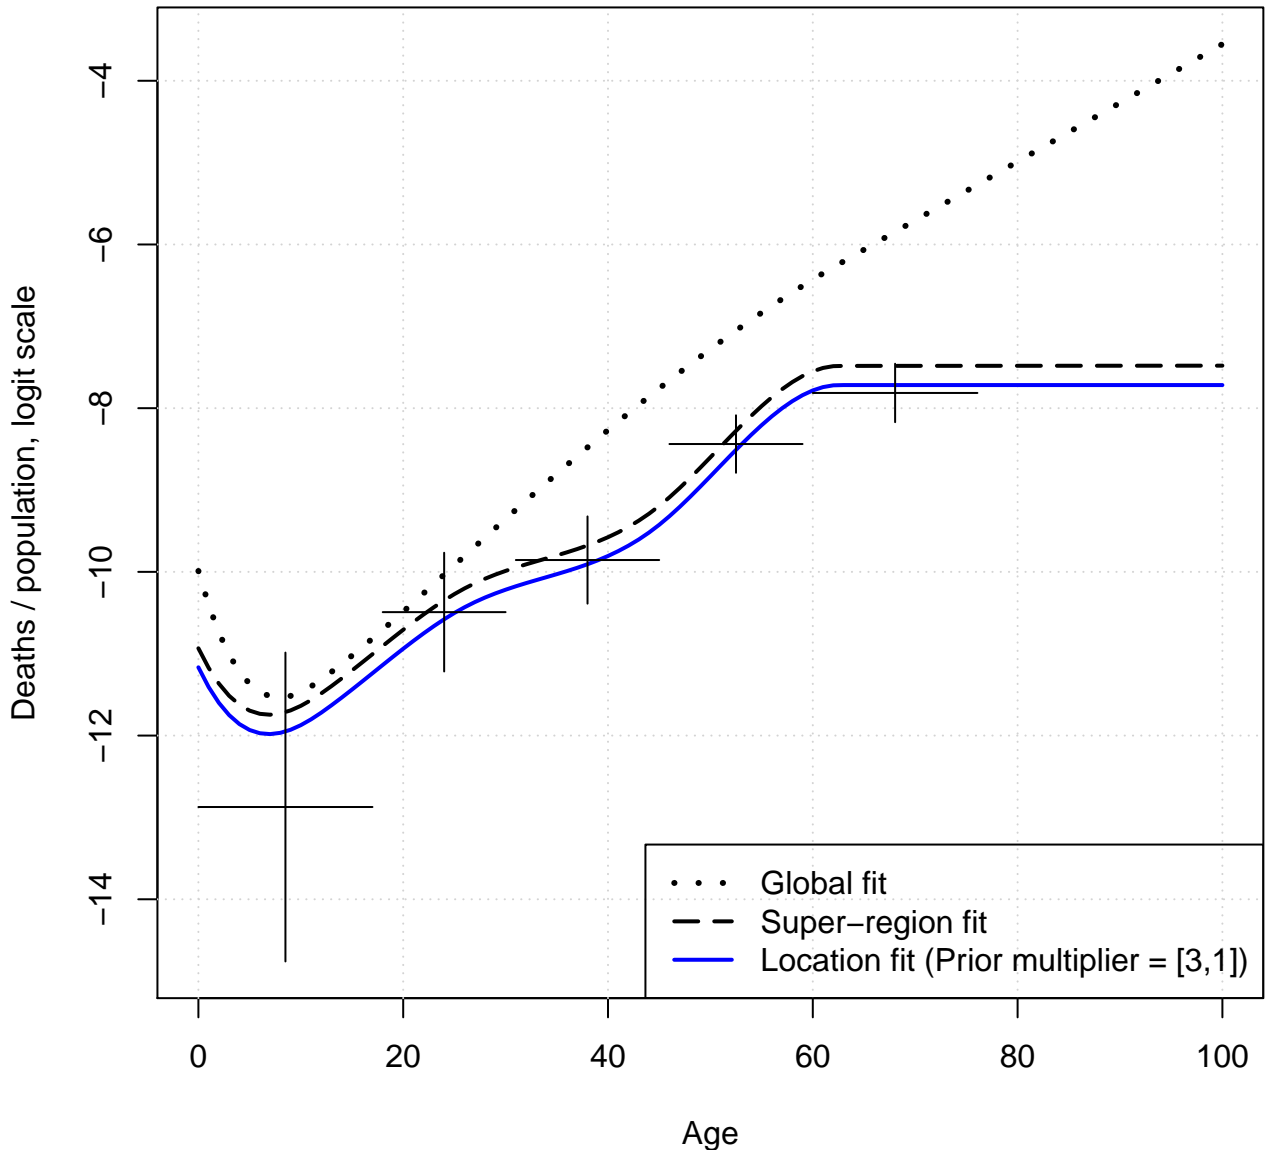

# West Papua

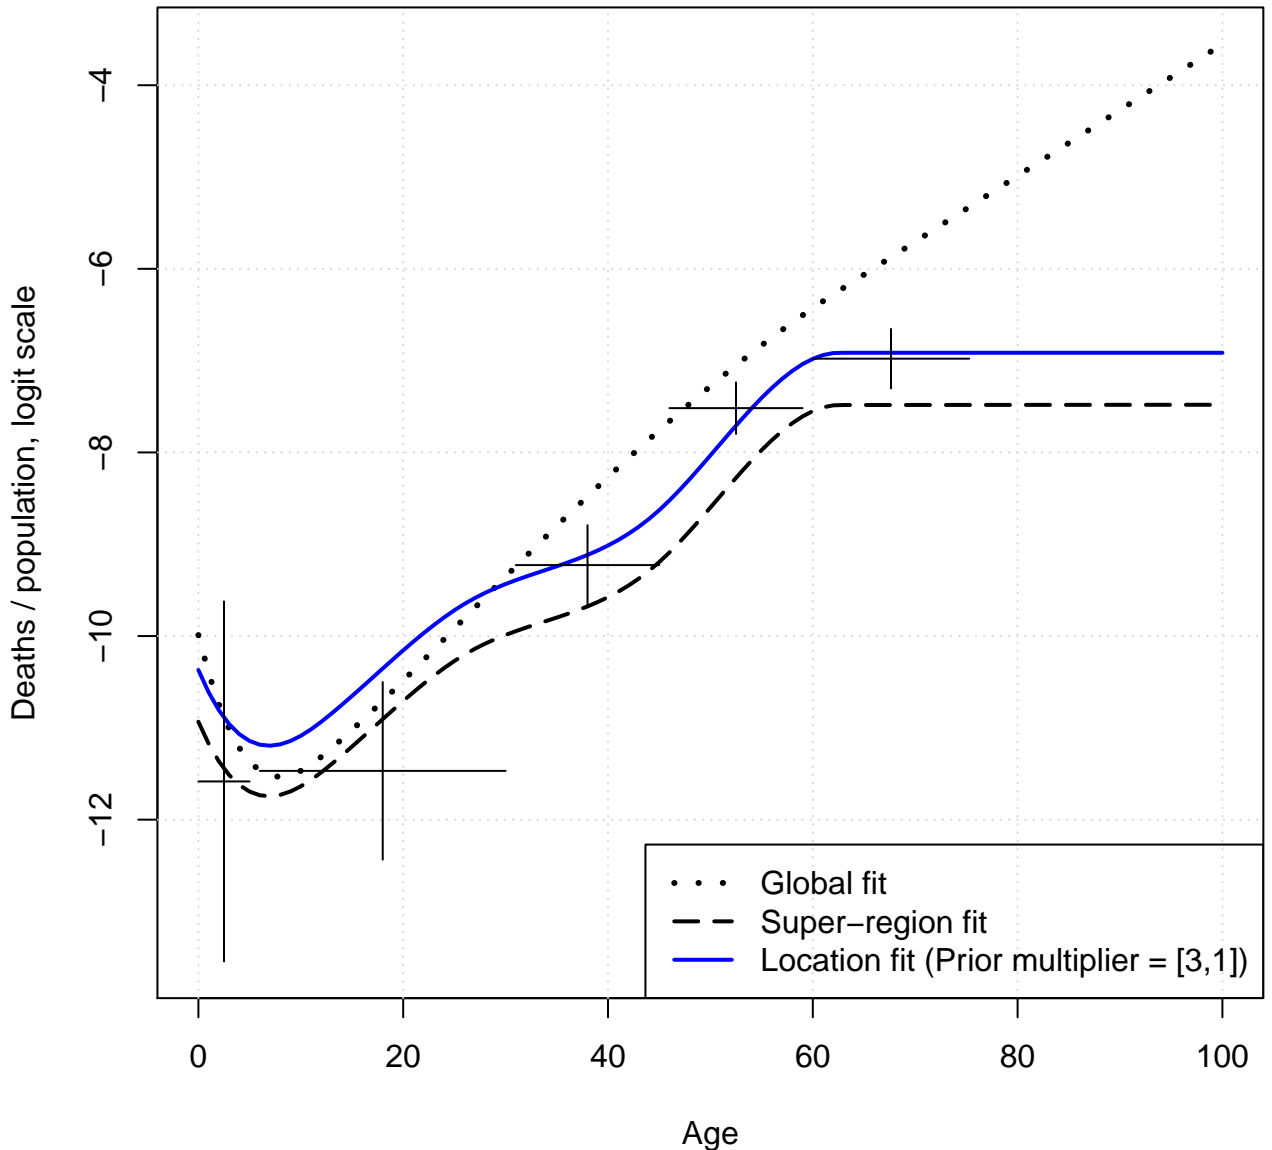

# Papua

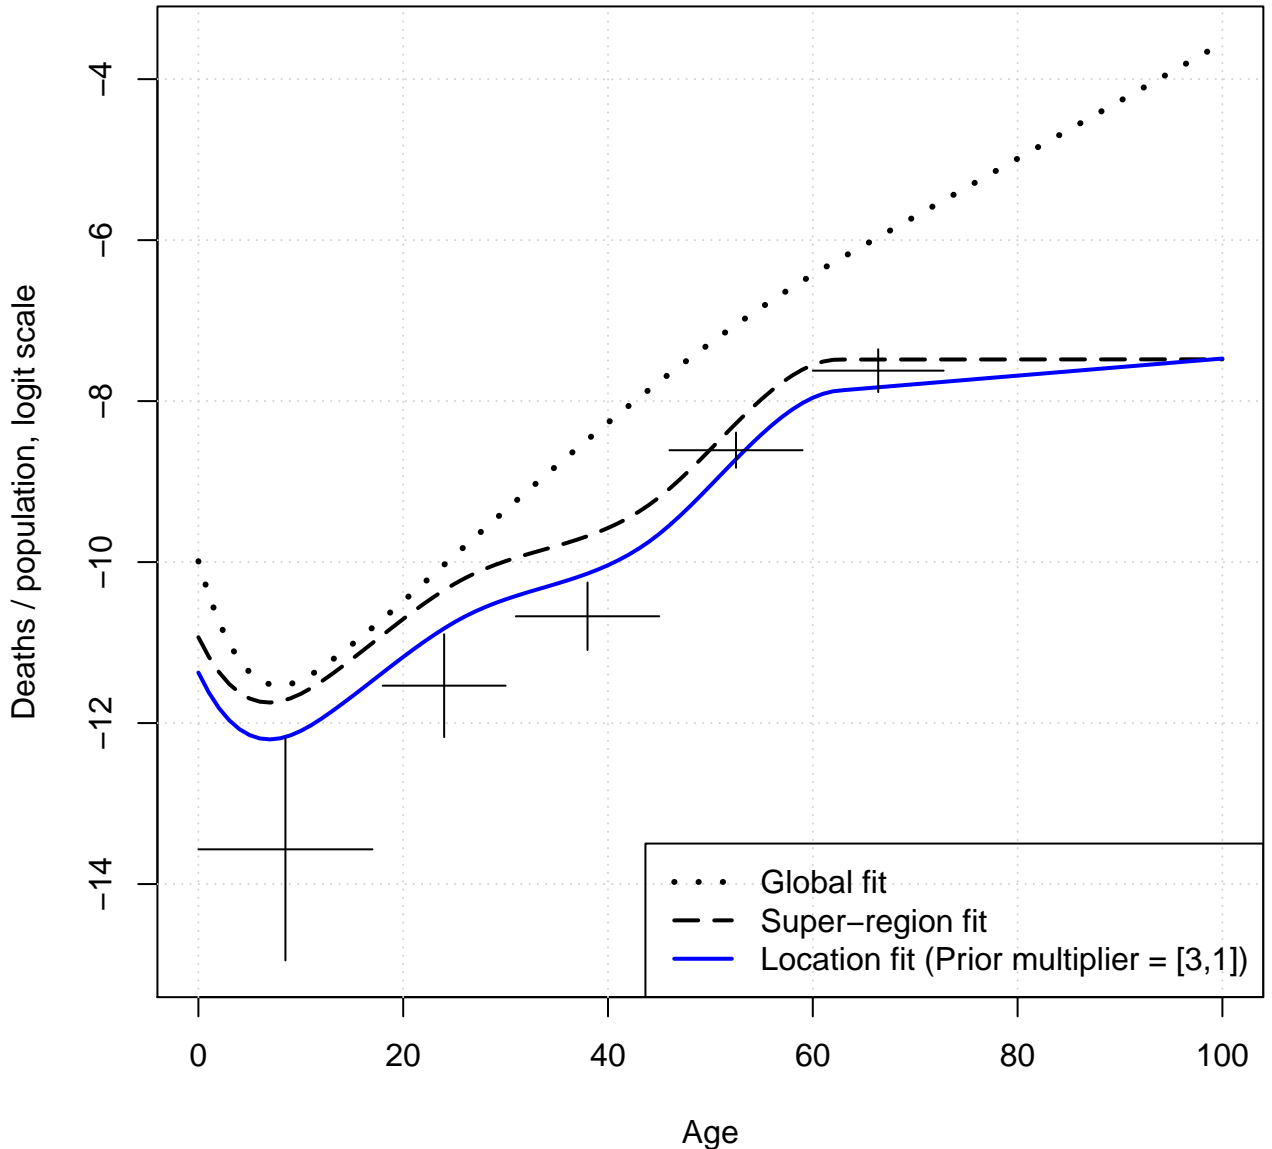



# England

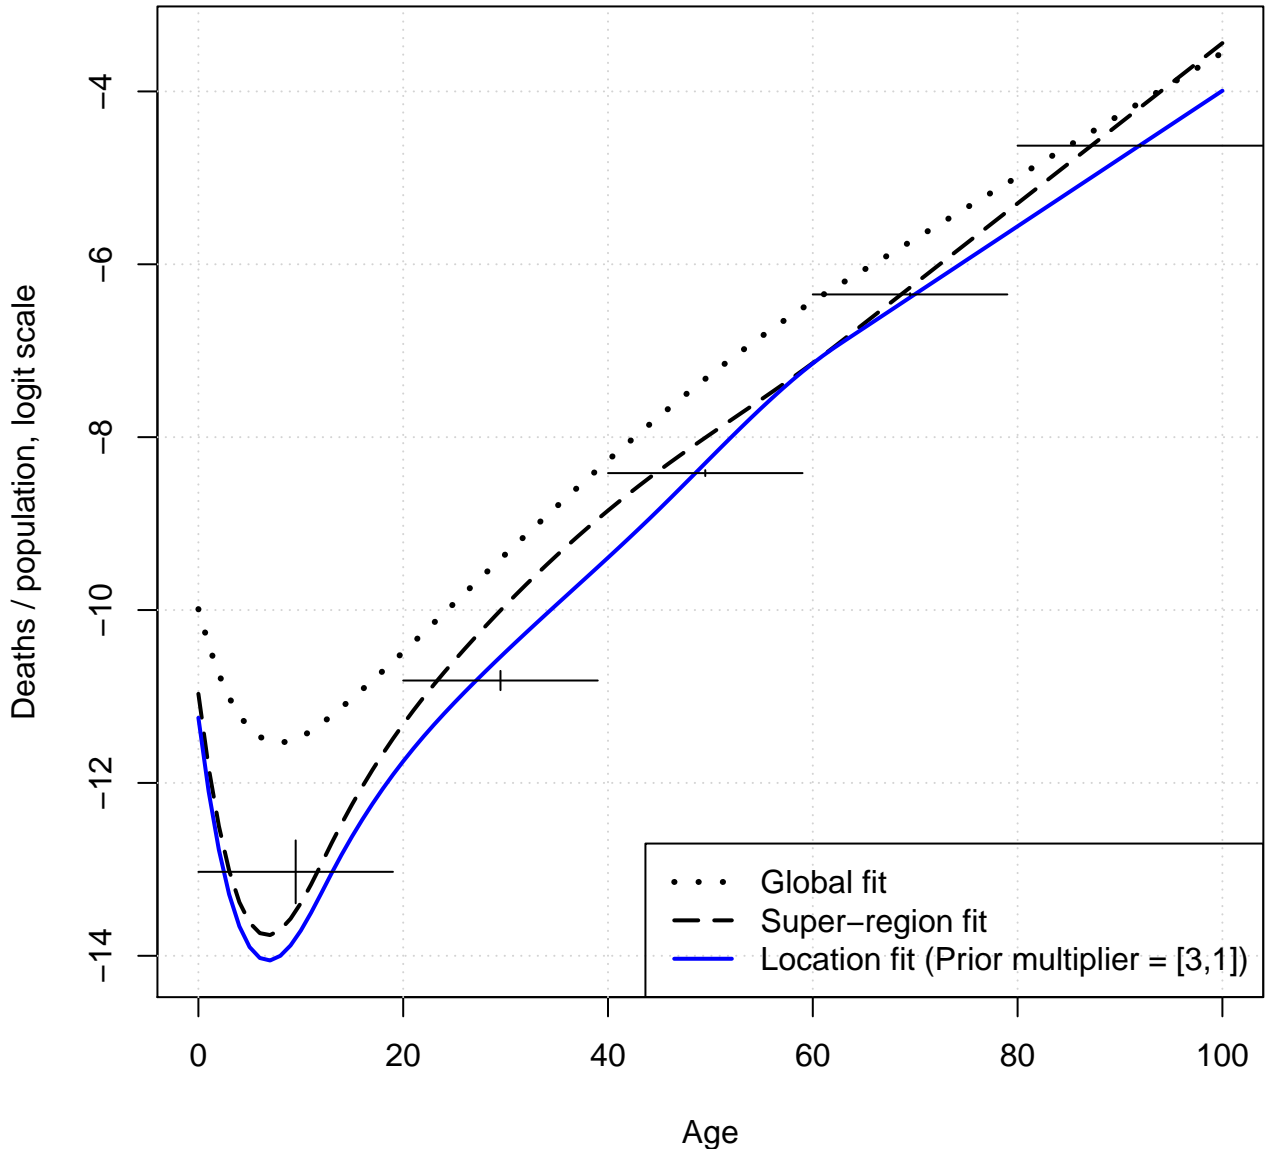

## Acre

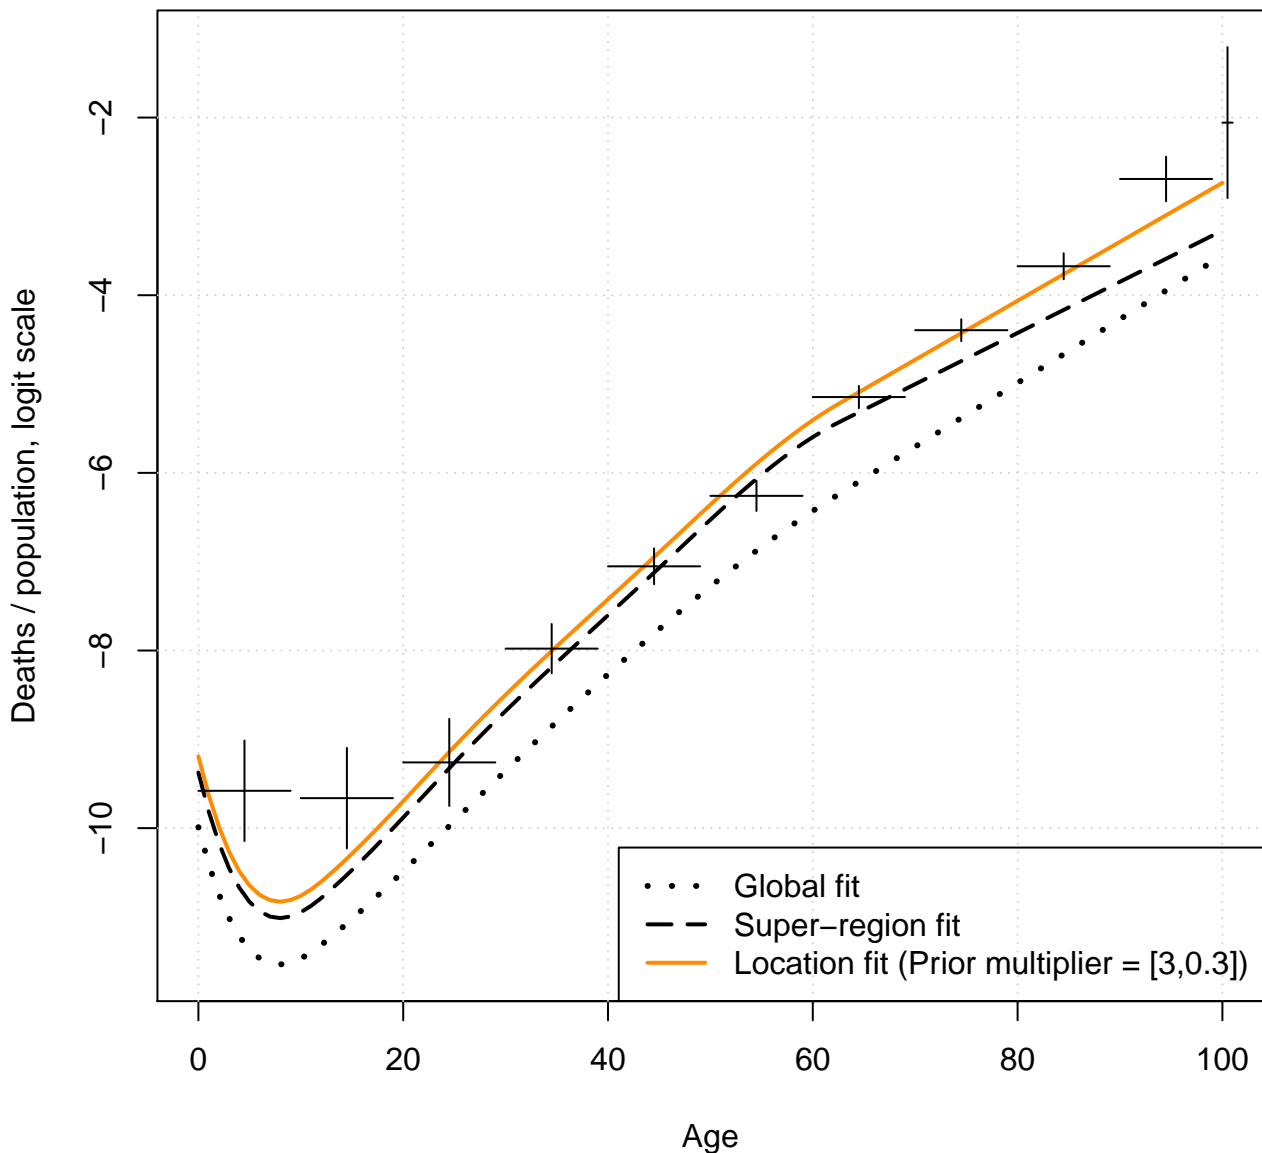

# Alagoas

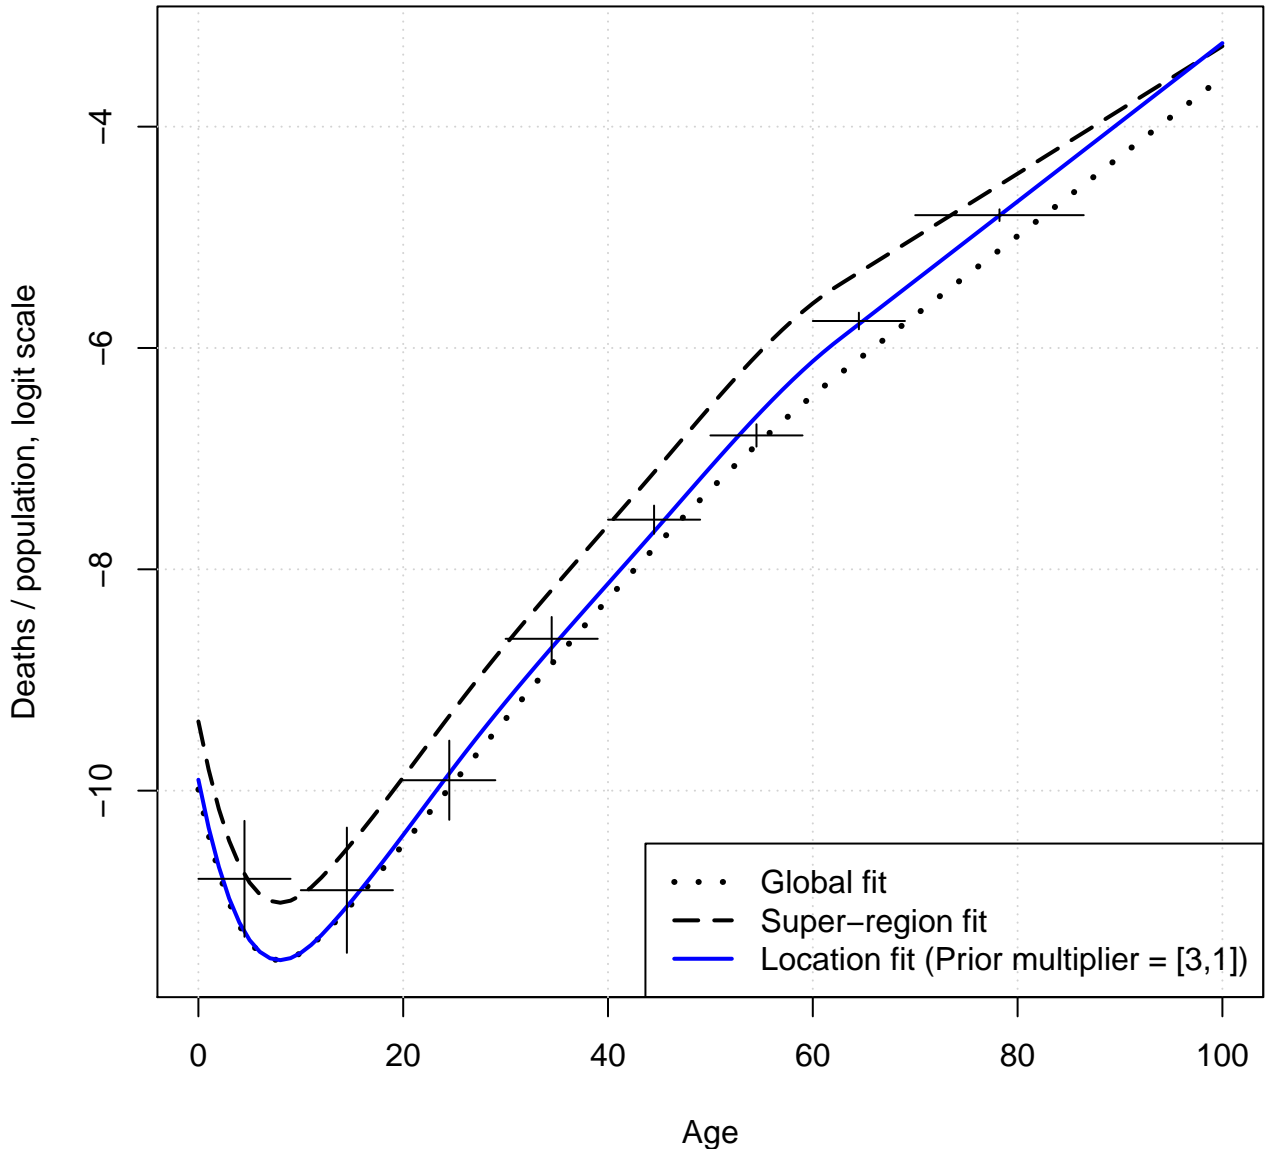

# Amazonas

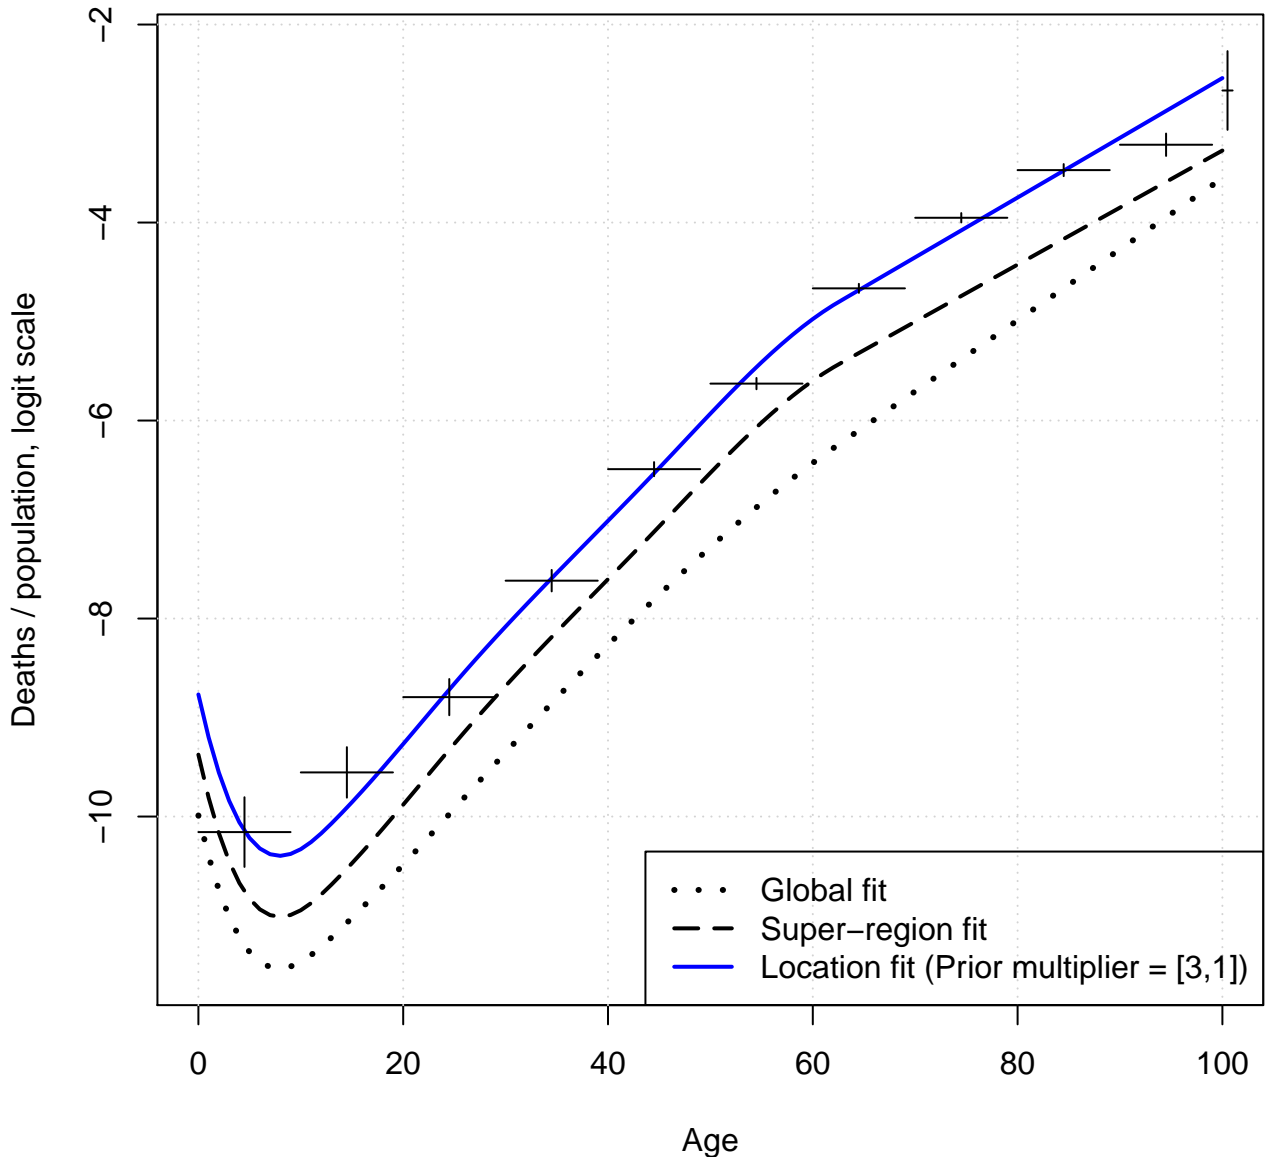

# Amapá

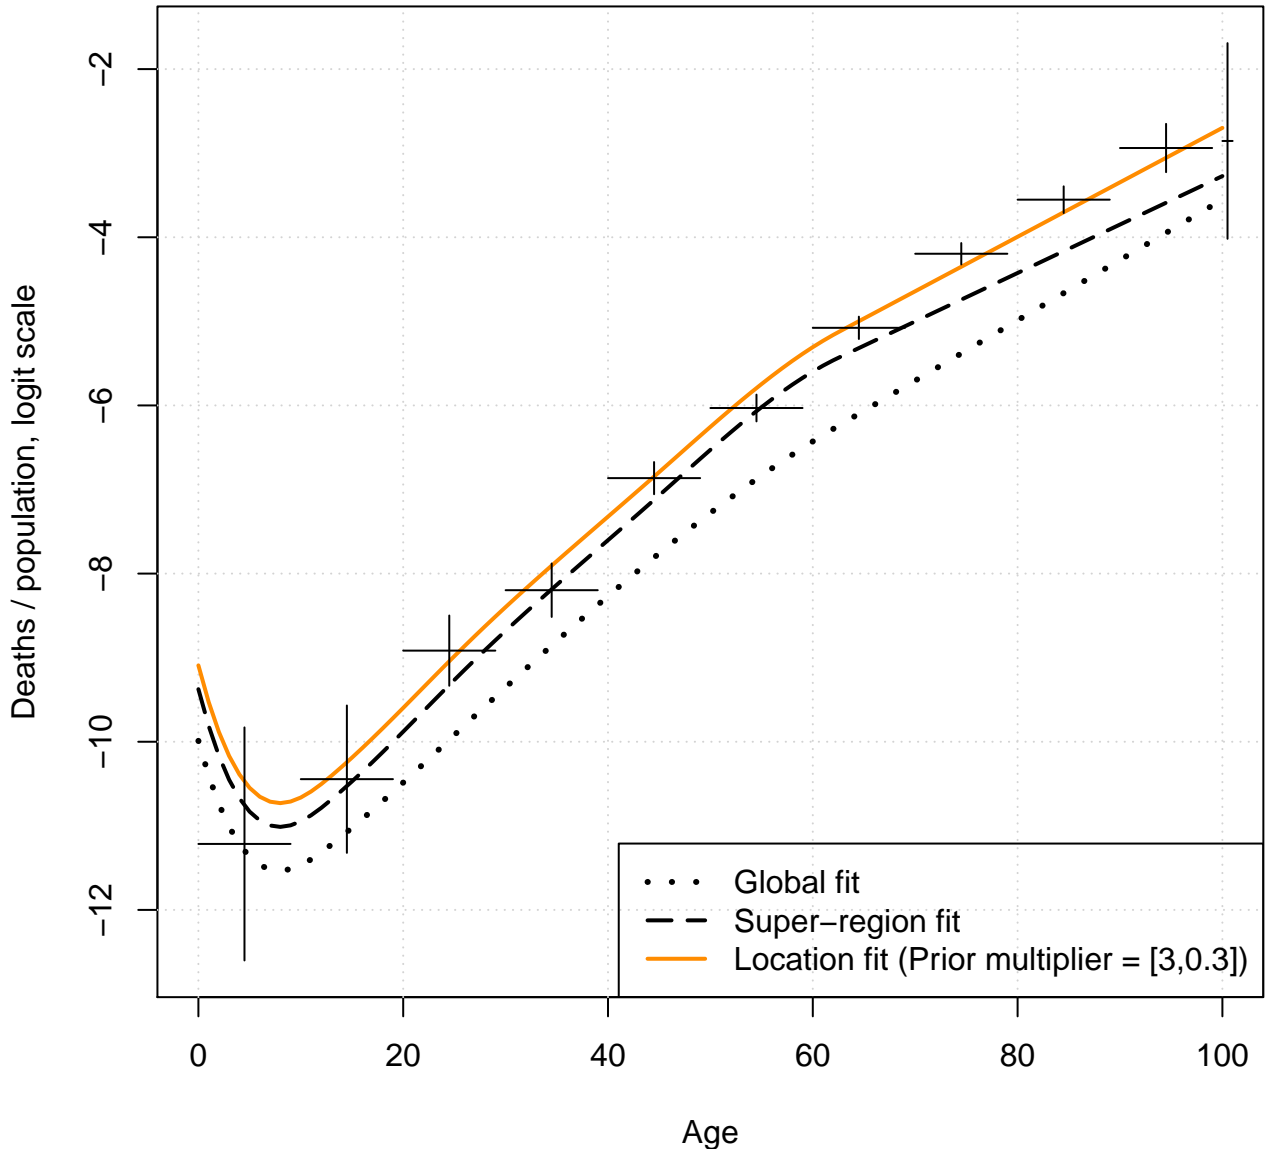

# Bahia

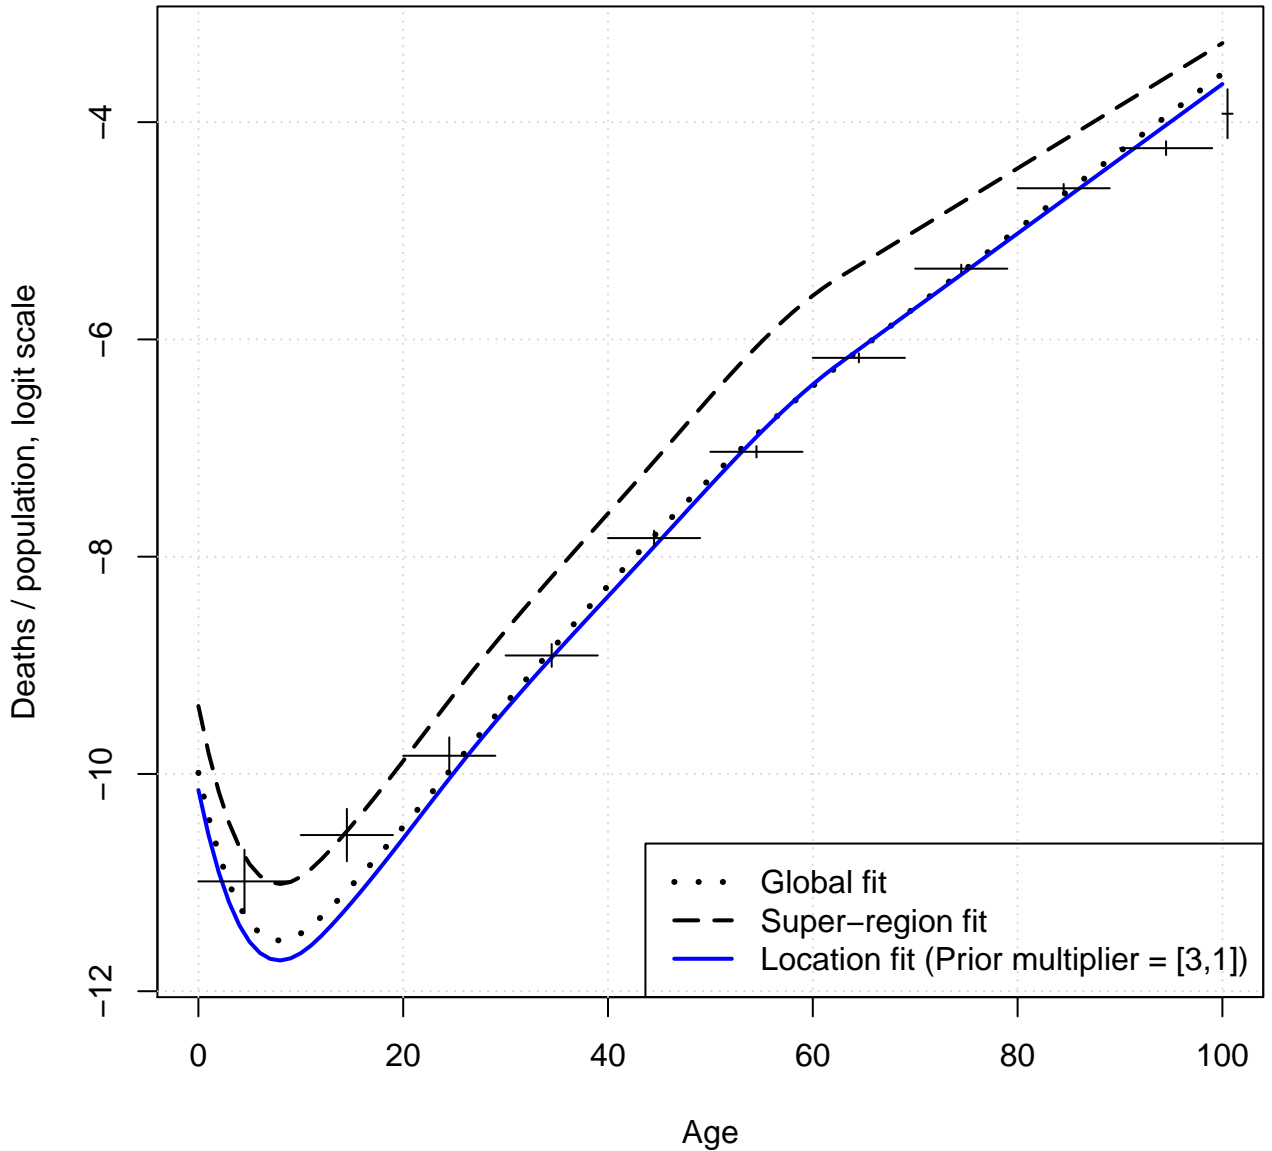

# Ceará

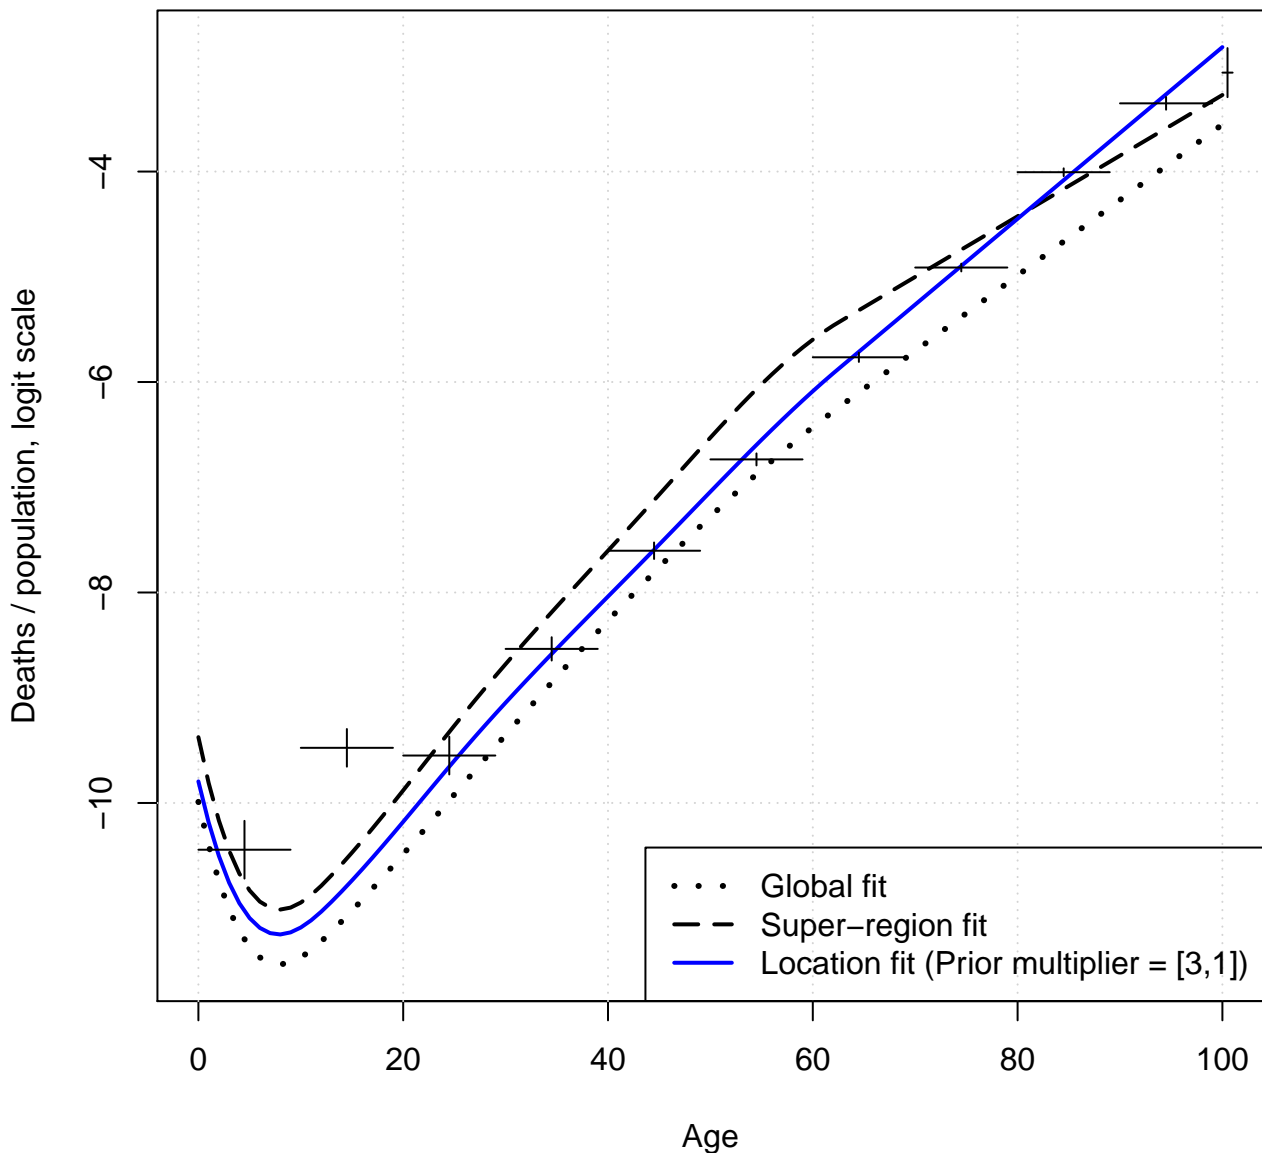

# Distrito Federal

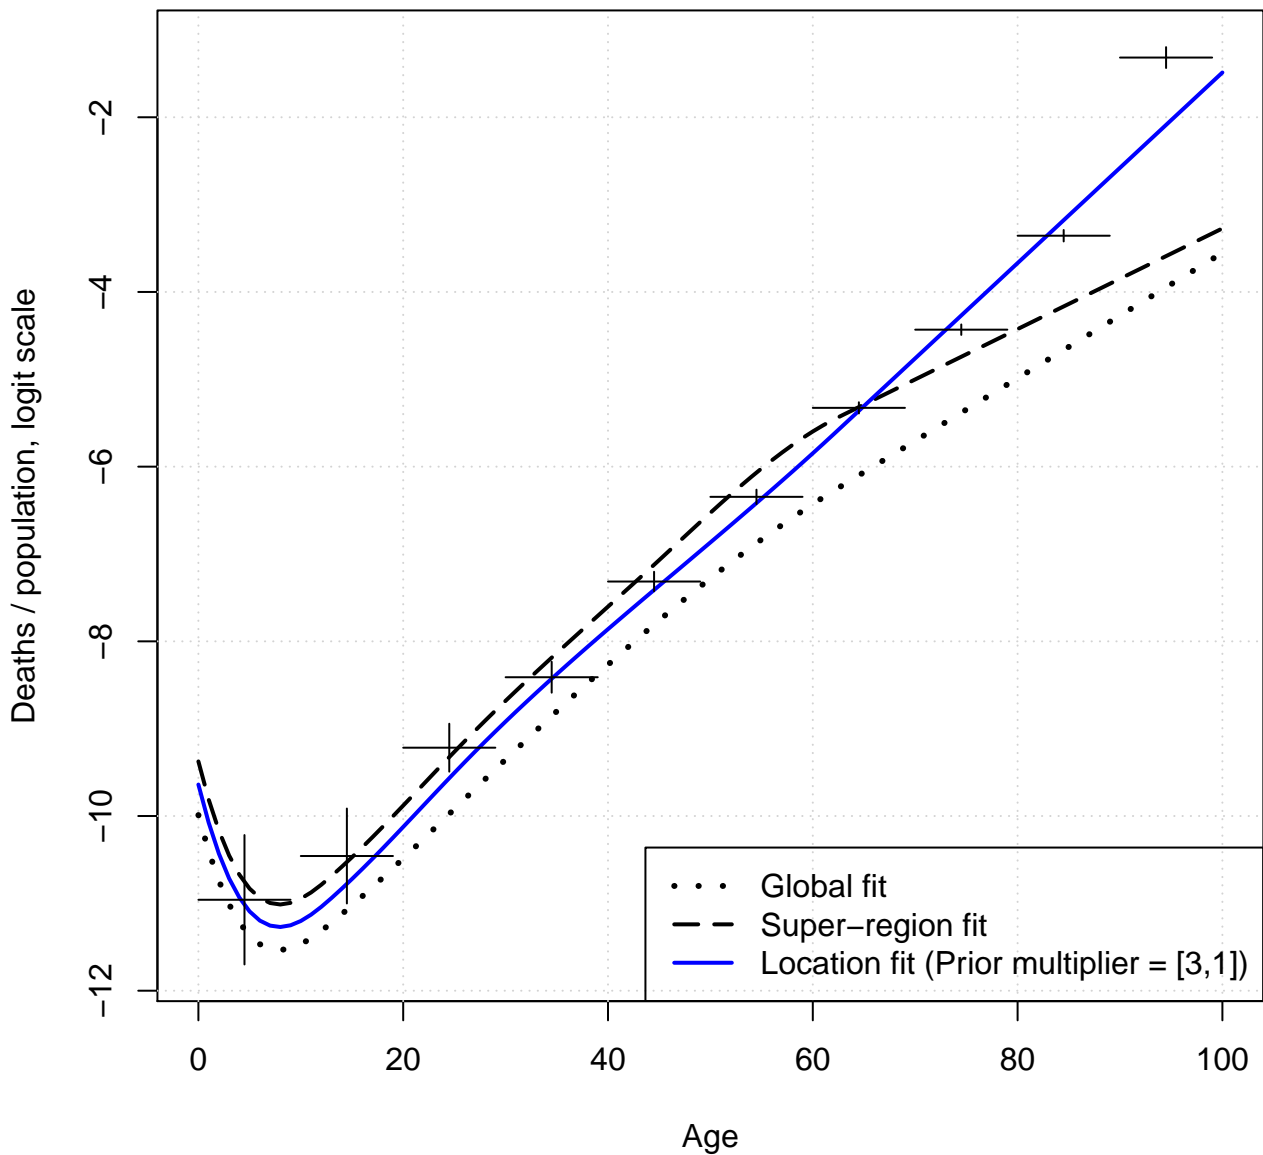



# Espírito Santo

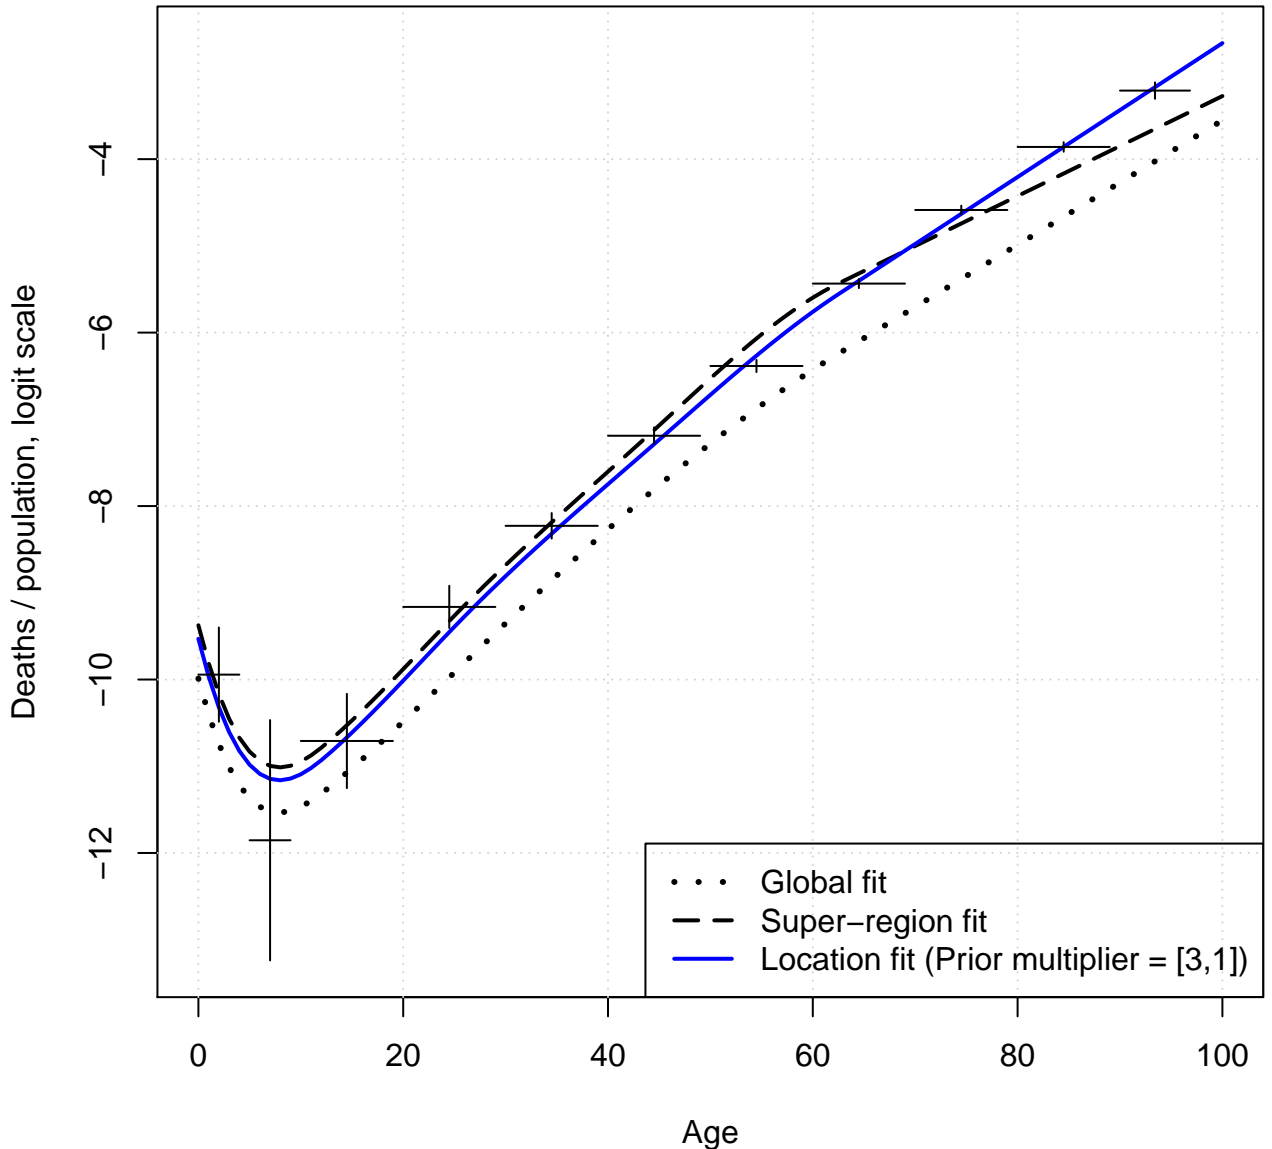

# Goiás

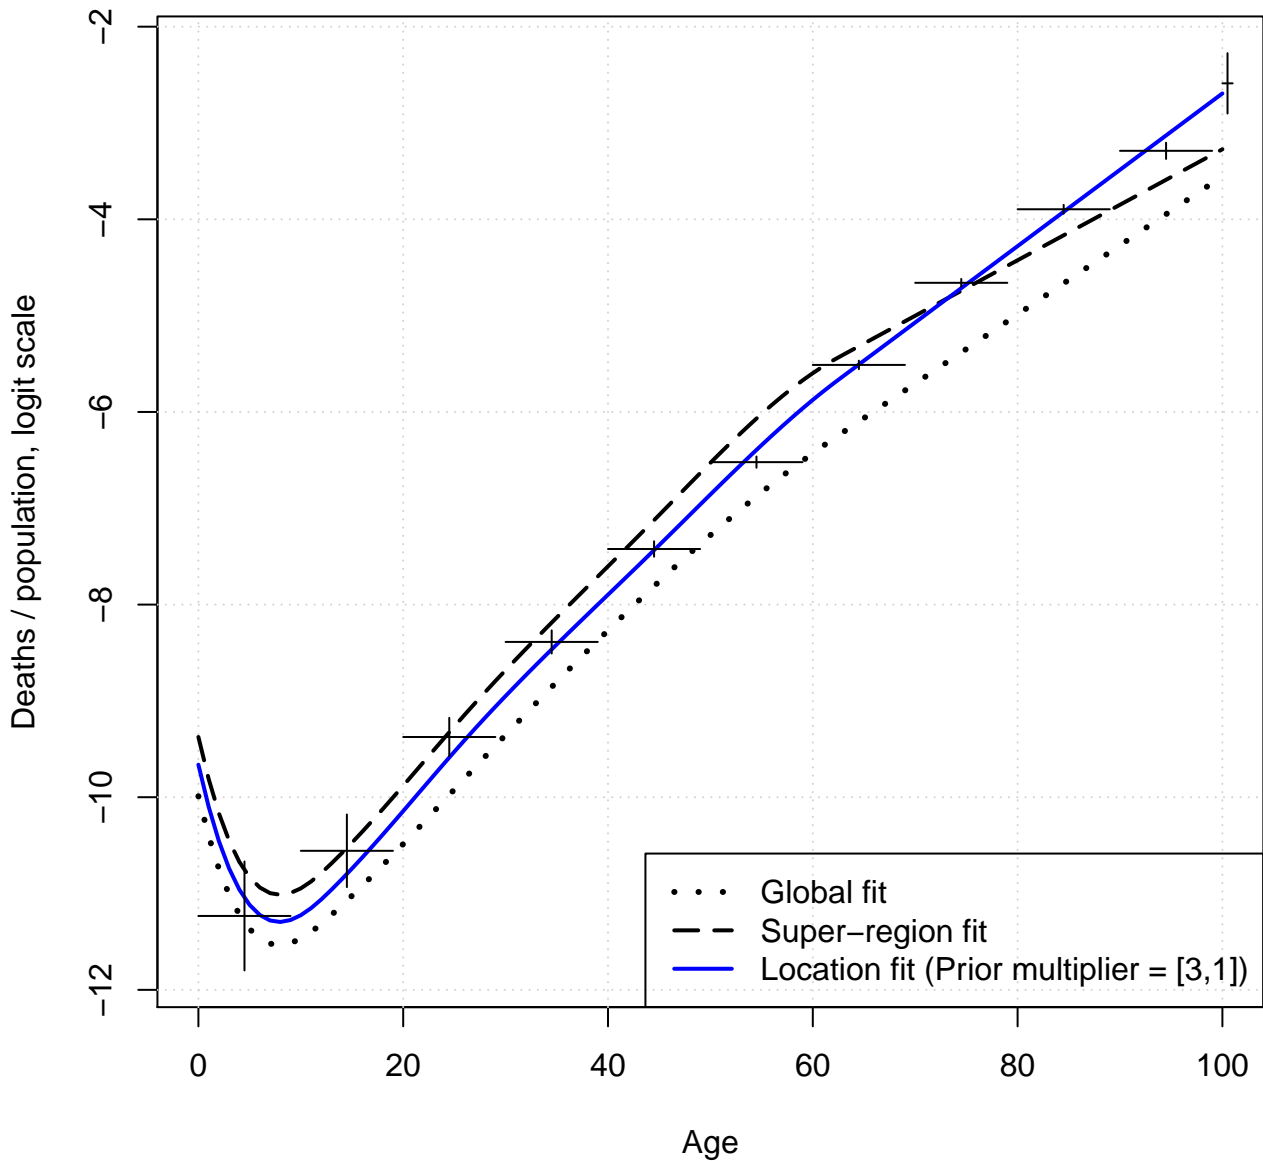

# Maranhão

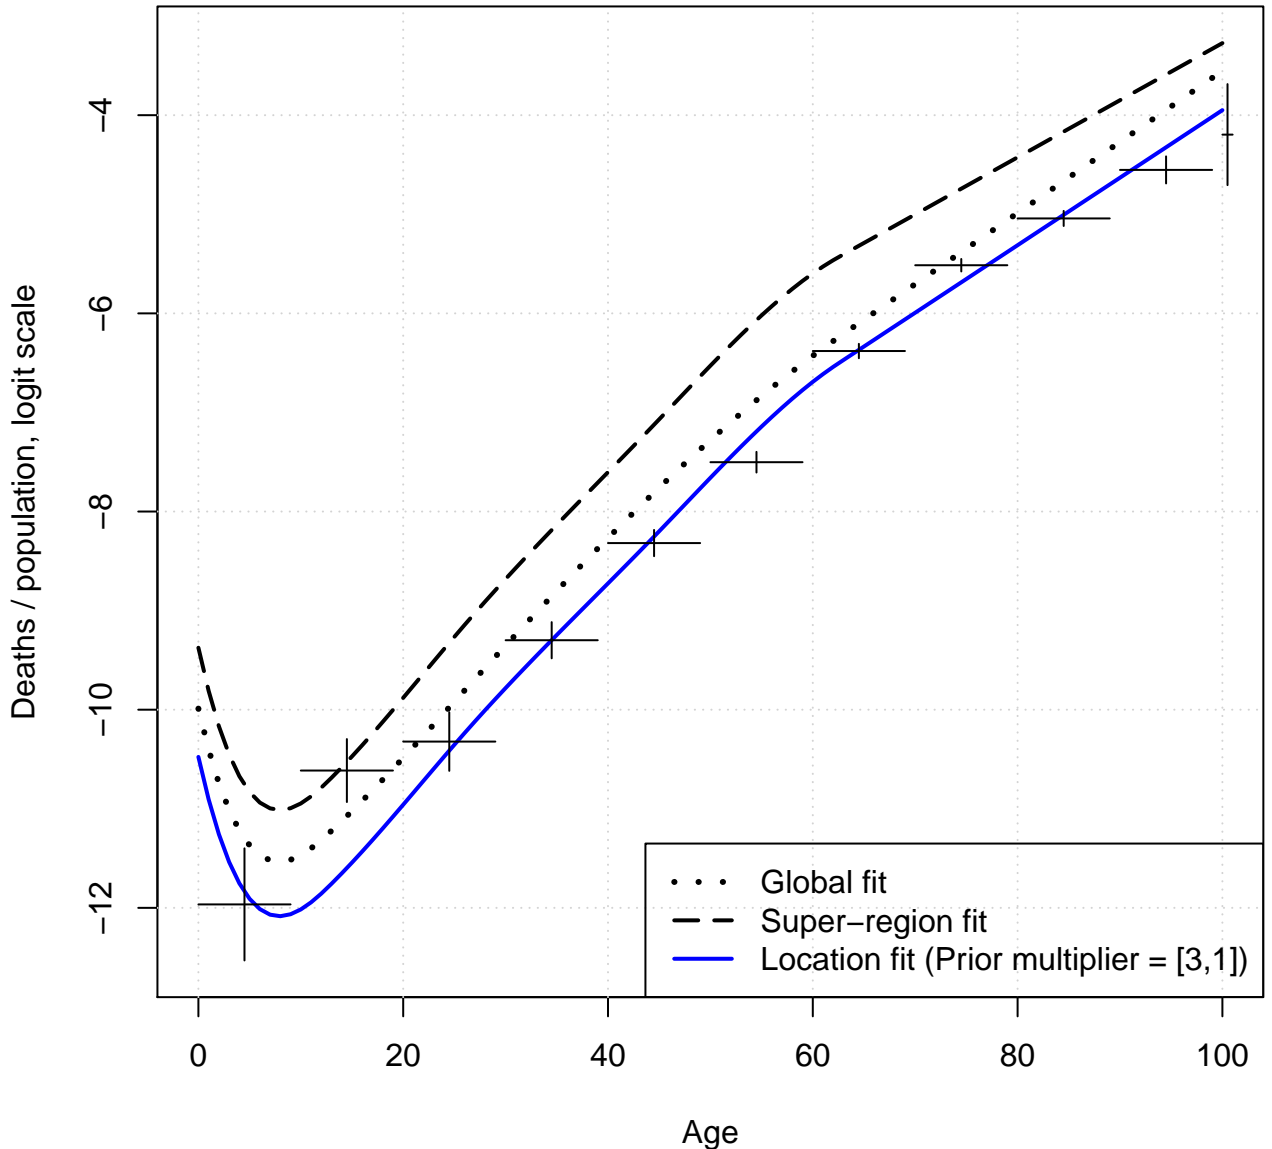

# Minas Gerais

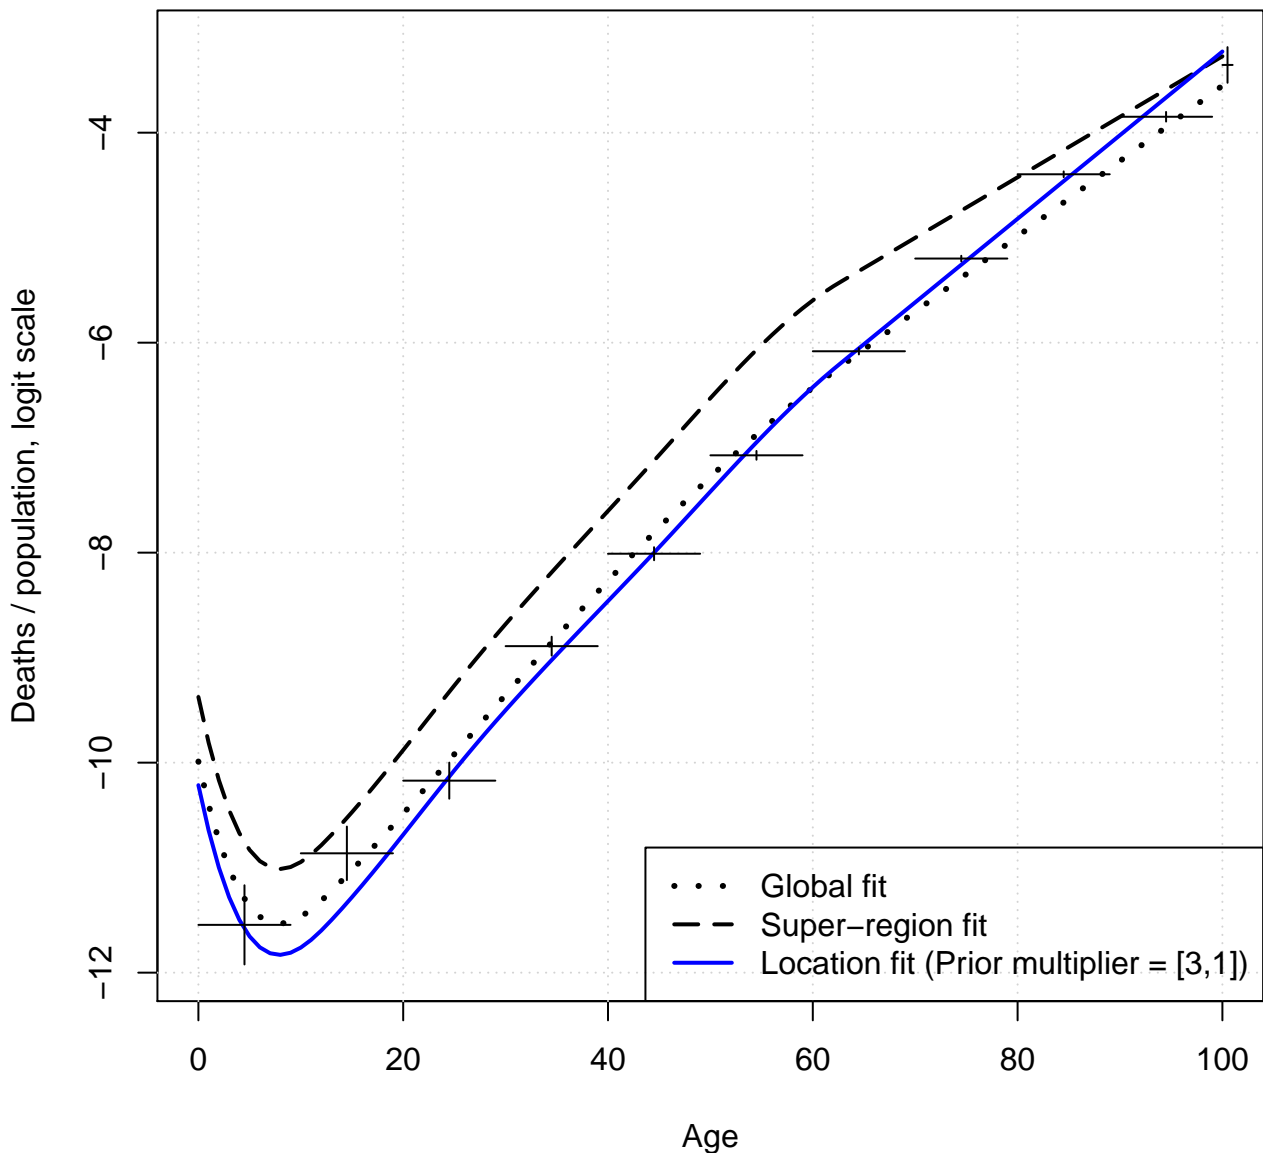

# Mato Grosso do Sul

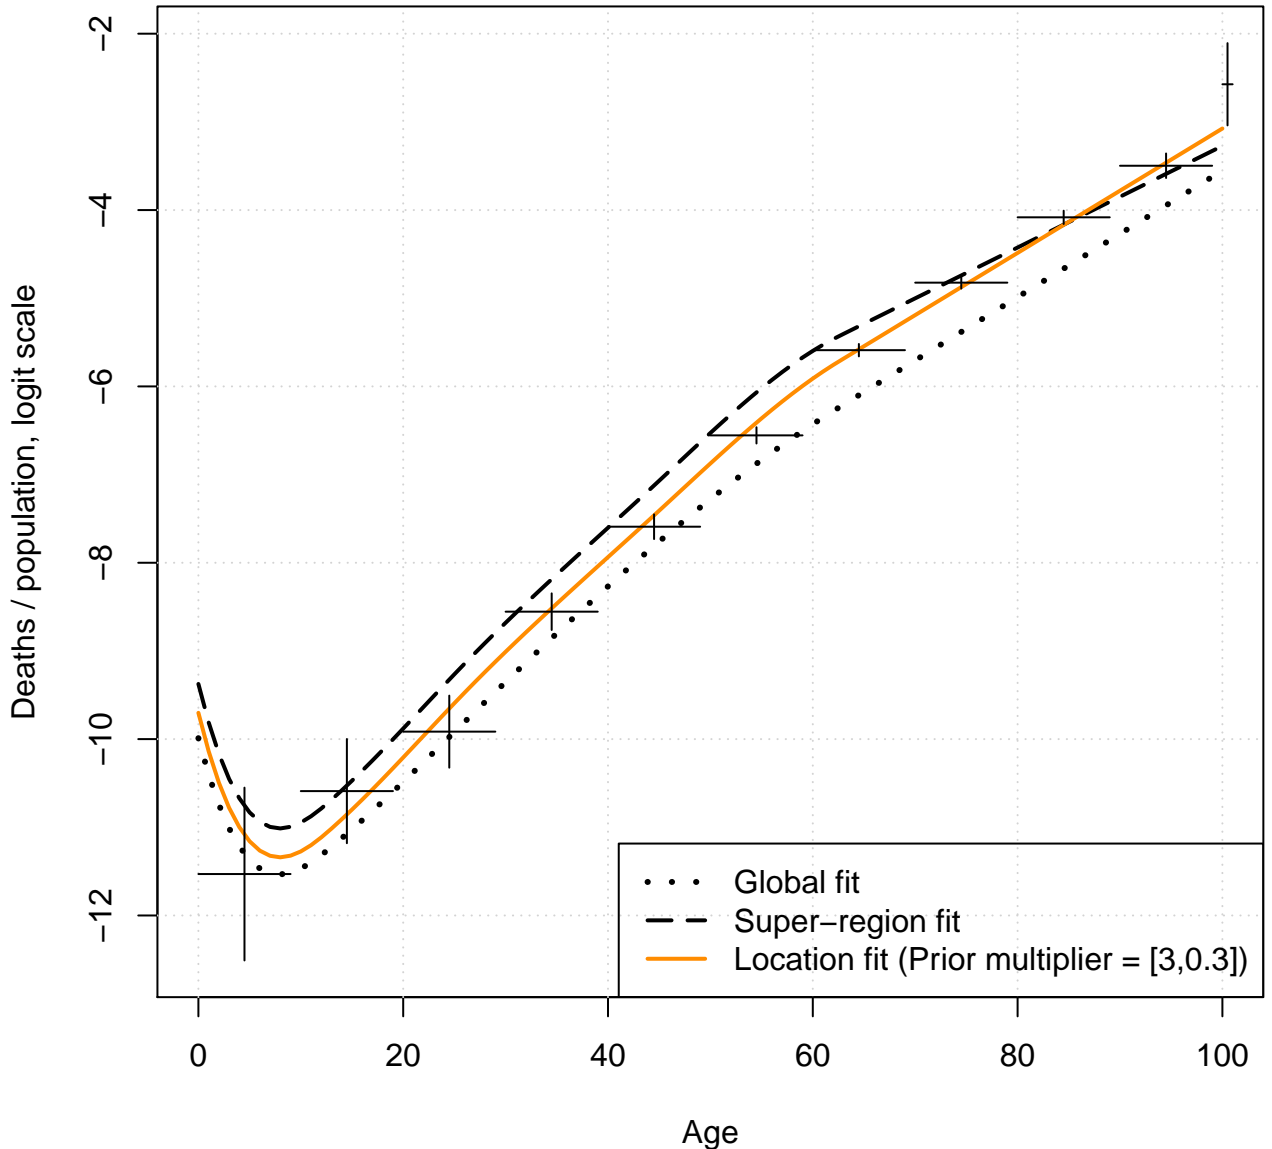

# Mato Grosso

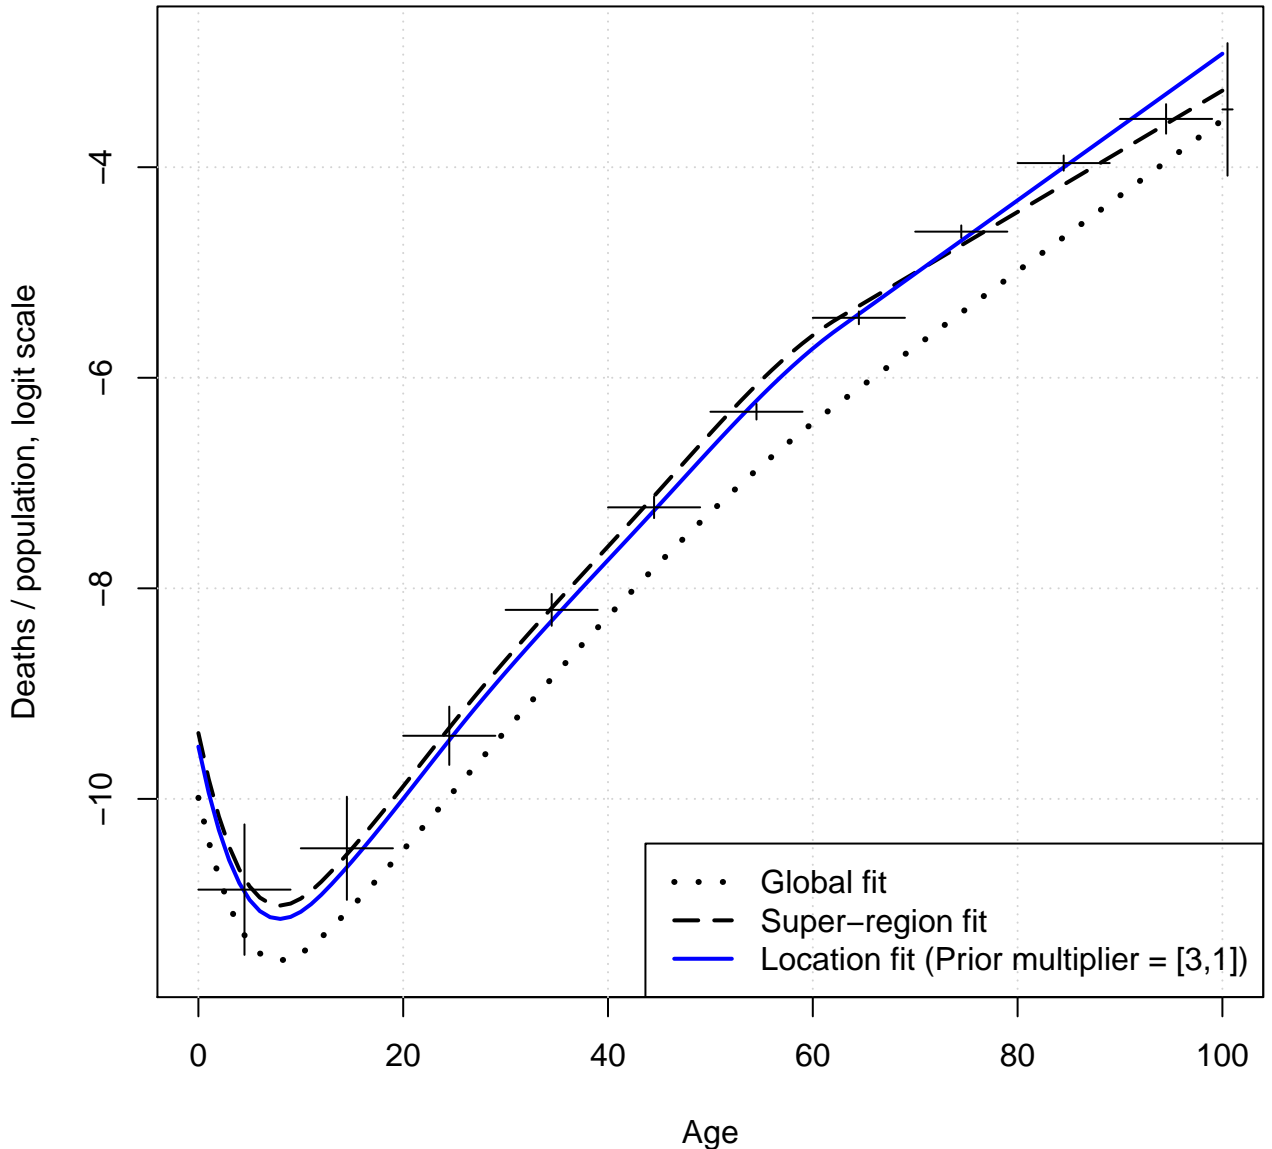

# Pará

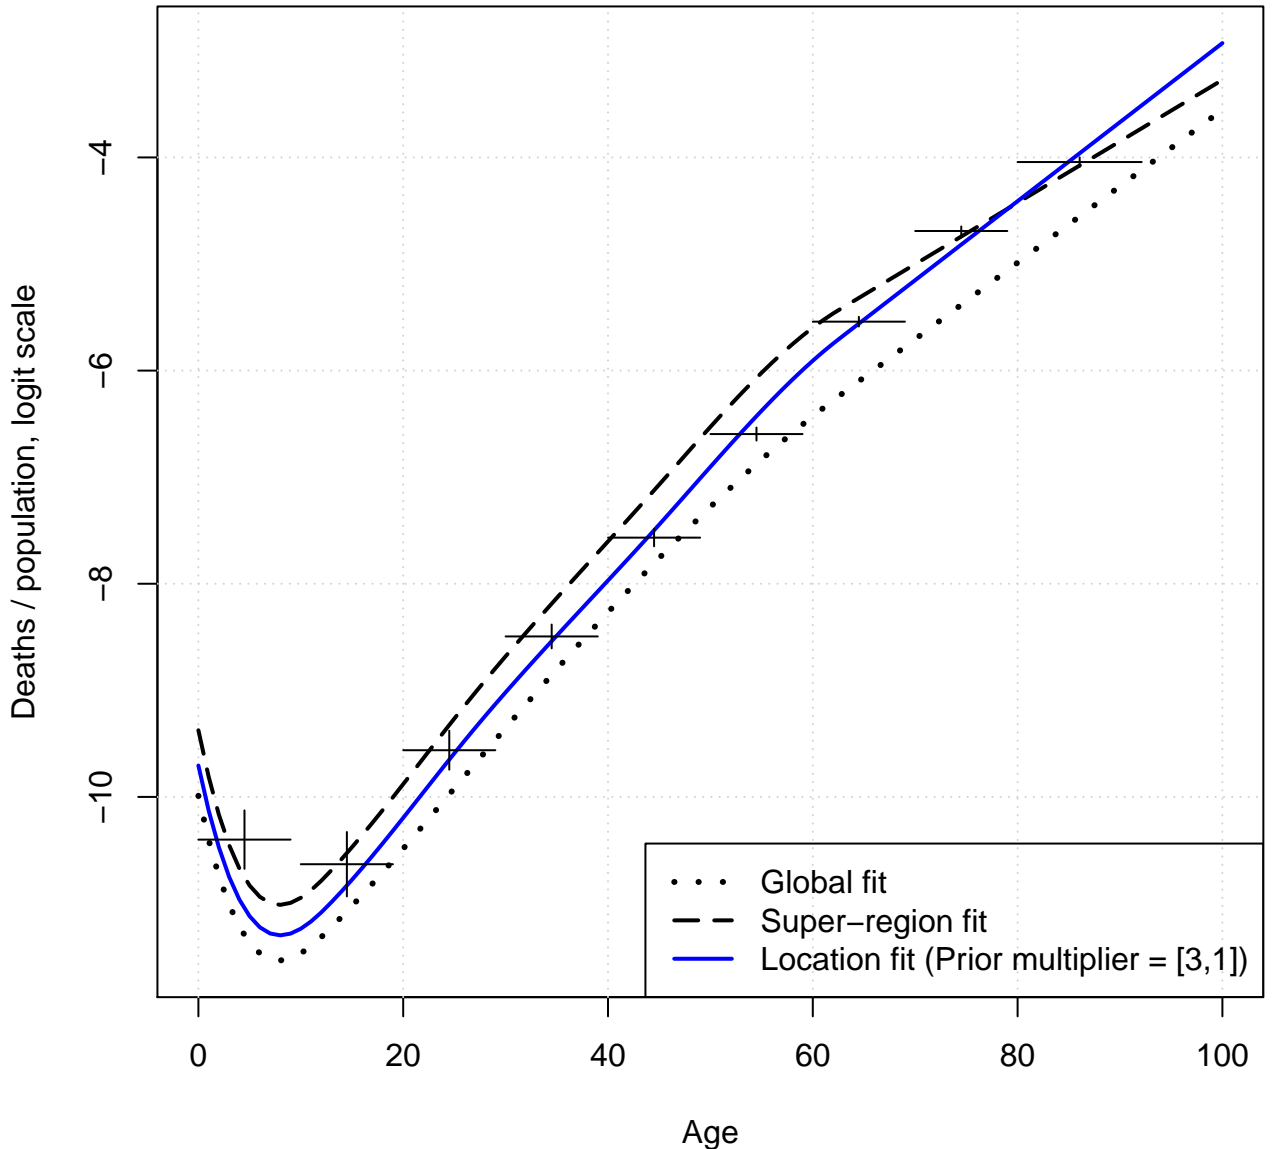

# Paraíba

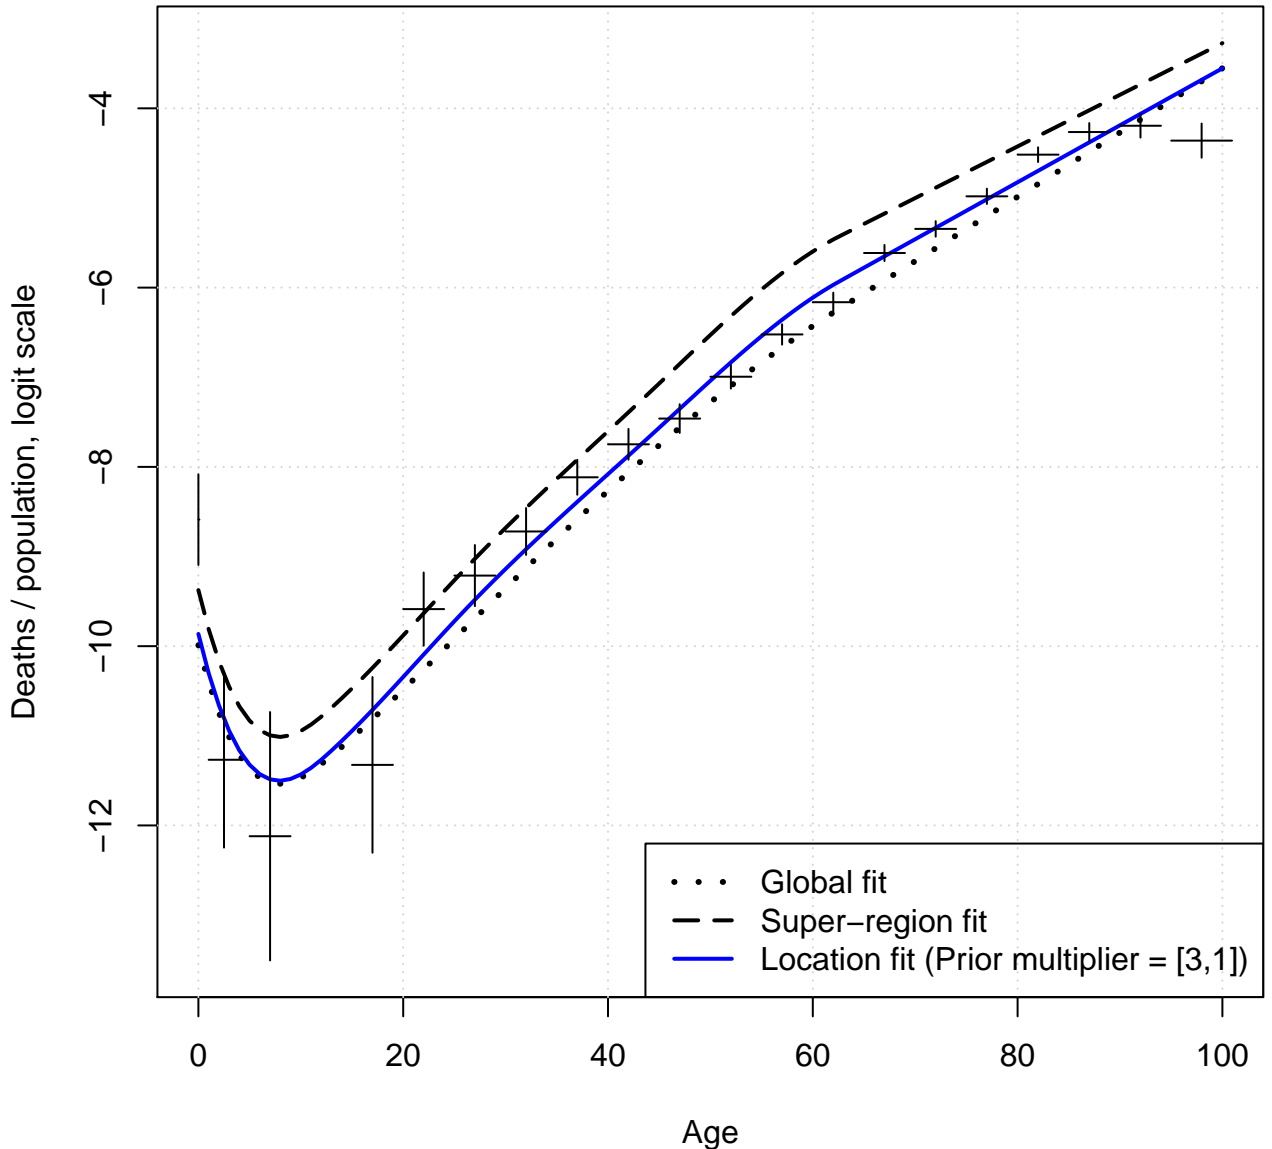



# Paraná

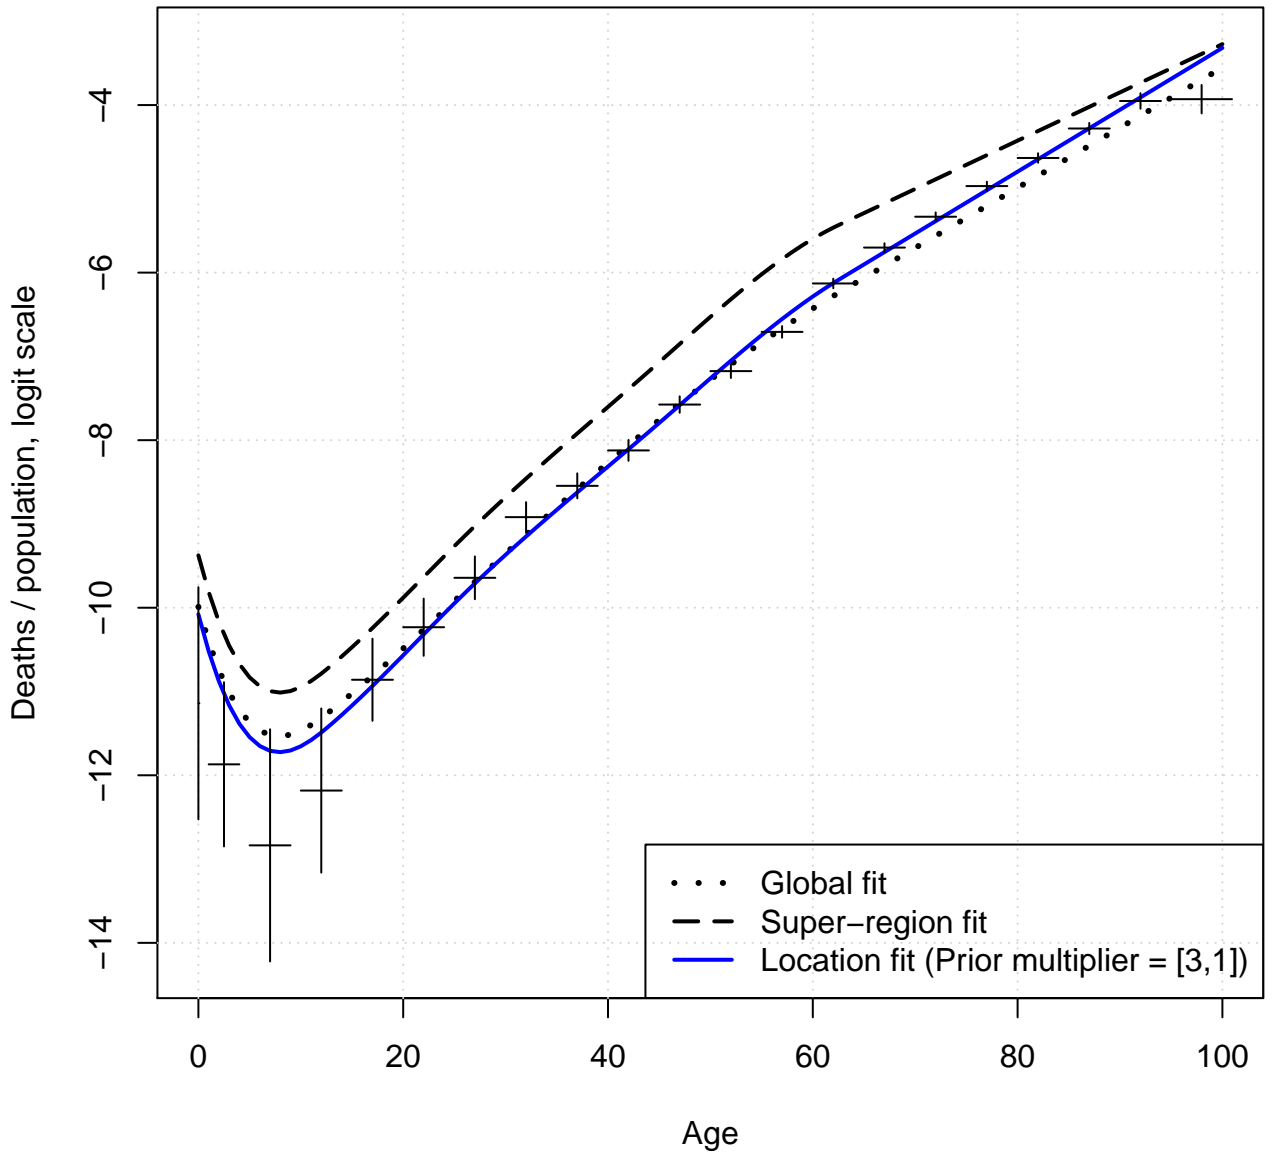

# Pernambuco

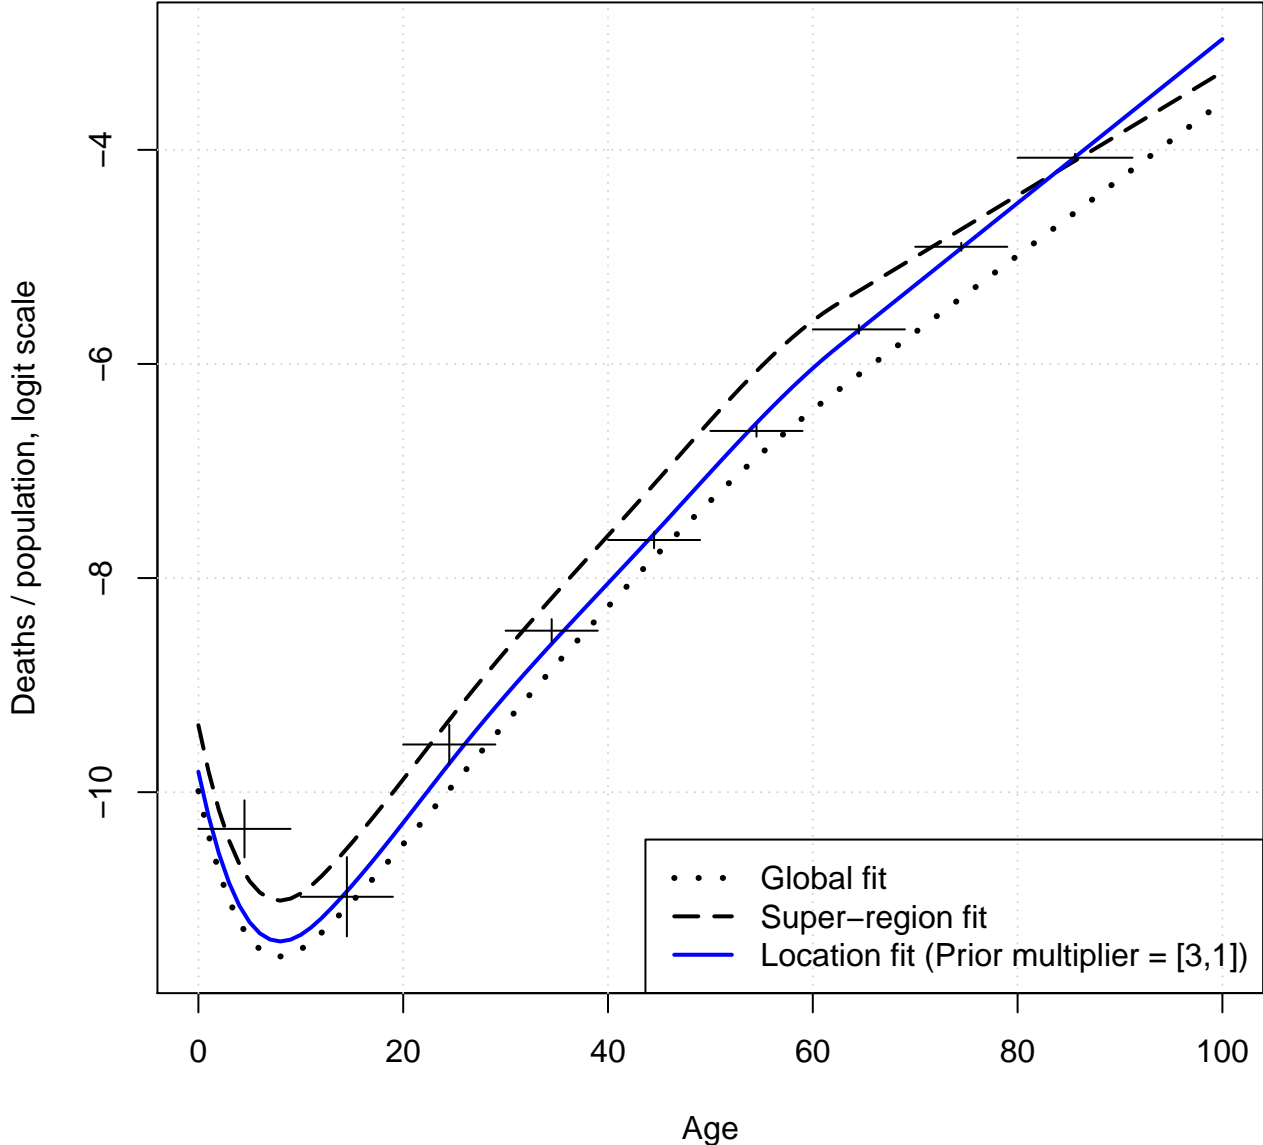

# Piaui

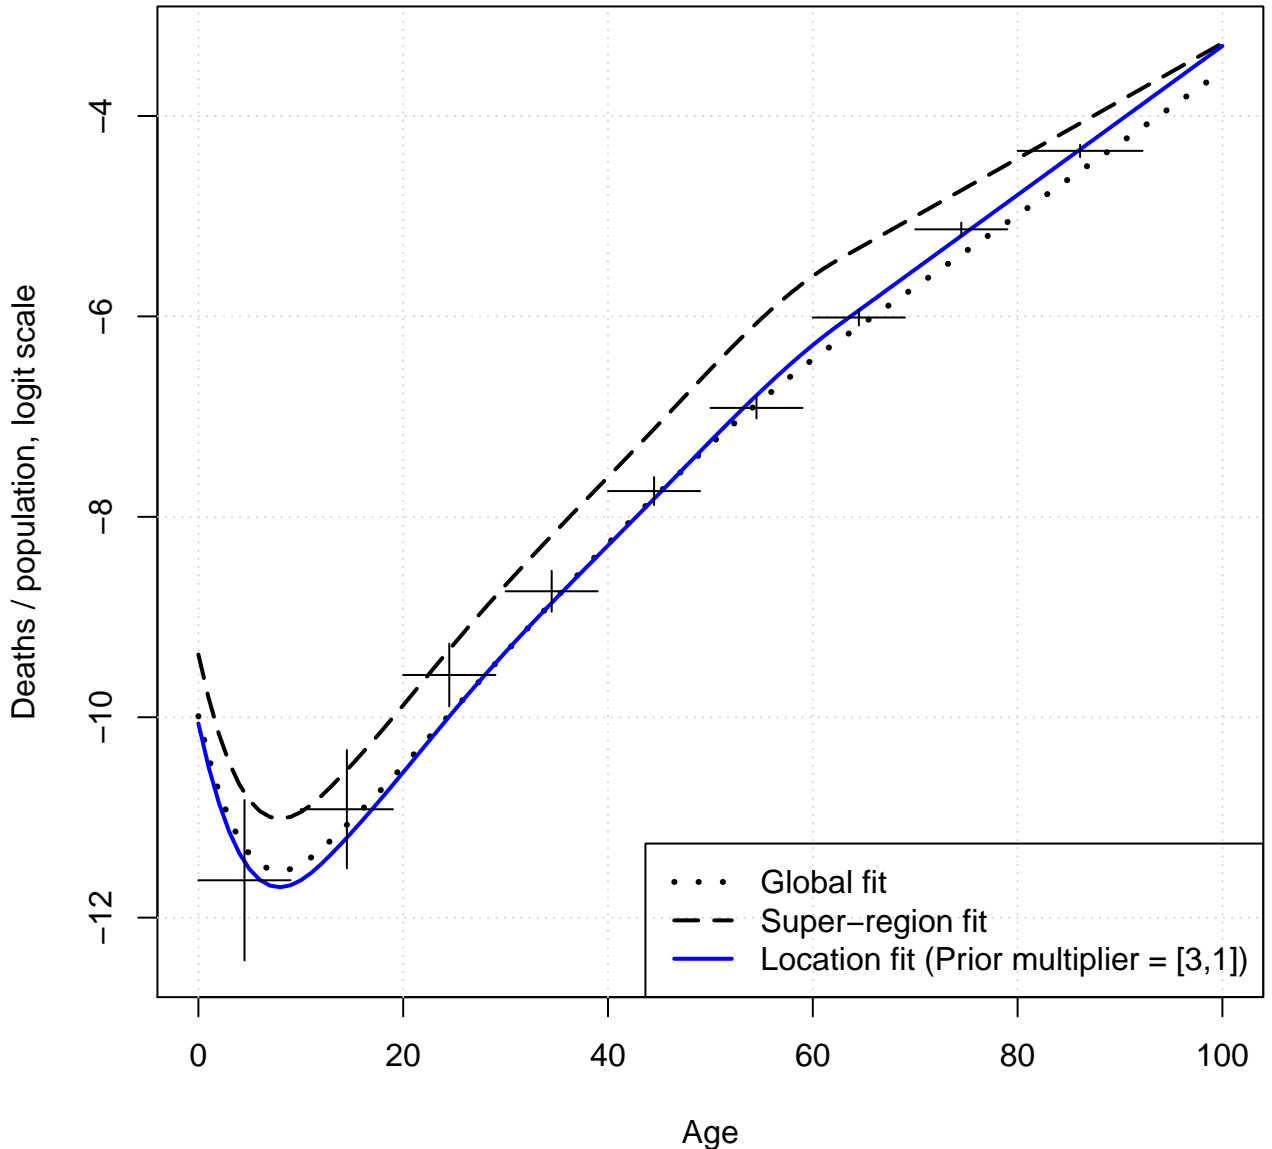

# Rio de Janeiro

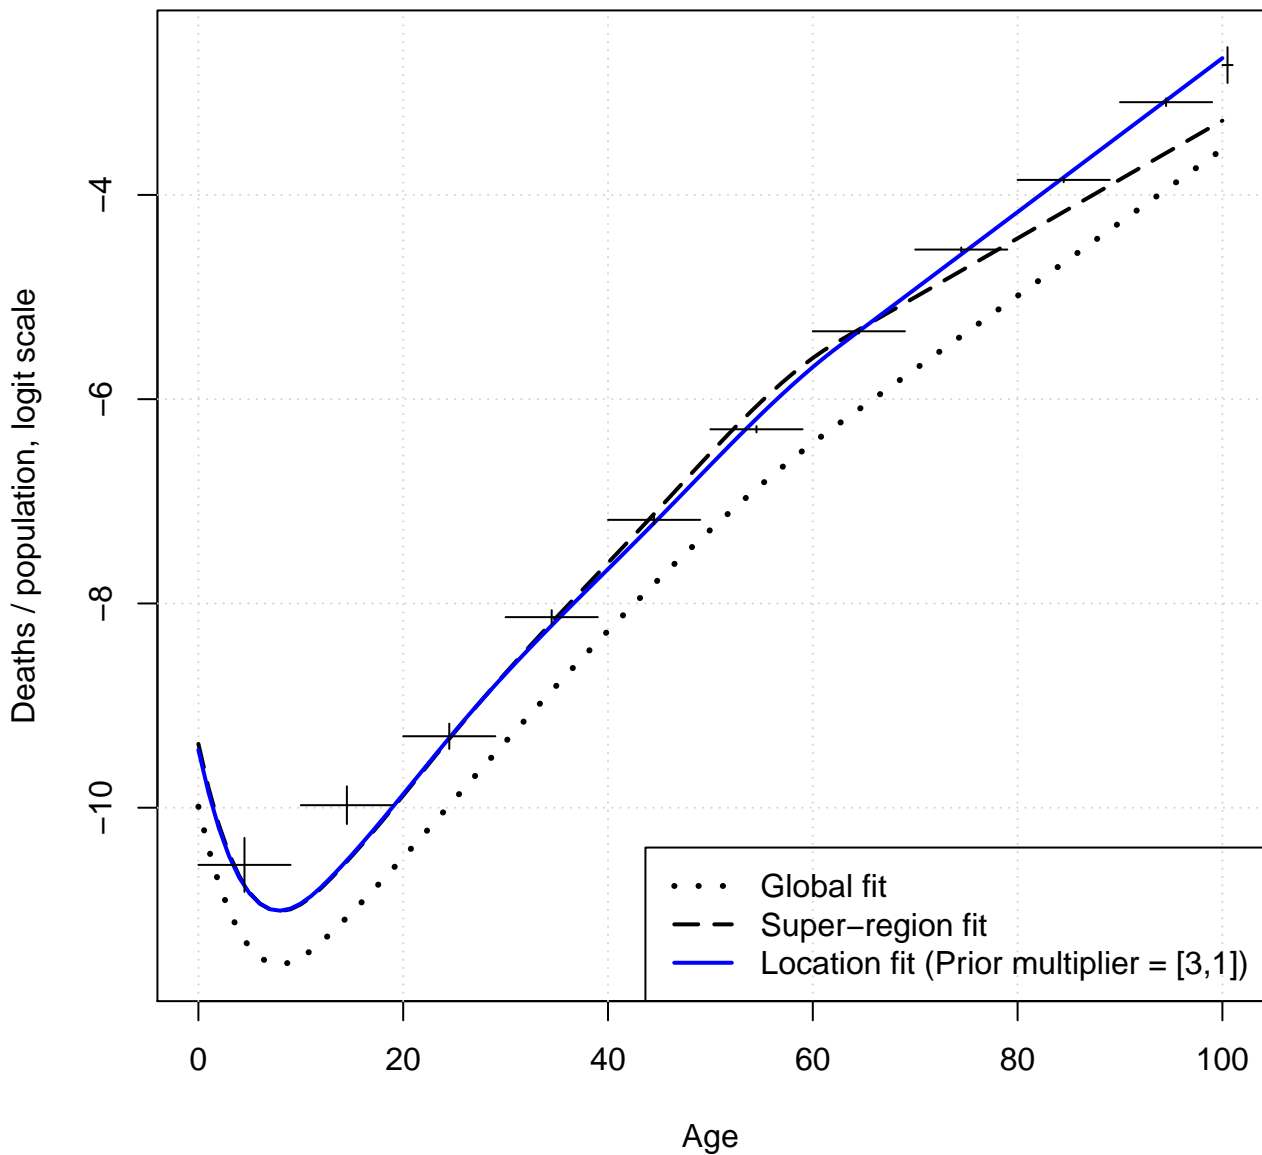

# Rio Grande do Norte

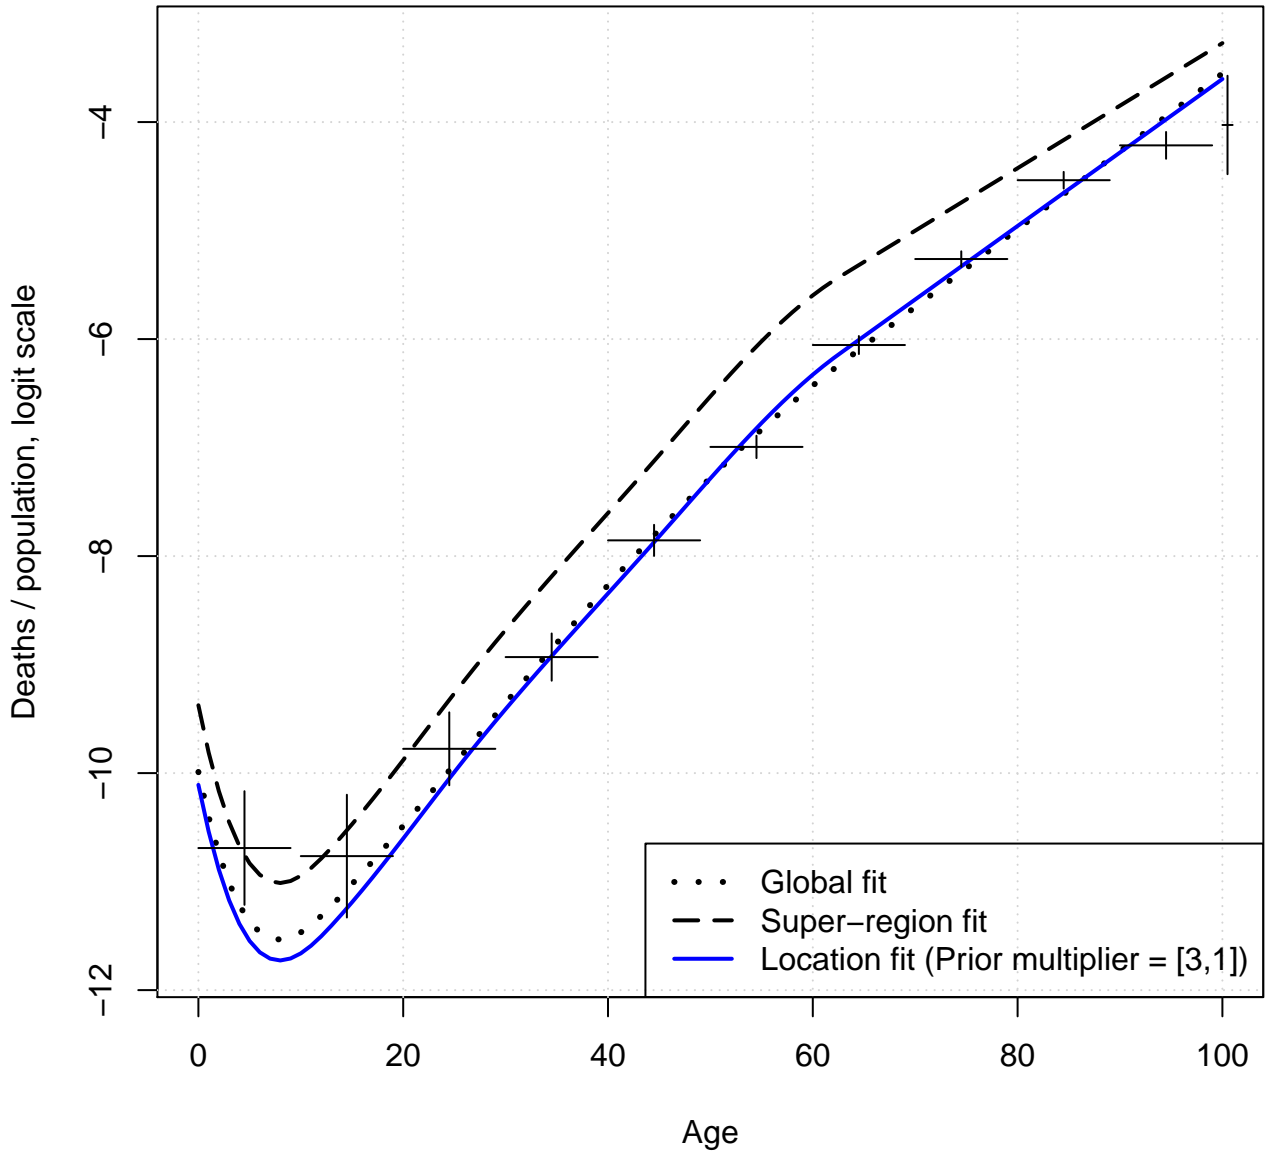

# Rondônia

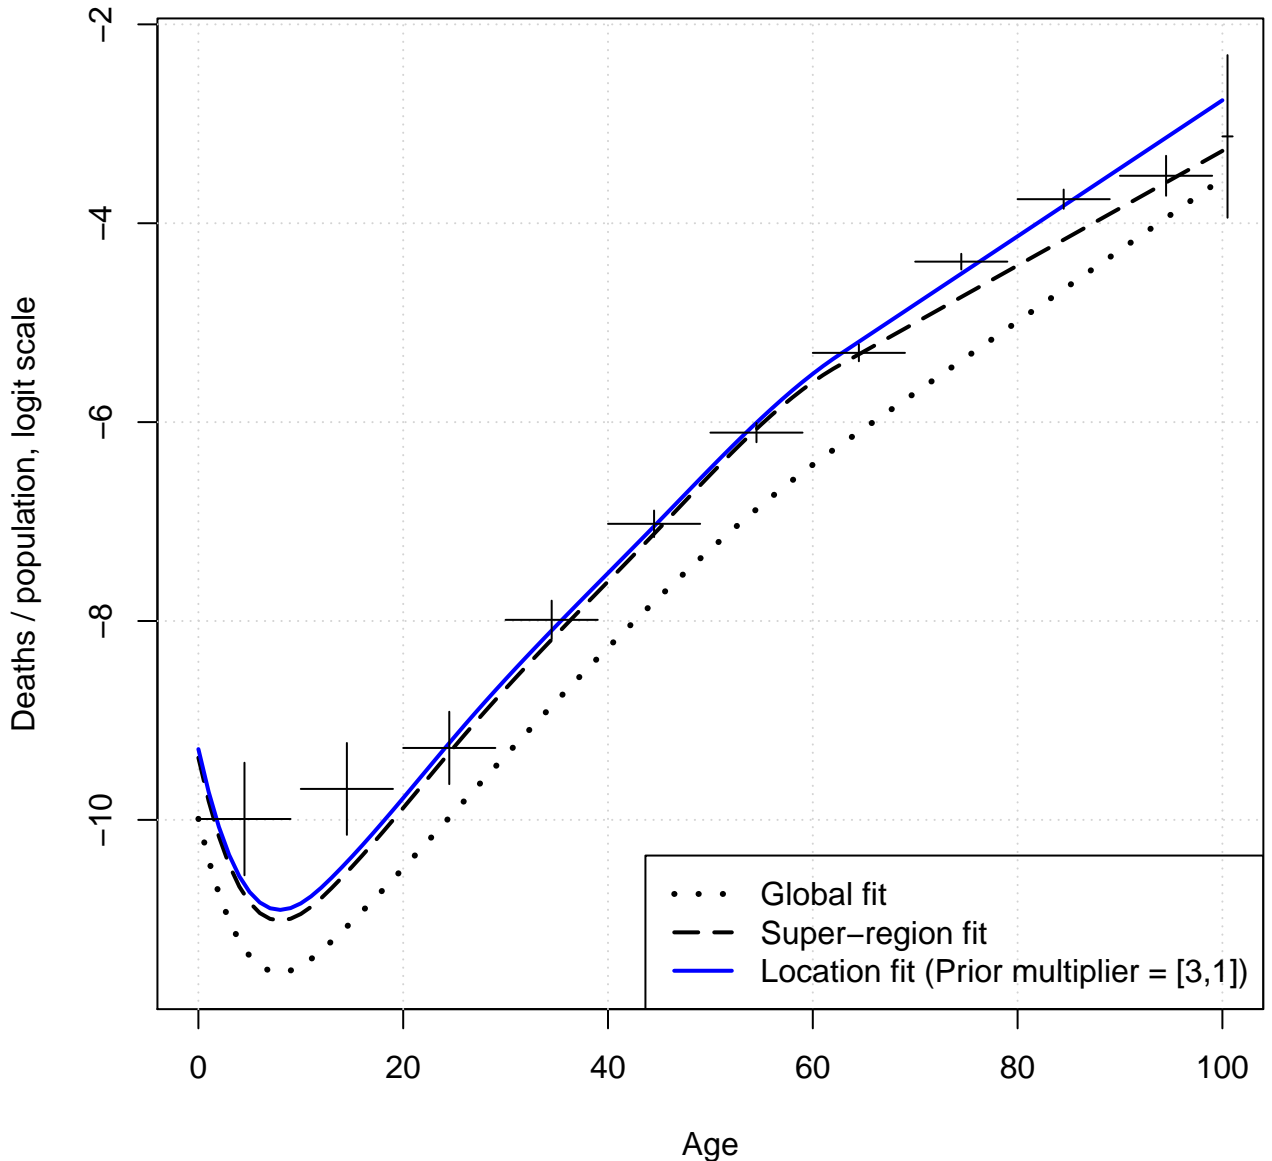

# Roraima

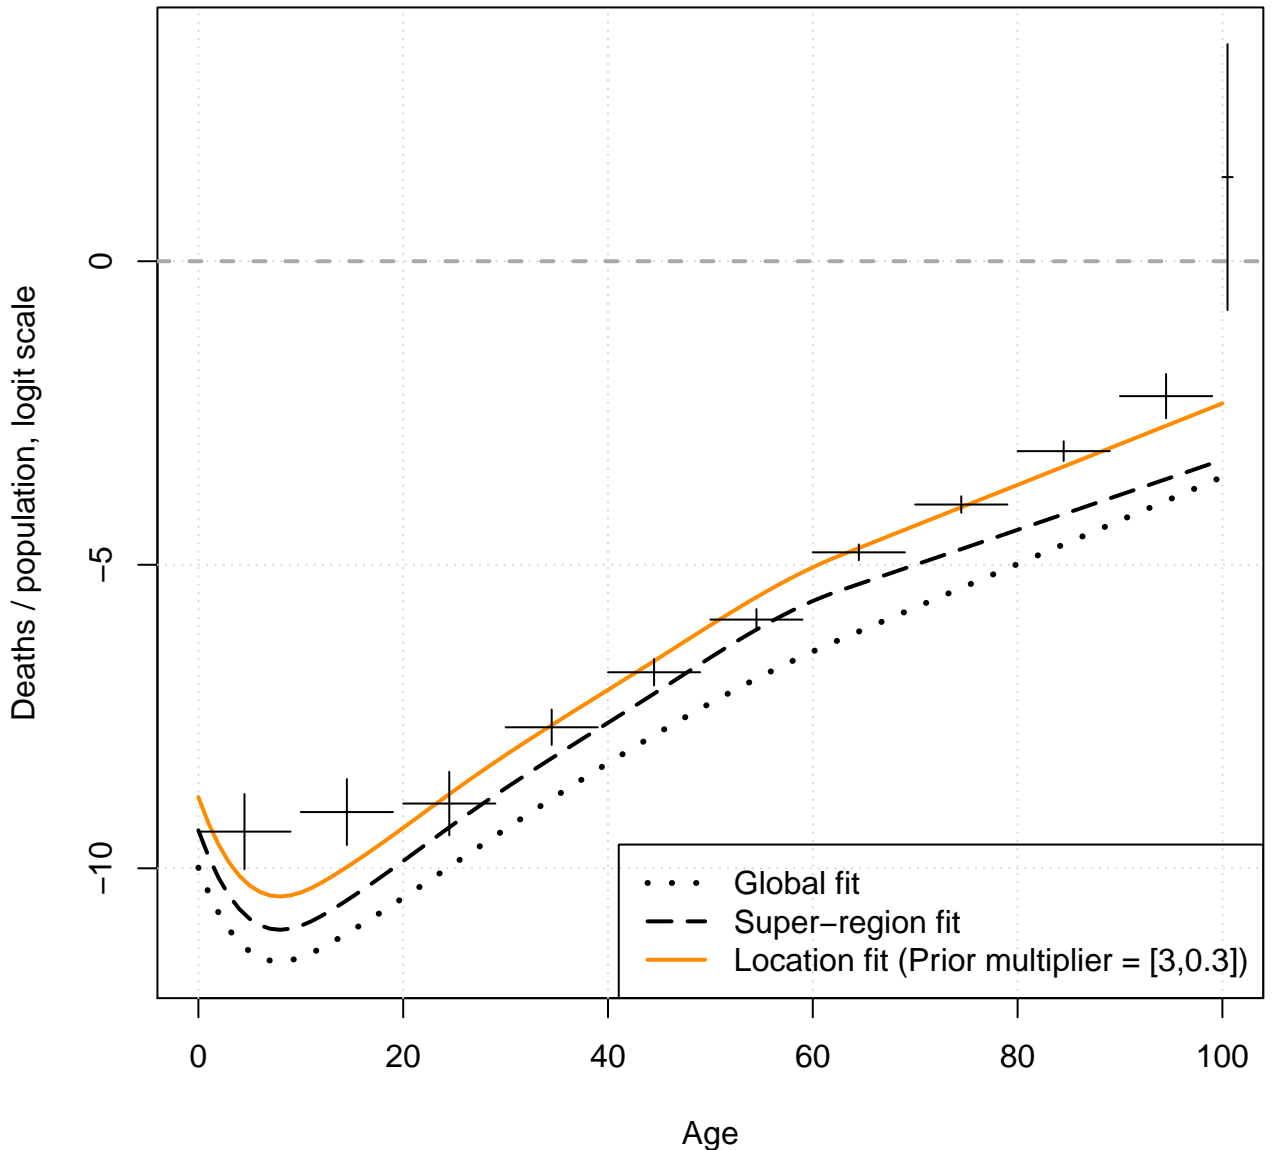

# Rio Grande do Sul

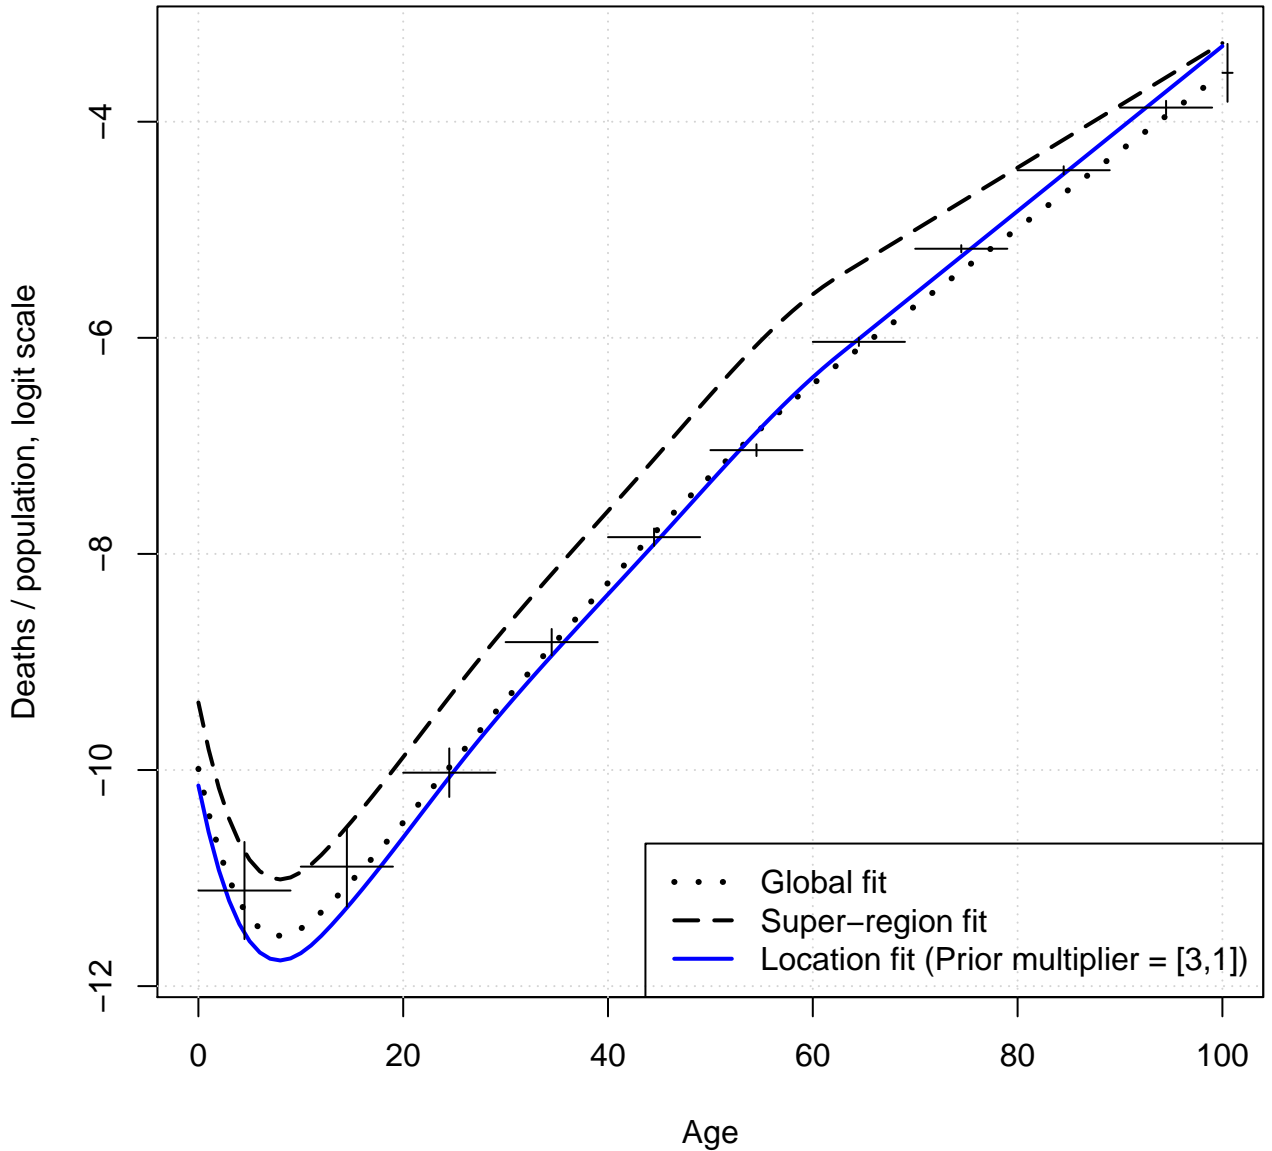



# Santa Catarina

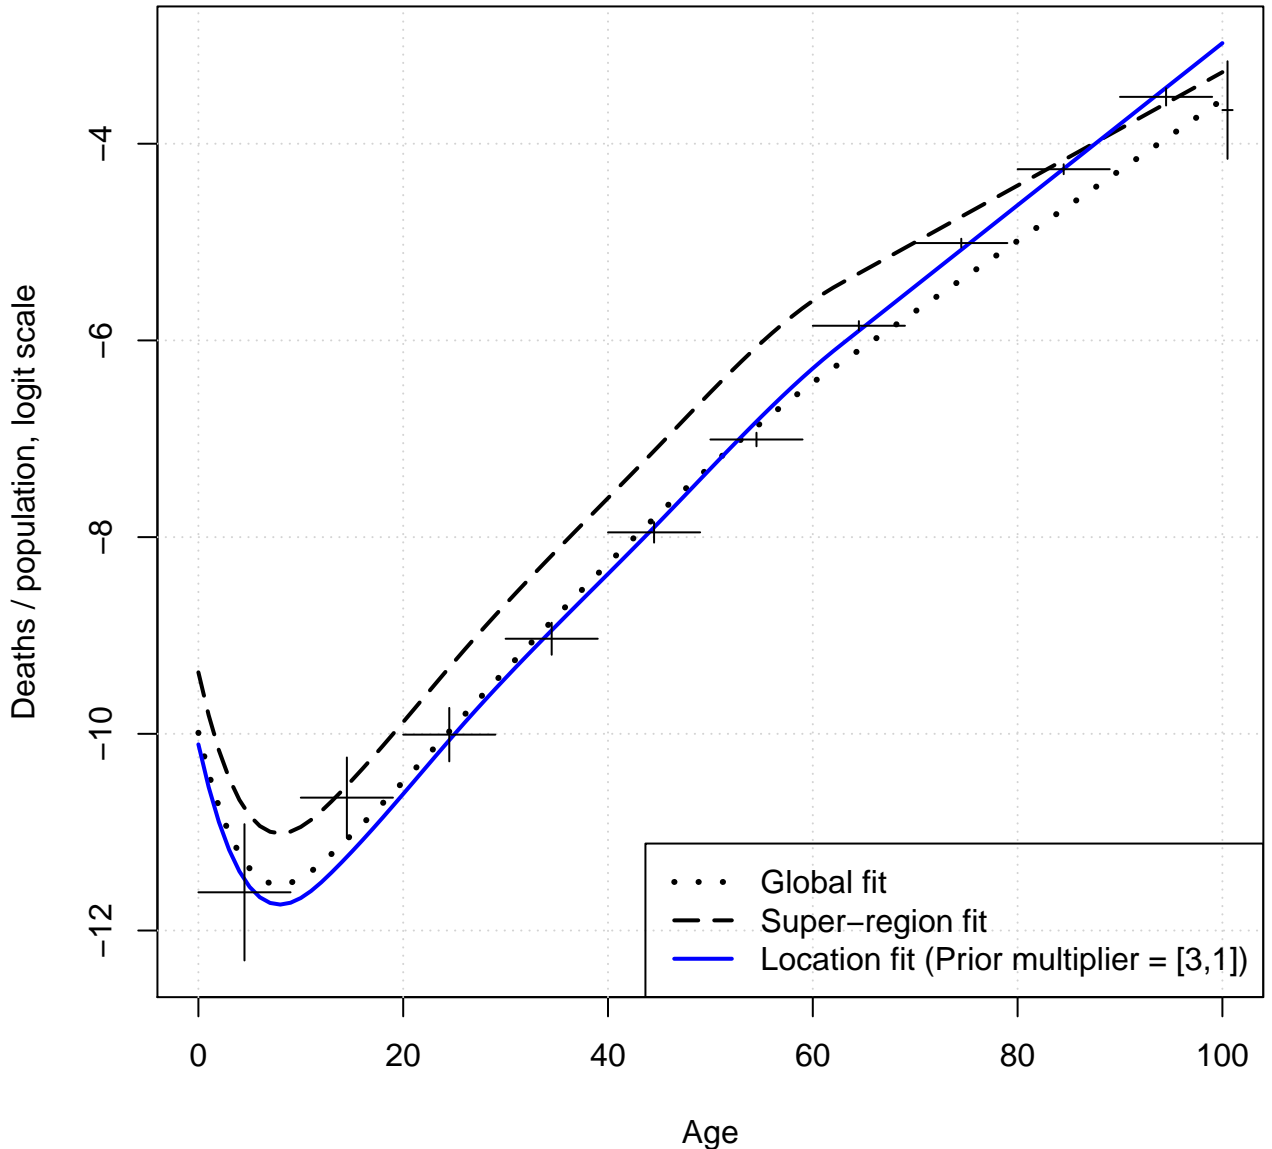

# Sergipe

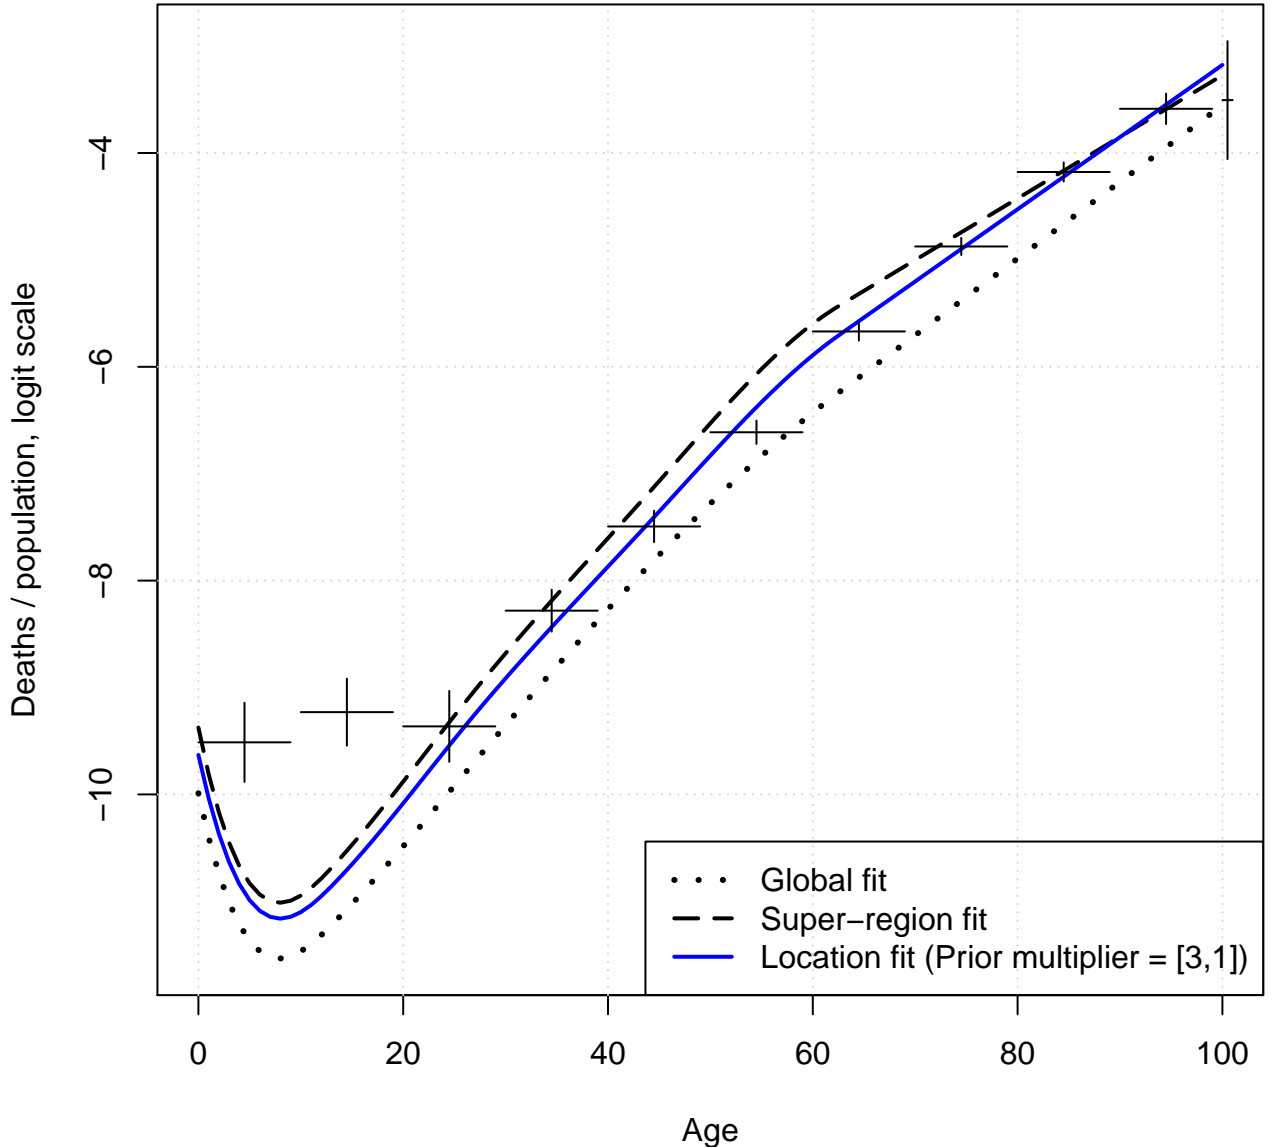

# São Paulo

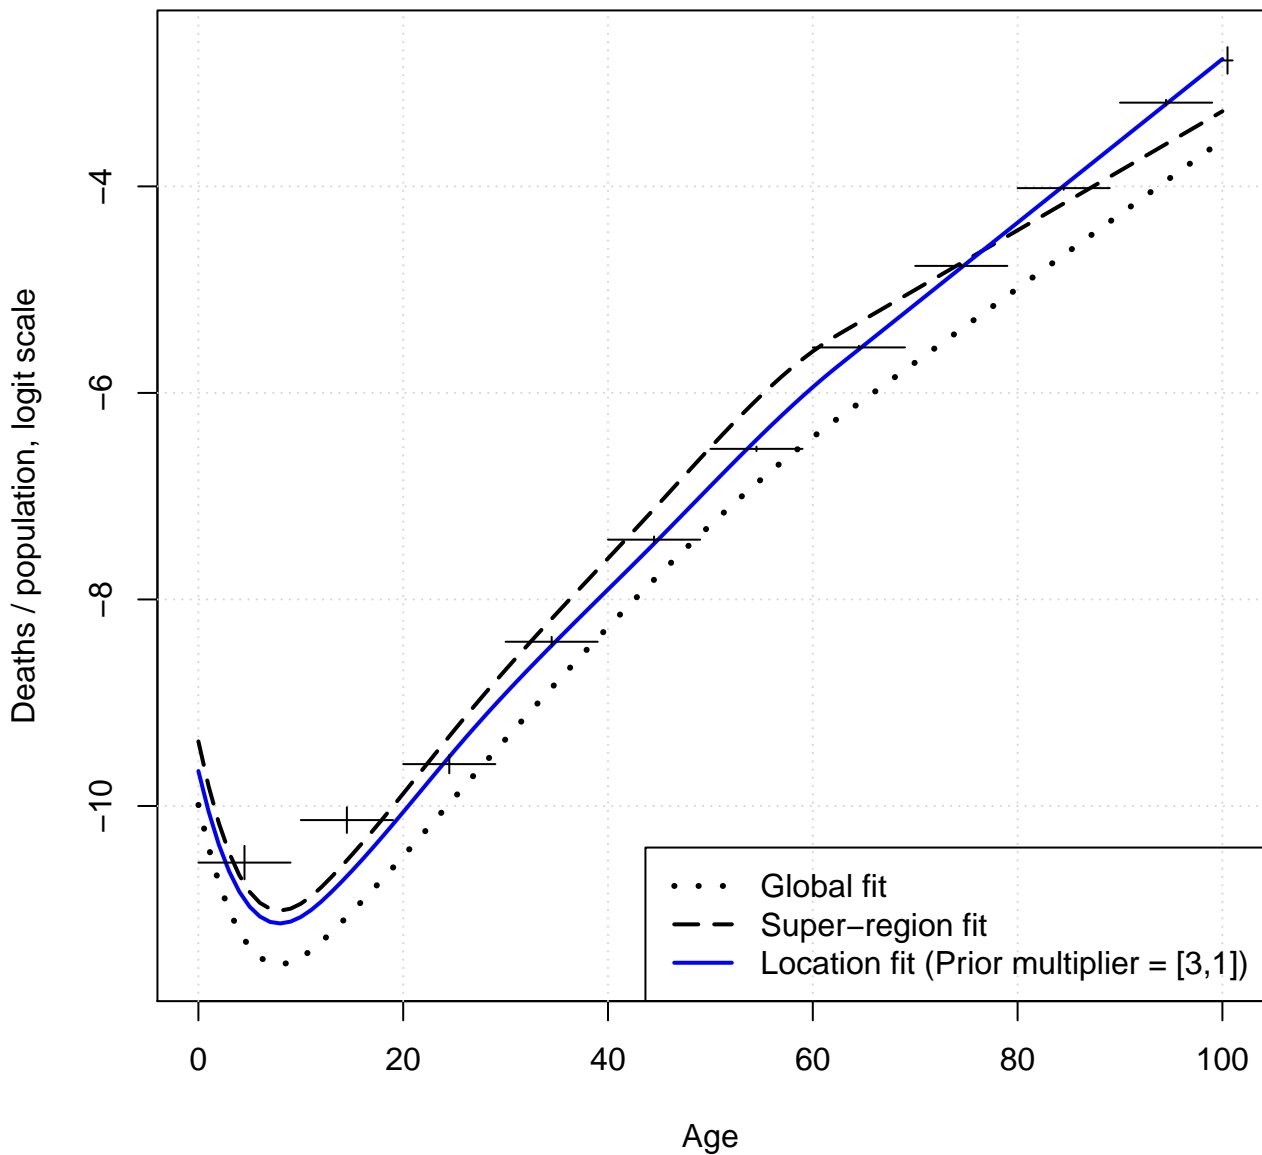

## Delhi

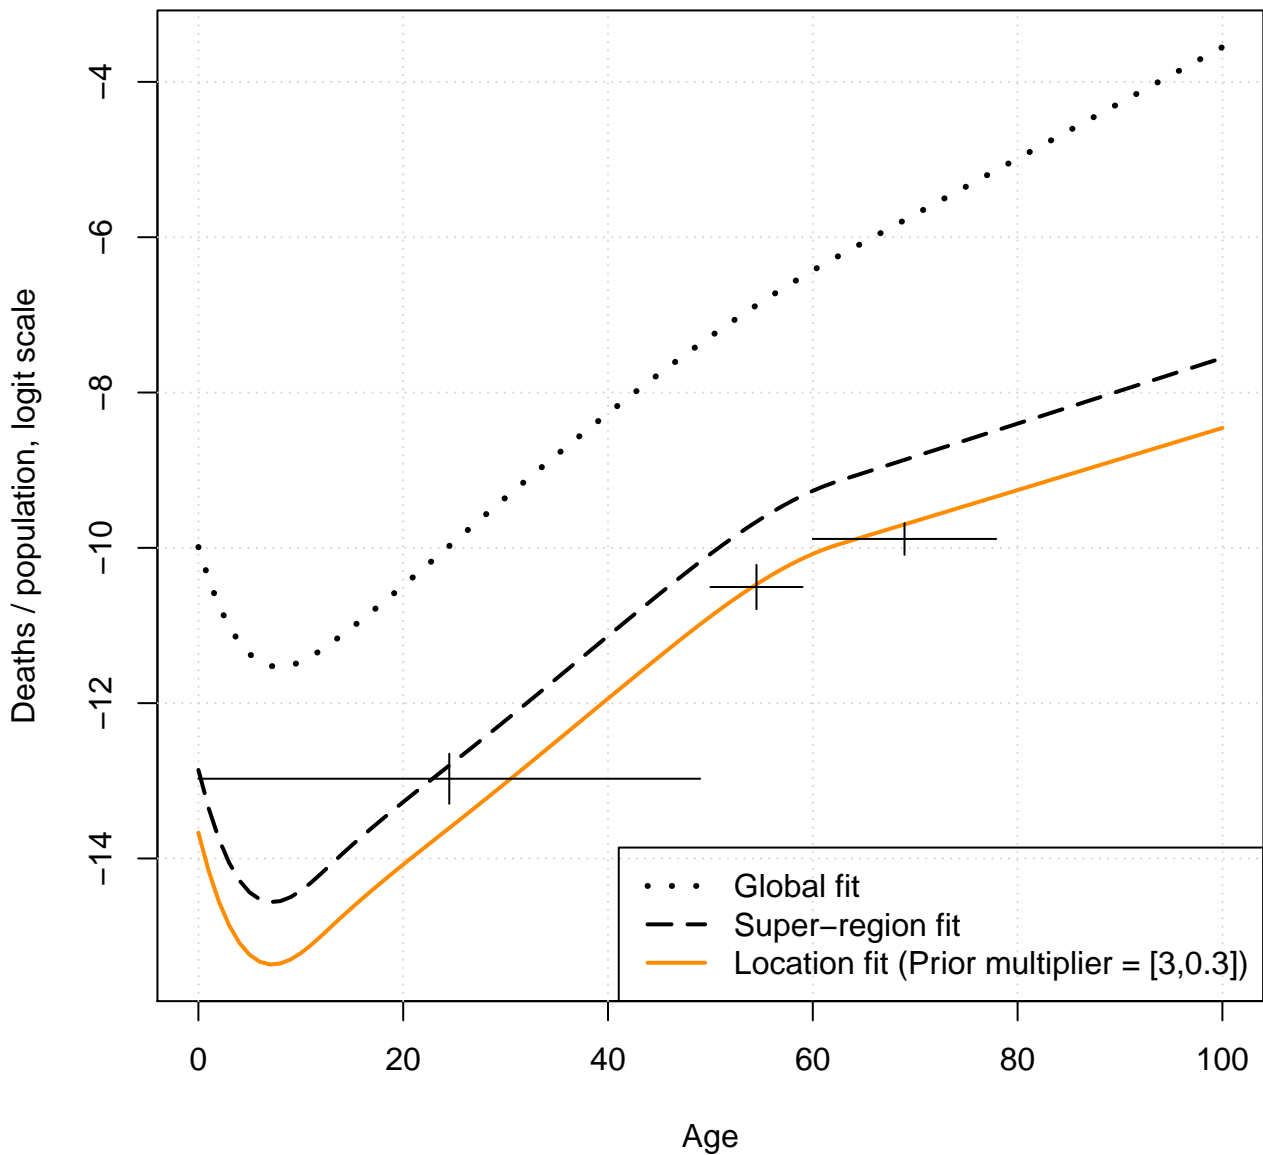

# Jharkhand

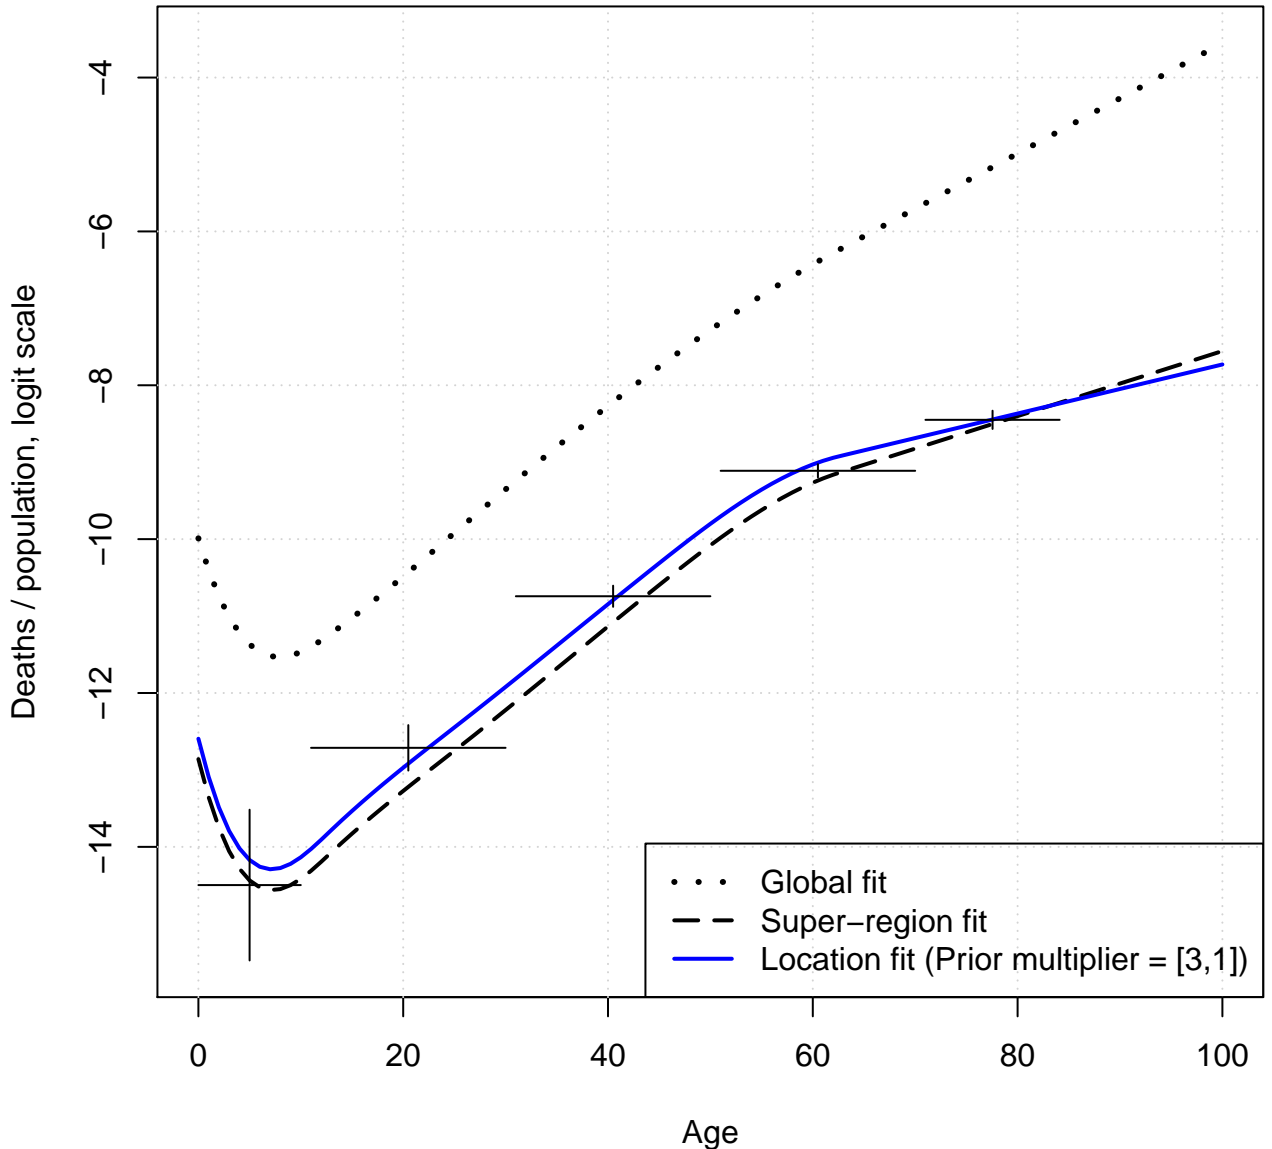

# Karnataka

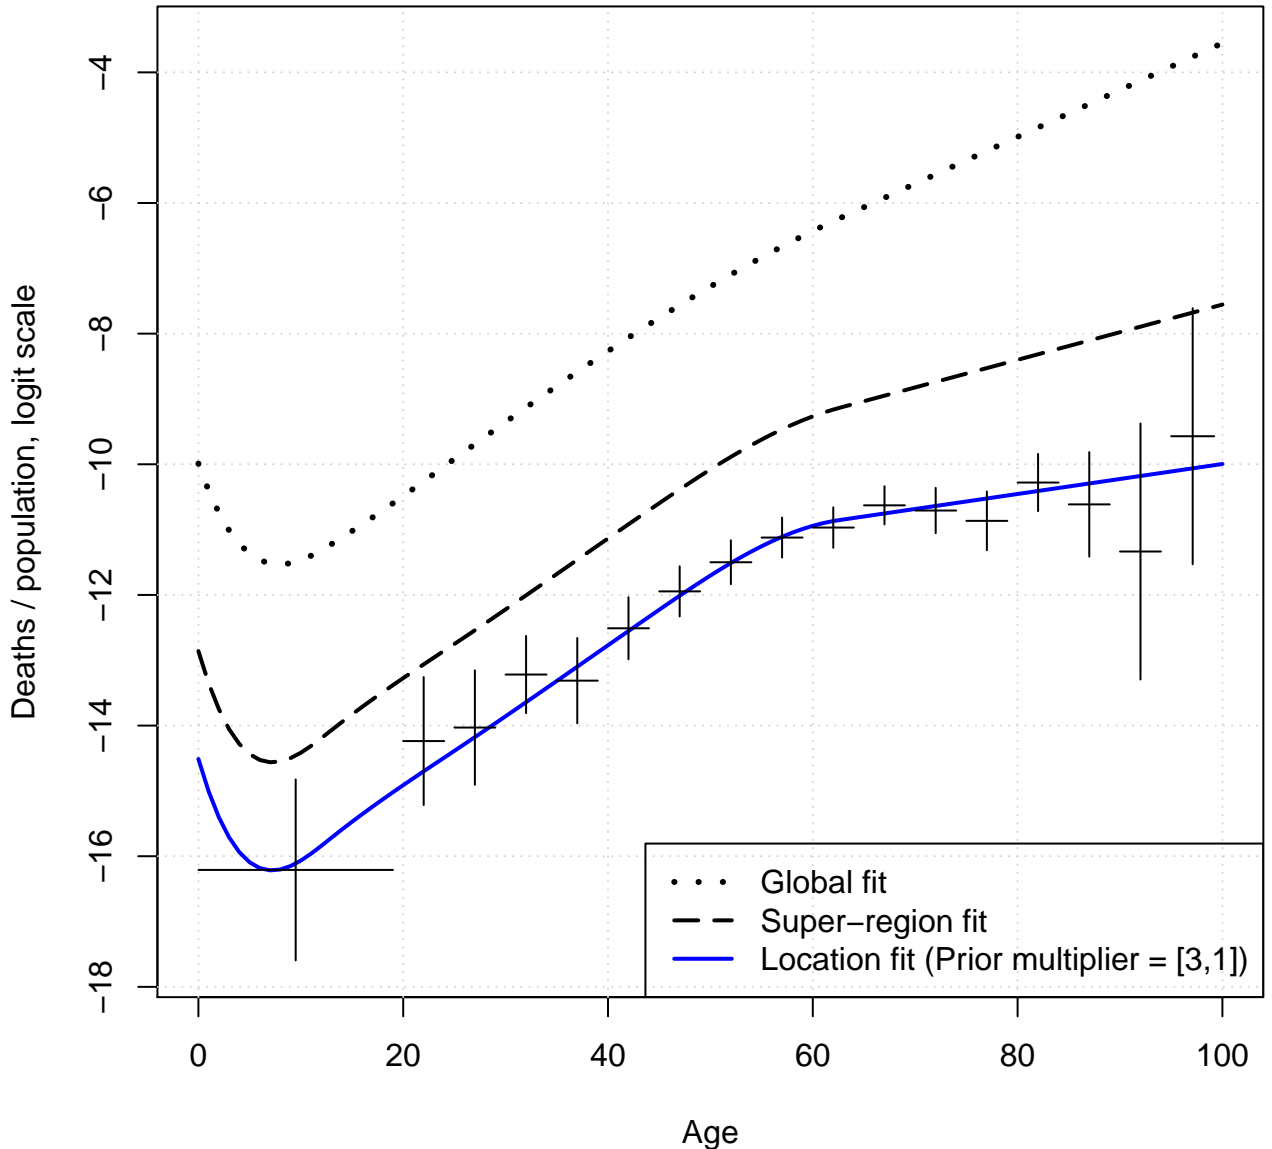

# Kerala

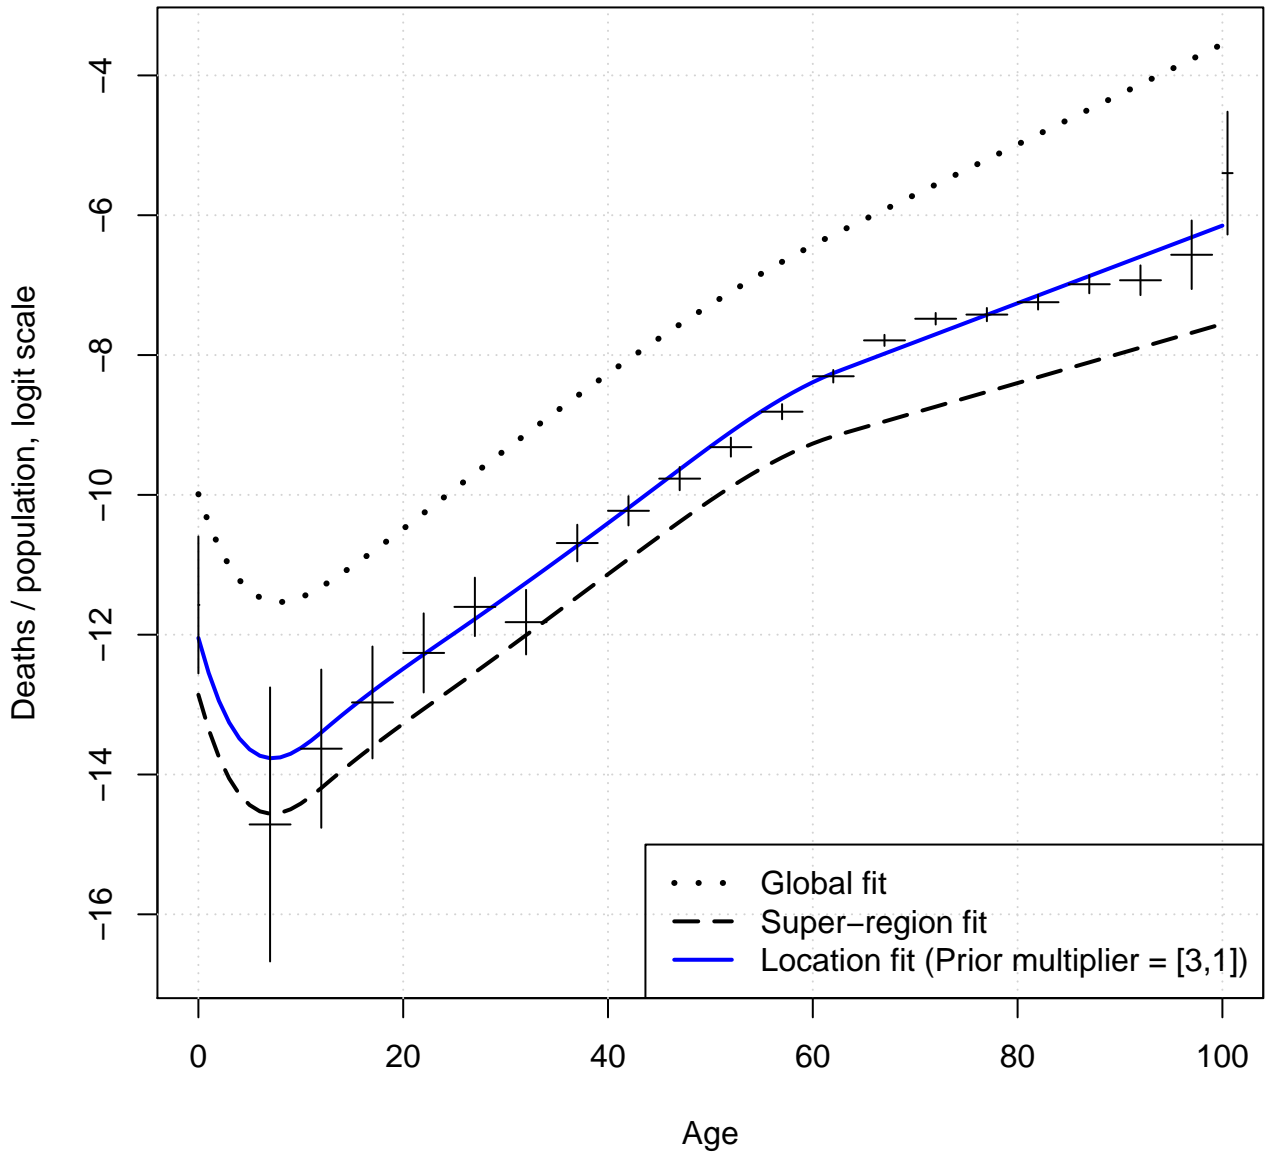

# Tamil Nadu

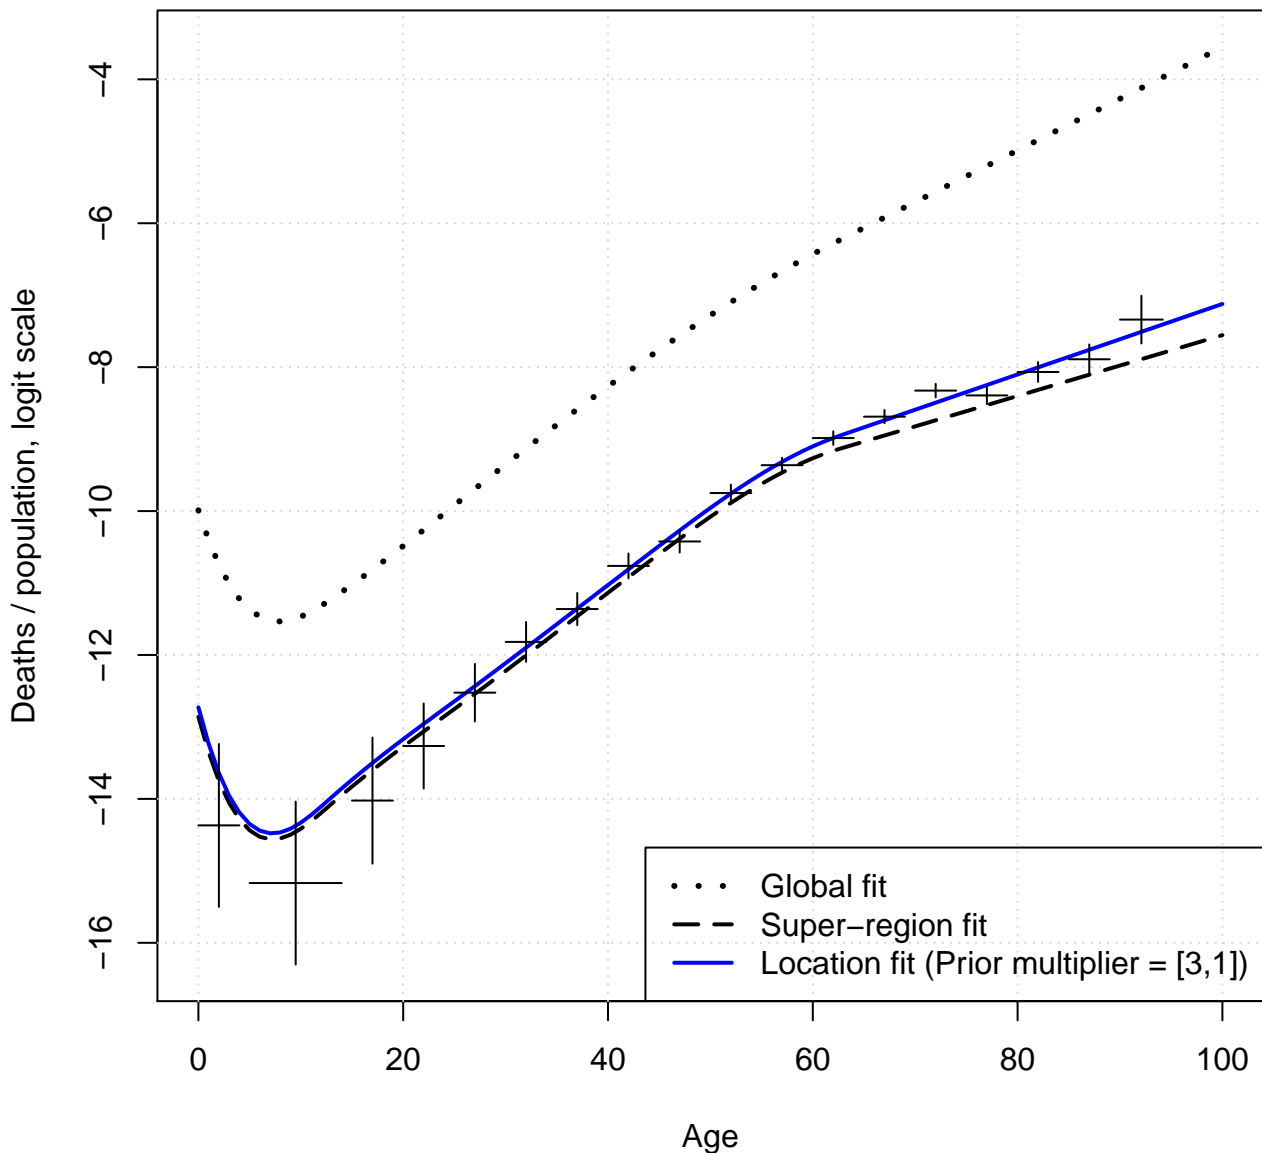



## Alberta

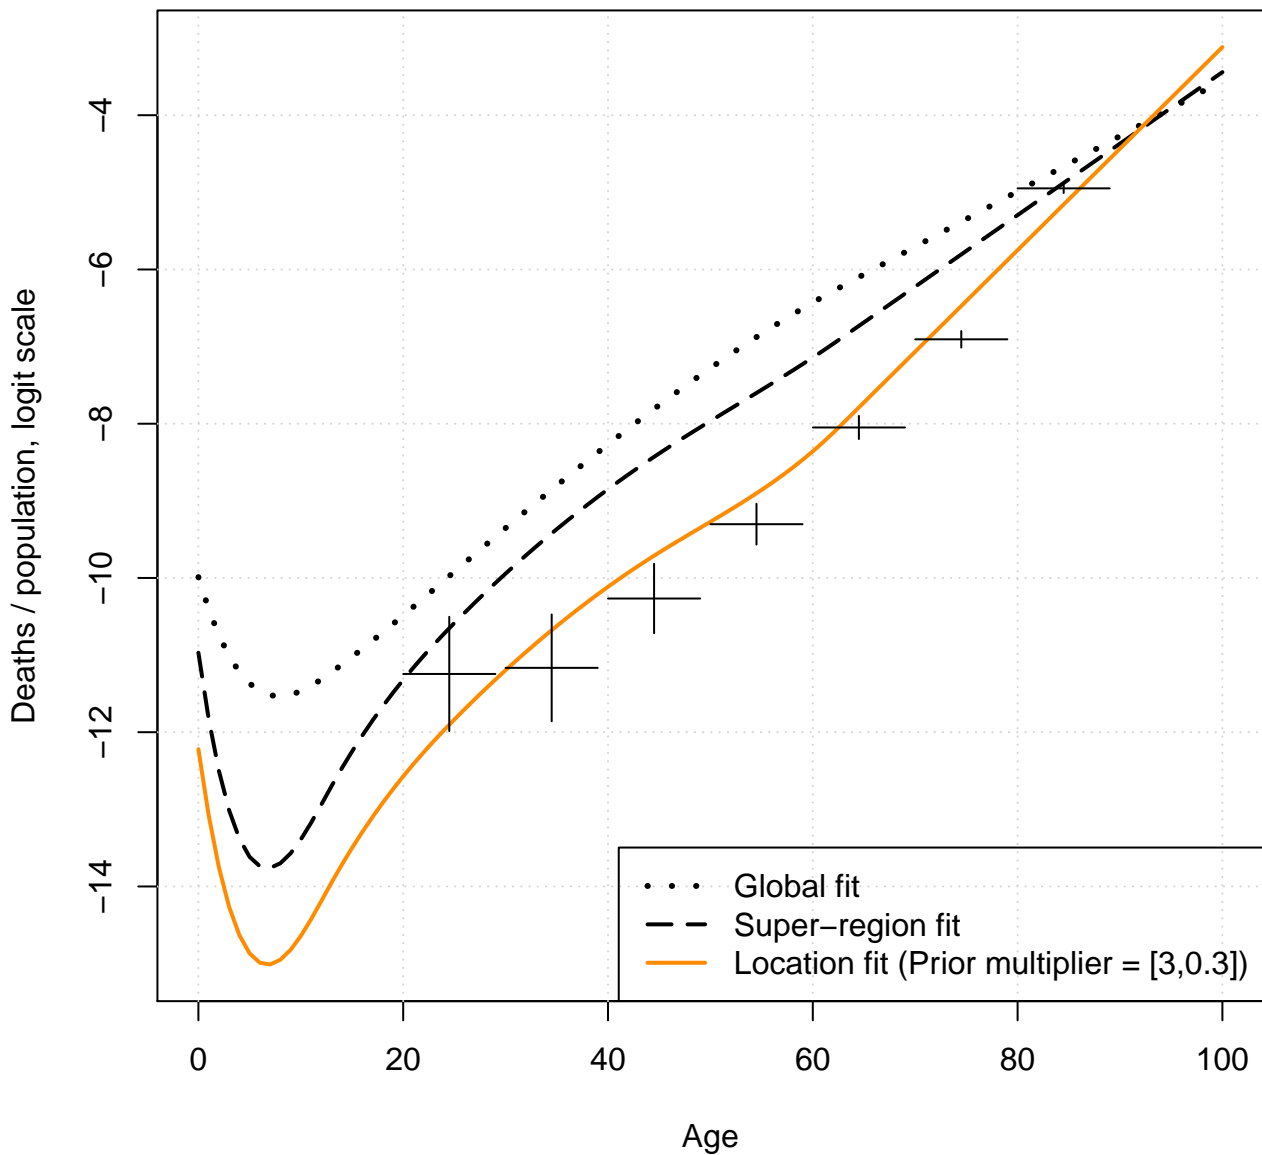

# British Columbia

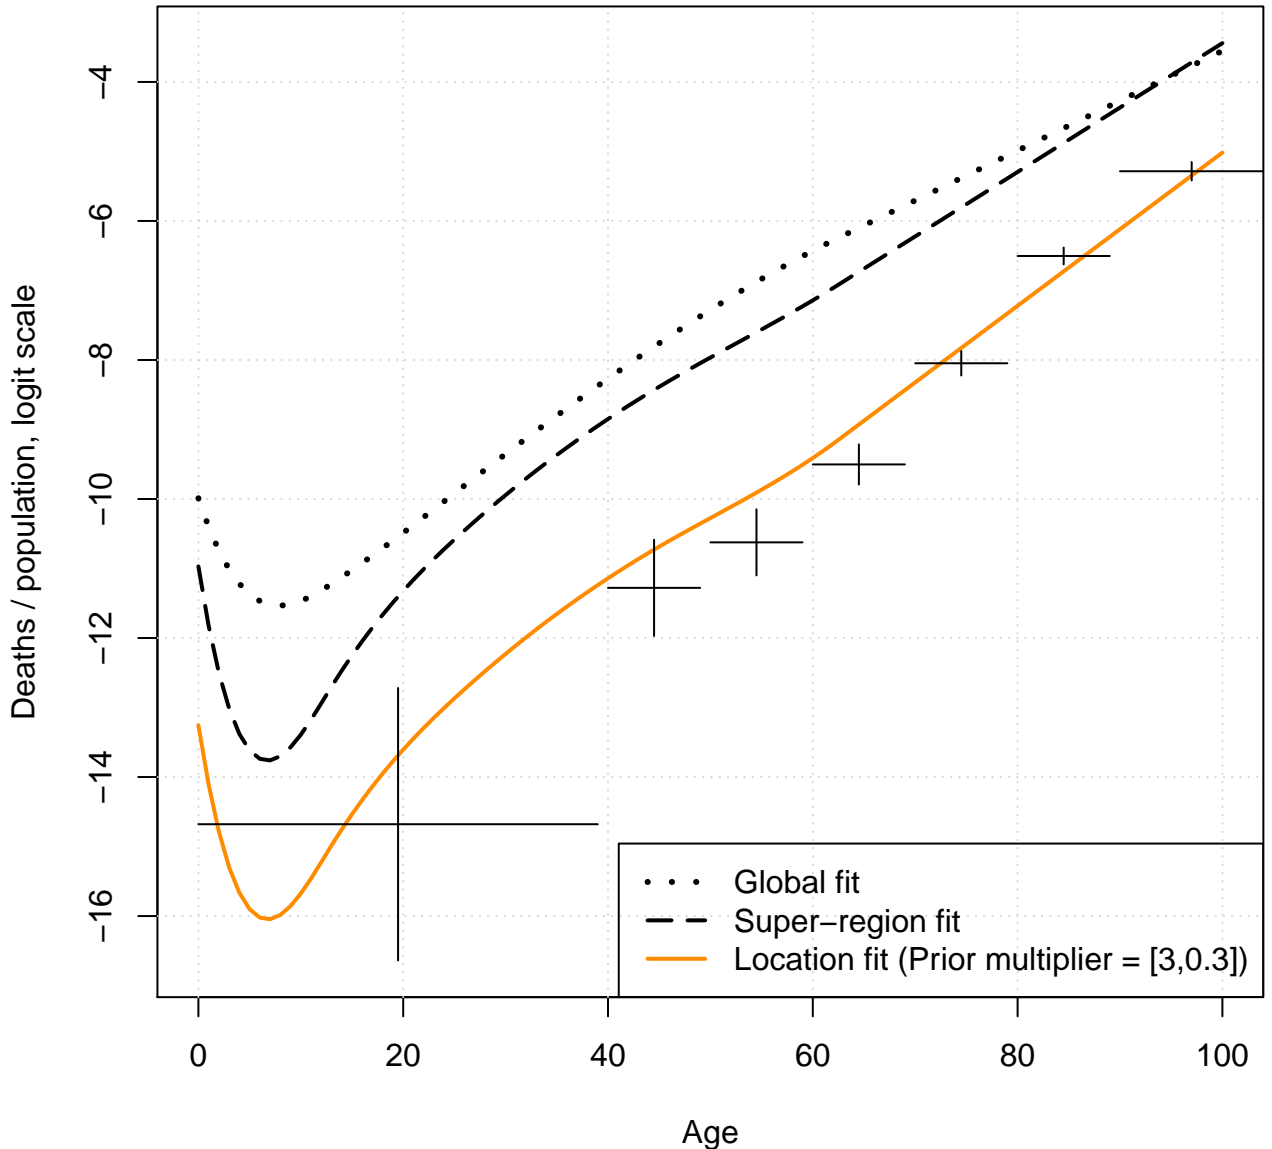

# Ontario

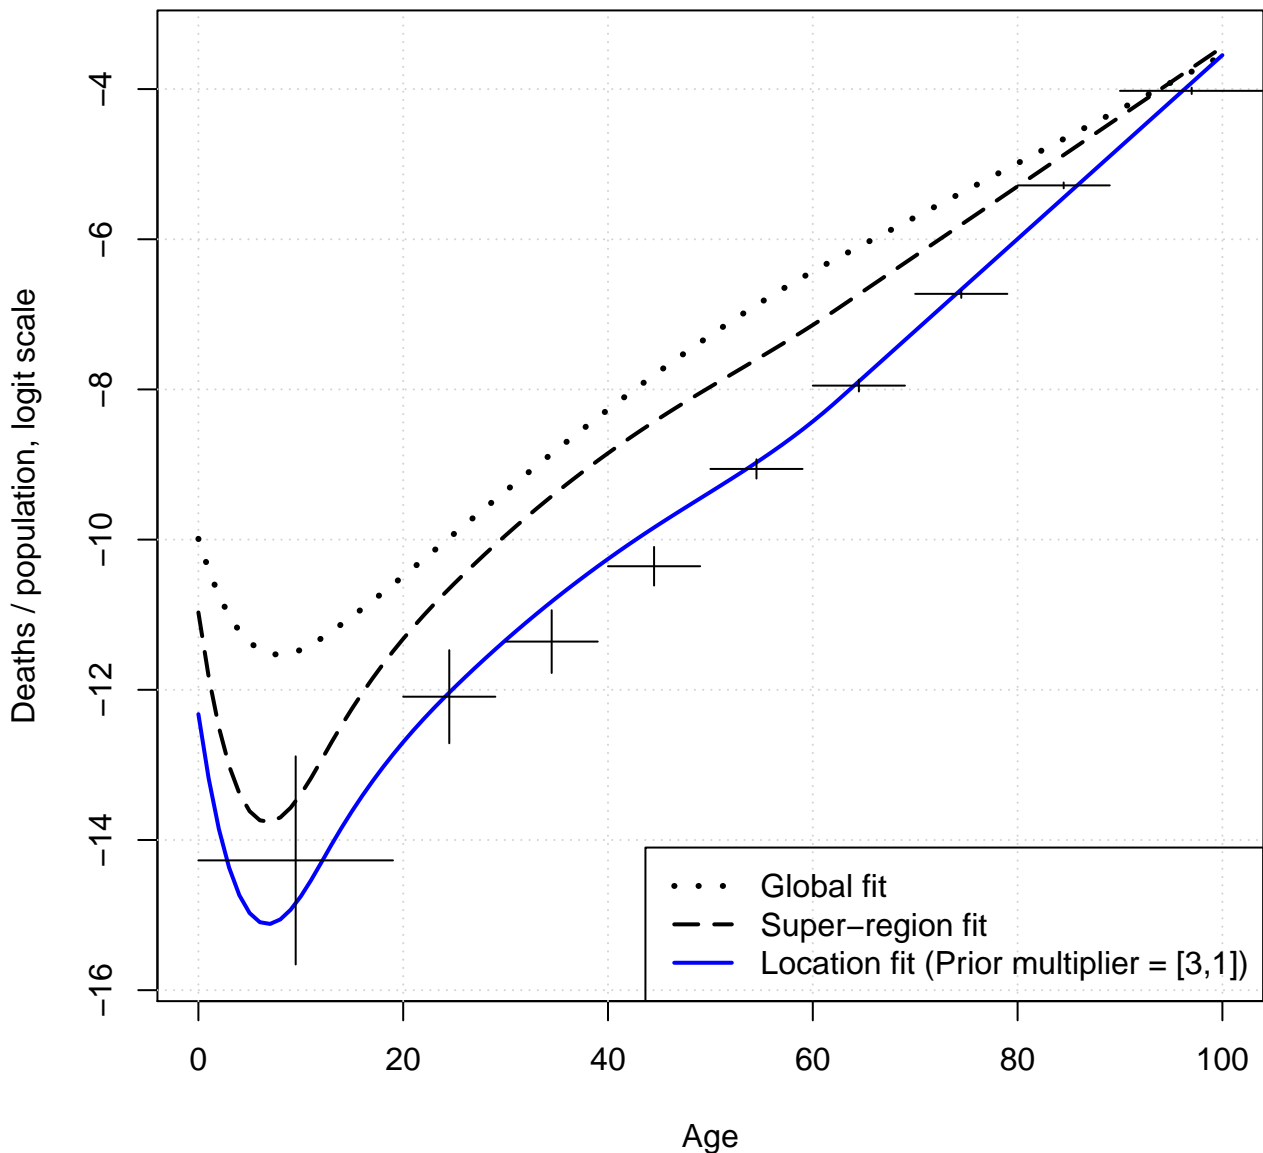

# Quebec

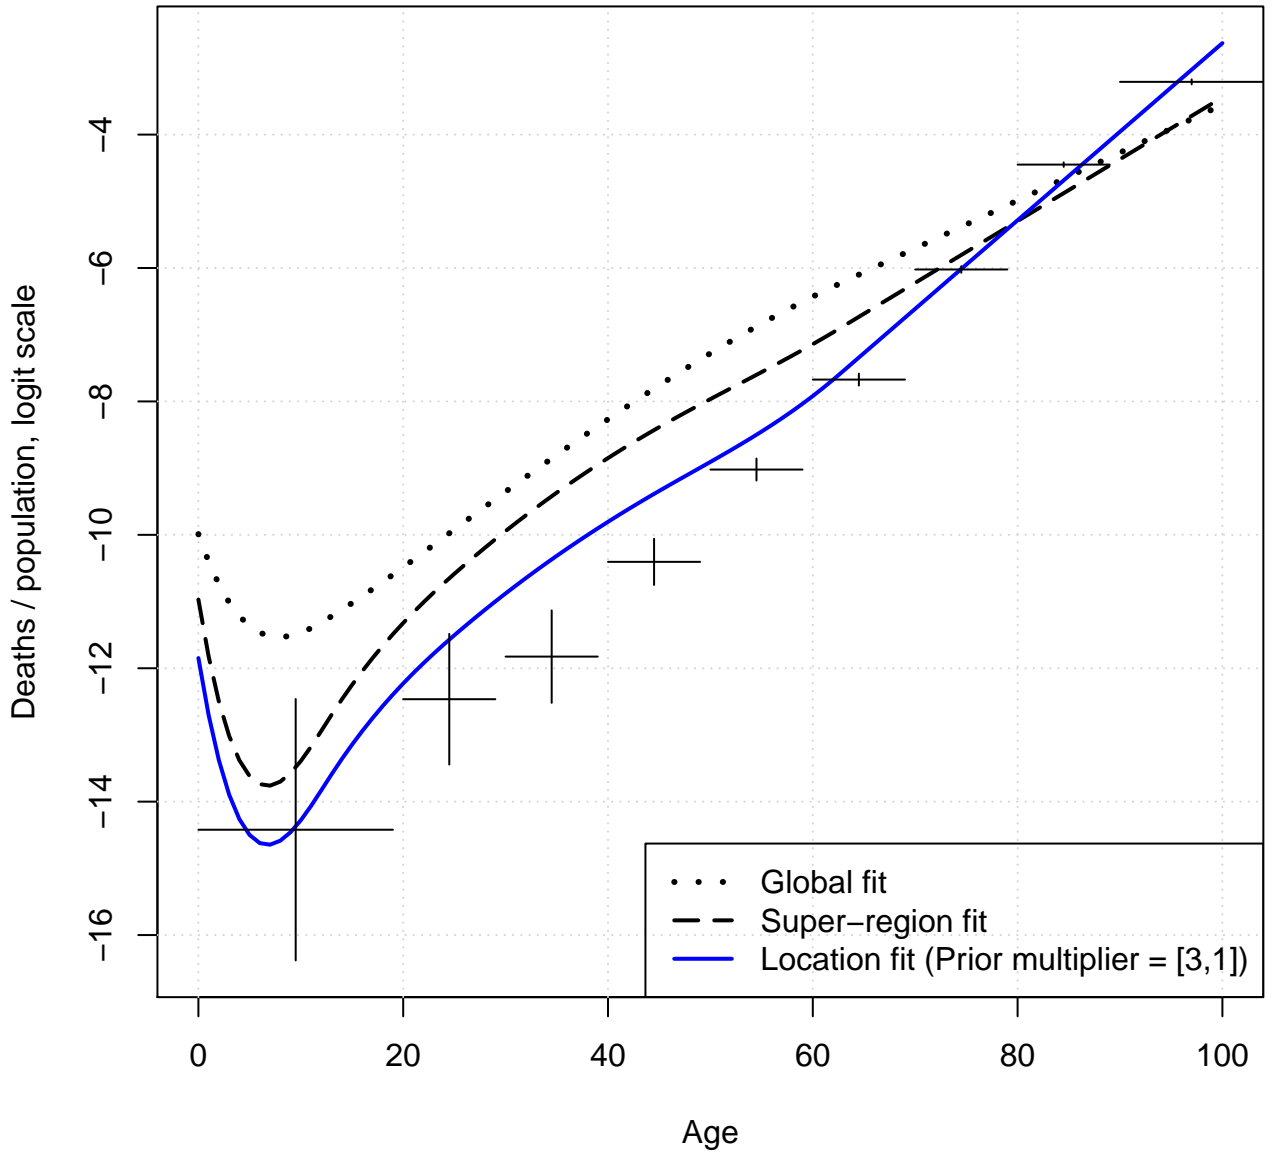

Supplement: mmc3.pdf [file mmc3.pdf]
