# Supplementary material
Source: PubMed Central journal article supplement (PMC9012890)
Supplement: mmc2.pdf [file mmc2.pdf]

# THE LANCET

## Supplementary appendix

This appendix formed part of the original submission and has been peer reviewed. We post it as supplied by the authors.

Supplement to: COVID-19 Forecasting Team. Variation in the COVID-19 infection–fatality ratio by age, time, and geography during the pre-vaccine era: a systematic analysis. *Lancet* 2022; published online Feb 24. [https://doi.org/10.1016/S0140-6736\(21\)02867-1](https://doi.org/10.1016/S0140-6736(21)02867-1).

## Appendix 2: Data sources for “Variations in the COVID-19 infection-fatality ratio by age, time, and geography during the pre-vaccine era”

This appendix provides information on data sources for “Variations in the COVID-19 infection-fatality ratio by age, time, and geography during the pre-vaccine era”

## Contents

|                                                                          |    |
|--------------------------------------------------------------------------|----|
| Section 1: Death sources .....                                           | 3  |
| Figure S1. Death data coverage by location.....                          | 3  |
| Table S1. Death data sources by location.....                            | 3  |
| Section 2: Age-stratified death sources.....                             | 50 |
| Figure S2. Age-stratified death data coverage by location .....          | 50 |
| Table S2. Age-stratified death data sources by location .....            | 50 |
| Section 3: Seroprevalence sources.....                                   | 61 |
| Figure S3. Seroprevalence data coverage by location.....                 | 61 |
| Table S3. Seroprevalence data sources by location .....                  | 61 |
| Section 4: Age-stratified seroprevalence sources .....                   | 91 |
| Figure S4: Age-stratified seroprevalence data coverage by location ..... | 91 |
| Table S4. Age-stratified seroprevalence data sources by location.....    | 91 |

Section 1: Death sources

Figure S1. Death data coverage by location

**Deaths**

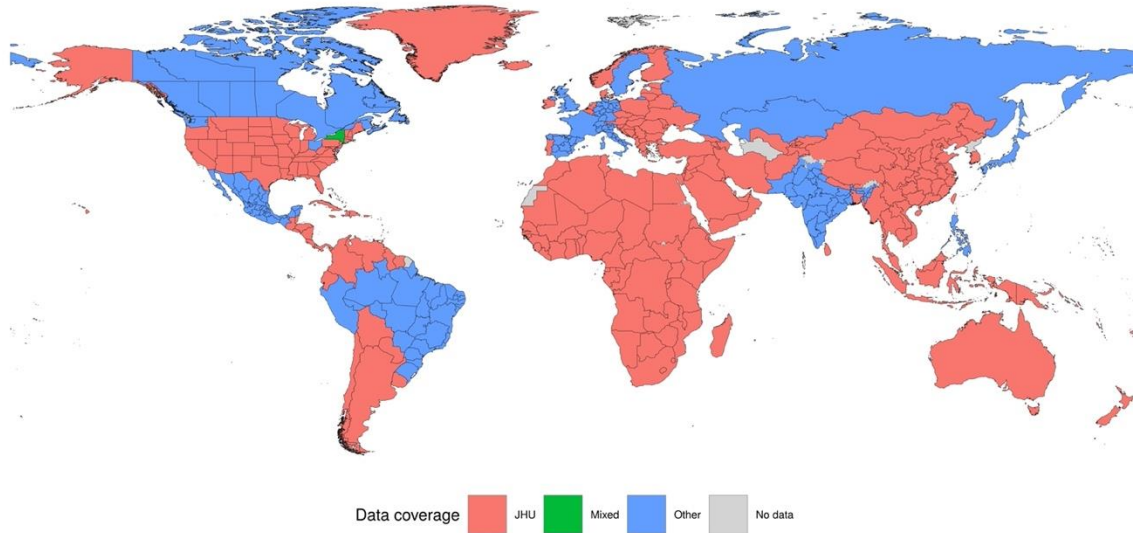

Table S1. Death data sources by location

| Location       | Source                                                                                                                                                      |
|----------------|-------------------------------------------------------------------------------------------------------------------------------------------------------------|
| Afghanistan    | Johns Hopkins University. 2019 Novel Coronavirus COVID-19 (2019-nCoV) Data Repository by Johns Hopkins CSSE. Baltimore, Maryland: Johns Hopkins University. |
| Albania        | Johns Hopkins University. 2019 Novel Coronavirus COVID-19 (2019-nCoV) Data Repository by Johns Hopkins CSSE. Baltimore, Maryland: Johns Hopkins University. |
| Algeria        | Johns Hopkins University. 2019 Novel Coronavirus COVID-19 (2019-nCoV) Data Repository by Johns Hopkins CSSE. Baltimore, Maryland: Johns Hopkins University. |
| American Samoa | Johns Hopkins University. 2019 Novel Coronavirus COVID-19 (2019-nCoV) Data Repository by Johns Hopkins CSSE. Baltimore, Maryland: Johns Hopkins University. |
| Andorra        | Johns Hopkins University. 2019 Novel Coronavirus COVID-19 (2019-nCoV) Data Repository by Johns Hopkins CSSE. Baltimore, Maryland: Johns Hopkins University. |
| Angola         | Johns Hopkins University. 2019 Novel Coronavirus COVID-19 (2019-nCoV) Data Repository by Johns Hopkins CSSE.                                                |

|                     |                                                                                                                                                             |
|---------------------|-------------------------------------------------------------------------------------------------------------------------------------------------------------|
|                     | Baltimore, Maryland: Johns Hopkins University.                                                                                                              |
| Antigua and Barbuda | Johns Hopkins University. 2019 Novel Coronavirus COVID-19 (2019-nCoV) Data Repository by Johns Hopkins CSSE. Baltimore, Maryland: Johns Hopkins University. |
| Argentina           | Johns Hopkins University. 2019 Novel Coronavirus COVID-19 (2019-nCoV) Data Repository by Johns Hopkins CSSE. Baltimore, Maryland: Johns Hopkins University. |
| Armenia             | Johns Hopkins University. 2019 Novel Coronavirus COVID-19 (2019-nCoV) Data Repository by Johns Hopkins CSSE. Baltimore, Maryland: Johns Hopkins University. |
| Australia           | Johns Hopkins University. 2019 Novel Coronavirus COVID-19 (2019-nCoV) Data Repository by Johns Hopkins CSSE. Baltimore, Maryland: Johns Hopkins University. |
| Austria             | Johns Hopkins University. 2019 Novel Coronavirus COVID-19 (2019-nCoV) Data Repository by Johns Hopkins CSSE. Baltimore, Maryland: Johns Hopkins University. |
| Azerbaijan          | Johns Hopkins University. 2019 Novel Coronavirus COVID-19 (2019-nCoV) Data Repository by Johns Hopkins CSSE. Baltimore, Maryland: Johns Hopkins University. |
| Bahrain             | Johns Hopkins University. 2019 Novel Coronavirus COVID-19 (2019-nCoV) Data Repository by Johns Hopkins CSSE. Baltimore, Maryland: Johns Hopkins University. |
| Bangladesh          | Johns Hopkins University. 2019 Novel Coronavirus COVID-19 (2019-nCoV) Data Repository by Johns Hopkins CSSE. Baltimore, Maryland: Johns Hopkins University. |
| Barbados            | Johns Hopkins University. 2019 Novel Coronavirus COVID-19 (2019-nCoV) Data Repository by Johns Hopkins CSSE. Baltimore, Maryland: Johns Hopkins University. |
| Belarus             | Johns Hopkins University. 2019 Novel Coronavirus COVID-19 (2019-nCoV) Data Repository by Johns Hopkins CSSE. Baltimore, Maryland: Johns Hopkins University. |

|                        |                                                                                                                                                             |
|------------------------|-------------------------------------------------------------------------------------------------------------------------------------------------------------|
| Belgium                | Johns Hopkins University. 2019 Novel Coronavirus COVID-19 (2019-nCoV) Data Repository by Johns Hopkins CSSE. Baltimore, Maryland: Johns Hopkins University. |
| Belize                 | Johns Hopkins University. 2019 Novel Coronavirus COVID-19 (2019-nCoV) Data Repository by Johns Hopkins CSSE. Baltimore, Maryland: Johns Hopkins University. |
| Benin                  | Johns Hopkins University. 2019 Novel Coronavirus COVID-19 (2019-nCoV) Data Repository by Johns Hopkins CSSE. Baltimore, Maryland: Johns Hopkins University. |
| Bermuda                | Johns Hopkins University. 2019 Novel Coronavirus COVID-19 (2019-nCoV) Data Repository by Johns Hopkins CSSE. Baltimore, Maryland: Johns Hopkins University. |
| Bhutan                 | Johns Hopkins University. 2019 Novel Coronavirus COVID-19 (2019-nCoV) Data Repository by Johns Hopkins CSSE. Baltimore, Maryland: Johns Hopkins University. |
| Bolivia                | Johns Hopkins University. 2019 Novel Coronavirus COVID-19 (2019-nCoV) Data Repository by Johns Hopkins CSSE. Baltimore, Maryland: Johns Hopkins University. |
| Bosnia and Herzegovina | Johns Hopkins University. 2019 Novel Coronavirus COVID-19 (2019-nCoV) Data Repository by Johns Hopkins CSSE. Baltimore, Maryland: Johns Hopkins University. |
| Botswana               | Johns Hopkins University. 2019 Novel Coronavirus COVID-19 (2019-nCoV) Data Repository by Johns Hopkins CSSE. Baltimore, Maryland: Johns Hopkins University. |
| Brazil, Acre           | Ministry of Health (Brazil). Brazil Ministry of Health COVID-19 Coronavirus Panel. Rio de Janeiro, Brazil: Ministry of Health (Brazil).                     |
| Brazil, Alagoas        | Ministry of Health (Brazil). Brazil Ministry of Health COVID-19 Coronavirus Panel. Rio de Janeiro, Brazil: Ministry of Health (Brazil).                     |
| Brazil, Amapá          | Ministry of Health (Brazil). Brazil Ministry of Health COVID-19 Coronavirus Panel. Rio de Janeiro, Brazil: Ministry of Health (Brazil).                     |

|                            |                                                                                                                                         |
|----------------------------|-----------------------------------------------------------------------------------------------------------------------------------------|
| Brazil, Amazonas           | Ministry of Health (Brazil). Brazil Ministry of Health COVID-19 Coronavirus Panel. Rio de Janeiro, Brazil: Ministry of Health (Brazil). |
| Brazil, Bahia              | Ministry of Health (Brazil). Brazil Ministry of Health COVID-19 Coronavirus Panel. Rio de Janeiro, Brazil: Ministry of Health (Brazil). |
| Brazil, Ceará              | Ministry of Health (Brazil). Brazil Ministry of Health COVID-19 Coronavirus Panel. Rio de Janeiro, Brazil: Ministry of Health (Brazil). |
| Brazil, Distrito Federal   | Ministry of Health (Brazil). Brazil Ministry of Health COVID-19 Coronavirus Panel. Rio de Janeiro, Brazil: Ministry of Health (Brazil). |
| Brazil, Espírito Santo     | Ministry of Health (Brazil). Brazil Ministry of Health COVID-19 Coronavirus Panel. Rio de Janeiro, Brazil: Ministry of Health (Brazil). |
| Brazil, Goiás              | Ministry of Health (Brazil). Brazil Ministry of Health COVID-19 Coronavirus Panel. Rio de Janeiro, Brazil: Ministry of Health (Brazil). |
| Brazil, Maranhão           | Ministry of Health (Brazil). Brazil Ministry of Health COVID-19 Coronavirus Panel. Rio de Janeiro, Brazil: Ministry of Health (Brazil). |
| Brazil, Mato Grosso        | Ministry of Health (Brazil). Brazil Ministry of Health COVID-19 Coronavirus Panel. Rio de Janeiro, Brazil: Ministry of Health (Brazil). |
| Brazil, Mato Grosso do Sul | Ministry of Health (Brazil). Brazil Ministry of Health COVID-19 Coronavirus Panel. Rio de Janeiro, Brazil: Ministry of Health (Brazil). |
| Brazil, Minas Gerais       | Ministry of Health (Brazil). Brazil Ministry of Health COVID-19 Coronavirus Panel. Rio de Janeiro, Brazil: Ministry of Health (Brazil). |
| Brazil, Pará               | Ministry of Health (Brazil). Brazil Ministry of Health COVID-19 Coronavirus Panel. Rio de Janeiro, Brazil: Ministry of Health (Brazil). |

|                             |                                                                                                                                         |
|-----------------------------|-----------------------------------------------------------------------------------------------------------------------------------------|
| Brazil, Paraíba             | Ministry of Health (Brazil). Brazil Ministry of Health COVID-19 Coronavirus Panel. Rio de Janeiro, Brazil: Ministry of Health (Brazil). |
| Brazil, Paraná              | Ministry of Health (Brazil). Brazil Ministry of Health COVID-19 Coronavirus Panel. Rio de Janeiro, Brazil: Ministry of Health (Brazil). |
| Brazil, Pernambuco          | Ministry of Health (Brazil). Brazil Ministry of Health COVID-19 Coronavirus Panel. Rio de Janeiro, Brazil: Ministry of Health (Brazil). |
| Brazil, Piauí               | Ministry of Health (Brazil). Brazil Ministry of Health COVID-19 Coronavirus Panel. Rio de Janeiro, Brazil: Ministry of Health (Brazil). |
| Brazil, Rio de Janeiro      | Ministry of Health (Brazil). Brazil Ministry of Health COVID-19 Coronavirus Panel. Rio de Janeiro, Brazil: Ministry of Health (Brazil). |
| Brazil, Rio Grande do Norte | Ministry of Health (Brazil). Brazil Ministry of Health COVID-19 Coronavirus Panel. Rio de Janeiro, Brazil: Ministry of Health (Brazil). |
| Brazil, Rio Grande do Sul   | Ministry of Health (Brazil). Brazil Ministry of Health COVID-19 Coronavirus Panel. Rio de Janeiro, Brazil: Ministry of Health (Brazil). |
| Brazil, Rondônia            | Ministry of Health (Brazil). Brazil Ministry of Health COVID-19 Coronavirus Panel. Rio de Janeiro, Brazil: Ministry of Health (Brazil). |
| Brazil, Roraima             | Ministry of Health (Brazil). Brazil Ministry of Health COVID-19 Coronavirus Panel. Rio de Janeiro, Brazil: Ministry of Health (Brazil). |
| Brazil, Santa Catarina      | Ministry of Health (Brazil). Brazil Ministry of Health COVID-19 Coronavirus Panel. Rio de Janeiro, Brazil: Ministry of Health (Brazil). |
| Brazil, São Paulo           | Ministry of Health (Brazil). Brazil Ministry of Health COVID-19 Coronavirus Panel. Rio de Janeiro, Brazil: Ministry of Health (Brazil). |



|                          |                                                                                                                                                             |
|--------------------------|-------------------------------------------------------------------------------------------------------------------------------------------------------------|
| Brazil, Sergipe          | Ministry of Health (Brazil). Brazil Ministry of Health COVID-19 Coronavirus Panel. Rio de Janeiro, Brazil: Ministry of Health (Brazil).                     |
| Brazil, Tocantins        | Ministry of Health (Brazil). Brazil Ministry of Health COVID-19 Coronavirus Panel. Rio de Janeiro, Brazil: Ministry of Health (Brazil).                     |
| Brunei                   | Johns Hopkins University. 2019 Novel Coronavirus COVID-19 (2019-nCoV) Data Repository by Johns Hopkins CSSE. Baltimore, Maryland: Johns Hopkins University. |
| Bulgaria                 | Johns Hopkins University. 2019 Novel Coronavirus COVID-19 (2019-nCoV) Data Repository by Johns Hopkins CSSE. Baltimore, Maryland: Johns Hopkins University. |
| Burkina Faso             | Johns Hopkins University. 2019 Novel Coronavirus COVID-19 (2019-nCoV) Data Repository by Johns Hopkins CSSE. Baltimore, Maryland: Johns Hopkins University. |
| Burundi                  | Johns Hopkins University. 2019 Novel Coronavirus COVID-19 (2019-nCoV) Data Repository by Johns Hopkins CSSE. Baltimore, Maryland: Johns Hopkins University. |
| Cambodia                 | Johns Hopkins University. 2019 Novel Coronavirus COVID-19 (2019-nCoV) Data Repository by Johns Hopkins CSSE. Baltimore, Maryland: Johns Hopkins University. |
| Cameroon                 | Johns Hopkins University. 2019 Novel Coronavirus COVID-19 (2019-nCoV) Data Repository by Johns Hopkins CSSE. Baltimore, Maryland: Johns Hopkins University. |
| Canada, Alberta          | Government of Canada. Canada Public Health Infobase Number of Total Cases of COVID-19. Ottawa, Canada: Government of Canada.                                |
| Canada, Alberta          | Government of Canada. Canada Coronavirus Disease 2019 (COVID-19) Daily Epidemiology Update. Ottawa, Canada: Government of Canada.                           |
| Canada, British Columbia | Government of Canada. Canada Public Health Infobase Number of Total Cases of COVID-19. Ottawa, Canada: Government of Canada.                                |

|                                   |                                                                                                                                   |
|-----------------------------------|-----------------------------------------------------------------------------------------------------------------------------------|
| Canada, British Columbia          | Government of Canada. Canada Coronavirus Disease 2019 (COVID-19) Daily Epidemiology Update. Ottawa, Canada: Government of Canada. |
| Canada, Manitoba                  | Government of Canada. Canada Public Health Infobase Number of Total Cases of COVID-19. Ottawa, Canada: Government of Canada.      |
| Canada, Manitoba                  | Government of Canada. Canada Coronavirus Disease 2019 (COVID-19) Daily Epidemiology Update. Ottawa, Canada: Government of Canada. |
| Canada, New Brunswick             | Government of Canada. Canada Public Health Infobase Number of Total Cases of COVID-19. Ottawa, Canada: Government of Canada.      |
| Canada, New Brunswick             | Government of Canada. Canada Coronavirus Disease 2019 (COVID-19) Daily Epidemiology Update. Ottawa, Canada: Government of Canada. |
| Canada, Newfoundland and Labrador | Government of Canada. Canada Public Health Infobase Number of Total Cases of COVID-19. Ottawa, Canada: Government of Canada.      |
| Canada, Newfoundland and Labrador | Government of Canada. Canada Coronavirus Disease 2019 (COVID-19) Daily Epidemiology Update. Ottawa, Canada: Government of Canada. |
| Canada, Northwest Territories     | Government of Canada. Canada Public Health Infobase Number of Total Cases of COVID-19. Ottawa, Canada: Government of Canada.      |
| Canada, Northwest Territories     | Government of Canada. Canada Coronavirus Disease 2019 (COVID-19) Daily Epidemiology Update. Ottawa, Canada: Government of Canada. |
| Canada, Nova Scotia               | Government of Canada. Canada Public Health Infobase Number of Total Cases of COVID-19. Ottawa, Canada: Government of Canada.      |
| Canada, Nova Scotia               | Government of Canada. Canada Coronavirus Disease 2019 (COVID-19) Daily Epidemiology Update. Ottawa, Canada: Government of Canada. |

|                              |                                                                                                                                   |
|------------------------------|-----------------------------------------------------------------------------------------------------------------------------------|
| Canada, Nunavut              | Government of Canada. Canada Public Health Infobase Number of Total Cases of COVID-19. Ottawa, Canada: Government of Canada.      |
| Canada, Nunavut              | Government of Canada. Canada Coronavirus Disease 2019 (COVID-19) Daily Epidemiology Update. Ottawa, Canada: Government of Canada. |
| Canada, Ontario              | Government of Canada. Canada Public Health Infobase Number of Total Cases of COVID-19. Ottawa, Canada: Government of Canada.      |
| Canada, Ontario              | Government of Canada. Canada Coronavirus Disease 2019 (COVID-19) Daily Epidemiology Update. Ottawa, Canada: Government of Canada. |
| Canada, Prince Edward Island | Government of Canada. Canada Public Health Infobase Number of Total Cases of COVID-19. Ottawa, Canada: Government of Canada.      |
| Canada, Prince Edward Island | Government of Canada. Canada Coronavirus Disease 2019 (COVID-19) Daily Epidemiology Update. Ottawa, Canada: Government of Canada. |
| Canada, Quebec               | Government of Canada. Canada Public Health Infobase Number of Total Cases of COVID-19. Ottawa, Canada: Government of Canada.      |
| Canada, Quebec               | Government of Canada. Canada Coronavirus Disease 2019 (COVID-19) Daily Epidemiology Update. Ottawa, Canada: Government of Canada. |
| Canada, Saskatchewan         | Government of Canada. Canada Public Health Infobase Number of Total Cases of COVID-19. Ottawa, Canada: Government of Canada.      |
| Canada, Saskatchewan         | Government of Canada. Canada Coronavirus Disease 2019 (COVID-19) Daily Epidemiology Update. Ottawa, Canada: Government of Canada. |
| Canada, Yukon                | Government of Canada. Canada Public Health Infobase Number of Total Cases of COVID-19. Ottawa, Canada: Government of Canada.      |

|                          |                                                                                                                                                             |
|--------------------------|-------------------------------------------------------------------------------------------------------------------------------------------------------------|
| Canada, Yukon            | Government of Canada. Canada Coronavirus Disease 2019 (COVID-19) Daily Epidemiology Update. Ottawa, Canada: Government of Canada.                           |
| Cape Verde               | Johns Hopkins University. 2019 Novel Coronavirus COVID-19 (2019-nCoV) Data Repository by Johns Hopkins CSSE. Baltimore, Maryland: Johns Hopkins University. |
| Central African Republic | Johns Hopkins University. 2019 Novel Coronavirus COVID-19 (2019-nCoV) Data Repository by Johns Hopkins CSSE. Baltimore, Maryland: Johns Hopkins University. |
| Chad                     | Johns Hopkins University. 2019 Novel Coronavirus COVID-19 (2019-nCoV) Data Repository by Johns Hopkins CSSE. Baltimore, Maryland: Johns Hopkins University. |
| Chile                    | Johns Hopkins University. 2019 Novel Coronavirus COVID-19 (2019-nCoV) Data Repository by Johns Hopkins CSSE. Baltimore, Maryland: Johns Hopkins University. |
| China, Anhui             | Johns Hopkins University. 2019 Novel Coronavirus COVID-19 (2019-nCoV) Data Repository by Johns Hopkins CSSE. Baltimore, Maryland: Johns Hopkins University. |
| China, Beijing           | Johns Hopkins University. 2019 Novel Coronavirus COVID-19 (2019-nCoV) Data Repository by Johns Hopkins CSSE. Baltimore, Maryland: Johns Hopkins University. |
| China, Chongqing         | Johns Hopkins University. 2019 Novel Coronavirus COVID-19 (2019-nCoV) Data Repository by Johns Hopkins CSSE. Baltimore, Maryland: Johns Hopkins University. |
| China, Fujian            | Johns Hopkins University. 2019 Novel Coronavirus COVID-19 (2019-nCoV) Data Repository by Johns Hopkins CSSE. Baltimore, Maryland: Johns Hopkins University. |
| China, Gansu             | Johns Hopkins University. 2019 Novel Coronavirus COVID-19 (2019-nCoV) Data Repository by Johns Hopkins CSSE. Baltimore, Maryland: Johns Hopkins University. |
| China, Guangdong         | Johns Hopkins University. 2019 Novel Coronavirus COVID-19 (2019-nCoV) Data Repository by Johns Hopkins CSSE. Baltimore, Maryland: Johns Hopkins University. |

|                                                         |                                                                                                                                                             |
|---------------------------------------------------------|-------------------------------------------------------------------------------------------------------------------------------------------------------------|
| China, Guangxi                                          | Johns Hopkins University. 2019 Novel Coronavirus COVID-19 (2019-nCoV) Data Repository by Johns Hopkins CSSE. Baltimore, Maryland: Johns Hopkins University. |
| China, Guizhou                                          | Johns Hopkins University. 2019 Novel Coronavirus COVID-19 (2019-nCoV) Data Repository by Johns Hopkins CSSE. Baltimore, Maryland: Johns Hopkins University. |
| China, Hainan                                           | Johns Hopkins University. 2019 Novel Coronavirus COVID-19 (2019-nCoV) Data Repository by Johns Hopkins CSSE. Baltimore, Maryland: Johns Hopkins University. |
| China, Hebei                                            | Johns Hopkins University. 2019 Novel Coronavirus COVID-19 (2019-nCoV) Data Repository by Johns Hopkins CSSE. Baltimore, Maryland: Johns Hopkins University. |
| China, Heilongjiang                                     | Johns Hopkins University. 2019 Novel Coronavirus COVID-19 (2019-nCoV) Data Repository by Johns Hopkins CSSE. Baltimore, Maryland: Johns Hopkins University. |
| China, Henan                                            | Johns Hopkins University. 2019 Novel Coronavirus COVID-19 (2019-nCoV) Data Repository by Johns Hopkins CSSE. Baltimore, Maryland: Johns Hopkins University. |
| China, Hong Kong Special Administrative Region of China | Johns Hopkins University. 2019 Novel Coronavirus COVID-19 (2019-nCoV) Data Repository by Johns Hopkins CSSE. Baltimore, Maryland: Johns Hopkins University. |
| China, Hubei                                            | Johns Hopkins University. 2019 Novel Coronavirus COVID-19 (2019-nCoV) Data Repository by Johns Hopkins CSSE. Baltimore, Maryland: Johns Hopkins University. |
| China, Hunan                                            | Johns Hopkins University. 2019 Novel Coronavirus COVID-19 (2019-nCoV) Data Repository by Johns Hopkins CSSE. Baltimore, Maryland: Johns Hopkins University. |
| China, Inner Mongolia                                   | Johns Hopkins University. 2019 Novel Coronavirus COVID-19 (2019-nCoV) Data Repository by Johns Hopkins CSSE. Baltimore, Maryland: Johns Hopkins University. |
| China, Jiangsu                                          | Johns Hopkins University. 2019 Novel Coronavirus COVID-19 (2019-nCoV) Data Repository by Johns Hopkins CSSE. Baltimore, Maryland: Johns Hopkins University. |

|                                                     |                                                                                                                                                             |
|-----------------------------------------------------|-------------------------------------------------------------------------------------------------------------------------------------------------------------|
| China, Jiangxi                                      | Johns Hopkins University. 2019 Novel Coronavirus COVID-19 (2019-nCoV) Data Repository by Johns Hopkins CSSE. Baltimore, Maryland: Johns Hopkins University. |
| China, Jilin                                        | Johns Hopkins University. 2019 Novel Coronavirus COVID-19 (2019-nCoV) Data Repository by Johns Hopkins CSSE. Baltimore, Maryland: Johns Hopkins University. |
| China, Liaoning                                     | Johns Hopkins University. 2019 Novel Coronavirus COVID-19 (2019-nCoV) Data Repository by Johns Hopkins CSSE. Baltimore, Maryland: Johns Hopkins University. |
| China, Macao Special Administrative Region of China | Johns Hopkins University. 2019 Novel Coronavirus COVID-19 (2019-nCoV) Data Repository by Johns Hopkins CSSE. Baltimore, Maryland: Johns Hopkins University. |
| China, Ningxia                                      | Johns Hopkins University. 2019 Novel Coronavirus COVID-19 (2019-nCoV) Data Repository by Johns Hopkins CSSE. Baltimore, Maryland: Johns Hopkins University. |
| China, Qinghai                                      | Johns Hopkins University. 2019 Novel Coronavirus COVID-19 (2019-nCoV) Data Repository by Johns Hopkins CSSE. Baltimore, Maryland: Johns Hopkins University. |
| China, Shaanxi                                      | Johns Hopkins University. 2019 Novel Coronavirus COVID-19 (2019-nCoV) Data Repository by Johns Hopkins CSSE. Baltimore, Maryland: Johns Hopkins University. |
| China, Shandong                                     | Johns Hopkins University. 2019 Novel Coronavirus COVID-19 (2019-nCoV) Data Repository by Johns Hopkins CSSE. Baltimore, Maryland: Johns Hopkins University. |
| China, Shanghai                                     | Johns Hopkins University. 2019 Novel Coronavirus COVID-19 (2019-nCoV) Data Repository by Johns Hopkins CSSE. Baltimore, Maryland: Johns Hopkins University. |
| China, Shanxi                                       | Johns Hopkins University. 2019 Novel Coronavirus COVID-19 (2019-nCoV) Data Repository by Johns Hopkins CSSE. Baltimore, Maryland: Johns Hopkins University. |
| China, Sichuan                                      | Johns Hopkins University. 2019 Novel Coronavirus COVID-19 (2019-nCoV) Data Repository by Johns Hopkins CSSE. Baltimore, Maryland: Johns Hopkins University. |

|                     |                                                                                                                                                             |
|---------------------|-------------------------------------------------------------------------------------------------------------------------------------------------------------|
| China, Tianjin      | Johns Hopkins University. 2019 Novel Coronavirus COVID-19 (2019-nCoV) Data Repository by Johns Hopkins CSSE. Baltimore, Maryland: Johns Hopkins University. |
| China, Tibet        | Johns Hopkins University. 2019 Novel Coronavirus COVID-19 (2019-nCoV) Data Repository by Johns Hopkins CSSE. Baltimore, Maryland: Johns Hopkins University. |
| China, Xinjiang     | Johns Hopkins University. 2019 Novel Coronavirus COVID-19 (2019-nCoV) Data Repository by Johns Hopkins CSSE. Baltimore, Maryland: Johns Hopkins University. |
| China, Yunnan       | Johns Hopkins University. 2019 Novel Coronavirus COVID-19 (2019-nCoV) Data Repository by Johns Hopkins CSSE. Baltimore, Maryland: Johns Hopkins University. |
| China, Zhejiang     | Johns Hopkins University. 2019 Novel Coronavirus COVID-19 (2019-nCoV) Data Repository by Johns Hopkins CSSE. Baltimore, Maryland: Johns Hopkins University. |
| Colombia            | Johns Hopkins University. 2019 Novel Coronavirus COVID-19 (2019-nCoV) Data Repository by Johns Hopkins CSSE. Baltimore, Maryland: Johns Hopkins University. |
| Comoros             | Johns Hopkins University. 2019 Novel Coronavirus COVID-19 (2019-nCoV) Data Repository by Johns Hopkins CSSE. Baltimore, Maryland: Johns Hopkins University. |
| Congo (Brazzaville) | Johns Hopkins University. 2019 Novel Coronavirus COVID-19 (2019-nCoV) Data Repository by Johns Hopkins CSSE. Baltimore, Maryland: Johns Hopkins University. |
| Costa Rica          | Johns Hopkins University. 2019 Novel Coronavirus COVID-19 (2019-nCoV) Data Repository by Johns Hopkins CSSE. Baltimore, Maryland: Johns Hopkins University. |
| Côte d'Ivoire       | Johns Hopkins University. 2019 Novel Coronavirus COVID-19 (2019-nCoV) Data Repository by Johns Hopkins CSSE. Baltimore, Maryland: Johns Hopkins University. |
| Croatia             | Johns Hopkins University. 2019 Novel Coronavirus COVID-19 (2019-nCoV) Data Repository by Johns Hopkins CSSE. Baltimore, Maryland: Johns Hopkins University. |

|                    |                                                                                                                                                             |
|--------------------|-------------------------------------------------------------------------------------------------------------------------------------------------------------|
| Cuba               | Johns Hopkins University. 2019 Novel Coronavirus COVID-19 (2019-nCoV) Data Repository by Johns Hopkins CSSE. Baltimore, Maryland: Johns Hopkins University. |
| Cyprus             | Johns Hopkins University. 2019 Novel Coronavirus COVID-19 (2019-nCoV) Data Repository by Johns Hopkins CSSE. Baltimore, Maryland: Johns Hopkins University. |
| Czechia            | Johns Hopkins University. 2019 Novel Coronavirus COVID-19 (2019-nCoV) Data Repository by Johns Hopkins CSSE. Baltimore, Maryland: Johns Hopkins University. |
| Denmark            | Johns Hopkins University. 2019 Novel Coronavirus COVID-19 (2019-nCoV) Data Repository by Johns Hopkins CSSE. Baltimore, Maryland: Johns Hopkins University. |
| Djibouti           | Johns Hopkins University. 2019 Novel Coronavirus COVID-19 (2019-nCoV) Data Repository by Johns Hopkins CSSE. Baltimore, Maryland: Johns Hopkins University. |
| Dominica           | Johns Hopkins University. 2019 Novel Coronavirus COVID-19 (2019-nCoV) Data Repository by Johns Hopkins CSSE. Baltimore, Maryland: Johns Hopkins University. |
| Dominican Republic | Johns Hopkins University. 2019 Novel Coronavirus COVID-19 (2019-nCoV) Data Repository by Johns Hopkins CSSE. Baltimore, Maryland: Johns Hopkins University. |
| DR Congo           | Johns Hopkins University. 2019 Novel Coronavirus COVID-19 (2019-nCoV) Data Repository by Johns Hopkins CSSE. Baltimore, Maryland: Johns Hopkins University. |
| Ecuador            | Johns Hopkins University. 2019 Novel Coronavirus COVID-19 (2019-nCoV) Data Repository by Johns Hopkins CSSE. Baltimore, Maryland: Johns Hopkins University. |
| Egypt              | Johns Hopkins University. 2019 Novel Coronavirus COVID-19 (2019-nCoV) Data Repository by Johns Hopkins CSSE. Baltimore, Maryland: Johns Hopkins University. |
| El Salvador        | Johns Hopkins University. 2019 Novel Coronavirus COVID-19 (2019-nCoV) Data Repository by Johns Hopkins CSSE. Baltimore, Maryland: Johns Hopkins University. |



|                                |                                                                                                                                                             |
|--------------------------------|-------------------------------------------------------------------------------------------------------------------------------------------------------------|
| Equatorial Guinea              | Johns Hopkins University. 2019 Novel Coronavirus COVID-19 (2019-nCoV) Data Repository by Johns Hopkins CSSE. Baltimore, Maryland: Johns Hopkins University. |
| Eritrea                        | Johns Hopkins University. 2019 Novel Coronavirus COVID-19 (2019-nCoV) Data Repository by Johns Hopkins CSSE. Baltimore, Maryland: Johns Hopkins University. |
| Estonia                        | Johns Hopkins University. 2019 Novel Coronavirus COVID-19 (2019-nCoV) Data Repository by Johns Hopkins CSSE. Baltimore, Maryland: Johns Hopkins University. |
| Eswatini                       | Johns Hopkins University. 2019 Novel Coronavirus COVID-19 (2019-nCoV) Data Repository by Johns Hopkins CSSE. Baltimore, Maryland: Johns Hopkins University. |
| Ethiopia                       | Johns Hopkins University. 2019 Novel Coronavirus COVID-19 (2019-nCoV) Data Repository by Johns Hopkins CSSE. Baltimore, Maryland: Johns Hopkins University. |
| Federated States of Micronesia | Johns Hopkins University. 2019 Novel Coronavirus COVID-19 (2019-nCoV) Data Repository by Johns Hopkins CSSE. Baltimore, Maryland: Johns Hopkins University. |
| Fiji                           | Johns Hopkins University. 2019 Novel Coronavirus COVID-19 (2019-nCoV) Data Repository by Johns Hopkins CSSE. Baltimore, Maryland: Johns Hopkins University. |
| Finland                        | Johns Hopkins University. 2019 Novel Coronavirus COVID-19 (2019-nCoV) Data Repository by Johns Hopkins CSSE. Baltimore, Maryland: Johns Hopkins University. |
| France                         | Etalab (France), Ministry of Health (France), Ministry of Health and Solidarity (DRESS) (France). France COVID-19 Epidemic Monitoring Dashboard.            |
| Gabon                          | Johns Hopkins University. 2019 Novel Coronavirus COVID-19 (2019-nCoV) Data Repository by Johns Hopkins CSSE. Baltimore, Maryland: Johns Hopkins University. |
| Georgia                        | Johns Hopkins University. 2019 Novel Coronavirus COVID-19 (2019-nCoV) Data Repository by Johns Hopkins CSSE. Baltimore, Maryland: Johns Hopkins University. |

|                            |                                                                                                                                                    |
|----------------------------|----------------------------------------------------------------------------------------------------------------------------------------------------|
| Germany, Baden-Württemberg | Robert Koch Institute. Coronavirus Disease 2019 (COVID-19) Daily Situation Report - Robert Koch Institute. Berlin, Germany: Robert Koch Institute. |
| Germany, Baden-Württemberg | Wikipedia. COVID-19 pandemic in Germany. San Francisco, United States of America: Wikipedia.                                                       |
| Germany, Bavaria           | Robert Koch Institute. Coronavirus Disease 2019 (COVID-19) Daily Situation Report - Robert Koch Institute. Berlin, Germany: Robert Koch Institute. |
| Germany, Bavaria           | Wikipedia. COVID-19 pandemic in Germany. San Francisco, United States of America: Wikipedia.                                                       |
| Germany, Berlin            | Robert Koch Institute. Coronavirus Disease 2019 (COVID-19) Daily Situation Report - Robert Koch Institute. Berlin, Germany: Robert Koch Institute. |
| Germany, Berlin            | Wikipedia. COVID-19 pandemic in Germany. San Francisco, United States of America: Wikipedia.                                                       |
| Germany, Brandenburg       | Robert Koch Institute. Coronavirus Disease 2019 (COVID-19) Daily Situation Report - Robert Koch Institute. Berlin, Germany: Robert Koch Institute. |
| Germany, Brandenburg       | Wikipedia. COVID-19 pandemic in Germany. San Francisco, United States of America: Wikipedia.                                                       |
| Germany, Bremen            | Robert Koch Institute. Coronavirus Disease 2019 (COVID-19) Daily Situation Report - Robert Koch Institute. Berlin, Germany: Robert Koch Institute. |
| Germany, Bremen            | Wikipedia. COVID-19 pandemic in Germany. San Francisco, United States of America: Wikipedia.                                                       |
| Germany, Hamburg           | Robert Koch Institute. Coronavirus Disease 2019 (COVID-19) Daily Situation Report - Robert Koch Institute. Berlin, Germany: Robert Koch Institute. |
| Germany, Hamburg           | Wikipedia. COVID-19 pandemic in Germany. San Francisco, United States of America: Wikipedia.                                                       |

|                                 |                                                                                                                                                    |
|---------------------------------|----------------------------------------------------------------------------------------------------------------------------------------------------|
| Germany, Hesse                  | Robert Koch Institute. Coronavirus Disease 2019 (COVID-19) Daily Situation Report - Robert Koch Institute. Berlin, Germany: Robert Koch Institute. |
| Germany, Hesse                  | Wikipedia. COVID-19 pandemic in Germany. San Francisco, United States of America: Wikipedia.                                                       |
| Germany, Lower Saxony           | Robert Koch Institute. Coronavirus Disease 2019 (COVID-19) Daily Situation Report - Robert Koch Institute. Berlin, Germany: Robert Koch Institute. |
| Germany, Lower Saxony           | Wikipedia. COVID-19 pandemic in Germany. San Francisco, United States of America: Wikipedia.                                                       |
| Germany, Mecklenburg-Vorpommern | Robert Koch Institute. Coronavirus Disease 2019 (COVID-19) Daily Situation Report - Robert Koch Institute. Berlin, Germany: Robert Koch Institute. |
| Germany, Mecklenburg-Vorpommern | Wikipedia. COVID-19 pandemic in Germany. San Francisco, United States of America: Wikipedia.                                                       |
| Germany, North Rhine-Westphalia | Robert Koch Institute. Coronavirus Disease 2019 (COVID-19) Daily Situation Report - Robert Koch Institute. Berlin, Germany: Robert Koch Institute. |
| Germany, North Rhine-Westphalia | Wikipedia. COVID-19 pandemic in Germany. San Francisco, United States of America: Wikipedia.                                                       |
| Germany, Rhineland-Palatinate   | Robert Koch Institute. Coronavirus Disease 2019 (COVID-19) Daily Situation Report - Robert Koch Institute. Berlin, Germany: Robert Koch Institute. |
| Germany, Rhineland-Palatinate   | Wikipedia. COVID-19 pandemic in Germany. San Francisco, United States of America: Wikipedia.                                                       |
| Germany, Saarland               | Robert Koch Institute. Coronavirus Disease 2019 (COVID-19) Daily Situation Report - Robert Koch Institute. Berlin, Germany: Robert Koch Institute. |
| Germany, Saarland               | Wikipedia. COVID-19 pandemic in Germany. San Francisco, United States of America: Wikipedia.                                                       |

|                             |                                                                                                                                                             |
|-----------------------------|-------------------------------------------------------------------------------------------------------------------------------------------------------------|
| Germany, Saxony             | Robert Koch Institute. Coronavirus Disease 2019 (COVID-19) Daily Situation Report - Robert Koch Institute. Berlin, Germany: Robert Koch Institute.          |
| Germany, Saxony             | Wikipedia. COVID-19 pandemic in Germany. San Francisco, United States of America: Wikipedia.                                                                |
| Germany, Saxony-Anhalt      | Robert Koch Institute. Coronavirus Disease 2019 (COVID-19) Daily Situation Report - Robert Koch Institute. Berlin, Germany: Robert Koch Institute.          |
| Germany, Saxony-Anhalt      | Wikipedia. COVID-19 pandemic in Germany. San Francisco, United States of America: Wikipedia.                                                                |
| Germany, Schleswig-Holstein | Robert Koch Institute. Coronavirus Disease 2019 (COVID-19) Daily Situation Report - Robert Koch Institute. Berlin, Germany: Robert Koch Institute.          |
| Germany, Schleswig-Holstein | Wikipedia. COVID-19 pandemic in Germany. San Francisco, United States of America: Wikipedia.                                                                |
| Germany, Thuringia          | Robert Koch Institute. Coronavirus Disease 2019 (COVID-19) Daily Situation Report - Robert Koch Institute. Berlin, Germany: Robert Koch Institute.          |
| Germany, Thuringia          | Wikipedia. COVID-19 pandemic in Germany. San Francisco, United States of America: Wikipedia.                                                                |
| Ghana                       | Johns Hopkins University. 2019 Novel Coronavirus COVID-19 (2019-nCoV) Data Repository by Johns Hopkins CSSE. Baltimore, Maryland: Johns Hopkins University. |
| Greece                      | Johns Hopkins University. 2019 Novel Coronavirus COVID-19 (2019-nCoV) Data Repository by Johns Hopkins CSSE. Baltimore, Maryland: Johns Hopkins University. |
| Greenland                   | Johns Hopkins University. 2019 Novel Coronavirus COVID-19 (2019-nCoV) Data Repository by Johns Hopkins CSSE. Baltimore, Maryland: Johns Hopkins University. |
| Grenada                     | Johns Hopkins University. 2019 Novel Coronavirus COVID-19 (2019-nCoV) Data Repository by Johns Hopkins CSSE. Baltimore, Maryland: Johns Hopkins University. |

|                       |                                                                                                                                                             |
|-----------------------|-------------------------------------------------------------------------------------------------------------------------------------------------------------|
|                       |                                                                                                                                                             |
| Guam                  | Johns Hopkins University. 2019 Novel Coronavirus COVID-19 (2019-nCoV) Data Repository by Johns Hopkins CSSE. Baltimore, Maryland: Johns Hopkins University. |
| Guatemala             | Johns Hopkins University. 2019 Novel Coronavirus COVID-19 (2019-nCoV) Data Repository by Johns Hopkins CSSE. Baltimore, Maryland: Johns Hopkins University. |
| Guinea                | Johns Hopkins University. 2019 Novel Coronavirus COVID-19 (2019-nCoV) Data Repository by Johns Hopkins CSSE. Baltimore, Maryland: Johns Hopkins University. |
| Guinea-Bissau         | Johns Hopkins University. 2019 Novel Coronavirus COVID-19 (2019-nCoV) Data Repository by Johns Hopkins CSSE. Baltimore, Maryland: Johns Hopkins University. |
| Guyana                | Johns Hopkins University. 2019 Novel Coronavirus COVID-19 (2019-nCoV) Data Repository by Johns Hopkins CSSE. Baltimore, Maryland: Johns Hopkins University. |
| Haiti                 | Johns Hopkins University. 2019 Novel Coronavirus COVID-19 (2019-nCoV) Data Repository by Johns Hopkins CSSE. Baltimore, Maryland: Johns Hopkins University. |
| Honduras              | Johns Hopkins University. 2019 Novel Coronavirus COVID-19 (2019-nCoV) Data Repository by Johns Hopkins CSSE. Baltimore, Maryland: Johns Hopkins University. |
| Hungary               | Johns Hopkins University. 2019 Novel Coronavirus COVID-19 (2019-nCoV) Data Repository by Johns Hopkins CSSE. Baltimore, Maryland: Johns Hopkins University. |
| Iceland               | Johns Hopkins University. 2019 Novel Coronavirus COVID-19 (2019-nCoV) Data Repository by Johns Hopkins CSSE. Baltimore, Maryland: Johns Hopkins University. |
| India, Andhra Pradesh | COVID-19 India. India COVID-19 Crowdsourced Patient Database: National Level Time Series, State-Wise Stats and Test Counts. India: COVID-19 India.          |
| India, Andhra Pradesh | COVID-19 India. India COVID-19 Crowdsourced Patient Database: State Level Daily Changes. India: COVID-19 India.                                             |

|                                                 |                                                                                                                                                    |
|-------------------------------------------------|----------------------------------------------------------------------------------------------------------------------------------------------------|
|                                                 |                                                                                                                                                    |
| India, Arunachal Pradesh                        | COVID-19 India. India COVID-19 Crowdsourced Patient Database: National Level Time Series, State-Wise Stats and Test Counts. India: COVID-19 India. |
| India, Arunachal Pradesh                        | COVID-19 India. India COVID-19 Crowdsourced Patient Database: State Level Daily Changes. India: COVID-19 India.                                    |
| India, Assam                                    | COVID-19 India. India COVID-19 Crowdsourced Patient Database: National Level Time Series, State-Wise Stats and Test Counts. India: COVID-19 India. |
| India, Assam                                    | COVID-19 India. India COVID-19 Crowdsourced Patient Database: State Level Daily Changes. India: COVID-19 India.                                    |
| India, Bihar                                    | COVID-19 India. India COVID-19 Crowdsourced Patient Database: National Level Time Series, State-Wise Stats and Test Counts. India: COVID-19 India. |
| India, Bihar                                    | COVID-19 India. India COVID-19 Crowdsourced Patient Database: State Level Daily Changes. India: COVID-19 India.                                    |
| India, Chhattisgarh                             | COVID-19 India. India COVID-19 Crowdsourced Patient Database: National Level Time Series, State-Wise Stats and Test Counts. India: COVID-19 India. |
| India, Chhattisgarh                             | COVID-19 India. India COVID-19 Crowdsourced Patient Database: State Level Daily Changes. India: COVID-19 India.                                    |
| India, Dadra and Nagar Haveli and Daman and Diu | COVID-19 India. India COVID-19 Crowdsourced Patient Database: National Level Time Series, State-Wise Stats and Test Counts. India: COVID-19 India. |
| India, Dadra and Nagar Haveli and Daman and Diu | COVID-19 India. India COVID-19 Crowdsourced Patient Database: State Level Daily Changes. India: COVID-19 India.                                    |
| India, Delhi                                    | COVID-19 India. India COVID-19 Crowdsourced Patient Database: National Level Time Series, State-Wise Stats and Test Counts. India: COVID-19 India. |
| India, Delhi                                    | COVID-19 India. India COVID-19 Crowdsourced Patient Database: State Level Daily Changes. India: COVID-19 India.                                    |

|                                   |                                                                                                                                                    |
|-----------------------------------|----------------------------------------------------------------------------------------------------------------------------------------------------|
|                                   |                                                                                                                                                    |
| India, Goa                        | COVID-19 India. India COVID-19 Crowdsourced Patient Database: National Level Time Series, State-Wise Stats and Test Counts. India: COVID-19 India. |
| India, Goa                        | COVID-19 India. India COVID-19 Crowdsourced Patient Database: State Level Daily Changes. India: COVID-19 India.                                    |
| India, Gujarat                    | COVID-19 India. India COVID-19 Crowdsourced Patient Database: National Level Time Series, State-Wise Stats and Test Counts. India: COVID-19 India. |
| India, Gujarat                    | COVID-19 India. India COVID-19 Crowdsourced Patient Database: State Level Daily Changes. India: COVID-19 India.                                    |
| India, Haryana                    | COVID-19 India. India COVID-19 Crowdsourced Patient Database: National Level Time Series, State-Wise Stats and Test Counts. India: COVID-19 India. |
| India, Haryana                    | COVID-19 India. India COVID-19 Crowdsourced Patient Database: State Level Daily Changes. India: COVID-19 India.                                    |
| India, Himachal Pradesh           | COVID-19 India. India COVID-19 Crowdsourced Patient Database: National Level Time Series, State-Wise Stats and Test Counts. India: COVID-19 India. |
| India, Himachal Pradesh           | COVID-19 India. India COVID-19 Crowdsourced Patient Database: State Level Daily Changes. India: COVID-19 India.                                    |
| India, Jammu & Kashmir and Ladakh | COVID-19 India. India COVID-19 Crowdsourced Patient Database: National Level Time Series, State-Wise Stats and Test Counts. India: COVID-19 India. |
| India, Jammu & Kashmir and Ladakh | COVID-19 India. India COVID-19 Crowdsourced Patient Database: State Level Daily Changes. India: COVID-19 India.                                    |
| India, Jharkhand                  | COVID-19 India. India COVID-19 Crowdsourced Patient Database: National Level Time Series, State-Wise Stats and Test Counts. India: COVID-19 India. |
| India, Jharkhand                  | COVID-19 India. India COVID-19 Crowdsourced Patient Database: State Level Daily Changes. India: COVID-19 India.                                    |

|                       |                                                                                                                                                    |
|-----------------------|----------------------------------------------------------------------------------------------------------------------------------------------------|
|                       |                                                                                                                                                    |
| India, Karnataka      | COVID-19 India. India COVID-19 Crowdsourced Patient Database: National Level Time Series, State-Wise Stats and Test Counts. India: COVID-19 India. |
| India, Karnataka      | COVID-19 India. India COVID-19 Crowdsourced Patient Database: State Level Daily Changes. India: COVID-19 India.                                    |
| India, Kerala         | COVID-19 India. India COVID-19 Crowdsourced Patient Database: National Level Time Series, State-Wise Stats and Test Counts. India: COVID-19 India. |
| India, Kerala         | COVID-19 India. India COVID-19 Crowdsourced Patient Database: State Level Daily Changes. India: COVID-19 India.                                    |
| India, Madhya Pradesh | COVID-19 India. India COVID-19 Crowdsourced Patient Database: National Level Time Series, State-Wise Stats and Test Counts. India: COVID-19 India. |
| India, Madhya Pradesh | COVID-19 India. India COVID-19 Crowdsourced Patient Database: State Level Daily Changes. India: COVID-19 India.                                    |
| India, Maharashtra    | COVID-19 India. India COVID-19 Crowdsourced Patient Database: National Level Time Series, State-Wise Stats and Test Counts. India: COVID-19 India. |
| India, Maharashtra    | COVID-19 India. India COVID-19 Crowdsourced Patient Database: State Level Daily Changes. India: COVID-19 India.                                    |
| India, Manipur        | COVID-19 India. India COVID-19 Crowdsourced Patient Database: National Level Time Series, State-Wise Stats and Test Counts. India: COVID-19 India. |
| India, Manipur        | COVID-19 India. India COVID-19 Crowdsourced Patient Database: State Level Daily Changes. India: COVID-19 India.                                    |
| India, Meghalaya      | COVID-19 India. India COVID-19 Crowdsourced Patient Database: National Level Time Series, State-Wise Stats and Test Counts. India: COVID-19 India. |
| India, Meghalaya      | COVID-19 India. India COVID-19 Crowdsourced Patient Database: State Level Daily Changes. India: COVID-19 India.                                    |



|                  |                                                                                                                                                    |
|------------------|----------------------------------------------------------------------------------------------------------------------------------------------------|
|                  |                                                                                                                                                    |
| India, Mizoram   | COVID-19 India. India COVID-19 Crowdsourced Patient Database: National Level Time Series, State-Wise Stats and Test Counts. India: COVID-19 India. |
| India, Mizoram   | COVID-19 India. India COVID-19 Crowdsourced Patient Database: State Level Daily Changes. India: COVID-19 India.                                    |
| India, Nagaland  | COVID-19 India. India COVID-19 Crowdsourced Patient Database: National Level Time Series, State-Wise Stats and Test Counts. India: COVID-19 India. |
| India, Nagaland  | COVID-19 India. India COVID-19 Crowdsourced Patient Database: State Level Daily Changes. India: COVID-19 India.                                    |
| India, Odisha    | COVID-19 India. India COVID-19 Crowdsourced Patient Database: National Level Time Series, State-Wise Stats and Test Counts. India: COVID-19 India. |
| India, Odisha    | COVID-19 India. India COVID-19 Crowdsourced Patient Database: State Level Daily Changes. India: COVID-19 India.                                    |
| India, Punjab    | COVID-19 India. India COVID-19 Crowdsourced Patient Database: National Level Time Series, State-Wise Stats and Test Counts. India: COVID-19 India. |
| India, Punjab    | COVID-19 India. India COVID-19 Crowdsourced Patient Database: State Level Daily Changes. India: COVID-19 India.                                    |
| India, Rajasthan | COVID-19 India. India COVID-19 Crowdsourced Patient Database: National Level Time Series, State-Wise Stats and Test Counts. India: COVID-19 India. |
| India, Rajasthan | COVID-19 India. India COVID-19 Crowdsourced Patient Database: State Level Daily Changes. India: COVID-19 India.                                    |
| India, Sikkim    | COVID-19 India. India COVID-19 Crowdsourced Patient Database: National Level Time Series, State-Wise Stats and Test Counts. India: COVID-19 India. |
| India, Sikkim    | COVID-19 India. India COVID-19 Crowdsourced Patient Database: State Level Daily Changes. India: COVID-19 India.                                    |

|                      |                                                                                                                                                    |
|----------------------|----------------------------------------------------------------------------------------------------------------------------------------------------|
|                      |                                                                                                                                                    |
| India, Tamil Nadu    | COVID-19 India. India COVID-19 Crowdsourced Patient Database: National Level Time Series, State-Wise Stats and Test Counts. India: COVID-19 India. |
| India, Tamil Nadu    | COVID-19 India. India COVID-19 Crowdsourced Patient Database: State Level Daily Changes. India: COVID-19 India.                                    |
| India, Telangana     | COVID-19 India. India COVID-19 Crowdsourced Patient Database: National Level Time Series, State-Wise Stats and Test Counts. India: COVID-19 India. |
| India, Telangana     | COVID-19 India. India COVID-19 Crowdsourced Patient Database: State Level Daily Changes. India: COVID-19 India.                                    |
| India, Tripura       | COVID-19 India. India COVID-19 Crowdsourced Patient Database: National Level Time Series, State-Wise Stats and Test Counts. India: COVID-19 India. |
| India, Tripura       | COVID-19 India. India COVID-19 Crowdsourced Patient Database: State Level Daily Changes. India: COVID-19 India.                                    |
| India, Uttar Pradesh | COVID-19 India. India COVID-19 Crowdsourced Patient Database: National Level Time Series, State-Wise Stats and Test Counts. India: COVID-19 India. |
| India, Uttar Pradesh | COVID-19 India. India COVID-19 Crowdsourced Patient Database: State Level Daily Changes. India: COVID-19 India.                                    |
| India, Uttarakhand   | COVID-19 India. India COVID-19 Crowdsourced Patient Database: National Level Time Series, State-Wise Stats and Test Counts. India: COVID-19 India. |
| India, Uttarakhand   | COVID-19 India. India COVID-19 Crowdsourced Patient Database: State Level Daily Changes. India: COVID-19 India.                                    |
| India, West Bengal   | COVID-19 India. India COVID-19 Crowdsourced Patient Database: National Level Time Series, State-Wise Stats and Test Counts. India: COVID-19 India. |
| India, West Bengal   | COVID-19 India. India COVID-19 Crowdsourced Patient Database: State Level Daily Changes. India: COVID-19 India.                                    |

|                              |                                                                                                                                                                    |
|------------------------------|--------------------------------------------------------------------------------------------------------------------------------------------------------------------|
|                              |                                                                                                                                                                    |
| Indonesia                    | Johns Hopkins University. 2019 Novel Coronavirus COVID-19 (2019-nCoV) Data Repository by Johns Hopkins CSSE. Baltimore, Maryland: Johns Hopkins University.        |
| Iran                         | Johns Hopkins University. 2019 Novel Coronavirus COVID-19 (2019-nCoV) Data Repository by Johns Hopkins CSSE. Baltimore, Maryland: Johns Hopkins University.        |
| Iraq                         | Johns Hopkins University. 2019 Novel Coronavirus COVID-19 (2019-nCoV) Data Repository by Johns Hopkins CSSE. Baltimore, Maryland: Johns Hopkins University.        |
| Ireland                      | Johns Hopkins University. 2019 Novel Coronavirus COVID-19 (2019-nCoV) Data Repository by Johns Hopkins CSSE. Baltimore, Maryland: Johns Hopkins University.        |
| Israel                       | Johns Hopkins University. 2019 Novel Coronavirus COVID-19 (2019-nCoV) Data Repository by Johns Hopkins CSSE. Baltimore, Maryland: Johns Hopkins University.        |
| Italy, Abruzzo               | Department of Civil Protection (Italy). Italy COVID-19 Situation Monitoring - Department of Civil Protection. Rome, Italy: Department of Civil Protection (Italy). |
| Italy, Basilicata            | Department of Civil Protection (Italy). Italy COVID-19 Situation Monitoring - Department of Civil Protection. Rome, Italy: Department of Civil Protection (Italy). |
| Italy, Calabria              | Department of Civil Protection (Italy). Italy COVID-19 Situation Monitoring - Department of Civil Protection. Rome, Italy: Department of Civil Protection (Italy). |
| Italy, Campania              | Department of Civil Protection (Italy). Italy COVID-19 Situation Monitoring - Department of Civil Protection. Rome, Italy: Department of Civil Protection (Italy). |
| Italy, Emilia-Romagna        | Department of Civil Protection (Italy). Italy COVID-19 Situation Monitoring - Department of Civil Protection. Rome, Italy: Department of Civil Protection (Italy). |
| Italy, Friuli-Venezia Giulia | Department of Civil Protection (Italy). Italy COVID-19 Situation Monitoring - Department of Civil Protection. Rome,                                                |

|                                  |                                                                                                                                                                    |
|----------------------------------|--------------------------------------------------------------------------------------------------------------------------------------------------------------------|
|                                  | Italy: Department of Civil Protection (Italy).                                                                                                                     |
| Italy, Lazio                     | Department of Civil Protection (Italy). Italy COVID-19 Situation Monitoring - Department of Civil Protection. Rome, Italy: Department of Civil Protection (Italy). |
| Italy, Liguria                   | Department of Civil Protection (Italy). Italy COVID-19 Situation Monitoring - Department of Civil Protection. Rome, Italy: Department of Civil Protection (Italy). |
| Italy, Lombardia                 | Department of Civil Protection (Italy). Italy COVID-19 Situation Monitoring - Department of Civil Protection. Rome, Italy: Department of Civil Protection (Italy). |
| Italy, Marche                    | Department of Civil Protection (Italy). Italy COVID-19 Situation Monitoring - Department of Civil Protection. Rome, Italy: Department of Civil Protection (Italy). |
| Italy, Molise                    | Department of Civil Protection (Italy). Italy COVID-19 Situation Monitoring - Department of Civil Protection. Rome, Italy: Department of Civil Protection (Italy). |
| Italy, Piemonte                  | Department of Civil Protection (Italy). Italy COVID-19 Situation Monitoring - Department of Civil Protection. Rome, Italy: Department of Civil Protection (Italy). |
| Italy, Prov. autonoma di Bolzano | Department of Civil Protection (Italy). Italy COVID-19 Situation Monitoring - Department of Civil Protection. Rome, Italy: Department of Civil Protection (Italy). |
| Italy, Prov. autonoma di Trento  | Department of Civil Protection (Italy). Italy COVID-19 Situation Monitoring - Department of Civil Protection. Rome, Italy: Department of Civil Protection (Italy). |
| Italy, Puglia                    | Department of Civil Protection (Italy). Italy COVID-19 Situation Monitoring - Department of Civil Protection. Rome, Italy: Department of Civil Protection (Italy). |
| Italy, Sardegna                  | Department of Civil Protection (Italy). Italy COVID-19 Situation Monitoring - Department of Civil Protection. Rome, Italy: Department of Civil Protection (Italy). |

|                      |                                                                                                                                                                    |
|----------------------|--------------------------------------------------------------------------------------------------------------------------------------------------------------------|
| Italy, Sicilia       | Department of Civil Protection (Italy). Italy COVID-19 Situation Monitoring - Department of Civil Protection. Rome, Italy: Department of Civil Protection (Italy). |
| Italy, Toscana       | Department of Civil Protection (Italy). Italy COVID-19 Situation Monitoring - Department of Civil Protection. Rome, Italy: Department of Civil Protection (Italy). |
| Italy, Umbria        | Department of Civil Protection (Italy). Italy COVID-19 Situation Monitoring - Department of Civil Protection. Rome, Italy: Department of Civil Protection (Italy). |
| Italy, Valle d'Aosta | Department of Civil Protection (Italy). Italy COVID-19 Situation Monitoring - Department of Civil Protection. Rome, Italy: Department of Civil Protection (Italy). |
| Italy, Veneto        | Department of Civil Protection (Italy). Italy COVID-19 Situation Monitoring - Department of Civil Protection. Rome, Italy: Department of Civil Protection (Italy). |
| Jamaica              | Johns Hopkins University. 2019 Novel Coronavirus COVID-19 (2019-nCoV) Data Repository by Johns Hopkins CSSE. Baltimore, Maryland: Johns Hopkins University.        |
| Japan                | Ministry of Health, Labour and Welfare (Japan). Japan Coronavirus Disease (COVID-19) Situation Report.                                                             |
| Jordan               | Johns Hopkins University. 2019 Novel Coronavirus COVID-19 (2019-nCoV) Data Repository by Johns Hopkins CSSE. Baltimore, Maryland: Johns Hopkins University.        |
| Kazakhstan           | *                                                                                                                                                                  |
| Kenya                | Johns Hopkins University. 2019 Novel Coronavirus COVID-19 (2019-nCoV) Data Repository by Johns Hopkins CSSE. Baltimore, Maryland: Johns Hopkins University.        |
| Kiribati             | Johns Hopkins University. 2019 Novel Coronavirus COVID-19 (2019-nCoV) Data Repository by Johns Hopkins CSSE. Baltimore, Maryland: Johns Hopkins University.        |
| Kuwait               | Johns Hopkins University. 2019 Novel Coronavirus COVID-19 (2019-nCoV) Data Repository by Johns Hopkins CSSE. Baltimore, Maryland: Johns Hopkins University.        |

|            |                                                                                                                                                             |
|------------|-------------------------------------------------------------------------------------------------------------------------------------------------------------|
| Kyrgyzstan | Johns Hopkins University. 2019 Novel Coronavirus COVID-19 (2019-nCoV) Data Repository by Johns Hopkins CSSE. Baltimore, Maryland: Johns Hopkins University. |
| Laos       | Johns Hopkins University. 2019 Novel Coronavirus COVID-19 (2019-nCoV) Data Repository by Johns Hopkins CSSE. Baltimore, Maryland: Johns Hopkins University. |
| Latvia     | Johns Hopkins University. 2019 Novel Coronavirus COVID-19 (2019-nCoV) Data Repository by Johns Hopkins CSSE. Baltimore, Maryland: Johns Hopkins University. |
| Lebanon    | Johns Hopkins University. 2019 Novel Coronavirus COVID-19 (2019-nCoV) Data Repository by Johns Hopkins CSSE. Baltimore, Maryland: Johns Hopkins University. |
| Lesotho    | Johns Hopkins University. 2019 Novel Coronavirus COVID-19 (2019-nCoV) Data Repository by Johns Hopkins CSSE. Baltimore, Maryland: Johns Hopkins University. |
| Liberia    | Johns Hopkins University. 2019 Novel Coronavirus COVID-19 (2019-nCoV) Data Repository by Johns Hopkins CSSE. Baltimore, Maryland: Johns Hopkins University. |
| Libya      | Johns Hopkins University. 2019 Novel Coronavirus COVID-19 (2019-nCoV) Data Repository by Johns Hopkins CSSE. Baltimore, Maryland: Johns Hopkins University. |
| Lithuania  | Johns Hopkins University. 2019 Novel Coronavirus COVID-19 (2019-nCoV) Data Repository by Johns Hopkins CSSE. Baltimore, Maryland: Johns Hopkins University. |
| Luxembourg | Johns Hopkins University. 2019 Novel Coronavirus COVID-19 (2019-nCoV) Data Repository by Johns Hopkins CSSE. Baltimore, Maryland: Johns Hopkins University. |
| Madagascar | Johns Hopkins University. 2019 Novel Coronavirus COVID-19 (2019-nCoV) Data Repository by Johns Hopkins CSSE. Baltimore, Maryland: Johns Hopkins University. |
| Malawi     | Johns Hopkins University. 2019 Novel Coronavirus COVID-19 (2019-nCoV) Data Repository by Johns Hopkins CSSE. Baltimore, Maryland: Johns Hopkins University. |

|                             |                                                                                                                                                                    |
|-----------------------------|--------------------------------------------------------------------------------------------------------------------------------------------------------------------|
| Malaysia                    | Johns Hopkins University. 2019 Novel Coronavirus COVID-19 (2019-nCoV) Data Repository by Johns Hopkins CSSE. Baltimore, Maryland: Johns Hopkins University.        |
| Maldives                    | Johns Hopkins University. 2019 Novel Coronavirus COVID-19 (2019-nCoV) Data Repository by Johns Hopkins CSSE. Baltimore, Maryland: Johns Hopkins University.        |
| Mali                        | Johns Hopkins University. 2019 Novel Coronavirus COVID-19 (2019-nCoV) Data Repository by Johns Hopkins CSSE. Baltimore, Maryland: Johns Hopkins University.        |
| Malta                       | Johns Hopkins University. 2019 Novel Coronavirus COVID-19 (2019-nCoV) Data Repository by Johns Hopkins CSSE. Baltimore, Maryland: Johns Hopkins University.        |
| Marshall Islands            | Johns Hopkins University. 2019 Novel Coronavirus COVID-19 (2019-nCoV) Data Repository by Johns Hopkins CSSE. Baltimore, Maryland: Johns Hopkins University.        |
| Mauritania                  | Johns Hopkins University. 2019 Novel Coronavirus COVID-19 (2019-nCoV) Data Repository by Johns Hopkins CSSE. Baltimore, Maryland: Johns Hopkins University.        |
| Mauritius                   | Johns Hopkins University. 2019 Novel Coronavirus COVID-19 (2019-nCoV) Data Repository by Johns Hopkins CSSE. Baltimore, Maryland: Johns Hopkins University.        |
| Mexico, Aguascalientes      | Directorate General of Epidemiology, Secretariat of Health (Mexico), National Institute of Statistics and Geography (INEGI) (Mexico). Mexico COVID-19 Deaths 2020. |
| Mexico, Baja California     | Directorate General of Epidemiology, Secretariat of Health (Mexico), National Institute of Statistics and Geography (INEGI) (Mexico). Mexico COVID-19 Deaths 2020. |
| Mexico, Baja California Sur | Directorate General of Epidemiology, Secretariat of Health (Mexico), National Institute of Statistics and Geography (INEGI) (Mexico). Mexico COVID-19 Deaths 2020. |
| Mexico, Campeche            | Directorate General of Epidemiology, Secretariat of Health (Mexico), National Institute of Statistics and Geography (INEGI) (Mexico). Mexico COVID-19 Deaths 2020. |
| Mexico, Chiapas             | Directorate General of Epidemiology, Secretariat of Health (Mexico), National Institute of Statistics and Geography (INEGI) (Mexico). Mexico COVID-19 Deaths 2020. |
| Mexico, Chihuahua           | Directorate General of Epidemiology, Secretariat of Health (Mexico), National Institute of Statistics and Geography (INEGI) (Mexico). Mexico COVID-19 Deaths 2020. |

|                             |                                                                                                                                                                    |
|-----------------------------|--------------------------------------------------------------------------------------------------------------------------------------------------------------------|
| Mexico, Coahuila            | Directorate General of Epidemiology, Secretariat of Health (Mexico), National Institute of Statistics and Geography (INEGI) (Mexico). Mexico COVID-19 Deaths 2020. |
| Mexico, Colima              | Directorate General of Epidemiology, Secretariat of Health (Mexico), National Institute of Statistics and Geography (INEGI) (Mexico). Mexico COVID-19 Deaths 2020. |
| Mexico, Durango             | Directorate General of Epidemiology, Secretariat of Health (Mexico), National Institute of Statistics and Geography (INEGI) (Mexico). Mexico COVID-19 Deaths 2020. |
| Mexico, Guanajuato          | Directorate General of Epidemiology, Secretariat of Health (Mexico), National Institute of Statistics and Geography (INEGI) (Mexico). Mexico COVID-19 Deaths 2020. |
| Mexico, Guerrero            | Directorate General of Epidemiology, Secretariat of Health (Mexico), National Institute of Statistics and Geography (INEGI) (Mexico). Mexico COVID-19 Deaths 2020. |
| Mexico, Hidalgo             | Directorate General of Epidemiology, Secretariat of Health (Mexico), National Institute of Statistics and Geography (INEGI) (Mexico). Mexico COVID-19 Deaths 2020. |
| Mexico, Jalisco             | Directorate General of Epidemiology, Secretariat of Health (Mexico), National Institute of Statistics and Geography (INEGI) (Mexico). Mexico COVID-19 Deaths 2020. |
| Mexico, México              | Directorate General of Epidemiology, Secretariat of Health (Mexico), National Institute of Statistics and Geography (INEGI) (Mexico). Mexico COVID-19 Deaths 2020. |
| Mexico, Mexico City         | Directorate General of Epidemiology, Secretariat of Health (Mexico), National Institute of Statistics and Geography (INEGI) (Mexico). Mexico COVID-19 Deaths 2020. |
| Mexico, Michoacán de Ocampo | Directorate General of Epidemiology, Secretariat of Health (Mexico), National Institute of Statistics and Geography (INEGI) (Mexico). Mexico COVID-19 Deaths 2020. |
| Mexico, Morelos             | Directorate General of Epidemiology, Secretariat of Health (Mexico), National Institute of Statistics and Geography (INEGI) (Mexico). Mexico COVID-19 Deaths 2020. |
| Mexico, Nayarit             | Directorate General of Epidemiology, Secretariat of Health (Mexico), National Institute of Statistics and Geography (INEGI) (Mexico). Mexico COVID-19 Deaths 2020. |
| Mexico, Nuevo León          | Directorate General of Epidemiology, Secretariat of Health (Mexico), National Institute of Statistics and Geography (INEGI) (Mexico). Mexico COVID-19 Deaths 2020. |
| Mexico, Oaxaca              | Directorate General of Epidemiology, Secretariat of Health (Mexico), National Institute of Statistics and Geography (INEGI) (Mexico). Mexico COVID-19 Deaths 2020. |
| Mexico, Puebla              | Directorate General of Epidemiology, Secretariat of Health (Mexico), National Institute of Statistics and Geography (INEGI) (Mexico). Mexico COVID-19 Deaths 2020. |
| Mexico, Querétaro           | Directorate General of Epidemiology, Secretariat of Health (Mexico), National Institute of Statistics and Geography (INEGI) (Mexico). Mexico COVID-19 Deaths 2020. |
| Mexico, Quintana Roo        | Directorate General of Epidemiology, Secretariat of Health (Mexico), National Institute of Statistics and Geography (INEGI) (Mexico). Mexico COVID-19 Deaths 2020. |
| Mexico, San Luis Potosí     | Directorate General of Epidemiology, Secretariat of Health (Mexico), National Institute of Statistics and Geography (INEGI) (Mexico). Mexico COVID-19 Deaths 2020. |



|                                         |                                                                                                                                                                    |
|-----------------------------------------|--------------------------------------------------------------------------------------------------------------------------------------------------------------------|
| Mexico, Sinaloa                         | Directorate General of Epidemiology, Secretariat of Health (Mexico), National Institute of Statistics and Geography (INEGI) (Mexico). Mexico COVID-19 Deaths 2020. |
| Mexico, Sonora                          | Directorate General of Epidemiology, Secretariat of Health (Mexico), National Institute of Statistics and Geography (INEGI) (Mexico). Mexico COVID-19 Deaths 2020. |
| Mexico, Tabasco                         | Directorate General of Epidemiology, Secretariat of Health (Mexico), National Institute of Statistics and Geography (INEGI) (Mexico). Mexico COVID-19 Deaths 2020. |
| Mexico, Tamaulipas                      | Directorate General of Epidemiology, Secretariat of Health (Mexico), National Institute of Statistics and Geography (INEGI) (Mexico). Mexico COVID-19 Deaths 2020. |
| Mexico, Tlaxcala                        | Directorate General of Epidemiology, Secretariat of Health (Mexico), National Institute of Statistics and Geography (INEGI) (Mexico). Mexico COVID-19 Deaths 2020. |
| Mexico, Veracruz de Ignacio de la Llave | Directorate General of Epidemiology, Secretariat of Health (Mexico), National Institute of Statistics and Geography (INEGI) (Mexico). Mexico COVID-19 Deaths 2020. |
| Mexico, Yucatán                         | Directorate General of Epidemiology, Secretariat of Health (Mexico), National Institute of Statistics and Geography (INEGI) (Mexico). Mexico COVID-19 Deaths 2020. |
| Mexico, Zacatecas                       | Directorate General of Epidemiology, Secretariat of Health (Mexico), National Institute of Statistics and Geography (INEGI) (Mexico). Mexico COVID-19 Deaths 2020. |
| Moldova                                 | Johns Hopkins University. 2019 Novel Coronavirus COVID-19 (2019-nCoV) Data Repository by Johns Hopkins CSSE. Baltimore, Maryland: Johns Hopkins University.        |
| Monaco                                  | Johns Hopkins University. 2019 Novel Coronavirus COVID-19 (2019-nCoV) Data Repository by Johns Hopkins CSSE. Baltimore, Maryland: Johns Hopkins University.        |
| Mongolia                                | Johns Hopkins University. 2019 Novel Coronavirus COVID-19 (2019-nCoV) Data Repository by Johns Hopkins CSSE. Baltimore, Maryland: Johns Hopkins University.        |
| Montenegro                              | Johns Hopkins University. 2019 Novel Coronavirus COVID-19 (2019-nCoV) Data Repository by Johns Hopkins CSSE. Baltimore, Maryland: Johns Hopkins University.        |
| Morocco                                 | Johns Hopkins University. 2019 Novel Coronavirus COVID-19 (2019-nCoV) Data Repository by Johns Hopkins CSSE. Baltimore, Maryland: Johns Hopkins University.        |
| Mozambique                              | Johns Hopkins University. 2019 Novel Coronavirus COVID-19 (2019-nCoV) Data Repository by Johns Hopkins CSSE. Baltimore, Maryland: Johns Hopkins University.        |

|                          |                                                                                                                                                             |
|--------------------------|-------------------------------------------------------------------------------------------------------------------------------------------------------------|
| Myanmar                  | Johns Hopkins University. 2019 Novel Coronavirus COVID-19 (2019-nCoV) Data Repository by Johns Hopkins CSSE. Baltimore, Maryland: Johns Hopkins University. |
| Namibia                  | Johns Hopkins University. 2019 Novel Coronavirus COVID-19 (2019-nCoV) Data Repository by Johns Hopkins CSSE. Baltimore, Maryland: Johns Hopkins University. |
| Nepal                    | Johns Hopkins University. 2019 Novel Coronavirus COVID-19 (2019-nCoV) Data Repository by Johns Hopkins CSSE. Baltimore, Maryland: Johns Hopkins University. |
| Netherlands              | Johns Hopkins University. 2019 Novel Coronavirus COVID-19 (2019-nCoV) Data Repository by Johns Hopkins CSSE. Baltimore, Maryland: Johns Hopkins University. |
| New Zealand              | Johns Hopkins University. 2019 Novel Coronavirus COVID-19 (2019-nCoV) Data Repository by Johns Hopkins CSSE. Baltimore, Maryland: Johns Hopkins University. |
| Nicaragua                | Johns Hopkins University. 2019 Novel Coronavirus COVID-19 (2019-nCoV) Data Repository by Johns Hopkins CSSE. Baltimore, Maryland: Johns Hopkins University. |
| Niger                    | Johns Hopkins University. 2019 Novel Coronavirus COVID-19 (2019-nCoV) Data Repository by Johns Hopkins CSSE. Baltimore, Maryland: Johns Hopkins University. |
| Nigeria                  | Johns Hopkins University. 2019 Novel Coronavirus COVID-19 (2019-nCoV) Data Repository by Johns Hopkins CSSE. Baltimore, Maryland: Johns Hopkins University. |
| North Macedonia          | Johns Hopkins University. 2019 Novel Coronavirus COVID-19 (2019-nCoV) Data Repository by Johns Hopkins CSSE. Baltimore, Maryland: Johns Hopkins University. |
| Northern Mariana Islands | Johns Hopkins University. 2019 Novel Coronavirus COVID-19 (2019-nCoV) Data Repository by Johns Hopkins CSSE. Baltimore, Maryland: Johns Hopkins University. |
| Norway                   | Johns Hopkins University. 2019 Novel Coronavirus COVID-19 (2019-nCoV) Data Repository by Johns Hopkins CSSE. Baltimore, Maryland: Johns Hopkins University. |

|                                       |                                                                                                                                                                                  |
|---------------------------------------|----------------------------------------------------------------------------------------------------------------------------------------------------------------------------------|
| Oman                                  | Johns Hopkins University. 2019 Novel Coronavirus COVID-19 (2019-nCoV) Data Repository by Johns Hopkins CSSE. Baltimore, Maryland: Johns Hopkins University.                      |
| Pakistan, Azad Jammu & Kashmir        | Ministry of National Health Services, Regulations & Coordination (Pakistan). Pakistan - Azad Jammu and Kashmir COVID-19 Statistics. Islamabad, Pakistan: Government of Pakistan. |
| Pakistan, Azad Jammu & Kashmir        | Ministry of National Health Services, Regulations & Coordination (Pakistan). Pakistan COVID-19 Dashboard.                                                                        |
| Pakistan, Balochistan                 | Ministry of National Health Services, Regulations & Coordination (Pakistan). Pakistan - Balochistan COVID-19 Statistics. Islamabad, Pakistan: Government of Pakistan.            |
| Pakistan, Balochistan                 | Ministry of National Health Services, Regulations & Coordination (Pakistan). Pakistan COVID-19 Dashboard.                                                                        |
| Pakistan, Gilgit-Baltistan            | Ministry of National Health Services, Regulations & Coordination (Pakistan). Pakistan - Gilgit-Baltistan COVID-19 Statistics. Islamabad, Pakistan: Government of Pakistan.       |
| Pakistan, Gilgit-Baltistan            | Ministry of National Health Services, Regulations & Coordination (Pakistan). Pakistan COVID-19 Dashboard.                                                                        |
| Pakistan, Islamabad Capital Territory | Ministry of National Health Services, Regulations & Coordination (Pakistan). Pakistan - Islāmābād COVID-19 Statistics. Islāmābād, Pakistan: Government of Pakistan.              |
| Pakistan, Islamabad Capital Territory | Ministry of National Health Services, Regulations & Coordination (Pakistan). Pakistan COVID-19 Dashboard.                                                                        |
| Pakistan, Khyber Pakhtunkhwa          | Ministry of National Health Services, Regulations & Coordination (Pakistan). Pakistan - Khyber Pakhtunkhwa COVID-19 Statistics 2020.                                             |
| Pakistan, Khyber Pakhtunkhwa          | Ministry of National Health Services, Regulations & Coordination (Pakistan). Pakistan COVID-19 Dashboard.                                                                        |
| Pakistan, Punjab                      | Ministry of National Health Services, Regulations & Coordination (Pakistan). Pakistan - Punjab COVID-19 Statistics. Islamabad, Pakistan: Government of Pakistan.                 |

|                  |                                                                                                                                                                                                                                                                      |
|------------------|----------------------------------------------------------------------------------------------------------------------------------------------------------------------------------------------------------------------------------------------------------------------|
|                  |                                                                                                                                                                                                                                                                      |
| Pakistan, Punjab | Ministry of National Health Services, Regulations & Coordination (Pakistan). Pakistan COVID-19 Dashboard.                                                                                                                                                            |
| Pakistan, Sindh  | Wikipedia. COVID-19 pandemic in Pakistan. San Francisco, United States of America: Wikipedia. Retrieved on April 29, 2021 from <a href="https://en.wikipedia.org/wiki/COVID-19_pandemic_in_Pakistan">https://en.wikipedia.org/wiki/COVID-19_pandemic_in_Pakistan</a> |
| Pakistan, Sindh  | Ministry of National Health Services, Regulations & Coordination (Pakistan). Pakistan - Sindh COVID-19 Statistics. Islamabad, Pakistan: Government of Pakistan.                                                                                                      |
| Pakistan, Sindh  | Ministry of National Health Services, Regulations & Coordination (Pakistan). Pakistan COVID-19 Dashboard.                                                                                                                                                            |
| Palau            | Johns Hopkins University. 2019 Novel Coronavirus COVID-19 (2019-nCoV) Data Repository by Johns Hopkins CSSE. Baltimore, Maryland: Johns Hopkins University.                                                                                                          |
| Palestine        | Johns Hopkins University. 2019 Novel Coronavirus COVID-19 (2019-nCoV) Data Repository by Johns Hopkins CSSE. Baltimore, Maryland: Johns Hopkins University.                                                                                                          |
| Panama           | Johns Hopkins University. 2019 Novel Coronavirus COVID-19 (2019-nCoV) Data Repository by Johns Hopkins CSSE. Baltimore, Maryland: Johns Hopkins University.                                                                                                          |
| Papua New Guinea | Johns Hopkins University. 2019 Novel Coronavirus COVID-19 (2019-nCoV) Data Repository by Johns Hopkins CSSE. Baltimore, Maryland: Johns Hopkins University.                                                                                                          |
| Paraguay         | Johns Hopkins University. 2019 Novel Coronavirus COVID-19 (2019-nCoV) Data Repository by Johns Hopkins CSSE. Baltimore, Maryland: Johns Hopkins University.                                                                                                          |
| Peru             | Ministry of Health (Peru), National Center for Epidemiology, Prevention and Disease Control (Peru). Peru Deaths by COVID-19.                                                                                                                                         |
| Philippines      | Department of Health (Philippines). Philippines Department of Health COVID-19 Tracker. Manila, Philippines: Department of Health (Philippines).                                                                                                                      |

|                                  |                                                                                                                                                                   |
|----------------------------------|-------------------------------------------------------------------------------------------------------------------------------------------------------------------|
|                                  |                                                                                                                                                                   |
| Poland                           | Johns Hopkins University. 2019 Novel Coronavirus COVID-19 (2019-nCoV) Data Repository by Johns Hopkins CSSE. Baltimore, Maryland: Johns Hopkins University.       |
| Portugal                         | Johns Hopkins University. 2019 Novel Coronavirus COVID-19 (2019-nCoV) Data Repository by Johns Hopkins CSSE. Baltimore, Maryland: Johns Hopkins University.       |
| Puerto Rico                      | Johns Hopkins University. 2019 Novel Coronavirus COVID-19 (2019-nCoV) Data Repository by Johns Hopkins CSSE. Baltimore, Maryland: Johns Hopkins University.       |
| Qatar                            | Johns Hopkins University. 2019 Novel Coronavirus COVID-19 (2019-nCoV) Data Repository by Johns Hopkins CSSE. Baltimore, Maryland: Johns Hopkins University.       |
| Romania                          | Johns Hopkins University. 2019 Novel Coronavirus COVID-19 (2019-nCoV) Data Repository by Johns Hopkins CSSE. Baltimore, Maryland: Johns Hopkins University.       |
| Russia                           | Federal State Statistics Service (Russia). Russia Natural Movement of the Population 2021. Moscow, Russian Federation: Federal State Statistics Service (Russia). |
| Rwanda                           | Johns Hopkins University. 2019 Novel Coronavirus COVID-19 (2019-nCoV) Data Repository by Johns Hopkins CSSE. Baltimore, Maryland: Johns Hopkins University.       |
| Saint Kitts and Nevis            | Johns Hopkins University. 2019 Novel Coronavirus COVID-19 (2019-nCoV) Data Repository by Johns Hopkins CSSE. Baltimore, Maryland: Johns Hopkins University.       |
| Saint Lucia                      | Johns Hopkins University. 2019 Novel Coronavirus COVID-19 (2019-nCoV) Data Repository by Johns Hopkins CSSE. Baltimore, Maryland: Johns Hopkins University.       |
| Saint Vincent and the Grenadines | Johns Hopkins University. 2019 Novel Coronavirus COVID-19 (2019-nCoV) Data Repository by Johns Hopkins CSSE. Baltimore, Maryland: Johns Hopkins University.       |
| Samoa                            | Johns Hopkins University. 2019 Novel Coronavirus COVID-19 (2019-nCoV) Data Repository by Johns Hopkins CSSE.                                                      |

|                       |                                                                                                                                                             |
|-----------------------|-------------------------------------------------------------------------------------------------------------------------------------------------------------|
|                       | Baltimore, Maryland: Johns Hopkins University.                                                                                                              |
| San Marino            | Johns Hopkins University. 2019 Novel Coronavirus COVID-19 (2019-nCoV) Data Repository by Johns Hopkins CSSE. Baltimore, Maryland: Johns Hopkins University. |
| São Tomé and Príncipe | Johns Hopkins University. 2019 Novel Coronavirus COVID-19 (2019-nCoV) Data Repository by Johns Hopkins CSSE. Baltimore, Maryland: Johns Hopkins University. |
| Saudi Arabia          | Johns Hopkins University. 2019 Novel Coronavirus COVID-19 (2019-nCoV) Data Repository by Johns Hopkins CSSE. Baltimore, Maryland: Johns Hopkins University. |
| Senegal               | Johns Hopkins University. 2019 Novel Coronavirus COVID-19 (2019-nCoV) Data Repository by Johns Hopkins CSSE. Baltimore, Maryland: Johns Hopkins University. |
| Serbia                | Johns Hopkins University. 2019 Novel Coronavirus COVID-19 (2019-nCoV) Data Repository by Johns Hopkins CSSE. Baltimore, Maryland: Johns Hopkins University. |
| Seychelles            | Johns Hopkins University. 2019 Novel Coronavirus COVID-19 (2019-nCoV) Data Repository by Johns Hopkins CSSE. Baltimore, Maryland: Johns Hopkins University. |
| Sierra Leone          | Johns Hopkins University. 2019 Novel Coronavirus COVID-19 (2019-nCoV) Data Repository by Johns Hopkins CSSE. Baltimore, Maryland: Johns Hopkins University. |
| Singapore             | Johns Hopkins University. 2019 Novel Coronavirus COVID-19 (2019-nCoV) Data Repository by Johns Hopkins CSSE. Baltimore, Maryland: Johns Hopkins University. |
| Slovakia              | Johns Hopkins University. 2019 Novel Coronavirus COVID-19 (2019-nCoV) Data Repository by Johns Hopkins CSSE. Baltimore, Maryland: Johns Hopkins University. |
| Slovenia              | Johns Hopkins University. 2019 Novel Coronavirus COVID-19 (2019-nCoV) Data Repository by Johns Hopkins CSSE. Baltimore, Maryland: Johns Hopkins University. |

|                  |                                                                                                                                                                                                                     |
|------------------|---------------------------------------------------------------------------------------------------------------------------------------------------------------------------------------------------------------------|
| Solomon Islands  | Johns Hopkins University. 2019 Novel Coronavirus COVID-19 (2019-nCoV) Data Repository by Johns Hopkins CSSE. Baltimore, Maryland: Johns Hopkins University.                                                         |
| Somalia          | Johns Hopkins University. 2019 Novel Coronavirus COVID-19 (2019-nCoV) Data Repository by Johns Hopkins CSSE. Baltimore, Maryland: Johns Hopkins University.                                                         |
| South Africa     | Johns Hopkins University. 2019 Novel Coronavirus COVID-19 (2019-nCoV) Data Repository by Johns Hopkins CSSE. Baltimore, Maryland: Johns Hopkins University.                                                         |
| South Korea      | Johns Hopkins University. 2019 Novel Coronavirus COVID-19 (2019-nCoV) Data Repository by Johns Hopkins CSSE. Baltimore, Maryland: Johns Hopkins University.                                                         |
| South Sudan      | Johns Hopkins University. 2019 Novel Coronavirus COVID-19 (2019-nCoV) Data Repository by Johns Hopkins CSSE. Baltimore, Maryland: Johns Hopkins University.                                                         |
| Spain, Andalusia | Andalusia Ministry of Health and Families (Spain). Spain - Andalusia Ministry of Health and Families Coronavirus Report.                                                                                            |
| Spain, Aragon    | Ministry of Health, Consumption and Social Welfare (Spain). Spain Ministry of Health, Consumption, and Social Welfare COVID-19 Situation Update. Spain: Ministry of Health, Consumption and Social Welfare (Spain). |
| Spain, Aragon    | Institute of Health Carlos III (Spain), Ministry of Health, Consumption and Social Welfare (Spain). Spain Carlos III Health Institute Situation of COVID-19. Madrid, Spain: Institute of Health Carlos III (Spain). |
| Spain, Asturias  | Ministry of Health, Consumption and Social Welfare (Spain). Spain Ministry of Health, Consumption, and Social Welfare COVID-19 Situation Update. Spain: Ministry of Health, Consumption and Social Welfare (Spain). |
| Spain, Asturias  | Institute of Health Carlos III (Spain), Ministry of Health, Consumption and Social Welfare (Spain). Spain Carlos III Health Institute Situation of COVID-19. Madrid, Spain: Institute of Health Carlos III (Spain). |

|                           |                                                                                                                                                                                                                     |
|---------------------------|---------------------------------------------------------------------------------------------------------------------------------------------------------------------------------------------------------------------|
| Spain, Balearic Islands   | Government of the Balearic Islands. Spain - Balearic Islands Ministry of Health and Consumption News About the Coronavirus COVID-19.                                                                                |
| Spain, Basque Country     | Basque Government Department of Health. Spain - Basque Country Information on the Evolution of the Coronavirus Epidemiological Bulletin.                                                                            |
| Spain, Canary Islands     | Government of the Canary Islands (Spain). Spain - Canary Islands Government COVID-19 Dashboard.                                                                                                                     |
| Spain, Cantabria          | Cantabrian Health Service (Spain), Government of Cantabria (Spain). Spain - Cantabria Epidemiological Situation of COVID-19. Spain: Cantabrian Health Service (Spain).                                              |
| Spain, Castile and León   | Castile and León Board, Health Commission (Spain). Spain - Castile and León Open Data: Coronavirus (COVID-19) Epidemiological Situation.                                                                            |
| Spain, Castile and León   | Castile and León Board, Health Commission (Spain). Spain - Castile and León Open Data: Situation of Hospitalized by Coronavirus.                                                                                    |
| Spain, Castilla–La Mancha | Ministry of Health, Consumption and Social Welfare (Spain). Spain Ministry of Health, Consumption, and Social Welfare COVID-19 Situation Update. Spain: Ministry of Health, Consumption and Social Welfare (Spain). |
| Spain, Castilla–La Mancha | Institute of Health Carlos III (Spain), Ministry of Health, Consumption and Social Welfare (Spain). Spain Carlos III Health Institute Situation of COVID-19. Madrid, Spain: Institute of Health Carlos III (Spain). |
| Spain, Catalonia          | Statistical Institute of Catalonia (IDESCAT) (Spain). Spain - Catalonia COVID-19 Weekly Confirmed Cases and Deaths. Barcelona, Spain: Statistical Institute of Catalonia (IDESCAT) (Spain).                         |
| Spain, Catalonia          | Statistical Institute of Catalonia (IDESCAT) (Spain). Spain - Catalonia COVID-19 Daily Confirmed Cases and Deaths 2020. Barcelona, Spain: Statistical Institute of Catalonia (IDESCAT) (Spain), 2020.               |
| Spain, Ceuta              | Ministry of Health, Consumption and Social Welfare (Spain). Spain Ministry of Health, Consumption, and Social Welfare                                                                                               |



|                            |                                                                                                                                                                                                                     |
|----------------------------|---------------------------------------------------------------------------------------------------------------------------------------------------------------------------------------------------------------------|
|                            | COVID-19 Situation Update. Spain: Ministry of Health, Consumption and Social Welfare (Spain).                                                                                                                       |
| Spain, Ceuta               | Institute of Health Carlos III (Spain), Ministry of Health, Consumption and Social Welfare (Spain). Spain Carlos III Health Institute Situation of COVID-19. Madrid, Spain: Institute of Health Carlos III (Spain). |
| Spain, Community of Madrid | Ministry of Health, Consumption and Social Welfare (Spain). Spain Ministry of Health, Consumption, and Social Welfare COVID-19 Situation Update. Spain: Ministry of Health, Consumption and Social Welfare (Spain). |
| Spain, Community of Madrid | City of Madrid (Spain), Madrid Health Service (Spain). Spain - Madrid Health Service COVID-19 Current Situation Daily Status Report. Madrid, Spain: City of Madrid (Spain).                                         |
| Spain, Extremadura         | Extremadura Health Service (SES) (Spain), Government of Extremadura (Spain). Spain - Extremadura Summary of Accumulated COVID-19 Epidemiological Data. Canal Extremadura.                                           |
| Spain, Galicia             | Galician Healthcare Service (Spain), Regional Government of Galicia (Spain). Spain - Galicia Regional Government COVID-19 Press Releases 2020. Spain: Regional Government of Galicia (Spain).                       |
| Spain, La Rioja            | Government of La Rioja (Spain). Spain - La Rioja Covid-19 Tests Performed per Days. Brazil: Government of La Rioja (Spain).                                                                                         |
| Spain, Melilla             | Ministry of Health, Consumption and Social Welfare (Spain). Spain Ministry of Health, Consumption, and Social Welfare COVID-19 Situation Update. Spain: Ministry of Health, Consumption and Social Welfare (Spain). |
| Spain, Melilla             | Institute of Health Carlos III (Spain), Ministry of Health, Consumption and Social Welfare (Spain). Spain Carlos III Health Institute Situation of COVID-19. Madrid, Spain: Institute of Health Carlos III (Spain). |
| Spain, Murcia              | Institute of Health Carlos III (Spain), Ministry of Health, Consumption and Social Welfare (Spain). Spain Carlos III Health Institute Situation of COVID-19. Madrid, Spain: Institute of Health Carlos III (Spain). |

|                            |                                                                                                                                                                                                  |
|----------------------------|--------------------------------------------------------------------------------------------------------------------------------------------------------------------------------------------------|
|                            |                                                                                                                                                                                                  |
| Spain, Murcia              | Ministry of Health of the Region of Murcia (Spain). COVID-19 Region of Murcia - Spain. Spain: Ministry of Health of the Region of Murcia (Spain).                                                |
| Spain, Navarre             | Government of Navarra (Spain). Spain - Navarra COVID-19 Testing, Deaths, Hospitalization Data May-June 2020. Spain: Government of Navarra (Spain), 2020.                                         |
| Spain, Valencian Community | Valencia Ministry of Universal Health and Public Health (Spain). Spain - Valencia COVID-19: Monitoring of the Situation. Spain: Valencia Ministry of Universal Health and Public Health (Spain). |
| Sri Lanka                  | Johns Hopkins University. 2019 Novel Coronavirus COVID-19 (2019-nCoV) Data Repository by Johns Hopkins CSSE. Baltimore, Maryland: Johns Hopkins University.                                      |
| Sudan                      | Johns Hopkins University. 2019 Novel Coronavirus COVID-19 (2019-nCoV) Data Repository by Johns Hopkins CSSE. Baltimore, Maryland: Johns Hopkins University.                                      |
| Suriname                   | Johns Hopkins University. 2019 Novel Coronavirus COVID-19 (2019-nCoV) Data Repository by Johns Hopkins CSSE. Baltimore, Maryland: Johns Hopkins University.                                      |
| Sweden                     | Public Health Agency of Sweden. Sweden Public Health Agency COVID-19 Confirmed Cases Daily Update. Östersund, Sweden: Public Health Agency of Sweden.                                            |
| Switzerland                | Federal Office of Public Health (Switzerland). Switzerland Federal Office of Public Health New Coronavirus Current Situation. Berne, Switzerland: Federal Office of Public Health (Switzerland). |
| Syria                      | Johns Hopkins University. 2019 Novel Coronavirus COVID-19 (2019-nCoV) Data Repository by Johns Hopkins CSSE. Baltimore, Maryland: Johns Hopkins University.                                      |
| Taiwan (province of China) | Johns Hopkins University. 2019 Novel Coronavirus COVID-19 (2019-nCoV) Data Repository by Johns Hopkins CSSE. Baltimore, Maryland: Johns Hopkins University.                                      |

|                     |                                                                                                                                                             |
|---------------------|-------------------------------------------------------------------------------------------------------------------------------------------------------------|
| Tajikistan          | Johns Hopkins University. 2019 Novel Coronavirus COVID-19 (2019-nCoV) Data Repository by Johns Hopkins CSSE. Baltimore, Maryland: Johns Hopkins University. |
| Tanzania            | Johns Hopkins University. 2019 Novel Coronavirus COVID-19 (2019-nCoV) Data Repository by Johns Hopkins CSSE. Baltimore, Maryland: Johns Hopkins University. |
| Thailand            | Johns Hopkins University. 2019 Novel Coronavirus COVID-19 (2019-nCoV) Data Repository by Johns Hopkins CSSE. Baltimore, Maryland: Johns Hopkins University. |
| The Bahamas         | Johns Hopkins University. 2019 Novel Coronavirus COVID-19 (2019-nCoV) Data Repository by Johns Hopkins CSSE. Baltimore, Maryland: Johns Hopkins University. |
| The Gambia          | Johns Hopkins University. 2019 Novel Coronavirus COVID-19 (2019-nCoV) Data Repository by Johns Hopkins CSSE. Baltimore, Maryland: Johns Hopkins University. |
| Timor-Leste         | Johns Hopkins University. 2019 Novel Coronavirus COVID-19 (2019-nCoV) Data Repository by Johns Hopkins CSSE. Baltimore, Maryland: Johns Hopkins University. |
| Togo                | Johns Hopkins University. 2019 Novel Coronavirus COVID-19 (2019-nCoV) Data Repository by Johns Hopkins CSSE. Baltimore, Maryland: Johns Hopkins University. |
| Trinidad and Tobago | Johns Hopkins University. 2019 Novel Coronavirus COVID-19 (2019-nCoV) Data Repository by Johns Hopkins CSSE. Baltimore, Maryland: Johns Hopkins University. |
| Tunisia             | Johns Hopkins University. 2019 Novel Coronavirus COVID-19 (2019-nCoV) Data Repository by Johns Hopkins CSSE. Baltimore, Maryland: Johns Hopkins University. |
| Turkey              | Johns Hopkins University. 2019 Novel Coronavirus COVID-19 (2019-nCoV) Data Repository by Johns Hopkins CSSE. Baltimore, Maryland: Johns Hopkins University. |
| Uganda              | Johns Hopkins University. 2019 Novel Coronavirus COVID-19 (2019-nCoV) Data Repository by Johns Hopkins CSSE. Baltimore, Maryland: Johns Hopkins University. |

|                      |                                                                                                                                                             |
|----------------------|-------------------------------------------------------------------------------------------------------------------------------------------------------------|
| UK, England          | Office for National Statistics (ONS) (United Kingdom).<br>United Kingdom - England and Wales Deaths Registered Weekly, Provisional.                         |
| UK, Northern Ireland | Office for National Statistics (ONS) (United Kingdom).<br>United Kingdom - England and Wales Deaths Registered Weekly, Provisional.                         |
| UK, Scotland         | Office for National Statistics (ONS) (United Kingdom).<br>United Kingdom - England and Wales Deaths Registered Weekly, Provisional.                         |
| UK, Wales            | Office for National Statistics (ONS) (United Kingdom).<br>United Kingdom - England and Wales Deaths Registered Weekly, Provisional.                         |
| Ukraine              | Johns Hopkins University. 2019 Novel Coronavirus COVID-19 (2019-nCoV) Data Repository by Johns Hopkins CSSE. Baltimore, Maryland: Johns Hopkins University. |
| United Arab Emirates | Johns Hopkins University. 2019 Novel Coronavirus COVID-19 (2019-nCoV) Data Repository by Johns Hopkins CSSE. Baltimore, Maryland: Johns Hopkins University. |
| Uruguay              | Johns Hopkins University. 2019 Novel Coronavirus COVID-19 (2019-nCoV) Data Repository by Johns Hopkins CSSE. Baltimore, Maryland: Johns Hopkins University. |
| USA, Alabama         | Johns Hopkins University. 2019 Novel Coronavirus COVID-19 (2019-nCoV) Data Repository by Johns Hopkins CSSE. Baltimore, Maryland: Johns Hopkins University. |
| USA, Alaska          | Johns Hopkins University. 2019 Novel Coronavirus COVID-19 (2019-nCoV) Data Repository by Johns Hopkins CSSE. Baltimore, Maryland: Johns Hopkins University. |
| USA, Arizona         | Johns Hopkins University. 2019 Novel Coronavirus COVID-19 (2019-nCoV) Data Repository by Johns Hopkins CSSE. Baltimore, Maryland: Johns Hopkins University. |
| USA, Arkansas        | Johns Hopkins University. 2019 Novel Coronavirus COVID-19 (2019-nCoV) Data Repository by Johns Hopkins CSSE. Baltimore, Maryland: Johns Hopkins University. |

|                  |                                                                                                                                                                                                                                     |
|------------------|-------------------------------------------------------------------------------------------------------------------------------------------------------------------------------------------------------------------------------------|
| USA, California  | Johns Hopkins University. 2019 Novel Coronavirus COVID-19 (2019-nCoV) Data Repository by Johns Hopkins CSSE. Baltimore, Maryland: Johns Hopkins University.                                                                         |
| USA, Colorado    | Johns Hopkins University. 2019 Novel Coronavirus COVID-19 (2019-nCoV) Data Repository by Johns Hopkins CSSE. Baltimore, Maryland: Johns Hopkins University.                                                                         |
| USA, Connecticut | Johns Hopkins University. 2019 Novel Coronavirus COVID-19 (2019-nCoV) Data Repository by Johns Hopkins CSSE. Baltimore, Maryland: Johns Hopkins University.                                                                         |
| USA, Delaware    | Delaware Division of Public Health (United States). United States - Delaware Division of Public Health Coronavirus Disease (COVID-19) Data Dashboard. United States of America: Delaware Division of Public Health (United States). |
| USA, Florida     | Johns Hopkins University. 2019 Novel Coronavirus COVID-19 (2019-nCoV) Data Repository by Johns Hopkins CSSE. Baltimore, Maryland: Johns Hopkins University.                                                                         |
| USA, Georgia     | Johns Hopkins University. 2019 Novel Coronavirus COVID-19 (2019-nCoV) Data Repository by Johns Hopkins CSSE. Baltimore, Maryland: Johns Hopkins University.                                                                         |
| USA, Hawaii      | Johns Hopkins University. 2019 Novel Coronavirus COVID-19 (2019-nCoV) Data Repository by Johns Hopkins CSSE. Baltimore, Maryland: Johns Hopkins University.                                                                         |
| USA, Idaho       | Johns Hopkins University. 2019 Novel Coronavirus COVID-19 (2019-nCoV) Data Repository by Johns Hopkins CSSE. Baltimore, Maryland: Johns Hopkins University.                                                                         |
| USA, Illinois    | Johns Hopkins University. 2019 Novel Coronavirus COVID-19 (2019-nCoV) Data Repository by Johns Hopkins CSSE. Baltimore, Maryland: Johns Hopkins University.                                                                         |
| USA, Indiana     | Johns Hopkins University. 2019 Novel Coronavirus COVID-19 (2019-nCoV) Data Repository by Johns Hopkins CSSE. Baltimore, Maryland: Johns Hopkins University.                                                                         |
| USA, Iowa        | Johns Hopkins University. 2019 Novel Coronavirus COVID-19 (2019-nCoV) Data Repository by Johns Hopkins CSSE. Baltimore, Maryland: Johns Hopkins University.                                                                         |

|                    |                                                                                                                                                             |
|--------------------|-------------------------------------------------------------------------------------------------------------------------------------------------------------|
|                    |                                                                                                                                                             |
| USA, Kansas        | Johns Hopkins University. 2019 Novel Coronavirus COVID-19 (2019-nCoV) Data Repository by Johns Hopkins CSSE. Baltimore, Maryland: Johns Hopkins University. |
| USA, Kentucky      | Johns Hopkins University. 2019 Novel Coronavirus COVID-19 (2019-nCoV) Data Repository by Johns Hopkins CSSE. Baltimore, Maryland: Johns Hopkins University. |
| USA, Louisiana     | Johns Hopkins University. 2019 Novel Coronavirus COVID-19 (2019-nCoV) Data Repository by Johns Hopkins CSSE. Baltimore, Maryland: Johns Hopkins University. |
| USA, Maine         | Johns Hopkins University. 2019 Novel Coronavirus COVID-19 (2019-nCoV) Data Repository by Johns Hopkins CSSE. Baltimore, Maryland: Johns Hopkins University. |
| USA, Maryland      | Johns Hopkins University. 2019 Novel Coronavirus COVID-19 (2019-nCoV) Data Repository by Johns Hopkins CSSE. Baltimore, Maryland: Johns Hopkins University. |
| USA, Massachusetts | Johns Hopkins University. 2019 Novel Coronavirus COVID-19 (2019-nCoV) Data Repository by Johns Hopkins CSSE. Baltimore, Maryland: Johns Hopkins University. |
| USA, Michigan      | Johns Hopkins University. 2019 Novel Coronavirus COVID-19 (2019-nCoV) Data Repository by Johns Hopkins CSSE. Baltimore, Maryland: Johns Hopkins University. |
| USA, Minnesota     | Johns Hopkins University. 2019 Novel Coronavirus COVID-19 (2019-nCoV) Data Repository by Johns Hopkins CSSE. Baltimore, Maryland: Johns Hopkins University. |
| USA, Mississippi   | Johns Hopkins University. 2019 Novel Coronavirus COVID-19 (2019-nCoV) Data Repository by Johns Hopkins CSSE. Baltimore, Maryland: Johns Hopkins University. |
| USA, Missouri      | Johns Hopkins University. 2019 Novel Coronavirus COVID-19 (2019-nCoV) Data Repository by Johns Hopkins CSSE. Baltimore, Maryland: Johns Hopkins University. |
| USA, Montana       | Johns Hopkins University. 2019 Novel Coronavirus COVID-19 (2019-nCoV) Data Repository by Johns Hopkins CSSE.                                                |

|                     |                                                                                                                                                                                                                                            |
|---------------------|--------------------------------------------------------------------------------------------------------------------------------------------------------------------------------------------------------------------------------------------|
|                     | Baltimore, Maryland: Johns Hopkins University.                                                                                                                                                                                             |
| USA, Nebraska       | Johns Hopkins University. 2019 Novel Coronavirus COVID-19 (2019-nCoV) Data Repository by Johns Hopkins CSSE. Baltimore, Maryland: Johns Hopkins University.                                                                                |
| USA, Nevada         | Johns Hopkins University. 2019 Novel Coronavirus COVID-19 (2019-nCoV) Data Repository by Johns Hopkins CSSE. Baltimore, Maryland: Johns Hopkins University.                                                                                |
| USA, New Hampshire  | Johns Hopkins University. 2019 Novel Coronavirus COVID-19 (2019-nCoV) Data Repository by Johns Hopkins CSSE. Baltimore, Maryland: Johns Hopkins University.                                                                                |
| USA, New Jersey     | Johns Hopkins University. 2019 Novel Coronavirus COVID-19 (2019-nCoV) Data Repository by Johns Hopkins CSSE. Baltimore, Maryland: Johns Hopkins University.                                                                                |
| USA, New Mexico     | Johns Hopkins University. 2019 Novel Coronavirus COVID-19 (2019-nCoV) Data Repository by Johns Hopkins CSSE. Baltimore, Maryland: Johns Hopkins University.                                                                                |
| USA, New York       | New York Times. COVID-19 Cumulative Deaths and Cases in the United States by County - New York Times. New York, United States of America: New York Times.                                                                                  |
| USA, New York       | New York City Department of Health and Mental Hygiene. United States - New York City Department of Health and Mental Hygiene COVID-19 Data. New York, NY, United States of America: New York City Department of Health and Mental Hygiene. |
| USA, New York       | Johns Hopkins University. 2019 Novel Coronavirus COVID-19 (2019-nCoV) Data Repository by Johns Hopkins CSSE. Baltimore, Maryland: Johns Hopkins University.                                                                                |
| USA, North Carolina | Johns Hopkins University. 2019 Novel Coronavirus COVID-19 (2019-nCoV) Data Repository by Johns Hopkins CSSE. Baltimore, Maryland: Johns Hopkins University.                                                                                |
| USA, North Dakota   | Johns Hopkins University. 2019 Novel Coronavirus COVID-19 (2019-nCoV) Data Repository by Johns Hopkins CSSE. Baltimore, Maryland: Johns Hopkins University.                                                                                |

|                     |                                                                                                                                                                         |
|---------------------|-------------------------------------------------------------------------------------------------------------------------------------------------------------------------|
| USA, Ohio           | Ohio Department of Health. United States - Ohio Department of Health Coronavirus (COVID-19) Updates. Columbus, OH, United States of America: Ohio Department of Health. |
| USA, Oklahoma       | Johns Hopkins University. 2019 Novel Coronavirus COVID-19 (2019-nCoV) Data Repository by Johns Hopkins CSSE. Baltimore, Maryland: Johns Hopkins University.             |
| USA, Oregon         | Johns Hopkins University. 2019 Novel Coronavirus COVID-19 (2019-nCoV) Data Repository by Johns Hopkins CSSE. Baltimore, Maryland: Johns Hopkins University.             |
| USA, Pennsylvania   | Johns Hopkins University. 2019 Novel Coronavirus COVID-19 (2019-nCoV) Data Repository by Johns Hopkins CSSE. Baltimore, Maryland: Johns Hopkins University.             |
| USA, Rhode Island   | Johns Hopkins University. 2019 Novel Coronavirus COVID-19 (2019-nCoV) Data Repository by Johns Hopkins CSSE. Baltimore, Maryland: Johns Hopkins University.             |
| USA, South Carolina | Johns Hopkins University. 2019 Novel Coronavirus COVID-19 (2019-nCoV) Data Repository by Johns Hopkins CSSE. Baltimore, Maryland: Johns Hopkins University.             |
| USA, South Dakota   | Johns Hopkins University. 2019 Novel Coronavirus COVID-19 (2019-nCoV) Data Repository by Johns Hopkins CSSE. Baltimore, Maryland: Johns Hopkins University.             |
| USA, Tennessee      | Johns Hopkins University. 2019 Novel Coronavirus COVID-19 (2019-nCoV) Data Repository by Johns Hopkins CSSE. Baltimore, Maryland: Johns Hopkins University.             |
| USA, Texas          | Johns Hopkins University. 2019 Novel Coronavirus COVID-19 (2019-nCoV) Data Repository by Johns Hopkins CSSE. Baltimore, Maryland: Johns Hopkins University.             |
| USA, Utah           | Johns Hopkins University. 2019 Novel Coronavirus COVID-19 (2019-nCoV) Data Repository by Johns Hopkins CSSE. Baltimore, Maryland: Johns Hopkins University.             |
| USA, Vermont        | Johns Hopkins University. 2019 Novel Coronavirus COVID-19 (2019-nCoV) Data Repository by Johns Hopkins CSSE. Baltimore, Maryland: Johns Hopkins University.             |



|                     |                                                                                                                                                             |
|---------------------|-------------------------------------------------------------------------------------------------------------------------------------------------------------|
| USA, Virginia       | Johns Hopkins University. 2019 Novel Coronavirus COVID-19 (2019-nCoV) Data Repository by Johns Hopkins CSSE. Baltimore, Maryland: Johns Hopkins University. |
| USA, Washington     | New York Times. COVID-19 Cumulative Deaths and Cases in the United States by County - New York Times. New York, United States of America: New York Times.   |
| USA, Washington, DC | Johns Hopkins University. 2019 Novel Coronavirus COVID-19 (2019-nCoV) Data Repository by Johns Hopkins CSSE. Baltimore, Maryland: Johns Hopkins University. |
| USA, West Virginia  | Johns Hopkins University. 2019 Novel Coronavirus COVID-19 (2019-nCoV) Data Repository by Johns Hopkins CSSE. Baltimore, Maryland: Johns Hopkins University. |
| USA, Wisconsin      | Johns Hopkins University. 2019 Novel Coronavirus COVID-19 (2019-nCoV) Data Repository by Johns Hopkins CSSE. Baltimore, Maryland: Johns Hopkins University. |
| USA, Wyoming        | Johns Hopkins University. 2019 Novel Coronavirus COVID-19 (2019-nCoV) Data Repository by Johns Hopkins CSSE. Baltimore, Maryland: Johns Hopkins University. |
| Uzbekistan          | Johns Hopkins University. 2019 Novel Coronavirus COVID-19 (2019-nCoV) Data Repository by Johns Hopkins CSSE. Baltimore, Maryland: Johns Hopkins University. |
| Vanuatu             | Johns Hopkins University. 2019 Novel Coronavirus COVID-19 (2019-nCoV) Data Repository by Johns Hopkins CSSE. Baltimore, Maryland: Johns Hopkins University. |
| Venezuela           | Johns Hopkins University. 2019 Novel Coronavirus COVID-19 (2019-nCoV) Data Repository by Johns Hopkins CSSE. Baltimore, Maryland: Johns Hopkins University. |
| Vietnam             | Johns Hopkins University. 2019 Novel Coronavirus COVID-19 (2019-nCoV) Data Repository by Johns Hopkins CSSE. Baltimore, Maryland: Johns Hopkins University. |
| Virgin Islands      | Johns Hopkins University. 2019 Novel Coronavirus COVID-19 (2019-nCoV) Data Repository by Johns Hopkins CSSE. Baltimore, Maryland: Johns Hopkins University. |

|          |                                                                                                                                                             |
|----------|-------------------------------------------------------------------------------------------------------------------------------------------------------------|
| Yemen    | Johns Hopkins University. 2019 Novel Coronavirus COVID-19 (2019-nCoV) Data Repository by Johns Hopkins CSSE. Baltimore, Maryland: Johns Hopkins University. |
| Zambia   | Johns Hopkins University. 2019 Novel Coronavirus COVID-19 (2019-nCoV) Data Repository by Johns Hopkins CSSE. Baltimore, Maryland: Johns Hopkins University. |
| Zimbabwe | Johns Hopkins University. 2019 Novel Coronavirus COVID-19 (2019-nCoV) Data Repository by Johns Hopkins CSSE. Baltimore, Maryland: Johns Hopkins University. |

## Section 2: Age-stratified death sources

Figure S2. Age-stratified death data coverage by location

### Deaths Age Stratified

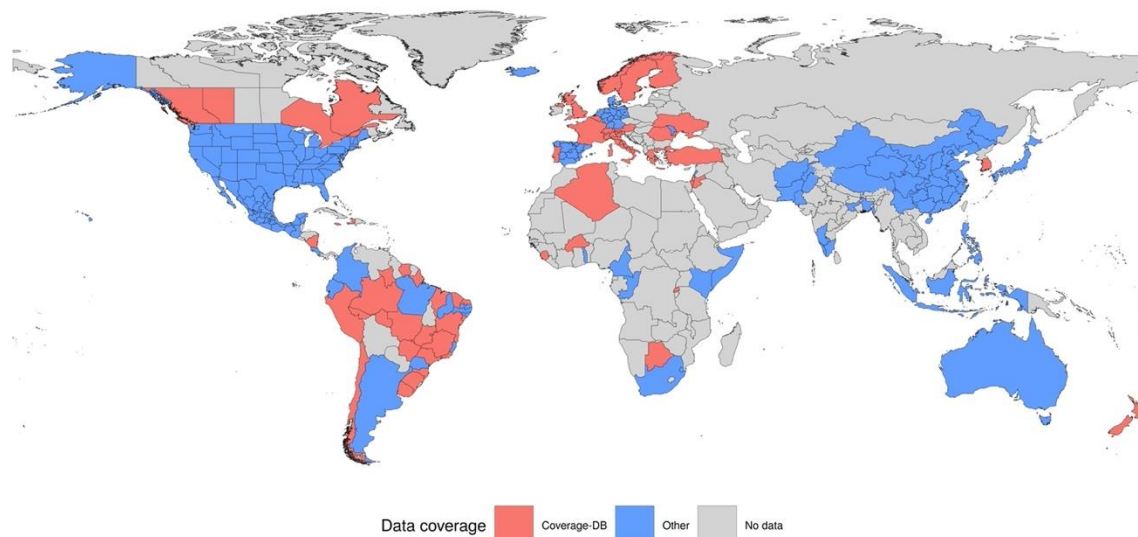

Table S2. Age-stratified death data sources by location

| Location     | Source                                                                                                                                                                              |
|--------------|-------------------------------------------------------------------------------------------------------------------------------------------------------------------------------------|
| Afghanistan  | Ministry of Public Health (Afghanistan). Afghanistan COVID-19 Epidemic Monitoring Dashboard. Kabul, Afghanistan: Ministry of Public Health (Afghanistan).                           |
| Algeria      | Max Planck Institute for Demographic Research. COVerAGE-DB: A database of COVID-19 cases and deaths by age. United States of America: OSF, Center for Open Science (United States). |
| Argentina    | Ministry of Health (Argentina). Argentina Ministry of Health COVID-19 Cases. Buenos Aires, Argentina: Ministry of Health (Argentina).                                               |
| Australia    | Coronavirus (COVID-19) in Australia. Coronavirus (COVID-19) in Australia - Fairfacts Data. Australia: Coronavirus (COVID-19) in Australia.                                          |
| Australia    | Department of Health (Australia). Australia Notifications of COVID-19 by Age Group and Sex . Canberra, Australia: Department of Health (Australia).                                 |
| Austria      | Max Planck Institute for Demographic Research. COVerAGE-DB: A database of COVID-19 cases and deaths by age. United States of America: OSF, Center for Open Science (United States). |
| Bangladesh   | Ministry of Health and Family Welfare (Bangladesh). Bangladesh COVID-19 Status Dashboard.                                                                                           |
| Belgium      | Max Planck Institute for Demographic Research. COVerAGE-DB: A database of COVID-19 cases and deaths by age. United States of America: OSF, Center for Open Science (United States). |
| Botswana     | Max Planck Institute for Demographic Research. COVerAGE-DB: A database of COVID-19 cases and deaths by age. United States of America: OSF, Center for Open Science (United States). |
| Brazil       | Max Planck Institute for Demographic Research. COVerAGE-DB: A database of COVID-19 cases and deaths by age. United States of America: OSF, Center for Open Science (United States). |
| Brazil, Acre | Max Planck Institute for Demographic Research. COVerAGE-DB: A database of COVID-19 cases and deaths by age. United States of America: OSF, Center for Open Science (United States). |

|                             |                                                                                                                                                                                              |
|-----------------------------|----------------------------------------------------------------------------------------------------------------------------------------------------------------------------------------------|
| Brazil, Alagoas             | Government of the State of Alagoas (Brazil). Brazil - Alagoas Technical Group for Emergency Monitoring COVID-19 Epidemiological Report. Brazil: Government of the State of Alagoas (Brazil). |
| Brazil, Amapá               | Max Planck Institute for Demographic Research. COVerAGE-DB: A database of COVID-19 cases and deaths by age. United States of America: OSF, Center for Open Science (United States).          |
| Brazil, Amazonas            | Max Planck Institute for Demographic Research. COVerAGE-DB: A database of COVID-19 cases and deaths by age. United States of America: OSF, Center for Open Science (United States).          |
| Brazil, Bahia               | Max Planck Institute for Demographic Research. COVerAGE-DB: A database of COVID-19 cases and deaths by age. United States of America: OSF, Center for Open Science (United States).          |
| Brazil, Ceará               | Max Planck Institute for Demographic Research. COVerAGE-DB: A database of COVID-19 cases and deaths by age. United States of America: OSF, Center for Open Science (United States).          |
| Brazil, Distrito Federal    | Max Planck Institute for Demographic Research. COVerAGE-DB: A database of COVID-19 cases and deaths by age. United States of America: OSF, Center for Open Science (United States).          |
| Brazil, Espírito Santo      | Government of Espírito Santo (Brazil). Brazil - Espírito Santo COVID-19 Panel.                                                                                                               |
| Brazil, Goiás               | Max Planck Institute for Demographic Research. COVerAGE-DB: A database of COVID-19 cases and deaths by age. United States of America: OSF, Center for Open Science (United States).          |
| Brazil, Maranhão            | Max Planck Institute for Demographic Research. COVerAGE-DB: A database of COVID-19 cases and deaths by age. United States of America: OSF, Center for Open Science (United States).          |
| Brazil, Mato Grosso         | Max Planck Institute for Demographic Research. COVerAGE-DB: A database of COVID-19 cases and deaths by age. United States of America: OSF, Center for Open Science (United States).          |
| Brazil, Mato Grosso do Sul  | Max Planck Institute for Demographic Research. COVerAGE-DB: A database of COVID-19 cases and deaths by age. United States of America: OSF, Center for Open Science (United States).          |
| Brazil, Minas Gerais        | Max Planck Institute for Demographic Research. COVerAGE-DB: A database of COVID-19 cases and deaths by age. United States of America: OSF, Center for Open Science (United States).          |
| Brazil, Pará                | Government of Pará (Brazil). Brazil - Pará, State of Coronavirus. Brazil: Government of Pará (Brazil).                                                                                       |
| Brazil, Paraíba             | Government of the State of Paraíba. Brazil - Paraíba COVID-19 Epidemiological Data.                                                                                                          |
| Brazil, Paraná              | Government of Paraná (Brazil), Secretary of Health (Parana). Brazil - Paraná COVID-19 Epidemiological Data. Curitiba, Brazil: Secretary of Health (Parana), 2020.                            |
| Brazil, Pernambuco          | State Department of Health Pernambuco (Brazil). COVID-19 in the World, in Brazil and in Pernambuco.                                                                                          |
| Brazil, Piauí               | Piauí State Government. Brazil - Piauí COVID-19 Epidemiological Dashboard. Teresina, Brazil: Piauí State Government.                                                                         |
| Brazil, Rio de Janeiro      | Max Planck Institute for Demographic Research. COVerAGE-DB: A database of COVID-19 cases and deaths by age. United States of America: OSF, Center for Open Science (United States).          |
| Brazil, Rio Grande do Norte | Max Planck Institute for Demographic Research. COVerAGE-DB: A database of COVID-19 cases and deaths by age. United States of America: OSF, Center for Open Science (United States).          |
| Brazil, Rio Grande do Sul   | Max Planck Institute for Demographic Research. COVerAGE-DB: A database of COVID-19 cases and deaths by age. United States of America: OSF, Center for Open Science (United States).          |

|                          |                                                                                                                                                                                                                                                                                      |
|--------------------------|--------------------------------------------------------------------------------------------------------------------------------------------------------------------------------------------------------------------------------------------------------------------------------------|
| Brazil, Rondônia         | Max Planck Institute for Demographic Research. COVerAGE-DB: A database of COVID-19 cases and deaths by age. United States of America: OSF, Center for Open Science (United States).                                                                                                  |
| Brazil, Roraima          | Max Planck Institute for Demographic Research. COVerAGE-DB: A database of COVID-19 cases and deaths by age. United States of America: OSF, Center for Open Science (United States).                                                                                                  |
| Brazil, Santa Catarina   | Max Planck Institute for Demographic Research. COVerAGE-DB: A database of COVID-19 cases and deaths by age. United States of America: OSF, Center for Open Science (United States).                                                                                                  |
| Brazil, São Paulo        | Max Planck Institute for Demographic Research. COVerAGE-DB: A database of COVID-19 cases and deaths by age. United States of America: OSF, Center for Open Science (United States).                                                                                                  |
| Brazil, Sergipe          | Max Planck Institute for Demographic Research. COVerAGE-DB: A database of COVID-19 cases and deaths by age. United States of America: OSF, Center for Open Science (United States).                                                                                                  |
| Burkina Faso             | Max Planck Institute for Demographic Research. COVerAGE-DB: A database of COVID-19 cases and deaths by age. United States of America: OSF, Center for Open Science (United States).                                                                                                  |
| Cameroon                 | Ministry of Public Health (Cameroon). Cameroon COVID-19 Press Briefing. Yaoundé, Cameroon: Ministry of Public Health (Cameroon).                                                                                                                                                     |
| Canada                   | Government of Canada. Canada Coronavirus Disease 2019 (COVID-19) Daily Epidemiology Update. Ottawa, Canada: Government of Canada.                                                                                                                                                    |
| Canada, Alberta          | Max Planck Institute for Demographic Research. COVerAGE-DB: A database of COVID-19 cases and deaths by age. United States of America: OSF, Center for Open Science (United States).                                                                                                  |
| Canada, British Columbia | Max Planck Institute for Demographic Research. COVerAGE-DB: A database of COVID-19 cases and deaths by age. United States of America: OSF, Center for Open Science (United States).                                                                                                  |
| Canada, Ontario          | Max Planck Institute for Demographic Research. COVerAGE-DB: A database of COVID-19 cases and deaths by age. United States of America: OSF, Center for Open Science (United States).                                                                                                  |
| Canada, Quebec           | Max Planck Institute for Demographic Research. COVerAGE-DB: A database of COVID-19 cases and deaths by age. United States of America: OSF, Center for Open Science (United States).                                                                                                  |
| Chile                    | Max Planck Institute for Demographic Research. COVerAGE-DB: A database of COVID-19 cases and deaths by age. United States of America: OSF, Center for Open Science (United States).                                                                                                  |
| China                    | The Novel Coronavirus Pneumonia Emergency Response Epidemiology Team. The Epidemiological Characteristics of an Outbreak of 2019 Novel Coronavirus Diseases (COVID-19) — China, 2020[J]. China CDC Weekly, 2020, 2(8): 113-122.                                                      |
| Colombia                 | National Institute of Health (Colombia). Colombia COVID-19 Cases Bulletin. Colombia: National Institute of Health (Colombia).                                                                                                                                                        |
| Congo (Brazzaville)      | Ministry of Health, Population, Promotion (Congo). Congo COVID-19 Epidemiological Situation. Congo: Ministry of Health and Population (Congo).                                                                                                                                       |
| Costa Rica               | Distance State University (UNED) (Costa Rica), Ministry of Health (Costa Rica). Costa Rica COVID-19 National Situation - Distance State University. San Jose, Costa Rica: Distance State University (UNED) (Costa Rica).                                                             |
| Denmark                  | State Serum Institute (Denmark). Denmark State Serum Institute Monitoring of COVID-19. Denmark: State Serum Institute (Denmark).                                                                                                                                                     |
| Ecuador                  | Ministry of Public Health (Ecuador). Ecuador Coronavirus Covid-19 Epidemiological Bulletins 2020. Quito, Ecuador: Ministry of Public Health (Ecuador), 2020.                                                                                                                         |
| Eswatini                 | Botswana International University of Science And Technology, DataConvergence, Ministry of Health (Eswatini), National Research Foundation (South Africa), University of Eswatini, University of Witwatersrand. Eswatini COVID-19 Dashboard. Eswatini: Ministry of Health (Eswatini). |

|                               |                                                                                                                                                                                                                                                        |
|-------------------------------|--------------------------------------------------------------------------------------------------------------------------------------------------------------------------------------------------------------------------------------------------------|
| Finland                       | Max Planck Institute for Demographic Research. COVerAGE-DB: A database of COVID-19 cases and deaths by age. United States of America: OSF, Center for Open Science (United States).                                                                    |
| France                        | Max Planck Institute for Demographic Research. COVerAGE-DB: A database of COVID-19 cases and deaths by age. United States of America: OSF, Center for Open Science (United States).                                                                    |
| Germany                       | Robert Koch Institute. Coronavirus Disease 2019 (COVID-19) Daily Situation Report - Robert Koch Institute. Berlin, Germany: Robert Koch Institute.                                                                                                     |
| Greece                        | Max Planck Institute for Demographic Research. COVerAGE-DB: A database of COVID-19 cases and deaths by age. United States of America: OSF, Center for Open Science (United States).                                                                    |
| Guatemala                     | Guatemala Ministry of Health and Social Assistance. Guatemala Daily Report Of COVID-19 Cases. Menlo Park, United States of America: Facebook.                                                                                                          |
| Guatemala                     | Ministry of Public Health and Social Assistance (Guatemala). Guatemala COVID-19 Situation Deaths. Guatemala City, Guatemala: Ministry of Public Health and Social Assistance (Guatemala).                                                              |
| Haiti                         | Max Planck Institute for Demographic Research. COVerAGE-DB: A database of COVID-19 cases and deaths by age. United States of America: OSF, Center for Open Science (United States).                                                                    |
| Iceland                       | Directorate of Health (Iceland). Iceland COVID-19 Statistics 2020. Reykjavík, Iceland: Directorate of Health (Iceland), 2020.                                                                                                                          |
| India                         | Max Planck Institute for Demographic Research. COVerAGE-DB: A database of COVID-19 cases and deaths by age. United States of America: OSF, Center for Open Science (United States).                                                                    |
| India, Delhi                  | Public Health Foundation of India. India Disease Burden Initiative Covid Data by Age, Sex, and State, March 9-May 27, 2020.                                                                                                                            |
| India, Jharkhand              | Bureau of Outreach and Communication, Regional Outreach Bureau (Jharkhand). India - Jharkhand Regional Outreach Bureau Twitter Communications and COVID-19 Updates. India: Bureau of Outreach and Communication, Regional Outreach Bureau (Jharkhand). |
| India, Karnataka              | Public Health Foundation of India. India Disease Burden Initiative Covid Data by Age, Sex, and State, March 9-July 5, 2020.                                                                                                                            |
| India, Kerala                 | Government of Kerala. India - Kerala COVID-19 Dashboard.                                                                                                                                                                                               |
| India, Tamil Nadu             | Health and Family Welfare Department, Government of Tamil Nadu. India - Tamil Nadu (COVID-19) Daily Media Bulletin. Chennai, India: Health and Family Welfare Department, Government of Tamil Nadu.                                                    |
| Indonesia                     | Government of Indonesia. Indonesia Situation of the COVID-19 Virus Live Data Impressions.                                                                                                                                                              |
| Indonesia, Aceh               | Government of Indonesia. Indonesia Situation of the COVID-19 Virus Live Data Impressions.                                                                                                                                                              |
| Indonesia, Bali               | Government of Indonesia. Indonesia Situation of the COVID-19 Virus Live Data Impressions.                                                                                                                                                              |
| Indonesia, Banten             | Government of Indonesia. Indonesia Situation of the COVID-19 Virus Live Data Impressions.                                                                                                                                                              |
| Indonesia, Bengkulu           | Government of Indonesia. Indonesia Situation of the COVID-19 Virus Live Data Impressions.                                                                                                                                                              |
| Indonesia, Central Java       | Government of Indonesia. Indonesia Situation of the COVID-19 Virus Live Data Impressions.                                                                                                                                                              |
| Indonesia, Central Kalimantan | Government of Indonesia. Indonesia Situation of the COVID-19 Virus Live Data Impressions.                                                                                                                                                              |
| Indonesia, East Java          | Government of Indonesia. Indonesia Situation of the COVID-19 Virus Live Data Impressions.                                                                                                                                                              |
| Indonesia, East Kalimantan    | Government of Indonesia. Indonesia Situation of the COVID-19 Virus Live Data Impressions.                                                                                                                                                              |

|                               |                                                                                                                                                                                     |
|-------------------------------|-------------------------------------------------------------------------------------------------------------------------------------------------------------------------------------|
| Indonesia, Gorontalo          | Government of Indonesia. Indonesia Situation of the COVID-19 Virus Live Data Impressions.                                                                                           |
| Indonesia, Jakarta            | Government of Indonesia. Indonesia Situation of the COVID-19 Virus Live Data Impressions.                                                                                           |
| Indonesia, Lampung            | Government of Indonesia. Indonesia Situation of the COVID-19 Virus Live Data Impressions.                                                                                           |
| Indonesia, Maluku             | Government of Indonesia. Indonesia Situation of the COVID-19 Virus Live Data Impressions.                                                                                           |
| Indonesia, North Maluku       | Government of Indonesia. Indonesia Situation of the COVID-19 Virus Live Data Impressions.                                                                                           |
| Indonesia, North Sulawesi     | Government of Indonesia. Indonesia Situation of the COVID-19 Virus Live Data Impressions.                                                                                           |
| Indonesia, North Sumatra      | Government of Indonesia. Indonesia Situation of the COVID-19 Virus Live Data Impressions.                                                                                           |
| Indonesia, Papua              | Government of Indonesia. Indonesia Situation of the COVID-19 Virus Live Data Impressions.                                                                                           |
| Indonesia, Riau               | Government of Indonesia. Indonesia Situation of the COVID-19 Virus Live Data Impressions.                                                                                           |
| Indonesia, Riau Islands       | Government of Indonesia. Indonesia Situation of the COVID-19 Virus Live Data Impressions.                                                                                           |
| Indonesia, South Kalimantan   | Government of Indonesia. Indonesia Situation of the COVID-19 Virus Live Data Impressions.                                                                                           |
| Indonesia, South Sulawesi     | Government of Indonesia. Indonesia Situation of the COVID-19 Virus Live Data Impressions.                                                                                           |
| Indonesia, South Sumatra      | Government of Indonesia. Indonesia Situation of the COVID-19 Virus Live Data Impressions.                                                                                           |
| Indonesia, Southeast Sulawesi | Government of Indonesia. Indonesia Situation of the COVID-19 Virus Live Data Impressions.                                                                                           |
| Indonesia, West Java          | Government of Indonesia. Indonesia Situation of the COVID-19 Virus Live Data Impressions.                                                                                           |
| Indonesia, West Nusa Tenggara | Government of Indonesia. Indonesia Situation of the COVID-19 Virus Live Data Impressions.                                                                                           |
| Indonesia, West Papua         | Government of Indonesia. Indonesia Situation of the COVID-19 Virus Live Data Impressions.                                                                                           |
| Indonesia, West Sumatra       | Government of Indonesia. Indonesia Situation of the COVID-19 Virus Live Data Impressions.                                                                                           |
| Indonesia, Yogyakarta         | Government of Indonesia. Indonesia Situation of the COVID-19 Virus Live Data Impressions.                                                                                           |
| Israel                        | Max Planck Institute for Demographic Research. COVerAGE-DB: A database of COVID-19 cases and deaths by age. United States of America: OSF, Center for Open Science (United States). |
| Italy                         | Max Planck Institute for Demographic Research. COVerAGE-DB: A database of COVID-19 cases and deaths by age. United States of America: OSF, Center for Open Science (United States). |
| Jamaica                       | Max Planck Institute for Demographic Research. COVerAGE-DB: A database of COVID-19 cases and deaths by age. United States of America: OSF, Center for Open Science (United States). |
| Japan                         | Ministry of Health, Labour and Welfare (Japan). Japan Coronavirus Disease (COVID-19) Situation Report.                                                                              |
| Jordan                        | Max Planck Institute for Demographic Research. COVerAGE-DB: A database of COVID-19 cases and deaths by age. United States of America: OSF, Center for Open Science (United States). |
| Kenya                         | Ministry of Health (Kenya). Kenya COVID-19 Situation Reports 2020. Nairobi, Kenya: Ministry of Health (Kenya), 2020.                                                                |

|                             |                                                                                                                                                                |
|-----------------------------|----------------------------------------------------------------------------------------------------------------------------------------------------------------|
| Lebanon                     | Ministry of Public Health (Lebanon). Lebanon Ministry of Public Health Monitoring of COVID-19 Infection. Beirut, Lebanon: Ministry of Public Health (Lebanon). |
| Lebanon                     | Ministry of Public Health (Lebanon). Lebanon COVID-19 Dashboard. Beirut, Lebanon: Ministry of Public Health (Lebanon).                                         |
| Mexico                      | Directorate General of Epidemiology, Secretariat of Health (Mexico). Mexico Epidemiological Report on the Situation of COVID-19.                               |
| Mexico, Aguascalientes      | Directorate General of Epidemiology, Secretariat of Health (Mexico). Mexico Epidemiological Report on the Situation of COVID-19.                               |
| Mexico, Baja California     | Directorate General of Epidemiology, Secretariat of Health (Mexico). Mexico Epidemiological Report on the Situation of COVID-19.                               |
| Mexico, Baja California Sur | Directorate General of Epidemiology, Secretariat of Health (Mexico). Mexico Epidemiological Report on the Situation of COVID-19.                               |
| Mexico, Campeche            | Directorate General of Epidemiology, Secretariat of Health (Mexico). Mexico Epidemiological Report on the Situation of COVID-19.                               |
| Mexico, Chiapas             | Directorate General of Epidemiology, Secretariat of Health (Mexico). Mexico Epidemiological Report on the Situation of COVID-19.                               |
| Mexico, Chihuahua           | Directorate General of Epidemiology, Secretariat of Health (Mexico). Mexico Epidemiological Report on the Situation of COVID-19.                               |
| Mexico, Coahuila            | Directorate General of Epidemiology, Secretariat of Health (Mexico). Mexico Epidemiological Report on the Situation of COVID-19.                               |
| Mexico, Colima              | Directorate General of Epidemiology, Secretariat of Health (Mexico). Mexico Epidemiological Report on the Situation of COVID-19.                               |
| Mexico, Durango             | Directorate General of Epidemiology, Secretariat of Health (Mexico). Mexico Epidemiological Report on the Situation of COVID-19.                               |
| Mexico, Guanajuato          | Directorate General of Epidemiology, Secretariat of Health (Mexico). Mexico Epidemiological Report on the Situation of COVID-19.                               |
| Mexico, Guerrero            | Directorate General of Epidemiology, Secretariat of Health (Mexico). Mexico Epidemiological Report on the Situation of COVID-19.                               |
| Mexico, Hidalgo             | Directorate General of Epidemiology, Secretariat of Health (Mexico). Mexico Epidemiological Report on the Situation of COVID-19.                               |
| Mexico, Jalisco             | Directorate General of Epidemiology, Secretariat of Health (Mexico). Mexico Epidemiological Report on the Situation of COVID-19.                               |
| Mexico, México              | Directorate General of Epidemiology, Secretariat of Health (Mexico). Mexico Epidemiological Report on the Situation of COVID-19.                               |
| Mexico, Mexico City         | Directorate General of Epidemiology, Secretariat of Health (Mexico). Mexico Epidemiological Report on the Situation of COVID-19.                               |
| Mexico, Michoacán de Ocampo | Directorate General of Epidemiology, Secretariat of Health (Mexico). Mexico Epidemiological Report on the Situation of COVID-19.                               |
| Mexico, Morelos             | Directorate General of Epidemiology, Secretariat of Health (Mexico). Mexico Epidemiological Report on the Situation of COVID-19.                               |
| Mexico, Nayarit             | Directorate General of Epidemiology, Secretariat of Health (Mexico). Mexico Epidemiological Report on the Situation of COVID-19.                               |
| Mexico, Nuevo León          | Directorate General of Epidemiology, Secretariat of Health (Mexico). Mexico Epidemiological Report on the Situation of COVID-19.                               |
| Mexico, Oaxaca              | Directorate General of Epidemiology, Secretariat of Health (Mexico). Mexico Epidemiological Report on the Situation of COVID-19.                               |
| Mexico, Puebla              | Directorate General of Epidemiology, Secretariat of Health (Mexico). Mexico Epidemiological Report on the Situation of COVID-19.                               |
| Mexico, Querétaro           | Directorate General of Epidemiology, Secretariat of Health (Mexico). Mexico Epidemiological Report on the Situation of COVID-19.                               |
| Mexico, Quintana Roo        | Directorate General of Epidemiology, Secretariat of Health (Mexico). Mexico Epidemiological Report on the Situation of COVID-19.                               |
| Mexico, San Luis Potosí     | Directorate General of Epidemiology, Secretariat of Health (Mexico). Mexico Epidemiological Report on the Situation of COVID-19.                               |



|                                         |                                                                                                                                                                                                                            |
|-----------------------------------------|----------------------------------------------------------------------------------------------------------------------------------------------------------------------------------------------------------------------------|
| Mexico, Sinaloa                         | Directorate General of Epidemiology, Secretariat of Health (Mexico). Mexico Epidemiological Report on the Situation of COVID-19.                                                                                           |
| Mexico, Sonora                          | Directorate General of Epidemiology, Secretariat of Health (Mexico). Mexico Epidemiological Report on the Situation of COVID-19.                                                                                           |
| Mexico, Tabasco                         | Directorate General of Epidemiology, Secretariat of Health (Mexico). Mexico Epidemiological Report on the Situation of COVID-19.                                                                                           |
| Mexico, Tamaulipas                      | Directorate General of Epidemiology, Secretariat of Health (Mexico). Mexico Epidemiological Report on the Situation of COVID-19.                                                                                           |
| Mexico, Tlaxcala                        | Directorate General of Epidemiology, Secretariat of Health (Mexico). Mexico Epidemiological Report on the Situation of COVID-19.                                                                                           |
| Mexico, Veracruz de Ignacio de la Llave | Directorate General of Epidemiology, Secretariat of Health (Mexico). Mexico Epidemiological Report on the Situation of COVID-19.                                                                                           |
| Mexico, Yucatán                         | Directorate General of Epidemiology, Secretariat of Health (Mexico). Mexico Epidemiological Report on the Situation of COVID-19.                                                                                           |
| Mexico, Zacatecas                       | Directorate General of Epidemiology, Secretariat of Health (Mexico). Mexico Epidemiological Report on the Situation of COVID-19.                                                                                           |
| Moldova                                 | Ministry of Health, Labor and Social Protection of the Republic of Moldova. Republic of Moldova COVID-19 Dashboard. Ministry of Health, Labor and Social Protection of the Republic of Moldova.                            |
| Netherlands                             | National Institute for Public Health and the Environment (Netherlands). Netherlands Epidemiological Situation of COVID-19. Bilthoven, Netherlands: National Institute for Public Health and the Environment (Netherlands). |
| New Zealand                             | Max Planck Institute for Demographic Research. COVERAGE-DB: A database of COVID-19 cases and deaths by age. United States of America: OSF, Center for Open Science (United States).                                        |
| Nicaragua                               | Max Planck Institute for Demographic Research. COVERAGE-DB: A database of COVID-19 cases and deaths by age. United States of America: OSF, Center for Open Science (United States).                                        |
| Norway                                  | Max Planck Institute for Demographic Research. COVERAGE-DB: A database of COVID-19 cases and deaths by age. United States of America: OSF, Center for Open Science (United States).                                        |
| Pakistan                                | Ministry of National Health Services, Regulations & Coordination (Pakistan). Pakistan COVID-19 Dashboard.                                                                                                                  |
| Peru                                    | Max Planck Institute for Demographic Research. COVERAGE-DB: A database of COVID-19 cases and deaths by age. United States of America: OSF, Center for Open Science (United States).                                        |
| Philippines                             | Department of Health (Philippines). Philippines Department of Health COVID-19 Tracker. Manila, Philippines: Department of Health (Philippines).                                                                            |
| Portugal                                | Max Planck Institute for Demographic Research. COVERAGE-DB: A database of COVID-19 cases and deaths by age. United States of America: OSF, Center for Open Science (United States).                                        |
| Romania                                 | Max Planck Institute for Demographic Research. COVERAGE-DB: A database of COVID-19 cases and deaths by age. United States of America: OSF, Center for Open Science (United States).                                        |
| Rwanda                                  | Max Planck Institute for Demographic Research. COVERAGE-DB: A database of COVID-19 cases and deaths by age. United States of America: OSF, Center for Open Science (United States).                                        |
| Sierra Leone                            | Max Planck Institute for Demographic Research. COVERAGE-DB: A database of COVID-19 cases and deaths by age. United States of America: OSF, Center for Open Science (United States).                                        |
| Singapore                               | Ministry of Health (Singapore). Singapore COVID-19 Tracker - Visualizing COVID-19/Coronavirus Cases and Cluster Zones 2020.                                                                                                |

|                            |                                                                                                                                                                                                                                         |
|----------------------------|-----------------------------------------------------------------------------------------------------------------------------------------------------------------------------------------------------------------------------------------|
| Somalia                    | Humanitarian Response, United Nations Office for the Coordination of Humanitarian Affairs (OCHA), World Health Organization (WHO). Somalia COVID-19 Dashboard - WHO. Geneva, Switzerland: World Health Organization (WHO).              |
| South Africa               | Department of Health (South Africa). South Africa National Department of Health Update on Coronavirus. Pretoria, South Africa: Department of Health (South Africa), 2020.                                                               |
| South Africa, Gauteng      | Gauteng Provincial Government (South Africa). South Africa - Gauteng Province COVID-19 Status July 2020. Gauteng, South Africa: Gauteng Provincial Government (South Africa), 2020.                                                     |
| South Africa, Western Cape | Western Cape Government (South Africa). South Africa - Western Cape COVID-19 Dashboard.                                                                                                                                                 |
| South Korea                | Max Planck Institute for Demographic Research. COVerAGE-DB: A database of COVID-19 cases and deaths by age. United States of America: OSF, Center for Open Science (United States).                                                     |
| Spain                      | Ministry of Health, Consumption and Social Welfare (Spain). Spain Ministry of Health, Consumption, and Social Welfare COVID-19 Situation Update. Spain: Ministry of Health, Consumption and Social Welfare (Spain).                     |
| Suriname                   | Max Planck Institute for Demographic Research. COVerAGE-DB: A database of COVID-19 cases and deaths by age. United States of America: OSF, Center for Open Science (United States).                                                     |
| Sweden                     | Max Planck Institute for Demographic Research. COVerAGE-DB: A database of COVID-19 cases and deaths by age. United States of America: OSF, Center for Open Science (United States).                                                     |
| Switzerland                | Max Planck Institute for Demographic Research. COVerAGE-DB: A database of COVID-19 cases and deaths by age. United States of America: OSF, Center for Open Science (United States).                                                     |
| Togo                       | Government of Togo. Coronavirus in Togo: Evolution in Graphics. Lomé, Togo: Government of Togo.                                                                                                                                         |
| Turkey                     | Max Planck Institute for Demographic Research. COVerAGE-DB: A database of COVID-19 cases and deaths by age. United States of America: OSF, Center for Open Science (United States).                                                     |
| UK                         | Office for National Statistics (ONS) (United Kingdom). United Kingdom - England and Wales Deaths Registered Weekly, Provisional.                                                                                                        |
| UK, England                | Max Planck Institute for Demographic Research. COVerAGE-DB: A database of COVID-19 cases and deaths by age. United States of America: OSF, Center for Open Science (United States).                                                     |
| UK, Northern Ireland       | Max Planck Institute for Demographic Research. COVerAGE-DB: A database of COVID-19 cases and deaths by age. United States of America: OSF, Center for Open Science (United States).                                                     |
| UK, Scotland               | Max Planck Institute for Demographic Research. COVerAGE-DB: A database of COVID-19 cases and deaths by age. United States of America: OSF, Center for Open Science (United States).                                                     |
| Ukraine                    | Max Planck Institute for Demographic Research. COVerAGE-DB: A database of COVID-19 cases and deaths by age. United States of America: OSF, Center for Open Science (United States).                                                     |
| Uruguay                    | Max Planck Institute for Demographic Research. COVerAGE-DB: A database of COVID-19 cases and deaths by age. United States of America: OSF, Center for Open Science (United States).                                                     |
| USA                        | National Center for Health Statistics, Centers for Disease Control and Prevention. United States NVSS Provisional Death Counts for Coronavirus Disease (COVID-19): Weekly Updates by Select Demographic and Geographic Characteristics. |
| USA, Alabama               | National Center for Health Statistics, Centers for Disease Control and Prevention. United States NVSS Provisional Death Counts for Coronavirus Disease (COVID-19): Weekly Updates by Select Demographic and Geographic Characteristics. |





|                     |                                                                                                                                                                                                                                         |
|---------------------|-----------------------------------------------------------------------------------------------------------------------------------------------------------------------------------------------------------------------------------------|
| USA, Pennsylvania   | National Center for Health Statistics, Centers for Disease Control and Prevention. United States NVSS Provisional Death Counts for Coronavirus Disease (COVID-19): Weekly Updates by Select Demographic and Geographic Characteristics. |
| USA, Rhode Island   | National Center for Health Statistics, Centers for Disease Control and Prevention. United States NVSS Provisional Death Counts for Coronavirus Disease (COVID-19): Weekly Updates by Select Demographic and Geographic Characteristics. |
| USA, South Carolina | National Center for Health Statistics, Centers for Disease Control and Prevention. United States NVSS Provisional Death Counts for Coronavirus Disease (COVID-19): Weekly Updates by Select Demographic and Geographic Characteristics. |
| USA, South Dakota   | National Center for Health Statistics, Centers for Disease Control and Prevention. United States NVSS Provisional Death Counts for Coronavirus Disease (COVID-19): Weekly Updates by Select Demographic and Geographic Characteristics. |
| USA, Tennessee      | National Center for Health Statistics, Centers for Disease Control and Prevention. United States NVSS Provisional Death Counts for Coronavirus Disease (COVID-19): Weekly Updates by Select Demographic and Geographic Characteristics. |
| USA, Texas          | National Center for Health Statistics, Centers for Disease Control and Prevention. United States NVSS Provisional Death Counts for Coronavirus Disease (COVID-19): Weekly Updates by Select Demographic and Geographic Characteristics. |
| USA, Utah           | National Center for Health Statistics, Centers for Disease Control and Prevention. United States NVSS Provisional Death Counts for Coronavirus Disease (COVID-19): Weekly Updates by Select Demographic and Geographic Characteristics. |
| USA, Vermont        | National Center for Health Statistics, Centers for Disease Control and Prevention. United States NVSS Provisional Death Counts for Coronavirus Disease (COVID-19): Weekly Updates by Select Demographic and Geographic Characteristics. |
| USA, Virginia       | National Center for Health Statistics, Centers for Disease Control and Prevention. United States NVSS Provisional Death Counts for Coronavirus Disease (COVID-19): Weekly Updates by Select Demographic and Geographic Characteristics. |
| USA, Washington     | National Center for Health Statistics, Centers for Disease Control and Prevention. United States NVSS Provisional Death Counts for Coronavirus Disease (COVID-19): Weekly Updates by Select Demographic and Geographic Characteristics. |
| USA, Washington, DC | National Center for Health Statistics, Centers for Disease Control and Prevention. United States NVSS Provisional Death Counts for Coronavirus Disease (COVID-19): Weekly Updates by Select Demographic and Geographic Characteristics. |
| USA, West Virginia  | National Center for Health Statistics, Centers for Disease Control and Prevention. United States NVSS Provisional Death Counts for Coronavirus Disease (COVID-19): Weekly Updates by Select Demographic and Geographic Characteristics. |
| USA, Wisconsin      | National Center for Health Statistics, Centers for Disease Control and Prevention. United States NVSS Provisional Death Counts for Coronavirus Disease (COVID-19): Weekly Updates by Select Demographic and Geographic Characteristics. |
| USA, Wyoming        | National Center for Health Statistics, Centers for Disease Control and Prevention. United States NVSS Provisional Death Counts for Coronavirus Disease (COVID-19): Weekly Updates by Select Demographic and Geographic Characteristics. |

### Section 3: Seroprevalence sources

**Figure S3. Seroprevalence data coverage by location**

#### Serology

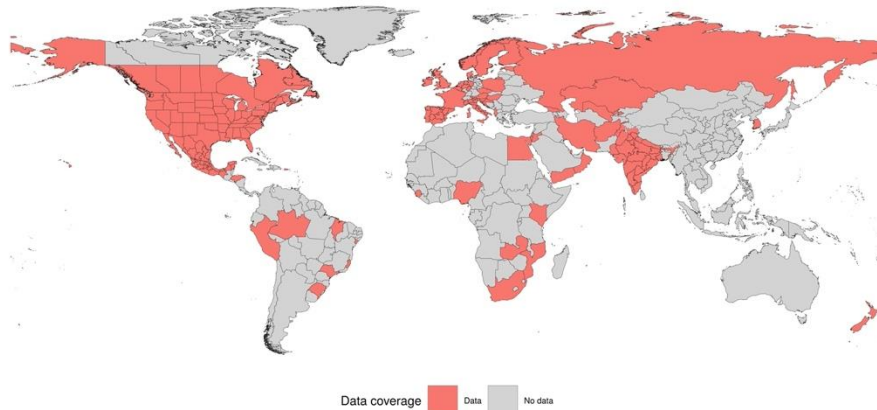

**Table S3. Seroprevalence data sources by location**

| Location         | Source                                                                                                                                                                                                                                                                                                                                                      |
|------------------|-------------------------------------------------------------------------------------------------------------------------------------------------------------------------------------------------------------------------------------------------------------------------------------------------------------------------------------------------------------|
| Afghanistan      | World Health Organization (WHO). Prevalence of COVID-19 and its Related Deaths in Afghanistan: A Nationwide, Population-Based Seroepidemiological Study July 2020. Kabul, Afghanistan: Ministry of Public Health (Afghanistan), 2021.                                                                                                                       |
| Albania          | Sulcebe G, Ylli A, Cenko F, Kurti-Prifti M. Rapid increase of SARS-CoV-2 seroprevalence during the 2020 pandemic year in the population of the city of Tirana, Albania. Preprint. medRxiv. 2021.                                                                                                                                                            |
| Andorra          | Government of Andorra. [Martinez Benazet thanks institutions, volunteers and the population who have participated in the national antibody study]. Government of Andorra [Internet]. 2020 May 28; Press Releases.                                                                                                                                           |
| Andorra          | Royo-Cebrecos C, Vilanova D, López J, Arroyo V, Francisco G, Pons M, Carrasco MG, Piqué JM, Sanz S, Dobaño C, García-Basteiro A. Mass SARS-CoV-2 serological screening for the Principality of Andorra. Preprint. Res Sq. 2020.                                                                                                                             |
| Austria          | Statistics Austria. 4.7% of the Austrian population had antibodies against SARS-CoV-2 in mid / late October. Vienna, Austria: Statistics Austria, 2020.                                                                                                                                                                                                     |
| Belgium          | Sciensano (Belgium). Belgium Prevalence of anti-SARS-CoV-2 antibodies (IgG) among blood donors. Belgium: Sciensano (Belgium).                                                                                                                                                                                                                               |
| Belgium          | Herzog S, De Bie J, Abrams S, Wouters I, Ekinci E, Patteet L, Coppens A, De Spiegeleer S, Beutels P, Van Damme P, Hens N, Theeten H. Seroprevalence of IgG antibodies against SARS coronavirus 2 in Belgium - a serial prospective cross-sectional nationwide study of residual samples. Preprint. medRxiv. 2020.                                           |
| Brazil           | Hallal PC, Hartwig FP, Horta BL, Silveira MF, Struchiner CJ, Vidaletti LP, Neumann NA, Pellanda LC, Dellagostin OA, Burattini MN, Victora GD, Menezes AMB, Barros FC, Barros AJD, Victora CG. SARS-CoV-2 antibody prevalence in Brazil: results from two successive nationwide serological household surveys. Lancet Glob Health. 2020; 8(11): e1390-e1398. |
| Brazil           | Menezes AMB, Victora CG, Hartwig FP, Silveira MF, Horta BL, Barros AJD, Mesenburg MA, Wehrmeister FC, Pellanda LC, Dellagostin OA, Struchiner CJ, Burattini MN, Barros FC, Hallal PC. High prevalence of symptoms among Brazilian subjects with antibodies against SARS-CoV-2. Sci Rep. 2021; 11(1): 13279.                                                 |
| Brazil, Amazonas | Buss LF, Prete CA Jr, Abraham CMM, Mendrone A Jr, Salomon T, de Almeida-Neto C, França RFO, Belotti MC, Carvalho MPSS, Costa AG, Crispim MAE, Ferreira SC, Fraiji NA, Gurzenda S, Whittaker C, Kamaura LT, Takecian PL, da Silva Peixoto P, Oikawa MK, Nishiya AS, Rocha V, Salles NA, de Souza Santos AA, da Silva MA, Custer B, Parag KV, Barral-Netto M, |

|                           |                                                                                                                                                                                                                                                                                                                                                                                                                                                                                                                                                                                                                    |
|---------------------------|--------------------------------------------------------------------------------------------------------------------------------------------------------------------------------------------------------------------------------------------------------------------------------------------------------------------------------------------------------------------------------------------------------------------------------------------------------------------------------------------------------------------------------------------------------------------------------------------------------------------|
|                           | Kraemer MUG, Pereira RHM, Pybus OG, Busch MP, Castro MC, Dye C, Nascimento VH, Faria NR, Sabino EC. Three-quarters attack rate of SARS-CoV-2 in the Brazilian Amazon during a largely unmitigated epidemic. <i>Science</i> . 2021; 371(6526): 288-292.                                                                                                                                                                                                                                                                                                                                                             |
| Brazil, Espírito Santo    | Gomes CC, Cerutti Jr C, Zandonade E, Maciel ELN, Carvalho de Alencar FE, Almada GL, Cardoso OA, Medeiros Jabor P, Zanotti RL, Queiroz Reuter T, Gomes de Andrade VL, Bastos WM, Fernandes de Medeiros Jr N. A population-based study of the prevalence of COVID-19 infection in Espírito Santo, Brazil: methodology and results of the first stage. Preprint. medRxiv. 2020.                                                                                                                                                                                                                                       |
| Brazil, Espírito Santo    | Government of Espírito Santo (Brazil). Brazil - Government of Espírito Santo COVID-19 Serological Survey.                                                                                                                                                                                                                                                                                                                                                                                                                                                                                                          |
| Brazil, Maranhão          | Silva AAM da, Lima Neto LG, Azevedo C de MP e S de, Costa LMM da, Bragança MLBM, Barros Filho AKD, Wittlin BB, Souza BF de, Oliveira BLCA de, Carvalho CA de, Thomaz ÉBAF, Simões Neto EA, Leite Júnior JF, Cosme LMSS, Campos MAG, Queiroz RC de S, Costa SS, Carvalho VA de, Simões VMF, Alves MTSS de B e, Santos AM dos. Population-based seroprevalence of SARS-CoV-2 is more than halfway through the herd immunity threshold in the State of Maranhao, Brazil. Preprint. medRxiv. 2020.                                                                                                                     |
| Brazil, Maranhão          | Secretary of State for Health (Brazil - Maranhão). Prevalence of SARS-CoV-2 virus infection in Maranhão, Brazil, Final Research Report, Phase II, October 2020.                                                                                                                                                                                                                                                                                                                                                                                                                                                    |
| Brazil, Rio Grande do Sul | Government of Rio Grande do Sul. Brazil - Rio Grande Do Sol Epicovid19 Relevance Study 2020.                                                                                                                                                                                                                                                                                                                                                                                                                                                                                                                       |
| Brazil, São Paulo         | Albuquerque JOM, Kamioka GA, Madalosso G, Costa SA, Ferreira PB, Pino FA, Sato APS, Carvalho ACA, Amorim ABP, Aires CC, Kataoka APAG, Savani ESMM, Bessa TAF, Aguiar BS, Failla MA, Santos EA, Brito EMT, Santos MCH, Silva SMS, Caldeira LAV, Zamarco LC, Fonseca SMS, Lima MMC, Marques IA, Silva FEV, Glasser PR, Burihan PCPR, Cavazzana CL, Lara RC, Mello DS, Pellini ACG, Nishio FY, Kian FM, Braga ES, Bertelli NMP, Fracini W, Gonçalves MDA, Zular PS, Piva RS, Masi E de. Prevalence evolution of SARS-CoV-2 infection in the Municipality of São Paulo, 2020 - 2021. medRxiv. 2021.                    |
| Brazil, São Paulo         | Buss LF, Prete CA Jr, Abraham CMM, Mendrone A Jr, Salomon T, de Almeida-Neto C, França RFO, Belotti MC, Carvalho MPSS, Costa AG, Crispim MAE, Ferreira SC, Fraiji NA, Gurzenda S, Whittaker C, Kamaura LT, Takecian PL, da Silva Peixoto P, Oikawa MK, Nishiya AS, Rocha V, Salles NA, de Souza Santos AA, da Silva MA, Custer B, Parag KV, Barral-Netto M, Kraemer MUG, Pereira RHM, Pybus OG, Busch MP, Castro MC, Dye C, Nascimento VH, Faria NR, Sabino EC. Three-quarters attack rate of SARS-CoV-2 in the Brazilian Amazon during a largely unmitigated epidemic. <i>Science</i> . 2021; 371(6526): 288-292. |
| Brazil, São Paulo         | Brazilian Institute of Public Opinion and Statistics (IBOPE), Fleury Group, SEMEIA Institute (Brazil). Brazil - São Paulo Household Survey to Estimate the Seroprevalence of SARS-CoV-2 Infection, Pilot Study (SoroEpi MSP).                                                                                                                                                                                                                                                                                                                                                                                      |
| Brazil, São Paulo         | Brazilian Institute of Public Opinion and Statistics (IBOPE), Fleury Group, SEMEIA Institute (Brazil). Brazil - São Paulo Household Survey to Estimate the Seroprevalence of SARS-CoV-2 Infection, Phase 2 (SoroEpi MSP).                                                                                                                                                                                                                                                                                                                                                                                          |
| Brazil, Sergipe           | Federal University of Sergipe (Brazil). Brazil - Evolution of the Prevalence of Infection by SARS-CoV-2 in Sergipe. Third Phase Results: February 18 to March 30, 2021.                                                                                                                                                                                                                                                                                                                                                                                                                                            |
| Canada                    | Investigators A to beat coronavirus/Action pour battre le coronavirus (Ab-CS, Jha P. COVID Seroprevalence, Symptoms and Mortality During the First Wave of SARS-CoV-2 in Canada. medRxiv. 2021.                                                                                                                                                                                                                                                                                                                                                                                                                    |
| Canada                    | Canadian Blood Services. Canada COVID-19 Seroprevalence Report - August 19, 2020. Ottawa, Canada: Canadian Blood Services, 2020.                                                                                                                                                                                                                                                                                                                                                                                                                                                                                   |
| Canada                    | Canadian Blood Services. Canada COVID-19 Seroprevalence Report - December 18, 2020. Ottawa, Canada: Canadian Blood Services, 2020.                                                                                                                                                                                                                                                                                                                                                                                                                                                                                 |
| Canada                    | Canadian Blood Services. Canada COVID-19 Seroprevalence Report - January 12, 2021. Ottawa, Canada: Canadian Blood Services, 2021.                                                                                                                                                                                                                                                                                                                                                                                                                                                                                  |
| Canada                    | Canadian Blood Services. Canada COVID-19 Seroprevalence Report - April 2020 to January 2021. Ottawa, Canada: Canadian Blood Services, 2021.                                                                                                                                                                                                                                                                                                                                                                                                                                                                        |

|                                   |                                                                                                                                                                                                 |
|-----------------------------------|-------------------------------------------------------------------------------------------------------------------------------------------------------------------------------------------------|
| Canada, Alberta                   | Canadian Blood Services. Canada COVID-19 Seroprevalence Report - August 19, 2020. Ottawa, Canada: Canadian Blood Services, 2020.                                                                |
| Canada, Alberta                   | Saeed S, Drews SJ, Pambrun C, Yi QL, Osmond L, O'Brien SF. SARS-CoV-2 seroprevalence among blood donors after the first COVID-19 wave in Canada. Transfusion. 2021; 61(3): 862-872.             |
| Canada, Alberta                   | Canadian Blood Services. Canada COVID-19 Seroprevalence Report - December 18, 2020. Ottawa, Canada: Canadian Blood Services, 2020.                                                              |
| Canada, Alberta                   | Canadian Blood Services. Canada COVID-19 Seroprevalence Report - January 12, 2021. Ottawa, Canada: Canadian Blood Services, 2021.                                                               |
| Canada, British Columbia          | Investigators A to beat coronavirus/Action pour battre le coronavirus (Ab-CS, Jha P. COVID Seroprevalence, Symptoms and Mortality During the First Wave of SARS-CoV-2 in Canada. medRxiv. 2021. |
| Canada, British Columbia          | Canadian Blood Services. Canada COVID-19 Seroprevalence Report - August 19, 2020. Ottawa, Canada: Canadian Blood Services, 2020.                                                                |
| Canada, British Columbia          | Saeed S, Drews SJ, Pambrun C, Yi QL, Osmond L, O'Brien SF. SARS-CoV-2 seroprevalence among blood donors after the first COVID-19 wave in Canada. Transfusion. 2021; 61(3): 862-872.             |
| Canada, British Columbia          | Canadian Blood Services. Canada COVID-19 Seroprevalence Report - December 18, 2020. Ottawa, Canada: Canadian Blood Services, 2020.                                                              |
| Canada, British Columbia          | Canadian Blood Services. Canada COVID-19 Seroprevalence Report - January 12, 2021. Ottawa, Canada: Canadian Blood Services, 2021.                                                               |
| Canada, Manitoba                  | Canadian Blood Services. Canada COVID-19 Seroprevalence Report - December 18, 2020. Ottawa, Canada: Canadian Blood Services, 2020.                                                              |
| Canada, Manitoba                  | Canadian Blood Services. Canada COVID-19 Seroprevalence Report - January 12, 2021. Ottawa, Canada: Canadian Blood Services, 2021.                                                               |
| Canada, New Brunswick             | Canadian Blood Services. Canada COVID-19 Seroprevalence Report - August 19, 2020. Ottawa, Canada: Canadian Blood Services, 2020.                                                                |
| Canada, New Brunswick             | Canadian Blood Services. Canada COVID-19 Seroprevalence Report - December 18, 2020. Ottawa, Canada: Canadian Blood Services, 2020.                                                              |
| Canada, New Brunswick             | Canadian Blood Services. Canada COVID-19 Seroprevalence Report - January 12, 2021. Ottawa, Canada: Canadian Blood Services, 2021.                                                               |
| Canada, Newfoundland and Labrador | Canadian Blood Services. Canada COVID-19 Seroprevalence Report - August 19, 2020. Ottawa, Canada: Canadian Blood Services, 2020.                                                                |
| Canada, Newfoundland and Labrador | Canadian Blood Services. Canada COVID-19 Seroprevalence Report - December 18, 2020. Ottawa, Canada: Canadian Blood Services, 2020.                                                              |
| Canada, Newfoundland and Labrador | Canadian Blood Services. Canada COVID-19 Seroprevalence Report - January 12, 2021. Ottawa, Canada: Canadian Blood Services, 2021.                                                               |
| Canada, Nova Scotia               | Canadian Blood Services. Canada COVID-19 Seroprevalence Report - August 19, 2020. Ottawa, Canada: Canadian Blood Services, 2020.                                                                |
| Canada, Nova Scotia               | Canadian Blood Services. Canada COVID-19 Seroprevalence Report - December 18, 2020. Ottawa, Canada: Canadian Blood Services, 2020.                                                              |
| Canada, Nova Scotia               | Canadian Blood Services. Canada COVID-19 Seroprevalence Report - January 12, 2021. Ottawa, Canada: Canadian Blood Services, 2021.                                                               |



|                      |                                                                                                                                                                                                                                                                                                                                                                                                                 |
|----------------------|-----------------------------------------------------------------------------------------------------------------------------------------------------------------------------------------------------------------------------------------------------------------------------------------------------------------------------------------------------------------------------------------------------------------|
| Canada, Ontario      | Bolotin S, Tran V, Osman S, Brown KA, Buchan SA, Joh E, Deeks SL, Allen VG. SARS-CoV-2 Seroprevalence Survey Estimates Are Affected by Anti-Nucleocapsid Antibody Decline. <i>J Infect Dis.</i> 2021; 223(8): 1334-1338.                                                                                                                                                                                        |
| Canada, Ontario      | Investigators A to beat coronavirus/Action pour battre le coronavirus (Ab-CS, Jha P. COVID Seroprevalence, Symptoms and Mortality During the First Wave of SARS-CoV-2 in Canada. medRxiv. 2021.                                                                                                                                                                                                                 |
| Canada, Ontario      | Canadian Blood Services. Canada COVID-19 Seroprevalence Report - August 19, 2020. Ottawa, Canada: Canadian Blood Services, 2020.                                                                                                                                                                                                                                                                                |
| Canada, Ontario      | Saeed S, Drews SJ, Pambrun C, Yi QL, Osmond L, O'Brien SF. SARS-CoV-2 seroprevalence among blood donors after the first COVID-19 wave in Canada. <i>Transfusion.</i> 2021; 61(3): 862-872.                                                                                                                                                                                                                      |
| Canada, Ontario      | Canadian Blood Services. Canada COVID-19 Seroprevalence Report - December 18, 2020. Ottawa, Canada: Canadian Blood Services, 2020.                                                                                                                                                                                                                                                                              |
| Canada, Ontario      | Canadian Blood Services. Canada COVID-19 Seroprevalence Report - January 12, 2021. Ottawa, Canada: Canadian Blood Services, 2021.                                                                                                                                                                                                                                                                               |
| Canada, Ontario      | Government of Ontario (Canada), Public Health Ontario (Canada). Canada COVID-19 Seroprevalence in Ontario: March 27, 2020 to June 30, 2020. Canada: Public Health Ontario (Canada), 2020.                                                                                                                                                                                                                       |
| Canada, Ontario      | Government of Ontario (Canada), Public Health Ontario (Canada). Canada COVID-19 Seroprevalence in Ontario: July 4 to July 31, 2020. Canada: Public Health Ontario (Canada), 2020.                                                                                                                                                                                                                               |
| Canada, Ontario      | Government of Ontario (Canada), Public Health Ontario (Canada). Canada COVID-19 Seroprevalence in Ontario: August 1 to August 31, 2020. Canada: Public Health Ontario (Canada), 2020.                                                                                                                                                                                                                           |
| Canada, Ontario      | Government of Ontario (Canada), Public Health Ontario (Canada). Canada COVID-19 Seroprevalence in Ontario: September 3 to October 30, 2020. Canada: Public Health Ontario (Canada), 2020.                                                                                                                                                                                                                       |
| Canada, Quebec       | Investigators A to beat coronavirus/Action pour battre le coronavirus (Ab-CS, Jha P. COVID Seroprevalence, Symptoms and Mortality During the First Wave of SARS-CoV-2 in Canada. medRxiv. 2021.                                                                                                                                                                                                                 |
| Canada, Quebec       | Hema-Quebec (Canada), Quebec National Institute of Public Health (Canada). Canada - Quebec COVID-19 First Wave Blood Donor Seroprevalence Study 2020. Canada: Hema-Quebec (Canada).                                                                                                                                                                                                                             |
| Canada, Saskatchewan | Canadian Blood Services. Canada COVID-19 Seroprevalence Report - January 12, 2021. Ottawa, Canada: Canadian Blood Services, 2021.                                                                                                                                                                                                                                                                               |
| Croatia              | Vilibic-Cavlek T, Stevanovic V, Ilic M, Barbic L, Capak K, Tabain I, Krleza JL, Ferenc T, Hruskar Z, Topic RZ, Kaliterna V, Antolovic-Pozgajn A, Kucinar J, Koscak I, Mayer D, Sviben M, Antolasic L, Milasincic L, Bucic L, Ferencak I, Kaic B. SARS-CoV-2 Seroprevalence and Neutralizing Antibody Response after the First and Second COVID-19 Pandemic Wave in Croatia. <i>Pathogens.</i> 2021; 10(6): 774. |
| Czechia              | Piler P, Thon V, Andrýsková L, Doležel K, Kostka D, Pavlík T, Dušek L, Pikhart H, Bobák M, Matic S, Klánová J. Dynamics of seroconversion of anti-SARS-CoV-2 IgG antibodies in the Czech unvaccinated population: nationwide prospective seroconversion (PROSECO) study. Preprint. medRxiv. 2021.                                                                                                               |
| Denmark              | Blood Donor (Denmark). Denmark Blood Donors are Now Being Re-examined for Coronavirus Infection. Denmark: Blood Donor (Denmark), 2020.                                                                                                                                                                                                                                                                          |
| Denmark              | Erikstrup C, Hother CE, Pedersen OBV, Mølbak K, Skov RL, Holm DK, Sækmose SG, Nilsson AC, Brooks PT, Boldsen JK, Mikkelsen C, Gybel-Brask M, Sørensen E, Dinh KM, Mikkelsen S, Møller BK, Haunstrup T, Harrithøj L, Jensen BA, Hjalgrim H, Lillevang ST, Ullum H. Estimation of SARS-CoV-2 infection fatality rate by real-time antibody screening of blood donors. <i>Clin Infect Dis.</i> 2020.               |
| Denmark              | Espenhain L, Tribler S, Jørgensen CS, Hansen CH, Sönksen UW, Ethelberg S. Prevalence of SARS-CoV-2 antibodies in Denmark 2020: results from nationwide, population-based sero-epidemiological surveys. Preprint. medRxiv. 2021.                                                                                                                                                                                 |

|                                 |                                                                                                                                                                                                                                                                                                                                                                                                                                                                                                                                                                                                                  |
|---------------------------------|------------------------------------------------------------------------------------------------------------------------------------------------------------------------------------------------------------------------------------------------------------------------------------------------------------------------------------------------------------------------------------------------------------------------------------------------------------------------------------------------------------------------------------------------------------------------------------------------------------------|
| Egypt                           | Gomaa MR, El Rifay AS, Shehata M, Kandeil A, Nabil Kamel M, Marouf MA, GabAllah M, El Taweel A, Kayed AE, Kutkat O, Moatasim Y, Mahmoud SH, Abo Shama NM, El Sayes M, Mostafa A, El-Shesheny R, McKenzie PP, Webby RJ, Kayali G, Ali MA. Incidence, household transmission, and neutralizing antibody seroprevalence of Coronavirus Disease 2019 in Egypt: Results of a community-based cohort. <i>PLOS Pathog.</i> 2021; 17(3): e1009413.                                                                                                                                                                       |
| Estonia                         | Soeorg H, Jõgi P, Naaber P, Ottas A, Toompere K, Lutsar I. Anti-spike protein receptor-binding domain IgG levels after COVID-19 infection or vaccination against SARS-CoV-2 in a seroprevalence study. Preprint. medRxiv. 2021.                                                                                                                                                                                                                                                                                                                                                                                  |
| Estonia                         | University of Tartu. Estonia COVID-19 Coronavirus prevalence study.                                                                                                                                                                                                                                                                                                                                                                                                                                                                                                                                              |
| Finland                         | National Institute for Health and Welfare (THL) (Finland). Finland Weekly Report of the Population Serology Survey of the Corona Epidemic. Helsinki, Finland: National Institute for Health and Welfare (THL) (Finland).                                                                                                                                                                                                                                                                                                                                                                                         |
| France                          | Warszawski J, Bajos N, Meyer L, de Lamballerie X, Seng R, Beaumont A, Slama R, Hisbergues M, Rahib D, Lydie N, Legendre B, Barlet M, Rey S, Raynaud P, Leduc A, Costemalle V, Beck F, Legleye S, Castell L, Givord P, Favre-Martinoz C, Paliot N, Sihol J, Sillard P. In May 2020, 4.5% of the population of metropolitan France had developed antibodies against SARS-CoV-2. <i>Études et Résultats.</i> 2020; (1167): 1-6.                                                                                                                                                                                     |
| France                          | Vu SL, Jones G, Anna F, Rose T, Richard J-B, Bernard-Stoecklin S, Goyard S, Demeret C, Helynck O, Robin C, Monnet V, Facci LP de, Ungeheuer M-N, Léon L, Guillois Y, Filleul L, Charneau P, Lévy-Bruhl D, van der Werf S, Noel H. Prevalence of SARS-CoV-2 antibodies in France: results from nationwide serological surveillance. Preprint. medRxiv. 2020.                                                                                                                                                                                                                                                      |
| Georgia                         | *                                                                                                                                                                                                                                                                                                                                                                                                                                                                                                                                                                                                                |
| Germany                         | Robert Koch Institute. Coronavirus Disease (COVID-19) Nationwide Monitoring, Overview of First Results (RKI-SOEP study) - Robert Koch Institute. Berlin, Germany: Robert Koch Institute, 2021.                                                                                                                                                                                                                                                                                                                                                                                                                   |
| Germany                         | Federal Ministry of Health (Germany). The Germans and Corona, Final Report of the Federal Ministry of Health's 'Corona-BUND-Study' . 2020.                                                                                                                                                                                                                                                                                                                                                                                                                                                                       |
| Germany, Hesse                  | Bastian F, Cornelius K, Tanja V. SARS-CoV-2 IgG seroprevalence in blood donors located in three different federal states, Germany, March to June 2020. <i>Euro Surveill.</i> 2020; 25(28).                                                                                                                                                                                                                                                                                                                                                                                                                       |
| Germany, Lower Saxony           | Bastian F, Cornelius K, Tanja V. SARS-CoV-2 IgG seroprevalence in blood donors located in three different federal states, Germany, March to June 2020. <i>Euro Surveill.</i> 2020; 25(28).                                                                                                                                                                                                                                                                                                                                                                                                                       |
| Germany, North Rhine-Westphalia | Bastian F, Cornelius K, Tanja V. SARS-CoV-2 IgG seroprevalence in blood donors located in three different federal states, Germany, March to June 2020. <i>Euro Surveill.</i> 2020; 25(28).                                                                                                                                                                                                                                                                                                                                                                                                                       |
| Germany, Saarland               | Saarland University Hospital and Medical Faculty of Saarland University. Germany - Saarland antibody study on coronavirus infection completed: Institute for Virology at Saarland University Hospital presents results. Saarland University Hospital and Medical Faculty of Saarland University [Internet]. 2021 Jan 21.                                                                                                                                                                                                                                                                                         |
| Honduras                        | Núñez MRM, Lara JÁ, Pleitez SJA, Ramírez GA. [Seroepidemiological surveillance of SARS-CoV-2 circulation in 41 municipalities in Honduras with no report of active cases, COVID-19, June 16-23, 2020]. <i>Poblac Salud Mesoam.</i> 2021; 18(2).                                                                                                                                                                                                                                                                                                                                                                  |
| Hungary                         | Merkely B, Szabó AJ, Kosztin A, Berényi E, Sebestyén A, Lengyel C, Merkely G, Karády J, Várkonyi I, Papp C, Miseta A, Betlehem J, Burián K, Csóka I, Vásárhelyi B, Ludwig E, Prinz G, Sinkó J, Hankó B, Varga P, Fülöp GÁ, Mag K, Vokó Z, HUNGarian CORonaVirus-19 Epidemiological Research (H-UNCOVER) investigators. Novel coronavirus epidemic in the Hungarian population, a cross-sectional nationwide survey to support the exit policy in Hungary. <i>GeroScience.</i> 2020; 42(4): 1063-74.                                                                                                              |
| India                           | Naushin S, Sardana V, Ujjainiya R, Bhatheja N, Kutum R, Bhaskar AK, Pradhan S, Prakash S, Khan R, Rawat BS, Tallapaka KB, Anumalla M, Chandak GR, Lahiri A, Kar S, Mulay SR, Mugale MN, Srivastava M, Khan S, Srivastava A, Tomar B, Veerapandian M, Venkatachalam G, Vijayakumar SR, Agarwal A, Gupta D, Halami PH, Peddha MS, Sundaram GM, Veeranna RP, Pal A, Agarwal VK, Maurya AK, Singh RVK, Raman AK, Anandasadagopan SK, Karuppanan P, Venkatesan S, Sardana HK, Kothari A, Jain R, Thakur A, Parihar DS, Saifi A, Kaur J, Kumar V, Mishra A, Gogeri I, Rayasam G, Singh P, Chakraborty R, Chaturvedi G, |

|                       |                                                                                                                                                                                                                                                                                                                                                                                                                                                                                                                                                                                                                                                                                                                                                                                                                                                                                                                                                                                                |
|-----------------------|------------------------------------------------------------------------------------------------------------------------------------------------------------------------------------------------------------------------------------------------------------------------------------------------------------------------------------------------------------------------------------------------------------------------------------------------------------------------------------------------------------------------------------------------------------------------------------------------------------------------------------------------------------------------------------------------------------------------------------------------------------------------------------------------------------------------------------------------------------------------------------------------------------------------------------------------------------------------------------------------|
|                       | Karunakar P, Yadav R, Singhmar S, Singh D, Sarkar S, Bhattacharya P, Acharya S, Singh V, Verma S, Soni D, Seth S, Vashisht S, Thakran S, Fatima F, Singh AP, Sharma A, Sharma B, Subramanian M, Padwad Y, Hallan V, Patial V, Singh D, Tirpude NV, Chakrabarti P, Maity SK, Ganguly D, Sarkar J, Ramakrishna S. Insights from a Pan India Sero-Epidemiological survey (Phenome-India Cohort) for SARS-CoV2. Preprint. medRxiv. 2021.                                                                                                                                                                                                                                                                                                                                                                                                                                                                                                                                                           |
| India                 | Murhekar MV, Bhatnagar T, Thangaraj J, Saravanakumar V, Kumar MS, Selvaraju S, Rade K, Kumar C, Sabarinathan R, Turuk A, Asthana S, Balachandar R, Bangar SD, Bansal AK, Chopra V, Das D, Deb AK, Devi KR, Dhikav V, Dwivedi GR, ICMR Serosurveillance Group (2021). I SARS-CoV-2 seroprevalence among the general population and healthcare workers in India, December 2020-January 2021. 2021; 108: 145-155.                                                                                                                                                                                                                                                                                                                                                                                                                                                                                                                                                                                 |
| India                 | Government of India. India COVID-19 Official Government of India updates - Twitter.                                                                                                                                                                                                                                                                                                                                                                                                                                                                                                                                                                                                                                                                                                                                                                                                                                                                                                            |
| India                 | Murhekar MV, Bhatnagar T, Selvaraju S, Rade K, Saravanakumar V, Vivian Thangaraj JW, Kumar MS, Shah N, Sabarinathan R, Turuk A, Anand PK, Asthana S, Balachandar R, Bangar SD, Bansal AK, Bhat J, Chakraborty D, Rangaraju C, Chopra V, Das D, Deb AK, Devi KR, Dwivedi GR, Salim Khan SM, Haq I, Kumar MS, Laxmaiah A, Madhuka, Mahapatra A, Mitra A, Nirmala AR, Pagdhune A, Qurieshi MA, Ramarao T, Sahay S, Sharma YK, Shrinivasa MB, Shukla VK, Singh PK, Viramgami A, Wilson VC, Yadav R, Girish Kumar CP, Luke HE, Ranganathan UD, Babu S, Sekar K, Yadav PD, Sapkal GN, Das A, Das P, Dutta S, Hemalatha R, Kumar A, Narain K, Narasimhaiah S, Panda S, Pati S, Patil S, Sarkar K, Singh S, Kant R, Tripathy S, Toteja GS, Babu GR, Kant S, Muliylil JP, Pandey RM, Sarkar S, Singh SK, Zodepy S, Gangakhedkar RR, S Reddy DC, Bhargava B. Prevalence of SARS-CoV-2 infection in India: Findings from the national serosurvey, May-June 2020. Indian J Med Res. 2020; 152(1,2): 48-60. |
| India                 | Murhekar MV, Bhatnagar T, Selvaraju S, Saravanakumar V, Thangaraj JWV, Shah N, Kumar MS, Rade K, Sabarinathan R, Asthana S, Balachandar R, Bangar SD, Bansal AK, Bhat J, Chopra V, Das D, Deb AK, Devi KR, Dwivedi GR, Khan SMS, Kumar CPG, Kumar MS, Laxmaiah A, Madhukar M, Mahapatra A, Mohanty SS, Rangaraju C, Turuk A, Baradwaj DK, Chahal AS, Debnath F, Haq I, Kalliath A, Kanungo S, Kshatri JS, Lakshmi GGJN, Mitra A, Nirmala AR, Prasad GV, Qurieshi MA, Sahay S, Sangwan RK, Sekar K, Shukla VK, Singh PK, Singh P, Singh R, Varma DS, Viramgami A, Panda S, Reddy DCS, Bhargava B, ICMR Serosurveillance Group. SARS-CoV-2 antibody seroprevalence in India, August-September, 2020: findings from the second nationwide household serosurvey. Lancet Glob Health. 2021; 9(3): e257-e266.                                                                                                                                                                                        |
| India, Andhra Pradesh | Pandey A. Andhra Pradesh Sero Survey Show Nearly 20% of State's Population Exposed to Covid-19. India Today [Internet]. 2020 Sept 11.                                                                                                                                                                                                                                                                                                                                                                                                                                                                                                                                                                                                                                                                                                                                                                                                                                                          |
| India, Andhra Pradesh | Sadam R. 20% of Andhra Exposed to Covid, Sero-survey Finds, Exposure Highest Where Case Tally Lowest. ThePrint [Internet]. 2020 Sept 11.                                                                                                                                                                                                                                                                                                                                                                                                                                                                                                                                                                                                                                                                                                                                                                                                                                                       |
| India, Andhra Pradesh | Rao U. Andhra Pradesh: '59% found to have Covid antibodies in sero-survey'. The Times of India [Internet]. 2021 May 27; Visakhapatnam.                                                                                                                                                                                                                                                                                                                                                                                                                                                                                                                                                                                                                                                                                                                                                                                                                                                         |
| India, Andhra Pradesh | *                                                                                                                                                                                                                                                                                                                                                                                                                                                                                                                                                                                                                                                                                                                                                                                                                                                                                                                                                                                              |
| India, Andhra Pradesh | Mordani S. Seropositivity highest in Madhya Pradesh, lowest in Kerala, finds ICMR's national sero-survey. India Today [Internet]. 2021 Jul 28.                                                                                                                                                                                                                                                                                                                                                                                                                                                                                                                                                                                                                                                                                                                                                                                                                                                 |
| India, Assam          | Pathak J, Das M, Siddique K. Assessment of Anti-SARS CoV-2 seroprevalence in habitants of Assam (AASSHA): report of the first serosurvey in Assam. Int J Community Med Public Health. 2021; 8(5): 2490-6.                                                                                                                                                                                                                                                                                                                                                                                                                                                                                                                                                                                                                                                                                                                                                                                      |
| India, Assam          | *                                                                                                                                                                                                                                                                                                                                                                                                                                                                                                                                                                                                                                                                                                                                                                                                                                                                                                                                                                                              |
| India, Assam          | Mordani S. Seropositivity highest in Madhya Pradesh, lowest in Kerala, finds ICMR's national sero-survey. India Today [Internet]. 2021 Jul 28.                                                                                                                                                                                                                                                                                                                                                                                                                                                                                                                                                                                                                                                                                                                                                                                                                                                 |
| India, Bihar          | *                                                                                                                                                                                                                                                                                                                                                                                                                                                                                                                                                                                                                                                                                                                                                                                                                                                                                                                                                                                              |
| India, Bihar          | Mordani S. Seropositivity highest in Madhya Pradesh, lowest in Kerala, finds ICMR's national sero-survey. India Today [Internet]. 2021 Jul 28.                                                                                                                                                                                                                                                                                                                                                                                                                                                                                                                                                                                                                                                                                                                                                                                                                                                 |
| India, Chhattisgarh   | Outlook India. C"garh: 5.5 pc people have COVID-19 antibodies, says sero survey. Outlook India [Internet]. 2020 Oct 3.                                                                                                                                                                                                                                                                                                                                                                                                                                                                                                                                                                                                                                                                                                                                                                                                                                                                         |

|                                   |                                                                                                                                                                                                                                                                                                                                                                                                                                                    |
|-----------------------------------|----------------------------------------------------------------------------------------------------------------------------------------------------------------------------------------------------------------------------------------------------------------------------------------------------------------------------------------------------------------------------------------------------------------------------------------------------|
| India, Chhattisgarh               | *                                                                                                                                                                                                                                                                                                                                                                                                                                                  |
| India, Chhattisgarh               | Mordani S. Seropositivity highest in Madhya Pradesh, lowest in Kerala, finds ICMR's national sero-survey. India Today [Internet]. 2021 Jul 28.                                                                                                                                                                                                                                                                                                     |
| India, Delhi                      | Express News Service. Press Briefing: Sero Survey Delhi. IndiaSpend [Internet]. 2020 Aug 20.                                                                                                                                                                                                                                                                                                                                                       |
| India, Delhi                      | Jain P. Over 56% of Delhi has Covid-19 Antibodies: Health Minister Satyendar Jain on 5th Serosurvey. India Today [Internet]. 2021 Feb 2.                                                                                                                                                                                                                                                                                                           |
| India, Delhi                      | Dey S. Serial SARS-CoV-2 Seroprevalence Studies in Delhi July-August 2020: Indications of Pre-existing Cross-reactive Antibodies and Implications for Disease Progression. Res Sq. 2020.                                                                                                                                                                                                                                                           |
| India, Delhi                      | Sharma N, Sharma P, Basu S, Saxena S, Chawla R, Dushyant K, Mundeja N, Marak ZS, Singh S, Singh GK, Rustagi R. The seroprevalence and trends of SARS-CoV-2 in Delhi, India: A repeated population-based seroepidemiological study. Preprint. medRxiv. 2020                                                                                                                                                                                         |
| India, Delhi                      | Press Trust of India. 29.1% people in Delhi developed antibodies against COVID-19, finds latest sero-survey. Firstpost [Internet]. 2020 Aug 20.                                                                                                                                                                                                                                                                                                    |
| India, Goa                        | Naushin S, Sardana V, Ujjainiya R, et al. Insights from a Pan India Sero-Epidemiological survey (Phenome-India Cohort) for SARS-CoV2. Iqbal J, Zaidi M, Kanitkar M, Agrawal M, editors. eLife eLife Sciences Publications Ltd. 2021; 10: e66537.                                                                                                                                                                                                   |
| India, Gujarat                    | *                                                                                                                                                                                                                                                                                                                                                                                                                                                  |
| India, Gujarat                    | Mordani S. Seropositivity highest in Madhya Pradesh, lowest in Kerala, finds ICMR's national sero-survey. India Today [Internet]. 2021 Jul 28.                                                                                                                                                                                                                                                                                                     |
| India, Haryana                    | Health Department, Haryana (India). India - Haryana Covid -19 Sero Survey Round 1, August 2020. India: Health Department, Haryana (India).                                                                                                                                                                                                                                                                                                         |
| India, Haryana                    | Health Department, Haryana (India). India - Haryana Covid-19 Sero Survey Round 2, October 2020.                                                                                                                                                                                                                                                                                                                                                    |
| India, Haryana                    | Mordani S. Seropositivity highest in Madhya Pradesh, lowest in Kerala, finds ICMR's national sero-survey. India Today [Internet]. 2021 Jul 28.                                                                                                                                                                                                                                                                                                     |
| India, Himachal Pradesh           | Mordani S. Seropositivity highest in Madhya Pradesh, lowest in Kerala, finds ICMR's national sero-survey. India Today [Internet]. 2021 Jul 28.                                                                                                                                                                                                                                                                                                     |
| India, Himachal Pradesh           | Naushin S, Sardana V, Ujjainiya R, et al. Insights from a Pan India Sero-Epidemiological survey (Phenome-India Cohort) for SARS-CoV2. Iqbal J, Zaidi M, Kanitkar M, Agrawal M, editors. eLife eLife Sciences Publications Ltd. 2021; 10: e66537.                                                                                                                                                                                                   |
| India, Jammu & Kashmir and Ladakh | Mordani S. Seropositivity highest in Madhya Pradesh, lowest in Kerala, finds ICMR's national sero-survey. India Today [Internet]. 2021 Jul 28.                                                                                                                                                                                                                                                                                                     |
| India, Jharkhand                  | Phase 2 of Sero Survey Begins in Latehar, Simdega, Pakur. Telegraph [Internet]. 2020 Aug 20.                                                                                                                                                                                                                                                                                                                                                       |
| India, Jharkhand                  | *                                                                                                                                                                                                                                                                                                                                                                                                                                                  |
| India, Jharkhand                  | Mordani S. Seropositivity highest in Madhya Pradesh, lowest in Kerala, finds ICMR's national sero-survey. India Today [Internet]. 2021 Jul 28.                                                                                                                                                                                                                                                                                                     |
| India, Jharkhand                  | The Times of India. Jharkhand: 45% of population in 10 districts positive before 2nd wave: Sero survey . Mumbai, India: The Times of India, 2021.                                                                                                                                                                                                                                                                                                  |
| India, Karnataka                  | *                                                                                                                                                                                                                                                                                                                                                                                                                                                  |
| India, Karnataka                  | Mordani S. Seropositivity highest in Madhya Pradesh, lowest in Kerala, finds ICMR's national sero-survey. India Today [Internet]. 2021 Jul 28.                                                                                                                                                                                                                                                                                                     |
| India, Karnataka                  | Babu GR, Sundaresan R, Athreya S, Akhtar J, Pandey PK, Maroor PS, Padma MR, Lalitha R, Shariff M, Krishnappa L, Manjunath CN, Sudarshan MK, Gururaj G, Ranganath TS, Kumar V, Banandur P, Deepa R, Shiju S, Lobo E, Satapathy A, Alahari L, Prameela, Vinitha T, Desai A, Ravi V. The burden of active infection and anti-SARS-CoV-2 IgG antibodies in the general population: Results from a statewide survey in Karnataka, India. medRxiv. 2020. |

|                       |                                                                                                                                                                                                            |
|-----------------------|------------------------------------------------------------------------------------------------------------------------------------------------------------------------------------------------------------|
| India, Karnataka      | Mohanani M, Malani A, Krishnan K, Acharya A. Prevalence of SARS-CoV-2 in Karnataka, India. JAMA. 2021; 325(10): 1001-3.                                                                                    |
| India, Kerala         | Department of Health and Family Welfare, Government of Kerala (India). India - Kerala COVID-19 ICMR Sero Surveillance 2nd Round August 2020.                                                               |
| India, Kerala         | *                                                                                                                                                                                                          |
| India, Kerala         | Mordani S. Seropositivity highest in Madhya Pradesh, lowest in Kerala, finds ICMR's national sero-survey. India Today [Internet]. 2021 Jul 28.                                                             |
| India, Madhya Pradesh | *                                                                                                                                                                                                          |
| India, Madhya Pradesh | Mordani S. Seropositivity highest in Madhya Pradesh, lowest in Kerala, finds ICMR's national sero-survey. India Today [Internet]. 2021 Jul 28.                                                             |
| India, Maharashtra    | *                                                                                                                                                                                                          |
| India, Maharashtra    | Mordani S. Seropositivity highest in Madhya Pradesh, lowest in Kerala, finds ICMR's national sero-survey. India Today [Internet]. 2021 Jul 28.                                                             |
| India, Odisha         | *                                                                                                                                                                                                          |
| India, Odisha         | Mordani S. Seropositivity highest in Madhya Pradesh, lowest in Kerala, finds ICMR's national sero-survey. India Today [Internet]. 2021 Jul 28.                                                             |
| India, Punjab         | *                                                                                                                                                                                                          |
| India, Punjab         | Mordani S. Seropositivity highest in Madhya Pradesh, lowest in Kerala, finds ICMR's national sero-survey. India Today [Internet]. 2021 Jul 28.                                                             |
| India, Rajasthan      | *                                                                                                                                                                                                          |
| India, Rajasthan      | Mordani S. Seropositivity highest in Madhya Pradesh, lowest in Kerala, finds ICMR's national sero-survey. India Today [Internet]. 2021 Jul 28.                                                             |
| India, Tamil Nadu     | *                                                                                                                                                                                                          |
| India, Tamil Nadu     | Mordani S. Seropositivity highest in Madhya Pradesh, lowest in Kerala, finds ICMR's national sero-survey. India Today [Internet]. 2021 Jul 28.                                                             |
| India, Tamil Nadu     | Hindustan Times (India). TN serosurvey finds Covid antibodies in 23% population. India: Hindustan Times (India), 2021.                                                                                     |
| India, Tamil Nadu     | Malani A, Ramachandran S, Tandel V, Parasa R, Sudharshini S, Prakash V, Yogananth Y, Raju S, Selvavinayagam TS. SARS-CoV-2 Seroprevalence in Tamil Nadu in October-November 2020. Preprint. medRxiv. 2021. |
| India, Telangana      | *                                                                                                                                                                                                          |
| India, Telangana      | Mordani S. Seropositivity highest in Madhya Pradesh, lowest in Kerala, finds ICMR's national sero-survey. India Today [Internet]. 2021 Jul 28.                                                             |
| India, Tripura        | Deb D. 33.98% of Tripura has COVID-19 antibody in them, shows sero survey. The Indian Express [Internet]. 2020 Nov 12; North East India.                                                                   |
| India, Uttar Pradesh  | *                                                                                                                                                                                                          |
| India, Uttar Pradesh  | Mordani S. Seropositivity highest in Madhya Pradesh, lowest in Kerala, finds ICMR's national sero-survey. India Today [Internet]. 2021 Jul 28.                                                             |
| India, Uttarakhand    | Mordani S. Seropositivity highest in Madhya Pradesh, lowest in Kerala, finds ICMR's national sero-survey. India Today [Internet]. 2021 Jul 28.                                                             |
| India, West Bengal    | Kolkata: One in Four People Have Covid Antibodies. The Statesman [Internet]. 2020 Sept 10.                                                                                                                 |
| India, West Bengal    | Gautham, K. One in Three Exposed to Covid Virus, Reveals Second Chennai Sero Survey. The Times of India [Internet]. 2020 Oct 22.                                                                           |
| India, West Bengal    | *                                                                                                                                                                                                          |

|                                  |                                                                                                                                                                                                                                                                                                                                                                                              |
|----------------------------------|----------------------------------------------------------------------------------------------------------------------------------------------------------------------------------------------------------------------------------------------------------------------------------------------------------------------------------------------------------------------------------------------|
| India, West Bengal               | Mordani S. Seropositivity highest in Madhya Pradesh, lowest in Kerala, finds ICMR's national sero-survey. India Today [Internet]. 2021 Jul 28.                                                                                                                                                                                                                                               |
| Iran                             | Khalagi K, Gharibzadeh S, Khalili D, Mansournia MA, Mirab Samiee S, Aghamohamadi S, Mir-Mohammad-Ali Roodaki M, Hashemi SM, Tayeri K, Namdari Tabar H, Azadmanesh K, Tabrizi JS, Mohammad K, Hajipour F, Namaki S, Raeisi A, Ostovar A. Prevalence of COVID-19 in Iran: results of the first survey of the Iranian COVID-19 Serological Surveillance programme. Clin Microbiol Infect. 2021. |
| Ireland                          | Health Service Executive (HSE) (Ireland), University College Dublin. Ireland Study to Investigate COVID-19 Infection in People Living in Ireland (SCOPI) 2020. Dublin, Ireland: Health Protection Surveillance Centre (HPSC) (Ireland), 2020.                                                                                                                                                |
| Israel                           | Ministry of Health (Israel). Israel - Press Releases Results of the National Serological Survey for Novel Coronavirus. Jerusalem, Israel: Ministry of Health (Israel), 2020.                                                                                                                                                                                                                 |
| Israel                           | Reicher S, Ratzon R, Ben-Sahar S, Hermoni-Alon S, Mossinson D, Shenhar Y, Friger M, Lustig Y, Alroy-Preis S, Anis E, Sadetzki S, Kaliner E. Nationwide seroprevalence of antibodies against SARS-CoV-2 in Israel. Eur J Epidemiol. 2021.                                                                                                                                                     |
| Italy                            | Ministry of Health (Italy), National Institute of Statistics (Italy). Italy SARS-CoV-2 Seroprevalence Survey, First Results 2020.                                                                                                                                                                                                                                                            |
| Italy, Abruzzo                   | Ministry of Health (Italy), National Institute of Statistics (Italy). Italy SARS-CoV-2 Seroprevalence Survey, First Results 2020.                                                                                                                                                                                                                                                            |
| Italy, Basilicata                | Ministry of Health (Italy), National Institute of Statistics (Italy). Italy SARS-CoV-2 Seroprevalence Survey, First Results 2020.                                                                                                                                                                                                                                                            |
| Italy, Calabria                  | Ministry of Health (Italy), National Institute of Statistics (Italy). Italy SARS-CoV-2 Seroprevalence Survey, First Results 2020.                                                                                                                                                                                                                                                            |
| Italy, Campania                  | Ministry of Health (Italy), National Institute of Statistics (Italy). Italy SARS-CoV-2 Seroprevalence Survey, First Results 2020.                                                                                                                                                                                                                                                            |
| Italy, Emilia-Romagna            | Ministry of Health (Italy), National Institute of Statistics (Italy). Italy SARS-CoV-2 Seroprevalence Survey, First Results 2020.                                                                                                                                                                                                                                                            |
| Italy, Friuli-Venezia Giulia     | Ministry of Health (Italy), National Institute of Statistics (Italy). Italy SARS-CoV-2 Seroprevalence Survey, First Results 2020.                                                                                                                                                                                                                                                            |
| Italy, Lazio                     | Ministry of Health (Italy), National Institute of Statistics (Italy). Italy SARS-CoV-2 Seroprevalence Survey, First Results 2020.                                                                                                                                                                                                                                                            |
| Italy, Liguria                   | Ministry of Health (Italy), National Institute of Statistics (Italy). Italy SARS-CoV-2 Seroprevalence Survey, First Results 2020.                                                                                                                                                                                                                                                            |
| Italy, Lombardia                 | Ministry of Health (Italy), National Institute of Statistics (Italy). Italy SARS-CoV-2 Seroprevalence Survey, First Results 2020.                                                                                                                                                                                                                                                            |
| Italy, Marche                    | Ministry of Health (Italy), National Institute of Statistics (Italy). Italy SARS-CoV-2 Seroprevalence Survey, First Results 2020.                                                                                                                                                                                                                                                            |
| Italy, Molise                    | Ministry of Health (Italy), National Institute of Statistics (Italy). Italy SARS-CoV-2 Seroprevalence Survey, First Results 2020.                                                                                                                                                                                                                                                            |
| Italy, Piemonte                  | Ministry of Health (Italy), National Institute of Statistics (Italy). Italy SARS-CoV-2 Seroprevalence Survey, First Results 2020.                                                                                                                                                                                                                                                            |
| Italy, Prov. autonoma di Bolzano | Ministry of Health (Italy), National Institute of Statistics (Italy). Italy SARS-CoV-2 Seroprevalence Survey, First Results 2020.                                                                                                                                                                                                                                                            |
| Italy, Prov. autonoma di Trento  | Ministry of Health (Italy), National Institute of Statistics (Italy). Italy SARS-CoV-2 Seroprevalence Survey, First Results 2020.                                                                                                                                                                                                                                                            |
| Italy, Puglia                    | Ministry of Health (Italy), National Institute of Statistics (Italy). Italy SARS-CoV-2 Seroprevalence Survey, First Results 2020.                                                                                                                                                                                                                                                            |
| Italy, Sardegna                  | Ministry of Health (Italy), National Institute of Statistics (Italy). Italy SARS-CoV-2 Seroprevalence Survey, First Results 2020.                                                                                                                                                                                                                                                            |
| Italy, Sicilia                   | Ministry of Health (Italy), National Institute of Statistics (Italy). Italy SARS-CoV-2 Seroprevalence Survey, First Results 2020.                                                                                                                                                                                                                                                            |

|                      |                                                                                                                                                                                                                                                                                                                                                                                                                                                                                                                                             |
|----------------------|---------------------------------------------------------------------------------------------------------------------------------------------------------------------------------------------------------------------------------------------------------------------------------------------------------------------------------------------------------------------------------------------------------------------------------------------------------------------------------------------------------------------------------------------|
| Italy, Toscana       | Ministry of Health (Italy), National Institute of Statistics (Italy). Italy SARS-CoV-2 Seroprevalence Survey, First Results 2020.                                                                                                                                                                                                                                                                                                                                                                                                           |
| Italy, Umbria        | Ministry of Health (Italy), National Institute of Statistics (Italy). Italy SARS-CoV-2 Seroprevalence Survey, First Results 2020.                                                                                                                                                                                                                                                                                                                                                                                                           |
| Italy, Valle d'Aosta | Ministry of Health (Italy), National Institute of Statistics (Italy). Italy SARS-CoV-2 Seroprevalence Survey, First Results 2020.                                                                                                                                                                                                                                                                                                                                                                                                           |
| Italy, Veneto        | Ministry of Health (Italy), National Institute of Statistics (Italy). Italy SARS-CoV-2 Seroprevalence Survey, First Results 2020.                                                                                                                                                                                                                                                                                                                                                                                                           |
| Jordan               | Bellizzi S, Alsawalha L, Sheikh Ali S, Sharkas G, Muthu N, Ghazo M, Hayajneh W, Profili MC, Obeidat NM. A three-phase population based sero-epidemiological study: Assessing the trend in prevalence of SARS-CoV-2 during COVID-19 pandemic in Jordan. <i>One Health</i> . 2021; 13: 100292.                                                                                                                                                                                                                                                |
| Jordan               | Sughayer MA, Mansour A, Nuirat AA, Souan L, Ghanem M, Siag M, Alhassoon S. Dramatic Rise of Seroprevalence Rates of SARS-CoV-2 Antibodies among Healthy Blood Donors: The evolution of a Pandemic. Preprint. medRxiv. 2021.                                                                                                                                                                                                                                                                                                                 |
| Jordan               | Sughayer MA, Mansour A, Nuirat AA, Souan L, Abdel-Razeq R, Siag M. A second dramatic rise in seroprevalence rates of SARS-CoV-2 antibodies among adult healthy blood donors in Jordan; have we achieved herd immunity? Preprint. medRxiv. 2021.                                                                                                                                                                                                                                                                                             |
| Kazakhstan           | *                                                                                                                                                                                                                                                                                                                                                                                                                                                                                                                                           |
| Kenya                | Uyoga S, Adetifa IMO, Karanja HK, Nyagwange J, Tuju J, Wanjiku P, Aman R, Mwangangi M, Amoth P, Kasera K, Ng'ang'a W, Rombo C, Yegon CK, Kithi K, Odhiambo E, Rotich T, Orgut I, Kihara S, Otiende M, Bottomley C, Mupe ZN, Kagucia EW, Gallagher K, Etyang A, Voller S, Gitonga J, Mugo D, Agoti CN, Otieno E, Ndwiga L, Lambe T, Wright D, Barasa E, Tsofa B, Bejon P, Ochola-Oyier LI, Agweyu A, Scott AGJ, Warimwe GM. Seroprevalence of anti-SARS-CoV-2 IgG antibodies in Kenyan blood donors. Preprint. medRxiv. 2020.                |
| Kenya                | Adetifa IMO, Uyoga S, Gitonga JN, Mugo D, Otiende M, Nyagwange J, Karanja HK, Tuju J, Wanjiku P, Aman R, Mwangangi M, Amoth P, Kasera K, Nganga W, Rombo C, Yegon C, Kithi K, Odhiambo E, Rotich T, Orgut I, Kihara S, Bottomley C, Kagucia EW, Gallagher KE, Etyang A, Voller S, Lambe T, Wright D, Barasa E, Tsofa B, Bejon P, Ochola-Oyier LI, Agweyu A, Scott JAG, Warimwe GM. Temporal trends of SARS-CoV-2 seroprevalence in transfusion blood donors during the first wave of the COVID-19 epidemic in Kenya. medRxiv. 2021.         |
| Kenya                | Uyoga S, Adetifa IMO, Otiende M, Gitonga JN, Mugo D, Nyagwange J, Karanja HK, Tuju J, Makale J, Aman R, Mwangangi M, Amoth P, Kasera K, Nganga W, Kilonzo N, Chege E, Yegon C, Odhiambo E, Rotich T, Orgut I, Kihara S, Bottomley C, Kagucia EW, Gallagher KE, Etyang A, Voller S, Lambe T, Wright D, Barasa E, Tsofa B, Mwangangi J, Bejon P, Ochola-Oyier LI, Warimwe GM, Agweyu A, Scott JAG. Prevalence of SARS-CoV-2 Antibodies from a one-year National Serosurveillance of Kenyan Blood Transfusion Donors. Preprint. medRxiv. 2021. |
| Kenya                | Ngere IA, Dawa J, Hunsperger E, Otieno N, Masika M, Amoth P, Makayotto L, Nasimiyu C, Gunn BM, Nyawanda B, Oluga O, Ngunu C, Mirieri H, Gachohi J, Marwanga D, Munywoki P, Odhiambo D, Alando MD, Breiman R, Anzala O, Njenga MK, Bulterys M, Herman-Roloff A, Osoro E. High Seroprevalence of SARS-CoV-2 Eight Months After Introduction in Nairobi, Kenya. Preprint. Lancet. 2021.                                                                                                                                                        |
| Luxembourg           | Snoeck CJ, Vaillant M, Abdelrahman T, Satagopam VP, Turner JD, Beaumont K, Gomes CPC, Fritz JV, Schröder VE, Kaysen A, Pavelka L, Stute L, Meyers GR, Pauly L, Hansen M, Pauly C, Aguayo GA, Perquin M, Hanff AM, Ghosh S, Gantenbein M, Huiart L, Ollert M, Krüger R. Prevalence of SARS-CoV-2 infection in the Luxembourgish population: the CON-VINCE study. Preprint. medRxiv. 2020.                                                                                                                                                    |
| Mexico               | Health Secretary, National Institute of Public Health (Mexico). Preliminary results of the National Health and Nutrition Survey COVID-19. Communiqué 255, 2020 Dec 16.                                                                                                                                                                                                                                                                                                                                                                      |
| Mexico               | Muñoz-Medina JE, Grajales-Muñiz C, Salas-Lais AG, Fernandes-Matano L, López-Macías C, Monroy-Muñoz IE, Santos Coy-Arechavaleta A, Palomec-Nava ID, Duque-Molina C, Madera-Sandoval RL, Rivero-Arredondo V, González-Ibarra J, Alvarado-Yaah JE, Rojas-Mendoza T, Santacruz-Tinoco CE, González-Bonilla CR, Borja-Aburto VH. SARS-CoV-2 IgG Antibodies                                                                                                                                                                                       |

|                             |                                                                                                                                                                                                                        |
|-----------------------------|------------------------------------------------------------------------------------------------------------------------------------------------------------------------------------------------------------------------|
|                             | Seroprevalence and Sera Neutralizing Activity in MEXICO: A National Cross-Sectional Study during 2020. <i>Microorganisms</i> . 2021; 9(4).                                                                             |
| Mexico, Aguascalientes      | Government of Mexico, National Institute of Public Health (Mexico). Mexico National Health and Nutrition Survey (ENSANUT) about COVID-19 2020. Cuernavaca, Mexico: National Institute of Public Health (Mexico), 2020. |
| Mexico, Baja California     | Government of Mexico, National Institute of Public Health (Mexico). Mexico National Health and Nutrition Survey (ENSANUT) about COVID-19 2020. Cuernavaca, Mexico: National Institute of Public Health (Mexico), 2020. |
| Mexico, Baja California Sur | Government of Mexico, National Institute of Public Health (Mexico). Mexico National Health and Nutrition Survey (ENSANUT) about COVID-19 2020. Cuernavaca, Mexico: National Institute of Public Health (Mexico), 2020. |
| Mexico, Campeche            | Government of Mexico, National Institute of Public Health (Mexico). Mexico National Health and Nutrition Survey (ENSANUT) about COVID-19 2020. Cuernavaca, Mexico: National Institute of Public Health (Mexico), 2020. |
| Mexico, Chiapas             | Government of Mexico, National Institute of Public Health (Mexico). Mexico National Health and Nutrition Survey (ENSANUT) about COVID-19 2020. Cuernavaca, Mexico: National Institute of Public Health (Mexico), 2020. |
| Mexico, Chihuahua           | Government of Mexico, National Institute of Public Health (Mexico). Mexico National Health and Nutrition Survey (ENSANUT) about COVID-19 2020. Cuernavaca, Mexico: National Institute of Public Health (Mexico), 2020. |
| Mexico, Coahuila            | Government of Mexico, National Institute of Public Health (Mexico). Mexico National Health and Nutrition Survey (ENSANUT) about COVID-19 2020. Cuernavaca, Mexico: National Institute of Public Health (Mexico), 2020. |
| Mexico, Colima              | Government of Mexico, National Institute of Public Health (Mexico). Mexico National Health and Nutrition Survey (ENSANUT) about COVID-19 2020. Cuernavaca, Mexico: National Institute of Public Health (Mexico), 2020. |
| Mexico, Durango             | Government of Mexico, National Institute of Public Health (Mexico). Mexico National Health and Nutrition Survey (ENSANUT) about COVID-19 2020. Cuernavaca, Mexico: National Institute of Public Health (Mexico), 2020. |
| Mexico, Guanajuato          | Government of Mexico, National Institute of Public Health (Mexico). Mexico National Health and Nutrition Survey (ENSANUT) about COVID-19 2020. Cuernavaca, Mexico: National Institute of Public Health (Mexico), 2020. |
| Mexico, Guerrero            | Government of Mexico, National Institute of Public Health (Mexico). Mexico National Health and Nutrition Survey (ENSANUT) about COVID-19 2020. Cuernavaca, Mexico: National Institute of Public Health (Mexico), 2020. |
| Mexico, Hidalgo             | Government of Mexico, National Institute of Public Health (Mexico). Mexico National Health and Nutrition Survey (ENSANUT) about COVID-19 2020. Cuernavaca, Mexico: National Institute of Public Health (Mexico), 2020. |
| Mexico, Jalisco             | Government of Mexico, National Institute of Public Health (Mexico). Mexico National Health and Nutrition Survey (ENSANUT) about COVID-19 2020. Cuernavaca, Mexico: National Institute of Public Health (Mexico), 2020. |
| Mexico, México              | Government of Mexico, National Institute of Public Health (Mexico). Mexico National Health and Nutrition Survey (ENSANUT) about COVID-19 2020. Cuernavaca, Mexico: National Institute of Public Health (Mexico), 2020. |
| Mexico, Mexico City         | Government of Mexico, National Institute of Public Health (Mexico). Mexico National Health and Nutrition Survey (ENSANUT) about COVID-19 2020. Cuernavaca, Mexico: National Institute of Public Health (Mexico), 2020. |
| Mexico, Michoacán de Ocampo | Government of Mexico, National Institute of Public Health (Mexico). Mexico National Health and Nutrition Survey (ENSANUT) about COVID-19 2020. Cuernavaca, Mexico: National Institute of Public Health (Mexico), 2020. |
| Mexico, Morelos             | Government of Mexico, National Institute of Public Health (Mexico). Mexico National Health and Nutrition Survey (ENSANUT) about COVID-19 2020. Cuernavaca, Mexico: National Institute of Public Health (Mexico), 2020. |



|                                         |                                                                                                                                                                                                                        |
|-----------------------------------------|------------------------------------------------------------------------------------------------------------------------------------------------------------------------------------------------------------------------|
| Mexico, Nayarit                         | Government of Mexico, National Institute of Public Health (Mexico). Mexico National Health and Nutrition Survey (ENSANUT) about COVID-19 2020. Cuernavaca, Mexico: National Institute of Public Health (Mexico), 2020. |
| Mexico, Nuevo León                      | Government of Mexico, National Institute of Public Health (Mexico). Mexico National Health and Nutrition Survey (ENSANUT) about COVID-19 2020. Cuernavaca, Mexico: National Institute of Public Health (Mexico), 2020. |
| Mexico, Oaxaca                          | Government of Mexico, National Institute of Public Health (Mexico). Mexico National Health and Nutrition Survey (ENSANUT) about COVID-19 2020. Cuernavaca, Mexico: National Institute of Public Health (Mexico), 2020. |
| Mexico, Puebla                          | Government of Mexico, National Institute of Public Health (Mexico). Mexico National Health and Nutrition Survey (ENSANUT) about COVID-19 2020. Cuernavaca, Mexico: National Institute of Public Health (Mexico), 2020. |
| Mexico, Querétaro                       | Government of Mexico, National Institute of Public Health (Mexico). Mexico National Health and Nutrition Survey (ENSANUT) about COVID-19 2020. Cuernavaca, Mexico: National Institute of Public Health (Mexico), 2020. |
| Mexico, Quintana Roo                    | Government of Mexico, National Institute of Public Health (Mexico). Mexico National Health and Nutrition Survey (ENSANUT) about COVID-19 2020. Cuernavaca, Mexico: National Institute of Public Health (Mexico), 2020. |
| Mexico, San Luis Potosí                 | Government of Mexico, National Institute of Public Health (Mexico). Mexico National Health and Nutrition Survey (ENSANUT) about COVID-19 2020. Cuernavaca, Mexico: National Institute of Public Health (Mexico), 2020. |
| Mexico, Sinaloa                         | Government of Mexico, National Institute of Public Health (Mexico). Mexico National Health and Nutrition Survey (ENSANUT) about COVID-19 2020. Cuernavaca, Mexico: National Institute of Public Health (Mexico), 2020. |
| Mexico, Sonora                          | Government of Mexico, National Institute of Public Health (Mexico). Mexico National Health and Nutrition Survey (ENSANUT) about COVID-19 2020. Cuernavaca, Mexico: National Institute of Public Health (Mexico), 2020. |
| Mexico, Tabasco                         | Government of Mexico, National Institute of Public Health (Mexico). Mexico National Health and Nutrition Survey (ENSANUT) about COVID-19 2020. Cuernavaca, Mexico: National Institute of Public Health (Mexico), 2020. |
| Mexico, Tamaulipas                      | Government of Mexico, National Institute of Public Health (Mexico). Mexico National Health and Nutrition Survey (ENSANUT) about COVID-19 2020. Cuernavaca, Mexico: National Institute of Public Health (Mexico), 2020. |
| Mexico, Tlaxcala                        | Government of Mexico, National Institute of Public Health (Mexico). Mexico National Health and Nutrition Survey (ENSANUT) about COVID-19 2020. Cuernavaca, Mexico: National Institute of Public Health (Mexico), 2020. |
| Mexico, Veracruz de Ignacio de la Llave | Government of Mexico, National Institute of Public Health (Mexico). Mexico National Health and Nutrition Survey (ENSANUT) about COVID-19 2020. Cuernavaca, Mexico: National Institute of Public Health (Mexico), 2020. |
| Mexico, Yucatán                         | Government of Mexico, National Institute of Public Health (Mexico). Mexico National Health and Nutrition Survey (ENSANUT) about COVID-19 2020. Cuernavaca, Mexico: National Institute of Public Health (Mexico), 2020. |
| Mexico, Zacatecas                       | Government of Mexico, National Institute of Public Health (Mexico). Mexico National Health and Nutrition Survey (ENSANUT) about COVID-19 2020. Cuernavaca, Mexico: National Institute of Public Health (Mexico), 2020. |
| Monaco                                  | La Gazette de Monaco. Covid 19: around 35 000 people have been tested. La Gazette de Monaco [Internet]. 2020 Jun 15; Politics.                                                                                         |
| Mozambique                              | Ministry of Health (Mozambique). Serum-epidemiological Survey of SARS-CoV-2, City of Pemba (InCOVID 2020) - Preliminary Results. Maputo, Mozambique: Ministry of Health (Mozambique).                                  |
| Mozambique                              | Ministry of Health (Mozambique). Serum-epidemiological Survey of SARS-CoV-2, City of Quelimane (InCOVID 2020) - Preliminary Results. Maputo, Mozambique: Ministry of Health (Mozambique).                              |

|             |                                                                                                                                                                                                                                                                                                                                                                                             |
|-------------|---------------------------------------------------------------------------------------------------------------------------------------------------------------------------------------------------------------------------------------------------------------------------------------------------------------------------------------------------------------------------------------------|
| Mozambique  | Ministry of Health (Mozambique). Serum-epidemiological Survey of SARS-CoV-2, City of Maputo (InCOVID 2020) - Preliminary Results. Maputo, Mozambique: Ministry of Health (Mozambique).                                                                                                                                                                                                      |
| Mozambique  | Ministry of Health (Mozambique). Serum-epidemiological Survey of SARS-CoV-2, City of Beira (InCOVID 2020) - Preliminary Results. Maputo, Mozambique: Ministry of Health (Mozambique).                                                                                                                                                                                                       |
| Mozambique  | Ministry of Health (Mozambique). Serum-epidemiological Survey of SARS-CoV-2, City of Lichinga (InCOVID 2020) - Preliminary Results. Maputo, Mozambique: Ministry of Health (Mozambique).                                                                                                                                                                                                    |
| Mozambique  | Ministry of Health (Mozambique). Serum-epidemiological Survey of SARS-CoV-2, City of Tete (InCOVID 2020) - Preliminary Results. Maputo, Mozambique: Ministry of Health (Mozambique).                                                                                                                                                                                                        |
| Mozambique  | Ministry of Health (Mozambique). Serum-epidemiological Survey of SARS-CoV-2, Cities of Xai-Xai and Chókwè (InCOVID 2020) - Preliminary Results. Maputo, Mozambique: Ministry of Health (Mozambique).                                                                                                                                                                                        |
| Mozambique  | Ministry of Health (Mozambique). Serum-epidemiological Survey of SARS-CoV-2, City of Chimoio (InCOVID 2020) - Preliminary Results . Maputo, Mozambique: Ministry of Health (Mozambique).                                                                                                                                                                                                    |
| Nepal       | Ministry of Health and Population (Nepal), National Public Health Laboratory (Nepal), World Health Organization (WHO), World Health Organization Regional Office for South-East Asia (SEARO). Nepal National Sero-Prevalence Survey for COVID-19 October 2020.                                                                                                                              |
| Netherlands | Vos ERA, den Hartog G, Schepp RM, Kaaijk P, van Vliet J, Helm K, Smits G, Wijmenga-Monsuur A, Verberk JDM, van Boven M, van Binnendijk RS, de Melker HE, Mollema L, van der Klis FRM. Nationwide seroprevalence of SARS-CoV-2 and identification of risk factors in the general population of the Netherlands during the first epidemic wave. <i>J Epidemiol Community Health</i> . 2020.   |
| Netherlands | Vos ERA, van Boven M, den Hartog G, Backer JA, Klinkenberg D, van Hagen CCE, Boshuizen H, van Binnendijk RS, Mollema L, van der Klis FRM, de Melker HE. Associations between measures of social distancing and SARS-CoV-2 seropositivity: a nationwide population-based study in the Netherlands. <i>Clin Infect Dis</i> . 2021.                                                            |
| Netherlands | Slot E, Hogema BM, Reusken CBEM, Reimerink JH, Molier M, Karregat JHM, IJst J, Novotný VMJ, van Lier RAW, Zaaijer HL. Low SARS-CoV-2 seroprevalence in blood donors in the early COVID-19 epidemic in the Netherlands. <i>Nat Commun</i> . 2020; 11(1): 5744.                                                                                                                               |
| Netherlands | Sanquin (Netherlands). Netherlands - Coronavirus antibodies in an average of 18.6% of the donors. Sanquin (Netherlands) [Internet]. 17 Mar 2021; News.                                                                                                                                                                                                                                      |
| New Zealand | Carlton LH, Chen T, Whitcombe AL, McGregor R, Scheurich G, Sheen CR, Dickson JM, Bullen C, Chiang A, Exeter DJ, Paynter J, Baker MG, Charlewood R, Moreland NJ. Charting Elimination in the Pandemic: A SARS-CoV-2 Serosurvey of Blood Donors in New Zealand. Preprint. medRxiv. 2021.                                                                                                      |
| Nigeria     | Nigeria Centre for Disease Control. Federal Ministry of Health Implements Massive Distribution of Personal Protective Equipment to Primary Healthcare Centres in Nigeria. Nigeria Centre for Disease Control [Internet]. 28 May 2021; News.                                                                                                                                                 |
| Norway      | Norwegian Institute of Public Health. Seroprevalence of SARS-CoV-2 in the Norwegian population measured in residual sera collected in April/May 2020 and August 2019. Oslo, Norway: Norwegian Institute of Public Health, 2020.                                                                                                                                                             |
| Norway      | Tunheim G., Kran, AB., Rø, G., Hungnes O., Lund-Johansen, F., Tran, T., Andersen JT., Vaage, JT. "Seroprevalence of SARS-CoV-2 in the Norwegian population measured in residual sera collected in late summer 2020". [Seroprevalens av SARS-CoV-2 i den norske befolkningen, målt i restsera samlet inn på sensommeren 2020] Report 2020. Oslo: Norwegian Institute of Public Health, 2020. |
| Norway      | Anda EE, Braaten T, Borch KB, Nøst TH, Chen SLF, Lukic M, Lund E, Forland F, Leon D, Winje BA, Kran A-MB, Kalager M, Johansen FL, Sandanger TM. Seroprevalence of antibodies against SARS-CoV-2 virus in the adult Norwegian population, winter 2020/2021: pre-vaccination period. Preprint. medRxiv. 2021.                                                                                 |

|                              |                                                                                                                                                                                                                                                                                                                                                                                                                                                                                                                                                                                                                                                                                                  |
|------------------------------|--------------------------------------------------------------------------------------------------------------------------------------------------------------------------------------------------------------------------------------------------------------------------------------------------------------------------------------------------------------------------------------------------------------------------------------------------------------------------------------------------------------------------------------------------------------------------------------------------------------------------------------------------------------------------------------------------|
| Oman                         | Ministry of Health (Oman). Oman COVID-19 National Serological Survey Phase 1 2020.                                                                                                                                                                                                                                                                                                                                                                                                                                                                                                                                                                                                               |
| Pakistan, Khyber Pakhtunkhwa | Haq M, Rehman A, Ahmad J, Zafar U, Ahmed S, Khan MA, Naveed A, Rajab H, Muhammad F, Naushad W, Aman M, Rehman HU, Ahmad S, Anwar S, Haq NU. SARS-CoV-2: big seroprevalence data from Pakistan-is herd immunity at hand?. <i>Infection</i> . 2021.                                                                                                                                                                                                                                                                                                                                                                                                                                                |
| Pakistan, Punjab             | Haq M, Rehman A, Ahmad J, Zafar U, Ahmed S, Khan MA, Naveed A, Rajab H, Muhammad F, Naushad W, Aman M, Rehman HU, Ahmad S, Anwar S, Haq NU. SARS-CoV-2: big seroprevalence data from Pakistan-is herd immunity at hand?. <i>Infection</i> . 2021.                                                                                                                                                                                                                                                                                                                                                                                                                                                |
| Pakistan, Sindh              | Haq M, Rehman A, Ahmad J, Zafar U, Ahmed S, Khan MA, Naveed A, Rajab H, Muhammad F, Naushad W, Aman M, Rehman HU, Ahmad S, Anwar S, Haq NU. SARS-CoV-2: big seroprevalence data from Pakistan-is herd immunity at hand?. <i>Infection</i> . 2021.                                                                                                                                                                                                                                                                                                                                                                                                                                                |
| Peru                         | Huamaní C, Velásquez L, Montes S, Mayanga-Herrera A, Bernabé-Ortiz A. Population-based seroprevalence of SARS-CoV-2 antibodies in a high-altitude setting in Peru. Preprint.medRxiv. 2021.                                                                                                                                                                                                                                                                                                                                                                                                                                                                                                       |
| Poland                       | Zejda JE, Brożek GM, Kowalska M, Barański K, Kaleta-Pilarska A, Nowakowski A, Xia Y, Buszman P. Seroprevalence of Anti-SARS-CoV-2 Antibodies in a Random Sample of Inhabitants of the Katowice Region, Poland. <i>Int J Environ Res Public Health</i> . 2021; 18(6).                                                                                                                                                                                                                                                                                                                                                                                                                             |
| Portugal                     | Ministry of Health (Portugal). Portugal National Serological Survey COVID-19 Preliminary results 2020. Lisbon, Portugal: Ministry of Health (Portugal), 2020.                                                                                                                                                                                                                                                                                                                                                                                                                                                                                                                                    |
| Portugal                     | Ministry of Health (Portugal). Portugal National Serological Survey COVID-19 (2nd phase) 2021. Lisbon, Portugal: Ministry of Health (Portugal), 2020.                                                                                                                                                                                                                                                                                                                                                                                                                                                                                                                                            |
| Portugal                     | Castro L, Gomes A, et al. Longitudinal SARS-CoV-2 seroprevalence in Portugal and antibody maintenance 12 months after the start of the COVID-19 pandemic. Preprint. <i>Res Sq</i> . 2021.                                                                                                                                                                                                                                                                                                                                                                                                                                                                                                        |
| Puerto Rico                  | Puerto Rico Public Health Trust (PRPHT). Puerto Rico Community Assessment for Response to Public Health Emergencies (CASPER) 2020.                                                                                                                                                                                                                                                                                                                                                                                                                                                                                                                                                               |
| Puerto Rico                  | Jones JM, Stone M, Sulaeman H, Fink RV, Dave H, Levy ME, Di Germanio C, Green V, Notari E, Saa P, Biggerstaff BJ, Strauss D, Kessler D, Vassallo R, Reik R, Rossmann S, Destree M, Nguyen KA, Sayers M, Lough C, Bougie DW, Ritter M, Latoni G, Weales B, Sime S, Gorlin J, Brown NE, Gould CV, Berney K, Benoit TJ, Miller MJ, Freeman D, Kartik D, Fry AM, Azziz-Baumgartner E, Hall AJ, MacNeil A, Gundlapalli AV, Basavaraju SV, Gerber SI, Patton ME, Custer B, Williamson P, Simmons G, Thornburg NJ, Kleinman S, Stramer SL, Opsomer J, Busch MP. Estimated US Infection- and Vaccine-Induced SARS-CoV-2 Seroprevalence Based on Blood Donations, July 2020-May 2021. <i>JAMA</i> . 2021. |
| Puerto Rico                  | Centers for Disease Control and Prevention (CDC). CDC COVID Data Tracker Commercial Laboratory Seroprevalence Survey Data. Atlanta, United States of America: Centers for Disease Control and Prevention (CDC).                                                                                                                                                                                                                                                                                                                                                                                                                                                                                  |
| Qatar                        | Abu-Raddad LJ, Chemaitelly H, Ayoub HH, Al Kanaani Z, Al Khal A, Al Kuwari E, Butt AA, Coyle P, Jeremijenko A, Kaleeckal AH, Latif AN, Owen RC, Rahim HFA, Al Abdulla SA, Al Kuwari MG, Kandy MC, Saeb H, Ahmed SNN, Al Romaihi HE, Bansal D, Dalton L, Al-Thani MH, Bertollini R. Characterizing the Qatar advanced-phase SARS-CoV-2 epidemic. <i>Sci Rep</i> . 2021; 11(1): 6233.                                                                                                                                                                                                                                                                                                              |
| Russia                       | Popova AY, Andreeva EE, Babura EA, Balakhonov SV, Bashketova NS, Bulanov MV, Valeullina NN, Goryaev DV, Detkovskaya NN, Ezhlova EB, Zaitseva NN, Istorik OA, Kovalchuk IV, Kozlovskikh DN, Kombarova SV, Kurganova OP, Kutyrev VV, Lomovtsev AE, Lukicheva LA, Lyalina LV, Melnikova AA, Mikailova OM, Noskov AK, Noskova LN, Oglezneva EE, Osmolovskay TP, Patyashina MA, Penkovskaya NA, SamoiloVA LV, Smirnov VS, Stepanova TF, Trotsenko OE, Totolyan AA. [Features of developing SARS-CoV-2 nucleocapsid protein population-based seroprevalence during the first wave of the COVID-19 epidemic in the Russian Federation]. <i>Infektsiia Immun</i> . 2021; 11(2): 297-323.                 |
| Russia                       | Interfax. Popova declared immunity to coronavirus in 14% of those tested. Interfax [Internet]. 2020 Jun 10.                                                                                                                                                                                                                                                                                                                                                                                                                                                                                                                                                                                      |
| Sierra Leone                 | Barrie MB, Lakoh S, Kelly JD, Kanu JS, Squire J, Koroma Z, Bah S, Sankoh O, Brima A, Ansumana R, Goldberg SA, Chitre S, Osuagwu C, Maeda J, Barekye B, Numbere T-W, Abdulaziz M, Mounts A, Blanton C, Singh T, Samai M, Vandi MA, Richardson ET. SARS-                                                                                                                                                                                                                                                                                                                                                                                                                                           |

|                            |                                                                                                                                                                                                                                                                                                                                                                                                            |
|----------------------------|------------------------------------------------------------------------------------------------------------------------------------------------------------------------------------------------------------------------------------------------------------------------------------------------------------------------------------------------------------------------------------------------------------|
|                            | CoV-2 antibody prevalence in Sierra Leone, March 2021: a cross-sectional, nationally representative, age-stratified serosurvey. Preprint. medRxiv. 2021.                                                                                                                                                                                                                                                   |
| Slovenia                   | Poljak M, Oštrbenk Valenčak A, Štrumbelj E, Maver Vodičar P, Vehovar V, Resman Rus K, Korva M, Knap N, Seme K, Petrovec M, Župan B, Demšar J, Kurdija S, Avšič Županc T. Seroprevalence of severe acute respiratory syndrome coronavirus 2 in Slovenia: results of two rounds of a nationwide population study on a probability-based sample, challenges and lessons learned. Clin Microbiol Infect. 2021. |
| South Africa               | Sykes W, Mhlanga L, Swanevelder R, Glatt TN, Grebe E, Coleman C, Pieterse N, Cable R, Welte A, van den Berg K, Vermeulen M. Prevalence of anti-SARS-CoV-2 antibodies among blood donors in Northern Cape, KwaZulu-Natal, Eastern Cape, and Free State provinces of South Africa in January 2021. Preprint. Res Sq. 2021.                                                                                   |
| South Korea                | Lee K, Jo S, Lee J. Seroprevalence of SARS-CoV-2 antibodies in South Korea. J Korean Stat Soc. 2021; 1-14.                                                                                                                                                                                                                                                                                                 |
| South Korea                | Nah EH, Cho S, Park H, Hwang I, Cho HI. Nationwide seroprevalence of antibodies to SARS-CoV-2 in asymptomatic population in South Korea: a cross-sectional study. BMJ Open. 2021; 11(4): e049837.                                                                                                                                                                                                          |
| Spain                      | Government of Spain, Institute of Health Carlos III (Spain). Spain - National Study of Seroepidemiology of Infection by Sars-Cov-2.                                                                                                                                                                                                                                                                        |
| Spain, Andalusia           | Government of Spain, Institute of Health Carlos III (Spain). Spain - National Study of Seroepidemiology of Infection by Sars-Cov-2.                                                                                                                                                                                                                                                                        |
| Spain, Aragon              | Government of Spain, Institute of Health Carlos III (Spain). Spain - National Study of Seroepidemiology of Infection by Sars-Cov-2.                                                                                                                                                                                                                                                                        |
| Spain, Asturias            | Government of Spain, Institute of Health Carlos III (Spain). Spain - National Study of Seroepidemiology of Infection by Sars-Cov-2.                                                                                                                                                                                                                                                                        |
| Spain, Balearic Islands    | Government of Spain, Institute of Health Carlos III (Spain). Spain - National Study of Seroepidemiology of Infection by Sars-Cov-2.                                                                                                                                                                                                                                                                        |
| Spain, Basque Country      | Government of Spain, Institute of Health Carlos III (Spain). Spain - National Study of Seroepidemiology of Infection by Sars-Cov-2.                                                                                                                                                                                                                                                                        |
| Spain, Canary Islands      | Government of Spain, Institute of Health Carlos III (Spain). Spain - National Study of Seroepidemiology of Infection by Sars-Cov-2.                                                                                                                                                                                                                                                                        |
| Spain, Cantabria           | Iruzubieta P, Fernández-Lanas T, Rasines L, Cayon L, Álvarez-Cancelo A, Santos-Laso A, García-Blanco A, Curiel-Olmo S, Cabezas J, Wallmann R, Fábrega E, Martínez-Taboada VM, Hernández JL, López-Hoyos M, Lazarus JV, Crespo J. Feasibility of large-scale population testing for SARS-CoV-2 detection by self-testing at home. Sci Rep. 2021; 11(1): 9819.                                               |
| Spain, Cantabria           | Government of Spain, Institute of Health Carlos III (Spain). Spain - National Study of Seroepidemiology of Infection by Sars-Cov-2.                                                                                                                                                                                                                                                                        |
| Spain, Castile and León    | Government of Spain, Institute of Health Carlos III (Spain). Spain - National Study of Seroepidemiology of Infection by Sars-Cov-2.                                                                                                                                                                                                                                                                        |
| Spain, Castilla-La Mancha  | Government of Spain, Institute of Health Carlos III (Spain). Spain - National Study of Seroepidemiology of Infection by Sars-Cov-2.                                                                                                                                                                                                                                                                        |
| Spain, Catalonia           | Government of Spain, Institute of Health Carlos III (Spain). Spain - National Study of Seroepidemiology of Infection by Sars-Cov-2.                                                                                                                                                                                                                                                                        |
| Spain, Ceuta               | Government of Spain, Institute of Health Carlos III (Spain). Spain - National Study of Seroepidemiology of Infection by Sars-Cov-2.                                                                                                                                                                                                                                                                        |
| Spain, Community of Madrid | Government of Spain, Institute of Health Carlos III (Spain). Spain - National Study of Seroepidemiology of Infection by Sars-Cov-2.                                                                                                                                                                                                                                                                        |
| Spain, Extremadura         | Government of Spain, Institute of Health Carlos III (Spain). Spain - National Study of Seroepidemiology of Infection by Sars-Cov-2.                                                                                                                                                                                                                                                                        |
| Spain, Galicia             | Government of Spain, Institute of Health Carlos III (Spain). Spain - National Study of Seroepidemiology of Infection by Sars-Cov-2.                                                                                                                                                                                                                                                                        |

|                            |                                                                                                                                                                                                                                                                                                                                                                                                                                                                                                                                                                                                             |
|----------------------------|-------------------------------------------------------------------------------------------------------------------------------------------------------------------------------------------------------------------------------------------------------------------------------------------------------------------------------------------------------------------------------------------------------------------------------------------------------------------------------------------------------------------------------------------------------------------------------------------------------------|
| Spain, La Rioja            | Government of Spain, Institute of Health Carlos III (Spain). Spain - National Study of Sero-epidemiology of Infection by Sars-Cov-2.                                                                                                                                                                                                                                                                                                                                                                                                                                                                        |
| Spain, Melilla             | Government of Spain, Institute of Health Carlos III (Spain). Spain - National Study of Sero-epidemiology of Infection by Sars-Cov-2.                                                                                                                                                                                                                                                                                                                                                                                                                                                                        |
| Spain, Murcia              | Government of Spain, Institute of Health Carlos III (Spain). Spain - National Study of Sero-epidemiology of Infection by Sars-Cov-2.                                                                                                                                                                                                                                                                                                                                                                                                                                                                        |
| Spain, Navarre             | Government of Spain, Institute of Health Carlos III (Spain). Spain - National Study of Sero-epidemiology of Infection by Sars-Cov-2.                                                                                                                                                                                                                                                                                                                                                                                                                                                                        |
| Spain, Valencian Community | Government of Spain, Institute of Health Carlos III (Spain). Spain - National Study of Sero-epidemiology of Infection by Sars-Cov-2.                                                                                                                                                                                                                                                                                                                                                                                                                                                                        |
| Sweden                     | Public Health Agency of Sweden. Presence of antibodies to SARS-CoV-2 in Sweden, 26 April - 9 May 2021. Östersund, Sweden: Public Health Agency of Sweden.                                                                                                                                                                                                                                                                                                                                                                                                                                                   |
| Sweden                     | Public Health Agency of Sweden. Detection of Antibodies After Review of Covid-19 in Blood Donors (Sub-report 2). Östersund, Sweden: Public Health Agency of Sweden.                                                                                                                                                                                                                                                                                                                                                                                                                                         |
| UK, England                | Office for National Statistics (ONS) (United Kingdom). England - Coronavirus (COVID-19) Infection Survey: Antibody Data, January 2021. Newport, United Kingdom: Office for National Statistics (ONS) (United Kingdom), 2021.                                                                                                                                                                                                                                                                                                                                                                                |
| UK, England                | National Health Service (United Kingdom), Public Health England. United Kingdom - England Weekly National COVID-19 Surveillance Report. London, United Kingdom: Government of the United Kingdom.                                                                                                                                                                                                                                                                                                                                                                                                           |
| UK, England                | Ward H, Atchison C, Whitaker M, Ainslie KEC, Elliott J, Okell L, Redd R, Ashby D, Donnelly CA, Barclay W, Darzi A, Cooke G, Riley S, Elliott P. SARS-CoV-2 antibody prevalence in England following the first peak of the pandemic. <i>Nat Commun.</i> 2021; 12(905).                                                                                                                                                                                                                                                                                                                                       |
| UK, England                | Ward H, Cooke G, Atchison C, Whitaker M, Elliott J, Moshe M, Brown JC, Flower B, Daunt A, Ainslie K, Ashby D, Donnelly C, Riley S, Darzi A, Barclay W, Elliott P, for the React study team. Declining prevalence of antibody positivity to SARS-CoV-2: a community study of 365,000 adults. Preprint. medRxiv. 2020.                                                                                                                                                                                                                                                                                        |
| UK, England                | Office for National Statistics (ONS) (United Kingdom). United Kingdom Coronavirus (COVID-19) Infection Survey Pilot 2020. Newport, United Kingdom: Office for National Statistics (ONS) (United Kingdom), 2020.                                                                                                                                                                                                                                                                                                                                                                                             |
| UK, England                | Office for National Statistics (ONS) (United Kingdom). United Kingdom Coronavirus (COVID-19) Infection Survey. Newport, United Kingdom: Office for National Statistics (ONS) (United Kingdom), 2020.                                                                                                                                                                                                                                                                                                                                                                                                        |
| UK, Northern Ireland       | Office for National Statistics (ONS) (United Kingdom). England - Coronavirus (COVID-19) Infection Survey: Antibody Data, January 2021. Newport, United Kingdom: Office for National Statistics (ONS) (United Kingdom), 2021.                                                                                                                                                                                                                                                                                                                                                                                |
| UK, Scotland               | Office for National Statistics (ONS) (United Kingdom). England - Coronavirus (COVID-19) Infection Survey: Antibody Data, January 2021. Newport, United Kingdom: Office for National Statistics (ONS) (United Kingdom), 2021.                                                                                                                                                                                                                                                                                                                                                                                |
| UK, Scotland               | Public Health Scotland, Scottish National Blood Transfusion Service (SNBTS), The Centre for Virus Research (CVR) at the University of Glasgow. Scotland Enhanced Surveillance of Covid-19 Dashboard. Edinburgh, Scotland: Public Health Scotland.                                                                                                                                                                                                                                                                                                                                                           |
| UK, Scotland               | Thompson CP, Grayson N, Paton R, Bolton JS, Lourenço J, Penman B, Lee LN, Odon V, Mongkolsapaya J, Chinnakannan S, Dejnirattisai W, Edmans M, Fyfe A, Imlach C, Kooblall K, Lim N, Liu C, Lopez-Camacho C, McInally CA, Ramamurthy N, Ratcliff J, Supasa P, Wang B, Mentzer AJ, Turner M, Sampson O, Semple C, Baillie JK, ISARIC4C Investigators, Harvala H, Sreaton G, Temperton N, Klenerman P, Jarvis L, Gupta S, Simmonds P. Detection of neutralising antibodies to SARS coronavirus 2 to determine population exposure in Scottish blood donors between March and May 2020. Preprint. medRxiv. 2020. |
| UK, Wales                  | Office for National Statistics (ONS) (United Kingdom). England - Coronavirus (COVID-19) Infection Survey: Antibody Data, January 2021. Newport, United Kingdom: Office for National Statistics (ONS) (United Kingdom), 2021.                                                                                                                                                                                                                                                                                                                                                                                |

|               |                                                                                                                                                                                                                                                                                                                                                                                                                                                                                                                                                                                                                                                                                          |
|---------------|------------------------------------------------------------------------------------------------------------------------------------------------------------------------------------------------------------------------------------------------------------------------------------------------------------------------------------------------------------------------------------------------------------------------------------------------------------------------------------------------------------------------------------------------------------------------------------------------------------------------------------------------------------------------------------------|
| USA, Alabama  | Jones JM, Stone M, Sulaeman H, Fink RV, Dave H, Levy ME, Di Germanio C, Green V, Notari E, Saa P, Biggerstaff BJ, Strauss D, Kessler D, Vassallo R, Reik R, Rossmann S, Destree M, Nguyen KA, Sayers M, Lough C, Bougie DW, Ritter M, Latoni G, Weales B, Sime S, Gorlin J, Brown NE, Gould CV, Berney K, Benoit TJ, Miller MJ, Freeman D, Kartik D, Fry AM, Azziz-Baumgartner E, Hall AJ, MacNeil A, Gundlapalli AV, Basavaraju SV, Gerber SI, Patton ME, Custer B, Williamson P, Simmons G, Thornburg NJ, Kleinman S, Stramer SL, Opsomer J, Busch MP. Estimated US Infection- and Vaccine-Induced SARS-CoV-2 Seroprevalence Based on Blood Donations, July 2020-May 2021. JAMA. 2021. |
| USA, Alabama  | Centers for Disease Control and Prevention (CDC). CDC COVID Data Tracker Commercial Laboratory Seroprevalence Survey Data. Atlanta, United States of America: Centers for Disease Control and Prevention (CDC).                                                                                                                                                                                                                                                                                                                                                                                                                                                                          |
| USA, Alabama  | Anand S, Montez-Rath M, Han J, Bozeman J, Kerschmann R, Beyer P, Parsonnet J, Chertow GM. Prevalence of SARS-CoV-2 antibodies in a large nationwide sample of patients on dialysis in the USA: a cross-sectional study. Lancet. 2020.                                                                                                                                                                                                                                                                                                                                                                                                                                                    |
| USA, Alaska   | Jones JM, Stone M, Sulaeman H, Fink RV, Dave H, Levy ME, Di Germanio C, Green V, Notari E, Saa P, Biggerstaff BJ, Strauss D, Kessler D, Vassallo R, Reik R, Rossmann S, Destree M, Nguyen KA, Sayers M, Lough C, Bougie DW, Ritter M, Latoni G, Weales B, Sime S, Gorlin J, Brown NE, Gould CV, Berney K, Benoit TJ, Miller MJ, Freeman D, Kartik D, Fry AM, Azziz-Baumgartner E, Hall AJ, MacNeil A, Gundlapalli AV, Basavaraju SV, Gerber SI, Patton ME, Custer B, Williamson P, Simmons G, Thornburg NJ, Kleinman S, Stramer SL, Opsomer J, Busch MP. Estimated US Infection- and Vaccine-Induced SARS-CoV-2 Seroprevalence Based on Blood Donations, July 2020-May 2021. JAMA. 2021. |
| USA, Alaska   | Centers for Disease Control and Prevention (CDC). CDC COVID Data Tracker Commercial Laboratory Seroprevalence Survey Data. Atlanta, United States of America: Centers for Disease Control and Prevention (CDC).                                                                                                                                                                                                                                                                                                                                                                                                                                                                          |
| USA, Alaska   | Anand S, Montez-Rath M, Han J, Bozeman J, Kerschmann R, Beyer P, Parsonnet J, Chertow GM. Prevalence of SARS-CoV-2 antibodies in a large nationwide sample of patients on dialysis in the USA: a cross-sectional study. Lancet. 2020.                                                                                                                                                                                                                                                                                                                                                                                                                                                    |
| USA, Arizona  | Jones JM, Stone M, Sulaeman H, Fink RV, Dave H, Levy ME, Di Germanio C, Green V, Notari E, Saa P, Biggerstaff BJ, Strauss D, Kessler D, Vassallo R, Reik R, Rossmann S, Destree M, Nguyen KA, Sayers M, Lough C, Bougie DW, Ritter M, Latoni G, Weales B, Sime S, Gorlin J, Brown NE, Gould CV, Berney K, Benoit TJ, Miller MJ, Freeman D, Kartik D, Fry AM, Azziz-Baumgartner E, Hall AJ, MacNeil A, Gundlapalli AV, Basavaraju SV, Gerber SI, Patton ME, Custer B, Williamson P, Simmons G, Thornburg NJ, Kleinman S, Stramer SL, Opsomer J, Busch MP. Estimated US Infection- and Vaccine-Induced SARS-CoV-2 Seroprevalence Based on Blood Donations, July 2020-May 2021. JAMA. 2021. |
| USA, Arizona  | Centers for Disease Control and Prevention (CDC). CDC COVID Data Tracker Commercial Laboratory Seroprevalence Survey Data. Atlanta, United States of America: Centers for Disease Control and Prevention (CDC).                                                                                                                                                                                                                                                                                                                                                                                                                                                                          |
| USA, Arizona  | Anand S, Montez-Rath M, Han J, Bozeman J, Kerschmann R, Beyer P, Parsonnet J, Chertow GM. Prevalence of SARS-CoV-2 antibodies in a large nationwide sample of patients on dialysis in the USA: a cross-sectional study. Lancet. 2020.                                                                                                                                                                                                                                                                                                                                                                                                                                                    |
| USA, Arkansas | Jones JM, Stone M, Sulaeman H, Fink RV, Dave H, Levy ME, Di Germanio C, Green V, Notari E, Saa P, Biggerstaff BJ, Strauss D, Kessler D, Vassallo R, Reik R, Rossmann S, Destree M, Nguyen KA, Sayers M, Lough C, Bougie DW, Ritter M, Latoni G, Weales B, Sime S, Gorlin J, Brown NE, Gould CV, Berney K, Benoit TJ, Miller MJ, Freeman D, Kartik D, Fry AM, Azziz-Baumgartner E, Hall AJ, MacNeil A, Gundlapalli AV, Basavaraju SV, Gerber SI, Patton ME, Custer B, Williamson P, Simmons G, Thornburg NJ, Kleinman S, Stramer SL, Opsomer J, Busch MP. Estimated US Infection- and Vaccine-Induced SARS-CoV-2 Seroprevalence Based on Blood Donations, July 2020-May 2021. JAMA. 2021. |
| USA, Arkansas | Centers for Disease Control and Prevention (CDC). CDC COVID Data Tracker Commercial Laboratory Seroprevalence Survey Data. Atlanta, United States of America: Centers for Disease Control and Prevention (CDC).                                                                                                                                                                                                                                                                                                                                                                                                                                                                          |

|                  |                                                                                                                                                                                                                                                                                                                                                                                                                                                                                                                                                                                                                                                                                                  |
|------------------|--------------------------------------------------------------------------------------------------------------------------------------------------------------------------------------------------------------------------------------------------------------------------------------------------------------------------------------------------------------------------------------------------------------------------------------------------------------------------------------------------------------------------------------------------------------------------------------------------------------------------------------------------------------------------------------------------|
| USA, Arkansas    | Anand S, Montez-Rath M, Han J, Bozeman J, Kerschmann R, Beyer P, Parsonnet J, Chertow GM. Prevalence of SARS-CoV-2 antibodies in a large nationwide sample of patients on dialysis in the USA: a cross-sectional study. <i>Lancet</i> . 2020.                                                                                                                                                                                                                                                                                                                                                                                                                                                    |
| USA, California  | Jones JM, Stone M, Sulaeman H, Fink RV, Dave H, Levy ME, Di Germanio C, Green V, Notari E, Saa P, Biggerstaff BJ, Strauss D, Kessler D, Vassallo R, Reik R, Rossmann S, Destree M, Nguyen KA, Sayers M, Lough C, Bougie DW, Ritter M, Latoni G, Weales B, Sime S, Gorlin J, Brown NE, Gould CV, Berney K, Benoit TJ, Miller MJ, Freeman D, Kartik D, Fry AM, Azziz-Baumgartner E, Hall AJ, MacNeil A, Gundlapalli AV, Basavaraju SV, Gerber SI, Patton ME, Custer B, Williamson P, Simmons G, Thornburg NJ, Kleinman S, Stramer SL, Opsomer J, Busch MP. Estimated US Infection- and Vaccine-Induced SARS-CoV-2 Seroprevalence Based on Blood Donations, July 2020-May 2021. <i>JAMA</i> . 2021. |
| USA, California  | Centers for Disease Control and Prevention (CDC). CDC COVID Data Tracker Commercial Laboratory Seroprevalence Survey Data. Atlanta, United States of America: Centers for Disease Control and Prevention (CDC).                                                                                                                                                                                                                                                                                                                                                                                                                                                                                  |
| USA, California  | Anand S, Montez-Rath M, Han J, Bozeman J, Kerschmann R, Beyer P, Parsonnet J, Chertow GM. Prevalence of SARS-CoV-2 antibodies in a large nationwide sample of patients on dialysis in the USA: a cross-sectional study. <i>Lancet</i> . 2020.                                                                                                                                                                                                                                                                                                                                                                                                                                                    |
| USA, Colorado    | Jones JM, Stone M, Sulaeman H, Fink RV, Dave H, Levy ME, Di Germanio C, Green V, Notari E, Saa P, Biggerstaff BJ, Strauss D, Kessler D, Vassallo R, Reik R, Rossmann S, Destree M, Nguyen KA, Sayers M, Lough C, Bougie DW, Ritter M, Latoni G, Weales B, Sime S, Gorlin J, Brown NE, Gould CV, Berney K, Benoit TJ, Miller MJ, Freeman D, Kartik D, Fry AM, Azziz-Baumgartner E, Hall AJ, MacNeil A, Gundlapalli AV, Basavaraju SV, Gerber SI, Patton ME, Custer B, Williamson P, Simmons G, Thornburg NJ, Kleinman S, Stramer SL, Opsomer J, Busch MP. Estimated US Infection- and Vaccine-Induced SARS-CoV-2 Seroprevalence Based on Blood Donations, July 2020-May 2021. <i>JAMA</i> . 2021. |
| USA, Colorado    | Centers for Disease Control and Prevention (CDC). CDC COVID Data Tracker Commercial Laboratory Seroprevalence Survey Data. Atlanta, United States of America: Centers for Disease Control and Prevention (CDC).                                                                                                                                                                                                                                                                                                                                                                                                                                                                                  |
| USA, Connecticut | Jones JM, Stone M, Sulaeman H, Fink RV, Dave H, Levy ME, Di Germanio C, Green V, Notari E, Saa P, Biggerstaff BJ, Strauss D, Kessler D, Vassallo R, Reik R, Rossmann S, Destree M, Nguyen KA, Sayers M, Lough C, Bougie DW, Ritter M, Latoni G, Weales B, Sime S, Gorlin J, Brown NE, Gould CV, Berney K, Benoit TJ, Miller MJ, Freeman D, Kartik D, Fry AM, Azziz-Baumgartner E, Hall AJ, MacNeil A, Gundlapalli AV, Basavaraju SV, Gerber SI, Patton ME, Custer B, Williamson P, Simmons G, Thornburg NJ, Kleinman S, Stramer SL, Opsomer J, Busch MP. Estimated US Infection- and Vaccine-Induced SARS-CoV-2 Seroprevalence Based on Blood Donations, July 2020-May 2021. <i>JAMA</i> . 2021. |
| USA, Connecticut | Havers FP, Reed C, Lim T, Montgomery JM, Klena JD, Hall AJ, Fry AM, Cannon DL, Chiang CF, Gibbons A, Krapiunaya I, Morales-Betoulle M, Roguski K, Rasheed MAU, Freeman B, Lester S, Mills L, Carroll DS, Owen SM, Johnson JA, Semenova V, Blackmore C, Blog D, Chai SJ, Dunn A, Hand J, Jain S, Lindquist S, Lynfield R, Pritchard S, Sokol T, Sosa L, Turabelidze G, Watkins SM, Wiesman J, Williams RW, Yendell S, Schiffer J, Thornburg NJ. Seroprevalence of Antibodies to SARS-CoV-2 in 10 Sites in the United States, March 23-May 12, 2020. <i>JAMA Intern Med</i> . 2020.                                                                                                                |
| USA, Connecticut | Centers for Disease Control and Prevention (CDC). CDC COVID Data Tracker Commercial Laboratory Seroprevalence Survey Data. Atlanta, United States of America: Centers for Disease Control and Prevention (CDC).                                                                                                                                                                                                                                                                                                                                                                                                                                                                                  |
| USA, Connecticut | Anand S, Montez-Rath M, Han J, Bozeman J, Kerschmann R, Beyer P, Parsonnet J, Chertow GM. Prevalence of SARS-CoV-2 antibodies in a large nationwide sample of patients on dialysis in the USA: a cross-sectional study. <i>Lancet</i> . 2020.                                                                                                                                                                                                                                                                                                                                                                                                                                                    |
| USA, Delaware    | Jones JM, Stone M, Sulaeman H, Fink RV, Dave H, Levy ME, Di Germanio C, Green V, Notari E, Saa P, Biggerstaff BJ, Strauss D, Kessler D, Vassallo R, Reik R, Rossmann S, Destree M, Nguyen KA, Sayers M, Lough C, Bougie DW, Ritter M, Latoni G, Weales B, Sime S, Gorlin J, Brown NE, Gould CV, Berney K, Benoit TJ, Miller MJ, Freeman D, Kartik D, Fry AM, Azziz-Baumgartner E, Hall AJ, MacNeil A, Gundlapalli AV, Basavaraju SV, Gerber SI, Patton ME, Custer B, Williamson P, Simmons G, Thornburg NJ, Kleinman S, Stramer SL, Opsomer J,                                                                                                                                                   |

|               |                                                                                                                                                                                                                                                                                                                                                                                                                                                                                                                                                                                                                                                                                          |
|---------------|------------------------------------------------------------------------------------------------------------------------------------------------------------------------------------------------------------------------------------------------------------------------------------------------------------------------------------------------------------------------------------------------------------------------------------------------------------------------------------------------------------------------------------------------------------------------------------------------------------------------------------------------------------------------------------------|
|               | Busch MP. Estimated US Infection- and Vaccine-Induced SARS-CoV-2 Seroprevalence Based on Blood Donations, July 2020-May 2021. JAMA. 2021.                                                                                                                                                                                                                                                                                                                                                                                                                                                                                                                                                |
| USA, Delaware | Centers for Disease Control and Prevention (CDC). CDC COVID Data Tracker Commercial Laboratory Seroprevalence Survey Data. Atlanta, United States of America: Centers for Disease Control and Prevention (CDC).                                                                                                                                                                                                                                                                                                                                                                                                                                                                          |
| USA, Delaware | Anand S, Montez-Rath M, Han J, Bozeman J, Kerschmann R, Beyer P, Parsonnet J, Chertow GM. Prevalence of SARS-CoV-2 antibodies in a large nationwide sample of patients on dialysis in the USA: a cross-sectional study. Lancet. 2020.                                                                                                                                                                                                                                                                                                                                                                                                                                                    |
| USA, Florida  | Jones JM, Stone M, Sulaeman H, Fink RV, Dave H, Levy ME, Di Germanio C, Green V, Notari E, Saa P, Biggerstaff BJ, Strauss D, Kessler D, Vassallo R, Reik R, Rossmann S, Destree M, Nguyen KA, Sayers M, Lough C, Bougie DW, Ritter M, Latoni G, Weales B, Sime S, Gorlin J, Brown NE, Gould CV, Berney K, Benoit TJ, Miller MJ, Freeman D, Kartik D, Fry AM, Azziz-Baumgartner E, Hall AJ, MacNeil A, Gundlapalli AV, Basavaraju SV, Gerber SI, Patton ME, Custer B, Williamson P, Simmons G, Thornburg NJ, Kleinman S, Stramer SL, Opsomer J, Busch MP. Estimated US Infection- and Vaccine-Induced SARS-CoV-2 Seroprevalence Based on Blood Donations, July 2020-May 2021. JAMA. 2021. |
| USA, Florida  | Centers for Disease Control and Prevention (CDC). CDC COVID Data Tracker Commercial Laboratory Seroprevalence Survey Data. Atlanta, United States of America: Centers for Disease Control and Prevention (CDC).                                                                                                                                                                                                                                                                                                                                                                                                                                                                          |
| USA, Florida  | Anand S, Montez-Rath M, Han J, Bozeman J, Kerschmann R, Beyer P, Parsonnet J, Chertow GM. Prevalence of SARS-CoV-2 antibodies in a large nationwide sample of patients on dialysis in the USA: a cross-sectional study. Lancet. 2020.                                                                                                                                                                                                                                                                                                                                                                                                                                                    |
| USA, Georgia  | Jones JM, Stone M, Sulaeman H, Fink RV, Dave H, Levy ME, Di Germanio C, Green V, Notari E, Saa P, Biggerstaff BJ, Strauss D, Kessler D, Vassallo R, Reik R, Rossmann S, Destree M, Nguyen KA, Sayers M, Lough C, Bougie DW, Ritter M, Latoni G, Weales B, Sime S, Gorlin J, Brown NE, Gould CV, Berney K, Benoit TJ, Miller MJ, Freeman D, Kartik D, Fry AM, Azziz-Baumgartner E, Hall AJ, MacNeil A, Gundlapalli AV, Basavaraju SV, Gerber SI, Patton ME, Custer B, Williamson P, Simmons G, Thornburg NJ, Kleinman S, Stramer SL, Opsomer J, Busch MP. Estimated US Infection- and Vaccine-Induced SARS-CoV-2 Seroprevalence Based on Blood Donations, July 2020-May 2021. JAMA. 2021. |
| USA, Georgia  | Centers for Disease Control and Prevention (CDC). CDC COVID Data Tracker Commercial Laboratory Seroprevalence Survey Data. Atlanta, United States of America: Centers for Disease Control and Prevention (CDC).                                                                                                                                                                                                                                                                                                                                                                                                                                                                          |
| USA, Georgia  | Anand S, Montez-Rath M, Han J, Bozeman J, Kerschmann R, Beyer P, Parsonnet J, Chertow GM. Prevalence of SARS-CoV-2 antibodies in a large nationwide sample of patients on dialysis in the USA: a cross-sectional study. Lancet. 2020.                                                                                                                                                                                                                                                                                                                                                                                                                                                    |
| USA, Hawaii   | Jones JM, Stone M, Sulaeman H, Fink RV, Dave H, Levy ME, Di Germanio C, Green V, Notari E, Saa P, Biggerstaff BJ, Strauss D, Kessler D, Vassallo R, Reik R, Rossmann S, Destree M, Nguyen KA, Sayers M, Lough C, Bougie DW, Ritter M, Latoni G, Weales B, Sime S, Gorlin J, Brown NE, Gould CV, Berney K, Benoit TJ, Miller MJ, Freeman D, Kartik D, Fry AM, Azziz-Baumgartner E, Hall AJ, MacNeil A, Gundlapalli AV, Basavaraju SV, Gerber SI, Patton ME, Custer B, Williamson P, Simmons G, Thornburg NJ, Kleinman S, Stramer SL, Opsomer J, Busch MP. Estimated US Infection- and Vaccine-Induced SARS-CoV-2 Seroprevalence Based on Blood Donations, July 2020-May 2021. JAMA. 2021. |
| USA, Hawaii   | Centers for Disease Control and Prevention (CDC). CDC COVID Data Tracker Commercial Laboratory Seroprevalence Survey Data. Atlanta, United States of America: Centers for Disease Control and Prevention (CDC).                                                                                                                                                                                                                                                                                                                                                                                                                                                                          |
| USA, Hawaii   | Anand S, Montez-Rath M, Han J, Bozeman J, Kerschmann R, Beyer P, Parsonnet J, Chertow GM. Prevalence of SARS-CoV-2 antibodies in a large nationwide sample of patients on dialysis in the USA: a cross-sectional study. Lancet. 2020.                                                                                                                                                                                                                                                                                                                                                                                                                                                    |
| USA, Idaho    | Jones JM, Stone M, Sulaeman H, Fink RV, Dave H, Levy ME, Di Germanio C, Green V, Notari E, Saa P, Biggerstaff BJ, Strauss D, Kessler D, Vassallo R, Reik R, Rossmann S, Destree M, Nguyen KA, Sayers M, Lough C, Bougie DW, Ritter M, Latoni G, Weales B, Sime S, Gorlin J, Brown NE, Gould CV, Berney K, Benoit TJ, Miller MJ, Freeman D, Kartik D, Fry AM, Azziz-Baumgartner E, Hall AJ, MacNeil A, Gundlapalli AV, Basavaraju SV, Gerber SI, Patton ME,                                                                                                                                                                                                                               |



|               |                                                                                                                                                                                                                                                                                                                                                                                                                                                                                                                                                                                                                                                                                          |
|---------------|------------------------------------------------------------------------------------------------------------------------------------------------------------------------------------------------------------------------------------------------------------------------------------------------------------------------------------------------------------------------------------------------------------------------------------------------------------------------------------------------------------------------------------------------------------------------------------------------------------------------------------------------------------------------------------------|
|               | Custer B, Williamson P, Simmons G, Thornburg NJ, Kleinman S, Stramer SL, Opsomer J, Busch MP. Estimated US Infection- and Vaccine-Induced SARS-CoV-2 Seroprevalence Based on Blood Donations, July 2020-May 2021. JAMA. 2021.                                                                                                                                                                                                                                                                                                                                                                                                                                                            |
| USA, Idaho    | Centers for Disease Control and Prevention (CDC). CDC COVID Data Tracker Commercial Laboratory Seroprevalence Survey Data. Atlanta, United States of America: Centers for Disease Control and Prevention (CDC).                                                                                                                                                                                                                                                                                                                                                                                                                                                                          |
| USA, Illinois | Jones JM, Stone M, Sulaeman H, Fink RV, Dave H, Levy ME, Di Germanio C, Green V, Notari E, Saa P, Biggerstaff BJ, Strauss D, Kessler D, Vassallo R, Reik R, Rossmann S, Destree M, Nguyen KA, Sayers M, Lough C, Bougie DW, Ritter M, Latoni G, Weales B, Sime S, Gorlin J, Brown NE, Gould CV, Berney K, Benoit TJ, Miller MJ, Freeman D, Kartik D, Fry AM, Azziz-Baumgartner E, Hall AJ, MacNeil A, Gundlapalli AV, Basavaraju SV, Gerber SI, Patton ME, Custer B, Williamson P, Simmons G, Thornburg NJ, Kleinman S, Stramer SL, Opsomer J, Busch MP. Estimated US Infection- and Vaccine-Induced SARS-CoV-2 Seroprevalence Based on Blood Donations, July 2020-May 2021. JAMA. 2021. |
| USA, Illinois | Centers for Disease Control and Prevention (CDC). CDC COVID Data Tracker Commercial Laboratory Seroprevalence Survey Data. Atlanta, United States of America: Centers for Disease Control and Prevention (CDC).                                                                                                                                                                                                                                                                                                                                                                                                                                                                          |
| USA, Indiana  | Jones JM, Stone M, Sulaeman H, Fink RV, Dave H, Levy ME, Di Germanio C, Green V, Notari E, Saa P, Biggerstaff BJ, Strauss D, Kessler D, Vassallo R, Reik R, Rossmann S, Destree M, Nguyen KA, Sayers M, Lough C, Bougie DW, Ritter M, Latoni G, Weales B, Sime S, Gorlin J, Brown NE, Gould CV, Berney K, Benoit TJ, Miller MJ, Freeman D, Kartik D, Fry AM, Azziz-Baumgartner E, Hall AJ, MacNeil A, Gundlapalli AV, Basavaraju SV, Gerber SI, Patton ME, Custer B, Williamson P, Simmons G, Thornburg NJ, Kleinman S, Stramer SL, Opsomer J, Busch MP. Estimated US Infection- and Vaccine-Induced SARS-CoV-2 Seroprevalence Based on Blood Donations, July 2020-May 2021. JAMA. 2021. |
| USA, Indiana  | Centers for Disease Control and Prevention (CDC). CDC COVID Data Tracker Commercial Laboratory Seroprevalence Survey Data. Atlanta, United States of America: Centers for Disease Control and Prevention (CDC).                                                                                                                                                                                                                                                                                                                                                                                                                                                                          |
| USA, Indiana  | Menachemi N, Yiannoutsos CT, Dixon BE, Duszynski TJ, Fadel WF, Wools-Kaloustian KK, Unruh Needleman N, Box K, Caine V, Norwood C, Weaver L, Halverson PK. Population Point Prevalence of SARS-CoV-2 Infection Based on a Statewide Random Sample - Indiana, April 25-29, 2020. MMWR Morb Mortal Wkly Rep. 2020; 69(29): 960-964.                                                                                                                                                                                                                                                                                                                                                         |
| USA, Indiana  | Anand S, Montez-Rath M, Han J, Bozeman J, Kerschmann R, Beyer P, Parsonnet J, Chertow GM. Prevalence of SARS-CoV-2 antibodies in a large nationwide sample of patients on dialysis in the USA: a cross-sectional study. Lancet. 2020.                                                                                                                                                                                                                                                                                                                                                                                                                                                    |
| USA, Iowa     | Jones JM, Stone M, Sulaeman H, Fink RV, Dave H, Levy ME, Di Germanio C, Green V, Notari E, Saa P, Biggerstaff BJ, Strauss D, Kessler D, Vassallo R, Reik R, Rossmann S, Destree M, Nguyen KA, Sayers M, Lough C, Bougie DW, Ritter M, Latoni G, Weales B, Sime S, Gorlin J, Brown NE, Gould CV, Berney K, Benoit TJ, Miller MJ, Freeman D, Kartik D, Fry AM, Azziz-Baumgartner E, Hall AJ, MacNeil A, Gundlapalli AV, Basavaraju SV, Gerber SI, Patton ME, Custer B, Williamson P, Simmons G, Thornburg NJ, Kleinman S, Stramer SL, Opsomer J, Busch MP. Estimated US Infection- and Vaccine-Induced SARS-CoV-2 Seroprevalence Based on Blood Donations, July 2020-May 2021. JAMA. 2021. |
| USA, Iowa     | Centers for Disease Control and Prevention (CDC). CDC COVID Data Tracker Commercial Laboratory Seroprevalence Survey Data. Atlanta, United States of America: Centers for Disease Control and Prevention (CDC).                                                                                                                                                                                                                                                                                                                                                                                                                                                                          |
| USA, Kansas   | Jones JM, Stone M, Sulaeman H, Fink RV, Dave H, Levy ME, Di Germanio C, Green V, Notari E, Saa P, Biggerstaff BJ, Strauss D, Kessler D, Vassallo R, Reik R, Rossmann S, Destree M, Nguyen KA, Sayers M, Lough C, Bougie DW, Ritter M, Latoni G, Weales B, Sime S, Gorlin J, Brown NE, Gould CV, Berney K, Benoit TJ, Miller MJ, Freeman D, Kartik D, Fry AM, Azziz-Baumgartner E, Hall AJ, MacNeil A, Gundlapalli AV, Basavaraju SV, Gerber SI, Patton ME, Custer B, Williamson P, Simmons G, Thornburg NJ, Kleinman S, Stramer SL, Opsomer J, Busch MP. Estimated US Infection- and Vaccine-Induced SARS-CoV-2 Seroprevalence Based on Blood Donations, July 2020-May 2021. JAMA. 2021. |

|                |                                                                                                                                                                                                                                                                                                                                                                                                                                                                                                                                                                                                                                                                                          |
|----------------|------------------------------------------------------------------------------------------------------------------------------------------------------------------------------------------------------------------------------------------------------------------------------------------------------------------------------------------------------------------------------------------------------------------------------------------------------------------------------------------------------------------------------------------------------------------------------------------------------------------------------------------------------------------------------------------|
| USA, Kansas    | Centers for Disease Control and Prevention (CDC). CDC COVID Data Tracker Commercial Laboratory Seroprevalence Survey Data. Atlanta, United States of America: Centers for Disease Control and Prevention (CDC).                                                                                                                                                                                                                                                                                                                                                                                                                                                                          |
| USA, Kentucky  | Jones JM, Stone M, Sulaeman H, Fink RV, Dave H, Levy ME, Di Germanio C, Green V, Notari E, Saa P, Biggerstaff BJ, Strauss D, Kessler D, Vassallo R, Reik R, Rossmann S, Destree M, Nguyen KA, Sayers M, Lough C, Bougie DW, Ritter M, Latoni G, Weales B, Sime S, Gorlin J, Brown NE, Gould CV, Berney K, Benoit TJ, Miller MJ, Freeman D, Kartik D, Fry AM, Azziz-Baumgartner E, Hall AJ, MacNeil A, Gundlapalli AV, Basavaraju SV, Gerber SI, Patton ME, Custer B, Williamson P, Simmons G, Thornburg NJ, Kleinman S, Stramer SL, Opsomer J, Busch MP. Estimated US Infection- and Vaccine-Induced SARS-CoV-2 Seroprevalence Based on Blood Donations, July 2020-May 2021. JAMA. 2021. |
| USA, Kentucky  | Centers for Disease Control and Prevention (CDC). CDC COVID Data Tracker Commercial Laboratory Seroprevalence Survey Data. Atlanta, United States of America: Centers for Disease Control and Prevention (CDC).                                                                                                                                                                                                                                                                                                                                                                                                                                                                          |
| USA, Kentucky  | Anand S, Montez-Rath M, Han J, Bozeman J, Kerschmann R, Beyer P, Parsonnet J, Chertow GM. Prevalence of SARS-CoV-2 antibodies in a large nationwide sample of patients on dialysis in the USA: a cross-sectional study. Lancet. 2020.                                                                                                                                                                                                                                                                                                                                                                                                                                                    |
| USA, Louisiana | Jones JM, Stone M, Sulaeman H, Fink RV, Dave H, Levy ME, Di Germanio C, Green V, Notari E, Saa P, Biggerstaff BJ, Strauss D, Kessler D, Vassallo R, Reik R, Rossmann S, Destree M, Nguyen KA, Sayers M, Lough C, Bougie DW, Ritter M, Latoni G, Weales B, Sime S, Gorlin J, Brown NE, Gould CV, Berney K, Benoit TJ, Miller MJ, Freeman D, Kartik D, Fry AM, Azziz-Baumgartner E, Hall AJ, MacNeil A, Gundlapalli AV, Basavaraju SV, Gerber SI, Patton ME, Custer B, Williamson P, Simmons G, Thornburg NJ, Kleinman S, Stramer SL, Opsomer J, Busch MP. Estimated US Infection- and Vaccine-Induced SARS-CoV-2 Seroprevalence Based on Blood Donations, July 2020-May 2021. JAMA. 2021. |
| USA, Louisiana | Havers FP, Reed C, Lim T, Montgomery JM, Klena JD, Hall AJ, Fry AM, Cannon DL, Chiang CF, Gibbons A, Krapiunaya I, Morales-Betoulle M, Roguski K, Rasheed MAU, Freeman B, Lester S, Mills L, Carroll DS, Owen SM, Johnson JA, Semenova V, Blackmore C, Blog D, Chai SJ, Dunn A, Hand J, Jain S, Lindquist S, Lynfield R, Pritchard S, Sokol T, Sosa L, Turabelidze G, Watkins SM, Wiesman J, Williams RW, Yendell S, Schiffer J, Thornburg NJ. Seroprevalence of Antibodies to SARS-CoV-2 in 10 Sites in the United States, March 23-May 12, 2020. JAMA Intern Med. 2020.                                                                                                                |
| USA, Louisiana | Centers for Disease Control and Prevention (CDC). CDC COVID Data Tracker Commercial Laboratory Seroprevalence Survey Data. Atlanta, United States of America: Centers for Disease Control and Prevention (CDC).                                                                                                                                                                                                                                                                                                                                                                                                                                                                          |
| USA, Maine     | Jones JM, Stone M, Sulaeman H, Fink RV, Dave H, Levy ME, Di Germanio C, Green V, Notari E, Saa P, Biggerstaff BJ, Strauss D, Kessler D, Vassallo R, Reik R, Rossmann S, Destree M, Nguyen KA, Sayers M, Lough C, Bougie DW, Ritter M, Latoni G, Weales B, Sime S, Gorlin J, Brown NE, Gould CV, Berney K, Benoit TJ, Miller MJ, Freeman D, Kartik D, Fry AM, Azziz-Baumgartner E, Hall AJ, MacNeil A, Gundlapalli AV, Basavaraju SV, Gerber SI, Patton ME, Custer B, Williamson P, Simmons G, Thornburg NJ, Kleinman S, Stramer SL, Opsomer J, Busch MP. Estimated US Infection- and Vaccine-Induced SARS-CoV-2 Seroprevalence Based on Blood Donations, July 2020-May 2021. JAMA. 2021. |
| USA, Maine     | Centers for Disease Control and Prevention (CDC). CDC COVID Data Tracker Commercial Laboratory Seroprevalence Survey Data. Atlanta, United States of America: Centers for Disease Control and Prevention (CDC).                                                                                                                                                                                                                                                                                                                                                                                                                                                                          |
| USA, Maryland  | Jones JM, Stone M, Sulaeman H, Fink RV, Dave H, Levy ME, Di Germanio C, Green V, Notari E, Saa P, Biggerstaff BJ, Strauss D, Kessler D, Vassallo R, Reik R, Rossmann S, Destree M, Nguyen KA, Sayers M, Lough C, Bougie DW, Ritter M, Latoni G, Weales B, Sime S, Gorlin J, Brown NE, Gould CV, Berney K, Benoit TJ, Miller MJ, Freeman D, Kartik D, Fry AM, Azziz-Baumgartner E, Hall AJ, MacNeil A, Gundlapalli AV, Basavaraju SV, Gerber SI, Patton ME, Custer B, Williamson P, Simmons G, Thornburg NJ, Kleinman S, Stramer SL, Opsomer J, Busch MP. Estimated US Infection- and Vaccine-Induced SARS-CoV-2 Seroprevalence Based on Blood Donations, July 2020-May 2021. JAMA. 2021. |

|                    |                                                                                                                                                                                                                                                                                                                                                                                                                                                                                                                                                                                                                                                                                                  |
|--------------------|--------------------------------------------------------------------------------------------------------------------------------------------------------------------------------------------------------------------------------------------------------------------------------------------------------------------------------------------------------------------------------------------------------------------------------------------------------------------------------------------------------------------------------------------------------------------------------------------------------------------------------------------------------------------------------------------------|
| USA, Maryland      | Centers for Disease Control and Prevention (CDC). CDC COVID Data Tracker Commercial Laboratory Seroprevalence Survey Data. Atlanta, United States of America: Centers for Disease Control and Prevention (CDC).                                                                                                                                                                                                                                                                                                                                                                                                                                                                                  |
| USA, Maryland      | Anand S, Montez-Rath M, Han J, Bozeman J, Kerschmann R, Beyer P, Parsonnet J, Chertow GM. Prevalence of SARS-CoV-2 antibodies in a large nationwide sample of patients on dialysis in the USA: a cross-sectional study. <i>Lancet</i> . 2020.                                                                                                                                                                                                                                                                                                                                                                                                                                                    |
| USA, Massachusetts | Jones JM, Stone M, Sulaeman H, Fink RV, Dave H, Levy ME, Di Germanio C, Green V, Notari E, Saa P, Biggerstaff BJ, Strauss D, Kessler D, Vassallo R, Reik R, Rossmann S, Destree M, Nguyen KA, Sayers M, Lough C, Bougie DW, Ritter M, Latoni G, Weales B, Sime S, Gorlin J, Brown NE, Gould CV, Berney K, Benoit TJ, Miller MJ, Freeman D, Kartik D, Fry AM, Azziz-Baumgartner E, Hall AJ, MacNeil A, Gundlapalli AV, Basavaraju SV, Gerber SI, Patton ME, Custer B, Williamson P, Simmons G, Thornburg NJ, Kleinman S, Stramer SL, Opsomer J, Busch MP. Estimated US Infection- and Vaccine-Induced SARS-CoV-2 Seroprevalence Based on Blood Donations, July 2020-May 2021. <i>JAMA</i> . 2021. |
| USA, Massachusetts | Centers for Disease Control and Prevention (CDC). CDC COVID Data Tracker Commercial Laboratory Seroprevalence Survey Data. Atlanta, United States of America: Centers for Disease Control and Prevention (CDC).                                                                                                                                                                                                                                                                                                                                                                                                                                                                                  |
| USA, Michigan      | Jones JM, Stone M, Sulaeman H, Fink RV, Dave H, Levy ME, Di Germanio C, Green V, Notari E, Saa P, Biggerstaff BJ, Strauss D, Kessler D, Vassallo R, Reik R, Rossmann S, Destree M, Nguyen KA, Sayers M, Lough C, Bougie DW, Ritter M, Latoni G, Weales B, Sime S, Gorlin J, Brown NE, Gould CV, Berney K, Benoit TJ, Miller MJ, Freeman D, Kartik D, Fry AM, Azziz-Baumgartner E, Hall AJ, MacNeil A, Gundlapalli AV, Basavaraju SV, Gerber SI, Patton ME, Custer B, Williamson P, Simmons G, Thornburg NJ, Kleinman S, Stramer SL, Opsomer J, Busch MP. Estimated US Infection- and Vaccine-Induced SARS-CoV-2 Seroprevalence Based on Blood Donations, July 2020-May 2021. <i>JAMA</i> . 2021. |
| USA, Michigan      | Centers for Disease Control and Prevention (CDC). CDC COVID Data Tracker Commercial Laboratory Seroprevalence Survey Data. Atlanta, United States of America: Centers for Disease Control and Prevention (CDC).                                                                                                                                                                                                                                                                                                                                                                                                                                                                                  |
| USA, Michigan      | Anand S, Montez-Rath M, Han J, Bozeman J, Kerschmann R, Beyer P, Parsonnet J, Chertow GM. Prevalence of SARS-CoV-2 antibodies in a large nationwide sample of patients on dialysis in the USA: a cross-sectional study. <i>Lancet</i> . 2020.                                                                                                                                                                                                                                                                                                                                                                                                                                                    |
| USA, Minnesota     | Jones JM, Stone M, Sulaeman H, Fink RV, Dave H, Levy ME, Di Germanio C, Green V, Notari E, Saa P, Biggerstaff BJ, Strauss D, Kessler D, Vassallo R, Reik R, Rossmann S, Destree M, Nguyen KA, Sayers M, Lough C, Bougie DW, Ritter M, Latoni G, Weales B, Sime S, Gorlin J, Brown NE, Gould CV, Berney K, Benoit TJ, Miller MJ, Freeman D, Kartik D, Fry AM, Azziz-Baumgartner E, Hall AJ, MacNeil A, Gundlapalli AV, Basavaraju SV, Gerber SI, Patton ME, Custer B, Williamson P, Simmons G, Thornburg NJ, Kleinman S, Stramer SL, Opsomer J, Busch MP. Estimated US Infection- and Vaccine-Induced SARS-CoV-2 Seroprevalence Based on Blood Donations, July 2020-May 2021. <i>JAMA</i> . 2021. |
| USA, Minnesota     | Centers for Disease Control and Prevention (CDC). CDC COVID Data Tracker Commercial Laboratory Seroprevalence Survey Data. Atlanta, United States of America: Centers for Disease Control and Prevention (CDC).                                                                                                                                                                                                                                                                                                                                                                                                                                                                                  |
| USA, Minnesota     | Anand S, Montez-Rath M, Han J, Bozeman J, Kerschmann R, Beyer P, Parsonnet J, Chertow GM. Prevalence of SARS-CoV-2 antibodies in a large nationwide sample of patients on dialysis in the USA: a cross-sectional study. <i>Lancet</i> . 2020.                                                                                                                                                                                                                                                                                                                                                                                                                                                    |
| USA, Mississippi   | Jones JM, Stone M, Sulaeman H, Fink RV, Dave H, Levy ME, Di Germanio C, Green V, Notari E, Saa P, Biggerstaff BJ, Strauss D, Kessler D, Vassallo R, Reik R, Rossmann S, Destree M, Nguyen KA, Sayers M, Lough C, Bougie DW, Ritter M, Latoni G, Weales B, Sime S, Gorlin J, Brown NE, Gould CV, Berney K, Benoit TJ, Miller MJ, Freeman D, Kartik D, Fry AM, Azziz-Baumgartner E, Hall AJ, MacNeil A, Gundlapalli AV, Basavaraju SV, Gerber SI, Patton ME, Custer B, Williamson P, Simmons G, Thornburg NJ, Kleinman S, Stramer SL, Opsomer J, Busch MP. Estimated US Infection- and Vaccine-Induced SARS-CoV-2 Seroprevalence Based on Blood Donations, July 2020-May 2021. <i>JAMA</i> . 2021. |

|                  |                                                                                                                                                                                                                                                                                                                                                                                                                                                                                                                                                                                                                                                                                                  |
|------------------|--------------------------------------------------------------------------------------------------------------------------------------------------------------------------------------------------------------------------------------------------------------------------------------------------------------------------------------------------------------------------------------------------------------------------------------------------------------------------------------------------------------------------------------------------------------------------------------------------------------------------------------------------------------------------------------------------|
| USA, Mississippi | Centers for Disease Control and Prevention (CDC). CDC COVID Data Tracker Commercial Laboratory Seroprevalence Survey Data. Atlanta, United States of America: Centers for Disease Control and Prevention (CDC).                                                                                                                                                                                                                                                                                                                                                                                                                                                                                  |
| USA, Mississippi | Anand S, Montez-Rath M, Han J, Bozeman J, Kerschmann R, Beyer P, Parsonnet J, Chertow GM. Prevalence of SARS-CoV-2 antibodies in a large nationwide sample of patients on dialysis in the USA: a cross-sectional study. <i>Lancet</i> . 2020.                                                                                                                                                                                                                                                                                                                                                                                                                                                    |
| USA, Missouri    | Jones JM, Stone M, Sulaeman H, Fink RV, Dave H, Levy ME, Di Germanio C, Green V, Notari E, Saa P, Biggerstaff BJ, Strauss D, Kessler D, Vassallo R, Reik R, Rossmann S, Destree M, Nguyen KA, Sayers M, Lough C, Bougie DW, Ritter M, Latoni G, Weales B, Sime S, Gorlin J, Brown NE, Gould CV, Berney K, Benoit TJ, Miller MJ, Freeman D, Kartik D, Fry AM, Azziz-Baumgartner E, Hall AJ, MacNeil A, Gundlapalli AV, Basavaraju SV, Gerber SI, Patton ME, Custer B, Williamson P, Simmons G, Thornburg NJ, Kleinman S, Stramer SL, Opsomer J, Busch MP. Estimated US Infection- and Vaccine-Induced SARS-CoV-2 Seroprevalence Based on Blood Donations, July 2020-May 2021. <i>JAMA</i> . 2021. |
| USA, Missouri    | Havers FP, Reed C, Lim T, Montgomery JM, Klena JD, Hall AJ, Fry AM, Cannon DL, Chiang CF, Gibbons A, Krapianaya I, Morales-Betoulle M, Roguski K, Rasheed MAU, Freeman B, Lester S, Mills L, Carroll DS, Owen SM, Johnson JA, Semenova V, Blackmore C, Blog D, Chai SJ, Dunn A, Hand J, Jain S, Lindquist S, Lynfield R, Pritchard S, Sokol T, Sosa L, Turabelidze G, Watkins SM, Wiesman J, Williams RW, Yendell S, Schiffer J, Thornburg NJ. Seroprevalence of Antibodies to SARS-CoV-2 in 10 Sites in the United States, March 23-May 12, 2020. <i>JAMA Intern Med</i> . 2020.                                                                                                                |
| USA, Missouri    | Centers for Disease Control and Prevention (CDC). CDC COVID Data Tracker Commercial Laboratory Seroprevalence Survey Data. Atlanta, United States of America: Centers for Disease Control and Prevention (CDC).                                                                                                                                                                                                                                                                                                                                                                                                                                                                                  |
| USA, Missouri    | Anand S, Montez-Rath M, Han J, Bozeman J, Kerschmann R, Beyer P, Parsonnet J, Chertow GM. Prevalence of SARS-CoV-2 antibodies in a large nationwide sample of patients on dialysis in the USA: a cross-sectional study. <i>Lancet</i> . 2020.                                                                                                                                                                                                                                                                                                                                                                                                                                                    |
| USA, Montana     | Jones JM, Stone M, Sulaeman H, Fink RV, Dave H, Levy ME, Di Germanio C, Green V, Notari E, Saa P, Biggerstaff BJ, Strauss D, Kessler D, Vassallo R, Reik R, Rossmann S, Destree M, Nguyen KA, Sayers M, Lough C, Bougie DW, Ritter M, Latoni G, Weales B, Sime S, Gorlin J, Brown NE, Gould CV, Berney K, Benoit TJ, Miller MJ, Freeman D, Kartik D, Fry AM, Azziz-Baumgartner E, Hall AJ, MacNeil A, Gundlapalli AV, Basavaraju SV, Gerber SI, Patton ME, Custer B, Williamson P, Simmons G, Thornburg NJ, Kleinman S, Stramer SL, Opsomer J, Busch MP. Estimated US Infection- and Vaccine-Induced SARS-CoV-2 Seroprevalence Based on Blood Donations, July 2020-May 2021. <i>JAMA</i> . 2021. |
| USA, Montana     | Centers for Disease Control and Prevention (CDC). CDC COVID Data Tracker Commercial Laboratory Seroprevalence Survey Data. Atlanta, United States of America: Centers for Disease Control and Prevention (CDC).                                                                                                                                                                                                                                                                                                                                                                                                                                                                                  |
| USA, Nebraska    | Jones JM, Stone M, Sulaeman H, Fink RV, Dave H, Levy ME, Di Germanio C, Green V, Notari E, Saa P, Biggerstaff BJ, Strauss D, Kessler D, Vassallo R, Reik R, Rossmann S, Destree M, Nguyen KA, Sayers M, Lough C, Bougie DW, Ritter M, Latoni G, Weales B, Sime S, Gorlin J, Brown NE, Gould CV, Berney K, Benoit TJ, Miller MJ, Freeman D, Kartik D, Fry AM, Azziz-Baumgartner E, Hall AJ, MacNeil A, Gundlapalli AV, Basavaraju SV, Gerber SI, Patton ME, Custer B, Williamson P, Simmons G, Thornburg NJ, Kleinman S, Stramer SL, Opsomer J, Busch MP. Estimated US Infection- and Vaccine-Induced SARS-CoV-2 Seroprevalence Based on Blood Donations, July 2020-May 2021. <i>JAMA</i> . 2021. |
| USA, Nebraska    | Centers for Disease Control and Prevention (CDC). CDC COVID Data Tracker Commercial Laboratory Seroprevalence Survey Data. Atlanta, United States of America: Centers for Disease Control and Prevention (CDC).                                                                                                                                                                                                                                                                                                                                                                                                                                                                                  |
| USA, Nebraska    | Anand S, Montez-Rath M, Han J, Bozeman J, Kerschmann R, Beyer P, Parsonnet J, Chertow GM. Prevalence of SARS-CoV-2 antibodies in a large nationwide sample of patients on dialysis in the USA: a cross-sectional study. <i>Lancet</i> . 2020.                                                                                                                                                                                                                                                                                                                                                                                                                                                    |
| USA, Nevada      | Jones JM, Stone M, Sulaeman H, Fink RV, Dave H, Levy ME, Di Germanio C, Green V, Notari E, Saa P, Biggerstaff BJ, Strauss D, Kessler D, Vassallo R, Reik R, Rossmann S, Destree M, Nguyen KA, Sayers M, Lough C, Bougie DW, Ritter M, Latoni G, Weales B, Sime S, Gorlin J,                                                                                                                                                                                                                                                                                                                                                                                                                      |

|                    |                                                                                                                                                                                                                                                                                                                                                                                                                                                                                                                                                                                                                                                                                          |
|--------------------|------------------------------------------------------------------------------------------------------------------------------------------------------------------------------------------------------------------------------------------------------------------------------------------------------------------------------------------------------------------------------------------------------------------------------------------------------------------------------------------------------------------------------------------------------------------------------------------------------------------------------------------------------------------------------------------|
|                    | Brown NE, Gould CV, Berney K, Benoit TJ, Miller MJ, Freeman D, Kartik D, Fry AM, Azziz-Baumgartner E, Hall AJ, MacNeil A, Gundlapalli AV, Basavaraju SV, Gerber SI, Patton ME, Custer B, Williamson P, Simmons G, Thornburg NJ, Kleinman S, Stramer SL, Opsomer J, Busch MP. Estimated US Infection- and Vaccine-Induced SARS-CoV-2 Seroprevalence Based on Blood Donations, July 2020-May 2021. JAMA. 2021.                                                                                                                                                                                                                                                                             |
| USA, Nevada        | Centers for Disease Control and Prevention (CDC). CDC COVID Data Tracker Commercial Laboratory Seroprevalence Survey Data. Atlanta, United States of America: Centers for Disease Control and Prevention (CDC).                                                                                                                                                                                                                                                                                                                                                                                                                                                                          |
| USA, New Hampshire | Jones JM, Stone M, Sulaeman H, Fink RV, Dave H, Levy ME, Di Germanio C, Green V, Notari E, Saa P, Biggerstaff BJ, Strauss D, Kessler D, Vassallo R, Reik R, Rossmann S, Destree M, Nguyen KA, Sayers M, Lough C, Bougie DW, Ritter M, Latoni G, Weales B, Sime S, Gorlin J, Brown NE, Gould CV, Berney K, Benoit TJ, Miller MJ, Freeman D, Kartik D, Fry AM, Azziz-Baumgartner E, Hall AJ, MacNeil A, Gundlapalli AV, Basavaraju SV, Gerber SI, Patton ME, Custer B, Williamson P, Simmons G, Thornburg NJ, Kleinman S, Stramer SL, Opsomer J, Busch MP. Estimated US Infection- and Vaccine-Induced SARS-CoV-2 Seroprevalence Based on Blood Donations, July 2020-May 2021. JAMA. 2021. |
| USA, New Hampshire | Centers for Disease Control and Prevention (CDC). CDC COVID Data Tracker Commercial Laboratory Seroprevalence Survey Data. Atlanta, United States of America: Centers for Disease Control and Prevention (CDC).                                                                                                                                                                                                                                                                                                                                                                                                                                                                          |
| USA, New Jersey    | Jones JM, Stone M, Sulaeman H, Fink RV, Dave H, Levy ME, Di Germanio C, Green V, Notari E, Saa P, Biggerstaff BJ, Strauss D, Kessler D, Vassallo R, Reik R, Rossmann S, Destree M, Nguyen KA, Sayers M, Lough C, Bougie DW, Ritter M, Latoni G, Weales B, Sime S, Gorlin J, Brown NE, Gould CV, Berney K, Benoit TJ, Miller MJ, Freeman D, Kartik D, Fry AM, Azziz-Baumgartner E, Hall AJ, MacNeil A, Gundlapalli AV, Basavaraju SV, Gerber SI, Patton ME, Custer B, Williamson P, Simmons G, Thornburg NJ, Kleinman S, Stramer SL, Opsomer J, Busch MP. Estimated US Infection- and Vaccine-Induced SARS-CoV-2 Seroprevalence Based on Blood Donations, July 2020-May 2021. JAMA. 2021. |
| USA, New Jersey    | Centers for Disease Control and Prevention (CDC). CDC COVID Data Tracker Commercial Laboratory Seroprevalence Survey Data. Atlanta, United States of America: Centers for Disease Control and Prevention (CDC).                                                                                                                                                                                                                                                                                                                                                                                                                                                                          |
| USA, New Jersey    | Anand S, Montez-Rath M, Han J, Bozeman J, Kerschmann R, Beyer P, Parsonnet J, Chertow GM. Prevalence of SARS-CoV-2 antibodies in a large nationwide sample of patients on dialysis in the USA: a cross-sectional study. Lancet. 2020.                                                                                                                                                                                                                                                                                                                                                                                                                                                    |
| USA, New Mexico    | Jones JM, Stone M, Sulaeman H, Fink RV, Dave H, Levy ME, Di Germanio C, Green V, Notari E, Saa P, Biggerstaff BJ, Strauss D, Kessler D, Vassallo R, Reik R, Rossmann S, Destree M, Nguyen KA, Sayers M, Lough C, Bougie DW, Ritter M, Latoni G, Weales B, Sime S, Gorlin J, Brown NE, Gould CV, Berney K, Benoit TJ, Miller MJ, Freeman D, Kartik D, Fry AM, Azziz-Baumgartner E, Hall AJ, MacNeil A, Gundlapalli AV, Basavaraju SV, Gerber SI, Patton ME, Custer B, Williamson P, Simmons G, Thornburg NJ, Kleinman S, Stramer SL, Opsomer J, Busch MP. Estimated US Infection- and Vaccine-Induced SARS-CoV-2 Seroprevalence Based on Blood Donations, July 2020-May 2021. JAMA. 2021. |
| USA, New Mexico    | Centers for Disease Control and Prevention (CDC). CDC COVID Data Tracker Commercial Laboratory Seroprevalence Survey Data. Atlanta, United States of America: Centers for Disease Control and Prevention (CDC).                                                                                                                                                                                                                                                                                                                                                                                                                                                                          |
| USA, New Mexico    | Anand S, Montez-Rath M, Han J, Bozeman J, Kerschmann R, Beyer P, Parsonnet J, Chertow GM. Prevalence of SARS-CoV-2 antibodies in a large nationwide sample of patients on dialysis in the USA: a cross-sectional study. Lancet. 2020.                                                                                                                                                                                                                                                                                                                                                                                                                                                    |
| USA, New York      | Jones JM, Stone M, Sulaeman H, Fink RV, Dave H, Levy ME, Di Germanio C, Green V, Notari E, Saa P, Biggerstaff BJ, Strauss D, Kessler D, Vassallo R, Reik R, Rossmann S, Destree M, Nguyen KA, Sayers M, Lough C, Bougie DW, Ritter M, Latoni G, Weales B, Sime S, Gorlin J, Brown NE, Gould CV, Berney K, Benoit TJ, Miller MJ, Freeman D, Kartik D, Fry AM, Azziz-Baumgartner E, Hall AJ, MacNeil A, Gundlapalli AV, Basavaraju SV, Gerber SI, Patton ME, Custer B, Williamson P, Simmons G, Thornburg NJ, Kleinman S, Stramer SL, Opsomer J, Busch MP. Estimated US Infection- and Vaccine-Induced SARS-CoV-2 Seroprevalence Based on Blood Donations, July 2020-May 2021. JAMA. 2021. |

|                     |                                                                                                                                                                                                                                                                                                                                                                                                                                                                                                                                                                                                                                                                                                 |
|---------------------|-------------------------------------------------------------------------------------------------------------------------------------------------------------------------------------------------------------------------------------------------------------------------------------------------------------------------------------------------------------------------------------------------------------------------------------------------------------------------------------------------------------------------------------------------------------------------------------------------------------------------------------------------------------------------------------------------|
| USA, New York       | Centers for Disease Control and Prevention (CDC). CDC COVID Data Tracker Commercial Laboratory Seroprevalence Survey Data. Atlanta, United States of America: Centers for Disease Control and Prevention (CDC).                                                                                                                                                                                                                                                                                                                                                                                                                                                                                 |
| USA, New York       | Rosenberg ES, Tesoriero JM, Rosenthal EM, Chung R, Barranco MA, Styer LM, Parker MM, John Leung SY, Morne JE, Greene D, Holtgrave DR, Hoefler D, Kumar J, Udo T, Hutton B, Zucker HA. Cumulative incidence and diagnosis of SARS-CoV-2 infection in New York. <i>Ann Epidemiol.</i> 2020; 48: 23-29e4.                                                                                                                                                                                                                                                                                                                                                                                          |
| USA, New York       | Anand S, Montez-Rath M, Han J, Bozeman J, Kerschmann R, Beyer P, Parsonnet J, Chertow GM. Prevalence of SARS-CoV-2 antibodies in a large nationwide sample of patients on dialysis in the USA: a cross-sectional study. <i>Lancet.</i> 2020.                                                                                                                                                                                                                                                                                                                                                                                                                                                    |
| USA, North Carolina | Jones JM, Stone M, Sulaeman H, Fink RV, Dave H, Levy ME, Di Germanio C, Green V, Notari E, Saa P, Biggerstaff BJ, Strauss D, Kessler D, Vassallo R, Reik R, Rossmann S, Destree M, Nguyen KA, Sayers M, Lough C, Bougie DW, Ritter M, Latoni G, Weales B, Sime S, Gorlin J, Brown NE, Gould CV, Berney K, Benoit TJ, Miller MJ, Freeman D, Kartik D, Fry AM, Azziz-Baumgartner E, Hall AJ, MacNeil A, Gundlapalli AV, Basavaraju SV, Gerber SI, Patton ME, Custer B, Williamson P, Simmons G, Thornburg NJ, Kleinman S, Stramer SL, Opsomer J, Busch MP. Estimated US Infection- and Vaccine-Induced SARS-CoV-2 Seroprevalence Based on Blood Donations, July 2020-May 2021. <i>JAMA.</i> 2021. |
| USA, North Carolina | Centers for Disease Control and Prevention (CDC). CDC COVID Data Tracker Commercial Laboratory Seroprevalence Survey Data. Atlanta, United States of America: Centers for Disease Control and Prevention (CDC).                                                                                                                                                                                                                                                                                                                                                                                                                                                                                 |
| USA, North Carolina | Anand S, Montez-Rath M, Han J, Bozeman J, Kerschmann R, Beyer P, Parsonnet J, Chertow GM. Prevalence of SARS-CoV-2 antibodies in a large nationwide sample of patients on dialysis in the USA: a cross-sectional study. <i>Lancet.</i> 2020.                                                                                                                                                                                                                                                                                                                                                                                                                                                    |
| USA, North Dakota   | Jones JM, Stone M, Sulaeman H, Fink RV, Dave H, Levy ME, Di Germanio C, Green V, Notari E, Saa P, Biggerstaff BJ, Strauss D, Kessler D, Vassallo R, Reik R, Rossmann S, Destree M, Nguyen KA, Sayers M, Lough C, Bougie DW, Ritter M, Latoni G, Weales B, Sime S, Gorlin J, Brown NE, Gould CV, Berney K, Benoit TJ, Miller MJ, Freeman D, Kartik D, Fry AM, Azziz-Baumgartner E, Hall AJ, MacNeil A, Gundlapalli AV, Basavaraju SV, Gerber SI, Patton ME, Custer B, Williamson P, Simmons G, Thornburg NJ, Kleinman S, Stramer SL, Opsomer J, Busch MP. Estimated US Infection- and Vaccine-Induced SARS-CoV-2 Seroprevalence Based on Blood Donations, July 2020-May 2021. <i>JAMA.</i> 2021. |
| USA, North Dakota   | Centers for Disease Control and Prevention (CDC). CDC COVID Data Tracker Commercial Laboratory Seroprevalence Survey Data. Atlanta, United States of America: Centers for Disease Control and Prevention (CDC).                                                                                                                                                                                                                                                                                                                                                                                                                                                                                 |
| USA, Ohio           | Jones JM, Stone M, Sulaeman H, Fink RV, Dave H, Levy ME, Di Germanio C, Green V, Notari E, Saa P, Biggerstaff BJ, Strauss D, Kessler D, Vassallo R, Reik R, Rossmann S, Destree M, Nguyen KA, Sayers M, Lough C, Bougie DW, Ritter M, Latoni G, Weales B, Sime S, Gorlin J, Brown NE, Gould CV, Berney K, Benoit TJ, Miller MJ, Freeman D, Kartik D, Fry AM, Azziz-Baumgartner E, Hall AJ, MacNeil A, Gundlapalli AV, Basavaraju SV, Gerber SI, Patton ME, Custer B, Williamson P, Simmons G, Thornburg NJ, Kleinman S, Stramer SL, Opsomer J, Busch MP. Estimated US Infection- and Vaccine-Induced SARS-CoV-2 Seroprevalence Based on Blood Donations, July 2020-May 2021. <i>JAMA.</i> 2021. |
| USA, Ohio           | Centers for Disease Control and Prevention (CDC). CDC COVID Data Tracker Commercial Laboratory Seroprevalence Survey Data. Atlanta, United States of America: Centers for Disease Control and Prevention (CDC).                                                                                                                                                                                                                                                                                                                                                                                                                                                                                 |
| USA, Ohio           | Ohio Department of Health, Ohio State University. United States - Ohio Prevalence of Current and Past COVID-19 in Adults July 2020.                                                                                                                                                                                                                                                                                                                                                                                                                                                                                                                                                             |
| USA, Ohio           | Anand S, Montez-Rath M, Han J, Bozeman J, Kerschmann R, Beyer P, Parsonnet J, Chertow GM. Prevalence of SARS-CoV-2 antibodies in a large nationwide sample of patients on dialysis in the USA: a cross-sectional study. <i>Lancet.</i> 2020.                                                                                                                                                                                                                                                                                                                                                                                                                                                    |
| USA, Oklahoma       | Jones JM, Stone M, Sulaeman H, Fink RV, Dave H, Levy ME, Di Germanio C, Green V, Notari E, Saa P, Biggerstaff BJ, Strauss D, Kessler D, Vassallo R, Reik R, Rossmann S, Destree M, Nguyen KA, Sayers M, Lough C, Bougie DW, Ritter M, Latoni G, Weales B, Sime S, Gorlin J, Brown NE, Gould CV, Berney K, Benoit TJ, Miller MJ, Freeman D, Kartik D, Fry AM, Azziz-                                                                                                                                                                                                                                                                                                                             |

|                     |                                                                                                                                                                                                                                                                                                                                                                                                                                                                                                                                                                                                                                                                                          |
|---------------------|------------------------------------------------------------------------------------------------------------------------------------------------------------------------------------------------------------------------------------------------------------------------------------------------------------------------------------------------------------------------------------------------------------------------------------------------------------------------------------------------------------------------------------------------------------------------------------------------------------------------------------------------------------------------------------------|
|                     | Baumgartner E, Hall AJ, MacNeil A, Gundlapalli AV, Basavaraju SV, Gerber SI, Patton ME, Custer B, Williamson P, Simmons G, Thornburg NJ, Kleinman S, Stramer SL, Opsomer J, Busch MP. Estimated US Infection- and Vaccine-Induced SARS-CoV-2 Seroprevalence Based on Blood Donations, July 2020-May 2021. JAMA. 2021.                                                                                                                                                                                                                                                                                                                                                                    |
| USA, Oklahoma       | Centers for Disease Control and Prevention (CDC). CDC COVID Data Tracker Commercial Laboratory Seroprevalence Survey Data. Atlanta, United States of America: Centers for Disease Control and Prevention (CDC).                                                                                                                                                                                                                                                                                                                                                                                                                                                                          |
| USA, Oklahoma       | Anand S, Montez-Rath M, Han J, Bozeman J, Kerschmann R, Beyer P, Parsonnet J, Chertow GM. Prevalence of SARS-CoV-2 antibodies in a large nationwide sample of patients on dialysis in the USA: a cross-sectional study. Lancet. 2020.                                                                                                                                                                                                                                                                                                                                                                                                                                                    |
| USA, Oregon         | Jones JM, Stone M, Sulaeman H, Fink RV, Dave H, Levy ME, Di Germanio C, Green V, Notari E, Saa P, Biggerstaff BJ, Strauss D, Kessler D, Vassallo R, Reik R, Rossmann S, Destree M, Nguyen KA, Sayers M, Lough C, Bougie DW, Ritter M, Latoni G, Weales B, Sime S, Gorlin J, Brown NE, Gould CV, Berney K, Benoit TJ, Miller MJ, Freeman D, Kartik D, Fry AM, Azziz-Baumgartner E, Hall AJ, MacNeil A, Gundlapalli AV, Basavaraju SV, Gerber SI, Patton ME, Custer B, Williamson P, Simmons G, Thornburg NJ, Kleinman S, Stramer SL, Opsomer J, Busch MP. Estimated US Infection- and Vaccine-Induced SARS-CoV-2 Seroprevalence Based on Blood Donations, July 2020-May 2021. JAMA. 2021. |
| USA, Oregon         | Centers for Disease Control and Prevention (CDC). CDC COVID Data Tracker Commercial Laboratory Seroprevalence Survey Data. Atlanta, United States of America: Centers for Disease Control and Prevention (CDC).                                                                                                                                                                                                                                                                                                                                                                                                                                                                          |
| USA, Oregon         | Anand S, Montez-Rath M, Han J, Bozeman J, Kerschmann R, Beyer P, Parsonnet J, Chertow GM. Prevalence of SARS-CoV-2 antibodies in a large nationwide sample of patients on dialysis in the USA: a cross-sectional study. Lancet. 2020.                                                                                                                                                                                                                                                                                                                                                                                                                                                    |
| USA, Pennsylvania   | Jones JM, Stone M, Sulaeman H, Fink RV, Dave H, Levy ME, Di Germanio C, Green V, Notari E, Saa P, Biggerstaff BJ, Strauss D, Kessler D, Vassallo R, Reik R, Rossmann S, Destree M, Nguyen KA, Sayers M, Lough C, Bougie DW, Ritter M, Latoni G, Weales B, Sime S, Gorlin J, Brown NE, Gould CV, Berney K, Benoit TJ, Miller MJ, Freeman D, Kartik D, Fry AM, Azziz-Baumgartner E, Hall AJ, MacNeil A, Gundlapalli AV, Basavaraju SV, Gerber SI, Patton ME, Custer B, Williamson P, Simmons G, Thornburg NJ, Kleinman S, Stramer SL, Opsomer J, Busch MP. Estimated US Infection- and Vaccine-Induced SARS-CoV-2 Seroprevalence Based on Blood Donations, July 2020-May 2021. JAMA. 2021. |
| USA, Pennsylvania   | Centers for Disease Control and Prevention (CDC). CDC COVID Data Tracker Commercial Laboratory Seroprevalence Survey Data. Atlanta, United States of America: Centers for Disease Control and Prevention (CDC).                                                                                                                                                                                                                                                                                                                                                                                                                                                                          |
| USA, Pennsylvania   | Anand S, Montez-Rath M, Han J, Bozeman J, Kerschmann R, Beyer P, Parsonnet J, Chertow GM. Prevalence of SARS-CoV-2 antibodies in a large nationwide sample of patients on dialysis in the USA: a cross-sectional study. Lancet. 2020.                                                                                                                                                                                                                                                                                                                                                                                                                                                    |
| USA, Rhode Island   | Jones JM, Stone M, Sulaeman H, Fink RV, Dave H, Levy ME, Di Germanio C, Green V, Notari E, Saa P, Biggerstaff BJ, Strauss D, Kessler D, Vassallo R, Reik R, Rossmann S, Destree M, Nguyen KA, Sayers M, Lough C, Bougie DW, Ritter M, Latoni G, Weales B, Sime S, Gorlin J, Brown NE, Gould CV, Berney K, Benoit TJ, Miller MJ, Freeman D, Kartik D, Fry AM, Azziz-Baumgartner E, Hall AJ, MacNeil A, Gundlapalli AV, Basavaraju SV, Gerber SI, Patton ME, Custer B, Williamson P, Simmons G, Thornburg NJ, Kleinman S, Stramer SL, Opsomer J, Busch MP. Estimated US Infection- and Vaccine-Induced SARS-CoV-2 Seroprevalence Based on Blood Donations, July 2020-May 2021. JAMA. 2021. |
| USA, Rhode Island   | Centers for Disease Control and Prevention (CDC). CDC COVID Data Tracker Commercial Laboratory Seroprevalence Survey Data. Atlanta, United States of America: Centers for Disease Control and Prevention (CDC).                                                                                                                                                                                                                                                                                                                                                                                                                                                                          |
| USA, South Carolina | Jones JM, Stone M, Sulaeman H, Fink RV, Dave H, Levy ME, Di Germanio C, Green V, Notari E, Saa P, Biggerstaff BJ, Strauss D, Kessler D, Vassallo R, Reik R, Rossmann S, Destree M, Nguyen KA, Sayers M, Lough C, Bougie DW, Ritter M, Latoni G, Weales B, Sime S, Gorlin J, Brown NE, Gould CV, Berney K, Benoit TJ, Miller MJ, Freeman D, Kartik D, Fry AM, Azziz-Baumgartner E, Hall AJ, MacNeil A, Gundlapalli AV, Basavaraju SV, Gerber SI, Patton ME, Custer B, Williamson P, Simmons G, Thornburg NJ, Kleinman S, Stramer SL, Opsomer J,                                                                                                                                           |

|                     |                                                                                                                                                                                                                                                                                                                                                                                                                                                                                                                                                                                                                                                                                          |
|---------------------|------------------------------------------------------------------------------------------------------------------------------------------------------------------------------------------------------------------------------------------------------------------------------------------------------------------------------------------------------------------------------------------------------------------------------------------------------------------------------------------------------------------------------------------------------------------------------------------------------------------------------------------------------------------------------------------|
|                     | Busch MP. Estimated US Infection- and Vaccine-Induced SARS-CoV-2 Seroprevalence Based on Blood Donations, July 2020-May 2021. JAMA. 2021.                                                                                                                                                                                                                                                                                                                                                                                                                                                                                                                                                |
| USA, South Carolina | Centers for Disease Control and Prevention (CDC). CDC COVID Data Tracker Commercial Laboratory Seroprevalence Survey Data. Atlanta, United States of America: Centers for Disease Control and Prevention (CDC).                                                                                                                                                                                                                                                                                                                                                                                                                                                                          |
| USA, South Carolina | Anand S, Montez-Rath M, Han J, Bozeman J, Kerschmann R, Beyer P, Parsonnet J, Chertow GM. Prevalence of SARS-CoV-2 antibodies in a large nationwide sample of patients on dialysis in the USA: a cross-sectional study. Lancet. 2020.                                                                                                                                                                                                                                                                                                                                                                                                                                                    |
| USA, South Dakota   | Jones JM, Stone M, Sulaeman H, Fink RV, Dave H, Levy ME, Di Germanio C, Green V, Notari E, Saa P, Biggerstaff BJ, Strauss D, Kessler D, Vassallo R, Reik R, Rossmann S, Destree M, Nguyen KA, Sayers M, Lough C, Bougie DW, Ritter M, Latoni G, Weales B, Sime S, Gorlin J, Brown NE, Gould CV, Berney K, Benoit TJ, Miller MJ, Freeman D, Kartik D, Fry AM, Azziz-Baumgartner E, Hall AJ, MacNeil A, Gundlapalli AV, Basavaraju SV, Gerber SI, Patton ME, Custer B, Williamson P, Simmons G, Thornburg NJ, Kleinman S, Stramer SL, Opsomer J, Busch MP. Estimated US Infection- and Vaccine-Induced SARS-CoV-2 Seroprevalence Based on Blood Donations, July 2020-May 2021. JAMA. 2021. |
| USA, South Dakota   | Centers for Disease Control and Prevention (CDC). CDC COVID Data Tracker Commercial Laboratory Seroprevalence Survey Data. Atlanta, United States of America: Centers for Disease Control and Prevention (CDC).                                                                                                                                                                                                                                                                                                                                                                                                                                                                          |
| USA, Tennessee      | Jones JM, Stone M, Sulaeman H, Fink RV, Dave H, Levy ME, Di Germanio C, Green V, Notari E, Saa P, Biggerstaff BJ, Strauss D, Kessler D, Vassallo R, Reik R, Rossmann S, Destree M, Nguyen KA, Sayers M, Lough C, Bougie DW, Ritter M, Latoni G, Weales B, Sime S, Gorlin J, Brown NE, Gould CV, Berney K, Benoit TJ, Miller MJ, Freeman D, Kartik D, Fry AM, Azziz-Baumgartner E, Hall AJ, MacNeil A, Gundlapalli AV, Basavaraju SV, Gerber SI, Patton ME, Custer B, Williamson P, Simmons G, Thornburg NJ, Kleinman S, Stramer SL, Opsomer J, Busch MP. Estimated US Infection- and Vaccine-Induced SARS-CoV-2 Seroprevalence Based on Blood Donations, July 2020-May 2021. JAMA. 2021. |
| USA, Tennessee      | Centers for Disease Control and Prevention (CDC). CDC COVID Data Tracker Commercial Laboratory Seroprevalence Survey Data. Atlanta, United States of America: Centers for Disease Control and Prevention (CDC).                                                                                                                                                                                                                                                                                                                                                                                                                                                                          |
| USA, Tennessee      | Anand S, Montez-Rath M, Han J, Bozeman J, Kerschmann R, Beyer P, Parsonnet J, Chertow GM. Prevalence of SARS-CoV-2 antibodies in a large nationwide sample of patients on dialysis in the USA: a cross-sectional study. Lancet. 2020.                                                                                                                                                                                                                                                                                                                                                                                                                                                    |
| USA, Texas          | Jones JM, Stone M, Sulaeman H, Fink RV, Dave H, Levy ME, Di Germanio C, Green V, Notari E, Saa P, Biggerstaff BJ, Strauss D, Kessler D, Vassallo R, Reik R, Rossmann S, Destree M, Nguyen KA, Sayers M, Lough C, Bougie DW, Ritter M, Latoni G, Weales B, Sime S, Gorlin J, Brown NE, Gould CV, Berney K, Benoit TJ, Miller MJ, Freeman D, Kartik D, Fry AM, Azziz-Baumgartner E, Hall AJ, MacNeil A, Gundlapalli AV, Basavaraju SV, Gerber SI, Patton ME, Custer B, Williamson P, Simmons G, Thornburg NJ, Kleinman S, Stramer SL, Opsomer J, Busch MP. Estimated US Infection- and Vaccine-Induced SARS-CoV-2 Seroprevalence Based on Blood Donations, July 2020-May 2021. JAMA. 2021. |
| USA, Texas          | Centers for Disease Control and Prevention (CDC). CDC COVID Data Tracker Commercial Laboratory Seroprevalence Survey Data. Atlanta, United States of America: Centers for Disease Control and Prevention (CDC).                                                                                                                                                                                                                                                                                                                                                                                                                                                                          |
| USA, Texas          | Anand S, Montez-Rath M, Han J, Bozeman J, Kerschmann R, Beyer P, Parsonnet J, Chertow GM. Prevalence of SARS-CoV-2 antibodies in a large nationwide sample of patients on dialysis in the USA: a cross-sectional study. Lancet. 2020.                                                                                                                                                                                                                                                                                                                                                                                                                                                    |
| USA, Utah           | Jones JM, Stone M, Sulaeman H, Fink RV, Dave H, Levy ME, Di Germanio C, Green V, Notari E, Saa P, Biggerstaff BJ, Strauss D, Kessler D, Vassallo R, Reik R, Rossmann S, Destree M, Nguyen KA, Sayers M, Lough C, Bougie DW, Ritter M, Latoni G, Weales B, Sime S, Gorlin J, Brown NE, Gould CV, Berney K, Benoit TJ, Miller MJ, Freeman D, Kartik D, Fry AM, Azziz-Baumgartner E, Hall AJ, MacNeil A, Gundlapalli AV, Basavaraju SV, Gerber SI, Patton ME, Custer B, Williamson P, Simmons G, Thornburg NJ, Kleinman S, Stramer SL, Opsomer J, Busch MP. Estimated US Infection- and Vaccine-Induced SARS-CoV-2 Seroprevalence Based on Blood Donations, July 2020-May 2021. JAMA. 2021. |



|                     |                                                                                                                                                                                                                                                                                                                                                                                                                                                                                                                                                                                                                                                                                                 |
|---------------------|-------------------------------------------------------------------------------------------------------------------------------------------------------------------------------------------------------------------------------------------------------------------------------------------------------------------------------------------------------------------------------------------------------------------------------------------------------------------------------------------------------------------------------------------------------------------------------------------------------------------------------------------------------------------------------------------------|
| USA, Utah           | Havers FP, Reed C, Lim T, Montgomery JM, Klena JD, Hall AJ, Fry AM, Cannon DL, Chiang CF, Gibbons A, Krapiunaya I, Morales-Betoulle M, Roguski K, Rasheed MAU, Freeman B, Lester S, Mills L, Carroll DS, Owen SM, Johnson JA, Semenova V, Blackmore C, Blog D, Chai SJ, Dunn A, Hand J, Jain S, Lindquist S, Lynfield R, Pritchard S, Sokol T, Sosa L, Turabelidze G, Watkins SM, Wiesman J, Williams RW, Yendell S, Schiffer J, Thornburg NJ. Seroprevalence of Antibodies to SARS-CoV-2 in 10 Sites in the United States, March 23-May 12, 2020. <i>JAMA Intern Med.</i> 2020.                                                                                                                |
| USA, Utah           | Centers for Disease Control and Prevention (CDC). CDC COVID Data Tracker Commercial Laboratory Seroprevalence Survey Data. Atlanta, United States of America: Centers for Disease Control and Prevention (CDC).                                                                                                                                                                                                                                                                                                                                                                                                                                                                                 |
| USA, Utah           | Anand S, Montez-Rath M, Han J, Bozeman J, Kerschmann R, Beyer P, Parsonnet J, Chertow GM. Prevalence of SARS-CoV-2 antibodies in a large nationwide sample of patients on dialysis in the USA: a cross-sectional study. <i>Lancet.</i> 2020.                                                                                                                                                                                                                                                                                                                                                                                                                                                    |
| USA, Vermont        | Jones JM, Stone M, Sulaeman H, Fink RV, Dave H, Levy ME, Di Germanio C, Green V, Notari E, Saa P, Biggerstaff BJ, Strauss D, Kessler D, Vassallo R, Reik R, Rossmann S, Destree M, Nguyen KA, Sayers M, Lough C, Bougie DW, Ritter M, Latoni G, Weales B, Sime S, Gorlin J, Brown NE, Gould CV, Berney K, Benoit TJ, Miller MJ, Freeman D, Kartik D, Fry AM, Azziz-Baumgartner E, Hall AJ, MacNeil A, Gundlapalli AV, Basavaraju SV, Gerber SI, Patton ME, Custer B, Williamson P, Simmons G, Thornburg NJ, Kleinman S, Stramer SL, Opsomer J, Busch MP. Estimated US Infection- and Vaccine-Induced SARS-CoV-2 Seroprevalence Based on Blood Donations, July 2020-May 2021. <i>JAMA.</i> 2021. |
| USA, Vermont        | Centers for Disease Control and Prevention (CDC). CDC COVID Data Tracker Commercial Laboratory Seroprevalence Survey Data. Atlanta, United States of America: Centers for Disease Control and Prevention (CDC).                                                                                                                                                                                                                                                                                                                                                                                                                                                                                 |
| USA, Virginia       | Jones JM, Stone M, Sulaeman H, Fink RV, Dave H, Levy ME, Di Germanio C, Green V, Notari E, Saa P, Biggerstaff BJ, Strauss D, Kessler D, Vassallo R, Reik R, Rossmann S, Destree M, Nguyen KA, Sayers M, Lough C, Bougie DW, Ritter M, Latoni G, Weales B, Sime S, Gorlin J, Brown NE, Gould CV, Berney K, Benoit TJ, Miller MJ, Freeman D, Kartik D, Fry AM, Azziz-Baumgartner E, Hall AJ, MacNeil A, Gundlapalli AV, Basavaraju SV, Gerber SI, Patton ME, Custer B, Williamson P, Simmons G, Thornburg NJ, Kleinman S, Stramer SL, Opsomer J, Busch MP. Estimated US Infection- and Vaccine-Induced SARS-CoV-2 Seroprevalence Based on Blood Donations, July 2020-May 2021. <i>JAMA.</i> 2021. |
| USA, Virginia       | Centers for Disease Control and Prevention (CDC). CDC COVID Data Tracker Commercial Laboratory Seroprevalence Survey Data. Atlanta, United States of America: Centers for Disease Control and Prevention (CDC).                                                                                                                                                                                                                                                                                                                                                                                                                                                                                 |
| USA, Washington     | Jones JM, Stone M, Sulaeman H, Fink RV, Dave H, Levy ME, Di Germanio C, Green V, Notari E, Saa P, Biggerstaff BJ, Strauss D, Kessler D, Vassallo R, Reik R, Rossmann S, Destree M, Nguyen KA, Sayers M, Lough C, Bougie DW, Ritter M, Latoni G, Weales B, Sime S, Gorlin J, Brown NE, Gould CV, Berney K, Benoit TJ, Miller MJ, Freeman D, Kartik D, Fry AM, Azziz-Baumgartner E, Hall AJ, MacNeil A, Gundlapalli AV, Basavaraju SV, Gerber SI, Patton ME, Custer B, Williamson P, Simmons G, Thornburg NJ, Kleinman S, Stramer SL, Opsomer J, Busch MP. Estimated US Infection- and Vaccine-Induced SARS-CoV-2 Seroprevalence Based on Blood Donations, July 2020-May 2021. <i>JAMA.</i> 2021. |
| USA, Washington     | Centers for Disease Control and Prevention (CDC). CDC COVID Data Tracker Commercial Laboratory Seroprevalence Survey Data. Atlanta, United States of America: Centers for Disease Control and Prevention (CDC).                                                                                                                                                                                                                                                                                                                                                                                                                                                                                 |
| USA, Washington     | Anand S, Montez-Rath M, Han J, Bozeman J, Kerschmann R, Beyer P, Parsonnet J, Chertow GM. Prevalence of SARS-CoV-2 antibodies in a large nationwide sample of patients on dialysis in the USA: a cross-sectional study. <i>Lancet.</i> 2020.                                                                                                                                                                                                                                                                                                                                                                                                                                                    |
| USA, Washington     | McCulloch DJ, Jackson ML, Hughes JP, Lester S, Mills L, Freeman B, Rasheed MAU, Thornburg NJ, Chu HY. Seroprevalence of SARS-CoV-2 antibodies in Seattle, Washington: October 2019-April 2020. <i>PLoS One.</i> 2021; 16(5): e0252235.                                                                                                                                                                                                                                                                                                                                                                                                                                                          |
| USA, Washington, DC | Jones JM, Stone M, Sulaeman H, Fink RV, Dave H, Levy ME, Di Germanio C, Green V, Notari E, Saa P, Biggerstaff BJ, Strauss D, Kessler D, Vassallo R, Reik R, Rossmann S, Destree M, Nguyen KA, Sayers M, Lough C, Bougie DW, Ritter M, Latoni G, Weales B, Sime S, Gorlin J,                                                                                                                                                                                                                                                                                                                                                                                                                     |

|                     |                                                                                                                                                                                                                                                                                                                                                                                                                                                                                                                                                                                                                                                                                          |
|---------------------|------------------------------------------------------------------------------------------------------------------------------------------------------------------------------------------------------------------------------------------------------------------------------------------------------------------------------------------------------------------------------------------------------------------------------------------------------------------------------------------------------------------------------------------------------------------------------------------------------------------------------------------------------------------------------------------|
|                     | Brown NE, Gould CV, Berney K, Benoit TJ, Miller MJ, Freeman D, Kartik D, Fry AM, Azziz-Baumgartner E, Hall AJ, MacNeil A, Gundlapalli AV, Basavaraju SV, Gerber SI, Patton ME, Custer B, Williamson P, Simmons G, Thornburg NJ, Kleinman S, Stramer SL, Opsomer J, Busch MP. Estimated US Infection- and Vaccine-Induced SARS-CoV-2 Seroprevalence Based on Blood Donations, July 2020-May 2021. JAMA. 2021.                                                                                                                                                                                                                                                                             |
| USA, Washington, DC | Centers for Disease Control and Prevention (CDC). CDC COVID Data Tracker Commercial Laboratory Seroprevalence Survey Data. Atlanta, United States of America: Centers for Disease Control and Prevention (CDC).                                                                                                                                                                                                                                                                                                                                                                                                                                                                          |
| USA, West Virginia  | Jones JM, Stone M, Sulaeman H, Fink RV, Dave H, Levy ME, Di Germanio C, Green V, Notari E, Saa P, Biggerstaff BJ, Strauss D, Kessler D, Vassallo R, Reik R, Rossmann S, Destree M, Nguyen KA, Sayers M, Lough C, Bougie DW, Ritter M, Latoni G, Weales B, Sime S, Gorlin J, Brown NE, Gould CV, Berney K, Benoit TJ, Miller MJ, Freeman D, Kartik D, Fry AM, Azziz-Baumgartner E, Hall AJ, MacNeil A, Gundlapalli AV, Basavaraju SV, Gerber SI, Patton ME, Custer B, Williamson P, Simmons G, Thornburg NJ, Kleinman S, Stramer SL, Opsomer J, Busch MP. Estimated US Infection- and Vaccine-Induced SARS-CoV-2 Seroprevalence Based on Blood Donations, July 2020-May 2021. JAMA. 2021. |
| USA, West Virginia  | Centers for Disease Control and Prevention (CDC). CDC COVID Data Tracker Commercial Laboratory Seroprevalence Survey Data. Atlanta, United States of America: Centers for Disease Control and Prevention (CDC).                                                                                                                                                                                                                                                                                                                                                                                                                                                                          |
| USA, Wisconsin      | Jones JM, Stone M, Sulaeman H, Fink RV, Dave H, Levy ME, Di Germanio C, Green V, Notari E, Saa P, Biggerstaff BJ, Strauss D, Kessler D, Vassallo R, Reik R, Rossmann S, Destree M, Nguyen KA, Sayers M, Lough C, Bougie DW, Ritter M, Latoni G, Weales B, Sime S, Gorlin J, Brown NE, Gould CV, Berney K, Benoit TJ, Miller MJ, Freeman D, Kartik D, Fry AM, Azziz-Baumgartner E, Hall AJ, MacNeil A, Gundlapalli AV, Basavaraju SV, Gerber SI, Patton ME, Custer B, Williamson P, Simmons G, Thornburg NJ, Kleinman S, Stramer SL, Opsomer J, Busch MP. Estimated US Infection- and Vaccine-Induced SARS-CoV-2 Seroprevalence Based on Blood Donations, July 2020-May 2021. JAMA. 2021. |
| USA, Wisconsin      | Centers for Disease Control and Prevention (CDC). CDC COVID Data Tracker Commercial Laboratory Seroprevalence Survey Data. Atlanta, United States of America: Centers for Disease Control and Prevention (CDC).                                                                                                                                                                                                                                                                                                                                                                                                                                                                          |
| USA, Wisconsin      | Anand S, Montez-Rath M, Han J, Bozeman J, Kerschmann R, Beyer P, Parsonnet J, Chertow GM. Prevalence of SARS-CoV-2 antibodies in a large nationwide sample of patients on dialysis in the USA: a cross-sectional study. Lancet. 2020.                                                                                                                                                                                                                                                                                                                                                                                                                                                    |
| USA, Wyoming        | Jones JM, Stone M, Sulaeman H, Fink RV, Dave H, Levy ME, Di Germanio C, Green V, Notari E, Saa P, Biggerstaff BJ, Strauss D, Kessler D, Vassallo R, Reik R, Rossmann S, Destree M, Nguyen KA, Sayers M, Lough C, Bougie DW, Ritter M, Latoni G, Weales B, Sime S, Gorlin J, Brown NE, Gould CV, Berney K, Benoit TJ, Miller MJ, Freeman D, Kartik D, Fry AM, Azziz-Baumgartner E, Hall AJ, MacNeil A, Gundlapalli AV, Basavaraju SV, Gerber SI, Patton ME, Custer B, Williamson P, Simmons G, Thornburg NJ, Kleinman S, Stramer SL, Opsomer J, Busch MP. Estimated US Infection- and Vaccine-Induced SARS-CoV-2 Seroprevalence Based on Blood Donations, July 2020-May 2021. JAMA. 2021. |
| USA, Wyoming        | Centers for Disease Control and Prevention (CDC). CDC COVID Data Tracker Commercial Laboratory Seroprevalence Survey Data. Atlanta, United States of America: Centers for Disease Control and Prevention (CDC).                                                                                                                                                                                                                                                                                                                                                                                                                                                                          |
| Uzbekistan          | Rakhimov RA, Ibadullaeva NS, Khikmatullaeva AS, Abdukadirova MA, Sadirova SS, Lokteva LM, Rakhimov RR, Bayjanov AK, Samatova IR. Formation of Herd Immunity to SARS-CoV-2 in the Regions of Uzbekistan. European Journal of Molecular Clinical Medicine. 2021; 8(3): 574-81.                                                                                                                                                                                                                                                                                                                                                                                                             |
| Yemen               | *                                                                                                                                                                                                                                                                                                                                                                                                                                                                                                                                                                                                                                                                                        |
| Zambia              | Mulenga LB, Hines JZ, Fwoloshi S, Chirwa L, Siwingwa M, Yingst S, Wolkon A, Barradas DT, Favaloro J, Zulu JE, Banda D, Nikoi KI, Kampamba D, Banda N, Chilopa B, Hanunka B, Stevens TL Jr, Shibemba A, Mwale C, Sivile S, Zyambo KD, Makupe A, Kapina M, Mweemba A, Sinyange N, Kapata N, Zulu PM, Chanda D, Mupeta F, Chilufya C, Mukonka V, Agolory S,                                                                                                                                                                                                                                                                                                                                 |

|  |                                                                                                                                                 |
|--|-------------------------------------------------------------------------------------------------------------------------------------------------|
|  | Malama K. Prevalence of SARS-CoV-2 in six districts in Zambia in July, 2020: a cross-sectional cluster sample survey. Lancet Glob Health. 2021. |
|--|-------------------------------------------------------------------------------------------------------------------------------------------------|

Section 4: Age-stratified seroprevalence sources

Figure S4: Age-stratified seroprevalence data coverage by location

**Seroprevalence Age Stratified**

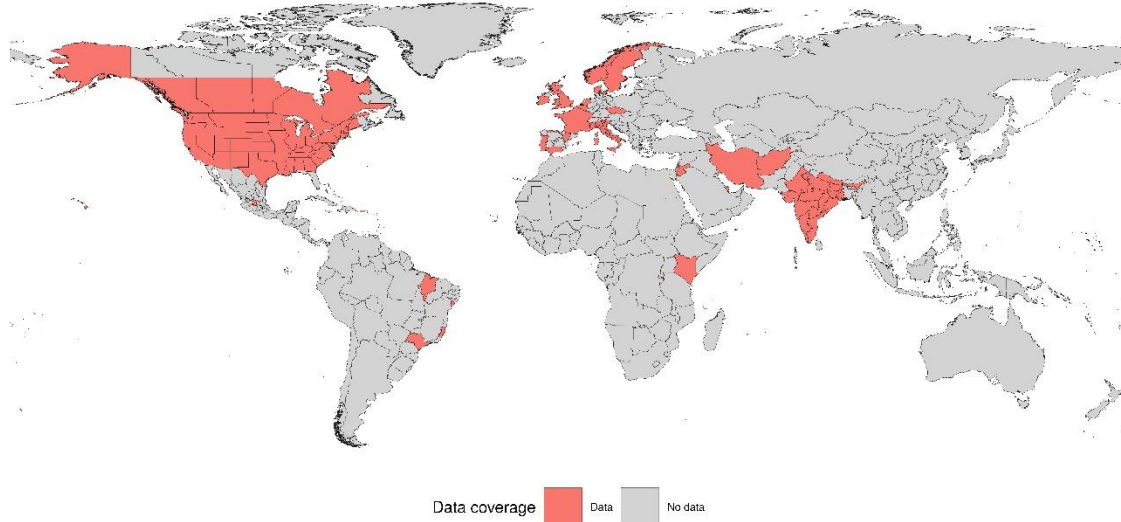

Table S4. Age-stratified seroprevalence data sources by location

| Location               | Source                                                                                                                                                                                                                                                                                                                                                                                                                                                                                         |
|------------------------|------------------------------------------------------------------------------------------------------------------------------------------------------------------------------------------------------------------------------------------------------------------------------------------------------------------------------------------------------------------------------------------------------------------------------------------------------------------------------------------------|
| Afghanistan            | World Health Organization (WHO). Prevalence of COVID-19 and its Related Deaths in Afghanistan: A Nationwide, Population-Based Seroepidemiological Study July 2020. Kabul, Afghanistan: Ministry of Public Health (Afghanistan), 2021.                                                                                                                                                                                                                                                          |
| Andorra                | Royo-Cebrecos C, Vilanova D, López J, Arroyo V, Francisco G, Pons M, Carrasco MG, Piqué JM, Sanz S, Dobaño C, García-Basteiro A. Mass SARS-CoV-2 serological screening for the Principality of Andorra. Preprint. Res Sq. 2020.                                                                                                                                                                                                                                                                |
| Belgium                | Herzog S, De Bie J, Abrams S, Wouters I, Ekinci E, Patteet L, Coppens A, De Spiegeleer S, Beutels P, Van Damme P, Hens N, Theeten H. Seroprevalence of IgG antibodies against SARS coronavirus 2 in Belgium - a serial prospective cross-sectional nationwide study of residual samples. Preprint. medRxiv. 2020.                                                                                                                                                                              |
| Brazil                 | Menezes AMB, Victora CG, Hartwig FP, Silveira MF, Horta BL, Barros AJD, Mesenburg MA, Wehrmeister FC, Pellanda LC, Dellagostin OA, Struchiner CJ, Burattini MN, Barros FC, Hallal PC. High prevalence of symptoms among Brazilian subjects with antibodies against SARS-CoV-2. Sci Rep. 2021; 11(1): 13279.                                                                                                                                                                                    |
| Brazil, Espírito Santo | Gomes CC, Cerutti Jr C, Zandonade E, Maciel ELN, Carvalho de Alencar FE, Almada GL, Cardoso OA, Medeiros Jabor P, Zanotti RL, Queiroz Reuter T, Gomes de Andrade VL, Bastos WM, Fernandes de Medeiros Jr N. A population-based study of the prevalence of COVID-19 infection in Espírito Santo, Brazil: methodology and results of the first stage. Preprint. medRxiv. 2020.                                                                                                                   |
| Brazil, Maranhão       | Silva AAM da, Lima Neto LG, Azevedo C de MP e S de, Costa LMM da, Bragança MLBM, Barros Filho AKD, Wittlin BB, Souza BF de, Oliveira BLCA de, Carvalho CA de, Thomaz ÉBAF, Simões Neto EA, Leite Júnior JF, Cosme LMSS, Campos MAG, Queiroz RC de S, Costa SS, Carvalho VA de, Simões VMF, Alves MTSS de B e, Santos AM dos. Population-based seroprevalence of SARS-CoV-2 is more than halfway through the herd immunity threshold in the State of Maranhao, Brazil. Preprint. medRxiv. 2020. |

|                          |                                                                                                                                                                                                                                                                                                                                                                                                                                                                                                                                                                                                 |
|--------------------------|-------------------------------------------------------------------------------------------------------------------------------------------------------------------------------------------------------------------------------------------------------------------------------------------------------------------------------------------------------------------------------------------------------------------------------------------------------------------------------------------------------------------------------------------------------------------------------------------------|
| Brazil, Maranhão         | Secretary of State for Health (Brazil - Maranhão). Prevalence of SARS-CoV-2 virus infection in Maranhão, Brazil, Final Research Report, Phase II, October 2020.                                                                                                                                                                                                                                                                                                                                                                                                                                 |
| Brazil, São Paulo        | Albuquerque JOM, Kamioka GA, Madalosso G, Costa SA, Ferreira PB, Pino FA, Sato APS, Carvalho ACA, Amorim ABP, Aires CC, Kataoka APAG, Savani ESMM, Bessa TAF, Aguiar BS, Failla MA, Santos EA, Brito EMT, Santos MCH, Silva SMS, Caldeira LAV, Zamarco LC, Fonseca SMS, Lima MMC, Marques IA, Silva FEV, Glasser PR, Burihan PCPR, Cavazzana CL, Lara RC, Mello DS, Pellini ACG, Nishio FY, Kian FM, Braga ES, Bertelli NMP, Fracini W, Gonçalves MDA, Zular PS, Piva RS, Masi E de. Prevalence evolution of SARS-CoV-2 infection in the Municipality of São Paulo, 2020 - 2021. medRxiv. 2021. |
| Brazil, Sergipe          | Federal University of Sergipe (Brazil). Brazil - Evolution of the Prevalence of Infection by SARS-CoV-2 in Sergipe. Third Phase Results: February 18 to March 30, 2021.                                                                                                                                                                                                                                                                                                                                                                                                                         |
| Canada                   | Canadian Blood Services. Canada COVID-19 Seroprevalence Report - August 19, 2020. Ottawa, Canada: Canadian Blood Services, 2020.                                                                                                                                                                                                                                                                                                                                                                                                                                                                |
| Canada                   | Saeed S, Drews SJ, Pambrun C, Yi QL, Osmond L, O'Brien SF. SARS-CoV-2 seroprevalence among blood donors after the first COVID-19 wave in Canada. Transfusion. 2021; 61(3): 862-872.                                                                                                                                                                                                                                                                                                                                                                                                             |
| Canada                   | Investigators A to beat coronavirus/Action pour battre le coronavirus (Ab-CS, Jha P. COVID Seroprevalence, Symptoms and Mortality During the First Wave of SARS-CoV-2 in Canada. medRxiv. 2021.                                                                                                                                                                                                                                                                                                                                                                                                 |
| Canada                   | Canadian Blood Services. Canada COVID-19 Seroprevalence Report - December 18, 2020. Ottawa, Canada: Canadian Blood Services, 2020.                                                                                                                                                                                                                                                                                                                                                                                                                                                              |
| Canada                   | Canadian Blood Services. Canada COVID-19 Seroprevalence Report - January 12, 2021. Ottawa, Canada: Canadian Blood Services, 2021.                                                                                                                                                                                                                                                                                                                                                                                                                                                               |
| Canada                   | Canadian Blood Services. Canada COVID-19 Seroprevalence Report - April 2020 to January 2021. Ottawa, Canada: Canadian Blood Services, 2021.                                                                                                                                                                                                                                                                                                                                                                                                                                                     |
| Canada, Alberta          | Canadian Blood Services. Canada COVID-19 Seroprevalence Report - December 18, 2020. Ottawa, Canada: Canadian Blood Services, 2020.                                                                                                                                                                                                                                                                                                                                                                                                                                                              |
| Canada, British Columbia | Canadian Blood Services. Canada COVID-19 Seroprevalence Report - December 18, 2020. Ottawa, Canada: Canadian Blood Services, 2020.                                                                                                                                                                                                                                                                                                                                                                                                                                                              |
| Canada, Manitoba         | Canadian Blood Services. Canada COVID-19 Seroprevalence Report - December 18, 2020. Ottawa, Canada: Canadian Blood Services, 2020.                                                                                                                                                                                                                                                                                                                                                                                                                                                              |
| Canada, Ontario          | Government of Ontario (Canada), Public Health Ontario (Canada). Canada COVID-19 Seroprevalence in Ontario: March 27, 2020 to June 30, 2020. Canada: Public Health Ontario (Canada), 2020.                                                                                                                                                                                                                                                                                                                                                                                                       |
| Canada, Ontario          | Canadian Blood Services. Canada COVID-19 Seroprevalence Report - December 18, 2020. Ottawa, Canada: Canadian Blood Services, 2020.                                                                                                                                                                                                                                                                                                                                                                                                                                                              |
| Canada, Ontario          | Canadian Blood Services. Canada COVID-19 Seroprevalence Report - January 12, 2021. Ottawa, Canada: Canadian Blood Services, 2021.                                                                                                                                                                                                                                                                                                                                                                                                                                                               |
| Canada, Quebec           | Hema-Quebec (Canada), Quebec National Institute of Public Health (Canada). Canada - Quebec COVID-19 First Wave Blood Donor Seroprevalence Study 2020. Canada: Hema-Quebec (Canada).                                                                                                                                                                                                                                                                                                                                                                                                             |
| Canada, Saskatchewan     | Canadian Blood Services. Canada COVID-19 Seroprevalence Report - December 18, 2020. Ottawa, Canada: Canadian Blood Services, 2020.                                                                                                                                                                                                                                                                                                                                                                                                                                                              |
| Czechia                  | Piler P, Thon V, Andryšková L, Doležel K, Kostka D, Pavlík T, Dušek L, Pikhart H, Bobák M, Matic S, Klánová J. Dynamics of seroconversion of anti-SARS-CoV-2 IgG antibodies in the Czech unvaccinated population: nationwide prospective seroconversion (PROSECO) study. Preprint. medRxiv. 2021.                                                                                                                                                                                                                                                                                               |

|                       |                                                                                                                                                                                                                                                                                                                                                                                                                                                                                                                                                                                                                                                                                                                                                                                                                                                                                                                                                                                              |
|-----------------------|----------------------------------------------------------------------------------------------------------------------------------------------------------------------------------------------------------------------------------------------------------------------------------------------------------------------------------------------------------------------------------------------------------------------------------------------------------------------------------------------------------------------------------------------------------------------------------------------------------------------------------------------------------------------------------------------------------------------------------------------------------------------------------------------------------------------------------------------------------------------------------------------------------------------------------------------------------------------------------------------|
| Denmark               | Erikstrup C, Hother CE, Pedersen OBV, Mølbak K, Skov RL, Holm DK, Sækmoose SG, Nilsson AC, Brooks PT, Boldsen JK, Mikkelsen C, Gybel-Brask M, Sørensen E, Dinh KM, Mikkelsen S, Møller BK, Haunstrup T, Harritshøj L, Jensen BA, Hjalgrim H, Lillevang ST, Ullum H. Estimation of SARS-CoV-2 infection fatality rate by real-time antibody screening of blood donors. Clin Infect Dis. 2020.                                                                                                                                                                                                                                                                                                                                                                                                                                                                                                                                                                                                 |
| Denmark               | Espenhain L, Tribler S, Jørgensen CS, Hansen CH, Sönksen UW, Ethelberg S. Prevalence of SARS-CoV-2 antibodies in Denmark 2020: results from nationwide, population-based sero-epidemiological surveys. Preprint. medRxiv. 2021.                                                                                                                                                                                                                                                                                                                                                                                                                                                                                                                                                                                                                                                                                                                                                              |
| France                | Vu SL, Jones G, Anna F, Rose T, Richard J-B, Bernard-Stoecklin S, Goyard S, Demeret C, Helynck O, Robin C, Monnet V, Facci LP de, Ungeheuer M-N, Léon L, Guillois Y, Filleul L, Charneau P, Lévy-Bruhl D, van der Werf S, Noel H. Prevalence of SARS-CoV-2 antibodies in France: results from nationwide serological surveillance. Preprint. medRxiv. 2020.                                                                                                                                                                                                                                                                                                                                                                                                                                                                                                                                                                                                                                  |
| India                 | Murhekar MV, Bhatnagar T, Selvaraju S, Rade K, Saravanakumar V, Vivian Thangaraj JW, Kumar MS, Shah N, Sabarinathan R, Turuk A, Anand PK, Asthana S, Balachandar R, Bangar SD, Bansal AK, Bhat J, Chakraborty D, Rangaraju C, Chopra V, Das D, Deb AK, Devi KR, Dwivedi GR, Salim Khan SM, Haq I, Kumar MS, Laxmaiah A, Madhuka, Mahapatra A, Mitra A, Nirmala AR, Pagdhune A, Qurieshi MA, Ramarao T, Sahay S, Sharma YK, Shrinivasa MB, Shukla VK, Singh PK, Viramgami A, Wilson VC, Yadav R, Girish Kumar CP, Luke HE, Ranganathan UD, Babu S, Sekar K, Yadav PD, Sapkal GN, Das A, Das P, Dutta S, Hemalatha R, Kumar A, Narain K, Narasimhaiah S, Panda S, Pati S, Patil S, Sarkar K, Singh S, Kant R, Tripathy S, Toteja GS, Babu GR, Kant S, Muliyl JP, Pandey RM, Sarkar S, Singh SK, Zodpey S, Gangakhedkar RR, S Reddy DC, Bhargava B. Prevalence of SARS-CoV-2 infection in India: Findings from the national serosurvey, May-June 2020. Indian J Med Res. 2020; 152(1,2): 48-60. |
| India                 | Murhekar MV, Bhatnagar T, Selvaraju S, Saravanakumar V, Thangaraj JW, Shah N, Kumar MS, Rade K, Sabarinathan R, Asthana S, Balachandar R, Bangar SD, Bansal AK, Bhat J, Chopra V, Das D, Deb AK, Devi KR, Dwivedi GR, Khan SMS, Kumar CPG, Kumar MS, Laxmaiah A, Madhukar M, Mahapatra A, Mohanty SS, Rangaraju C, Turuk A, Baradwaj DK, Chahal AS, Debnath F, Haq I, Kalliath A, Kanungo S, Kshatri JS, Lakshmi GGJN, Mitra A, Nirmala AR, Prasad GV, Qurieshi MA, Sahay S, Sangwan RK, Sekar K, Shukla VK, Singh PK, Singh P, Singh R, Varma DS, Viramgami A, Panda S, Reddy DCS, Bhargava B, ICMR Serosurveillance Group. SARS-CoV-2 antibody seroprevalence in India, August-September, 2020: findings from the second nationwide household serosurvey. Lancet Glob Health. 2021; 9(3): e257-e266.                                                                                                                                                                                       |
| India                 | Murhekar MV, Bhatnagar T, Thangaraj J, Saravanakumar V, Kumar MS, Selvaraju S, Rade K, Kumar C, Sabarinathan R, Turuk A, Asthana S, Balachandar R, Bangar SD, Bansal AK, Chopra V, Das D, Deb AK, Devi KR, Dhikav V, Dwivedi GR, ICMR Serosurveillance Group (2021). I SARS-CoV-2 seroprevalence among the general population and healthcare workers in India, December 2020-January 2021. 2021; 108: 145-155.                                                                                                                                                                                                                                                                                                                                                                                                                                                                                                                                                                               |
| India, Andhra Pradesh | *                                                                                                                                                                                                                                                                                                                                                                                                                                                                                                                                                                                                                                                                                                                                                                                                                                                                                                                                                                                            |
| India, Assam          | *                                                                                                                                                                                                                                                                                                                                                                                                                                                                                                                                                                                                                                                                                                                                                                                                                                                                                                                                                                                            |
| India, Bihar          | *                                                                                                                                                                                                                                                                                                                                                                                                                                                                                                                                                                                                                                                                                                                                                                                                                                                                                                                                                                                            |
| India, Chhattisgarh   | *                                                                                                                                                                                                                                                                                                                                                                                                                                                                                                                                                                                                                                                                                                                                                                                                                                                                                                                                                                                            |
| India, Gujarat        | *                                                                                                                                                                                                                                                                                                                                                                                                                                                                                                                                                                                                                                                                                                                                                                                                                                                                                                                                                                                            |
| India, Haryana        | Health Department, Haryana (India). India - Haryana Covid-19 Sero Survey Round 2, October 2020.                                                                                                                                                                                                                                                                                                                                                                                                                                                                                                                                                                                                                                                                                                                                                                                                                                                                                              |
| India, Jharkhand      | *                                                                                                                                                                                                                                                                                                                                                                                                                                                                                                                                                                                                                                                                                                                                                                                                                                                                                                                                                                                            |
| India, Karnataka      | *                                                                                                                                                                                                                                                                                                                                                                                                                                                                                                                                                                                                                                                                                                                                                                                                                                                                                                                                                                                            |
| India, Kerala         | *                                                                                                                                                                                                                                                                                                                                                                                                                                                                                                                                                                                                                                                                                                                                                                                                                                                                                                                                                                                            |
| India, Madhya Pradesh | *                                                                                                                                                                                                                                                                                                                                                                                                                                                                                                                                                                                                                                                                                                                                                                                                                                                                                                                                                                                            |
| India, Maharashtra    | *                                                                                                                                                                                                                                                                                                                                                                                                                                                                                                                                                                                                                                                                                                                                                                                                                                                                                                                                                                                            |

|                      |                                                                                                                                                                                                                                                                                                                                                                                                                                                                                                                                     |
|----------------------|-------------------------------------------------------------------------------------------------------------------------------------------------------------------------------------------------------------------------------------------------------------------------------------------------------------------------------------------------------------------------------------------------------------------------------------------------------------------------------------------------------------------------------------|
| India, Odisha        | *                                                                                                                                                                                                                                                                                                                                                                                                                                                                                                                                   |
| India, Punjab        | *                                                                                                                                                                                                                                                                                                                                                                                                                                                                                                                                   |
| India, Rajasthan     | *                                                                                                                                                                                                                                                                                                                                                                                                                                                                                                                                   |
| India, Tamil Nadu    | *                                                                                                                                                                                                                                                                                                                                                                                                                                                                                                                                   |
| India, Telangana     | *                                                                                                                                                                                                                                                                                                                                                                                                                                                                                                                                   |
| India, Uttar Pradesh | *                                                                                                                                                                                                                                                                                                                                                                                                                                                                                                                                   |
| India, West Bengal   | *                                                                                                                                                                                                                                                                                                                                                                                                                                                                                                                                   |
| Iran                 | Khalagi K, Gharibzadeh S, Khalili D, Mansournia MA, Mirab Samiee S, Aghamohamadi S, Mir-Mohammad-Ali Roodaki M, Hashemi SM, Tayeri K, Namdari Tabar H, Azadmanesh K, Tabrizi JS, Mohammad K, Hajipour F, Namaki S, Raeisi A, Ostovar A. Prevalence of COVID-19 in Iran: results of the first survey of the Iranian COVID-19 Serological Surveillance programme. <i>Clin Microbiol Infect.</i> 2021.                                                                                                                                 |
| Ireland              | Health Service Executive (HSE) (Ireland), University College Dublin. Ireland Study to Investigate COVID-19 Infection in People Living in Ireland (SCOPI) 2020. Dublin, Ireland: Health Protection Surveillance Centre (HPSC) (Ireland), 2020.                                                                                                                                                                                                                                                                                       |
| Israel               | Reicher S, Ratzon R, Ben-Sahar S, Hermoni-Alon S, Mossinson D, Shenhar Y, Friger M, Lustig Y, Alroy-Preis S, Anis E, Sadetzki S, Kaliner E. Nationwide seroprevalence of antibodies against SARS-CoV-2 in Israel. <i>Eur J Epidemiol.</i> 2021.                                                                                                                                                                                                                                                                                     |
| Italy                | Ministry of Health (Italy), National Institute of Statistics (Italy). Italy SARS-CoV-2 Seroprevalence Survey, First Results 2020.                                                                                                                                                                                                                                                                                                                                                                                                   |
| Jordan               | Bellizzi S, Alsawalha L, Sheikh Ali S, Sharkas G, Muthu N, Ghazo M, Hayajneh W, Profili MC, Obeidat NM. A three-phase population based sero-epidemiological study: Assessing the trend in prevalence of SARS-CoV-2 during COVID-19 pandemic in Jordan. <i>One Health.</i> 2021; 13: 100292.                                                                                                                                                                                                                                         |
| Jordan               | Sughayer MA, Mansour A, Nuirat AA, Souan L, Ghanem M, Siag M, Alhassoon S. Dramatic Rise of Seroprevalence Rates of SARS-CoV-2 Antibodies among Healthy Blood Donors: The evolution of a Pandemic. Preprint. medRxiv. 2021.                                                                                                                                                                                                                                                                                                         |
| Kenya                | Uyoga S, Adetifa IMO, Karanja HK, Nyagwange J, Tuju J, Wanjiku P, Aman R, Mwangangi M, Amoth P, Kasera K, Ng'ang'a W, Rombo C, Yegon CK, Kithi K, Odhiambo E, Rotich T, Orgut I, Kihara S, Otiende M, Bottomley C, Mupe ZN, Kagucia EW, Gallagher K, Etyang A, Voller S, Gitonga J, Mugo D, Agoti CN, Otieno E, Ndwiga L, Lambe T, Wright D, Barasa E, Tsofa B, Bejon P, Ochola-Oyier LI, Agweyu A, Scott AGJ, Warimwe GM. Seroprevalence of anti-SARS-CoV-2 IgG antibodies in Kenyan blood donors. Preprint. medRxiv. 2020.        |
| Kenya                | Adetifa IMO, Uyoga S, Gitonga JN, Mugo D, Otiende M, Nyagwange J, Karanja HK, Tuju J, Wanjiku P, Aman R, Mwangangi M, Amoth P, Kasera K, Nganga W, Rombo C, Yegon C, Kithi K, Odhiambo E, Rotich T, Orgut I, Kihara S, Bottomley C, Kagucia EW, Gallagher KE, Etyang A, Voller S, Lambe T, Wright D, Barasa E, Tsofa B, Bejon P, Ochola-Oyier LI, Agweyu A, Scott JAG, Warimwe GM. Temporal trends of SARS-CoV-2 seroprevalence in transfusion blood donors during the first wave of the COVID-19 epidemic in Kenya. medRxiv. 2021. |
| Mexico               | Government of Mexico, National Institute of Public Health (Mexico). Mexico National Health and Nutrition Survey (ENSANUT) about COVID-19 2020. Cuernavaca, Mexico: National Institute of Public Health (Mexico), 2020.                                                                                                                                                                                                                                                                                                              |
| Mexico               | Muñoz-Medina JE, Grajales-Muñiz C, Salas-Lais AG, Fernandes-Matano L, López-Macías C, Monroy-Muñoz IE, Santos Coy-Arechavaleta A, Palomec-Nava ID, Duque-Molina C, Madera-Sandoval RL, Rivero-Arredondo V, González-Ibarra J, Alvarado-Yaah JE, Rojas-Mendoza T, Santacruz-Tinoco CE, González-Bonilla CR, Borja-Aburto VH. SARS-CoV-2 IgG Antibodies Seroprevalence and Sera Neutralizing Activity in MEXICO: A National Cross-Sectional Study during 2020. <i>Microorganisms.</i> 2021; 9(4).                                     |

|                    |                                                                                                                                                                                                                                                                                                                                                                                                                                                                                                                                                                                                                                                                                                 |
|--------------------|-------------------------------------------------------------------------------------------------------------------------------------------------------------------------------------------------------------------------------------------------------------------------------------------------------------------------------------------------------------------------------------------------------------------------------------------------------------------------------------------------------------------------------------------------------------------------------------------------------------------------------------------------------------------------------------------------|
| Mexico, Guanajuato | Government of Mexico, National Institute of Public Health (Mexico). Mexico National Health and Nutrition Survey (ENSANUT) about COVID-19 2020. Cuernavaca, Mexico: National Institute of Public Health (Mexico), 2020.                                                                                                                                                                                                                                                                                                                                                                                                                                                                          |
| Nepal              | Ministry of Health and Population (Nepal), National Public Health Laboratory (Nepal), World Health Organization (WHO), World Health Organization Regional Office for South-East Asia (SEARO). Nepal National Sero-Prevalence Survey for COVID-19 October 2020.                                                                                                                                                                                                                                                                                                                                                                                                                                  |
| Netherlands        | Slot E, Hogema BM, Reusken CBEM, Reimerink JH, Molier M, Karregat JHM, IJlst J, Novotný VMJ, van Lier RAW, Zaaijer HL. Low SARS-CoV-2 seroprevalence in blood donors in the early COVID-19 epidemic in the Netherlands. <i>Nat Commun.</i> 2020; 11(1): 5744.                                                                                                                                                                                                                                                                                                                                                                                                                                   |
| Netherlands        | Vos ERA, den Hartog G, Schepp RM, Kaaijk P, van Vliet J, Helm K, Smits G, Wijmenga-Monsuur A, Verberk JDM, van Boven M, van Binnendijk RS, de Melker HE, Mollema L, van der Klis FRM. Nationwide seroprevalence of SARS-CoV-2 and identification of risk factors in the general population of the Netherlands during the first epidemic wave. <i>J Epidemiol Community Health.</i> 2020.                                                                                                                                                                                                                                                                                                        |
| Norway             | Norwegian Institute of Public Health. Seroprevalence of SARS-CoV-2 in the Norwegian population measured in residual sera collected in April/May 2020 and August 2019. Oslo, Norway: Norwegian Institute of Public Health, 2020.                                                                                                                                                                                                                                                                                                                                                                                                                                                                 |
| Norway             | Tunheim G., Kran, AB., Rø, G., Hungnes O., Lund-Johansen, F., Tran, T., Andersen JT., Vaage, JT. "Seroprevalence of SARS-CoV-2 in the Norwegian population measured in residual sera collected in late summer 2020". [Seroprevalens av SARS-CoV-2 i den norske befolkningen, målt i restsera samlet inn på sensommeren 2020] Report 2020. Oslo: Norwegian Institute of Public Health, 2020.                                                                                                                                                                                                                                                                                                     |
| Portugal           | Ministry of Health (Portugal). Portugal National Serological Survey COVID-19 Preliminary results 2020. Lisbon, Portugal: Ministry of Health (Portugal), 2020.                                                                                                                                                                                                                                                                                                                                                                                                                                                                                                                                   |
| Puerto Rico        | Centers for Disease Control and Prevention (CDC). CDC COVID Data Tracker Commercial Laboratory Seroprevalence Survey Data. Atlanta, United States of America: Centers for Disease Control and Prevention (CDC).                                                                                                                                                                                                                                                                                                                                                                                                                                                                                 |
| Puerto Rico        | Jones JM, Stone M, Sulaeman H, Fink RV, Dave H, Levy ME, Di Germanio C, Green V, Notari E, Saa P, Biggerstaff BJ, Strauss D, Kessler D, Vassallo R, Reik R, Rossmann S, Destree M, Nguyen KA, Sayers M, Lough C, Bougie DW, Ritter M, Latoni G, Weales B, Sime S, Gorlin J, Brown NE, Gould CV, Berney K, Benoit TJ, Miller MJ, Freeman D, Kartik D, Fry AM, Azziz-Baumgartner E, Hall AJ, MacNeil A, Gundlapalli AV, Basavaraju SV, Gerber SI, Patton ME, Custer B, Williamson P, Simmons G, Thornburg NJ, Kleinman S, Stramer SL, Opsomer J, Busch MP. Estimated US Infection- and Vaccine-Induced SARS-CoV-2 Seroprevalence Based on Blood Donations, July 2020-May 2021. <i>JAMA.</i> 2021. |
| Qatar              | Abu-Raddad LJ, Chemaitelly H, Ayoub HH, Al Kanaani Z, Al Khal A, Al Kuwari E, Butt AA, Coyle P, Jeremijenko A, Kaleeckal AH, Latif AN, Owen RC, Rahim HFA, Al Abdulla SA, Al Kuwari MG, Kandy MC, Saeb H, Ahmed SNN, Al Romaihi HE, Bansal D, Dalton L, Al-Thani MH, Bertollini R. Characterizing the Qatar advanced-phase SARS-CoV-2 epidemic. <i>Sci Rep.</i> 2021; 11(1): 6233.                                                                                                                                                                                                                                                                                                              |
| Spain              | Government of Spain, Institute of Health Carlos III (Spain). Spain - National Study of Sero-epidemiology of Infection by Sars-Cov-2.                                                                                                                                                                                                                                                                                                                                                                                                                                                                                                                                                            |
| Spain, Andalusia   | Government of Spain, Institute of Health Carlos III (Spain). Spain - National Study of Sero-epidemiology of Infection by Sars-Cov-2.                                                                                                                                                                                                                                                                                                                                                                                                                                                                                                                                                            |
| Spain, Aragon      | Government of Spain, Institute of Health Carlos III (Spain). Spain - National Study of Sero-epidemiology of Infection by Sars-Cov-2.                                                                                                                                                                                                                                                                                                                                                                                                                                                                                                                                                            |
| Spain, Asturias    | Government of Spain, Institute of Health Carlos III (Spain). Spain - National Study of Sero-epidemiology of Infection by Sars-Cov-2.                                                                                                                                                                                                                                                                                                                                                                                                                                                                                                                                                            |



|                         |                                                                                                                                                                                                                                                                                                                                                                                                                                                                                                                                                                                                                                                                                                 |
|-------------------------|-------------------------------------------------------------------------------------------------------------------------------------------------------------------------------------------------------------------------------------------------------------------------------------------------------------------------------------------------------------------------------------------------------------------------------------------------------------------------------------------------------------------------------------------------------------------------------------------------------------------------------------------------------------------------------------------------|
| Spain, Balearic Islands | Government of Spain, Institute of Health Carlos III (Spain). Spain - National Study of Sero-epidemiology of Infection by Sars-Cov-2.                                                                                                                                                                                                                                                                                                                                                                                                                                                                                                                                                            |
| Spain, Canary Islands   | Government of Spain, Institute of Health Carlos III (Spain). Spain - National Study of Sero-epidemiology of Infection by Sars-Cov-2.                                                                                                                                                                                                                                                                                                                                                                                                                                                                                                                                                            |
| Spain, Cantabria        | Iruzubieta P, Fernández-Lanas T, Rasines L, Cayon L, Álvarez-Cancelo A, Santos-Laso A, García-Blanco A, Curiel-Olmo S, Cabezas J, Wallmann R, Fábrega E, Martínez-Taboada VM, Hernández JL, López-Hoyos M, Lazarus JV, Crespo J. Feasibility of large-scale population testing for SARS-CoV-2 detection by self-testing at home. <i>Sci Rep.</i> 2021; 11(1): 9819.                                                                                                                                                                                                                                                                                                                             |
| Sweden                  | Public Health Agency of Sweden. Detection of Antibodies After Review of Covid-19 in Blood Donors (Sub-report 2). Östersund, Sweden: Public Health Agency of Sweden.                                                                                                                                                                                                                                                                                                                                                                                                                                                                                                                             |
| UK, England             | National Health Service (United Kingdom), Public Health England. United Kingdom - England Weekly National COVID-19 Surveillance Report. London, United Kingdom: Government of the United Kingdom.                                                                                                                                                                                                                                                                                                                                                                                                                                                                                               |
| UK, England             | Ward H, Atchison CJ, Whitaker M, Ainslie KEC, Elliott J, Okell LC, Redd R, Ashby D, Donnelly CA, Barclay W, Darzi A, Cooke G, Riley S, Elliott P. Antibody prevalence for SARS-CoV-2 in England following first peak of the pandemic: REACT2 study in 100,000 adults. Preprint. medRxiv. 2020.                                                                                                                                                                                                                                                                                                                                                                                                  |
| UK, England             | Office for National Statistics (ONS) (United Kingdom). United Kingdom Coronavirus (COVID-19) Infection Survey. Newport, United Kingdom: Office for National Statistics (ONS) (United Kingdom), 2020.                                                                                                                                                                                                                                                                                                                                                                                                                                                                                            |
| UK, England             | Ward H, Cooke G, Atchison C, Whitaker M, Elliott J, Moshe M, Brown JC, Flower B, Daunt A, Ainslie K, Ashby D, Donnelly C, Riley S, Darzi A, Barclay W, Elliott P, for the React study team. Declining prevalence of antibody positivity to SARS-CoV-2: a community study of 365,000 adults. Preprint. medRxiv. 2020.                                                                                                                                                                                                                                                                                                                                                                            |
| UK, England             | Office for National Statistics (ONS) (United Kingdom). England - Coronavirus (COVID-19) Infection Survey: Antibody Data, January 2021. Newport, United Kingdom: Office for National Statistics (ONS) (United Kingdom), 2021.                                                                                                                                                                                                                                                                                                                                                                                                                                                                    |
| UK, Scotland            | Public Health Scotland, Scottish National Blood Transfusion Service (SNBTS), The Centre for Virus Research (CVR) at the University of Glasgow. Scotland Enhanced Surveillance of Covid-19 Dashboard. Edinburgh, Scotland: Public Health Scotland.                                                                                                                                                                                                                                                                                                                                                                                                                                               |
| UK, Scotland            | Office for National Statistics (ONS) (United Kingdom). England - Coronavirus (COVID-19) Infection Survey: Antibody Data, January 2021. Newport, United Kingdom: Office for National Statistics (ONS) (United Kingdom), 2021.                                                                                                                                                                                                                                                                                                                                                                                                                                                                    |
| UK, Wales               | Office for National Statistics (ONS) (United Kingdom). England - Coronavirus (COVID-19) Infection Survey: Antibody Data, January 2021. Newport, United Kingdom: Office for National Statistics (ONS) (United Kingdom), 2021.                                                                                                                                                                                                                                                                                                                                                                                                                                                                    |
| USA, Alabama            | Centers for Disease Control and Prevention (CDC). CDC COVID Data Tracker Commercial Laboratory Seroprevalence Survey Data. Atlanta, United States of America: Centers for Disease Control and Prevention (CDC).                                                                                                                                                                                                                                                                                                                                                                                                                                                                                 |
| USA, Alabama            | Jones JM, Stone M, Sulaeman H, Fink RV, Dave H, Levy ME, Di Germanio C, Green V, Notari E, Saa P, Biggerstaff BJ, Strauss D, Kessler D, Vassallo R, Reik R, Rossmann S, Destree M, Nguyen KA, Sayers M, Lough C, Bougie DW, Ritter M, Latoni G, Weales B, Sime S, Gorlin J, Brown NE, Gould CV, Berney K, Benoit TJ, Miller MJ, Freeman D, Kartik D, Fry AM, Azziz-Baumgartner E, Hall AJ, MacNeil A, Gundlapalli AV, Basavaraju SV, Gerber SI, Patton ME, Custer B, Williamson P, Simmons G, Thornburg NJ, Kleinman S, Stramer SL, Opsomer J, Busch MP. Estimated US Infection- and Vaccine-Induced SARS-CoV-2 Seroprevalence Based on Blood Donations, July 2020-May 2021. <i>JAMA.</i> 2021. |
| USA, Alaska             | Centers for Disease Control and Prevention (CDC). CDC COVID Data Tracker Commercial Laboratory Seroprevalence Survey Data. Atlanta, United States of America: Centers for Disease Control and Prevention (CDC).                                                                                                                                                                                                                                                                                                                                                                                                                                                                                 |

|                  |                                                                                                                                                                                                                                                                                                                                                                                                                                                                                                                                                                                                                                                                                          |
|------------------|------------------------------------------------------------------------------------------------------------------------------------------------------------------------------------------------------------------------------------------------------------------------------------------------------------------------------------------------------------------------------------------------------------------------------------------------------------------------------------------------------------------------------------------------------------------------------------------------------------------------------------------------------------------------------------------|
| USA, Alaska      | Jones JM, Stone M, Sulaeman H, Fink RV, Dave H, Levy ME, Di Germanio C, Green V, Notari E, Saa P, Biggerstaff BJ, Strauss D, Kessler D, Vassallo R, Reik R, Rossmann S, Destree M, Nguyen KA, Sayers M, Lough C, Bougie DW, Ritter M, Latoni G, Weales B, Sime S, Gorlin J, Brown NE, Gould CV, Berney K, Benoit TJ, Miller MJ, Freeman D, Kartik D, Fry AM, Azziz-Baumgartner E, Hall AJ, MacNeil A, Gundlapalli AV, Basavaraju SV, Gerber SI, Patton ME, Custer B, Williamson P, Simmons G, Thornburg NJ, Kleinman S, Stramer SL, Opsomer J, Busch MP. Estimated US Infection- and Vaccine-Induced SARS-CoV-2 Seroprevalence Based on Blood Donations, July 2020-May 2021. JAMA. 2021. |
| USA, Arizona     | Centers for Disease Control and Prevention (CDC). CDC COVID Data Tracker Commercial Laboratory Seroprevalence Survey Data. Atlanta, United States of America: Centers for Disease Control and Prevention (CDC).                                                                                                                                                                                                                                                                                                                                                                                                                                                                          |
| USA, Arkansas    | Centers for Disease Control and Prevention (CDC). CDC COVID Data Tracker Commercial Laboratory Seroprevalence Survey Data. Atlanta, United States of America: Centers for Disease Control and Prevention (CDC).                                                                                                                                                                                                                                                                                                                                                                                                                                                                          |
| USA, California  | Centers for Disease Control and Prevention (CDC). CDC COVID Data Tracker Commercial Laboratory Seroprevalence Survey Data. Atlanta, United States of America: Centers for Disease Control and Prevention (CDC).                                                                                                                                                                                                                                                                                                                                                                                                                                                                          |
| USA, Colorado    | Centers for Disease Control and Prevention (CDC). CDC COVID Data Tracker Commercial Laboratory Seroprevalence Survey Data. Atlanta, United States of America: Centers for Disease Control and Prevention (CDC).                                                                                                                                                                                                                                                                                                                                                                                                                                                                          |
| USA, Colorado    | Jones JM, Stone M, Sulaeman H, Fink RV, Dave H, Levy ME, Di Germanio C, Green V, Notari E, Saa P, Biggerstaff BJ, Strauss D, Kessler D, Vassallo R, Reik R, Rossmann S, Destree M, Nguyen KA, Sayers M, Lough C, Bougie DW, Ritter M, Latoni G, Weales B, Sime S, Gorlin J, Brown NE, Gould CV, Berney K, Benoit TJ, Miller MJ, Freeman D, Kartik D, Fry AM, Azziz-Baumgartner E, Hall AJ, MacNeil A, Gundlapalli AV, Basavaraju SV, Gerber SI, Patton ME, Custer B, Williamson P, Simmons G, Thornburg NJ, Kleinman S, Stramer SL, Opsomer J, Busch MP. Estimated US Infection- and Vaccine-Induced SARS-CoV-2 Seroprevalence Based on Blood Donations, July 2020-May 2021. JAMA. 2021. |
| USA, Connecticut | Havers FP, Reed C, Lim T, Montgomery JM, Klana JD, Hall AJ, Fry AM, Cannon DL, Chiang CF, Gibbons A, Krapivunaya I, Morales-Betoulle M, Roguski K, Rasheed MAU, Freeman B, Lester S, Mills L, Carroll DS, Owen SM, Johnson JA, Semenova V, Blackmore C, Blog D, Chai SJ, Dunn A, Hand J, Jain S, Lindquist S, Lynfield R, Pritchard S, Sokol T, Sosa L, Turabelidze G, Watkins SM, Wiesman J, Williams RW, Yendell S, Schiffer J, Thornburg NJ. Seroprevalence of Antibodies to SARS-CoV-2 in 10 Sites in the United States, March 23-May 12, 2020. JAMA Intern Med. 2020.                                                                                                               |
| USA, Connecticut | Centers for Disease Control and Prevention (CDC). CDC COVID Data Tracker Commercial Laboratory Seroprevalence Survey Data. Atlanta, United States of America: Centers for Disease Control and Prevention (CDC).                                                                                                                                                                                                                                                                                                                                                                                                                                                                          |
| USA, Connecticut | Jones JM, Stone M, Sulaeman H, Fink RV, Dave H, Levy ME, Di Germanio C, Green V, Notari E, Saa P, Biggerstaff BJ, Strauss D, Kessler D, Vassallo R, Reik R, Rossmann S, Destree M, Nguyen KA, Sayers M, Lough C, Bougie DW, Ritter M, Latoni G, Weales B, Sime S, Gorlin J, Brown NE, Gould CV, Berney K, Benoit TJ, Miller MJ, Freeman D, Kartik D, Fry AM, Azziz-Baumgartner E, Hall AJ, MacNeil A, Gundlapalli AV, Basavaraju SV, Gerber SI, Patton ME, Custer B, Williamson P, Simmons G, Thornburg NJ, Kleinman S, Stramer SL, Opsomer J, Busch MP. Estimated US Infection- and Vaccine-Induced SARS-CoV-2 Seroprevalence Based on Blood Donations, July 2020-May 2021. JAMA. 2021. |
| USA, Delaware    | Centers for Disease Control and Prevention (CDC). CDC COVID Data Tracker Commercial Laboratory Seroprevalence Survey Data. Atlanta, United States of America: Centers for Disease Control and Prevention (CDC).                                                                                                                                                                                                                                                                                                                                                                                                                                                                          |
| USA, Georgia     | Centers for Disease Control and Prevention (CDC). CDC COVID Data Tracker Commercial Laboratory Seroprevalence Survey Data. Atlanta, United States of America: Centers for Disease Control and Prevention (CDC).                                                                                                                                                                                                                                                                                                                                                                                                                                                                          |

|               |                                                                                                                                                                                                                                                                                                                                                                                                                                                                                                                                                                                                                                                                                          |
|---------------|------------------------------------------------------------------------------------------------------------------------------------------------------------------------------------------------------------------------------------------------------------------------------------------------------------------------------------------------------------------------------------------------------------------------------------------------------------------------------------------------------------------------------------------------------------------------------------------------------------------------------------------------------------------------------------------|
| USA, Georgia  | Jones JM, Stone M, Sulaeman H, Fink RV, Dave H, Levy ME, Di Germanio C, Green V, Notari E, Saa P, Biggerstaff BJ, Strauss D, Kessler D, Vassallo R, Reik R, Rossmann S, Destree M, Nguyen KA, Sayers M, Lough C, Bougie DW, Ritter M, Latoni G, Weales B, Sime S, Gorlin J, Brown NE, Gould CV, Berney K, Benoit TJ, Miller MJ, Freeman D, Kartik D, Fry AM, Azziz-Baumgartner E, Hall AJ, MacNeil A, Gundlapalli AV, Basavaraju SV, Gerber SI, Patton ME, Custer B, Williamson P, Simmons G, Thornburg NJ, Kleinman S, Stramer SL, Opsomer J, Busch MP. Estimated US Infection- and Vaccine-Induced SARS-CoV-2 Seroprevalence Based on Blood Donations, July 2020-May 2021. JAMA. 2021. |
| USA, Hawaii   | Centers for Disease Control and Prevention (CDC). CDC COVID Data Tracker Commercial Laboratory Seroprevalence Survey Data. Atlanta, United States of America: Centers for Disease Control and Prevention (CDC).                                                                                                                                                                                                                                                                                                                                                                                                                                                                          |
| USA, Hawaii   | Jones JM, Stone M, Sulaeman H, Fink RV, Dave H, Levy ME, Di Germanio C, Green V, Notari E, Saa P, Biggerstaff BJ, Strauss D, Kessler D, Vassallo R, Reik R, Rossmann S, Destree M, Nguyen KA, Sayers M, Lough C, Bougie DW, Ritter M, Latoni G, Weales B, Sime S, Gorlin J, Brown NE, Gould CV, Berney K, Benoit TJ, Miller MJ, Freeman D, Kartik D, Fry AM, Azziz-Baumgartner E, Hall AJ, MacNeil A, Gundlapalli AV, Basavaraju SV, Gerber SI, Patton ME, Custer B, Williamson P, Simmons G, Thornburg NJ, Kleinman S, Stramer SL, Opsomer J, Busch MP. Estimated US Infection- and Vaccine-Induced SARS-CoV-2 Seroprevalence Based on Blood Donations, July 2020-May 2021. JAMA. 2021. |
| USA, Idaho    | Centers for Disease Control and Prevention (CDC). CDC COVID Data Tracker Commercial Laboratory Seroprevalence Survey Data. Atlanta, United States of America: Centers for Disease Control and Prevention (CDC).                                                                                                                                                                                                                                                                                                                                                                                                                                                                          |
| USA, Idaho    | Jones JM, Stone M, Sulaeman H, Fink RV, Dave H, Levy ME, Di Germanio C, Green V, Notari E, Saa P, Biggerstaff BJ, Strauss D, Kessler D, Vassallo R, Reik R, Rossmann S, Destree M, Nguyen KA, Sayers M, Lough C, Bougie DW, Ritter M, Latoni G, Weales B, Sime S, Gorlin J, Brown NE, Gould CV, Berney K, Benoit TJ, Miller MJ, Freeman D, Kartik D, Fry AM, Azziz-Baumgartner E, Hall AJ, MacNeil A, Gundlapalli AV, Basavaraju SV, Gerber SI, Patton ME, Custer B, Williamson P, Simmons G, Thornburg NJ, Kleinman S, Stramer SL, Opsomer J, Busch MP. Estimated US Infection- and Vaccine-Induced SARS-CoV-2 Seroprevalence Based on Blood Donations, July 2020-May 2021. JAMA. 2021. |
| USA, Illinois | Centers for Disease Control and Prevention (CDC). CDC COVID Data Tracker Commercial Laboratory Seroprevalence Survey Data. Atlanta, United States of America: Centers for Disease Control and Prevention (CDC).                                                                                                                                                                                                                                                                                                                                                                                                                                                                          |
| USA, Indiana  | Menachemi N, Yiannoutsos CT, Dixon BE, Duszynski TJ, Fadel WF, Wools-Kaloustian KK, Unruh Needleman N, Box K, Caine V, Norwood C, Weaver L, Halverson PK. Population Point Prevalence of SARS-CoV-2 Infection Based on a Statewide Random Sample - Indiana, April 25-29, 2020. MMWR Morb Mortal Wkly Rep. 2020; 69(29): 960-964.                                                                                                                                                                                                                                                                                                                                                         |
| USA, Indiana  | Centers for Disease Control and Prevention (CDC). CDC COVID Data Tracker Commercial Laboratory Seroprevalence Survey Data. Atlanta, United States of America: Centers for Disease Control and Prevention (CDC).                                                                                                                                                                                                                                                                                                                                                                                                                                                                          |
| USA, Indiana  | Jones JM, Stone M, Sulaeman H, Fink RV, Dave H, Levy ME, Di Germanio C, Green V, Notari E, Saa P, Biggerstaff BJ, Strauss D, Kessler D, Vassallo R, Reik R, Rossmann S, Destree M, Nguyen KA, Sayers M, Lough C, Bougie DW, Ritter M, Latoni G, Weales B, Sime S, Gorlin J, Brown NE, Gould CV, Berney K, Benoit TJ, Miller MJ, Freeman D, Kartik D, Fry AM, Azziz-Baumgartner E, Hall AJ, MacNeil A, Gundlapalli AV, Basavaraju SV, Gerber SI, Patton ME, Custer B, Williamson P, Simmons G, Thornburg NJ, Kleinman S, Stramer SL, Opsomer J, Busch MP. Estimated US Infection- and Vaccine-Induced SARS-CoV-2 Seroprevalence Based on Blood Donations, July 2020-May 2021. JAMA. 2021. |
| USA, Iowa     | Centers for Disease Control and Prevention (CDC). CDC COVID Data Tracker Commercial Laboratory Seroprevalence Survey Data. Atlanta, United States of America: Centers for Disease Control and Prevention (CDC).                                                                                                                                                                                                                                                                                                                                                                                                                                                                          |

|                    |                                                                                                                                                                                                                                                                                                                                                                                                                                                                                                                                                                                                                                                                                          |
|--------------------|------------------------------------------------------------------------------------------------------------------------------------------------------------------------------------------------------------------------------------------------------------------------------------------------------------------------------------------------------------------------------------------------------------------------------------------------------------------------------------------------------------------------------------------------------------------------------------------------------------------------------------------------------------------------------------------|
| USA, Iowa          | Jones JM, Stone M, Sulaeman H, Fink RV, Dave H, Levy ME, Di Germanio C, Green V, Notari E, Saa P, Biggerstaff BJ, Strauss D, Kessler D, Vassallo R, Reik R, Rossmann S, Destree M, Nguyen KA, Sayers M, Lough C, Bougie DW, Ritter M, Latoni G, Weales B, Sime S, Gorlin J, Brown NE, Gould CV, Berney K, Benoit TJ, Miller MJ, Freeman D, Kartik D, Fry AM, Azziz-Baumgartner E, Hall AJ, MacNeil A, Gundlapalli AV, Basavaraju SV, Gerber SI, Patton ME, Custer B, Williamson P, Simmons G, Thornburg NJ, Kleinman S, Stramer SL, Opsomer J, Busch MP. Estimated US Infection- and Vaccine-Induced SARS-CoV-2 Seroprevalence Based on Blood Donations, July 2020-May 2021. JAMA. 2021. |
| USA, Kansas        | Centers for Disease Control and Prevention (CDC). CDC COVID Data Tracker Commercial Laboratory Seroprevalence Survey Data. Atlanta, United States of America: Centers for Disease Control and Prevention (CDC).                                                                                                                                                                                                                                                                                                                                                                                                                                                                          |
| USA, Kentucky      | Centers for Disease Control and Prevention (CDC). CDC COVID Data Tracker Commercial Laboratory Seroprevalence Survey Data. Atlanta, United States of America: Centers for Disease Control and Prevention (CDC).                                                                                                                                                                                                                                                                                                                                                                                                                                                                          |
| USA, Louisiana     | Havers FP, Reed C, Lim T, Montgomery JM, Klena JD, Hall AJ, Fry AM, Cannon DL, Chiang CF, Gibbons A, Krapivunaya I, Morales-Betoulle M, Roguski K, Rasheed MAU, Freeman B, Lester S, Mills L, Carroll DS, Owen SM, Johnson JA, Semenova V, Blackmore C, Blog D, Chai SJ, Dunn A, Hand J, Jain S, Lindquist S, Lynfield R, Pritchard S, Sokol T, Sosa L, Turabelidze G, Watkins SM, Wiesman J, Williams RW, Yendell S, Schiffer J, Thornburg NJ. Seroprevalence of Antibodies to SARS-CoV-2 in 10 Sites in the United States, March 23-May 12, 2020. JAMA Intern Med. 2020.                                                                                                               |
| USA, Louisiana     | Centers for Disease Control and Prevention (CDC). CDC COVID Data Tracker Commercial Laboratory Seroprevalence Survey Data. Atlanta, United States of America: Centers for Disease Control and Prevention (CDC).                                                                                                                                                                                                                                                                                                                                                                                                                                                                          |
| USA, Louisiana     | Jones JM, Stone M, Sulaeman H, Fink RV, Dave H, Levy ME, Di Germanio C, Green V, Notari E, Saa P, Biggerstaff BJ, Strauss D, Kessler D, Vassallo R, Reik R, Rossmann S, Destree M, Nguyen KA, Sayers M, Lough C, Bougie DW, Ritter M, Latoni G, Weales B, Sime S, Gorlin J, Brown NE, Gould CV, Berney K, Benoit TJ, Miller MJ, Freeman D, Kartik D, Fry AM, Azziz-Baumgartner E, Hall AJ, MacNeil A, Gundlapalli AV, Basavaraju SV, Gerber SI, Patton ME, Custer B, Williamson P, Simmons G, Thornburg NJ, Kleinman S, Stramer SL, Opsomer J, Busch MP. Estimated US Infection- and Vaccine-Induced SARS-CoV-2 Seroprevalence Based on Blood Donations, July 2020-May 2021. JAMA. 2021. |
| USA, Maine         | Centers for Disease Control and Prevention (CDC). CDC COVID Data Tracker Commercial Laboratory Seroprevalence Survey Data. Atlanta, United States of America: Centers for Disease Control and Prevention (CDC).                                                                                                                                                                                                                                                                                                                                                                                                                                                                          |
| USA, Maine         | Jones JM, Stone M, Sulaeman H, Fink RV, Dave H, Levy ME, Di Germanio C, Green V, Notari E, Saa P, Biggerstaff BJ, Strauss D, Kessler D, Vassallo R, Reik R, Rossmann S, Destree M, Nguyen KA, Sayers M, Lough C, Bougie DW, Ritter M, Latoni G, Weales B, Sime S, Gorlin J, Brown NE, Gould CV, Berney K, Benoit TJ, Miller MJ, Freeman D, Kartik D, Fry AM, Azziz-Baumgartner E, Hall AJ, MacNeil A, Gundlapalli AV, Basavaraju SV, Gerber SI, Patton ME, Custer B, Williamson P, Simmons G, Thornburg NJ, Kleinman S, Stramer SL, Opsomer J, Busch MP. Estimated US Infection- and Vaccine-Induced SARS-CoV-2 Seroprevalence Based on Blood Donations, July 2020-May 2021. JAMA. 2021. |
| USA, Maryland      | Centers for Disease Control and Prevention (CDC). CDC COVID Data Tracker Commercial Laboratory Seroprevalence Survey Data. Atlanta, United States of America: Centers for Disease Control and Prevention (CDC).                                                                                                                                                                                                                                                                                                                                                                                                                                                                          |
| USA, Massachusetts | Centers for Disease Control and Prevention (CDC). CDC COVID Data Tracker Commercial Laboratory Seroprevalence Survey Data. Atlanta, United States of America: Centers for Disease Control and Prevention (CDC).                                                                                                                                                                                                                                                                                                                                                                                                                                                                          |

|                    |                                                                                                                                                                                                                                                                                                                                                                                                                                                                                                                                                                                                                                                                                          |
|--------------------|------------------------------------------------------------------------------------------------------------------------------------------------------------------------------------------------------------------------------------------------------------------------------------------------------------------------------------------------------------------------------------------------------------------------------------------------------------------------------------------------------------------------------------------------------------------------------------------------------------------------------------------------------------------------------------------|
| USA, Massachusetts | Jones JM, Stone M, Sulaeman H, Fink RV, Dave H, Levy ME, Di Germanio C, Green V, Notari E, Saa P, Biggerstaff BJ, Strauss D, Kessler D, Vassallo R, Reik R, Rossmann S, Destree M, Nguyen KA, Sayers M, Lough C, Bougie DW, Ritter M, Latoni G, Weales B, Sime S, Gorlin J, Brown NE, Gould CV, Berney K, Benoit TJ, Miller MJ, Freeman D, Kartik D, Fry AM, Azziz-Baumgartner E, Hall AJ, MacNeil A, Gundlapalli AV, Basavaraju SV, Gerber SI, Patton ME, Custer B, Williamson P, Simmons G, Thornburg NJ, Kleinman S, Stramer SL, Opsomer J, Busch MP. Estimated US Infection- and Vaccine-Induced SARS-CoV-2 Seroprevalence Based on Blood Donations, July 2020-May 2021. JAMA. 2021. |
| USA, Michigan      | Centers for Disease Control and Prevention (CDC). CDC COVID Data Tracker Commercial Laboratory Seroprevalence Survey Data. Atlanta, United States of America: Centers for Disease Control and Prevention (CDC).                                                                                                                                                                                                                                                                                                                                                                                                                                                                          |
| USA, Michigan      | Jones JM, Stone M, Sulaeman H, Fink RV, Dave H, Levy ME, Di Germanio C, Green V, Notari E, Saa P, Biggerstaff BJ, Strauss D, Kessler D, Vassallo R, Reik R, Rossmann S, Destree M, Nguyen KA, Sayers M, Lough C, Bougie DW, Ritter M, Latoni G, Weales B, Sime S, Gorlin J, Brown NE, Gould CV, Berney K, Benoit TJ, Miller MJ, Freeman D, Kartik D, Fry AM, Azziz-Baumgartner E, Hall AJ, MacNeil A, Gundlapalli AV, Basavaraju SV, Gerber SI, Patton ME, Custer B, Williamson P, Simmons G, Thornburg NJ, Kleinman S, Stramer SL, Opsomer J, Busch MP. Estimated US Infection- and Vaccine-Induced SARS-CoV-2 Seroprevalence Based on Blood Donations, July 2020-May 2021. JAMA. 2021. |
| USA, Minnesota     | Centers for Disease Control and Prevention (CDC). CDC COVID Data Tracker Commercial Laboratory Seroprevalence Survey Data. Atlanta, United States of America: Centers for Disease Control and Prevention (CDC).                                                                                                                                                                                                                                                                                                                                                                                                                                                                          |
| USA, Mississippi   | Centers for Disease Control and Prevention (CDC). CDC COVID Data Tracker Commercial Laboratory Seroprevalence Survey Data. Atlanta, United States of America: Centers for Disease Control and Prevention (CDC).                                                                                                                                                                                                                                                                                                                                                                                                                                                                          |
| USA, Mississippi   | Jones JM, Stone M, Sulaeman H, Fink RV, Dave H, Levy ME, Di Germanio C, Green V, Notari E, Saa P, Biggerstaff BJ, Strauss D, Kessler D, Vassallo R, Reik R, Rossmann S, Destree M, Nguyen KA, Sayers M, Lough C, Bougie DW, Ritter M, Latoni G, Weales B, Sime S, Gorlin J, Brown NE, Gould CV, Berney K, Benoit TJ, Miller MJ, Freeman D, Kartik D, Fry AM, Azziz-Baumgartner E, Hall AJ, MacNeil A, Gundlapalli AV, Basavaraju SV, Gerber SI, Patton ME, Custer B, Williamson P, Simmons G, Thornburg NJ, Kleinman S, Stramer SL, Opsomer J, Busch MP. Estimated US Infection- and Vaccine-Induced SARS-CoV-2 Seroprevalence Based on Blood Donations, July 2020-May 2021. JAMA. 2021. |
| USA, Missouri      | Havers FP, Reed C, Lim T, Montgomery JM, Klana JD, Hall AJ, Fry AM, Cannon DL, Chiang CF, Gibbons A, Krapipunaya I, Morales-Betoulle M, Roguski K, Rasheed MAU, Freeman B, Lester S, Mills L, Carroll DS, Owen SM, Johnson JA, Semenova V, Blackmore C, Blog D, Chai SJ, Dunn A, Hand J, Jain S, Lindquist S, Lynfield R, Pritchard S, Sokol T, Sosa L, Turabelidze G, Watkins SM, Wiesman J, Williams RW, Yendell S, Schiffer J, Thornburg NJ. Seroprevalence of Antibodies to SARS-CoV-2 in 10 Sites in the United States, March 23-May 12, 2020. JAMA Intern Med. 2020.                                                                                                               |
| USA, Missouri      | Centers for Disease Control and Prevention (CDC). CDC COVID Data Tracker Commercial Laboratory Seroprevalence Survey Data. Atlanta, United States of America: Centers for Disease Control and Prevention (CDC).                                                                                                                                                                                                                                                                                                                                                                                                                                                                          |
| USA, Montana       | Centers for Disease Control and Prevention (CDC). CDC COVID Data Tracker Commercial Laboratory Seroprevalence Survey Data. Atlanta, United States of America: Centers for Disease Control and Prevention (CDC).                                                                                                                                                                                                                                                                                                                                                                                                                                                                          |
| USA, Montana       | Jones JM, Stone M, Sulaeman H, Fink RV, Dave H, Levy ME, Di Germanio C, Green V, Notari E, Saa P, Biggerstaff BJ, Strauss D, Kessler D, Vassallo R, Reik R, Rossmann S, Destree M, Nguyen KA, Sayers M, Lough C, Bougie DW, Ritter M, Latoni G, Weales B, Sime S, Gorlin J, Brown NE, Gould CV, Berney K, Benoit TJ, Miller MJ, Freeman D, Kartik D, Fry AM, Azziz-Baumgartner E, Hall AJ, MacNeil A, Gundlapalli AV, Basavaraju SV, Gerber SI, Patton ME, Custer B, Williamson P, Simmons G, Thornburg NJ, Kleinman S, Stramer SL, Opsomer J, Busch MP. Estimated US Infection- and Vaccine-Induced SARS-CoV-2 Seroprevalence Based on Blood Donations, July 2020-May 2021. JAMA. 2021. |

|                     |                                                                                                                                                                                                                                                                                                                                                                                                                                                                                                                                                                                                                                                                                          |
|---------------------|------------------------------------------------------------------------------------------------------------------------------------------------------------------------------------------------------------------------------------------------------------------------------------------------------------------------------------------------------------------------------------------------------------------------------------------------------------------------------------------------------------------------------------------------------------------------------------------------------------------------------------------------------------------------------------------|
| USA, Nebraska       | Centers for Disease Control and Prevention (CDC). CDC COVID Data Tracker Commercial Laboratory Seroprevalence Survey Data. Atlanta, United States of America: Centers for Disease Control and Prevention (CDC).                                                                                                                                                                                                                                                                                                                                                                                                                                                                          |
| USA, Nebraska       | Jones JM, Stone M, Sulaeman H, Fink RV, Dave H, Levy ME, Di Germanio C, Green V, Notari E, Saa P, Biggerstaff BJ, Strauss D, Kessler D, Vassallo R, Reik R, Rossmann S, Destree M, Nguyen KA, Sayers M, Lough C, Bougie DW, Ritter M, Latoni G, Weales B, Sime S, Gorlin J, Brown NE, Gould CV, Berney K, Benoit TJ, Miller MJ, Freeman D, Kartik D, Fry AM, Azziz-Baumgartner E, Hall AJ, MacNeil A, Gundlapalli AV, Basavaraju SV, Gerber SI, Patton ME, Custer B, Williamson P, Simmons G, Thornburg NJ, Kleinman S, Stramer SL, Opsomer J, Busch MP. Estimated US Infection- and Vaccine-Induced SARS-CoV-2 Seroprevalence Based on Blood Donations, July 2020-May 2021. JAMA. 2021. |
| USA, Nevada         | Centers for Disease Control and Prevention (CDC). CDC COVID Data Tracker Commercial Laboratory Seroprevalence Survey Data. Atlanta, United States of America: Centers for Disease Control and Prevention (CDC).                                                                                                                                                                                                                                                                                                                                                                                                                                                                          |
| USA, Nevada         | Jones JM, Stone M, Sulaeman H, Fink RV, Dave H, Levy ME, Di Germanio C, Green V, Notari E, Saa P, Biggerstaff BJ, Strauss D, Kessler D, Vassallo R, Reik R, Rossmann S, Destree M, Nguyen KA, Sayers M, Lough C, Bougie DW, Ritter M, Latoni G, Weales B, Sime S, Gorlin J, Brown NE, Gould CV, Berney K, Benoit TJ, Miller MJ, Freeman D, Kartik D, Fry AM, Azziz-Baumgartner E, Hall AJ, MacNeil A, Gundlapalli AV, Basavaraju SV, Gerber SI, Patton ME, Custer B, Williamson P, Simmons G, Thornburg NJ, Kleinman S, Stramer SL, Opsomer J, Busch MP. Estimated US Infection- and Vaccine-Induced SARS-CoV-2 Seroprevalence Based on Blood Donations, July 2020-May 2021. JAMA. 2021. |
| USA, New Hampshire  | Centers for Disease Control and Prevention (CDC). CDC COVID Data Tracker Commercial Laboratory Seroprevalence Survey Data. Atlanta, United States of America: Centers for Disease Control and Prevention (CDC).                                                                                                                                                                                                                                                                                                                                                                                                                                                                          |
| USA, New Hampshire  | Jones JM, Stone M, Sulaeman H, Fink RV, Dave H, Levy ME, Di Germanio C, Green V, Notari E, Saa P, Biggerstaff BJ, Strauss D, Kessler D, Vassallo R, Reik R, Rossmann S, Destree M, Nguyen KA, Sayers M, Lough C, Bougie DW, Ritter M, Latoni G, Weales B, Sime S, Gorlin J, Brown NE, Gould CV, Berney K, Benoit TJ, Miller MJ, Freeman D, Kartik D, Fry AM, Azziz-Baumgartner E, Hall AJ, MacNeil A, Gundlapalli AV, Basavaraju SV, Gerber SI, Patton ME, Custer B, Williamson P, Simmons G, Thornburg NJ, Kleinman S, Stramer SL, Opsomer J, Busch MP. Estimated US Infection- and Vaccine-Induced SARS-CoV-2 Seroprevalence Based on Blood Donations, July 2020-May 2021. JAMA. 2021. |
| USA, New Jersey     | Centers for Disease Control and Prevention (CDC). CDC COVID Data Tracker Commercial Laboratory Seroprevalence Survey Data. Atlanta, United States of America: Centers for Disease Control and Prevention (CDC).                                                                                                                                                                                                                                                                                                                                                                                                                                                                          |
| USA, New Mexico     | Centers for Disease Control and Prevention (CDC). CDC COVID Data Tracker Commercial Laboratory Seroprevalence Survey Data. Atlanta, United States of America: Centers for Disease Control and Prevention (CDC).                                                                                                                                                                                                                                                                                                                                                                                                                                                                          |
| USA, New York       | Rosenberg ES, Tesoriero JM, Rosenthal EM, Chung R, Barranco MA, Styer LM, Parker MM, John Leung SY, Morne JE, Greene D, Holtgrave DR, Hoefler D, Kumar J, Udo T, Hutton B, Zucker HA. Cumulative incidence and diagnosis of SARS-CoV-2 infection in New York. Ann Epidemiol. 2020; 48: 23-29e4.                                                                                                                                                                                                                                                                                                                                                                                          |
| USA, New York       | Centers for Disease Control and Prevention (CDC). CDC COVID Data Tracker Commercial Laboratory Seroprevalence Survey Data. Atlanta, United States of America: Centers for Disease Control and Prevention (CDC).                                                                                                                                                                                                                                                                                                                                                                                                                                                                          |
| USA, North Carolina | Centers for Disease Control and Prevention (CDC). CDC COVID Data Tracker Commercial Laboratory Seroprevalence Survey Data. Atlanta, United States of America: Centers for Disease Control and Prevention (CDC).                                                                                                                                                                                                                                                                                                                                                                                                                                                                          |

|                     |                                                                                                                                                                                                                                                                                                                                                                                                                                                                                                                                                                                                                                                                                          |
|---------------------|------------------------------------------------------------------------------------------------------------------------------------------------------------------------------------------------------------------------------------------------------------------------------------------------------------------------------------------------------------------------------------------------------------------------------------------------------------------------------------------------------------------------------------------------------------------------------------------------------------------------------------------------------------------------------------------|
| USA, North Carolina | Jones JM, Stone M, Sulaeman H, Fink RV, Dave H, Levy ME, Di Germanio C, Green V, Notari E, Saa P, Biggerstaff BJ, Strauss D, Kessler D, Vassallo R, Reik R, Rossmann S, Destree M, Nguyen KA, Sayers M, Lough C, Bougie DW, Ritter M, Latoni G, Weales B, Sime S, Gorlin J, Brown NE, Gould CV, Berney K, Benoit TJ, Miller MJ, Freeman D, Kartik D, Fry AM, Azziz-Baumgartner E, Hall AJ, MacNeil A, Gundlapalli AV, Basavaraju SV, Gerber SI, Patton ME, Custer B, Williamson P, Simmons G, Thornburg NJ, Kleinman S, Stramer SL, Opsomer J, Busch MP. Estimated US Infection- and Vaccine-Induced SARS-CoV-2 Seroprevalence Based on Blood Donations, July 2020-May 2021. JAMA. 2021. |
| USA, North Dakota   | Jones JM, Stone M, Sulaeman H, Fink RV, Dave H, Levy ME, Di Germanio C, Green V, Notari E, Saa P, Biggerstaff BJ, Strauss D, Kessler D, Vassallo R, Reik R, Rossmann S, Destree M, Nguyen KA, Sayers M, Lough C, Bougie DW, Ritter M, Latoni G, Weales B, Sime S, Gorlin J, Brown NE, Gould CV, Berney K, Benoit TJ, Miller MJ, Freeman D, Kartik D, Fry AM, Azziz-Baumgartner E, Hall AJ, MacNeil A, Gundlapalli AV, Basavaraju SV, Gerber SI, Patton ME, Custer B, Williamson P, Simmons G, Thornburg NJ, Kleinman S, Stramer SL, Opsomer J, Busch MP. Estimated US Infection- and Vaccine-Induced SARS-CoV-2 Seroprevalence Based on Blood Donations, July 2020-May 2021. JAMA. 2021. |
| USA, Ohio           | Centers for Disease Control and Prevention (CDC). CDC COVID Data Tracker Commercial Laboratory Seroprevalence Survey Data. Atlanta, United States of America: Centers for Disease Control and Prevention (CDC).                                                                                                                                                                                                                                                                                                                                                                                                                                                                          |
| USA, Oklahoma       | Centers for Disease Control and Prevention (CDC). CDC COVID Data Tracker Commercial Laboratory Seroprevalence Survey Data. Atlanta, United States of America: Centers for Disease Control and Prevention (CDC).                                                                                                                                                                                                                                                                                                                                                                                                                                                                          |
| USA, Oklahoma       | Jones JM, Stone M, Sulaeman H, Fink RV, Dave H, Levy ME, Di Germanio C, Green V, Notari E, Saa P, Biggerstaff BJ, Strauss D, Kessler D, Vassallo R, Reik R, Rossmann S, Destree M, Nguyen KA, Sayers M, Lough C, Bougie DW, Ritter M, Latoni G, Weales B, Sime S, Gorlin J, Brown NE, Gould CV, Berney K, Benoit TJ, Miller MJ, Freeman D, Kartik D, Fry AM, Azziz-Baumgartner E, Hall AJ, MacNeil A, Gundlapalli AV, Basavaraju SV, Gerber SI, Patton ME, Custer B, Williamson P, Simmons G, Thornburg NJ, Kleinman S, Stramer SL, Opsomer J, Busch MP. Estimated US Infection- and Vaccine-Induced SARS-CoV-2 Seroprevalence Based on Blood Donations, July 2020-May 2021. JAMA. 2021. |
| USA, Oregon         | Centers for Disease Control and Prevention (CDC). CDC COVID Data Tracker Commercial Laboratory Seroprevalence Survey Data. Atlanta, United States of America: Centers for Disease Control and Prevention (CDC).                                                                                                                                                                                                                                                                                                                                                                                                                                                                          |
| USA, Pennsylvania   | Centers for Disease Control and Prevention (CDC). CDC COVID Data Tracker Commercial Laboratory Seroprevalence Survey Data. Atlanta, United States of America: Centers for Disease Control and Prevention (CDC).                                                                                                                                                                                                                                                                                                                                                                                                                                                                          |
| USA, Rhode Island   | Centers for Disease Control and Prevention (CDC). CDC COVID Data Tracker Commercial Laboratory Seroprevalence Survey Data. Atlanta, United States of America: Centers for Disease Control and Prevention (CDC).                                                                                                                                                                                                                                                                                                                                                                                                                                                                          |
| USA, Rhode Island   | Jones JM, Stone M, Sulaeman H, Fink RV, Dave H, Levy ME, Di Germanio C, Green V, Notari E, Saa P, Biggerstaff BJ, Strauss D, Kessler D, Vassallo R, Reik R, Rossmann S, Destree M, Nguyen KA, Sayers M, Lough C, Bougie DW, Ritter M, Latoni G, Weales B, Sime S, Gorlin J, Brown NE, Gould CV, Berney K, Benoit TJ, Miller MJ, Freeman D, Kartik D, Fry AM, Azziz-Baumgartner E, Hall AJ, MacNeil A, Gundlapalli AV, Basavaraju SV, Gerber SI, Patton ME, Custer B, Williamson P, Simmons G, Thornburg NJ, Kleinman S, Stramer SL, Opsomer J, Busch MP. Estimated US Infection- and Vaccine-Induced SARS-CoV-2 Seroprevalence Based on Blood Donations, July 2020-May 2021. JAMA. 2021. |
| USA, South Carolina | Centers for Disease Control and Prevention (CDC). CDC COVID Data Tracker Commercial Laboratory Seroprevalence Survey Data. Atlanta, United States of America: Centers for Disease Control and Prevention (CDC).                                                                                                                                                                                                                                                                                                                                                                                                                                                                          |

|                     |                                                                                                                                                                                                                                                                                                                                                                                                                                                                                                                                                                                                                                                                                          |
|---------------------|------------------------------------------------------------------------------------------------------------------------------------------------------------------------------------------------------------------------------------------------------------------------------------------------------------------------------------------------------------------------------------------------------------------------------------------------------------------------------------------------------------------------------------------------------------------------------------------------------------------------------------------------------------------------------------------|
| USA, South Carolina | Jones JM, Stone M, Sulaeman H, Fink RV, Dave H, Levy ME, Di Germanio C, Green V, Notari E, Saa P, Biggerstaff BJ, Strauss D, Kessler D, Vassallo R, Reik R, Rossmann S, Destree M, Nguyen KA, Sayers M, Lough C, Bougie DW, Ritter M, Latoni G, Weales B, Sime S, Gorlin J, Brown NE, Gould CV, Berney K, Benoit TJ, Miller MJ, Freeman D, Kartik D, Fry AM, Azziz-Baumgartner E, Hall AJ, MacNeil A, Gundlapalli AV, Basavaraju SV, Gerber SI, Patton ME, Custer B, Williamson P, Simmons G, Thornburg NJ, Kleinman S, Stramer SL, Opsomer J, Busch MP. Estimated US Infection- and Vaccine-Induced SARS-CoV-2 Seroprevalence Based on Blood Donations, July 2020-May 2021. JAMA. 2021. |
| USA, South Dakota   | Jones JM, Stone M, Sulaeman H, Fink RV, Dave H, Levy ME, Di Germanio C, Green V, Notari E, Saa P, Biggerstaff BJ, Strauss D, Kessler D, Vassallo R, Reik R, Rossmann S, Destree M, Nguyen KA, Sayers M, Lough C, Bougie DW, Ritter M, Latoni G, Weales B, Sime S, Gorlin J, Brown NE, Gould CV, Berney K, Benoit TJ, Miller MJ, Freeman D, Kartik D, Fry AM, Azziz-Baumgartner E, Hall AJ, MacNeil A, Gundlapalli AV, Basavaraju SV, Gerber SI, Patton ME, Custer B, Williamson P, Simmons G, Thornburg NJ, Kleinman S, Stramer SL, Opsomer J, Busch MP. Estimated US Infection- and Vaccine-Induced SARS-CoV-2 Seroprevalence Based on Blood Donations, July 2020-May 2021. JAMA. 2021. |
| USA, Tennessee      | Centers for Disease Control and Prevention (CDC). CDC COVID Data Tracker Commercial Laboratory Seroprevalence Survey Data. Atlanta, United States of America: Centers for Disease Control and Prevention (CDC).                                                                                                                                                                                                                                                                                                                                                                                                                                                                          |
| USA, Texas          | Centers for Disease Control and Prevention (CDC). CDC COVID Data Tracker Commercial Laboratory Seroprevalence Survey Data. Atlanta, United States of America: Centers for Disease Control and Prevention (CDC).                                                                                                                                                                                                                                                                                                                                                                                                                                                                          |
| USA, Utah           | Havers FP, Reed C, Lim T, Montgomery JM, Klena JD, Hall AJ, Fry AM, Cannon DL, Chiang CF, Gibbons A, Krapinunaya I, Morales-Betoulle M, Roguski K, Rasheed MAU, Freeman B, Lester S, Mills L, Carroll DS, Owen SM, Johnson JA, Semenova V, Blackmore C, Blog D, Chai SJ, Dunn A, Hand J, Jain S, Lindquist S, Lynfield R, Pritchard S, Sokol T, Sosa L, Turabelidze G, Watkins SM, Wiesman J, Williams RW, Yendell S, Schiffer J, Thornburg NJ. Seroprevalence of Antibodies to SARS-CoV-2 in 10 Sites in the United States, March 23-May 12, 2020. JAMA Intern Med. 2020.                                                                                                               |
| USA, Utah           | Centers for Disease Control and Prevention (CDC). CDC COVID Data Tracker Commercial Laboratory Seroprevalence Survey Data. Atlanta, United States of America: Centers for Disease Control and Prevention (CDC).                                                                                                                                                                                                                                                                                                                                                                                                                                                                          |
| USA, Utah           | Jones JM, Stone M, Sulaeman H, Fink RV, Dave H, Levy ME, Di Germanio C, Green V, Notari E, Saa P, Biggerstaff BJ, Strauss D, Kessler D, Vassallo R, Reik R, Rossmann S, Destree M, Nguyen KA, Sayers M, Lough C, Bougie DW, Ritter M, Latoni G, Weales B, Sime S, Gorlin J, Brown NE, Gould CV, Berney K, Benoit TJ, Miller MJ, Freeman D, Kartik D, Fry AM, Azziz-Baumgartner E, Hall AJ, MacNeil A, Gundlapalli AV, Basavaraju SV, Gerber SI, Patton ME, Custer B, Williamson P, Simmons G, Thornburg NJ, Kleinman S, Stramer SL, Opsomer J, Busch MP. Estimated US Infection- and Vaccine-Induced SARS-CoV-2 Seroprevalence Based on Blood Donations, July 2020-May 2021. JAMA. 2021. |
| USA, Vermont        | Centers for Disease Control and Prevention (CDC). CDC COVID Data Tracker Commercial Laboratory Seroprevalence Survey Data. Atlanta, United States of America: Centers for Disease Control and Prevention (CDC).                                                                                                                                                                                                                                                                                                                                                                                                                                                                          |
| USA, Vermont        | Jones JM, Stone M, Sulaeman H, Fink RV, Dave H, Levy ME, Di Germanio C, Green V, Notari E, Saa P, Biggerstaff BJ, Strauss D, Kessler D, Vassallo R, Reik R, Rossmann S, Destree M, Nguyen KA, Sayers M, Lough C, Bougie DW, Ritter M, Latoni G, Weales B, Sime S, Gorlin J, Brown NE, Gould CV, Berney K, Benoit TJ, Miller MJ, Freeman D, Kartik D, Fry AM, Azziz-Baumgartner E, Hall AJ, MacNeil A, Gundlapalli AV, Basavaraju SV, Gerber SI, Patton ME, Custer B, Williamson P, Simmons G, Thornburg NJ, Kleinman S, Stramer SL, Opsomer J, Busch MP. Estimated US Infection- and Vaccine-Induced SARS-CoV-2 Seroprevalence Based on Blood Donations, July 2020-May 2021. JAMA. 2021. |
| USA, Virginia       | Centers for Disease Control and Prevention (CDC). CDC COVID Data Tracker Commercial Laboratory Seroprevalence Survey Data. Atlanta, United States of America: Centers for Disease Control and Prevention (CDC).                                                                                                                                                                                                                                                                                                                                                                                                                                                                          |



|                     |                                                                                                                                                                                                                                                                                                                                                                                                                                                                                                                                                                                                                                                                                          |
|---------------------|------------------------------------------------------------------------------------------------------------------------------------------------------------------------------------------------------------------------------------------------------------------------------------------------------------------------------------------------------------------------------------------------------------------------------------------------------------------------------------------------------------------------------------------------------------------------------------------------------------------------------------------------------------------------------------------|
| USA, Washington     | Centers for Disease Control and Prevention (CDC). CDC COVID Data Tracker Commercial Laboratory Seroprevalence Survey Data. Atlanta, United States of America: Centers for Disease Control and Prevention (CDC).                                                                                                                                                                                                                                                                                                                                                                                                                                                                          |
| USA, Washington, DC | Centers for Disease Control and Prevention (CDC). CDC COVID Data Tracker Commercial Laboratory Seroprevalence Survey Data. Atlanta, United States of America: Centers for Disease Control and Prevention (CDC).                                                                                                                                                                                                                                                                                                                                                                                                                                                                          |
| USA, West Virginia  | Centers for Disease Control and Prevention (CDC). CDC COVID Data Tracker Commercial Laboratory Seroprevalence Survey Data. Atlanta, United States of America: Centers for Disease Control and Prevention (CDC).                                                                                                                                                                                                                                                                                                                                                                                                                                                                          |
| USA, Wisconsin      | Centers for Disease Control and Prevention (CDC). CDC COVID Data Tracker Commercial Laboratory Seroprevalence Survey Data. Atlanta, United States of America: Centers for Disease Control and Prevention (CDC).                                                                                                                                                                                                                                                                                                                                                                                                                                                                          |
| USA, Wyoming        | Centers for Disease Control and Prevention (CDC). CDC COVID Data Tracker Commercial Laboratory Seroprevalence Survey Data. Atlanta, United States of America: Centers for Disease Control and Prevention (CDC).                                                                                                                                                                                                                                                                                                                                                                                                                                                                          |
| USA, Wyoming        | Jones JM, Stone M, Sulaeman H, Fink RV, Dave H, Levy ME, Di Germanio C, Green V, Notari E, Saa P, Biggerstaff BJ, Strauss D, Kessler D, Vassallo R, Reik R, Rossmann S, Destree M, Nguyen KA, Sayers M, Lough C, Bougie DW, Ritter M, Latoni G, Weales B, Sime S, Gorlin J, Brown NE, Gould CV, Berney K, Benoit TJ, Miller MJ, Freeman D, Kartik D, Fry AM, Azziz-Baumgartner E, Hall AJ, MacNeil A, Gundlapalli AV, Basavaraju SV, Gerber SI, Patton ME, Custer B, Williamson P, Simmons G, Thornburg NJ, Kleinman S, Stramer SL, Opsomer J, Busch MP. Estimated US Infection- and Vaccine-Induced SARS-CoV-2 Seroprevalence Based on Blood Donations, July 2020-May 2021. JAMA. 2021. |
